# Supplementary material for: The Genetic Landscape of Canine Tumors: Insights from the Canine Cancer Genome Atlas (CCGA)
Source: Research Square preprint supplement (doi:10.21203/rs.3.rs-5025541/v1), 2024-09-19
Supplement: Supplementary file 1 [file 0c091f11c3553c969b0220c5.xlsx]

## Sheet: Mammary Tumor
Tumor_Sample_Barcode	Chromosome	Start_Position	End_Position	Reference_Allele	Tumor_Seq_Allele2	Hugo_Symbol	Variant_Classification	tx	exon	txChange	aaChange	Variant_Type	Func.refGene	Gene.refGene	GeneDetail.refGene	ExonicFunc.refGene	AAChange.refGene	Project	TumorType
SRR7780731-SRR7780732	chr8	62307962	62307962	G	A	PPP4R3A	Nonsense_Mutation	ENSCAFT00000091883.1	exon11	c.C1288T	p.R430X	SNP	exonic	PPP4R3A		stopgain	PPP4R3A:ENSCAFT00000091883.1:exon11:c.C1288T:p.R430X,PPP4R3A:ENSCAFT00000027870.4:exon13:c.C2005T:p.R669X	SRP159481	Mammary Tumor
SRR7780733-SRR7780734	chr34	38980421	38980421	T	A	NAALADL2	Nonsense_Mutation	ENSCAFT00000024622.4	exon2	c.T422A	p.L141X	SNP	exonic	NAALADL2		stopgain	NAALADL2:ENSCAFT00000024622.4:exon2:c.T422A:p.L141X,NAALADL2:ENSCAFT00000066844.1:exon2:c.T455A:p.L152X,NAALADL2:ENSCAFT00000082453.1:exon2:c.T488A:p.L163X,NAALADL2:ENSCAFT00000065182.1:exon3:c.T470A:p.L157X,NAALADL2:ENSCAFT00000073039.1:exon3:c.T470A:p.L157X,NAALADL2:ENSCAFT00000079339.1:exon3:c.T371A:p.L124X,NAALADL2:ENSCAFT00000080646.1:exon3:c.T371A:p.L124X	SRP159481	Mammary Tumor
SRR7780733-SRR7780734	chr38	2052975	2052975	C	T	MFSD4A	Nonsense_Mutation	ENSCAFT00000016099.4	exon5	c.C886T	p.Q296X	SNP	exonic	MFSD4A		stopgain	MFSD4A:ENSCAFT00000016099.4:exon5:c.C886T:p.Q296X	SRP159481	Mammary Tumor
SRR7780733-SRR7780734	chr7	25299953	25299953	C	T	RC3H1	Nonsense_Mutation	ENSCAFT00000022951.4	exon15	c.C2671T	p.Q891X	SNP	exonic	RC3H1		stopgain	RC3H1:ENSCAFT00000022951.4:exon15:c.C2671T:p.Q891X	SRP159481	Mammary Tumor
SRR7780733-SRR7780734	chr8	35070922	35070922	G	A	LRRC9	Nonsense_Mutation	ENSCAFT00000043370.3	exon2	c.G245A	p.W82X	SNP	exonic	LRRC9		stopgain	LRRC9:ENSCAFT00000043370.3:exon2:c.G245A:p.W82X	SRP159481	Mammary Tumor
SRR7780735-SRR7780736	chr10	26823914	26823914	C	A	GCAT	Nonsense_Mutation	ENSCAFT00000002278.4	exon3	c.G427T	p.E143X	SNP	exonic	GCAT		stopgain	GCAT:ENSCAFT00000002278.4:exon3:c.G427T:p.E143X,GCAT:ENSCAFT00000090630.1:exon3:c.G427T:p.E143X	SRP159481	Mammary Tumor
SRR7780740-SRR7780739	chr7	45386558	45386558	C	T	SLC14A1	Nonsense_Mutation	ENSCAFT00000062294.1	exon8	c.G1092A	p.W364X	SNP	exonic	SLC14A1		stopgain	SLC14A1:ENSCAFT00000062294.1:exon8:c.G1092A:p.W364X,SLC14A1:ENSCAFT00000037992.3:exon9:c.G1032A:p.W344X,SLC14A1:ENSCAFT00000062655.1:exon9:c.G1209A:p.W403X,SLC14A1:ENSCAFT00000088333.1:exon10:c.G1149A:p.W383X	SRP159481	Mammary Tumor
SRR7780744-SRR7780743	chr26	37886025	37886025	C	T	PTEN	Nonsense_Mutation	ENSCAFT00000024821.4	exon4	c.C193T	p.Q65X	SNP	exonic	PTEN		stopgain	PTEN:ENSCAFT00000024821.4:exon4:c.C193T:p.Q65X,PTEN:ENSCAFT00000087317.1:exon8:c.C289T:p.Q97X	SRP159481	Mammary Tumor
SRR7780771-SRR7780770	chr29	6131534	6131534	G	T	RP1	Nonsense_Mutation	ENSCAFT00000011204.3	exon5	c.G2383T	p.G795X	SNP	exonic	RP1		stopgain	RP1:ENSCAFT00000011204.3:exon5:c.G2383T:p.G795X	SRP159481	Mammary Tumor
SRR7780773-SRR7780772	chr27	35945266	35945266	G	A	CLEC1B	Nonsense_Mutation	ENSCAFT00000021464.3	exon3	c.C181T	p.R61X	SNP	exonic	CLEC1B		stopgain	CLEC1B:ENSCAFT00000021464.3:exon3:c.C181T:p.R61X,CLEC1B:ENSCAFT00000021470.4:exon3:c.C181T:p.R61X,CLEC1B:ENSCAFT00000072950.1:exon3:c.C181T:p.R61X	SRP159481	Mammary Tumor
SRR7780782-SRR7780783	chr5	31786422	31786422	T	A	VMO1	Nonsense_Mutation	ENSCAFT00000025138.2	exon2	c.T233A	p.L78X	SNP	exonic	VMO1		stopgain	VMO1:ENSCAFT00000025138.2:exon2:c.T233A:p.L78X	SRP159481	Mammary Tumor
SRR7780802-SRR7780803	chr24	23049217	23049217	A	T	CHMP4B	Nonsense_Mutation	ENSCAFT00000011977.4	exon5	c.A613T	p.K205X	SNP	exonic	CHMP4B		stopgain	CHMP4B:ENSCAFT00000011977.4:exon5:c.A613T:p.K205X	SRP159481	Mammary Tumor
SRR7780810-SRR7780811	chr6	741151	741151	G	A	GUSB	Nonsense_Mutation	ENSCAFT00000016183.4	exon4	c.C601T	p.Q201X	SNP	exonic	GUSB		stopgain	GUSB:ENSCAFT00000016183.4:exon4:c.C601T:p.Q201X,GUSB:ENSCAFT00000073128.1:exon6:c.C541T:p.Q181X	SRP159481	Mammary Tumor
SRR7780814-SRR7780815	chr14	13686684	13686684	C	A	ABCB1	Nonsense_Mutation	ENSCAFT00000061997.1	exon14	c.G1681T	p.E561X	SNP	exonic	ABCB1		stopgain	ABCB1:ENSCAFT00000061997.1:exon14:c.G1681T:p.E561X,ABCB1:ENSCAFT00000002896.4:exon16:c.G1906T:p.E636X,ABCB1:ENSCAFT00000070452.1:exon16:c.G1906T:p.E636X,ABCB1:ENSCAFT00000090274.1:exon16:c.G1906T:p.E636X,ABCB1:ENSCAFT00000092086.1:exon16:c.G1906T:p.E636X	SRP159481	Mammary Tumor
SRR7780814-SRR7780815	chr5	24274834	24274834	C	A	ATM	Nonsense_Mutation	ENSCAFT00000077708.1	exon7	c.G502T	p.E168X	SNP	exonic	ATM		stopgain	ATM:ENSCAFT00000077708.1:exon7:c.G502T:p.E168X,ATM:ENSCAFT00000023032.5:exon8:c.G667T:p.E223X,ATM:ENSCAFT00000048574.2:exon8:c.G667T:p.E223X	SRP159481	Mammary Tumor
SRR7780830-SRR7780831	chr14	46874252	46874252	G	A	DPY19L2	Nonsense_Mutation	ENSCAFT00000005112.5	exon3	c.C481T	p.R161X	SNP	exonic	DPY19L2		stopgain	DPY19L2:ENSCAFT00000005112.5:exon3:c.C481T:p.R161X,DPY19L2:ENSCAFT00000045176.3:exon3:c.C481T:p.R161X,DPY19L2:ENSCAFT00000045311.2:exon3:c.C481T:p.R161X,DPY19L2:ENSCAFT00000080577.1:exon3:c.C481T:p.R161X	SRP159481	Mammary Tumor
SRR7780834-SRR7780835	chr1	101436889	101436889	C	A	ZNF470	Nonsense_Mutation	ENSCAFT00000086972.1	exon2	c.G391T	p.E131X	SNP	exonic	ZNF470		stopgain	ZNF470:ENSCAFT00000086972.1:exon2:c.G391T:p.E131X,ZNF470:ENSCAFT00000045096.2:exon4:c.G505T:p.E169X	SRP159481	Mammary Tumor
SRR7780836-SRR7780837	chr2	43235867	43235867	C	A	IL6ST	Nonsense_Mutation	ENSCAFT00000011081.4	exon4	c.G703T	p.E235X	SNP	exonic	IL6ST		stopgain	IL6ST:ENSCAFT00000011081.4:exon4:c.G703T:p.E235X,IL6ST:ENSCAFT00000067674.1:exon4:c.G595T:p.E199X,IL6ST:ENSCAFT00000068395.1:exon4:c.G703T:p.E235X,IL6ST:ENSCAFT00000071821.1:exon4:c.G595T:p.E199X	SRP159481	Mammary Tumor
SRR7780836-SRR7780837	chr21	29578182	29578182	C	T	CNGA4	Nonsense_Mutation	ENSCAFT00000046689.3	exon4	c.C1009T	p.Q337X	SNP	exonic	CNGA4		stopgain	CNGA4:ENSCAFT00000046689.3:exon4:c.C1009T:p.Q337X,CNGA4:ENSCAFT00000084263.1:exon4:c.C346T:p.Q116X,CNGA4:ENSCAFT00000010334.2:exon5:c.C1039T:p.Q347X	SRP159481	Mammary Tumor
SRR7780843-SRR7781004	chr17	63677106	63677106	G	A	DDX20	Nonsense_Mutation	ENSCAFT00000021679.5	exon11	c.C2128T	p.Q710X	SNP	exonic	DDX20		stopgain	DDX20:ENSCAFT00000021679.5:exon11:c.C2128T:p.Q710X	SRP159481	Mammary Tumor
SRR7780867-SRR7780866	chr9	49007052	49007052	C	T	NOTCH1	Nonsense_Mutation	ENSCAFT00000031242.5	exon21	c.C3376T	p.Q1126X	SNP	exonic	NOTCH1		stopgain	NOTCH1:ENSCAFT00000031242.5:exon21:c.C3376T:p.Q1126X	SRP159481	Mammary Tumor
SRR7780869-SRR7780868	chr23	8422169	8422169	G	A	SCN10A	Nonsense_Mutation	ENSCAFT00000012349.4	exon29	c.C4723T	p.R1575X	SNP	exonic	SCN10A		stopgain	SCN10A:ENSCAFT00000012349.4:exon29:c.C4723T:p.R1575X	SRP159481	Mammary Tumor
SRR7780869-SRR7780868	chr4	19769081	19769081	C	T	TET1	Nonsense_Mutation	ENSCAFT00000043209.3	exon1	c.C823T	p.R275X	SNP	exonic	TET1		stopgain	TET1:ENSCAFT00000043209.3:exon1:c.C823T:p.R275X	SRP159481	Mammary Tumor
SRR7780878-SRR7780879	chr5	32564570	32564570	C	T	TP53	Nonsense_Mutation	ENSCAFT00000086831.1	exon2	c.G264A	p.W88X	SNP	exonic	TP53		stopgain	TP53:ENSCAFT00000086831.1:exon2:c.G264A:p.W88X,TP53:ENSCAFT00000026465.4:exon4:c.G333A:p.W111X,TP53:ENSCAFT00000081814.1:exon4:c.G525A:p.W175X	SRP159481	Mammary Tumor
SRR7780887-SRR7780886	chr26	37909915	37909915	G	A	PTEN	Nonsense_Mutation	ENSCAFT00000024821.4	exon7	c.G726A	p.W242X	SNP	exonic	PTEN		stopgain	PTEN:ENSCAFT00000024821.4:exon7:c.G726A:p.W242X,PTEN:ENSCAFT00000087317.1:exon11:c.G822A:p.W274X	SRP159481	Mammary Tumor
SRR7780887-SRR7780886	chr30	25193765	25193765	G	C	ANXA2	Nonsense_Mutation	ENSCAFT00000067017.1	exon2	c.C288G	p.Y96X	SNP	exonic	ANXA2		stopgain	ANXA2:ENSCAFT00000067017.1:exon2:c.C288G:p.Y96X,ANXA2:ENSCAFT00000061243.1:exon3:c.C225G:p.Y75X,ANXA2:ENSCAFT00000084529.1:exon3:c.C225G:p.Y75X,ANXA2:ENSCAFT00000026423.4:exon4:c.C267G:p.Y89X,ANXA2:ENSCAFT00000077294.1:exon4:c.C294G:p.Y98X	SRP159481	Mammary Tumor
SRR7780889-SRR7780888	chr11	66098283	66098283	G	C	ECPAS	Nonsense_Mutation	ENSCAFT00000004799.5	exon14	c.C1446G	p.Y482X	SNP	exonic	ECPAS		stopgain	ECPAS:ENSCAFT00000004799.5:exon14:c.C1446G:p.Y482X	SRP159481	Mammary Tumor
SRR7780902-SRR7780901	chr1	102032721	102032721	G	A	NLRP9	Nonsense_Mutation	ENSCAFT00000003954.4	exon4	c.C1165T	p.R389X	SNP	exonic	NLRP9		stopgain	NLRP9:ENSCAFT00000003954.4:exon4:c.C1165T:p.R389X	SRP159481	Mammary Tumor
SRR7780902-SRR7780901	chr5	61340898	61340898	C	T	CAMTA1	Nonsense_Mutation	ENSCAFT00000031244.5	exon7	c.C1483T	p.Q495X	SNP	exonic	CAMTA1		stopgain	CAMTA1:ENSCAFT00000031244.5:exon7:c.C1483T:p.Q495X,CAMTA1:ENSCAFT00000031250.4:exon7:c.C1483T:p.Q495X,CAMTA1:ENSCAFT00000092441.1:exon9:c.C1801T:p.Q601X	SRP159481	Mammary Tumor
SRR7780920-SRR7780921	chr3	58326866	58326866	C	A	ACSBG1	Nonsense_Mutation	ENSCAFT00000043911.3	exon10	c.G1558T	p.G520X	SNP	exonic	ACSBG1		stopgain	ACSBG1:ENSCAFT00000043911.3:exon10:c.G1558T:p.G520X,ACSBG1:ENSCAFT00000070585.1:exon10:c.G1507T:p.G503X,ACSBG1:ENSCAFT00000022529.3:exon11:c.G1381T:p.G461X,ACSBG1:ENSCAFT00000093924.1:exon11:c.G1657T:p.G553X	SRP159481	Mammary Tumor
SRR7780920-SRR7780921	chr33	23148643	23148643	C	T	POGLUT1	Nonsense_Mutation	ENSCAFT00000045332.3	exon12	c.C1144T	p.Q382X	SNP	exonic	POGLUT1		stopgain	POGLUT1:ENSCAFT00000045332.3:exon12:c.C1144T:p.Q382X	SRP159481	Mammary Tumor
SRR7780926-SRR7780927	chr9	49016489	49016489	C	T	NOTCH1	Nonsense_Mutation	ENSCAFT00000031242.5	exon34	c.C6910T	p.Q2304X	SNP	exonic	NOTCH1		stopgain	NOTCH1:ENSCAFT00000031242.5:exon34:c.C6910T:p.Q2304X	SRP159481	Mammary Tumor
SRR7780952-SRR7781054	chr17	29570398	29570398	G	A	CEBPZ	Nonsense_Mutation	ENSCAFT00000009851.4	exon10	c.C2320T	p.R774X	SNP	exonic	CEBPZ		stopgain	CEBPZ:ENSCAFT00000009851.4:exon10:c.C2320T:p.R774X	SRP159481	Mammary Tumor
SRR7780960-SRR7780959	chr18	39499216	39499216	C	T	OR8U3	Nonsense_Mutation	ENSCAFT00000037784.2	exon1	c.C700T	p.R234X	SNP	exonic	OR8U3		stopgain	OR8U3:ENSCAFT00000037784.2:exon1:c.C700T:p.R234X	SRP159481	Mammary Tumor
SRR7780960-SRR7780959	chr27	30159660	30159660	C	T	LMO3	Nonsense_Mutation	ENSCAFT00000020038.4	exon2	c.C46T	p.Q16X	SNP	exonic	LMO3		stopgain	LMO3:ENSCAFT00000020038.4:exon2:c.C46T:p.Q16X,LMO3:ENSCAFT00000044444.3:exon2:c.C67T:p.Q23X,LMO3:ENSCAFT00000048736.3:exon3:c.C13T:p.Q5X,LMO3:ENSCAFT00000088400.1:exon3:c.C97T:p.Q33X,LMO3:ENSCAFT00000090190.1:exon6:c.C535T:p.Q179X,LMO3:ENSCAFT00000090652.1:exon6:c.C535T:p.Q179X	SRP159481	Mammary Tumor
SRR7780965-SRR7780962	chr18	54041664	54041664	C	T	MTA2	Nonsense_Mutation	ENSCAFT00000025051.3	exon6	c.C430T	p.Q144X	SNP	exonic	MTA2		stopgain	MTA2:ENSCAFT00000025051.3:exon6:c.C430T:p.Q144X	SRP159481	Mammary Tumor
SRR7780967-SRR7780964	chr6	39823382	39823382	C	T	MSLNL	Nonsense_Mutation	ENSCAFT00000031179.4	exon5	c.C484T	p.R162X	SNP	exonic	MSLNL		stopgain	MSLNL:ENSCAFT00000031179.4:exon5:c.C484T:p.R162X	SRP159481	Mammary Tumor
SRR7780969-SRR7780966	chr1	102151857	102151857	G	T	ZNF579	Nonsense_Mutation	ENSCAFT00000004042.4	exon3	c.G1099T	p.E367X	SNP	exonic	ZNF579		stopgain	ZNF579:ENSCAFT00000004042.4:exon3:c.G1099T:p.E367X	SRP159481	Mammary Tumor
SRR7780970-SRR7780971	chr16	26710155	26710155	C	A	TACC1	Nonsense_Mutation	ENSCAFT00000059598.1	exon3	c.G1498T	p.E500X	SNP	exonic	TACC1		stopgain	TACC1:ENSCAFT00000059598.1:exon3:c.G1498T:p.E500X,TACC1:ENSCAFT00000062175.1:exon3:c.G820T:p.E274X,TACC1:ENSCAFT00000074376.1:exon3:c.G820T:p.E274X,TACC1:ENSCAFT00000009478.4:exon4:c.G928T:p.E310X,TACC1:ENSCAFT00000068135.1:exon4:c.G928T:p.E310X,TACC1:ENSCAFT00000069533.1:exon4:c.G928T:p.E310X	SRP159481	Mammary Tumor
SRR7780972-SRR7780975	chr20	22573050	22573050	G	C	FRMD4B	Nonstop_Mutation	ENSCAFT00000064421.1	exon17	c.G2894C	p.X965S	SNP	exonic	FRMD4B		stoploss	FRMD4B:ENSCAFT00000064421.1:exon17:c.G2894C:p.X965S,FRMD4B:ENSCAFT00000010531.4:exon23:c.G3107C:p.X1036S	SRP159481	Mammary Tumor
SRR7780972-SRR7780975	chr31	37879660	37879660	G	T	AGPAT3	Nonsense_Mutation	ENSCAFT00000016943.4	exon9	c.G1027T	p.E343X	SNP	exonic	AGPAT3		stopgain	AGPAT3:ENSCAFT00000016943.4:exon9:c.G1027T:p.E343X	SRP159481	Mammary Tumor
SRR7780974-SRR7780977	chr10	24895578	24895578	C	T	TNRC6B	Nonsense_Mutation	ENSCAFT00000001986.5	exon5	c.G2225A	p.W742X	SNP	exonic	TNRC6B		stopgain	TNRC6B:ENSCAFT00000001986.5:exon5:c.G2225A:p.W742X,TNRC6B:ENSCAFT00000047971.3:exon5:c.G2123A:p.W708X,TNRC6B:ENSCAFT00000088909.1:exon5:c.G2225A:p.W742X,TNRC6B:ENSCAFT00000045467.3:exon6:c.G2153A:p.W718X,TNRC6B:ENSCAFT00000001904.4:exon8:c.G2231A:p.W744X,TNRC6B:ENSCAFT00000068805.1:exon8:c.G2231A:p.W744X,TNRC6B:ENSCAFT00000079767.1:exon8:c.G2231A:p.W744X,TNRC6B:ENSCAFT00000082685.1:exon8:c.G2231A…	SRP159481	Mammary Tumor
SRR7780985-SRR7780984	chr5	34114937	34114937	C	T	CFAP52	Nonsense_Mutation	ENSCAFT00000027628.4	exon8	c.C895T	p.R299X	SNP	exonic	CFAP52		stopgain	CFAP52:ENSCAFT00000027628.4:exon8:c.C895T:p.R299X	SRP159481	Mammary Tumor
SRR7780989-SRR7780988	chr1	106450873	106450873	C	A	MYH14	Nonsense_Mutation	ENSCAFT00000005236.4	exon2	c.G646T	p.E216X	SNP	exonic	MYH14		stopgain	MYH14:ENSCAFT00000005236.4:exon2:c.G646T:p.E216X,MYH14:ENSCAFT00000069205.1:exon2:c.G646T:p.E216X,MYH14:ENSCAFT00000072969.1:exon2:c.G646T:p.E216X,MYH14:ENSCAFT00000078895.1:exon2:c.G646T:p.E216X,MYH14:ENSCAFT00000044692.3:exon3:c.G538T:p.E180X	SRP159481	Mammary Tumor
SRR7780989-SRR7780988	chr19	28789490	28789490	G	A	CLASP1	Nonsense_Mutation	ENSCAFT00000007674.4	exon32	c.G3383A	p.W1128X	SNP	exonic	CLASP1		stopgain	CLASP1:ENSCAFT00000007674.4:exon32:c.G3383A:p.W1128X	SRP159481	Mammary Tumor
SRR7780989-SRR7780988	chr2	59329730	59329730	C	T	NLRC5	Nonsense_Mutation	ENSCAFT00000014230.4	exon4	c.G486A	p.W162X	SNP	exonic	NLRC5		stopgain	NLRC5:ENSCAFT00000014230.4:exon4:c.G486A:p.W162X,NLRC5:ENSCAFT00000059964.1:exon4:c.G546A:p.W182X,NLRC5:ENSCAFT00000060465.1:exon4:c.G546A:p.W182X,NLRC5:ENSCAFT00000064277.1:exon4:c.G546A:p.W182X,NLRC5:ENSCAFT00000072274.1:exon4:c.G546A:p.W182X,NLRC5:ENSCAFT00000072910.1:exon4:c.G486A:p.W162X,NLRC5:ENSCAFT00000079308.1:exon4:c.G546A:p.W182X,NLRC5:ENSCAFT00000079386.1:exon4:c.G546A:p.W182X,NLRC5:E…	SRP159481	Mammary Tumor
SRR7780989-SRR7780988	chr34	12992691	12992691	C	T	MRPL47	Nonsense_Mutation	ENSCAFT00000018082.4	exon6	c.G540A	p.W180X	SNP	exonic	MRPL47		stopgain	MRPL47:ENSCAFT00000018082.4:exon6:c.G540A:p.W180X	SRP159481	Mammary Tumor
SRR7780992-SRR7780993	chr6	16785770	16785770	C	T	ARMC5	Nonsense_Mutation	ENSCAFT00000081024.1	exon2	c.G1410A	p.W470X	SNP	exonic	ARMC5		stopgain	ARMC5:ENSCAFT00000081024.1:exon2:c.G1410A:p.W470X,ARMC5:ENSCAFT00000026742.4:exon3:c.G1317A:p.W439X,ARMC5:ENSCAFT00000076853.1:exon3:c.G1317A:p.W439X	SRP159481	Mammary Tumor
SRR7780996-SRR7780997	chr4	32457334	32457334	C	T	CDHR1	Nonsense_Mutation	ENSCAFT00000025218.4	exon15	c.C2434T	p.Q812X	SNP	exonic	CDHR1		stopgain	CDHR1:ENSCAFT00000025218.4:exon15:c.C2434T:p.Q812X	SRP159481	Mammary Tumor
SRR7780996-SRR7780997	chr4	68298552	68298552	C	T	C6	Nonsense_Mutation	ENSCAFT00000029526.4	exon11	c.C1600T	p.R534X	SNP	exonic	C6		stopgain	C6:ENSCAFT00000029526.4:exon11:c.C1600T:p.R534X,C6:ENSCAFT00000074933.1:exon11:c.C1540T:p.R514X	SRP159481	Mammary Tumor
SRR7781000-SRR7781001	chr18	42079853	42079853	G	A	KBTBD4	Nonsense_Mutation	ENSCAFT00000013366.4	exon4	c.G1121A	p.W374X	SNP	exonic	KBTBD4		stopgain	KBTBD4:ENSCAFT00000013366.4:exon4:c.G1121A:p.W374X	SRP159481	Mammary Tumor
SRR7781000-SRR7781001	chr23	1652605	1652605	G	A	NINL	Nonsense_Mutation	ENSCAFT00000007092.5	exon8	c.C1039T	p.Q347X	SNP	exonic	NINL		stopgain	NINL:ENSCAFT00000007092.5:exon8:c.C1039T:p.Q347X	SRP159481	Mammary Tumor
SRR7781009-SRR7781008	chr4	2331079	2331079	C	T	ZP4	Nonsense_Mutation	ENSCAFT00000015935.4	exon10	c.C1552T	p.R518X	SNP	exonic	ZP4		stopgain	ZP4:ENSCAFT00000015935.4:exon10:c.C1552T:p.R518X	SRP159481	Mammary Tumor
SRR7781018-SRR7781019	chr8	44723368	44723368	G	T	PCNX1	Nonsense_Mutation	ENSCAFT00000082396.1	exon35	c.G6235T	p.E2079X	SNP	exonic	PCNX1		stopgain	PCNX1:ENSCAFT00000082396.1:exon35:c.G6235T:p.E2079X,PCNX1:ENSCAFT00000066523.1:exon37:c.G6865T:p.E2289X	SRP159481	Mammary Tumor
SRR7781020-SRR7781021	chr6	32621984	32621984	C	T	GRIN2A	Nonsense_Mutation	ENSCAFT00000030136.4	exon9	c.C2041T	p.R681X	SNP	exonic	GRIN2A		stopgain	GRIN2A:ENSCAFT00000030136.4:exon9:c.C2041T:p.R681X	SRP159481	Mammary Tumor
SRR7781042-SRR7781043	chr27	8475343	8475343	C	A	ARID2	Nonsense_Mutation	ENSCAFT00000014865.4	exon8	c.G898T	p.E300X	SNP	exonic	ARID2		stopgain	ARID2:ENSCAFT00000014865.4:exon8:c.G898T:p.E300X,ARID2:ENSCAFT00000073118.1:exon8:c.G898T:p.E300X,ARID2:ENSCAFT00000084222.1:exon8:c.G898T:p.E300X,ARID2:ENSCAFT00000044680.3:exon10:c.G895T:p.E299X	SRP159481	Mammary Tumor
SRR7781044-SRR7781045	chr1	4586693	4586693	C	T	ZNF407	Nonsense_Mutation	ENSCAFT00000088916.1	exon6	c.G5373A	p.W1791X	SNP	exonic	ZNF407		stopgain	ZNF407:ENSCAFT00000088916.1:exon6:c.G5373A:p.W1791X,ZNF407:ENSCAFT00000000037.4:exon7:c.G5238A:p.W1746X	SRP159481	Mammary Tumor
SRR7781053-SRR7781058	chr32	28386544	28386544	C	T	SGMS2	Nonsense_Mutation	ENSCAFT00000017799.3	exon1	c.C148T	p.R50X	SNP	exonic	SGMS2		stopgain	SGMS2:ENSCAFT00000017799.3:exon1:c.C148T:p.R50X,SGMS2:ENSCAFT00000081547.1:exon3:c.C148T:p.R50X	SRP159481	Mammary Tumor
SRR7781059-SRR7781056	chr5	10415538	10415538	G	A	OR10D5	Nonsense_Mutation	ENSCAFT00000035117.2	exon1	c.C292T	p.Q98X	SNP	exonic	OR10D5		stopgain	OR10D5:ENSCAFT00000035117.2:exon1:c.C292T:p.Q98X	SRP159481	Mammary Tumor
SRR7781059-SRR7781056	chr6	15824663	15824663	C	T	GPR146	Nonsense_Mutation	ENSCAFT00000018692.1	exon1	c.G456A	p.W152X	SNP	exonic	GPR146		stopgain	GPR146:ENSCAFT00000018692.1:exon1:c.G456A:p.W152X	SRP159481	Mammary Tumor
SRR7781065-SRR7781064	chr11	58109333	58109333	G	A	BAAT	Nonsense_Mutation	ENSCAFT00000004077.2	exon1	c.C10T	p.Q4X	SNP	exonic	BAAT		stopgain	BAAT:ENSCAFT00000004077.2:exon1:c.C10T:p.Q4X	SRP159481	Mammary Tumor
SRR7781065-SRR7781064	chr12	43556080	43556080	T	A	DOP1A	Nonsense_Mutation	ENSCAFT00000075245.1	exon19	c.T4098A	p.Y1366X	SNP	exonic	DOP1A		stopgain	DOP1A:ENSCAFT00000075245.1:exon19:c.T4098A:p.Y1366X,DOP1A:ENSCAFT00000004651.4:exon20:c.T4128A:p.Y1376X,DOP1A:ENSCAFT00000004654.5:exon20:c.T4128A:p.Y1376X	SRP159481	Mammary Tumor
SRR7781065-SRR7781064	chr20	45204707	45204707	C	T	UNC13A	Nonsense_Mutation	ENSCAFT00000060269.1	exon8	c.C1039T	p.R347X	SNP	exonic	UNC13A		stopgain	UNC13A:ENSCAFT00000060269.1:exon8:c.C1039T:p.R347X,UNC13A:ENSCAFT00000003222.4:exon9:c.C1345T:p.R449X,UNC13A:ENSCAFT00000060488.1:exon9:c.C1039T:p.R347X,UNC13A:ENSCAFT00000085904.1:exon9:c.C1345T:p.R449X,UNC13A:ENSCAFT00000090942.1:exon9:c.C1078T:p.R360X,UNC13A:ENSCAFT00000091095.1:exon9:c.C1105T:p.R369X	SRP159481	Mammary Tumor
SRR7781065-SRR7781064	chr30	5710329	5710329	A	T	SPRED1	Nonsense_Mutation	ENSCAFT00000079985.1	exon6	c.A853T	p.K285X	SNP	exonic	SPRED1		stopgain	SPRED1:ENSCAFT00000079985.1:exon6:c.A853T:p.K285X,SPRED1:ENSCAFT00000087012.1:exon6:c.A745T:p.K249X,SPRED1:ENSCAFT00000013709.4:exon7:c.A847T:p.K283X	SRP159481	Mammary Tumor
SRR7781065-SRR7781064	chr30	9666009	9666009	G	A	CDAN1	Nonsense_Mutation	ENSCAFT00000017777.5	exon8	c.C1291T	p.Q431X	SNP	exonic	CDAN1		stopgain	CDAN1:ENSCAFT00000017777.5:exon8:c.C1291T:p.Q431X	SRP159481	Mammary Tumor
SRR7781065-SRR7781064	chr31	8524643	8524643	G	A	ROBO1	Nonsense_Mutation	ENSCAFT00000062604.1	exon10	c.G1490A	p.W497X	SNP	exonic	ROBO1		stopgain	ROBO1:ENSCAFT00000062604.1:exon10:c.G1490A:p.W497X,ROBO1:ENSCAFT00000067688.1:exon10:c.G1490A:p.W497X,ROBO1:ENSCAFT00000089355.1:exon10:c.G1703A:p.W568X,ROBO1:ENSCAFT00000012668.4:exon11:c.G1607A:p.W536X,ROBO1:ENSCAFT00000068389.1:exon11:c.G1250A:p.W417X,ROBO1:ENSCAFT00000076783.1:exon11:c.G1499A:p.W500X	SRP159481	Mammary Tumor
SRR7781065-SRR7781064	chr6	36531687	36531687	C	T	PPL	Nonsense_Mutation	ENSCAFT00000078356.1	exon13	c.C1519T	p.Q507X	SNP	exonic	PPL		stopgain	PPL:ENSCAFT00000078356.1:exon13:c.C1519T:p.Q507X,PPL:ENSCAFT00000030386.4:exon14:c.C1570T:p.Q524X,PPL:ENSCAFT00000044545.3:exon14:c.C1615T:p.Q539X,PPL:ENSCAFT00000072089.1:exon14:c.C1615T:p.Q539X,PPL:ENSCAFT00000076192.1:exon14:c.C1615T:p.Q539X,PPL:ENSCAFT00000087853.1:exon14:c.C1615T:p.Q539X,PPL:ENSCAFT00000091862.1:exon14:c.C1609T:p.Q537X	SRP159481	Mammary Tumor
SRR7781067-SRR7781066	chr10	68162036	68162036	G	A	AAK1	Nonsense_Mutation	ENSCAFT00000047415.2	exon1	c.C421T	p.Q141X	SNP	exonic	AAK1		stopgain	AAK1:ENSCAFT00000047415.2:exon1:c.C421T:p.Q141X	SRP159481	Mammary Tumor
SRR7781067-SRR7781066	chr17	800626	800626	G	A	TPO	Nonsense_Mutation	ENSCAFT00000067294.1	exon10	c.G1295A	p.W432X	SNP	exonic	TPO		stopgain	TPO:ENSCAFT00000067294.1:exon10:c.G1295A:p.W432X,TPO:ENSCAFT00000005172.4:exon11:c.G1805A:p.W602X	SRP159481	Mammary Tumor
SRR7781067-SRR7781066	chr18	42395752	42395752	C	T	PACSIN3	Nonsense_Mutation	ENSCAFT00000014094.4	exon4	c.C877T	p.Q293X	SNP	exonic	PACSIN3		stopgain	PACSIN3:ENSCAFT00000014094.4:exon4:c.C877T:p.Q293X,PACSIN3:ENSCAFT00000014088.5:exon5:c.C418T:p.Q140X	SRP159481	Mammary Tumor
SRR7781067-SRR7781066	chr5	32563719	32563719	G	A	TP53	Nonsense_Mutation	ENSCAFT00000086831.1	exon4	c.C532T	p.R178X	SNP	exonic	TP53		stopgain	TP53:ENSCAFT00000086831.1:exon4:c.C532T:p.R178X,TP53:ENSCAFT00000026465.4:exon6:c.C601T:p.R201X,TP53:ENSCAFT00000081814.1:exon6:c.C793T:p.R265X	SRP159481	Mammary Tumor
SRR7781068-SRR7780961	chr14	4953615	4953615	C	A	PLXNA4	Nonsense_Mutation	ENSCAFT00000002128.4	exon4	c.C1490A	p.S497X	SNP	exonic	PLXNA4		stopgain	PLXNA4:ENSCAFT00000002128.4:exon4:c.C1490A:p.S497X,PLXNA4:ENSCAFT00000089067.1:exon4:c.C1490A:p.S497X	SRP159481	Mammary Tumor
SRR7781068-SRR7780961	chr14	20000726	20000726	T	G	CASD1	Nonsense_Mutation	ENSCAFT00000003314.4	exon7	c.T821G	p.L274X	SNP	exonic	CASD1		stopgain	CASD1:ENSCAFT00000003314.4:exon7:c.T821G:p.L274X	SRP159481	Mammary Tumor
SRR7781068-SRR7780961	chr23	8939853	8939853	C	A	CX3CR1	Nonsense_Mutation	ENSCAFT00000046656.2	exon2	c.G229T	p.G77X	SNP	exonic	CX3CR1		stopgain	CX3CR1:ENSCAFT00000046656.2:exon2:c.G229T:p.G77X	SRP159481	Mammary Tumor
SRR7781092-SRR7781091	chr21	24916477	24916477	G	T	ARHGEF17	Nonsense_Mutation	ENSCAFT00000009046.4	exon2	c.C3189A	p.C1063X	SNP	exonic	ARHGEF17		stopgain	ARHGEF17:ENSCAFT00000009046.4:exon2:c.C3189A:p.C1063X	SRP159481	Mammary Tumor
SRR7781104-SRR7781103	chr1	35975481	35975481	G	T	UTRN	Nonsense_Mutation	ENSCAFT00000077376.1	exon49	c.G6829T	p.E2277X	SNP	exonic	UTRN		stopgain	UTRN:ENSCAFT00000077376.1:exon49:c.G6829T:p.E2277X,UTRN:ENSCAFT00000000501.5:exon50:c.G6808T:p.E2270X,UTRN:ENSCAFT00000044228.3:exon50:c.G6829T:p.E2277X	SRP159481	Mammary Tumor
SRR7781106-SRR7781105	chr6	38959443	38959443	G	A	TRAF7	Nonsense_Mutation	ENSCAFT00000030902.5	exon8	c.C898T	p.Q300X	SNP	exonic	TRAF7		stopgain	TRAF7:ENSCAFT00000030902.5:exon8:c.C898T:p.Q300X,TRAF7:ENSCAFT00000080665.1:exon8:c.C898T:p.Q300X,TRAF7:ENSCAFT00000073634.1:exon10:c.C850T:p.Q284X	SRP159481	Mammary Tumor
SRR7781106-SRR7781105	chr9	24010271	24010271	C	T	KPNB1	Nonsense_Mutation	ENSCAFT00000026424.4	exon4	c.C394T	p.Q132X	SNP	exonic	KPNB1		stopgain	KPNB1:ENSCAFT00000026424.4:exon4:c.C394T:p.Q132X,KPNB1:ENSCAFT00000087028.1:exon4:c.C394T:p.Q132X	SRP159481	Mammary Tumor
SRR7781108-SRR7781107	chr17	35650583	35650583	G	T	BCL2L11	Nonsense_Mutation	ENSCAFT00000045409.2	exon3	c.G466T	p.E156X	SNP	exonic	BCL2L11		stopgain	BCL2L11:ENSCAFT00000045409.2:exon3:c.G466T:p.E156X,BCL2L11:ENSCAFT00000059636.1:exon3:c.G466T:p.E156X,BCL2L11:ENSCAFT00000091416.1:exon3:c.G208T:p.E70X,BCL2L11:ENSCAFT00000078148.1:exon4:c.G781T:p.E261X	SRP159481	Mammary Tumor
SRR7781108-SRR7781107	chr38	23017616	23017616	C	T	OR6K5	Nonsense_Mutation	ENSCAFT00000018526.4	exon1	c.C919T	p.R307X	SNP	exonic	OR6K5		stopgain	OR6K5:ENSCAFT00000018526.4:exon1:c.C919T:p.R307X	SRP159481	Mammary Tumor
SRR9911342-SRR9911343	chr6	70746684	70746684	C	A	MSH4	Nonsense_Mutation	ENSCAFT00000037908.3	exon20	c.G2776T	p.E926X	SNP	exonic	MSH4		stopgain	MSH4:ENSCAFT00000037908.3:exon20:c.G2776T:p.E926X	PRJNA552905	Mammary Tumor
SRR9911348-SRR9911349	chr37	26054065	26054065	C	A	TMEM198	Nonsense_Mutation	ENSCAFT00000024744.3	exon2	c.C102A	p.Y34X	SNP	exonic	TMEM198		stopgain	TMEM198:ENSCAFT00000024744.3:exon2:c.C102A:p.Y34X	PRJNA552905	Mammary Tumor
SRR9911348-SRR9911349	chr8	41669135	41669135	C	A	RDH11	Translation_Start_Site	ENSCAFT00000026059.4	exon1	c.G3T	p.K1N	SNP	exonic	RDH11		startloss	RDH11:ENSCAFT00000026059.4:exon1:c.G3T:p.K1N,RDH11:ENSCAFT00000088377.1:exon1:c.G3T:p.K1N	PRJNA552905	Mammary Tumor
SRR9911352-SRR9911353	chr14	5017089	5017089	C	A	PLXNA4	Nonsense_Mutation	ENSCAFT00000002128.4	exon7	c.C1833A	p.C611X	SNP	exonic	PLXNA4		stopgain	PLXNA4:ENSCAFT00000002128.4:exon7:c.C1833A:p.C611X,PLXNA4:ENSCAFT00000089067.1:exon7:c.C1833A:p.C611X	PRJNA552905	Mammary Tumor
SRR9911352-SRR9911353	chr18	54900010	54900010	C	T	SYT7	Nonsense_Mutation	ENSCAFT00000063741.1	exon5	c.C424T	p.R142X	SNP	exonic	SYT7		stopgain	SYT7:ENSCAFT00000063741.1:exon5:c.C424T:p.R142X,SYT7:ENSCAFT00000085862.1:exon5:c.C1018T:p.R340X,SYT7:ENSCAFT00000025578.3:exon6:c.C1150T:p.R384X,SYT7:ENSCAFT00000025580.5:exon6:c.C1150T:p.R384X	PRJNA552905	Mammary Tumor
SRR9911354-SRR9911355	chr1	23912837	23912837	T	A	SMAD4	Nonsense_Mutation	ENSCAFT00000000266.4	exon2	c.A328T	p.K110X	SNP	exonic	SMAD4		stopgain	SMAD4:ENSCAFT00000000266.4:exon2:c.A328T:p.K110X,SMAD4:ENSCAFT00000061940.1:exon3:c.A328T:p.K110X,SMAD4:ENSCAFT00000082853.1:exon3:c.A328T:p.K110X	PRJNA552905	Mammary Tumor
SRR9911354-SRR9911355	chr5	15119336	15119336	G	A	PHLDB1	Nonsense_Mutation	ENSCAFT00000019942.5	exon5	c.C901T	p.R301X	SNP	exonic	PHLDB1		stopgain	PHLDB1:ENSCAFT00000019942.5:exon5:c.C901T:p.R301X,PHLDB1:ENSCAFT00000019945.4:exon5:c.C901T:p.R301X,PHLDB1:ENSCAFT00000091438.1:exon5:c.C541T:p.R181X,PHLDB1:ENSCAFT00000063695.1:exon6:c.C967T:p.R323X,PHLDB1:ENSCAFT00000070044.1:exon6:c.C967T:p.R323X,PHLDB1:ENSCAFT00000074417.1:exon6:c.C967T:p.R323X,PHLDB1:ENSCAFT00000078707.1:exon6:c.C967T:p.R323X,PHLDB1:ENSCAFT00000091804.1:exon6:c.C967T:p.R323X	PRJNA552905	Mammary Tumor
SRR9911357-SRR9911358	chr38	1617937	1617937	C	A	RBBP5	Nonsense_Mutation	ENSCAFT00000046238.2	exon9	c.G1132T	p.E378X	SNP	exonic	RBBP5		stopgain	RBBP5:ENSCAFT00000046238.2:exon9:c.G1132T:p.E378X,RBBP5:ENSCAFT00000015870.5:exon10:c.G1087T:p.E363X	PRJNA552905	Mammary Tumor
SRR9911357-SRR9911358	chr9	59970209	59970209	C	A	OR1K1	Nonsense_Mutation	ENSCAFT00000032261.2	exon1	c.G607T	p.E203X	SNP	exonic	OR1K1		stopgain	OR1K1:ENSCAFT00000032261.2:exon1:c.G607T:p.E203X	PRJNA552905	Mammary Tumor
SRR9911363-SRR9911364	chr14	7725660	7725660	G	A	IRF5	Nonsense_Mutation	ENSCAFT00000078002.1	exon6	c.C727T	p.Q243X	SNP	exonic	IRF5		stopgain	IRF5:ENSCAFT00000078002.1:exon6:c.C727T:p.Q243X,IRF5:ENSCAFT00000092796.1:exon6:c.C1003T:p.Q335X,IRF5:ENSCAFT00000002526.3:exon7:c.C1300T:p.Q434X,IRF5:ENSCAFT00000002528.5:exon7:c.C1042T:p.Q348X	PRJNA552905	Mammary Tumor
SRR9911365-SRR9911366	chr1	109778999	109778999	C	A	SYMPK	Nonsense_Mutation	ENSCAFT00000007040.4	exon12	c.C1481A	p.S494X	SNP	exonic	SYMPK		stopgain	SYMPK:ENSCAFT00000007040.4:exon12:c.C1481A:p.S494X	PRJNA552905	Mammary Tumor
SRR9911373-SRR9911372	chr22	1941452	1941452	T	A	SPRYD7	Nonsense_Mutation	ENSCAFT00000006916.4	exon8	c.T528A	p.Y176X	SNP	exonic	SPRYD7		stopgain	SPRYD7:ENSCAFT00000006916.4:exon8:c.T528A:p.Y176X	PRJNA552905	Mammary Tumor
SRR9911375-SRR9911374	chr5	33035861	33035861	G	A	CTC1	Nonsense_Mutation	ENSCAFT00000083773.1	exon16	c.C2956T	p.R986X	SNP	exonic	CTC1		stopgain	CTC1:ENSCAFT00000083773.1:exon16:c.C2956T:p.R986X,CTC1:ENSCAFT00000026946.4:exon17:c.C2881T:p.R961X,CTC1:ENSCAFT00000089666.1:exon17:c.C2893T:p.R965X,CTC1:ENSCAFT00000089846.1:exon17:c.C2893T:p.R965X	PRJNA552905	Mammary Tumor
SRR9911375-SRR9911374	chr5	82554995	82554995	C	A	DYNC1LI2	Nonsense_Mutation	ENSCAFT00000047770.2	exon4	c.C447A	p.C149X	SNP	exonic	DYNC1LI2		stopgain	DYNC1LI2:ENSCAFT00000047770.2:exon4:c.C447A:p.C149X,DYNC1LI2:ENSCAFT00000032501.5:exon5:c.C678A:p.C226X	PRJNA552905	Mammary Tumor
SRR9911377-SRR9911376	chr1	58959660	58959660	G	A	FAM184A	Nonsense_Mutation	ENSCAFT00000064545.1	exon5	c.C1450T	p.Q484X	SNP	exonic	FAM184A		stopgain	FAM184A:ENSCAFT00000064545.1:exon5:c.C1450T:p.Q484X,FAM184A:ENSCAFT00000001461.4:exon6:c.C1648T:p.Q550X,FAM184A:ENSCAFT00000001463.5:exon6:c.C1648T:p.Q550X,FAM184A:ENSCAFT00000066131.1:exon6:c.C1648T:p.Q550X,FAM184A:ENSCAFT00000066563.1:exon6:c.C1648T:p.Q550X,FAM184A:ENSCAFT00000067347.1:exon6:c.C1648T:p.Q550X,FAM184A:ENSCAFT00000069951.1:exon6:c.C1648T:p.Q550X,FAM184A:ENSCAFT00000092580.1:exon6:…	PRJNA552905	Mammary Tumor
SRR9911377-SRR9911376	chr18	51044532	51044532	C	A	KLC2	Nonsense_Mutation	ENSCAFT00000066052.1	exon1	c.G220T	p.E74X	SNP	exonic	KLC2		stopgain	KLC2:ENSCAFT00000066052.1:exon1:c.G220T:p.E74X,KLC2:ENSCAFT00000020513.4:exon2:c.G220T:p.E74X	PRJNA552905	Mammary Tumor
SRR9911379-SRR9911378	chr21	7720602	7720602	C	A	FAT3	Nonsense_Mutation	ENSCAFT00000006830.5	exon23	c.G12805T	p.E4269X	SNP	exonic	FAT3		stopgain	FAT3:ENSCAFT00000006830.5:exon23:c.G12805T:p.E4269X,FAT3:ENSCAFT00000006831.4:exon23:c.G12805T:p.E4269X,FAT3:ENSCAFT00000093203.1:exon24:c.G12874T:p.E4292X	PRJNA552905	Mammary Tumor
SRR9911380-SRR9911367	chr16	16001945	16001945	T	A	KMT2C	Nonsense_Mutation	ENSCAFT00000007959.6	exon38	c.A8248T	p.K2750X	SNP	exonic	KMT2C		stopgain	KMT2C:ENSCAFT00000007959.6:exon38:c.A8248T:p.K2750X	PRJNA552905	Mammary Tumor
SRR9911380-SRR9911367	chr9	15743781	15743781	A	T	ABCA5	Nonsense_Mutation	ENSCAFT00000017260.4	exon15	c.T1944A	p.C648X	SNP	exonic	ABCA5		stopgain	ABCA5:ENSCAFT00000017260.4:exon15:c.T1944A:p.C648X,ABCA5:ENSCAFT00000069832.1:exon15:c.T1944A:p.C648X,ABCA5:ENSCAFT00000076821.1:exon15:c.T1968A:p.C656X	PRJNA552905	Mammary Tumor
SRR9911381-SRR9911368	chr17	15995436	15995436	C	A	TDRD15	Nonsense_Mutation	ENSCAFT00000045655.2	exon1	c.C2910A	p.Y970X	SNP	exonic	TDRD15		stopgain	TDRD15:ENSCAFT00000045655.2:exon1:c.C2910A:p.Y970X,TDRD15:ENSCAFT00000085468.1:exon3:c.C2955A:p.Y985X	PRJNA552905	Mammary Tumor
SRR9911381-SRR9911368	chr33	18541780	18541780	G	T	ZBTB20	Nonsense_Mutation	ENSCAFT00000017209.4	exon3	c.C734A	p.S245X	SNP	exonic	ZBTB20		stopgain	ZBTB20:ENSCAFT00000017209.4:exon3:c.C734A:p.S245X,ZBTB20:ENSCAFT00000092470.1:exon4:c.C725A:p.S242X	PRJNA552905	Mammary Tumor
SRR9911381-SRR9911368	chr33	18541782	18541782	G	T	ZBTB20	Nonsense_Mutation	ENSCAFT00000017209.4	exon3	c.C732A	p.Y244X	SNP	exonic	ZBTB20		stopgain	ZBTB20:ENSCAFT00000017209.4:exon3:c.C732A:p.Y244X,ZBTB20:ENSCAFT00000092470.1:exon4:c.C723A:p.Y241X	PRJNA552905	Mammary Tumor
SRR7780731-SRR7780732	chr19	49718736	49718736	C	G	ACVR2A	Missense_Mutation	ENSCAFT00000075724.1	exon7	c.C1766G	p.A589G	SNP	exonic	ACVR2A		nonsynonymous SNV	ACVR2A:ENSCAFT00000075724.1:exon7:c.C1766G:p.A589G,ACVR2A:ENSCAFT00000008888.4:exon10:c.C1100G:p.A367G,ACVR2A:ENSCAFT00000081141.1:exon11:c.C1124G:p.A375G	SRP159481	Mammary Tumor
SRR7780731-SRR7780732	chr2	59328447	59328447	G	A	NLRC5	Missense_Mutation	ENSCAFT00000014230.4	exon4	c.C1769T	p.A590V	SNP	exonic	NLRC5		nonsynonymous SNV	NLRC5:ENSCAFT00000014230.4:exon4:c.C1769T:p.A590V,NLRC5:ENSCAFT00000059964.1:exon4:c.C1829T:p.A610V,NLRC5:ENSCAFT00000060465.1:exon4:c.C1829T:p.A610V,NLRC5:ENSCAFT00000064277.1:exon4:c.C1829T:p.A610V,NLRC5:ENSCAFT00000072274.1:exon4:c.C1829T:p.A610V,NLRC5:ENSCAFT00000072910.1:exon4:c.C1769T:p.A590V,NLRC5:ENSCAFT00000079308.1:exon4:c.C1829T:p.A610V,NLRC5:ENSCAFT00000079386.1:exon4:c.C1829T:p.A610V…	SRP159481	Mammary Tumor
SRR7780731-SRR7780732	chr34	12675674	12675674	A	G	PIK3CA	Missense_Mutation	ENSCAFT00000080543.1	exon20	c.A3140G	p.H1047R	SNP	exonic	PIK3CA		nonsynonymous SNV	PIK3CA:ENSCAFT00000080543.1:exon20:c.A3140G:p.H1047R	SRP159481	Mammary Tumor
SRR7780731-SRR7780732	chr36	8920384	8920384	G	A	FIGN	Missense_Mutation	ENSCAFT00000016718.4	exon5	c.C1922T	p.A641V	SNP	exonic	FIGN		nonsynonymous SNV	FIGN:ENSCAFT00000016718.4:exon5:c.C1922T:p.A641V	SRP159481	Mammary Tumor
SRR7780731-SRR7780732	chr9	248905	248905	C	T	FASN	Missense_Mutation	ENSCAFT00000009737.4	exon39	c.C7250T	p.T2417M	SNP	exonic	FASN		nonsynonymous SNV	FASN:ENSCAFT00000009737.4:exon39:c.C7250T:p.T2417M	SRP159481	Mammary Tumor
SRR7780731-SRR7780732	chr1	121877061	121877061	T	C	VSTM2B	Missense_Mutation	ENSCAFT00000012197.4	exon3	c.A461G	p.H154R	SNP	exonic	VSTM2B		nonsynonymous SNV	VSTM2B:ENSCAFT00000012197.4:exon3:c.A461G:p.H154R,VSTM2B:ENSCAFT00000085886.1:exon3:c.A662G:p.H221R,VSTM2B:ENSCAFT00000071234.1:exon4:c.A569G:p.H190R	SRP159481	Mammary Tumor
SRR7780731-SRR7780732	chr1	121877065	121877065	T	C	VSTM2B	Missense_Mutation	ENSCAFT00000012197.4	exon3	c.A457G	p.S153G	SNP	exonic	VSTM2B		nonsynonymous SNV	VSTM2B:ENSCAFT00000012197.4:exon3:c.A457G:p.S153G,VSTM2B:ENSCAFT00000085886.1:exon3:c.A658G:p.S220G,VSTM2B:ENSCAFT00000071234.1:exon4:c.A565G:p.S189G	SRP159481	Mammary Tumor
SRR7780733-SRR7780734	chr1	19082402	19082402	C	T	WDR7	Missense_Mutation	ENSCAFT00000090720.1	exon11	c.G1630A	p.D544N	SNP	exonic	WDR7		nonsynonymous SNV	WDR7:ENSCAFT00000090720.1:exon11:c.G1630A:p.D544N,WDR7:ENSCAFT00000092862.1:exon11:c.G1645A:p.D549N,WDR7:ENSCAFT00000000221.4:exon13:c.G1882A:p.D628N,WDR7:ENSCAFT00000075501.1:exon14:c.G2002A:p.D668N,WDR7:ENSCAFT00000089787.1:exon14:c.G2002A:p.D668N,WDR7:ENSCAFT00000000223.5:exon15:c.G2023A:p.D675N	SRP159481	Mammary Tumor
SRR7780733-SRR7780734	chr10	35108385	35108385	G	A	RANBP2	Missense_Mutation	ENSCAFT00000061866.1	exon18	c.C3430T	p.L1144F	SNP	exonic	RANBP2		nonsynonymous SNV	RANBP2:ENSCAFT00000061866.1:exon18:c.C3430T:p.L1144F,RANBP2:ENSCAFT00000061256.1:exon20:c.C6601T:p.L2201F,RANBP2:ENSCAFT00000093512.1:exon20:c.C6601T:p.L2201F,RANBP2:ENSCAFT00000003160.4:exon21:c.C6442T:p.L2148F,RANBP2:ENSCAFT00000066512.1:exon21:c.C6550T:p.L2184F	SRP159481	Mammary Tumor
SRR7780733-SRR7780734	chr10	45364601	45364601	C	T	OXER1	Missense_Mutation	ENSCAFT00000003830.4	exon1	c.G874A	p.V292I	SNP	exonic	OXER1		nonsynonymous SNV	OXER1:ENSCAFT00000003830.4:exon1:c.G874A:p.V292I	SRP159481	Mammary Tumor
SRR7780733-SRR7780734	chr12	33034595	33034595	G	A	FAM135A	Missense_Mutation	ENSCAFT00000077083.1	exon10	c.G2134A	p.D712N	SNP	exonic	FAM135A		nonsynonymous SNV	FAM135A:ENSCAFT00000077083.1:exon10:c.G2134A:p.D712N,FAM135A:ENSCAFT00000083584.1:exon12:c.G2143A:p.D715N,FAM135A:ENSCAFT00000091281.1:exon13:c.G2884A:p.D962N,FAM135A:ENSCAFT00000092093.1:exon13:c.G2287A:p.D763N,FAM135A:ENSCAFT00000004092.5:exon15:c.G2782A:p.D928N,FAM135A:ENSCAFT00000092597.1:exon15:c.G2098A:p.D700N,FAM135A:ENSCAFT00000062090.1:exon16:c.G2860A:p.D954N,FAM135A:ENSCAFT00000086696.1…	SRP159481	Mammary Tumor
SRR7780733-SRR7780734	chr13	21753573	21753573	C	A	NTAQ1	Missense_Mutation	ENSCAFT00000001548.4	exon5	c.C446A	p.S149Y	SNP	exonic	NTAQ1		nonsynonymous SNV	NTAQ1:ENSCAFT00000001548.4:exon5:c.C446A:p.S149Y,NTAQ1:ENSCAFT00000065175.1:exon5:c.C446A:p.S149Y,NTAQ1:ENSCAFT00000069264.1:exon5:c.C446A:p.S149Y,NTAQ1:ENSCAFT00000044873.3:exon7:c.C455A:p.S152Y	SRP159481	Mammary Tumor
SRR7780733-SRR7780734	chr13	33739047	33739047	G	A	COL22A1	Missense_Mutation	ENSCAFT00000001823.5	exon54	c.C3725T	p.A1242V	SNP	exonic	COL22A1		nonsynonymous SNV	COL22A1:ENSCAFT00000001823.5:exon54:c.C3725T:p.A1242V	SRP159481	Mammary Tumor
SRR7780733-SRR7780734	chr2	59733969	59733969	C	T	OGFOD1	Missense_Mutation	ENSCAFT00000014574.4	exon2	c.G244A	p.E82K	SNP	exonic	OGFOD1		nonsynonymous SNV	OGFOD1:ENSCAFT00000014574.4:exon2:c.G244A:p.E82K,OGFOD1:ENSCAFT00000072790.1:exon2:c.G244A:p.E82K,OGFOD1:ENSCAFT00000082602.1:exon2:c.G244A:p.E82K	SRP159481	Mammary Tumor
SRR7780733-SRR7780734	chr24	11906886	11906886	G	A	MKKS	Missense_Mutation	ENSCAFT00000009098.4	exon3	c.G590A	p.G197E	SNP	exonic	MKKS		nonsynonymous SNV	MKKS:ENSCAFT00000009098.4:exon3:c.G590A:p.G197E,MKKS:ENSCAFT00000092169.1:exon3:c.G590A:p.G197E	SRP159481	Mammary Tumor
SRR7780733-SRR7780734	chr25	7772673	7772673	T	A	BRCA2	Missense_Mutation	ENSCAFT00000073872.1	exon7	c.A4391T	p.E1464V	SNP	exonic	BRCA2		nonsynonymous SNV	BRCA2:ENSCAFT00000073872.1:exon7:c.A4391T:p.E1464V,BRCA2:ENSCAFT00000080826.1:exon9:c.A4547T:p.E1516V,BRCA2:ENSCAFT00000010309.4:exon11:c.A4778T:p.E1593V,BRCA2:ENSCAFT00000080793.1:exon11:c.A4778T:p.E1593V,BRCA2:ENSCAFT00000086998.1:exon11:c.A4778T:p.E1593V,BRCA2:ENSCAFT00000092030.1:exon11:c.A4685T:p.E1562V	SRP159481	Mammary Tumor
SRR7780733-SRR7780734	chr25	15271560	15271560	G	A	SACS	Missense_Mutation	ENSCAFT00000075502.1	exon6	c.G1048A	p.G350R	SNP	exonic	SACS		nonsynonymous SNV	SACS:ENSCAFT00000075502.1:exon6:c.G1048A:p.G350R,SACS:ENSCAFT00000066845.1:exon7:c.G1195A:p.G399R,SACS:ENSCAFT00000011468.4:exon8:c.G1204A:p.G402R	SRP159481	Mammary Tumor
SRR7780733-SRR7780734	chr26	30463502	30463502	T	C	P2RX6	Missense_Mutation	ENSCAFT00000045106.3	exon6	c.T577C	p.C193R	SNP	exonic	P2RX6		nonsynonymous SNV	P2RX6:ENSCAFT00000045106.3:exon6:c.T577C:p.C193R,P2RX6:ENSCAFT00000023919.4:exon7:c.T520C:p.C174R,P2RX6:ENSCAFT00000071547.1:exon8:c.T664C:p.C222R,P2RX6:ENSCAFT00000078857.1:exon8:c.T679C:p.C227R	SRP159481	Mammary Tumor
SRR7780733-SRR7780734	chr29	24833132	24833132	G	A	ZFHX4	Missense_Mutation	ENSCAFT00000013195.5	exon10	c.G5662A	p.E1888K	SNP	exonic	ZFHX4		nonsynonymous SNV	ZFHX4:ENSCAFT00000013195.5:exon10:c.G5662A:p.E1888K	SRP159481	Mammary Tumor
SRR7780733-SRR7780734	chr32	32405319	32405319	A	T	ZGRF1	Missense_Mutation	ENSCAFT00000018553.5	exon3	c.T1322A	p.V441E	SNP	exonic	ZGRF1		nonsynonymous SNV	ZGRF1:ENSCAFT00000018553.5:exon3:c.T1322A:p.V441E,ZGRF1:ENSCAFT00000044732.2:exon4:c.T1508A:p.V503E,ZGRF1:ENSCAFT00000018567.5:exon5:c.T1568A:p.V523E,ZGRF1:ENSCAFT00000045458.3:exon5:c.T1568A:p.V523E	SRP159481	Mammary Tumor
SRR7780733-SRR7780734	chr35	16988793	16988793	G	C	KDM1B	Missense_Mutation	ENSCAFT00000072937.1	exon7	c.G768C	p.L256F	SNP	exonic	KDM1B		nonsynonymous SNV	KDM1B:ENSCAFT00000072937.1:exon7:c.G768C:p.L256F,KDM1B:ENSCAFT00000078868.1:exon8:c.G807C:p.L269F,KDM1B:ENSCAFT00000016165.5:exon9:c.G1065C:p.L355F,KDM1B:ENSCAFT00000045627.3:exon9:c.G924C:p.L308F,KDM1B:ENSCAFT00000059851.1:exon9:c.G924C:p.L308F,KDM1B:ENSCAFT00000084332.1:exon9:c.G924C:p.L308F,KDM1B:ENSCAFT00000087533.1:exon9:c.G924C:p.L308F	SRP159481	Mammary Tumor
SRR7780733-SRR7780734	chr5	22480039	22480039	C	T	FDX1	Missense_Mutation	ENSCAFT00000022588.4	exon2	c.G181A	p.G61S	SNP	exonic	FDX1		nonsynonymous SNV	FDX1:ENSCAFT00000022588.4:exon2:c.G181A:p.G61S	SRP159481	Mammary Tumor
SRR7780733-SRR7780734	chr5	36739695	36739695	C	G	MYOCD	Missense_Mutation	ENSCAFT00000028347.4	exon6	c.C490G	p.P164A	SNP	exonic	MYOCD		nonsynonymous SNV	MYOCD:ENSCAFT00000028347.4:exon6:c.C490G:p.P164A,MYOCD:ENSCAFT00000028351.4:exon6:c.C490G:p.P164A	SRP159481	Mammary Tumor
SRR7780735-SRR7780736	chr10	26686727	26686727	A	G	SOX10	Missense_Mutation	ENSCAFT00000002231.4	exon2	c.A626G	p.Y209C	SNP	exonic	SOX10		nonsynonymous SNV	SOX10:ENSCAFT00000002231.4:exon2:c.A626G:p.Y209C	SRP159481	Mammary Tumor
SRR7780735-SRR7780736	chr16	14578364	14578364	G	T	SSPO	Missense_Mutation	ENSCAFT00000044018.2	exon60	c.G9165T	p.E3055D	SNP	exonic	SSPO		nonsynonymous SNV	SSPO:ENSCAFT00000044018.2:exon60:c.G9165T:p.E3055D	SRP159481	Mammary Tumor
SRR7780735-SRR7780736	chr2	81682370	81682370	T	G	ZBTB17	Missense_Mutation	ENSCAFT00000025572.4	exon14	c.T2096G	p.V699G	SNP	exonic	ZBTB17		nonsynonymous SNV	ZBTB17:ENSCAFT00000025572.4:exon14:c.T2096G:p.V699G,ZBTB17:ENSCAFT00000087323.1:exon15:c.T2087G:p.V696G	SRP159481	Mammary Tumor
SRR7780735-SRR7780736	chr25	11855030	11855030	C	T	GSX1	Missense_Mutation	ENSCAFT00000010870.4	exon1	c.G410A	p.C137Y	SNP	exonic	GSX1		nonsynonymous SNV	GSX1:ENSCAFT00000010870.4:exon1:c.G410A:p.C137Y	SRP159481	Mammary Tumor
SRR7780737-SRR7780738	chr1	102262463	102262463	G	C	SHISA7	Missense_Mutation	ENSCAFT00000045226.3	exon3	c.G506C	p.R169P	SNP	exonic	SHISA7		nonsynonymous SNV	SHISA7:ENSCAFT00000045226.3:exon3:c.G506C:p.R169P,SHISA7:ENSCAFT00000049048.2:exon3:c.G506C:p.R169P	SRP159481	Mammary Tumor
SRR7780737-SRR7780738	chr12	59989654	59989654	C	T	GRIK2	Missense_Mutation	ENSCAFT00000005766.5	exon15	c.C2473T	p.R825W	SNP	exonic	GRIK2		nonsynonymous SNV	GRIK2:ENSCAFT00000005766.5:exon15:c.C2473T:p.R825W,GRIK2:ENSCAFT00000005767.4:exon16:c.C2620T:p.R874W	SRP159481	Mammary Tumor
SRR7780737-SRR7780738	chr26	7028555	7028555	A	T	CLIP1	Missense_Mutation	ENSCAFT00000012621.4	exon8	c.A1325T	p.Q442L	SNP	exonic	CLIP1		nonsynonymous SNV	CLIP1:ENSCAFT00000012621.4:exon8:c.A1325T:p.Q442L,CLIP1:ENSCAFT00000012632.5:exon8:c.A1325T:p.Q442L,CLIP1:ENSCAFT00000060726.1:exon8:c.A1325T:p.Q442L,CLIP1:ENSCAFT00000067532.1:exon8:c.A1325T:p.Q442L,CLIP1:ENSCAFT00000070295.1:exon8:c.A1325T:p.Q442L,CLIP1:ENSCAFT00000080864.1:exon8:c.A1325T:p.Q442L	SRP159481	Mammary Tumor
SRR7780737-SRR7780738	chr27	42484035	42484035	G	A	CCDC77	Missense_Mutation	ENSCAFT00000045047.2	exon6	c.G610A	p.V204I	SNP	exonic	CCDC77		nonsynonymous SNV	CCDC77:ENSCAFT00000045047.2:exon6:c.G610A:p.V204I,CCDC77:ENSCAFT00000025012.4:exon7:c.G610A:p.V204I,CCDC77:ENSCAFT00000047981.3:exon7:c.G610A:p.V204I	SRP159481	Mammary Tumor
SRR7780737-SRR7780738	chr6	10355725	10355725	C	T	KPNA7	Missense_Mutation	ENSCAFT00000009656.4	exon9	c.C1003T	p.H335Y	SNP	exonic	KPNA7		nonsynonymous SNV	KPNA7:ENSCAFT00000009656.4:exon9:c.C1003T:p.H335Y	SRP159481	Mammary Tumor
SRR7780737-SRR7780738	chr7	16266831	16266831	G	C	DHX9	Missense_Mutation	ENSCAFT00000020976.5	exon8	c.G689C	p.R230P	SNP	exonic	DHX9		nonsynonymous SNV	DHX9:ENSCAFT00000020976.5:exon8:c.G689C:p.R230P	SRP159481	Mammary Tumor
SRR7780740-SRR7780739	chr1	102228747	102228747	G	C	ZNF628	Missense_Mutation	ENSCAFT00000047492.2	exon1	c.C35G	p.S12C	SNP	exonic	ZNF628		nonsynonymous SNV	ZNF628:ENSCAFT00000047492.2:exon1:c.C35G:p.S12C	SRP159481	Mammary Tumor
SRR7780740-SRR7780739	chr12	63982928	63982928	A	T	QRSL1	Missense_Mutation	ENSCAFT00000006001.4	exon4	c.A299T	p.Y100F	SNP	exonic	QRSL1		nonsynonymous SNV	QRSL1:ENSCAFT00000006001.4:exon4:c.A299T:p.Y100F	SRP159481	Mammary Tumor
SRR7780740-SRR7780739	chr13	26908409	26908409	G	C	GSDMC	Missense_Mutation	ENSCAFT00000001658.4	exon2	c.G303C	p.M101I	SNP	exonic	GSDMC		nonsynonymous SNV	GSDMC:ENSCAFT00000001658.4:exon2:c.G303C:p.M101I	SRP159481	Mammary Tumor
SRR7780740-SRR7780739	chr15	16729856	16729856	C	T	SZT2	Missense_Mutation	ENSCAFT00000061483.1	exon68	c.G10297A	p.D3433N	SNP	exonic	SZT2		nonsynonymous SNV	SZT2:ENSCAFT00000061483.1:exon68:c.G10297A:p.D3433N,SZT2:ENSCAFT00000008423.4:exon71:c.G10108A:p.D3370N,SZT2:ENSCAFT00000060367.1:exon71:c.G10030A:p.D3344N,SZT2:ENSCAFT00000072927.1:exon71:c.G10048A:p.D3350N,SZT2:ENSCAFT00000044106.3:exon72:c.G10201A:p.D3401N	SRP159481	Mammary Tumor
SRR7780740-SRR7780739	chr16	17973929	17973929	G	A	DPP6	Missense_Mutation	ENSCAFT00000075548.1	exon12	c.G1169A	p.R390Q	SNP	exonic	DPP6		nonsynonymous SNV	DPP6:ENSCAFT00000075548.1:exon12:c.G1169A:p.R390Q,DPP6:ENSCAFT00000008117.4:exon14:c.G1304A:p.R435Q,DPP6:ENSCAFT00000067975.1:exon14:c.G1304A:p.R435Q,DPP6:ENSCAFT00000074862.1:exon14:c.G1502A:p.R501Q	SRP159481	Mammary Tumor
SRR7780740-SRR7780739	chr20	48215603	48215603	A	T	ADGRE5	Missense_Mutation	ENSCAFT00000073012.1	exon2	c.T265A	p.Y89N	SNP	exonic	ADGRE5		nonsynonymous SNV	ADGRE5:ENSCAFT00000073012.1:exon2:c.T265A:p.Y89N,ADGRE5:ENSCAFT00000083134.1:exon2:c.T265A:p.Y89N,ADGRE5:ENSCAFT00000084997.1:exon2:c.T265A:p.Y89N,ADGRE5:ENSCAFT00000084389.1:exon3:c.T280A:p.Y94N,ADGRE5:ENSCAFT00000025974.4:exon4:c.T280A:p.Y94N,ADGRE5:ENSCAFT00000071026.1:exon4:c.T280A:p.Y94N,ADGRE5:ENSCAFT00000087150.1:exon4:c.T280A:p.Y94N	SRP159481	Mammary Tumor
SRR7780740-SRR7780739	chr20	53783252	53783252	G	A	PSPN	Missense_Mutation	ENSCAFT00000029669.4	exon1	c.G82A	p.G28R	SNP	exonic	PSPN		nonsynonymous SNV	PSPN:ENSCAFT00000029669.4:exon1:c.G82A:p.G28R	SRP159481	Mammary Tumor
SRR7780740-SRR7780739	chr21	27725043	27725043	C	T	OR52AB3	Missense_Mutation	ENSCAFT00000037231.3	exon1	c.C907T	p.R303C	SNP	exonic	OR52AB3		nonsynonymous SNV	OR52AB3:ENSCAFT00000037231.3:exon1:c.C907T:p.R303C	SRP159481	Mammary Tumor
SRR7780740-SRR7780739	chr26	28377783	28377783	G	A	CABIN1	Missense_Mutation	ENSCAFT00000022235.4	exon29	c.C4957T	p.R1653W	SNP	exonic	CABIN1		nonsynonymous SNV	CABIN1:ENSCAFT00000022235.4:exon29:c.C4957T:p.R1653W,CABIN1:ENSCAFT00000049789.3:exon32:c.C5524T:p.R1842W	SRP159481	Mammary Tumor
SRR7780740-SRR7780739	chr32	11190098	11190098	G	C	IBSP	Missense_Mutation	ENSCAFT00000063631.1	exon2	c.G20C	p.R7T	SNP	exonic	IBSP		nonsynonymous SNV	IBSP:ENSCAFT00000063631.1:exon2:c.G20C:p.R7T,IBSP:ENSCAFT00000015179.4:exon3:c.G74C:p.R25T	SRP159481	Mammary Tumor
SRR7780740-SRR7780739	chr5	32563409	32563409	C	G	TP53	Missense_Mutation	ENSCAFT00000086831.1	exon5	c.G620C	p.C207S	SNP	exonic	TP53		nonsynonymous SNV	TP53:ENSCAFT00000086831.1:exon5:c.G620C:p.C207S,TP53:ENSCAFT00000026465.4:exon7:c.G689C:p.C230S,TP53:ENSCAFT00000081814.1:exon7:c.G881C:p.C294S	SRP159481	Mammary Tumor
SRR7780740-SRR7780739	chr7	78442164	78442164	A	G	CEP192	Missense_Mutation	ENSCAFT00000029956.5	exon10	c.A1499G	p.Q500R	SNP	exonic	CEP192		nonsynonymous SNV	CEP192:ENSCAFT00000029956.5:exon10:c.A1499G:p.Q500R,CEP192:ENSCAFT00000029969.4:exon17:c.A998G:p.Q333R	SRP159481	Mammary Tumor
SRR7780742-SRR7780741	chr10	61584970	61584970	G	A	XPO1	Missense_Mutation	ENSCAFT00000004940.4	exon1	c.C79T	p.L27F	SNP	exonic	XPO1		nonsynonymous SNV	XPO1:ENSCAFT00000004940.4:exon1:c.C79T:p.L27F	SRP159481	Mammary Tumor
SRR7780742-SRR7780741	chr13	3925627	3925627	G	A	UBR5	Missense_Mutation	ENSCAFT00000047363.2	exon26	c.C3469T	p.R1157W	SNP	exonic	UBR5		nonsynonymous SNV	UBR5:ENSCAFT00000047363.2:exon26:c.C3469T:p.R1157W,UBR5:ENSCAFT00000061763.1:exon28:c.C3553T:p.R1185W,UBR5:ENSCAFT00000066469.1:exon28:c.C3577T:p.R1193W,UBR5:ENSCAFT00000078766.1:exon28:c.C3562T:p.R1188W,UBR5:ENSCAFT00000000972.5:exon29:c.C3673T:p.R1225W,UBR5:ENSCAFT00000063085.1:exon29:c.C3673T:p.R1225W,UBR5:ENSCAFT00000070195.1:exon29:c.C3673T:p.R1225W,UBR5:ENSCAFT00000071158.1:exon29:c.C3673T:…	SRP159481	Mammary Tumor
SRR7780742-SRR7780741	chr16	45456873	45456873	G	A	SLC25A4	Missense_Mutation	ENSCAFT00000012152.5	exon2	c.C260T	p.A87V	SNP	exonic	SLC25A4		nonsynonymous SNV	SLC25A4:ENSCAFT00000012152.5:exon2:c.C260T:p.A87V,SLC25A4:ENSCAFT00000048803.2:exon2:c.C260T:p.A87V,SLC25A4:ENSCAFT00000062599.1:exon2:c.C611T:p.A204V	SRP159481	Mammary Tumor
SRR7780742-SRR7780741	chr29	24690935	24690935	C	T	ZFHX4	Missense_Mutation	ENSCAFT00000013195.5	exon2	c.C1784T	p.P595L	SNP	exonic	ZFHX4		nonsynonymous SNV	ZFHX4:ENSCAFT00000013195.5:exon2:c.C1784T:p.P595L	SRP159481	Mammary Tumor
SRR7780742-SRR7780741	chr30	38442599	38442599	C	A	SNX33	Missense_Mutation	ENSCAFT00000028660.3	exon1	c.C892A	p.R298S	SNP	exonic	SNX33		nonsynonymous SNV	SNX33:ENSCAFT00000028660.3:exon1:c.C892A:p.R298S,SNX33:ENSCAFT00000076941.1:exon1:c.C892A:p.R298S	SRP159481	Mammary Tumor
SRR7780742-SRR7780741	chr34	12675674	12675674	A	G	PIK3CA	Missense_Mutation	ENSCAFT00000080543.1	exon20	c.A3140G	p.H1047R	SNP	exonic	PIK3CA		nonsynonymous SNV	PIK3CA:ENSCAFT00000080543.1:exon20:c.A3140G:p.H1047R	SRP159481	Mammary Tumor
SRR7780742-SRR7780741	chr4	53048923	53048923	G	A	HAVCR1	Missense_Mutation	ENSCAFT00000036042.3	exon2	c.G242A	p.R81H	SNP	exonic	HAVCR1		nonsynonymous SNV	HAVCR1:ENSCAFT00000036042.3:exon2:c.G242A:p.R81H,HAVCR1:ENSCAFT00000042810.3:exon2:c.G233A:p.R78H,HAVCR1:ENSCAFT00000044072.3:exon2:c.G233A:p.R78H,HAVCR1:ENSCAFT00000046230.2:exon2:c.G233A:p.R78H,HAVCR1:ENSCAFT00000049156.3:exon2:c.G233A:p.R78H,HAVCR1:ENSCAFT00000062327.1:exon2:c.G233A:p.R78H	SRP159481	Mammary Tumor
SRR7780744-SRR7780743	chr11	40411466	40411466	C	T	FOCAD	Missense_Mutation	ENSCAFT00000079827.1	exon11	c.C1523T	p.S508L	SNP	exonic	FOCAD		nonsynonymous SNV	FOCAD:ENSCAFT00000079827.1:exon11:c.C1523T:p.S508L,FOCAD:ENSCAFT00000069085.1:exon13:c.C1667T:p.S556L,FOCAD:ENSCAFT00000039148.3:exon14:c.C1769T:p.S590L,FOCAD:ENSCAFT00000066207.1:exon14:c.C1769T:p.S590L,FOCAD:ENSCAFT00000077254.1:exon14:c.C1769T:p.S590L,FOCAD:ENSCAFT00000086775.1:exon14:c.C1769T:p.S590L,FOCAD:ENSCAFT00000090257.1:exon14:c.C1769T:p.S590L,FOCAD:ENSCAFT00000091171.1:exon14:c.C1769T…	SRP159481	Mammary Tumor
SRR7780744-SRR7780743	chr14	7787210	7787210	G	A	ATP6V1F	Missense_Mutation	ENSCAFT00000002545.4	exon2	c.C247T	p.R83C	SNP	exonic	ATP6V1F		nonsynonymous SNV	ATP6V1F:ENSCAFT00000002545.4:exon2:c.C247T:p.R83C	SRP159481	Mammary Tumor
SRR7780744-SRR7780743	chr16	55358602	55358602	G	A	CSMD1	Missense_Mutation	ENSCAFT00000013885.4	exon33	c.C5294T	p.T1765M	SNP	exonic	CSMD1		nonsynonymous SNV	CSMD1:ENSCAFT00000013885.4:exon33:c.C5294T:p.T1765M	SRP159481	Mammary Tumor
SRR7780744-SRR7780743	chr18	20190328	20190328	T	C	GNAT3	Missense_Mutation	ENSCAFT00000021691.3	exon5	c.A469G	p.N157D	SNP	exonic	GNAT3		nonsynonymous SNV	GNAT3:ENSCAFT00000021691.3:exon5:c.A469G:p.N157D	SRP159481	Mammary Tumor
SRR7780744-SRR7780743	chr18	39296692	39296692	A	T	OR9G1	Missense_Mutation	ENSCAFT00000012790.3	exon1	c.A866T	p.Y289F	SNP	exonic	OR9G1		nonsynonymous SNV	OR9G1:ENSCAFT00000012790.3:exon1:c.A866T:p.Y289F	SRP159481	Mammary Tumor
SRR7780744-SRR7780743	chr18	49980775	49980775	C	T	PITPNM1	Missense_Mutation	ENSCAFT00000080526.1	exon11	c.C1798T	p.R600C	SNP	exonic	PITPNM1		nonsynonymous SNV	PITPNM1:ENSCAFT00000080526.1:exon11:c.C1798T:p.R600C,PITPNM1:ENSCAFT00000018215.5:exon12:c.C1894T:p.R632C,PITPNM1:ENSCAFT00000068418.1:exon12:c.C1894T:p.R632C,PITPNM1:ENSCAFT00000081465.1:exon12:c.C1894T:p.R632C	SRP159481	Mammary Tumor
SRR7780744-SRR7780743	chr21	48193302	48193302	G	A	BDNF	Missense_Mutation	ENSCAFT00000016200.4	exon4	c.C340T	p.R114W	SNP	exonic	BDNF		nonsynonymous SNV	BDNF:ENSCAFT00000016200.4:exon4:c.C340T:p.R114W	SRP159481	Mammary Tumor
SRR7780744-SRR7780743	chr23	31268523	31268523	A	G	CEP63	Missense_Mutation	ENSCAFT00000010879.5	exon5	c.A525G	p.I175M	SNP	exonic	CEP63		nonsynonymous SNV	CEP63:ENSCAFT00000010879.5:exon5:c.A525G:p.I175M,CEP63:ENSCAFT00000010883.4:exon5:c.A525G:p.I175M,CEP63:ENSCAFT00000060738.1:exon5:c.A525G:p.I175M,CEP63:ENSCAFT00000076024.1:exon5:c.A525G:p.I175M,CEP63:ENSCAFT00000076725.1:exon5:c.A801G:p.I267M,CEP63:ENSCAFT00000090146.1:exon5:c.A525G:p.I175M	SRP159481	Mammary Tumor
SRR7780744-SRR7780743	chr24	18561752	18561752	C	A	NOP56	Missense_Mutation	ENSCAFT00000010731.4	exon12	c.G1529T	p.R510I	SNP	exonic	NOP56		nonsynonymous SNV	NOP56:ENSCAFT00000010731.4:exon12:c.G1529T:p.R510I,NOP56:ENSCAFT00000067798.1:exon12:c.G1529T:p.R510I	SRP159481	Mammary Tumor
SRR7780744-SRR7780743	chr26	19037686	19037686	A	C	SGSM1	Missense_Mutation	ENSCAFT00000018283.5	exon16	c.A1849C	p.M617L	SNP	exonic	SGSM1		nonsynonymous SNV	SGSM1:ENSCAFT00000018283.5:exon16:c.A1849C:p.M617L,SGSM1:ENSCAFT00000066898.1:exon16:c.A1885C:p.M629L,SGSM1:ENSCAFT00000068903.1:exon16:c.A1849C:p.M617L,SGSM1:ENSCAFT00000086509.1:exon16:c.A1882C:p.M628L,SGSM1:ENSCAFT00000091035.1:exon17:c.A2014C:p.M672L,SGSM1:ENSCAFT00000018292.3:exon18:c.A2089C:p.M697L	SRP159481	Mammary Tumor
SRR7780744-SRR7780743	chr30	29986655	29986655	A	G	SLC24A1	Missense_Mutation	ENSCAFT00000027314.4	exon4	c.A2072G	p.H691R	SNP	exonic	SLC24A1		nonsynonymous SNV	SLC24A1:ENSCAFT00000027314.4:exon4:c.A2072G:p.H691R	SRP159481	Mammary Tumor
SRR7780744-SRR7780743	chr36	28236773	28236773	T	C	FSIP2	Missense_Mutation	ENSCAFT00000022989.4	exon15	c.T3787C	p.S1263P	SNP	exonic	FSIP2		nonsynonymous SNV	FSIP2:ENSCAFT00000022989.4:exon15:c.T3787C:p.S1263P,FSIP2:ENSCAFT00000073632.1:exon15:c.T3787C:p.S1263P,FSIP2:ENSCAFT00000045208.3:exon16:c.T3877C:p.S1293P	SRP159481	Mammary Tumor
SRR7780744-SRR7780743	chr4	6366936	6366936	A	C	MAP3K21	Missense_Mutation	ENSCAFT00000018358.6	exon4	c.T1195G	p.W399G	SNP	exonic	MAP3K21		nonsynonymous SNV	MAP3K21:ENSCAFT00000018358.6:exon4:c.T1195G:p.W399G,MAP3K21:ENSCAFT00000046477.2:exon5:c.T1153G:p.W385G	SRP159481	Mammary Tumor
SRR7780744-SRR7780743	chr4	58505612	58505612	C	T	SYNPO	Missense_Mutation	ENSCAFT00000028748.3	exon3	c.G505A	p.V169I	SNP	exonic	SYNPO		nonsynonymous SNV	SYNPO:ENSCAFT00000028748.3:exon3:c.G505A:p.V169I,SYNPO:ENSCAFT00000044540.2:exon3:c.G505A:p.V169I	SRP159481	Mammary Tumor
SRR7780744-SRR7780743	chr4	68312780	68312780	A	C	C6	Missense_Mutation	ENSCAFT00000029526.4	exon17	c.A2516C	p.K839T	SNP	exonic	C6		nonsynonymous SNV	C6:ENSCAFT00000029526.4:exon17:c.A2516C:p.K839T,C6:ENSCAFT00000074933.1:exon17:c.A2456C:p.K819T	SRP159481	Mammary Tumor
SRR7780744-SRR7780743	chr5	32563919	32563919	C	A	TP53	Missense_Mutation	ENSCAFT00000086831.1	exon3	c.G413T	p.R138L	SNP	exonic	TP53		nonsynonymous SNV	TP53:ENSCAFT00000086831.1:exon3:c.G413T:p.R138L,TP53:ENSCAFT00000026465.4:exon5:c.G482T:p.R161L,TP53:ENSCAFT00000081814.1:exon5:c.G674T:p.R225L	SRP159481	Mammary Tumor
SRR7780744-SRR7780743	chr5	32711381	32711381	C	T	TMEM88	Missense_Mutation	ENSCAFT00000026628.3	exon1	c.C77T	p.A26V	SNP	exonic	TMEM88		nonsynonymous SNV	TMEM88:ENSCAFT00000026628.3:exon1:c.C77T:p.A26V	SRP159481	Mammary Tumor
SRR7780744-SRR7780743	chr8	68963462	68963462	C	A	DLK1	Missense_Mutation	ENSCAFT00000028452.4	exon2	c.C97A	p.Q33K	SNP	exonic	DLK1		nonsynonymous SNV	DLK1:ENSCAFT00000028452.4:exon2:c.C97A:p.Q33K,DLK1:ENSCAFT00000068976.1:exon2:c.C97A:p.Q33K,DLK1:ENSCAFT00000085442.1:exon2:c.C97A:p.Q33K	SRP159481	Mammary Tumor
SRR7780744-SRR7780743	chr9	5892850	5892850	T	G	CD300H	Missense_Mutation	ENSCAFT00000049895.2	exon2	c.T328G	p.L110V	SNP	exonic	CD300H		nonsynonymous SNV	CD300H:ENSCAFT00000049895.2:exon2:c.T328G:p.L110V,CD300H:ENSCAFT00000059801.1:exon2:c.T298G:p.L100V	SRP159481	Mammary Tumor
SRR7780746-SRR7780745	chr1	60745289	60745289	G	C	TBC1D32	Missense_Mutation	ENSCAFT00000066413.1	exon21	c.C2385G	p.C795W	SNP	exonic	TBC1D32		nonsynonymous SNV	TBC1D32:ENSCAFT00000066413.1:exon21:c.C2385G:p.C795W,TBC1D32:ENSCAFT00000066508.1:exon22:c.C2508G:p.C836W,TBC1D32:ENSCAFT00000090283.1:exon22:c.C2601G:p.C867W,TBC1D32:ENSCAFT00000001480.5:exon23:c.C2670G:p.C890W,TBC1D32:ENSCAFT00000077084.1:exon24:c.C2718G:p.C906W,TBC1D32:ENSCAFT00000091974.1:exon24:c.C2718G:p.C906W	SRP159481	Mammary Tumor
SRR7780746-SRR7780745	chr1	119018242	119018242	C	T	GPATCH1	Missense_Mutation	ENSCAFT00000085224.1	exon15	c.G2317A	p.D773N	SNP	exonic	GPATCH1		nonsynonymous SNV	GPATCH1:ENSCAFT00000085224.1:exon15:c.G2317A:p.D773N,GPATCH1:ENSCAFT00000011948.4:exon16:c.G2860A:p.D954N,GPATCH1:ENSCAFT00000090504.1:exon16:c.G2860A:p.D954N	SRP159481	Mammary Tumor
SRR7780746-SRR7780745	chr15	39569075	39569075	C	T	NR1H4	Missense_Mutation	ENSCAFT00000011000.4	exon2	c.C191T	p.P64L	SNP	exonic	NR1H4		nonsynonymous SNV	NR1H4:ENSCAFT00000011000.4:exon2:c.C191T:p.P64L,NR1H4:ENSCAFT00000044453.3:exon4:c.C164T:p.P55L	SRP159481	Mammary Tumor
SRR7780746-SRR7780745	chr18	46490785	46490785	G	A	TRPM5	Missense_Mutation	ENSCAFT00000048371.3	exon6	c.C491T	p.A164V	SNP	exonic	TRPM5		nonsynonymous SNV	TRPM5:ENSCAFT00000048371.3:exon6:c.C491T:p.A164V	SRP159481	Mammary Tumor
SRR7780746-SRR7780745	chr24	27155917	27155917	G	A	ACTR5	Missense_Mutation	ENSCAFT00000014316.4	exon2	c.G468A	p.M156I	SNP	exonic	ACTR5		nonsynonymous SNV	ACTR5:ENSCAFT00000014316.4:exon2:c.G468A:p.M156I	SRP159481	Mammary Tumor
SRR7780746-SRR7780745	chr25	48007059	48007059	C	T	COL6A3	Missense_Mutation	ENSCAFT00000019426.4	exon14	c.G4418A	p.G1473D	SNP	exonic	COL6A3		nonsynonymous SNV	COL6A3:ENSCAFT00000019426.4:exon14:c.G4418A:p.G1473D,COL6A3:ENSCAFT00000085717.1:exon14:c.G4418A:p.G1473D,COL6A3:ENSCAFT00000084677.1:exon16:c.G5621A:p.G1874D,COL6A3:ENSCAFT00000019411.5:exon17:c.G6239A:p.G2080D,COL6A3:ENSCAFT00000019420.5:exon17:c.G6239A:p.G2080D	SRP159481	Mammary Tumor
SRR7780746-SRR7780745	chr29	17003623	17003623	G	C	CPA6	Missense_Mutation	ENSCAFT00000012117.4	exon4	c.C355G	p.Q119E	SNP	exonic	CPA6		nonsynonymous SNV	CPA6:ENSCAFT00000012117.4:exon4:c.C355G:p.Q119E	SRP159481	Mammary Tumor
SRR7780746-SRR7780745	chr34	12675666	12675666	T	A	PIK3CA	Missense_Mutation	ENSCAFT00000080543.1	exon20	c.T3132A	p.N1044K	SNP	exonic	PIK3CA		nonsynonymous SNV	PIK3CA:ENSCAFT00000080543.1:exon20:c.T3132A:p.N1044K	SRP159481	Mammary Tumor
SRR7780746-SRR7780745	chr4	5387800	5387800	C	T	TARBP1	Missense_Mutation	ENSCAFT00000018299.7	exon12	c.C1928T	p.A643V	SNP	exonic	TARBP1		nonsynonymous SNV	TARBP1:ENSCAFT00000018299.7:exon12:c.C1928T:p.A643V,TARBP1:ENSCAFT00000045343.2:exon12:c.C1928T:p.A643V,TARBP1:ENSCAFT00000070873.1:exon12:c.C1925T:p.A642V	SRP159481	Mammary Tumor
SRR7780746-SRR7780745	chr7	4218825	4218825	A	T	PTPRC	Missense_Mutation	ENSCAFT00000017955.4	exon4	c.T281A	p.V94E	SNP	exonic	PTPRC		nonsynonymous SNV	PTPRC:ENSCAFT00000017955.4:exon4:c.T281A:p.V94E,PTPRC:ENSCAFT00000017964.5:exon4:c.T281A:p.V94E,PTPRC:ENSCAFT00000080059.1:exon4:c.T281A:p.V94E	SRP159481	Mammary Tumor
SRR7780746-SRR7780745	chr27	5963110	5963110	A	G	OR8S14	Missense_Mutation	ENSCAFT00000043270.2	exon1	c.T644C	p.F215S	SNP	exonic	OR8S14		nonsynonymous SNV	OR8S14:ENSCAFT00000043270.2:exon1:c.T644C:p.F215S	SRP159481	Mammary Tumor
SRR7780747-SRR7780748	chr16	28341086	28341086	G	A	KCNU1	Missense_Mutation	ENSCAFT00000044860.2	exon24	c.C2644T	p.R882W	SNP	exonic	KCNU1		nonsynonymous SNV	KCNU1:ENSCAFT00000044860.2:exon24:c.C2644T:p.R882W,KCNU1:ENSCAFT00000042893.3:exon25:c.C2815T:p.R939W,KCNU1:ENSCAFT00000084761.1:exon25:c.C2815T:p.R939W	SRP159481	Mammary Tumor
SRR7780747-SRR7780748	chr27	823493	823493	G	A	NCKAP1L	Missense_Mutation	ENSCAFT00000010414.4	exon20	c.C2057T	p.A686V	SNP	exonic	NCKAP1L		nonsynonymous SNV	NCKAP1L:ENSCAFT00000010414.4:exon20:c.C2057T:p.A686V	SRP159481	Mammary Tumor
SRR7780747-SRR7780748	chr28	30014855	30014855	A	G	SEC23IP	Missense_Mutation	ENSCAFT00000019531.4	exon3	c.A908G	p.Y303C	SNP	exonic	SEC23IP		nonsynonymous SNV	SEC23IP:ENSCAFT00000019531.4:exon3:c.A908G:p.Y303C,SEC23IP:ENSCAFT00000080782.1:exon3:c.A908G:p.Y303C,SEC23IP:ENSCAFT00000093345.1:exon3:c.A908G:p.Y303C	SRP159481	Mammary Tumor
SRR7780747-SRR7780748	chr3	60036186	60036186	G	A	SH3TC1	Missense_Mutation	ENSCAFT00000080858.1	exon11	c.G2266A	p.A756T	SNP	exonic	SH3TC1		nonsynonymous SNV	SH3TC1:ENSCAFT00000080858.1:exon11:c.G2266A:p.A756T,SH3TC1:ENSCAFT00000023093.5:exon12:c.G1885A:p.A629T	SRP159481	Mammary Tumor
SRR7780747-SRR7780748	chr30	14959866	14959866	T	G	CEP152	Missense_Mutation	ENSCAFT00000023477.5	exon25	c.A3976C	p.M1326L	SNP	exonic	CEP152		nonsynonymous SNV	CEP152:ENSCAFT00000023477.5:exon25:c.A3976C:p.M1326L,CEP152:ENSCAFT00000047831.3:exon25:c.A4003C:p.M1335L,CEP152:ENSCAFT00000045129.2:exon26:c.A4144C:p.M1382L	SRP159481	Mammary Tumor
SRR7780747-SRR7780748	chr34	12674633	12674633	G	A	PIK3CA	Missense_Mutation	ENSCAFT00000080543.1	exon19	c.G2908A	p.E970K	SNP	exonic	PIK3CA		nonsynonymous SNV	PIK3CA:ENSCAFT00000080543.1:exon19:c.G2908A:p.E970K,PIK3CA:ENSCAFT00000017863.4:exon20:c.G2908A:p.E970K	SRP159481	Mammary Tumor
SRR7780752-SRR7780820	chr2	18658337	18658337	T	A	CACNB2	Missense_Mutation	ENSCAFT00000007222.4	exon2	c.A91T	p.S31C	SNP	exonic	CACNB2		nonsynonymous SNV	CACNB2:ENSCAFT00000007222.4:exon2:c.A91T:p.S31C,CACNB2:ENSCAFT00000061768.1:exon2:c.A73T:p.S25C,CACNB2:ENSCAFT00000078353.1:exon2:c.A91T:p.S31C,CACNB2:ENSCAFT00000080894.1:exon2:c.A70T:p.S24C,CACNB2:ENSCAFT00000083597.1:exon2:c.A70T:p.S24C,CACNB2:ENSCAFT00000083693.1:exon2:c.A115T:p.S39C,CACNB2:ENSCAFT00000084211.1:exon2:c.A103T:p.S35C,CACNB2:ENSCAFT00000087739.1:exon2:c.A55T:p.S19C,CACNB2:ENSCAF…	SRP159481	Mammary Tumor
SRR7780752-SRR7780820	chr21	16204947	16204947	G	T	DDIAS	Missense_Mutation	ENSCAFT00000045002.3	exon4	c.C201A	p.N67K	SNP	exonic	DDIAS		nonsynonymous SNV	DDIAS:ENSCAFT00000045002.3:exon4:c.C201A:p.N67K	SRP159481	Mammary Tumor
SRR7780752-SRR7780820	chr34	12675674	12675674	A	G	PIK3CA	Missense_Mutation	ENSCAFT00000080543.1	exon20	c.A3140G	p.H1047R	SNP	exonic	PIK3CA		nonsynonymous SNV	PIK3CA:ENSCAFT00000080543.1:exon20:c.A3140G:p.H1047R	SRP159481	Mammary Tumor
SRR7780752-SRR7780820	chr4	52862628	52862628	C	T	CYFIP2	Missense_Mutation	ENSCAFT00000065791.1	exon4	c.G427A	p.A143T	SNP	exonic	CYFIP2		nonsynonymous SNV	CYFIP2:ENSCAFT00000065791.1:exon4:c.G427A:p.A143T,CYFIP2:ENSCAFT00000086280.1:exon4:c.G403A:p.A135T,CYFIP2:ENSCAFT00000063861.1:exon5:c.G505A:p.A169T,CYFIP2:ENSCAFT00000078919.1:exon5:c.G505A:p.A169T,CYFIP2:ENSCAFT00000089554.1:exon5:c.G505A:p.A169T,CYFIP2:ENSCAFT00000091186.1:exon5:c.G505A:p.A169T,CYFIP2:ENSCAFT00000092537.1:exon5:c.G505A:p.A169T,CYFIP2:ENSCAFT00000027770.4:exon6:c.G538A:p.A180T	SRP159481	Mammary Tumor
SRR7780752-SRR7780820	chr6	22816311	22816311	C	A	HS3ST2	Missense_Mutation	ENSCAFT00000049780.2	exon2	c.G498T	p.K166N	SNP	exonic	HS3ST2		nonsynonymous SNV	HS3ST2:ENSCAFT00000049780.2:exon2:c.G498T:p.K166N	SRP159481	Mammary Tumor
SRR7780752-SRR7780820	chr37	14715586	14715586	T	G	EEF1B2	Missense_Mutation	ENSCAFT00000043208.2	exon4	c.T215G	p.V72G	SNP	exonic	EEF1B2		nonsynonymous SNV	EEF1B2:ENSCAFT00000043208.2:exon4:c.T215G:p.V72G	SRP159481	Mammary Tumor
SRR7780753-SRR7780754	chr10	15967733	15967733	C	A	GLIPR1	Missense_Mutation	ENSCAFT00000000817.5	exon3	c.C466A	p.P156T	SNP	exonic	GLIPR1		nonsynonymous SNV	GLIPR1:ENSCAFT00000000817.5:exon3:c.C466A:p.P156T	SRP159481	Mammary Tumor
SRR7780753-SRR7780754	chr17	7107730	7107730	C	G	RRM2	Missense_Mutation	ENSCAFT00000005482.4	exon6	c.C1007G	p.A336G	SNP	exonic	RRM2		nonsynonymous SNV	RRM2:ENSCAFT00000005482.4:exon6:c.C1007G:p.A336G,RRM2:ENSCAFT00000075996.1:exon6:c.C1007G:p.A336G	SRP159481	Mammary Tumor
SRR7780753-SRR7780754	chr18	51221300	51221300	C	T	GAL3ST3	Missense_Mutation	ENSCAFT00000020715.4	exon2	c.C178T	p.R60C	SNP	exonic	GAL3ST3		nonsynonymous SNV	GAL3ST3:ENSCAFT00000020715.4:exon2:c.C178T:p.R60C	SRP159481	Mammary Tumor
SRR7780753-SRR7780754	chr27	22261798	22261798	G	T	KRAS	Missense_Mutation	ENSCAFT00000010525.4	exon2	c.G317T	p.G106V	SNP	exonic	KRAS		nonsynonymous SNV	KRAS:ENSCAFT00000010525.4:exon2:c.G317T:p.G106V,KRAS:ENSCAFT00000093055.1:exon2:c.G317T:p.G106V	SRP159481	Mammary Tumor
SRR7780753-SRR7780754	chr34	12675674	12675674	A	G	PIK3CA	Missense_Mutation	ENSCAFT00000080543.1	exon20	c.A3140G	p.H1047R	SNP	exonic	PIK3CA		nonsynonymous SNV	PIK3CA:ENSCAFT00000080543.1:exon20:c.A3140G:p.H1047R	SRP159481	Mammary Tumor
SRR7780753-SRR7780754	chr38	22256128	22256128	C	T	CFAP45	Missense_Mutation	ENSCAFT00000018741.4	exon3	c.C296T	p.A99V	SNP	exonic	CFAP45		nonsynonymous SNV	CFAP45:ENSCAFT00000018741.4:exon3:c.C296T:p.A99V	SRP159481	Mammary Tumor
SRR7780753-SRR7780754	chr5	84084568	84084568	G	A	CDH11	Missense_Mutation	ENSCAFT00000032530.4	exon4	c.G574A	p.G192R	SNP	exonic	CDH11		nonsynonymous SNV	CDH11:ENSCAFT00000032530.4:exon4:c.G574A:p.G192R	SRP159481	Mammary Tumor
SRR7780753-SRR7780754	chr9	4497471	4497471	G	A	RNF157	Missense_Mutation	ENSCAFT00000008137.4	exon13	c.G1442A	p.R481H	SNP	exonic	RNF157		nonsynonymous SNV	RNF157:ENSCAFT00000008137.4:exon13:c.G1442A:p.R481H,RNF157:ENSCAFT00000079969.1:exon13:c.G1442A:p.R481H	SRP159481	Mammary Tumor
SRR7780757-SRR7780756	chr1	97105205	97105205	C	G	S1PR3	Missense_Mutation	ENSCAFT00000003462.3	exon1	c.G653C	p.R218T	SNP	exonic	S1PR3		nonsynonymous SNV	S1PR3:ENSCAFT00000003462.3:exon1:c.G653C:p.R218T	SRP159481	Mammary Tumor
SRR7780757-SRR7780756	chr10	25422738	25422738	C	A	CACNA1I	Missense_Mutation	ENSCAFT00000002048.6	exon6	c.G973T	p.V325L	SNP	exonic	CACNA1I		nonsynonymous SNV	CACNA1I:ENSCAFT00000002048.6:exon6:c.G973T:p.V325L,CACNA1I:ENSCAFT00000046802.3:exon6:c.G973T:p.V325L,CACNA1I:ENSCAFT00000059550.1:exon6:c.G973T:p.V325L	SRP159481	Mammary Tumor
SRR7780757-SRR7780756	chr13	38739588	38739588	G	A	LIMCH1	Missense_Mutation	ENSCAFT00000059651.1	exon5	c.G910A	p.E304K	SNP	exonic	LIMCH1		nonsynonymous SNV	LIMCH1:ENSCAFT00000059651.1:exon5:c.G910A:p.E304K,LIMCH1:ENSCAFT00000075768.1:exon7:c.G754A:p.E252K,LIMCH1:ENSCAFT00000002810.5:exon8:c.G775A:p.E259K,LIMCH1:ENSCAFT00000002813.4:exon8:c.G775A:p.E259K,LIMCH1:ENSCAFT00000075197.1:exon8:c.G298A:p.E100K,LIMCH1:ENSCAFT00000077377.1:exon8:c.G721A:p.E241K,LIMCH1:ENSCAFT00000089680.1:exon8:c.G712A:p.E238K,LIMCH1:ENSCAFT00000091397.1:exon8:c.G298A:p.E100K…	SRP159481	Mammary Tumor
SRR7780757-SRR7780756	chr14	31191231	31191231	A	G	BZW2	Missense_Mutation	ENSCAFT00000073174.1	exon3	c.A957G	p.I319M	SNP	exonic	BZW2		nonsynonymous SNV	BZW2:ENSCAFT00000073174.1:exon3:c.A957G:p.I319M,BZW2:ENSCAFT00000081477.1:exon4:c.A255G:p.I85M,BZW2:ENSCAFT00000082855.1:exon4:c.A360G:p.I120M,BZW2:ENSCAFT00000003813.4:exon5:c.A450G:p.I150M	SRP159481	Mammary Tumor
SRR7780757-SRR7780756	chr15	6575220	6575220	C	T	NCDN	Missense_Mutation	ENSCAFT00000005698.4	exon7	c.G1979A	p.R660H	SNP	exonic	NCDN		nonsynonymous SNV	NCDN:ENSCAFT00000005698.4:exon7:c.G1979A:p.R660H,NCDN:ENSCAFT00000072430.1:exon7:c.G1928A:p.R643H	SRP159481	Mammary Tumor
SRR7780757-SRR7780756	chr18	21676121	21676121	C	T	CACNA2D1	Missense_Mutation	ENSCAFT00000010276.4	exon9	c.G667A	p.G223R	SNP	exonic	CACNA2D1		nonsynonymous SNV	CACNA2D1:ENSCAFT00000010276.4:exon9:c.G667A:p.G223R	SRP159481	Mammary Tumor
SRR7780757-SRR7780756	chr18	50663209	50663209	G	A	SPTBN2	Missense_Mutation	ENSCAFT00000087940.1	exon22	c.G4676A	p.R1559H	SNP	exonic	SPTBN2		nonsynonymous SNV	SPTBN2:ENSCAFT00000087940.1:exon22:c.G4676A:p.R1559H,SPTBN2:ENSCAFT00000019629.6:exon23:c.G4694A:p.R1565H,SPTBN2:ENSCAFT00000047913.2:exon23:c.G4694A:p.R1565H,SPTBN2:ENSCAFT00000063683.1:exon23:c.G4274A:p.R1425H	SRP159481	Mammary Tumor
SRR7780757-SRR7780756	chr18	52391359	52391359	C	T	SF1	Missense_Mutation	ENSCAFT00000022618.4	exon12	c.C1418T	p.P473L	SNP	exonic	SF1		nonsynonymous SNV	SF1:ENSCAFT00000022618.4:exon12:c.C1418T:p.P473L,SF1:ENSCAFT00000064961.1:exon12:c.C1775T:p.P592L,SF1:ENSCAFT00000076196.1:exon12:c.C1418T:p.P473L	SRP159481	Mammary Tumor
SRR7780757-SRR7780756	chr2	66773778	66773778	G	A	LONP2	Missense_Mutation	ENSCAFT00000068274.1	exon7	c.C1138T	p.R380C	SNP	exonic	LONP2		nonsynonymous SNV	LONP2:ENSCAFT00000068274.1:exon7:c.C1138T:p.R380C,LONP2:ENSCAFT00000015963.4:exon8:c.C1270T:p.R424C,LONP2:ENSCAFT00000093362.1:exon8:c.C1270T:p.R424C	SRP159481	Mammary Tumor
SRR7780757-SRR7780756	chr21	7034116	7034116	G	T	CEP295	Missense_Mutation	ENSCAFT00000006791.4	exon12	c.C556A	p.Q186K	SNP	exonic	CEP295		nonsynonymous SNV	CEP295:ENSCAFT00000006791.4:exon12:c.C556A:p.Q186K	SRP159481	Mammary Tumor
SRR7780757-SRR7780756	chr21	23374722	23374722	G	C	SLCO2B1	Missense_Mutation	ENSCAFT00000062332.1	exon3	c.C262G	p.L88V	SNP	exonic	SLCO2B1		nonsynonymous SNV	SLCO2B1:ENSCAFT00000062332.1:exon3:c.C262G:p.L88V,SLCO2B1:ENSCAFT00000073706.1:exon5:c.C553G:p.L185V,SLCO2B1:ENSCAFT00000008744.4:exon6:c.C691G:p.L231V,SLCO2B1:ENSCAFT00000008778.4:exon6:c.C1708G:p.L570V,SLCO2B1:ENSCAFT00000085380.1:exon6:c.C694G:p.L232V,SLCO2B1:ENSCAFT00000087536.1:exon6:c.C694G:p.L232V,SLCO2B1:ENSCAFT00000093137.1:exon6:c.C760G:p.L254V,SLCO2B1:ENSCAFT00000070384.1:exon8:c.C733G…	SRP159481	Mammary Tumor
SRR7780757-SRR7780756	chr23	21949584	21949584	C	A	ZNF385D	Missense_Mutation	ENSCAFT00000009344.4	exon3	c.C176A	p.A59D	SNP	exonic	ZNF385D		nonsynonymous SNV	ZNF385D:ENSCAFT00000009344.4:exon3:c.C176A:p.A59D,ZNF385D:ENSCAFT00000060342.1:exon3:c.C185A:p.A62D,ZNF385D:ENSCAFT00000065895.1:exon3:c.C185A:p.A62D	SRP159481	Mammary Tumor
SRR7780757-SRR7780756	chr26	1780650	1780650	C	T	PIWIL1	Missense_Mutation	ENSCAFT00000010928.3	exon8	c.G817A	p.V273I	SNP	exonic	PIWIL1		nonsynonymous SNV	PIWIL1:ENSCAFT00000010928.3:exon8:c.G817A:p.V273I,PIWIL1:ENSCAFT00000010937.5:exon8:c.G817A:p.V273I	SRP159481	Mammary Tumor
SRR7780757-SRR7780756	chr28	21928019	21928019	T	G	SMC3	Missense_Mutation	ENSCAFT00000084519.1	exon27	c.T3345G	p.D1115E	SNP	exonic	SMC3		nonsynonymous SNV	SMC3:ENSCAFT00000084519.1:exon27:c.T3345G:p.D1115E,SMC3:ENSCAFT00000081582.1:exon28:c.T3600G:p.D1200E,SMC3:ENSCAFT00000017137.4:exon29:c.T3639G:p.D1213E	SRP159481	Mammary Tumor
SRR7780757-SRR7780756	chr3	55681587	55681587	C	T	ADAMTSL3	Missense_Mutation	ENSCAFT00000063932.1	exon26	c.C4709T	p.T1570M	SNP	exonic	ADAMTSL3		nonsynonymous SNV	ADAMTSL3:ENSCAFT00000063932.1:exon26:c.C4709T:p.T1570M,ADAMTSL3:ENSCAFT00000090522.1:exon26:c.C4649T:p.T1550M,ADAMTSL3:ENSCAFT00000021096.4:exon27:c.C4691T:p.T1564M	SRP159481	Mammary Tumor
SRR7780757-SRR7780756	chr3	61008729	61008729	G	C	RGS12	Missense_Mutation	ENSCAFT00000048451.2	exon1	c.C303G	p.H101Q	SNP	exonic	RGS12		nonsynonymous SNV	RGS12:ENSCAFT00000048451.2:exon1:c.C303G:p.H101Q,RGS12:ENSCAFT00000068596.1:exon1:c.C303G:p.H101Q,RGS12:ENSCAFT00000072322.1:exon1:c.C303G:p.H101Q	SRP159481	Mammary Tumor
SRR7780757-SRR7780756	chr32	32127040	32127040	C	A	TIFA	Missense_Mutation	ENSCAFT00000018489.3	exon1	c.G152T	p.G51V	SNP	exonic	TIFA		nonsynonymous SNV	TIFA:ENSCAFT00000018489.3:exon1:c.G152T:p.G51V	SRP159481	Mammary Tumor
SRR7780757-SRR7780756	chr4	57787218	57787218	A	C	FAT2	Missense_Mutation	ENSCAFT00000028363.5	exon10	c.A7570C	p.I2524L	SNP	exonic	FAT2		nonsynonymous SNV	FAT2:ENSCAFT00000028363.5:exon10:c.A7570C:p.I2524L,FAT2:ENSCAFT00000049559.3:exon10:c.A7570C:p.I2524L	SRP159481	Mammary Tumor
SRR7780757-SRR7780756	chr5	78609111	78609111	G	A	ZFHX3	Missense_Mutation	ENSCAFT00000032240.5	exon1	c.C877T	p.R293C	SNP	exonic	ZFHX3		nonsynonymous SNV	ZFHX3:ENSCAFT00000032240.5:exon1:c.C877T:p.R293C	SRP159481	Mammary Tumor
SRR7780757-SRR7780756	chr6	8877534	8877534	C	T	ACHE	Missense_Mutation	ENSCAFT00000022306.4	exon3	c.C1333T	p.R445C	SNP	exonic	ACHE		nonsynonymous SNV	ACHE:ENSCAFT00000022306.4:exon3:c.C1333T:p.R445C,ACHE:ENSCAFT00000064180.1:exon3:c.C1435T:p.R479C,ACHE:ENSCAFT00000077980.1:exon3:c.C1333T:p.R445C,ACHE:ENSCAFT00000080058.1:exon3:c.C1333T:p.R445C	SRP159481	Mammary Tumor
SRR7780757-SRR7780756	chr7	40045107	40045107	G	A	NVL	Missense_Mutation	ENSCAFT00000025949.4	exon2	c.G43A	p.G15R	SNP	exonic	NVL		nonsynonymous SNV	NVL:ENSCAFT00000025949.4:exon2:c.G43A:p.G15R,NVL:ENSCAFT00000049264.3:exon2:c.G97A:p.G33R,NVL:ENSCAFT00000062862.1:exon2:c.G97A:p.G33R,NVL:ENSCAFT00000077355.1:exon2:c.G97A:p.G33R,NVL:ENSCAFT00000080688.1:exon2:c.G97A:p.G33R,NVL:ENSCAFT00000090334.1:exon2:c.G97A:p.G33R	SRP159481	Mammary Tumor
SRR7780757-SRR7780756	chr8	46358295	46358295	G	A	ZFYVE1	Missense_Mutation	ENSCAFT00000063231.1	exon6	c.C527T	p.A176V	SNP	exonic	ZFYVE1		nonsynonymous SNV	ZFYVE1:ENSCAFT00000063231.1:exon6:c.C527T:p.A176V,ZFYVE1:ENSCAFT00000026604.4:exon8:c.C1772T:p.A591V	SRP159481	Mammary Tumor
SRR7780757-SRR7780756	chr8	53214023	53214023	A	C	CEP128	Missense_Mutation	ENSCAFT00000078927.1	exon9	c.T734G	p.L245R	SNP	exonic	CEP128		nonsynonymous SNV	CEP128:ENSCAFT00000078927.1:exon9:c.T734G:p.L245R,CEP128:ENSCAFT00000091901.1:exon10:c.T704G:p.L235R,CEP128:ENSCAFT00000027397.4:exon11:c.T821G:p.L274R,CEP128:ENSCAFT00000068095.1:exon11:c.T821G:p.L274R,CEP128:ENSCAFT00000070649.1:exon11:c.T821G:p.L274R,CEP128:ENSCAFT00000071563.1:exon11:c.T821G:p.L274R,CEP128:ENSCAFT00000085354.1:exon11:c.T821G:p.L274R,CEP128:ENSCAFT00000089222.1:exon11:c.T821G:…	SRP159481	Mammary Tumor
SRR7780757-SRR7780756	chr9	21209135	21209135	C	G	KRT9	Missense_Mutation	ENSCAFT00000048059.3	exon7	c.C1562G	p.A521G	SNP	exonic	KRT9		nonsynonymous SNV	KRT9:ENSCAFT00000048059.3:exon7:c.C1562G:p.A521G,KRT9:ENSCAFT00000048930.2:exon7:c.C1670G:p.A557G	SRP159481	Mammary Tumor
SRR7780757-SRR7780756	chr33	5315885	5315885	T	C	OR5K18	Missense_Mutation	ENSCAFT00000065626.1	exon1	c.T191C	p.M64T	SNP	exonic	OR5K18		nonsynonymous SNV	OR5K18:ENSCAFT00000065626.1:exon1:c.T191C:p.M64T	SRP159481	Mammary Tumor
SRR7780767-SRR7780766	chr1	28581691	28581691	G	A	PDE7B	Missense_Mutation	ENSCAFT00000000378.4	exon2	c.G31A	p.E11K	SNP	exonic	PDE7B		nonsynonymous SNV	PDE7B:ENSCAFT00000000378.4:exon2:c.G31A:p.E11K	SRP159481	Mammary Tumor
SRR7780767-SRR7780766	chr20	45477810	45477810	G	T	USHBP1	Missense_Mutation	ENSCAFT00000024527.2	exon2	c.G122T	p.G41V	SNP	exonic	USHBP1		nonsynonymous SNV	USHBP1:ENSCAFT00000024527.2:exon2:c.G122T:p.G41V	SRP159481	Mammary Tumor
SRR7780767-SRR7780766	chr27	22261798	22261798	G	T	KRAS	Missense_Mutation	ENSCAFT00000010525.4	exon2	c.G317T	p.G106V	SNP	exonic	KRAS		nonsynonymous SNV	KRAS:ENSCAFT00000010525.4:exon2:c.G317T:p.G106V,KRAS:ENSCAFT00000093055.1:exon2:c.G317T:p.G106V	SRP159481	Mammary Tumor
SRR7780767-SRR7780766	chr29	20997019	20997019	C	T	TRPA1	Missense_Mutation	ENSCAFT00000012682.4	exon2	c.G214A	p.A72T	SNP	exonic	TRPA1		nonsynonymous SNV	TRPA1:ENSCAFT00000012682.4:exon2:c.G214A:p.A72T,TRPA1:ENSCAFT00000084369.1:exon2:c.G214A:p.A72T,TRPA1:ENSCAFT00000085336.1:exon2:c.G214A:p.A72T,TRPA1:ENSCAFT00000088797.1:exon2:c.G214A:p.A72T	SRP159481	Mammary Tumor
SRR7780767-SRR7780766	chr32	32382386	32382386	G	T	ZGRF1	Missense_Mutation	ENSCAFT00000018553.5	exon11	c.C3733A	p.Q1245K	SNP	exonic	ZGRF1		nonsynonymous SNV	ZGRF1:ENSCAFT00000018553.5:exon11:c.C3733A:p.Q1245K,ZGRF1:ENSCAFT00000044732.2:exon12:c.C3919A:p.Q1307K,ZGRF1:ENSCAFT00000018567.5:exon13:c.C3979A:p.Q1327K,ZGRF1:ENSCAFT00000045458.3:exon13:c.C3979A:p.Q1327K	SRP159481	Mammary Tumor
SRR7780767-SRR7780766	chr6	9848375	9848375	C	T	CYP3A26	Missense_Mutation	ENSCAFT00000023623.4	exon8	c.G779A	p.R260H	SNP	exonic	CYP3A26		nonsynonymous SNV	CYP3A26:ENSCAFT00000023623.4:exon8:c.G779A:p.R260H,CYP3A26:ENSCAFT00000061904.1:exon8:c.G701A:p.R234H,CYP3A26:ENSCAFT00000070806.1:exon8:c.G779A:p.R260H,CYP3A26:ENSCAFT00000077891.1:exon8:c.G779A:p.R260H,CYP3A26:ENSCAFT00000085015.1:exon8:c.G779A:p.R260H,CYP3A26:ENSCAFT00000086581.1:exon8:c.G779A:p.R260H	SRP159481	Mammary Tumor
SRR7780771-SRR7780770	chr1	110460006	110460006	C	T	RELB	Missense_Mutation	ENSCAFT00000048091.3	exon2	c.G346A	p.G116S	SNP	exonic	RELB		nonsynonymous SNV	RELB:ENSCAFT00000048091.3:exon2:c.G346A:p.G116S,RELB:ENSCAFT00000007406.5:exon3:c.G388A:p.G130S	SRP159481	Mammary Tumor
SRR7780771-SRR7780770	chr18	41088806	41088806	C	T	OR4A2	Missense_Mutation	ENSCAFT00000049377.1	exon1	c.G359A	p.R120H	SNP	exonic	OR4A2		nonsynonymous SNV	OR4A2:ENSCAFT00000049377.1:exon1:c.G359A:p.R120H	SRP159481	Mammary Tumor
SRR7780771-SRR7780770	chr18	54899957	54899957	C	T	SYT7	Missense_Mutation	ENSCAFT00000063741.1	exon5	c.C371T	p.T124M	SNP	exonic	SYT7		nonsynonymous SNV	SYT7:ENSCAFT00000063741.1:exon5:c.C371T:p.T124M,SYT7:ENSCAFT00000085862.1:exon5:c.C965T:p.T322M,SYT7:ENSCAFT00000025578.3:exon6:c.C1097T:p.T366M,SYT7:ENSCAFT00000025580.5:exon6:c.C1097T:p.T366M	SRP159481	Mammary Tumor
SRR7780771-SRR7780770	chr2	23191514	23191514	A	G	PHYH	Missense_Mutation	ENSCAFT00000066939.1	exon1	c.A55G	p.R19G	SNP	exonic	PHYH		nonsynonymous SNV	PHYH:ENSCAFT00000066939.1:exon1:c.A55G:p.R19G	SRP159481	Mammary Tumor
SRR7780771-SRR7780770	chr25	51160734	51160734	G	A	PASK	Missense_Mutation	ENSCAFT00000020384.4	exon10	c.C1325T	p.P442L	SNP	exonic	PASK		nonsynonymous SNV	PASK:ENSCAFT00000020384.4:exon10:c.C1325T:p.P442L,PASK:ENSCAFT00000065847.1:exon10:c.C1325T:p.P442L	SRP159481	Mammary Tumor
SRR7780771-SRR7780770	chr5	78462510	78462510	G	A	ZFHX3	Missense_Mutation	ENSCAFT00000032240.5	exon8	c.C7673T	p.S2558L	SNP	exonic	ZFHX3		nonsynonymous SNV	ZFHX3:ENSCAFT00000032240.5:exon8:c.C7673T:p.S2558L	SRP159481	Mammary Tumor
SRR7780771-SRR7780770	chr8	3213161	3213161	A	G	LRP10	Missense_Mutation	ENSCAFT00000061213.1	exon4	c.A1348G	p.T450A	SNP	exonic	LRP10		nonsynonymous SNV	LRP10:ENSCAFT00000061213.1:exon4:c.A1348G:p.T450A,LRP10:ENSCAFT00000017804.4:exon6:c.A1393G:p.T465A,LRP10:ENSCAFT00000063878.1:exon6:c.A1393G:p.T465A,LRP10:ENSCAFT00000075888.1:exon6:c.A1393G:p.T465A,LRP10:ENSCAFT00000089516.1:exon6:c.A1393G:p.T465A	SRP159481	Mammary Tumor
SRR7780771-SRR7780770	chr8	3213165	3213165	G	T	LRP10	Missense_Mutation	ENSCAFT00000061213.1	exon4	c.G1352T	p.C451F	SNP	exonic	LRP10		nonsynonymous SNV	LRP10:ENSCAFT00000061213.1:exon4:c.G1352T:p.C451F,LRP10:ENSCAFT00000017804.4:exon6:c.G1397T:p.C466F,LRP10:ENSCAFT00000063878.1:exon6:c.G1397T:p.C466F,LRP10:ENSCAFT00000075888.1:exon6:c.G1397T:p.C466F,LRP10:ENSCAFT00000089516.1:exon6:c.G1397T:p.C466F	SRP159481	Mammary Tumor
SRR7780771-SRR7780770	chr8	10607066	10607066	C	T	HEATR5A	Missense_Mutation	ENSCAFT00000070421.1	exon18	c.G2735A	p.R912K	SNP	exonic	HEATR5A		nonsynonymous SNV	HEATR5A:ENSCAFT00000070421.1:exon18:c.G2735A:p.R912K,HEATR5A:ENSCAFT00000088691.1:exon19:c.G2933A:p.R978K,HEATR5A:ENSCAFT00000020840.4:exon20:c.G3086A:p.R1029K,HEATR5A:ENSCAFT00000061699.1:exon20:c.G3086A:p.R1029K,HEATR5A:ENSCAFT00000063416.1:exon20:c.G3086A:p.R1029K,HEATR5A:ENSCAFT00000078562.1:exon20:c.G3086A:p.R1029K,HEATR5A:ENSCAFT00000083450.1:exon20:c.G3086A:p.R1029K	SRP159481	Mammary Tumor
SRR7780771-SRR7780770	chr10	305421	305421	C	G	CDK2	Missense_Mutation	ENSCAFT00000077974.1	exon5	c.C700G	p.P234A	SNP	exonic	CDK2		nonsynonymous SNV	CDK2:ENSCAFT00000077974.1:exon5:c.C700G:p.P234A,CDK2:ENSCAFT00000089685.1:exon6:c.C778G:p.P260A,CDK2:ENSCAFT00000000140.2:exon7:c.C880G:p.P294A,CDK2:ENSCAFT00000084046.1:exon8:c.C1024G:p.P342A	SRP159481	Mammary Tumor
SRR7780771-SRR7780770	chr13	37741887	37741887	G	A	DGAT1	Missense_Mutation	ENSCAFT00000080218.1	exon17	c.C2060T	p.T687I	SNP	exonic	DGAT1		nonsynonymous SNV	DGAT1:ENSCAFT00000080218.1:exon17:c.C2060T:p.T687I	SRP159481	Mammary Tumor
SRR7780771-SRR7780770	chr13	46748482	46748482	G	A	PDGFRA	Missense_Mutation	ENSCAFT00000003270.4	exon7	c.G1181A	p.R394K	SNP	exonic	PDGFRA		nonsynonymous SNV	PDGFRA:ENSCAFT00000003270.4:exon7:c.G1181A:p.R394K,PDGFRA:ENSCAFT00000066115.1:exon7:c.G1688A:p.R563K,PDGFRA:ENSCAFT00000092330.1:exon7:c.G1106A:p.R369K	SRP159481	Mammary Tumor
SRR7780771-SRR7780770	chr21	26776332	26776332	C	T	TRIM21	Missense_Mutation	ENSCAFT00000093779.1	exon6	c.G1222A	p.G408R	SNP	exonic	TRIM21		nonsynonymous SNV	TRIM21:ENSCAFT00000093779.1:exon6:c.G1222A:p.G408R,TRIM21:ENSCAFT00000009720.4:exon7:c.G1318A:p.G440R	SRP159481	Mammary Tumor
SRR7780771-SRR7780770	chr30	8896228	8896228	G	C	SPTBN5	Missense_Mutation	ENSCAFT00000015654.4	exon33	c.C6055G	p.Q2019E	SNP	exonic	SPTBN5		nonsynonymous SNV	SPTBN5:ENSCAFT00000015654.4:exon33:c.C6055G:p.Q2019E	SRP159481	Mammary Tumor
SRR7780773-SRR7780772	chr23	8281575	8281575	C	A	SCN5A	Missense_Mutation	ENSCAFT00000048602.3	exon24	c.G5130T	p.K1710N	SNP	exonic	SCN5A		nonsynonymous SNV	SCN5A:ENSCAFT00000048602.3:exon24:c.G5130T:p.K1710N,SCN5A:ENSCAFT00000078113.1:exon26:c.G5553T:p.K1851N,SCN5A:ENSCAFT00000092899.1:exon26:c.G5451T:p.K1817N,SCN5A:ENSCAFT00000008132.4:exon27:c.G5607T:p.K1869N,SCN5A:ENSCAFT00000083140.1:exon27:c.G5607T:p.K1869N	SRP159481	Mammary Tumor
SRR7780773-SRR7780772	chr24	36428723	36428723	C	T	SLC9A8	Missense_Mutation	ENSCAFT00000018193.4	exon15	c.C1624T	p.R542W	SNP	exonic	SLC9A8		nonsynonymous SNV	SLC9A8:ENSCAFT00000018193.4:exon15:c.C1624T:p.R542W,SLC9A8:ENSCAFT00000085784.1:exon16:c.C1666T:p.R556W	SRP159481	Mammary Tumor
SRR7780773-SRR7780772	chr27	16836246	16836246	T	A	RESF1	Missense_Mutation	ENSCAFT00000016907.5	exon1	c.A2863T	p.N955Y	SNP	exonic	RESF1		nonsynonymous SNV	RESF1:ENSCAFT00000016907.5:exon1:c.A2863T:p.N955Y	SRP159481	Mammary Tumor
SRR7780773-SRR7780772	chr3	51814623	51814623	C	G	AEN	Missense_Mutation	ENSCAFT00000018286.4	exon2	c.C323G	p.S108C	SNP	exonic	AEN		nonsynonymous SNV	AEN:ENSCAFT00000018286.4:exon2:c.C323G:p.S108C,AEN:ENSCAFT00000047692.3:exon2:c.C542G:p.S181C	SRP159481	Mammary Tumor
SRR7780773-SRR7780772	chr34	30970907	30970907	G	T	BCHE	Missense_Mutation	ENSCAFT00000023011.4	exon2	c.C481A	p.L161M	SNP	exonic	BCHE		nonsynonymous SNV	BCHE:ENSCAFT00000023011.4:exon2:c.C481A:p.L161M	SRP159481	Mammary Tumor
SRR7780773-SRR7780772	chr5	56162873	56162873	G	A	SAMD11	Missense_Mutation	ENSCAFT00000030786.4	exon5	c.G353A	p.R118H	SNP	exonic	SAMD11		nonsynonymous SNV	SAMD11:ENSCAFT00000030786.4:exon5:c.G353A:p.R118H,SAMD11:ENSCAFT00000049070.3:exon5:c.G890A:p.R297H,SAMD11:ENSCAFT00000091126.1:exon5:c.G353A:p.R118H	SRP159481	Mammary Tumor
SRR7780773-SRR7780772	chr5	56271256	56271256	C	T	AGRN	Missense_Mutation	ENSCAFT00000030741.4	exon34	c.C5713T	p.R1905C	SNP	exonic	AGRN		nonsynonymous SNV	AGRN:ENSCAFT00000030741.4:exon34:c.C5713T:p.R1905C,AGRN:ENSCAFT00000061696.1:exon35:c.C5746T:p.R1916C,AGRN:ENSCAFT00000072551.1:exon36:c.C5443T:p.R1815C,AGRN:ENSCAFT00000060146.1:exon37:c.C5344T:p.R1782C	SRP159481	Mammary Tumor
SRR7780778-SRR7780779	chr10	27374309	27374309	G	A	IL2RB	Missense_Mutation	ENSCAFT00000002356.4	exon2	c.G61A	p.A21T	SNP	exonic	IL2RB		nonsynonymous SNV	IL2RB:ENSCAFT00000002356.4:exon2:c.G61A:p.A21T	SRP159481	Mammary Tumor
SRR7780778-SRR7780779	chr13	49131658	49131658	G	A	POLR2B	Missense_Mutation	ENSCAFT00000090830.1	exon19	c.G2602A	p.G868S	SNP	exonic	POLR2B		nonsynonymous SNV	POLR2B:ENSCAFT00000090830.1:exon19:c.G2602A:p.G868S,POLR2B:ENSCAFT00000003641.4:exon21:c.G3280A:p.G1094S,POLR2B:ENSCAFT00000074700.1:exon21:c.G2827A:p.G943S,POLR2B:ENSCAFT00000087521.1:exon22:c.G3184A:p.G1062S	SRP159481	Mammary Tumor
SRR7780778-SRR7780779	chr13	58123785	58123785	T	G	UBA6	Missense_Mutation	ENSCAFT00000078664.1	exon34	c.A3259C	p.I1087L	SNP	exonic	UBA6		nonsynonymous SNV	UBA6:ENSCAFT00000078664.1:exon34:c.A3259C:p.I1087L	SRP159481	Mammary Tumor
SRR7780778-SRR7780779	chr14	13043778	13043778	T	G	GRM3	Missense_Mutation	ENSCAFT00000046641.3	exon3	c.T2104G	p.W702G	SNP	exonic	GRM3		nonsynonymous SNV	GRM3:ENSCAFT00000046641.3:exon3:c.T2104G:p.W702G	SRP159481	Mammary Tumor
SRR7780778-SRR7780779	chr15	48540074	48540074	C	G	MAB21L2	Missense_Mutation	ENSCAFT00000012720.4	exon1	c.C120G	p.D40E	SNP	exonic	MAB21L2		nonsynonymous SNV	MAB21L2:ENSCAFT00000012720.4:exon1:c.C120G:p.D40E	SRP159481	Mammary Tumor
SRR7780778-SRR7780779	chr21	39784475	39784475	G	A	PIK3C2A	Missense_Mutation	ENSCAFT00000046875.2	exon1	c.C110T	p.A37V	SNP	exonic	PIK3C2A		nonsynonymous SNV	PIK3C2A:ENSCAFT00000046875.2:exon1:c.C110T:p.A37V,PIK3C2A:ENSCAFT00000049408.3:exon1:c.C110T:p.A37V,PIK3C2A:ENSCAFT00000061398.1:exon1:c.C110T:p.A37V,PIK3C2A:ENSCAFT00000070168.1:exon1:c.C110T:p.A37V,PIK3C2A:ENSCAFT00000080372.1:exon1:c.C110T:p.A37V	SRP159481	Mammary Tumor
SRR7780778-SRR7780779	chr24	33180904	33180904	G	A	NEURL2	Missense_Mutation	ENSCAFT00000015524.3	exon2	c.C803T	p.A268V	SNP	exonic	NEURL2		nonsynonymous SNV	NEURL2:ENSCAFT00000015524.3:exon2:c.C803T:p.A268V	SRP159481	Mammary Tumor
SRR7780778-SRR7780779	chr27	22261798	22261798	G	A	KRAS	Missense_Mutation	ENSCAFT00000010525.4	exon2	c.G317A	p.G106D	SNP	exonic	KRAS		nonsynonymous SNV	KRAS:ENSCAFT00000010525.4:exon2:c.G317A:p.G106D,KRAS:ENSCAFT00000093055.1:exon2:c.G317A:p.G106D	SRP159481	Mammary Tumor
SRR7780778-SRR7780779	chr29	18978323	18978323	C	A	SLCO5A1	Missense_Mutation	ENSCAFT00000012303.4	exon2	c.G924T	p.M308I	SNP	exonic	SLCO5A1		nonsynonymous SNV	SLCO5A1:ENSCAFT00000012303.4:exon2:c.G924T:p.M308I,SLCO5A1:ENSCAFT00000071015.1:exon2:c.G924T:p.M308I,SLCO5A1:ENSCAFT00000077834.1:exon2:c.G924T:p.M308I,SLCO5A1:ENSCAFT00000077924.1:exon2:c.G924T:p.M308I	SRP159481	Mammary Tumor
SRR7780778-SRR7780779	chr3	32444440	32444440	A	C	OCA2	Missense_Mutation	ENSCAFT00000083330.1	exon15	c.A1559C	p.K520T	SNP	exonic	OCA2		nonsynonymous SNV	OCA2:ENSCAFT00000083330.1:exon15:c.A1559C:p.K520T,OCA2:ENSCAFT00000015763.4:exon17:c.A1676C:p.K559T	SRP159481	Mammary Tumor
SRR7780778-SRR7780779	chr32	10285348	10285348	T	C	PTPN13	Missense_Mutation	ENSCAFT00000085989.1	exon24	c.T4058C	p.V1353A	SNP	exonic	PTPN13		nonsynonymous SNV	PTPN13:ENSCAFT00000085989.1:exon24:c.T4058C:p.V1353A,PTPN13:ENSCAFT00000067429.1:exon25:c.T4097C:p.V1366A,PTPN13:ENSCAFT00000074649.1:exon25:c.T4148C:p.V1383A,PTPN13:ENSCAFT00000084961.1:exon25:c.T4073C:p.V1358A,PTPN13:ENSCAFT00000087616.1:exon25:c.T4148C:p.V1383A,PTPN13:ENSCAFT00000014995.4:exon26:c.T4220C:p.V1407A,PTPN13:ENSCAFT00000063944.1:exon26:c.T4205C:p.V1402A,PTPN13:ENSCAFT00000083401.1:…	SRP159481	Mammary Tumor
SRR7780778-SRR7780779	chr34	12675674	12675674	A	T	PIK3CA	Missense_Mutation	ENSCAFT00000080543.1	exon20	c.A3140T	p.H1047L	SNP	exonic	PIK3CA		nonsynonymous SNV	PIK3CA:ENSCAFT00000080543.1:exon20:c.A3140T:p.H1047L	SRP159481	Mammary Tumor
SRR7780778-SRR7780779	chr9	4160750	4160750	G	A	ST6GALNAC2	Missense_Mutation	ENSCAFT00000008240.5	exon7	c.G664A	p.D222N	SNP	exonic	ST6GALNAC2		nonsynonymous SNV	ST6GALNAC2:ENSCAFT00000008240.5:exon7:c.G664A:p.D222N	SRP159481	Mammary Tumor
SRR7780778-SRR7780779	chr9	41516467	41516469	ACT	A	NF1	Missense_Mutation	ENSCAFT00000082664.1	exon35	c.A4632T	p.K1544N		exonic	NF1		nonsynonymous SNV	NF1:ENSCAFT00000082664.1:exon35:c.A4632T:p.K1544N,NF1:ENSCAFT00000029545.4:exon36:c.A5040T:p.K1680N,NF1:ENSCAFT00000079603.1:exon36:c.A5073T:p.K1691N,NF1:ENSCAFT00000046191.3:exon37:c.A5103T:p.K1701N	SRP159481	Mammary Tumor
SRR7780782-SRR7780783	chr19	18764471	18764471	G	A	QRFPR	Missense_Mutation	ENSCAFT00000006671.5	exon4	c.G658A	p.V220I	SNP	exonic	QRFPR		nonsynonymous SNV	QRFPR:ENSCAFT00000006671.5:exon4:c.G658A:p.V220I	SRP159481	Mammary Tumor
SRR7780782-SRR7780783	chr4	73873094	73873094	G	A	RXFP3	Missense_Mutation	ENSCAFT00000043044.2	exon1	c.C568T	p.L190F	SNP	exonic	RXFP3		nonsynonymous SNV	RXFP3:ENSCAFT00000043044.2:exon1:c.C568T:p.L190F	SRP159481	Mammary Tumor
SRR7780782-SRR7780783	chr9	32878132	32878132	C	T	MKS1	Missense_Mutation	ENSCAFT00000027676.4	exon2	c.G130A	p.V44I	SNP	exonic	MKS1		nonsynonymous SNV	MKS1:ENSCAFT00000027676.4:exon2:c.G130A:p.V44I,MKS1:ENSCAFT00000061279.1:exon2:c.G130A:p.V44I,MKS1:ENSCAFT00000070599.1:exon2:c.G130A:p.V44I,MKS1:ENSCAFT00000087145.1:exon2:c.G130A:p.V44I	SRP159481	Mammary Tumor
SRR7780786-SRR7780896	chr10	43242778	43242778	A	T	AFF3	Missense_Mutation	ENSCAFT00000071785.1	exon16	c.A2676T	p.L892F	SNP	exonic	AFF3		nonsynonymous SNV	AFF3:ENSCAFT00000071785.1:exon16:c.A2676T:p.L892F,AFF3:ENSCAFT00000003562.4:exon17:c.A2832T:p.L944F,AFF3:ENSCAFT00000087040.1:exon18:c.A2652T:p.L884F,AFF3:ENSCAFT00000077676.1:exon40:c.A3051T:p.L1017F	SRP159481	Mammary Tumor
SRR7780786-SRR7780896	chr12	48883541	48883541	C	A	MDN1	Missense_Mutation	ENSCAFT00000072786.1	exon78	c.G12767T	p.G4256V	SNP	exonic	MDN1		nonsynonymous SNV	MDN1:ENSCAFT00000072786.1:exon78:c.G12767T:p.G4256V,MDN1:ENSCAFT00000077930.1:exon78:c.G12731T:p.G4244V,MDN1:ENSCAFT00000091782.1:exon78:c.G12731T:p.G4244V,MDN1:ENSCAFT00000004993.5:exon79:c.G12929T:p.G4310V,MDN1:ENSCAFT00000048198.3:exon79:c.G12929T:p.G4310V	SRP159481	Mammary Tumor
SRR7780786-SRR7780896	chr2	80252373	80252373	G	A	IGSF21	Missense_Mutation	ENSCAFT00000043263.2	exon1	c.C337T	p.R113W	SNP	exonic	IGSF21		nonsynonymous SNV	IGSF21:ENSCAFT00000043263.2:exon1:c.C337T:p.R113W,IGSF21:ENSCAFT00000024719.5:exon2:c.C181T:p.R61W	SRP159481	Mammary Tumor
SRR7780786-SRR7780896	chr20	46647193	46647193	G	T	CYP4F22	Missense_Mutation	ENSCAFT00000025271.3	exon11	c.C1336A	p.P446T	SNP	exonic	CYP4F22		nonsynonymous SNV	CYP4F22:ENSCAFT00000025271.3:exon11:c.C1336A:p.P446T,CYP4F22:ENSCAFT00000064057.1:exon11:c.C1414A:p.P472T,CYP4F22:ENSCAFT00000082644.1:exon12:c.C1681A:p.P561T	SRP159481	Mammary Tumor
SRR7780786-SRR7780896	chr21	15626049	15626049	C	T	DLG2	Missense_Mutation	ENSCAFT00000060273.1	exon12	c.C1564T	p.L522F	SNP	exonic	DLG2		nonsynonymous SNV	DLG2:ENSCAFT00000060273.1:exon12:c.C1564T:p.L522F,DLG2:ENSCAFT00000007339.4:exon13:c.C1720T:p.L574F,DLG2:ENSCAFT00000064555.1:exon13:c.C1489T:p.L497F,DLG2:ENSCAFT00000085488.1:exon13:c.C1516T:p.L506F,DLG2:ENSCAFT00000085612.1:exon13:c.C1720T:p.L574F,DLG2:ENSCAFT00000068870.1:exon14:c.C1675T:p.L559F,DLG2:ENSCAFT00000082113.1:exon14:c.C1615T:p.L539F,DLG2:ENSCAFT00000067236.1:exon18:c.C2041T:p.L681F	SRP159481	Mammary Tumor
SRR7780786-SRR7780896	chr23	28241269	28241269	C	T	ASTE1	Missense_Mutation	ENSCAFT00000009866.3	exon2	c.G1312A	p.A438T	SNP	exonic	ASTE1		nonsynonymous SNV	ASTE1:ENSCAFT00000009866.3:exon2:c.G1312A:p.A438T,ASTE1:ENSCAFT00000069314.1:exon2:c.G1258A:p.A420T	SRP159481	Mammary Tumor
SRR7780786-SRR7780896	chr24	561276	561276	G	A	CD93	Missense_Mutation	ENSCAFT00000008304.3	exon1	c.G1252A	p.G418R	SNP	exonic	CD93		nonsynonymous SNV	CD93:ENSCAFT00000008304.3:exon1:c.G1252A:p.G418R	SRP159481	Mammary Tumor
SRR7780786-SRR7780896	chr24	39417268	39417268	A	G	ZNF217	Missense_Mutation	ENSCAFT00000018743.4	exon3	c.T1925C	p.V642A	SNP	exonic	ZNF217		nonsynonymous SNV	ZNF217:ENSCAFT00000018743.4:exon3:c.T1925C:p.V642A,ZNF217:ENSCAFT00000043771.3:exon4:c.T2042C:p.V681A,ZNF217:ENSCAFT00000047876.3:exon4:c.T2042C:p.V681A	SRP159481	Mammary Tumor
SRR7780786-SRR7780896	chr26	7963612	7963612	C	T	P2RX7	Missense_Mutation	ENSCAFT00000013356.3	exon5	c.G448A	p.G150R	SNP	exonic	P2RX7		nonsynonymous SNV	P2RX7:ENSCAFT00000013356.3:exon5:c.G448A:p.G150R	SRP159481	Mammary Tumor
SRR7780786-SRR7780896	chr28	31963831	31963831	C	A	BTBD16	Missense_Mutation	ENSCAFT00000019901.5	exon5	c.C416A	p.P139H	SNP	exonic	BTBD16		nonsynonymous SNV	BTBD16:ENSCAFT00000019901.5:exon5:c.C416A:p.P139H	SRP159481	Mammary Tumor
SRR7780786-SRR7780896	chr3	54892652	54892652	T	C	TM6SF1	Missense_Mutation	ENSCAFT00000020949.4	exon7	c.T697C	p.F233L	SNP	exonic	TM6SF1		nonsynonymous SNV	TM6SF1:ENSCAFT00000020949.4:exon7:c.T697C:p.F233L,TM6SF1:ENSCAFT00000068714.1:exon7:c.T697C:p.F233L	SRP159481	Mammary Tumor
SRR7780786-SRR7780896	chr36	4564179	4564179	T	C	PKP4	Missense_Mutation	ENSCAFT00000068812.1	exon16	c.T2692C	p.S898P	SNP	exonic	PKP4		nonsynonymous SNV	PKP4:ENSCAFT00000068812.1:exon16:c.T2692C:p.S898P,PKP4:ENSCAFT00000073298.1:exon16:c.T2758C:p.S920P,PKP4:ENSCAFT00000082575.1:exon16:c.T2794C:p.S932P,PKP4:ENSCAFT00000014902.4:exon17:c.T2881C:p.S961P,PKP4:ENSCAFT00000048677.3:exon18:c.T2794C:p.S932P,PKP4:ENSCAFT00000063245.1:exon18:c.T2791C:p.S931P,PKP4:ENSCAFT00000068276.1:exon18:c.T2791C:p.S931P,PKP4:ENSCAFT00000082186.1:exon18:c.T2794C:p.S932P…	SRP159481	Mammary Tumor
SRR7780786-SRR7780896	chr36	13977803	13977803	G	T	LRP2	Missense_Mutation	ENSCAFT00000019396.4	exon39	c.C7310A	p.S2437Y	SNP	exonic	LRP2		nonsynonymous SNV	LRP2:ENSCAFT00000019396.4:exon39:c.C7310A:p.S2437Y	SRP159481	Mammary Tumor
SRR7780786-SRR7780896	chr4	55890537	55890537	C	T	GRIA1	Missense_Mutation	ENSCAFT00000077757.1	exon10	c.G1256A	p.R419Q	SNP	exonic	GRIA1		nonsynonymous SNV	GRIA1:ENSCAFT00000077757.1:exon10:c.G1256A:p.R419Q,GRIA1:ENSCAFT00000086076.1:exon10:c.G1442A:p.R481Q,GRIA1:ENSCAFT00000028234.4:exon11:c.G1496A:p.R499Q,GRIA1:ENSCAFT00000073933.1:exon11:c.G1496A:p.R499Q,GRIA1:ENSCAFT00000028256.5:exon12:c.G1526A:p.R509Q	SRP159481	Mammary Tumor
SRR7780786-SRR7780896	chr6	48445726	48445726	G	A	OLFM3	Missense_Mutation	ENSCAFT00000031816.4	exon6	c.G800A	p.R267H	SNP	exonic	OLFM3		nonsynonymous SNV	OLFM3:ENSCAFT00000031816.4:exon6:c.G800A:p.R267H,OLFM3:ENSCAFT00000036455.4:exon6:c.G740A:p.R247H	SRP159481	Mammary Tumor
SRR7780786-SRR7780896	chr7	42192118	42192118	C	T	ASH1L	Missense_Mutation	ENSCAFT00000026816.5	exon10	c.C6328T	p.L2110F	SNP	exonic	ASH1L		nonsynonymous SNV	ASH1L:ENSCAFT00000026816.5:exon10:c.C6328T:p.L2110F	SRP159481	Mammary Tumor
SRR7780786-SRR7780896	chr9	60371928	60371928	T	C	LHX6	Missense_Mutation	ENSCAFT00000067225.1	exon8	c.T1117C	p.F373L	SNP	exonic	LHX6		nonsynonymous SNV	LHX6:ENSCAFT00000067225.1:exon8:c.T1117C:p.F373L,LHX6:ENSCAFT00000045524.3:exon9:c.T1171C:p.F391L	SRP159481	Mammary Tumor
SRR7780788-SRR7780791	chr10	1616135	1616135	C	T	MBD6	Missense_Mutation	ENSCAFT00000076735.1	exon5	c.C835T	p.R279C	SNP	exonic	MBD6		nonsynonymous SNV	MBD6:ENSCAFT00000076735.1:exon5:c.C835T:p.R279C,MBD6:ENSCAFT00000045386.2:exon6:c.C703T:p.R235C	SRP159481	Mammary Tumor
SRR7780788-SRR7780791	chr10	16785036	16785036	C	T	ODF3B	Missense_Mutation	ENSCAFT00000050040.2	exon4	c.C299T	p.P100L	SNP	exonic	ODF3B		nonsynonymous SNV	ODF3B:ENSCAFT00000050040.2:exon4:c.C299T:p.P100L	SRP159481	Mammary Tumor
SRR7780788-SRR7780791	chr2	58611182	58611182	G	A	CNGB1	Missense_Mutation	ENSCAFT00000013674.5	exon17	c.G1507A	p.A503T	SNP	exonic	CNGB1		nonsynonymous SNV	CNGB1:ENSCAFT00000013674.5:exon17:c.G1507A:p.A503T	SRP159481	Mammary Tumor
SRR7780788-SRR7780791	chr26	5493656	5493656	C	A	NCOR2	Missense_Mutation	ENSCAFT00000061352.1	exon36	c.C6182A	p.P2061H	SNP	exonic	NCOR2		nonsynonymous SNV	NCOR2:ENSCAFT00000061352.1:exon36:c.C6182A:p.P2061H,NCOR2:ENSCAFT00000081391.1:exon45:c.C7268A:p.P2423H,NCOR2:ENSCAFT00000048752.2:exon46:c.C7250A:p.P2417H,NCOR2:ENSCAFT00000093163.1:exon46:c.C7370A:p.P2457H,NCOR2:ENSCAFT00000011198.6:exon47:c.C7469A:p.P2490H	SRP159481	Mammary Tumor
SRR7780788-SRR7780791	chr32	8496704	8496704	C	A	WDFY3	Missense_Mutation	ENSCAFT00000045131.3	exon39	c.G6918T	p.W2306C	SNP	exonic	WDFY3		nonsynonymous SNV	WDFY3:ENSCAFT00000045131.3:exon39:c.G6918T:p.W2306C,WDFY3:ENSCAFT00000060833.1:exon39:c.G6867T:p.W2289C,WDFY3:ENSCAFT00000071436.1:exon39:c.G6714T:p.W2238C,WDFY3:ENSCAFT00000071781.1:exon39:c.G6837T:p.W2279C,WDFY3:ENSCAFT00000014761.4:exon40:c.G6921T:p.W2307C,WDFY3:ENSCAFT00000065696.1:exon40:c.G6921T:p.W2307C,WDFY3:ENSCAFT00000074071.1:exon41:c.G6816T:p.W2272C,WDFY3:ENSCAFT00000088737.1:exon41:c…	SRP159481	Mammary Tumor
SRR7780788-SRR7780791	chr32	32120521	32120521	C	T	AP1AR	Missense_Mutation	ENSCAFT00000061663.1	exon8	c.C488T	p.S163L	SNP	exonic	AP1AR		nonsynonymous SNV	AP1AR:ENSCAFT00000061663.1:exon8:c.C488T:p.S163L,AP1AR:ENSCAFT00000018483.4:exon9:c.C587T:p.S196L	SRP159481	Mammary Tumor
SRR7780788-SRR7780791	chr8	59294577	59294577	T	C	GALC	Missense_Mutation	ENSCAFT00000072434.1	exon6	c.A834G	p.I278M	SNP	exonic	GALC		nonsynonymous SNV	GALC:ENSCAFT00000072434.1:exon6:c.A834G:p.I278M,GALC:ENSCAFT00000065294.1:exon7:c.A804G:p.I268M,GALC:ENSCAFT00000071182.1:exon7:c.A804G:p.I268M,GALC:ENSCAFT00000027473.4:exon8:c.A873G:p.I291M,GALC:ENSCAFT00000036273.4:exon8:c.A885G:p.I295M	SRP159481	Mammary Tumor
SRR7780788-SRR7780791	chr9	5028097	5028097	G	A	CASKIN2	Missense_Mutation	ENSCAFT00000066269.1	exon14	c.G1450A	p.E484K	SNP	exonic	CASKIN2		nonsynonymous SNV	CASKIN2:ENSCAFT00000066269.1:exon14:c.G1450A:p.E484K,CASKIN2:ENSCAFT00000092308.1:exon15:c.G1570A:p.E524K,CASKIN2:ENSCAFT00000007714.4:exon16:c.G1633A:p.E545K,CASKIN2:ENSCAFT00000067487.1:exon18:c.G1792A:p.E598K	SRP159481	Mammary Tumor
SRR7780788-SRR7780791	chr9	41587184	41587184	C	G	NF1	Missense_Mutation	ENSCAFT00000082664.1	exon30	c.G3599C	p.R1200T	SNP	exonic	NF1		nonsynonymous SNV	NF1:ENSCAFT00000082664.1:exon30:c.G3599C:p.R1200T,NF1:ENSCAFT00000029545.4:exon31:c.G4007C:p.R1336T,NF1:ENSCAFT00000079603.1:exon31:c.G4040C:p.R1347T,NF1:ENSCAFT00000046191.3:exon32:c.G4070C:p.R1357T	SRP159481	Mammary Tumor
SRR7780788-SRR7780791	chr9	42836742	42836742	G	A	KIAA0100	Missense_Mutation	ENSCAFT00000029756.3	exon16	c.C3022T	p.R1008C	SNP	exonic	KIAA0100		nonsynonymous SNV	KIAA0100:ENSCAFT00000029756.3:exon16:c.C3022T:p.R1008C	SRP159481	Mammary Tumor
SRR7780792-SRR7780795	chr17	35505400	35505400	G	A	ACOXL	Missense_Mutation	ENSCAFT00000072248.1	exon13	c.G1304A	p.R435H	SNP	exonic	ACOXL		nonsynonymous SNV	ACOXL:ENSCAFT00000072248.1:exon13:c.G1304A:p.R435H,ACOXL:ENSCAFT00000011341.4:exon14:c.G1235A:p.R412H,ACOXL:ENSCAFT00000049359.3:exon15:c.G1472A:p.R491H,ACOXL:ENSCAFT00000068988.1:exon15:c.G1472A:p.R491H,ACOXL:ENSCAFT00000078619.1:exon15:c.G1472A:p.R491H,ACOXL:ENSCAFT00000092863.1:exon15:c.G1427A:p.R476H,ACOXL:ENSCAFT00000059999.1:exon16:c.G1544A:p.R515H	SRP159481	Mammary Tumor
SRR7780792-SRR7780795	chr18	37994688	37994688	C	T	OR5B2	Missense_Mutation	ENSCAFT00000042844.1	exon1	c.C365T	p.A122V	SNP	exonic	OR5B2		nonsynonymous SNV	OR5B2:ENSCAFT00000042844.1:exon1:c.C365T:p.A122V	SRP159481	Mammary Tumor
SRR7780792-SRR7780795	chr18	50792555	50792555	G	A	ACTN3	Missense_Mutation	ENSCAFT00000019966.4	exon12	c.C1684T	p.R562C	SNP	exonic	ACTN3		nonsynonymous SNV	ACTN3:ENSCAFT00000019966.4:exon12:c.C1684T:p.R562C	SRP159481	Mammary Tumor
SRR7780792-SRR7780795	chr24	37012446	37012446	G	C	RIPOR3	Missense_Mutation	ENSCAFT00000076387.1	exon14	c.C2626G	p.R876G	SNP	exonic	RIPOR3		nonsynonymous SNV	RIPOR3:ENSCAFT00000076387.1:exon14:c.C2626G:p.R876G,RIPOR3:ENSCAFT00000018338.4:exon15:c.C2776G:p.R926G,RIPOR3:ENSCAFT00000044498.3:exon16:c.C2011G:p.R671G,RIPOR3:ENSCAFT00000018344.6:exon17:c.C2056G:p.R686G	SRP159481	Mammary Tumor
SRR7780792-SRR7780795	chr27	22261798	22261798	G	T	KRAS	Missense_Mutation	ENSCAFT00000010525.4	exon2	c.G317T	p.G106V	SNP	exonic	KRAS		nonsynonymous SNV	KRAS:ENSCAFT00000010525.4:exon2:c.G317T:p.G106V,KRAS:ENSCAFT00000093055.1:exon2:c.G317T:p.G106V	SRP159481	Mammary Tumor
SRR7780792-SRR7780795	chr28	33808647	33808647	G	T	NKX1-2	Missense_Mutation	ENSCAFT00000044859.2	exon2	c.C827A	p.A276E	SNP	exonic	NKX1-2		nonsynonymous SNV	NKX1-2:ENSCAFT00000044859.2:exon2:c.C827A:p.A276E	SRP159481	Mammary Tumor
SRR7780792-SRR7780795	chr4	75420537	75420537	G	C	PDZD2	Missense_Mutation	ENSCAFT00000030044.4	exon5	c.C1131G	p.H377Q	SNP	exonic	PDZD2		nonsynonymous SNV	PDZD2:ENSCAFT00000030044.4:exon5:c.C1131G:p.H377Q,PDZD2:ENSCAFT00000047348.3:exon5:c.C1113G:p.H371Q	SRP159481	Mammary Tumor
SRR7780792-SRR7780795	chr5	32962473	32962473	C	T	PER1	Missense_Mutation	ENSCAFT00000026906.5	exon17	c.G2122A	p.A708T	SNP	exonic	PER1		nonsynonymous SNV	PER1:ENSCAFT00000026906.5:exon17:c.G2122A:p.A708T,PER1:ENSCAFT00000073563.1:exon17:c.G2122A:p.A708T	SRP159481	Mammary Tumor
SRR7780792-SRR7780795	chr8	72326481	72326481	C	T	AKT1	Missense_Mutation	ENSCAFT00000029177.4	exon2	c.G49A	p.E17K	SNP	exonic	AKT1		nonsynonymous SNV	AKT1:ENSCAFT00000029177.4:exon2:c.G49A:p.E17K,AKT1:ENSCAFT00000066075.1:exon2:c.G49A:p.E17K	SRP159481	Mammary Tumor
SRR7780794-SRR7780787	chr20	37047165	37047165	G	A	ITIH1	Missense_Mutation	ENSCAFT00000063485.1	exon7	c.C836T	p.T279M	SNP	exonic	ITIH1		nonsynonymous SNV	ITIH1:ENSCAFT00000063485.1:exon7:c.C836T:p.T279M,ITIH1:ENSCAFT00000089467.1:exon7:c.C731T:p.T244M,ITIH1:ENSCAFT00000014114.4:exon8:c.C857T:p.T286M,ITIH1:ENSCAFT00000062189.1:exon8:c.C857T:p.T286M,ITIH1:ENSCAFT00000076547.1:exon8:c.C857T:p.T286M,ITIH1:ENSCAFT00000081514.1:exon8:c.C611T:p.T204M	SRP159481	Mammary Tumor
SRR7780794-SRR7780787	chr34	12675674	12675674	A	G	PIK3CA	Missense_Mutation	ENSCAFT00000080543.1	exon20	c.A3140G	p.H1047R	SNP	exonic	PIK3CA		nonsynonymous SNV	PIK3CA:ENSCAFT00000080543.1:exon20:c.A3140G:p.H1047R	SRP159481	Mammary Tumor
SRR7780794-SRR7780787	chr35	26230163	26230163	C	A	GABBR1	Missense_Mutation	ENSCAFT00000072174.1	exon2	c.G161T	p.G54V	SNP	exonic	GABBR1		nonsynonymous SNV	GABBR1:ENSCAFT00000072174.1:exon2:c.G161T:p.G54V,GABBR1:ENSCAFT00000060717.1:exon3:c.G299T:p.G100V,GABBR1:ENSCAFT00000019339.4:exon4:c.G485T:p.G162V	SRP159481	Mammary Tumor
SRR7780802-SRR7780803	chr10	1173393	1173393	C	T	MYO1A	Missense_Mutation	ENSCAFT00000000253.4	exon24	c.G2551A	p.E851K	SNP	exonic	MYO1A		nonsynonymous SNV	MYO1A:ENSCAFT00000000253.4:exon24:c.G2551A:p.E851K,MYO1A:ENSCAFT00000048971.3:exon24:c.G2551A:p.E851K,MYO1A:ENSCAFT00000070211.1:exon24:c.G2551A:p.E851K	SRP159481	Mammary Tumor
SRR7780802-SRR7780803	chr11	26046496	26046496	C	T	EGR1	Missense_Mutation	ENSCAFT00000001962.5	exon1	c.C269T	p.A90V	SNP	exonic	EGR1		nonsynonymous SNV	EGR1:ENSCAFT00000001962.5:exon1:c.C269T:p.A90V	SRP159481	Mammary Tumor
SRR7780802-SRR7780803	chr12	7786635	7786635	T	G	DNAH8	Missense_Mutation	ENSCAFT00000049946.2	exon45	c.T5757G	p.I1919M	SNP	exonic	DNAH8		nonsynonymous SNV	DNAH8:ENSCAFT00000049946.2:exon45:c.T5757G:p.I1919M	SRP159481	Mammary Tumor
SRR7780802-SRR7780803	chr13	38763183	38763183	G	A	LIMCH1	Missense_Mutation	ENSCAFT00000075768.1	exon10	c.G1591A	p.V531I	SNP	exonic	LIMCH1		nonsynonymous SNV	LIMCH1:ENSCAFT00000075768.1:exon10:c.G1591A:p.V531I,LIMCH1:ENSCAFT00000002813.4:exon11:c.G1612A:p.V538I,LIMCH1:ENSCAFT00000059651.1:exon11:c.G2353A:p.V785I,LIMCH1:ENSCAFT00000077377.1:exon11:c.G1558A:p.V520I,LIMCH1:ENSCAFT00000089680.1:exon11:c.G1549A:p.V517I,LIMCH1:ENSCAFT00000092326.1:exon12:c.G1594A:p.V532I,LIMCH1:ENSCAFT00000093072.1:exon12:c.G1402A:p.V468I,LIMCH1:ENSCAFT00000002810.5:exon14:…	SRP159481	Mammary Tumor
SRR7780802-SRR7780803	chr15	15661367	15661367	G	A	TMEM53	Missense_Mutation	ENSCAFT00000037053.2	exon3	c.G445A	p.D149N	SNP	exonic	TMEM53		nonsynonymous SNV	TMEM53:ENSCAFT00000037053.2:exon3:c.G445A:p.D149N,TMEM53:ENSCAFT00000046361.2:exon3:c.G445A:p.D149N	SRP159481	Mammary Tumor
SRR7780802-SRR7780803	chr15	50194595	50194595	C	G	FBXW7	Missense_Mutation	ENSCAFT00000012962.5	exon8	c.G1535C	p.R512P	SNP	exonic	FBXW7		nonsynonymous SNV	FBXW7:ENSCAFT00000012962.5:exon8:c.G1535C:p.R512P,FBXW7:ENSCAFT00000065773.1:exon8:c.G1154C:p.R385P,FBXW7:ENSCAFT00000074984.1:exon8:c.G1040C:p.R347P	SRP159481	Mammary Tumor
SRR7780802-SRR7780803	chr20	55244906	55244906	C	T	UBXN6	Missense_Mutation	ENSCAFT00000030269.4	exon8	c.C655T	p.R219C	SNP	exonic	UBXN6		nonsynonymous SNV	UBXN6:ENSCAFT00000030269.4:exon8:c.C655T:p.R219C	SRP159481	Mammary Tumor
SRR7780802-SRR7780803	chr30	9699245	9699245	C	T	TTBK2	Missense_Mutation	ENSCAFT00000069207.1	exon10	c.G1052A	p.G351E	SNP	exonic	TTBK2		nonsynonymous SNV	TTBK2:ENSCAFT00000069207.1:exon10:c.G1052A:p.G351E,TTBK2:ENSCAFT00000069490.1:exon10:c.G1013A:p.G338E,TTBK2:ENSCAFT00000017853.4:exon11:c.G1118A:p.G373E,TTBK2:ENSCAFT00000079298.1:exon11:c.G1118A:p.G373E	SRP159481	Mammary Tumor
SRR7780802-SRR7780803	chr34	12675674	12675674	A	G	PIK3CA	Missense_Mutation	ENSCAFT00000080543.1	exon20	c.A3140G	p.H1047R	SNP	exonic	PIK3CA		nonsynonymous SNV	PIK3CA:ENSCAFT00000080543.1:exon20:c.A3140G:p.H1047R	SRP159481	Mammary Tumor
SRR7780802-SRR7780803	chr6	11848693	11848693	A	G	GRID2IP	Missense_Mutation	ENSCAFT00000061830.1	exon6	c.T580C	p.S194P	SNP	exonic	GRID2IP		nonsynonymous SNV	GRID2IP:ENSCAFT00000061830.1:exon6:c.T580C:p.S194P,GRID2IP:ENSCAFT00000024965.4:exon7:c.T1129C:p.S377P	SRP159481	Mammary Tumor
SRR7780807-SRR7780755	chr14	1419704	1419704	A	G	OR2L5C	Missense_Mutation	ENSCAFT00000001863.3	exon1	c.T608C	p.I203T	SNP	exonic	OR2L5C		nonsynonymous SNV	OR2L5C:ENSCAFT00000001863.3:exon1:c.T608C:p.I203T	SRP159481	Mammary Tumor
SRR7780807-SRR7780755	chr14	8064106	8064106	A	T	RBM28	Missense_Mutation	ENSCAFT00000090023.1	exon10	c.A1015T	p.R339W	SNP	exonic	RBM28		nonsynonymous SNV	RBM28:ENSCAFT00000090023.1:exon10:c.A1015T:p.R339W,RBM28:ENSCAFT00000002617.5:exon14:c.A1438T:p.R480W	SRP159481	Mammary Tumor
SRR7780807-SRR7780755	chr16	22948412	22948412	C	A	THAP1	Missense_Mutation	ENSCAFT00000008714.5	exon3	c.C638A	p.A213E	SNP	exonic	THAP1		nonsynonymous SNV	THAP1:ENSCAFT00000008714.5:exon3:c.C638A:p.A213E,THAP1:ENSCAFT00000048455.2:exon3:c.C737A:p.A246E,THAP1:ENSCAFT00000069903.1:exon3:c.C650A:p.A217E,THAP1:ENSCAFT00000074413.1:exon3:c.C620A:p.A207E,THAP1:ENSCAFT00000082017.1:exon3:c.C593A:p.A198E	SRP159481	Mammary Tumor
SRR7780807-SRR7780755	chr17	34215273	34215273	C	T	MTA3	Missense_Mutation	ENSCAFT00000067583.1	exon5	c.C566T	p.P189L	SNP	exonic	MTA3		nonsynonymous SNV	MTA3:ENSCAFT00000067583.1:exon5:c.C566T:p.P189L,MTA3:ENSCAFT00000010542.4:exon6:c.C1022T:p.P341L,MTA3:ENSCAFT00000066188.1:exon6:c.C488T:p.P163L	SRP159481	Mammary Tumor
SRR7780807-SRR7780755	chr17	34534783	34534783	G	T	STARD7	Missense_Mutation	ENSCAFT00000035917.3	exon2	c.G231T	p.L77F	SNP	exonic	STARD7		nonsynonymous SNV	STARD7:ENSCAFT00000035917.3:exon2:c.G231T:p.L77F	SRP159481	Mammary Tumor
SRR7780807-SRR7780755	chr26	37886071	37886071	T	G	PTEN	Missense_Mutation	ENSCAFT00000024821.4	exon4	c.T239G	p.L80R	SNP	exonic	PTEN		nonsynonymous SNV	PTEN:ENSCAFT00000024821.4:exon4:c.T239G:p.L80R,PTEN:ENSCAFT00000087317.1:exon8:c.T335G:p.L112R	SRP159481	Mammary Tumor
SRR7780807-SRR7780755	chr28	15932941	15932941	G	A	NEURL1	Missense_Mutation	ENSCAFT00000016617.6	exon5	c.G1501A	p.G501R	SNP	exonic	NEURL1		nonsynonymous SNV	NEURL1:ENSCAFT00000016617.6:exon5:c.G1501A:p.G501R,NEURL1:ENSCAFT00000048537.2:exon5:c.G1450A:p.G484R,NEURL1:ENSCAFT00000073641.1:exon5:c.G1483A:p.G495R,NEURL1:ENSCAFT00000071894.1:exon6:c.G1504A:p.G502R	SRP159481	Mammary Tumor
SRR7780807-SRR7780755	chr29	27420161	27420161	C	T	TPD52	Missense_Mutation	ENSCAFT00000079913.1	exon5	c.G916A	p.V306I	SNP	exonic	TPD52		nonsynonymous SNV	TPD52:ENSCAFT00000079913.1:exon5:c.G916A:p.V306I,TPD52:ENSCAFT00000065147.1:exon6:c.G679A:p.V227I,TPD52:ENSCAFT00000066514.1:exon6:c.G541A:p.V181I,TPD52:ENSCAFT00000075073.1:exon6:c.G625A:p.V209I,TPD52:ENSCAFT00000093334.1:exon6:c.G985A:p.V329I,TPD52:ENSCAFT00000013352.4:exon7:c.G706A:p.V236I,TPD52:ENSCAFT00000077929.1:exon7:c.G1027A:p.V343I	SRP159481	Mammary Tumor
SRR7780807-SRR7780755	chr34	12675674	12675674	A	G	PIK3CA	Missense_Mutation	ENSCAFT00000080543.1	exon20	c.A3140G	p.H1047R	SNP	exonic	PIK3CA		nonsynonymous SNV	PIK3CA:ENSCAFT00000080543.1:exon20:c.A3140G:p.H1047R	SRP159481	Mammary Tumor
SRR7780807-SRR7780755	chr8	945556	945556	T	A	CATSPERB	Missense_Mutation	ENSCAFT00000017205.4	exon17	c.A2011T	p.I671F	SNP	exonic	CATSPERB		nonsynonymous SNV	CATSPERB:ENSCAFT00000017205.4:exon17:c.A2011T:p.I671F,CATSPERB:ENSCAFT00000065849.1:exon19:c.A2062T:p.I688F,CATSPERB:ENSCAFT00000080257.1:exon19:c.A2062T:p.I688F	SRP159481	Mammary Tumor
SRR7780810-SRR7780811	chr1	102262463	102262463	G	C	SHISA7	Missense_Mutation	ENSCAFT00000045226.3	exon3	c.G506C	p.R169P	SNP	exonic	SHISA7		nonsynonymous SNV	SHISA7:ENSCAFT00000045226.3:exon3:c.G506C:p.R169P,SHISA7:ENSCAFT00000049048.2:exon3:c.G506C:p.R169P	SRP159481	Mammary Tumor
SRR7780810-SRR7780811	chr1	105160293	105160293	G	T	ZNF615	Missense_Mutation	ENSCAFT00000065282.1	exon4	c.C622A	p.H208N	SNP	exonic	ZNF615		nonsynonymous SNV	ZNF615:ENSCAFT00000065282.1:exon4:c.C622A:p.H208N,ZNF615:ENSCAFT00000043215.2:exon5:c.C580A:p.H194N	SRP159481	Mammary Tumor
SRR7780810-SRR7780811	chr10	28783804	28783804	C	T	TOM1	Missense_Mutation	ENSCAFT00000077340.1	exon14	c.G1216A	p.A406T	SNP	exonic	TOM1		nonsynonymous SNV	TOM1:ENSCAFT00000077340.1:exon14:c.G1216A:p.A406T,TOM1:ENSCAFT00000002700.4:exon16:c.G1405A:p.A469T	SRP159481	Mammary Tumor
SRR7780810-SRR7780811	chr11	41566622	41566622	G	A	DMRTA1	Missense_Mutation	ENSCAFT00000002633.4	exon1	c.G449A	p.S150N	SNP	exonic	DMRTA1		nonsynonymous SNV	DMRTA1:ENSCAFT00000002633.4:exon1:c.G449A:p.S150N	SRP159481	Mammary Tumor
SRR7780810-SRR7780811	chr11	52335601	52335601	G	A	NPR2	Missense_Mutation	ENSCAFT00000081068.1	exon13	c.G1844A	p.R615Q	SNP	exonic	NPR2		nonsynonymous SNV	NPR2:ENSCAFT00000081068.1:exon13:c.G1844A:p.R615Q,NPR2:ENSCAFT00000088134.1:exon13:c.G1793A:p.R598Q,NPR2:ENSCAFT00000080136.1:exon14:c.G1958A:p.R653Q,NPR2:ENSCAFT00000003506.7:exon15:c.G2006A:p.R669Q,NPR2:ENSCAFT00000027767.4:exon15:c.G1691A:p.R564Q,NPR2:ENSCAFT00000077701.1:exon16:c.G2036A:p.R679Q	SRP159481	Mammary Tumor
SRR7780810-SRR7780811	chr13	5226239	5226239	T	G	RIMS2	Missense_Mutation	ENSCAFT00000077730.1	exon10	c.T2033G	p.V678G	SNP	exonic	RIMS2		nonsynonymous SNV	RIMS2:ENSCAFT00000077730.1:exon10:c.T2033G:p.V678G,RIMS2:ENSCAFT00000001036.4:exon12:c.T1850G:p.V617G,RIMS2:ENSCAFT00000047827.3:exon12:c.T2468G:p.V823G,RIMS2:ENSCAFT00000062317.1:exon12:c.T2468G:p.V823G,RIMS2:ENSCAFT00000070022.1:exon12:c.T2078G:p.V693G,RIMS2:ENSCAFT00000082731.1:exon13:c.T2516G:p.V839G	SRP159481	Mammary Tumor
SRR7780810-SRR7780811	chr14	56398370	56398370	T	A	CFTR	Missense_Mutation	ENSCAFT00000074449.1	exon13	c.T1711A	p.S571T	SNP	exonic	CFTR		nonsynonymous SNV	CFTR:ENSCAFT00000074449.1:exon13:c.T1711A:p.S571T,CFTR:ENSCAFT00000059721.1:exon17:c.T2920A:p.S974T,CFTR:ENSCAFT00000062415.1:exon17:c.T2749A:p.S917T,CFTR:ENSCAFT00000063866.1:exon17:c.T2740A:p.S914T,CFTR:ENSCAFT00000005518.4:exon18:c.T2932A:p.S978T,CFTR:ENSCAFT00000062635.1:exon18:c.T2932A:p.S978T	SRP159481	Mammary Tumor
SRR7780810-SRR7780811	chr17	15579543	15579543	G	A	HS1BP3	Missense_Mutation	ENSCAFT00000006195.4	exon7	c.C1049T	p.A350V	SNP	exonic	HS1BP3		nonsynonymous SNV	HS1BP3:ENSCAFT00000006195.4:exon7:c.C1049T:p.A350V,HS1BP3:ENSCAFT00000046794.3:exon7:c.C1112T:p.A371V	SRP159481	Mammary Tumor
SRR7780810-SRR7780811	chr20	37381674	37381674	C	T	DNAH1	Missense_Mutation	ENSCAFT00000061054.1	exon48	c.G7978A	p.G2660S	SNP	exonic	DNAH1		nonsynonymous SNV	DNAH1:ENSCAFT00000061054.1:exon48:c.G7978A:p.G2660S,DNAH1:ENSCAFT00000015444.4:exon49:c.G8017A:p.G2673S,DNAH1:ENSCAFT00000064634.1:exon50:c.G7780A:p.G2594S	SRP159481	Mammary Tumor
SRR7780810-SRR7780811	chr20	40709975	40709975	C	A	FBXW12	Missense_Mutation	ENSCAFT00000020438.4	exon2	c.G128T	p.R43M	SNP	exonic	FBXW12		nonsynonymous SNV	FBXW12:ENSCAFT00000020438.4:exon2:c.G128T:p.R43M,FBXW12:ENSCAFT00000087382.1:exon2:c.G128T:p.R43M	SRP159481	Mammary Tumor
SRR7780810-SRR7780811	chr20	52215069	52215069	G	A	ARHGEF18	Missense_Mutation	ENSCAFT00000028939.5	exon3	c.G364A	p.D122N	SNP	exonic	ARHGEF18		nonsynonymous SNV	ARHGEF18:ENSCAFT00000028939.5:exon3:c.G364A:p.D122N	SRP159481	Mammary Tumor
SRR7780810-SRR7780811	chr20	53892836	53892836	C	G	MLLT1	Missense_Mutation	ENSCAFT00000029664.4	exon4	c.C187G	p.P63A	SNP	exonic	MLLT1		nonsynonymous SNV	MLLT1:ENSCAFT00000029664.4:exon4:c.C187G:p.P63A,MLLT1:ENSCAFT00000061698.1:exon4:c.C298G:p.P100A	SRP159481	Mammary Tumor
SRR7780810-SRR7780811	chr24	46721675	46721675	G	C	DIDO1	Missense_Mutation	ENSCAFT00000020204.5	exon4	c.C559G	p.R187G	SNP	exonic	DIDO1		nonsynonymous SNV	DIDO1:ENSCAFT00000020204.5:exon4:c.C559G:p.R187G,DIDO1:ENSCAFT00000038284.3:exon4:c.C514G:p.R172G	SRP159481	Mammary Tumor
SRR7780810-SRR7780811	chr25	40642892	40642892	A	C	SPHKAP	Missense_Mutation	ENSCAFT00000070819.1	exon8	c.T4615G	p.W1539G	SNP	exonic	SPHKAP		nonsynonymous SNV	SPHKAP:ENSCAFT00000070819.1:exon8:c.T4615G:p.W1539G,SPHKAP:ENSCAFT00000076876.1:exon9:c.T4624G:p.W1542G,SPHKAP:ENSCAFT00000059652.1:exon11:c.T4912G:p.W1638G,SPHKAP:ENSCAFT00000072137.1:exon11:c.T4885G:p.W1629G,SPHKAP:ENSCAFT00000076134.1:exon11:c.T4786G:p.W1596G,SPHKAP:ENSCAFT00000016740.4:exon12:c.T4924G:p.W1642G,SPHKAP:ENSCAFT00000063400.1:exon12:c.T4972G:p.W1658G,SPHKAP:ENSCAFT00000079883.1:ex…	SRP159481	Mammary Tumor
SRR7780810-SRR7780811	chr26	24099625	24099625	G	C	SMTN	Missense_Mutation	ENSCAFT00000072380.1	exon11	c.G1864C	p.E622Q	SNP	exonic	SMTN		nonsynonymous SNV	SMTN:ENSCAFT00000072380.1:exon11:c.G1864C:p.E622Q,SMTN:ENSCAFT00000089421.1:exon11:c.G1864C:p.E622Q,SMTN:ENSCAFT00000093348.1:exon11:c.G1864C:p.E622Q,SMTN:ENSCAFT00000020558.4:exon12:c.G1687C:p.E563Q,SMTN:ENSCAFT00000065033.1:exon12:c.G1774C:p.E592Q,SMTN:ENSCAFT00000077393.1:exon12:c.G1702C:p.E568Q,SMTN:ENSCAFT00000089815.1:exon12:c.G1957C:p.E653Q,SMTN:ENSCAFT00000063555.1:exon13:c.G1867C:p.E623Q	SRP159481	Mammary Tumor
SRR7780810-SRR7780811	chr27	40235866	40235866	A	T	AKAP3	Missense_Mutation	ENSCAFT00000044162.2	exon4	c.A1015T	p.M339L	SNP	exonic	AKAP3		nonsynonymous SNV	AKAP3:ENSCAFT00000044162.2:exon4:c.A1015T:p.M339L	SRP159481	Mammary Tumor
SRR7780810-SRR7780811	chr3	58398538	58398538	C	A	DNAJA4	Missense_Mutation	ENSCAFT00000022568.4	exon6	c.C1017A	p.H339Q	SNP	exonic	DNAJA4		nonsynonymous SNV	DNAJA4:ENSCAFT00000022568.4:exon6:c.C1017A:p.H339Q	SRP159481	Mammary Tumor
SRR7780810-SRR7780811	chr30	29967910	29967910	T	C	SLC24A1	Missense_Mutation	ENSCAFT00000027314.4	exon1	c.T149C	p.L50S	SNP	exonic	SLC24A1		nonsynonymous SNV	SLC24A1:ENSCAFT00000027314.4:exon1:c.T149C:p.L50S	SRP159481	Mammary Tumor
SRR7780810-SRR7780811	chr5	32564027	32564027	G	A	TP53	Missense_Mutation	ENSCAFT00000086831.1	exon3	c.C305T	p.A102V	SNP	exonic	TP53		nonsynonymous SNV	TP53:ENSCAFT00000086831.1:exon3:c.C305T:p.A102V,TP53:ENSCAFT00000026465.4:exon5:c.C374T:p.A125V,TP53:ENSCAFT00000081814.1:exon5:c.C566T:p.A189V	SRP159481	Mammary Tumor
SRR7780810-SRR7780811	chr9	47302675	47302675	G	A	OR1R1	Missense_Mutation	ENSCAFT00000030696.3	exon1	c.G898A	p.A300T	SNP	exonic	OR1R1		nonsynonymous SNV	OR1R1:ENSCAFT00000030696.3:exon1:c.G898A:p.A300T	SRP159481	Mammary Tumor
SRR7780812-SRR7780813	chr14	2848342	2848342	A	G	OR2G6	Missense_Mutation	ENSCAFT00000037587.3	exon1	c.A88G	p.I30V	SNP	exonic	OR2G6		nonsynonymous SNV	OR2G6:ENSCAFT00000037587.3:exon1:c.A88G:p.I30V	SRP159481	Mammary Tumor
SRR7780812-SRR7780813	chr23	13037907	13037907	C	T	STT3B	Missense_Mutation	ENSCAFT00000008731.5	exon16	c.G2417A	p.R806H	SNP	exonic	STT3B		nonsynonymous SNV	STT3B:ENSCAFT00000008731.5:exon16:c.G2417A:p.R806H	SRP159481	Mammary Tumor
SRR7780812-SRR7780813	chr27	22261797	22261797	G	A	KRAS	Missense_Mutation	ENSCAFT00000010525.4	exon2	c.G316A	p.G106S	SNP	exonic	KRAS		nonsynonymous SNV	KRAS:ENSCAFT00000010525.4:exon2:c.G316A:p.G106S,KRAS:ENSCAFT00000093055.1:exon2:c.G316A:p.G106S	SRP159481	Mammary Tumor
SRR7780812-SRR7780813	chr37	25022343	25022343	A	G	CATIP	Missense_Mutation	ENSCAFT00000081767.1	exon2	c.A403G	p.M135V	SNP	exonic	CATIP		nonsynonymous SNV	CATIP:ENSCAFT00000081767.1:exon2:c.A403G:p.M135V,CATIP:ENSCAFT00000045417.2:exon3:c.A241G:p.M81V	SRP159481	Mammary Tumor
SRR7780812-SRR7780813	chr5	26254764	26254764	G	A	MSANTD4	Missense_Mutation	ENSCAFT00000050144.2	exon2	c.G328A	p.D110N	SNP	exonic	MSANTD4		nonsynonymous SNV	MSANTD4:ENSCAFT00000050144.2:exon2:c.G328A:p.D110N	SRP159481	Mammary Tumor
SRR7780812-SRR7780813	chr8	38561480	38561480	G	A	SYNE2	Missense_Mutation	ENSCAFT00000071827.1	exon71	c.G13555A	p.D4519N	SNP	exonic	SYNE2		nonsynonymous SNV	SYNE2:ENSCAFT00000071827.1:exon71:c.G13555A:p.D4519N,SYNE2:ENSCAFT00000084224.1:exon71:c.G13624A:p.D4542N,SYNE2:ENSCAFT00000086166.1:exon71:c.G13528A:p.D4510N,SYNE2:ENSCAFT00000088554.1:exon71:c.G13609A:p.D4537N,SYNE2:ENSCAFT00000089121.1:exon71:c.G13579A:p.D4527N,SYNE2:ENSCAFT00000093800.1:exon71:c.G12991A:p.D4331N,SYNE2:ENSCAFT00000025088.4:exon72:c.G13711A:p.D4571N,SYNE2:ENSCAFT00000066626.1:e…	SRP159481	Mammary Tumor
SRR7780812-SRR7780813	chr8	72326481	72326481	C	T	AKT1	Missense_Mutation	ENSCAFT00000029177.4	exon2	c.G49A	p.E17K	SNP	exonic	AKT1		nonsynonymous SNV	AKT1:ENSCAFT00000029177.4:exon2:c.G49A:p.E17K,AKT1:ENSCAFT00000066075.1:exon2:c.G49A:p.E17K	SRP159481	Mammary Tumor
SRR7780814-SRR7780815	chr12	19606028	19606028	T	A	PKHD1	Missense_Mutation	ENSCAFT00000003416.4	exon35	c.A5819T	p.D1940V	SNP	exonic	PKHD1		nonsynonymous SNV	PKHD1:ENSCAFT00000003416.4:exon35:c.A5819T:p.D1940V	SRP159481	Mammary Tumor
SRR7780814-SRR7780815	chr17	59529048	59529048	C	A	CIART	Missense_Mutation	ENSCAFT00000018735.4	exon5	c.C804A	p.N268K	SNP	exonic	CIART		nonsynonymous SNV	CIART:ENSCAFT00000018735.4:exon5:c.C804A:p.N268K	SRP159481	Mammary Tumor
SRR7780814-SRR7780815	chr18	8283300	8283300	A	G	INHBA	Missense_Mutation	ENSCAFT00000005699.5	exon2	c.A781G	p.K261E	SNP	exonic	INHBA		nonsynonymous SNV	INHBA:ENSCAFT00000005699.5:exon2:c.A781G:p.K261E	SRP159481	Mammary Tumor
SRR7780814-SRR7780815	chr18	39867378	39867378	G	A	OR5T8	Missense_Mutation	ENSCAFT00000012902.4	exon1	c.C134T	p.A45V	SNP	exonic	OR5T8		nonsynonymous SNV	OR5T8:ENSCAFT00000012902.4:exon1:c.C134T:p.A45V	SRP159481	Mammary Tumor
SRR7780814-SRR7780815	chr18	53709613	53709613	G	A	SLC22A8	Missense_Mutation	ENSCAFT00000024505.4	exon1	c.G23A	p.R8K	SNP	exonic	SLC22A8		nonsynonymous SNV	SLC22A8:ENSCAFT00000024505.4:exon1:c.G23A:p.R8K	SRP159481	Mammary Tumor
SRR7780814-SRR7780815	chr21	27326637	27326637	T	A	OR51A6	Missense_Mutation	ENSCAFT00000038709.3	exon1	c.A701T	p.E234V	SNP	exonic	OR51A6		nonsynonymous SNV	OR51A6:ENSCAFT00000038709.3:exon1:c.A701T:p.E234V	SRP159481	Mammary Tumor
SRR7780814-SRR7780815	chr26	17546276	17546276	G	A	UBE3B	Missense_Mutation	ENSCAFT00000059629.1	exon27	c.C3025T	p.R1009W	SNP	exonic	UBE3B		nonsynonymous SNV	UBE3B:ENSCAFT00000059629.1:exon27:c.C3025T:p.R1009W,UBE3B:ENSCAFT00000069803.1:exon27:c.C2947T:p.R983W,UBE3B:ENSCAFT00000079721.1:exon27:c.C2980T:p.R994W,UBE3B:ENSCAFT00000017297.4:exon28:c.C3085T:p.R1029W,UBE3B:ENSCAFT00000079868.1:exon28:c.C3085T:p.R1029W,UBE3B:ENSCAFT00000083600.1:exon28:c.C3085T:p.R1029W,UBE3B:ENSCAFT00000089267.1:exon28:c.C3085T:p.R1029W	SRP159481	Mammary Tumor
SRR7780814-SRR7780815	chr33	27893392	27893392	C	A	ITGB5	Missense_Mutation	ENSCAFT00000019852.4	exon3	c.G356T	p.R119L	SNP	exonic	ITGB5		nonsynonymous SNV	ITGB5:ENSCAFT00000019852.4:exon3:c.G356T:p.R119L,ITGB5:ENSCAFT00000043921.3:exon3:c.G356T:p.R119L,ITGB5:ENSCAFT00000091207.1:exon3:c.G356T:p.R119L	SRP159481	Mammary Tumor
SRR7780814-SRR7780815	chr37	8605901	8605901	G	A	SATB2	Missense_Mutation	ENSCAFT00000017482.4	exon6	c.C1018T	p.R340C	SNP	exonic	SATB2		nonsynonymous SNV	SATB2:ENSCAFT00000017482.4:exon6:c.C1018T:p.R340C,SATB2:ENSCAFT00000062971.1:exon6:c.C841T:p.R281C,SATB2:ENSCAFT00000046713.3:exon9:c.C1195T:p.R399C	SRP159481	Mammary Tumor
SRR7780814-SRR7780815	chr38	23331252	23331252	T	C	CD1C	Missense_Mutation	ENSCAFT00000018160.4	exon1	c.A316G	p.I106V	SNP	exonic	CD1C		nonsynonymous SNV	CD1C:ENSCAFT00000018160.4:exon1:c.A316G:p.I106V,CD1C:ENSCAFT00000018162.3:exon1:c.A316G:p.I106V,CD1C:ENSCAFT00000018168.4:exon1:c.A316G:p.I106V,CD1C:ENSCAFT00000067933.1:exon1:c.A316G:p.I106V	SRP159481	Mammary Tumor
SRR7780814-SRR7780815	chr9	5591537	5591537	C	T	GRIN2C	Missense_Mutation	ENSCAFT00000007441.5	exon11	c.C2035T	p.R679C	SNP	exonic	GRIN2C		nonsynonymous SNV	GRIN2C:ENSCAFT00000007441.5:exon11:c.C2035T:p.R679C,GRIN2C:ENSCAFT00000044880.3:exon11:c.C2035T:p.R679C	SRP159481	Mammary Tumor
SRR7780830-SRR7780831	chr26	37886106	37886106	T	A	PTEN	Missense_Mutation	ENSCAFT00000024821.4	exon4	c.T274A	p.C92S	SNP	exonic	PTEN		nonsynonymous SNV	PTEN:ENSCAFT00000024821.4:exon4:c.T274A:p.C92S,PTEN:ENSCAFT00000087317.1:exon8:c.T370A:p.C124S	SRP159481	Mammary Tumor
SRR7780830-SRR7780831	chr27	5541379	5541379	T	A	KMT2D	Missense_Mutation	ENSCAFT00000045185.2	exon34	c.T10877A	p.I3626N	SNP	exonic	KMT2D		nonsynonymous SNV	KMT2D:ENSCAFT00000045185.2:exon34:c.T10877A:p.I3626N,KMT2D:ENSCAFT00000045560.3:exon34:c.T10553A:p.I3518N,KMT2D:ENSCAFT00000081492.1:exon34:c.T10877A:p.I3626N,KMT2D:ENSCAFT00000013872.6:exon35:c.T10664A:p.I3555N	SRP159481	Mammary Tumor
SRR7780830-SRR7780831	chr28	32674814	32674814	G	T	HMX3	Missense_Mutation	ENSCAFT00000020125.5	exon1	c.G602T	p.S201I	SNP	exonic	HMX3		nonsynonymous SNV	HMX3:ENSCAFT00000020125.5:exon1:c.G602T:p.S201I	SRP159481	Mammary Tumor
SRR7780830-SRR7780831	chr34	16916423	16916423	C	T	ABCC5	Missense_Mutation	ENSCAFT00000019223.4	exon2	c.G244A	p.G82S	SNP	exonic	ABCC5		nonsynonymous SNV	ABCC5:ENSCAFT00000019223.4:exon2:c.G244A:p.G82S,ABCC5:ENSCAFT00000071630.1:exon2:c.G97A:p.G33S,ABCC5:ENSCAFT00000075087.1:exon2:c.G172A:p.G58S,ABCC5:ENSCAFT00000080477.1:exon2:c.G172A:p.G58S,ABCC5:ENSCAFT00000082897.1:exon2:c.G244A:p.G82S,ABCC5:ENSCAFT00000093552.1:exon2:c.G172A:p.G58S	SRP159481	Mammary Tumor
SRR7780830-SRR7780831	chr37	25474664	25474664	G	A	WNT10A	Missense_Mutation	ENSCAFT00000023775.5	exon4	c.G1154A	p.R385H	SNP	exonic	WNT10A		nonsynonymous SNV	WNT10A:ENSCAFT00000023775.5:exon4:c.G1154A:p.R385H	SRP159481	Mammary Tumor
SRR7780830-SRR7780831	chr5	32563388	32563388	C	T	TP53	Missense_Mutation	ENSCAFT00000086831.1	exon5	c.G641A	p.R214Q	SNP	exonic	TP53		nonsynonymous SNV	TP53:ENSCAFT00000086831.1:exon5:c.G641A:p.R214Q,TP53:ENSCAFT00000026465.4:exon7:c.G710A:p.R237Q,TP53:ENSCAFT00000081814.1:exon7:c.G902A:p.R301Q	SRP159481	Mammary Tumor
SRR7780830-SRR7780831	chr6	22567952	22567952	C	T	SCNN1G	Missense_Mutation	ENSCAFT00000086826.1	exon11	c.G1736A	p.R579H	SNP	exonic	SCNN1G		nonsynonymous SNV	SCNN1G:ENSCAFT00000086826.1:exon11:c.G1736A:p.R579H,SCNN1G:ENSCAFT00000028061.3:exon13:c.G1700A:p.R567H	SRP159481	Mammary Tumor
SRR7780830-SRR7780831	chr7	73395225	73395225	C	A	LAMA1	Missense_Mutation	ENSCAFT00000029520.4	exon13	c.G1648T	p.V550L	SNP	exonic	LAMA1		nonsynonymous SNV	LAMA1:ENSCAFT00000029520.4:exon13:c.G1648T:p.V550L	SRP159481	Mammary Tumor
SRR7780834-SRR7780835	chr13	5199584	5199584	A	T	RIMS2	Missense_Mutation	ENSCAFT00000077730.1	exon3	c.A1151T	p.H384L	SNP	exonic	RIMS2		nonsynonymous SNV	RIMS2:ENSCAFT00000077730.1:exon3:c.A1151T:p.H384L	SRP159481	Mammary Tumor
SRR7780834-SRR7780835	chr16	55183413	55183413	C	T	CSMD1	Missense_Mutation	ENSCAFT00000013885.4	exon54	c.G8425A	p.A2809T	SNP	exonic	CSMD1		nonsynonymous SNV	CSMD1:ENSCAFT00000013885.4:exon54:c.G8425A:p.A2809T	SRP159481	Mammary Tumor
SRR7780834-SRR7780835	chr31	26074128	26074128	A	G	TIAM1	Missense_Mutation	ENSCAFT00000080421.1	exon8	c.T899C	p.L300P	SNP	exonic	TIAM1		nonsynonymous SNV	TIAM1:ENSCAFT00000080421.1:exon8:c.T899C:p.L300P,TIAM1:ENSCAFT00000075396.1:exon18:c.T3425C:p.L1142P,TIAM1:ENSCAFT00000014058.4:exon19:c.T3620C:p.L1207P,TIAM1:ENSCAFT00000014061.5:exon21:c.T3800C:p.L1267P,TIAM1:ENSCAFT00000065508.1:exon21:c.T3800C:p.L1267P,TIAM1:ENSCAFT00000083421.1:exon21:c.T3800C:p.L1267P	SRP159481	Mammary Tumor
SRR7780834-SRR7780835	chr32	26990160	26990160	T	C	TBCK	Missense_Mutation	ENSCAFT00000066313.1	exon6	c.A590G	p.K197R	SNP	exonic	TBCK		nonsynonymous SNV	TBCK:ENSCAFT00000066313.1:exon6:c.A590G:p.K197R,TBCK:ENSCAFT00000017509.3:exon8:c.A779G:p.K260R,TBCK:ENSCAFT00000067478.1:exon8:c.A779G:p.K260R,TBCK:ENSCAFT00000074359.1:exon8:c.A779G:p.K260R,TBCK:ENSCAFT00000079248.1:exon8:c.A779G:p.K260R,TBCK:ENSCAFT00000080432.1:exon8:c.A779G:p.K260R	SRP159481	Mammary Tumor
SRR7780834-SRR7780835	chr33	25789734	25789734	G	A	PARP14	Missense_Mutation	ENSCAFT00000019011.5	exon10	c.G3630A	p.M1210I	SNP	exonic	PARP14		nonsynonymous SNV	PARP14:ENSCAFT00000019011.5:exon10:c.G3630A:p.M1210I,PARP14:ENSCAFT00000043176.2:exon10:c.G3501A:p.M1167I,PARP14:ENSCAFT00000074037.1:exon10:c.G3630A:p.M1210I,PARP14:ENSCAFT00000077956.1:exon10:c.G3222A:p.M1074I	SRP159481	Mammary Tumor
SRR7780836-SRR7780837	chr1	107112573	107112573	C	A	DKKL1	Missense_Mutation	ENSCAFT00000005919.4	exon3	c.G223T	p.A75S	SNP	exonic	DKKL1		nonsynonymous SNV	DKKL1:ENSCAFT00000005919.4:exon3:c.G223T:p.A75S	SRP159481	Mammary Tumor
SRR7780836-SRR7780837	chr11	1401389	1401389	T	A	GFPT2	Missense_Mutation	ENSCAFT00000078334.1	exon8	c.T564A	p.N188K	SNP	exonic	GFPT2		nonsynonymous SNV	GFPT2:ENSCAFT00000078334.1:exon8:c.T564A:p.N188K,GFPT2:ENSCAFT00000093228.1:exon8:c.T882A:p.N294K,GFPT2:ENSCAFT00000000718.4:exon9:c.T699A:p.N233K	SRP159481	Mammary Tumor
SRR7780836-SRR7780837	chr12	10280539	10280539	C	T	FOXP4	Missense_Mutation	ENSCAFT00000068379.1	exon5	c.C578T	p.P193L	SNP	exonic	FOXP4		nonsynonymous SNV	FOXP4:ENSCAFT00000068379.1:exon5:c.C578T:p.P193L,FOXP4:ENSCAFT00000002501.4:exon6:c.C674T:p.P225L,FOXP4:ENSCAFT00000090672.1:exon6:c.C524T:p.P175L	SRP159481	Mammary Tumor
SRR7780836-SRR7780837	chr12	43776728	43776728	C	T	ME1	Missense_Mutation	ENSCAFT00000035246.2	exon3	c.G238A	p.V80M	SNP	exonic	ME1		nonsynonymous SNV	ME1:ENSCAFT00000035246.2:exon3:c.G238A:p.V80M,ME1:ENSCAFT00000044644.3:exon3:c.G196A:p.V66M	SRP159481	Mammary Tumor
SRR7780836-SRR7780837	chr14	3444623	3444623	G	A	EXOC4	Missense_Mutation	ENSCAFT00000002031.4	exon14	c.C2059T	p.L687F	SNP	exonic	EXOC4		nonsynonymous SNV	EXOC4:ENSCAFT00000002031.4:exon14:c.C2059T:p.L687F,EXOC4:ENSCAFT00000083371.1:exon14:c.C2059T:p.L687F	SRP159481	Mammary Tumor
SRR7780836-SRR7780837	chr16	8392201	8392201	G	A	DENND2A	Missense_Mutation	ENSCAFT00000050118.3	exon1	c.G29A	p.R10H	SNP	exonic	DENND2A		nonsynonymous SNV	DENND2A:ENSCAFT00000050118.3:exon1:c.G29A:p.R10H,DENND2A:ENSCAFT00000080791.1:exon1:c.G29A:p.R10H	SRP159481	Mammary Tumor
SRR7780836-SRR7780837	chr20	35312923	35312923	C	T	CACNA2D3	Missense_Mutation	ENSCAFT00000048013.3	exon12	c.G1105A	p.D369N	SNP	exonic	CACNA2D3		nonsynonymous SNV	CACNA2D3:ENSCAFT00000048013.3:exon12:c.G1105A:p.D369N,CACNA2D3:ENSCAFT00000084895.1:exon12:c.G1105A:p.D369N,CACNA2D3:ENSCAFT00000091672.1:exon13:c.G1123A:p.D375N,CACNA2D3:ENSCAFT00000013062.4:exon15:c.G1282A:p.D428N	SRP159481	Mammary Tumor
SRR7780836-SRR7780837	chr26	5483589	5483589	C	T	NCOR2	Missense_Mutation	ENSCAFT00000061352.1	exon27	c.C4691T	p.S1564L	SNP	exonic	NCOR2		nonsynonymous SNV	NCOR2:ENSCAFT00000061352.1:exon27:c.C4691T:p.S1564L,NCOR2:ENSCAFT00000081391.1:exon36:c.C5777T:p.S1926L,NCOR2:ENSCAFT00000093163.1:exon37:c.C5879T:p.S1960L,NCOR2:ENSCAFT00000011198.6:exon38:c.C5978T:p.S1993L,NCOR2:ENSCAFT00000048752.2:exon38:c.C5951T:p.S1984L	SRP159481	Mammary Tumor
SRR7780836-SRR7780837	chr26	37886103	37886103	C	G	PTEN	Missense_Mutation	ENSCAFT00000024821.4	exon4	c.C271G	p.H91D	SNP	exonic	PTEN		nonsynonymous SNV	PTEN:ENSCAFT00000024821.4:exon4:c.C271G:p.H91D,PTEN:ENSCAFT00000087317.1:exon8:c.C367G:p.H123D	SRP159481	Mammary Tumor
SRR7780836-SRR7780837	chr3	18250206	18250206	G	A	ADGRV1	Missense_Mutation	ENSCAFT00000013109.4	exon42	c.C9250T	p.L3084F	SNP	exonic	ADGRV1		nonsynonymous SNV	ADGRV1:ENSCAFT00000013109.4:exon42:c.C9250T:p.L3084F	SRP159481	Mammary Tumor
SRR7780836-SRR7780837	chr3	31301088	31301088	C	T	OR6C1	Missense_Mutation	ENSCAFT00000090237.1	exon1	c.C713T	p.T238I	SNP	exonic	OR6C1		nonsynonymous SNV	OR6C1:ENSCAFT00000090237.1:exon1:c.C713T:p.T238I	SRP159481	Mammary Tumor
SRR7780836-SRR7780837	chr34	12675674	12675674	A	G	PIK3CA	Missense_Mutation	ENSCAFT00000080543.1	exon20	c.A3140G	p.H1047R	SNP	exonic	PIK3CA		nonsynonymous SNV	PIK3CA:ENSCAFT00000080543.1:exon20:c.A3140G:p.H1047R	SRP159481	Mammary Tumor
SRR7780836-SRR7780837	chr37	25096549	25096549	G	A	USP37	Missense_Mutation	ENSCAFT00000023480.4	exon22	c.C2383T	p.H795Y	SNP	exonic	USP37		nonsynonymous SNV	USP37:ENSCAFT00000023480.4:exon22:c.C2383T:p.H795Y,USP37:ENSCAFT00000023494.5:exon23:c.C2665T:p.H889Y	SRP159481	Mammary Tumor
SRR7780836-SRR7780837	chr4	23843519	23843519	A	T	CFAP70	Missense_Mutation	ENSCAFT00000023341.4	exon8	c.T787A	p.Y263N	SNP	exonic	CFAP70		nonsynonymous SNV	CFAP70:ENSCAFT00000023341.4:exon8:c.T787A:p.Y263N,CFAP70:ENSCAFT00000043796.3:exon24:c.T3064A:p.Y1022N	SRP159481	Mammary Tumor
SRR7780836-SRR7780837	chr5	32563028	32563028	C	T	TP53	Missense_Mutation	ENSCAFT00000086831.1	exon6	c.G740A	p.R247H	SNP	exonic	TP53		nonsynonymous SNV	TP53:ENSCAFT00000086831.1:exon6:c.G740A:p.R247H,TP53:ENSCAFT00000026465.4:exon8:c.G809A:p.R270H,TP53:ENSCAFT00000081814.1:exon8:c.G1001A:p.R334H	SRP159481	Mammary Tumor
SRR7780836-SRR7780837	chr5	52478744	52478744	C	T	DAB1	Missense_Mutation	ENSCAFT00000079145.1	exon8	c.C737T	p.A246V	SNP	exonic	DAB1		nonsynonymous SNV	DAB1:ENSCAFT00000079145.1:exon8:c.C737T:p.A246V,DAB1:ENSCAFT00000079066.1:exon10:c.C836T:p.A279V,DAB1:ENSCAFT00000088662.1:exon10:c.C896T:p.A299V,DAB1:ENSCAFT00000030052.4:exon12:c.C941T:p.A314V,DAB1:ENSCAFT00000030059.5:exon12:c.C941T:p.A314V	SRP159481	Mammary Tumor
SRR7780836-SRR7780837	chr6	31787207	31787207	C	T	CIITA	Missense_Mutation	ENSCAFT00000061328.1	exon9	c.G2315A	p.R772Q	SNP	exonic	CIITA		nonsynonymous SNV	CIITA:ENSCAFT00000061328.1:exon9:c.G2315A:p.R772Q,CIITA:ENSCAFT00000073438.1:exon9:c.G2225A:p.R742Q,CIITA:ENSCAFT00000093593.1:exon9:c.G2315A:p.R772Q,CIITA:ENSCAFT00000070742.1:exon10:c.G2252A:p.R751Q,CIITA:ENSCAFT00000090893.1:exon10:c.G2270A:p.R757Q,CIITA:ENSCAFT00000030069.4:exon11:c.G2081A:p.R694Q,CIITA:ENSCAFT00000030075.5:exon11:c.G2099A:p.R700Q,CIITA:ENSCAFT00000073013.1:exon11:c.G2009A:p.…	SRP159481	Mammary Tumor
SRR7780836-SRR7780837	chr9	4406796	4406796	C	T	QRICH2	Missense_Mutation	ENSCAFT00000008146.4	exon10	c.C1432T	p.R478W	SNP	exonic	QRICH2		nonsynonymous SNV	QRICH2:ENSCAFT00000008146.4:exon10:c.C1432T:p.R478W,QRICH2:ENSCAFT00000047537.3:exon21:c.C6229T:p.R2077W	SRP159481	Mammary Tumor
SRR7780843-SRR7781004	chr1	30587996	30587996	G	A	ARFGEF3	Missense_Mutation	ENSCAFT00000000423.4	exon8	c.G1510A	p.A504T	SNP	exonic	ARFGEF3		nonsynonymous SNV	ARFGEF3:ENSCAFT00000000423.4:exon8:c.G1510A:p.A504T,ARFGEF3:ENSCAFT00000083086.1:exon8:c.G1591A:p.A531T,ARFGEF3:ENSCAFT00000066773.1:exon9:c.G1633A:p.A545T,ARFGEF3:ENSCAFT00000086635.1:exon9:c.G1642A:p.A548T,ARFGEF3:ENSCAFT00000044681.3:exon10:c.G1765A:p.A589T	SRP159481	Mammary Tumor
SRR7780843-SRR7781004	chr17	11279165	11279165	G	A	NBAS	Missense_Mutation	ENSCAFT00000063175.1	exon23	c.C2518T	p.R840W	SNP	exonic	NBAS		nonsynonymous SNV	NBAS:ENSCAFT00000063175.1:exon23:c.C2518T:p.R840W,NBAS:ENSCAFT00000089769.1:exon23:c.C2488T:p.R830W,NBAS:ENSCAFT00000005890.4:exon24:c.C2617T:p.R873W,NBAS:ENSCAFT00000005893.5:exon24:c.C2713T:p.R905W,NBAS:ENSCAFT00000075619.1:exon24:c.C2617T:p.R873W,NBAS:ENSCAFT00000076308.1:exon24:c.C2617T:p.R873W,NBAS:ENSCAFT00000083753.1:exon24:c.C2713T:p.R905W	SRP159481	Mammary Tumor
SRR7780843-SRR7781004	chr18	46073160	46073160	G	T	SYT8	Missense_Mutation	ENSCAFT00000015995.4	exon4	c.G144T	p.W48C	SNP	exonic	SYT8		nonsynonymous SNV	SYT8:ENSCAFT00000015995.4:exon4:c.G144T:p.W48C	SRP159481	Mammary Tumor
SRR7780843-SRR7781004	chr20	49133733	49133733	G	C	NFIX	Missense_Mutation	ENSCAFT00000087685.1	exon6	c.C1022G	p.P341R	SNP	exonic	NFIX		nonsynonymous SNV	NFIX:ENSCAFT00000087685.1:exon6:c.C1022G:p.P341R,NFIX:ENSCAFT00000026964.3:exon7:c.C1001G:p.P334R,NFIX:ENSCAFT00000026970.5:exon7:c.C1148G:p.P383R	SRP159481	Mammary Tumor
SRR7780843-SRR7781004	chr26	23699104	23699104	C	T	TCN2	Missense_Mutation	ENSCAFT00000020341.4	exon3	c.C98T	p.T33I	SNP	exonic	TCN2		nonsynonymous SNV	TCN2:ENSCAFT00000020341.4:exon3:c.C98T:p.T33I,TCN2:ENSCAFT00000061678.1:exon3:c.C98T:p.T33I	SRP159481	Mammary Tumor
SRR7780843-SRR7781004	chr26	30687717	30687717	T	C	SERPIND1	Missense_Mutation	ENSCAFT00000024253.2	exon3	c.A1333G	p.K445E	SNP	exonic	SERPIND1		nonsynonymous SNV	SERPIND1:ENSCAFT00000024253.2:exon3:c.A1333G:p.K445E	SRP159481	Mammary Tumor
SRR7780843-SRR7781004	chr29	23796486	23796486	C	T	HNF4G	Missense_Mutation	ENSCAFT00000013166.4	exon10	c.C1090T	p.R364W	SNP	exonic	HNF4G		nonsynonymous SNV	HNF4G:ENSCAFT00000013166.4:exon10:c.C1090T:p.R364W	SRP159481	Mammary Tumor
SRR7780843-SRR7781004	chr33	28744002	28744002	C	A	RPL35A	Missense_Mutation	ENSCAFT00000020171.4	exon3	c.G50T	p.G17V	SNP	exonic	RPL35A		nonsynonymous SNV	RPL35A:ENSCAFT00000020171.4:exon3:c.G50T:p.G17V	SRP159481	Mammary Tumor
SRR7780843-SRR7781004	chr5	14761858	14761858	A	G	DPAGT1	Missense_Mutation	ENSCAFT00000019543.5	exon3	c.A419G	p.Y140C	SNP	exonic	DPAGT1		nonsynonymous SNV	DPAGT1:ENSCAFT00000019543.5:exon3:c.A419G:p.Y140C,DPAGT1:ENSCAFT00000044382.2:exon3:c.A419G:p.Y140C	SRP159481	Mammary Tumor
SRR7780847-SRR7780846	chr1	55510403	55510403	T	C	AFDN	Missense_Mutation	ENSCAFT00000047722.3	exon23	c.T3035C	p.V1012A	SNP	exonic	AFDN		nonsynonymous SNV	AFDN:ENSCAFT00000047722.3:exon23:c.T3035C:p.V1012A,AFDN:ENSCAFT00000068310.1:exon23:c.T3059C:p.V1020A,AFDN:ENSCAFT00000069119.1:exon23:c.T3059C:p.V1020A,AFDN:ENSCAFT00000001341.5:exon24:c.T3080C:p.V1027A,AFDN:ENSCAFT00000066236.1:exon24:c.T3080C:p.V1027A,AFDN:ENSCAFT00000079765.1:exon24:c.T3080C:p.V1027A	SRP159481	Mammary Tumor
SRR7780847-SRR7780846	chr11	21361657	21361657	G	T	HSPA4	Missense_Mutation	ENSCAFT00000001485.4	exon18	c.G2307T	p.Q769H	SNP	exonic	HSPA4		nonsynonymous SNV	HSPA4:ENSCAFT00000001485.4:exon18:c.G2307T:p.Q769H,HSPA4:ENSCAFT00000083021.1:exon18:c.G2298T:p.Q766H	SRP159481	Mammary Tumor
SRR7780847-SRR7780846	chr17	795208	795208	G	A	TPO	Missense_Mutation	ENSCAFT00000005172.4	exon7	c.G1079A	p.R360H	SNP	exonic	TPO		nonsynonymous SNV	TPO:ENSCAFT00000005172.4:exon7:c.G1079A:p.R360H	SRP159481	Mammary Tumor
SRR7780847-SRR7780846	chr22	30768340	30768340	G	A	MYCBP2	Missense_Mutation	ENSCAFT00000065179.1	exon20	c.C3035T	p.A1012V	SNP	exonic	MYCBP2		nonsynonymous SNV	MYCBP2:ENSCAFT00000065179.1:exon20:c.C3035T:p.A1012V,MYCBP2:ENSCAFT00000077346.1:exon21:c.C3080T:p.A1027V,MYCBP2:ENSCAFT00000084227.1:exon21:c.C3137T:p.A1046V,MYCBP2:ENSCAFT00000093725.1:exon21:c.C3143T:p.A1048V,MYCBP2:ENSCAFT00000008311.4:exon22:c.C3245T:p.A1082V,MYCBP2:ENSCAFT00000044597.3:exon22:c.C3245T:p.A1082V,MYCBP2:ENSCAFT00000067781.1:exon22:c.C3245T:p.A1082V,MYCBP2:ENSCAFT00000073319.1:…	SRP159481	Mammary Tumor
SRR7780847-SRR7780846	chr31	31501321	31501321	C	T	DOP1B	Missense_Mutation	ENSCAFT00000073315.1	exon16	c.C2975T	p.A992V	SNP	exonic	DOP1B		nonsynonymous SNV	DOP1B:ENSCAFT00000073315.1:exon16:c.C2975T:p.A992V,DOP1B:ENSCAFT00000015337.4:exon18:c.C3320T:p.A1107V,DOP1B:ENSCAFT00000081673.1:exon18:c.C3338T:p.A1113V,DOP1B:ENSCAFT00000042837.3:exon19:c.C3437T:p.A1146V,DOP1B:ENSCAFT00000066111.1:exon19:c.C3437T:p.A1146V,DOP1B:ENSCAFT00000073789.1:exon19:c.C3437T:p.A1146V	SRP159481	Mammary Tumor
SRR7780849-SRR7780848	chr16	11228109	11228109	G	T	DGKI	Missense_Mutation	ENSCAFT00000044633.2	exon26	c.G1759T	p.A587S	SNP	exonic	DGKI		nonsynonymous SNV	DGKI:ENSCAFT00000044633.2:exon26:c.G1759T:p.A587S,DGKI:ENSCAFT00000005413.5:exon30:c.G2554T:p.A852S,DGKI:ENSCAFT00000078634.1:exon36:c.G3424T:p.A1142S,DGKI:ENSCAFT00000090929.1:exon37:c.G3487T:p.A1163S	SRP159481	Mammary Tumor
SRR7780849-SRR7780848	chr18	12432010	12432010	G	C	NRCAM	Missense_Mutation	ENSCAFT00000049502.2	exon13	c.G1348C	p.D450H	SNP	exonic	NRCAM		nonsynonymous SNV	NRCAM:ENSCAFT00000049502.2:exon13:c.G1348C:p.D450H,NRCAM:ENSCAFT00000072770.1:exon13:c.G1387C:p.D463H,NRCAM:ENSCAFT00000006033.5:exon14:c.G1405C:p.D469H,NRCAM:ENSCAFT00000048038.3:exon14:c.G1405C:p.D469H,NRCAM:ENSCAFT00000068132.1:exon14:c.G1405C:p.D469H,NRCAM:ENSCAFT00000092053.1:exon14:c.G1405C:p.D469H	SRP159481	Mammary Tumor
SRR7780849-SRR7780848	chr19	53562169	53562169	C	T	FMNL2	Missense_Mutation	ENSCAFT00000009376.6	exon5	c.C371T	p.T124I	SNP	exonic	FMNL2		nonsynonymous SNV	FMNL2:ENSCAFT00000009376.6:exon5:c.C371T:p.T124I,FMNL2:ENSCAFT00000043228.3:exon5:c.C371T:p.T124I,FMNL2:ENSCAFT00000061524.1:exon5:c.C371T:p.T124I,FMNL2:ENSCAFT00000064671.1:exon5:c.C371T:p.T124I	SRP159481	Mammary Tumor
SRR7780849-SRR7780848	chr25	18573743	18573743	C	G	CENPJ	Missense_Mutation	ENSCAFT00000062814.1	exon6	c.C1173G	p.I391M	SNP	exonic	CENPJ		nonsynonymous SNV	CENPJ:ENSCAFT00000062814.1:exon6:c.C1173G:p.I391M,CENPJ:ENSCAFT00000011844.4:exon7:c.C1473G:p.I491M,CENPJ:ENSCAFT00000060267.1:exon7:c.C1473G:p.I491M,CENPJ:ENSCAFT00000075824.1:exon7:c.C1473G:p.I491M,CENPJ:ENSCAFT00000076673.1:exon7:c.C1473G:p.I491M	SRP159481	Mammary Tumor
SRR7780849-SRR7780848	chr29	16344917	16344917	C	G	SGK3	Missense_Mutation	ENSCAFT00000011773.4	exon2	c.C41G	p.P14R	SNP	exonic	SGK3		nonsynonymous SNV	SGK3:ENSCAFT00000011773.4:exon2:c.C41G:p.P14R,SGK3:ENSCAFT00000064223.1:exon2:c.C41G:p.P14R,SGK3:ENSCAFT00000072836.1:exon2:c.C23G:p.P8R	SRP159481	Mammary Tumor
SRR7780849-SRR7780848	chr5	82709119	82709119	C	A	CMTM1	Missense_Mutation	ENSCAFT00000048177.1	exon1	c.G215T	p.R72L	SNP	exonic	CMTM1		nonsynonymous SNV	CMTM1:ENSCAFT00000048177.1:exon1:c.G215T:p.R72L	SRP159481	Mammary Tumor
SRR7780851-SRR7780850	chr10	35430968	35430968	T	A	GCC2	Missense_Mutation	ENSCAFT00000003208.4	exon2	c.A176T	p.D59V	SNP	exonic	GCC2		nonsynonymous SNV	GCC2:ENSCAFT00000003208.4:exon2:c.A176T:p.D59V,GCC2:ENSCAFT00000062214.1:exon2:c.A176T:p.D59V,GCC2:ENSCAFT00000067193.1:exon2:c.A176T:p.D59V,GCC2:ENSCAFT00000078150.1:exon2:c.A176T:p.D59V,GCC2:ENSCAFT00000092765.1:exon2:c.A176T:p.D59V	SRP159481	Mammary Tumor
SRR7780851-SRR7780850	chr10	61550653	61550653	C	A	XPO1	Missense_Mutation	ENSCAFT00000004940.4	exon16	c.G1920T	p.M640I	SNP	exonic	XPO1		nonsynonymous SNV	XPO1:ENSCAFT00000004940.4:exon16:c.G1920T:p.M640I	SRP159481	Mammary Tumor
SRR7780851-SRR7780850	chr12	21721759	21721759	C	A	MLIP	Missense_Mutation	ENSCAFT00000081177.1	exon11	c.C2755A	p.L919M	SNP	exonic	MLIP		nonsynonymous SNV	MLIP:ENSCAFT00000081177.1:exon11:c.C2755A:p.L919M,MLIP:ENSCAFT00000060619.1:exon12:c.C2767A:p.L923M,MLIP:ENSCAFT00000003626.5:exon13:c.C2842A:p.L948M,MLIP:ENSCAFT00000080208.1:exon13:c.C2710A:p.L904M,MLIP:ENSCAFT00000090852.1:exon13:c.C2815A:p.L939M,MLIP:ENSCAFT00000003629.4:exon14:c.C2887A:p.L963M,MLIP:ENSCAFT00000075556.1:exon14:c.C2794A:p.L932M	SRP159481	Mammary Tumor
SRR7780851-SRR7780850	chr12	26853709	26853709	C	A	LGSN	Missense_Mutation	ENSCAFT00000048289.3	exon4	c.G1028T	p.W343L	SNP	exonic	LGSN		nonsynonymous SNV	LGSN:ENSCAFT00000048289.3:exon4:c.G1028T:p.W343L,LGSN:ENSCAFT00000003918.4:exon5:c.G1205T:p.W402L,LGSN:ENSCAFT00000050059.3:exon5:c.G1226T:p.W409L,LGSN:ENSCAFT00000072481.1:exon5:c.G607T:p.G203C,LGSN:ENSCAFT00000076048.1:exon5:c.G1364T:p.W455L	SRP159481	Mammary Tumor
SRR7780851-SRR7780850	chr13	5169181	5169181	A	C	RIMS2	Missense_Mutation	ENSCAFT00000077730.1	exon2	c.A853C	p.M285L	SNP	exonic	RIMS2		nonsynonymous SNV	RIMS2:ENSCAFT00000077730.1:exon2:c.A853C:p.M285L,RIMS2:ENSCAFT00000001036.4:exon3:c.A763C:p.M255L,RIMS2:ENSCAFT00000047827.3:exon4:c.A1429C:p.M477L,RIMS2:ENSCAFT00000062317.1:exon4:c.A1429C:p.M477L,RIMS2:ENSCAFT00000070022.1:exon4:c.A1039C:p.M347L,RIMS2:ENSCAFT00000078561.1:exon4:c.A1429C:p.M477L,RIMS2:ENSCAFT00000082731.1:exon4:c.A1429C:p.M477L	SRP159481	Mammary Tumor
SRR7780851-SRR7780850	chr15	43824638	43824638	G	A	OTUD4	Missense_Mutation	ENSCAFT00000012205.4	exon19	c.C1894T	p.H632Y	SNP	exonic	OTUD4		nonsynonymous SNV	OTUD4:ENSCAFT00000012205.4:exon19:c.C1894T:p.H632Y,OTUD4:ENSCAFT00000076396.1:exon19:c.C1894T:p.H632Y,OTUD4:ENSCAFT00000077717.1:exon20:c.C1957T:p.H653Y	SRP159481	Mammary Tumor
SRR7780851-SRR7780850	chr18	51829463	51829463	C	T	TIGD3	Missense_Mutation	ENSCAFT00000021608.1	exon1	c.G203A	p.R68H	SNP	exonic	TIGD3		nonsynonymous SNV	TIGD3:ENSCAFT00000021608.1:exon1:c.G203A:p.R68H	SRP159481	Mammary Tumor
SRR7780851-SRR7780850	chr25	33131769	33131769	T	A	ADAM28	Missense_Mutation	ENSCAFT00000086567.1	exon5	c.A569T	p.K190M	SNP	exonic	ADAM28		nonsynonymous SNV	ADAM28:ENSCAFT00000086567.1:exon5:c.A569T:p.K190M,ADAM28:ENSCAFT00000014470.4:exon7:c.A725T:p.K242M,ADAM28:ENSCAFT00000078276.1:exon7:c.A578T:p.K193M	SRP159481	Mammary Tumor
SRR7780851-SRR7780850	chr25	39746901	39746901	G	A	RHBDD1	Missense_Mutation	ENSCAFT00000016536.4	exon3	c.G302A	p.S101N	SNP	exonic	RHBDD1		nonsynonymous SNV	RHBDD1:ENSCAFT00000016536.4:exon3:c.G302A:p.S101N,RHBDD1:ENSCAFT00000039581.4:exon3:c.G302A:p.S101N,RHBDD1:ENSCAFT00000061932.1:exon3:c.G302A:p.S101N	SRP159481	Mammary Tumor
SRR7780851-SRR7780850	chr26	19772779	19772779	C	T	MYO18B	Missense_Mutation	ENSCAFT00000062006.1	exon41	c.C6965T	p.S2322L	SNP	exonic	MYO18B		nonsynonymous SNV	MYO18B:ENSCAFT00000062006.1:exon41:c.C6965T:p.S2322L,MYO18B:ENSCAFT00000070650.1:exon41:c.C7025T:p.S2342L,MYO18B:ENSCAFT00000081663.1:exon41:c.C7010T:p.S2337L,MYO18B:ENSCAFT00000018507.4:exon42:c.C7139T:p.S2380L	SRP159481	Mammary Tumor
SRR7780851-SRR7780850	chr27	22261798	22261798	G	A	KRAS	Missense_Mutation	ENSCAFT00000010525.4	exon2	c.G317A	p.G106D	SNP	exonic	KRAS		nonsynonymous SNV	KRAS:ENSCAFT00000010525.4:exon2:c.G317A:p.G106D,KRAS:ENSCAFT00000093055.1:exon2:c.G317A:p.G106D	SRP159481	Mammary Tumor
SRR7780851-SRR7780850	chr34	12675679	12675679	G	C	PIK3CA	Missense_Mutation	ENSCAFT00000080543.1	exon20	c.G3145C	p.G1049R	SNP	exonic	PIK3CA		nonsynonymous SNV	PIK3CA:ENSCAFT00000080543.1:exon20:c.G3145C:p.G1049R	SRP159481	Mammary Tumor
SRR7780851-SRR7780850	chr4	75077424	75077424	T	G	ZFR	Missense_Mutation	ENSCAFT00000029995.5	exon9	c.T1645G	p.C549G	SNP	exonic	ZFR		nonsynonymous SNV	ZFR:ENSCAFT00000029995.5:exon9:c.T1645G:p.C549G,ZFR:ENSCAFT00000049882.3:exon9:c.T1639G:p.C547G,ZFR:ENSCAFT00000073936.1:exon9:c.T1645G:p.C549G,ZFR:ENSCAFT00000090910.1:exon9:c.T1483G:p.C495G,ZFR:ENSCAFT00000068647.1:exon11:c.T1756G:p.C586G	SRP159481	Mammary Tumor
SRR7780851-SRR7780850	chr5	56487667	56487667	C	G	INTS11	Missense_Mutation	ENSCAFT00000072566.1	exon8	c.G702C	p.Q234H	SNP	exonic	INTS11		nonsynonymous SNV	INTS11:ENSCAFT00000072566.1:exon8:c.G702C:p.Q234H,INTS11:ENSCAFT00000030626.4:exon10:c.G1005C:p.Q335H	SRP159481	Mammary Tumor
SRR7780851-SRR7780850	chr7	43322518	43322518	G	A	SLC27A3	Missense_Mutation	ENSCAFT00000027642.5	exon8	c.C1316T	p.A439V	SNP	exonic	SLC27A3		nonsynonymous SNV	SLC27A3:ENSCAFT00000027642.5:exon8:c.C1316T:p.A439V	SRP159481	Mammary Tumor
SRR7780853-SRR7780852	chr1	91268199	91268199	A	C	VLDLR	Missense_Mutation	ENSCAFT00000064967.1	exon15	c.A2170C	p.N724H	SNP	exonic	VLDLR		nonsynonymous SNV	VLDLR:ENSCAFT00000064967.1:exon15:c.A2170C:p.N724H,VLDLR:ENSCAFT00000037573.4:exon16:c.A2293C:p.N765H,VLDLR:ENSCAFT00000037581.3:exon16:c.A2293C:p.N765H	SRP159481	Mammary Tumor
SRR7780853-SRR7780852	chr25	479398	479398	G	C	SLC25A15	Missense_Mutation	ENSCAFT00000009612.2	exon3	c.C396G	p.C132W	SNP	exonic	SLC25A15		nonsynonymous SNV	SLC25A15:ENSCAFT00000009612.2:exon3:c.C396G:p.C132W	SRP159481	Mammary Tumor
SRR7780853-SRR7780852	chr26	16868941	16868941	T	C	OASL	Missense_Mutation	ENSCAFT00000016750.2	exon1	c.A113G	p.Q38R	SNP	exonic	OASL		nonsynonymous SNV	OASL:ENSCAFT00000016750.2:exon1:c.A113G:p.Q38R	SRP159481	Mammary Tumor
SRR7780853-SRR7780852	chr27	22261798	22261798	G	A	KRAS	Missense_Mutation	ENSCAFT00000010525.4	exon2	c.G317A	p.G106D	SNP	exonic	KRAS		nonsynonymous SNV	KRAS:ENSCAFT00000010525.4:exon2:c.G317A:p.G106D,KRAS:ENSCAFT00000093055.1:exon2:c.G317A:p.G106D	SRP159481	Mammary Tumor
SRR7780853-SRR7780852	chr5	62377465	62377465	C	T	CA6	Missense_Mutation	ENSCAFT00000091102.1	exon6	c.C748T	p.P250S	SNP	exonic	CA6		nonsynonymous SNV	CA6:ENSCAFT00000091102.1:exon6:c.C748T:p.P250S,CA6:ENSCAFT00000031340.4:exon7:c.C802T:p.P268S,CA6:ENSCAFT00000066961.1:exon7:c.C802T:p.P268S	SRP159481	Mammary Tumor
SRR7780853-SRR7780852	chr6	41407952	41407952	C	A	KCNA2	Missense_Mutation	ENSCAFT00000031442.4	exon1	c.C872A	p.A291D	SNP	exonic	KCNA2		nonsynonymous SNV	KCNA2:ENSCAFT00000031442.4:exon1:c.C872A:p.A291D	SRP159481	Mammary Tumor
SRR7780853-SRR7780852	chr7	411143	411143	C	T	KDM5B	Missense_Mutation	ENSCAFT00000016655.4	exon25	c.C4087T	p.R1363W	SNP	exonic	KDM5B		nonsynonymous SNV	KDM5B:ENSCAFT00000016655.4:exon25:c.C4087T:p.R1363W,KDM5B:ENSCAFT00000084252.1:exon26:c.C4330T:p.R1444W	SRP159481	Mammary Tumor
SRR7780856-SRR7780857	chr1	114616263	114616263	G	A	GGN	Missense_Mutation	ENSCAFT00000037250.3	exon2	c.G428A	p.R143Q	SNP	exonic	GGN		nonsynonymous SNV	GGN:ENSCAFT00000037250.3:exon2:c.G428A:p.R143Q,GGN:ENSCAFT00000043150.2:exon2:c.G428A:p.R143Q	SRP159481	Mammary Tumor
SRR7780856-SRR7780857	chr10	26542249	26542249	C	T	PLA2G6	Missense_Mutation	ENSCAFT00000080869.1	exon6	c.C947T	p.A316V	SNP	exonic	PLA2G6		nonsynonymous SNV	PLA2G6:ENSCAFT00000080869.1:exon6:c.C947T:p.A316V,PLA2G6:ENSCAFT00000002215.5:exon8:c.C1229T:p.A410V,PLA2G6:ENSCAFT00000081169.1:exon8:c.C1319T:p.A440V,PLA2G6:ENSCAFT00000002213.4:exon9:c.C1481T:p.A494V,PLA2G6:ENSCAFT00000087199.1:exon9:c.C1391T:p.A464V	SRP159481	Mammary Tumor
SRR7780856-SRR7780857	chr14	9576832	9576832	A	G	GRM8	Missense_Mutation	ENSCAFT00000002730.5	exon6	c.A1318G	p.K440E	SNP	exonic	GRM8		nonsynonymous SNV	GRM8:ENSCAFT00000002730.5:exon6:c.A1318G:p.K440E,GRM8:ENSCAFT00000063399.1:exon8:c.A1456G:p.K486E	SRP159481	Mammary Tumor
SRR7780856-SRR7780857	chr16	44225113	44225113	G	A	FAT1	Missense_Mutation	ENSCAFT00000088178.1	exon17	c.G10324A	p.A3442T	SNP	exonic	FAT1		nonsynonymous SNV	FAT1:ENSCAFT00000088178.1:exon17:c.G10324A:p.A3442T,FAT1:ENSCAFT00000061740.1:exon18:c.G10639A:p.A3547T,FAT1:ENSCAFT00000078074.1:exon18:c.G10639A:p.A3547T,FAT1:ENSCAFT00000011726.4:exon19:c.G10708A:p.A3570T,FAT1:ENSCAFT00000083137.1:exon19:c.G10708A:p.A3570T,FAT1:ENSCAFT00000089623.1:exon19:c.G10708A:p.A3570T	SRP159481	Mammary Tumor
SRR7780856-SRR7780857	chr20	43472506	43472506	T	G	KIF15	Missense_Mutation	ENSCAFT00000022418.4	exon14	c.A1698C	p.E566D	SNP	exonic	KIF15		nonsynonymous SNV	KIF15:ENSCAFT00000022418.4:exon14:c.A1698C:p.E566D,KIF15:ENSCAFT00000022406.5:exon23:c.A2793C:p.E931D	SRP159481	Mammary Tumor
SRR7780856-SRR7780857	chr20	57790116	57790116	C	T	ELANE	Missense_Mutation	ENSCAFT00000031271.4	exon3	c.G331A	p.D111N	SNP	exonic	ELANE		nonsynonymous SNV	ELANE:ENSCAFT00000031271.4:exon3:c.G331A:p.D111N,ELANE:ENSCAFT00000076108.1:exon3:c.G331A:p.D111N	SRP159481	Mammary Tumor
SRR7780856-SRR7780857	chr22	26981379	26981379	G	A	PIBF1	Missense_Mutation	ENSCAFT00000008090.4	exon6	c.G829A	p.E277K	SNP	exonic	PIBF1		nonsynonymous SNV	PIBF1:ENSCAFT00000008090.4:exon6:c.G829A:p.E277K,PIBF1:ENSCAFT00000065954.1:exon6:c.G829A:p.E277K,PIBF1:ENSCAFT00000066442.1:exon6:c.G829A:p.E277K,PIBF1:ENSCAFT00000077204.1:exon6:c.G829A:p.E277K,PIBF1:ENSCAFT00000085228.1:exon6:c.G829A:p.E277K	SRP159481	Mammary Tumor
SRR7780856-SRR7780857	chr24	46385708	46385708	C	T	RBBP8NL	Missense_Mutation	ENSCAFT00000020136.4	exon1	c.G325A	p.A109T	SNP	exonic	RBBP8NL		nonsynonymous SNV	RBBP8NL:ENSCAFT00000020136.4:exon1:c.G325A:p.A109T,RBBP8NL:ENSCAFT00000067173.1:exon1:c.G325A:p.A109T,RBBP8NL:ENSCAFT00000070104.1:exon1:c.G325A:p.A109T,RBBP8NL:ENSCAFT00000060194.1:exon3:c.G166A:p.A56T	SRP159481	Mammary Tumor
SRR7780856-SRR7780857	chr27	22261798	22261798	G	T	KRAS	Missense_Mutation	ENSCAFT00000010525.4	exon2	c.G317T	p.G106V	SNP	exonic	KRAS		nonsynonymous SNV	KRAS:ENSCAFT00000010525.4:exon2:c.G317T:p.G106V,KRAS:ENSCAFT00000093055.1:exon2:c.G317T:p.G106V	SRP159481	Mammary Tumor
SRR7780856-SRR7780857	chr30	7549736	7549736	G	C	DISP2	Missense_Mutation	ENSCAFT00000014457.4	exon8	c.G1963C	p.A655P	SNP	exonic	DISP2		nonsynonymous SNV	DISP2:ENSCAFT00000014457.4:exon8:c.G1963C:p.A655P	SRP159481	Mammary Tumor
SRR7780856-SRR7780857	chr32	30564917	30564917	C	A	ENPEP	Missense_Mutation	ENSCAFT00000018417.4	exon2	c.C728A	p.S243Y	SNP	exonic	ENPEP		nonsynonymous SNV	ENPEP:ENSCAFT00000018417.4:exon2:c.C728A:p.S243Y	SRP159481	Mammary Tumor
SRR7780856-SRR7780857	chr34	12675674	12675674	A	T	PIK3CA	Missense_Mutation	ENSCAFT00000080543.1	exon20	c.A3140T	p.H1047L	SNP	exonic	PIK3CA		nonsynonymous SNV	PIK3CA:ENSCAFT00000080543.1:exon20:c.A3140T:p.H1047L	SRP159481	Mammary Tumor
SRR7780856-SRR7780857	chr36	12215155	12215155	A	G	XIRP2	Missense_Mutation	ENSCAFT00000018545.6	exon7	c.A709G	p.I237V	SNP	exonic	XIRP2		nonsynonymous SNV	XIRP2:ENSCAFT00000018545.6:exon7:c.A709G:p.I237V	SRP159481	Mammary Tumor
SRR7780856-SRR7780857	chr38	22103549	22103549	G	A	KCNJ9	Missense_Mutation	ENSCAFT00000047817.2	exon1	c.C569T	p.P190L	SNP	exonic	KCNJ9		nonsynonymous SNV	KCNJ9:ENSCAFT00000047817.2:exon1:c.C569T:p.P190L	SRP159481	Mammary Tumor
SRR7780856-SRR7780857	chr6	39933450	39933450	C	T	METTL26	Missense_Mutation	ENSCAFT00000062382.1	exon3	c.C287T	p.P96L	SNP	exonic	METTL26		nonsynonymous SNV	METTL26:ENSCAFT00000062382.1:exon3:c.C287T:p.P96L,METTL26:ENSCAFT00000070031.1:exon4:c.C914T:p.P305L,METTL26:ENSCAFT00000062950.1:exon5:c.C680T:p.P227L,METTL26:ENSCAFT00000077265.1:exon5:c.C518T:p.P173L,METTL26:ENSCAFT00000031253.4:exon6:c.C578T:p.P193L	SRP159481	Mammary Tumor
SRR7780856-SRR7780857	chr6	50053261	50053261	T	C	AGL	Missense_Mutation	ENSCAFT00000078100.1	exon27	c.A3712G	p.R1238G	SNP	exonic	AGL		nonsynonymous SNV	AGL:ENSCAFT00000078100.1:exon27:c.A3712G:p.R1238G,AGL:ENSCAFT00000047455.3:exon28:c.A3835G:p.R1279G,AGL:ENSCAFT00000063103.1:exon28:c.A3709G:p.R1237G,AGL:ENSCAFT00000031896.3:exon29:c.A3913G:p.R1305G,AGL:ENSCAFT00000085859.1:exon29:c.A3913G:p.R1305G	SRP159481	Mammary Tumor
SRR7780859-SRR7780858	chr13	37451283	37451283	C	T	PLEC	Missense_Mutation	ENSCAFT00000080857.1	exon21	c.G11669A	p.G3890D	SNP	exonic	PLEC		nonsynonymous SNV	PLEC:ENSCAFT00000080857.1:exon21:c.G11669A:p.G3890D,PLEC:ENSCAFT00000075183.1:exon31:c.G12983A:p.G4328D,PLEC:ENSCAFT00000060448.1:exon32:c.G12767A:p.G4256D,PLEC:ENSCAFT00000082428.1:exon32:c.G12770A:p.G4257D,PLEC:ENSCAFT00000047267.3:exon33:c.G11681A:p.G3894D,PLEC:ENSCAFT00000069777.1:exon33:c.G13298A:p.G4433D,PLEC:ENSCAFT00000070231.1:exon33:c.G13196A:p.G4399D,PLEC:ENSCAFT00000083528.1:exon33:c.…	SRP159481	Mammary Tumor
SRR7780859-SRR7780858	chr15	48868236	48868236	A	G	LRBA	Missense_Mutation	ENSCAFT00000074323.1	exon10	c.T1447C	p.W483R	SNP	exonic	LRBA		nonsynonymous SNV	LRBA:ENSCAFT00000074323.1:exon10:c.T1447C:p.W483R,LRBA:ENSCAFT00000067675.1:exon11:c.T1543C:p.W515R,LRBA:ENSCAFT00000064975.1:exon12:c.T1780C:p.W594R,LRBA:ENSCAFT00000012691.4:exon13:c.T1876C:p.W626R,LRBA:ENSCAFT00000049732.3:exon13:c.T1876C:p.W626R,LRBA:ENSCAFT00000069670.1:exon13:c.T1876C:p.W626R,LRBA:ENSCAFT00000080713.1:exon13:c.T1876C:p.W626R	SRP159481	Mammary Tumor
SRR7780859-SRR7780858	chr18	45536982	45536982	T	C	MUC5B	Missense_Mutation	ENSCAFT00000015796.4	exon30	c.T8465C	p.I2822T	SNP	exonic	MUC5B		nonsynonymous SNV	MUC5B:ENSCAFT00000015796.4:exon30:c.T8465C:p.I2822T	SRP159481	Mammary Tumor
SRR7780859-SRR7780858	chr2	21113255	21113255	G	A	ITGA8	Missense_Mutation	ENSCAFT00000007509.4	exon7	c.G493A	p.D165N	SNP	exonic	ITGA8		nonsynonymous SNV	ITGA8:ENSCAFT00000007509.4:exon7:c.G493A:p.D165N	SRP159481	Mammary Tumor
SRR7780859-SRR7780858	chr20	55674069	55674069	G	A	ZFR2	Missense_Mutation	ENSCAFT00000081535.1	exon10	c.G1745A	p.G582E	SNP	exonic	ZFR2		nonsynonymous SNV	ZFR2:ENSCAFT00000081535.1:exon10:c.G1745A:p.G582E,ZFR2:ENSCAFT00000030437.4:exon11:c.G1715A:p.G572E	SRP159481	Mammary Tumor
SRR7780859-SRR7780858	chr26	30730619	30730619	C	T	PI4KA	Missense_Mutation	ENSCAFT00000024235.4	exon40	c.C4556T	p.A1519V	SNP	exonic	PI4KA		nonsynonymous SNV	PI4KA:ENSCAFT00000024235.4:exon40:c.C4556T:p.A1519V	SRP159481	Mammary Tumor
SRR7780859-SRR7780858	chr3	27783814	27783814	C	T	BHMT2	Missense_Mutation	ENSCAFT00000014475.4	exon3	c.G232A	p.A78T	SNP	exonic	BHMT2		nonsynonymous SNV	BHMT2:ENSCAFT00000014475.4:exon3:c.G232A:p.A78T,BHMT2:ENSCAFT00000082282.1:exon3:c.G232A:p.A78T	SRP159481	Mammary Tumor
SRR7780859-SRR7780858	chr7	7041863	7041863	C	T	PLXNA2	Missense_Mutation	ENSCAFT00000002159.3	exon2	c.G1337A	p.R446H	SNP	exonic	PLXNA2		nonsynonymous SNV	PLXNA2:ENSCAFT00000002159.3:exon2:c.G1337A:p.R446H,PLXNA2:ENSCAFT00000018802.5:exon2:c.G1337A:p.R446H	SRP159481	Mammary Tumor
SRR7780859-SRR7780858	chr7	10100440	10100440	T	A	LPGAT1	Missense_Mutation	ENSCAFT00000019316.4	exon7	c.A984T	p.L328F	SNP	exonic	LPGAT1		nonsynonymous SNV	LPGAT1:ENSCAFT00000019316.4:exon7:c.A984T:p.L328F,LPGAT1:ENSCAFT00000078248.1:exon7:c.A942T:p.L314F,LPGAT1:ENSCAFT00000079583.1:exon7:c.A942T:p.L314F	SRP159481	Mammary Tumor
SRR7780859-SRR7780858	chr27	5982021	5982021	T	C	OR8S11	Missense_Mutation	ENSCAFT00000071361.1	exon1	c.A829G	p.S277G	SNP	exonic	OR8S11		nonsynonymous SNV	OR8S11:ENSCAFT00000071361.1:exon1:c.A829G:p.S277G	SRP159481	Mammary Tumor
SRR7780861-SRR7780862	chr13	2153010	2153010	A	G	RNF19A	Missense_Mutation	ENSCAFT00000000860.3	exon4	c.T1118C	p.V373A	SNP	exonic	RNF19A		nonsynonymous SNV	RNF19A:ENSCAFT00000000860.3:exon4:c.T1118C:p.V373A	SRP159481	Mammary Tumor
SRR7780861-SRR7780862	chr17	19167751	19167751	C	A	ADCY3	Missense_Mutation	ENSCAFT00000006552.4	exon8	c.G1610T	p.S537I	SNP	exonic	ADCY3		nonsynonymous SNV	ADCY3:ENSCAFT00000006552.4:exon8:c.G1610T:p.S537I	SRP159481	Mammary Tumor
SRR7780861-SRR7780862	chr2	81208971	81208971	C	T	ATP13A2	Missense_Mutation	ENSCAFT00000025109.4	exon14	c.C1336T	p.R446W	SNP	exonic	ATP13A2		nonsynonymous SNV	ATP13A2:ENSCAFT00000025109.4:exon14:c.C1336T:p.R446W	SRP159481	Mammary Tumor
SRR7780861-SRR7780862	chr3	72123150	72123150	G	A	RBM47	Missense_Mutation	ENSCAFT00000025193.4	exon2	c.G232A	p.G78S	SNP	exonic	RBM47		nonsynonymous SNV	RBM47:ENSCAFT00000025193.4:exon2:c.G232A:p.G78S,RBM47:ENSCAFT00000063297.1:exon2:c.G325A:p.G109S,RBM47:ENSCAFT00000069170.1:exon2:c.G382A:p.G128S	SRP159481	Mammary Tumor
SRR7780861-SRR7780862	chr38	20681171	20681171	C	T	OLFML2B	Missense_Mutation	ENSCAFT00000020753.4	exon5	c.C742T	p.P248S	SNP	exonic	OLFML2B		nonsynonymous SNV	OLFML2B:ENSCAFT00000020753.4:exon5:c.C742T:p.P248S	SRP159481	Mammary Tumor
SRR7780861-SRR7780862	chr7	12594840	12594840	A	G	CENPF	Missense_Mutation	ENSCAFT00000020009.4	exon12	c.A1865G	p.H622R	SNP	exonic	CENPF		nonsynonymous SNV	CENPF:ENSCAFT00000020009.4:exon12:c.A1865G:p.H622R,CENPF:ENSCAFT00000043283.2:exon12:c.A1850G:p.H617R	SRP159481	Mammary Tumor
SRR7780865-SRR7780864	chr4	31434672	31434672	T	G	NRG3	Missense_Mutation	ENSCAFT00000074176.1	exon5	c.T1048G	p.F350V	SNP	exonic	NRG3		nonsynonymous SNV	NRG3:ENSCAFT00000074176.1:exon5:c.T1048G:p.F350V,NRG3:ENSCAFT00000088613.1:exon5:c.T1048G:p.F350V	SRP159481	Mammary Tumor
SRR7780867-SRR7780866	chr1	120454077	120454077	G	A	TSHZ3	Missense_Mutation	ENSCAFT00000012149.5	exon2	c.G1597A	p.A533T	SNP	exonic	TSHZ3		nonsynonymous SNV	TSHZ3:ENSCAFT00000012149.5:exon2:c.G1597A:p.A533T	SRP159481	Mammary Tumor
SRR7780867-SRR7780866	chr15	4871939	4871939	G	A	RSPO1	Missense_Mutation	ENSCAFT00000005262.4	exon3	c.G260A	p.R87H	SNP	exonic	RSPO1		nonsynonymous SNV	RSPO1:ENSCAFT00000005262.4:exon3:c.G260A:p.R87H,RSPO1:ENSCAFT00000072711.1:exon3:c.G260A:p.R87H	SRP159481	Mammary Tumor
SRR7780867-SRR7780866	chr20	48659993	48659993	C	T	CCDC130	Missense_Mutation	ENSCAFT00000063433.1	exon8	c.G1168A	p.A390T	SNP	exonic	CCDC130		nonsynonymous SNV	CCDC130:ENSCAFT00000063433.1:exon8:c.G1168A:p.A390T,CCDC130:ENSCAFT00000026339.3:exon9:c.G853A:p.A285T	SRP159481	Mammary Tumor
SRR7780869-SRR7780868	chr1	23835627	23835627	G	A	MEX3C	Missense_Mutation	ENSCAFT00000000262.4	exon2	c.G1280A	p.R427K	SNP	exonic	MEX3C		nonsynonymous SNV	MEX3C:ENSCAFT00000000262.4:exon2:c.G1280A:p.R427K	SRP159481	Mammary Tumor
SRR7780869-SRR7780868	chr1	42084239	42084239	G	A	ESR1	Missense_Mutation	ENSCAFT00000060440.1	exon1	c.G59A	p.G20E	SNP	exonic	ESR1		nonsynonymous SNV	ESR1:ENSCAFT00000060440.1:exon1:c.G59A:p.G20E,ESR1:ENSCAFT00000000680.4:exon2:c.G59A:p.G20E	SRP159481	Mammary Tumor
SRR7780869-SRR7780868	chr1	105857016	105857016	G	A	KLK11	Missense_Mutation	ENSCAFT00000065555.1	exon4	c.G521A	p.R174Q	SNP	exonic	KLK11		nonsynonymous SNV	KLK11:ENSCAFT00000065555.1:exon4:c.G521A:p.R174Q,KLK11:ENSCAFT00000004612.5:exon5:c.G323A:p.R108Q	SRP159481	Mammary Tumor
SRR7780869-SRR7780868	chr10	1293532	1293532	G	A	LRP1	Missense_Mutation	ENSCAFT00000000295.5	exon14	c.G2314A	p.A772T	SNP	exonic	LRP1		nonsynonymous SNV	LRP1:ENSCAFT00000000295.5:exon14:c.G2314A:p.A772T,LRP1:ENSCAFT00000049824.3:exon14:c.G2314A:p.A772T,LRP1:ENSCAFT00000078799.1:exon14:c.G2314A:p.A772T	SRP159481	Mammary Tumor
SRR7780869-SRR7780868	chr10	1562055	1562055	T	A	INHBE	Missense_Mutation	ENSCAFT00000045533.2	exon3	c.T826A	p.Y276N	SNP	exonic	INHBE		nonsynonymous SNV	INHBE:ENSCAFT00000045533.2:exon3:c.T826A:p.Y276N,INHBE:ENSCAFT00000082110.1:exon3:c.T931A:p.Y311N	SRP159481	Mammary Tumor
SRR7780869-SRR7780868	chr11	1391909	1391909	C	T	GFPT2	Missense_Mutation	ENSCAFT00000093228.1	exon3	c.C505T	p.R169C	SNP	exonic	GFPT2		nonsynonymous SNV	GFPT2:ENSCAFT00000093228.1:exon3:c.C505T:p.R169C,GFPT2:ENSCAFT00000000718.4:exon4:c.C322T:p.R108C,GFPT2:ENSCAFT00000078334.1:exon4:c.C322T:p.R108C	SRP159481	Mammary Tumor
SRR7780869-SRR7780868	chr12	72349414	72349414	C	T	FAM120B	Missense_Mutation	ENSCAFT00000093475.1	exon5	c.C2273T	p.A758V	SNP	exonic	FAM120B		nonsynonymous SNV	FAM120B:ENSCAFT00000093475.1:exon5:c.C2273T:p.A758V,FAM120B:ENSCAFT00000006583.4:exon6:c.C2366T:p.A789V,FAM120B:ENSCAFT00000064311.1:exon6:c.C2366T:p.A789V,FAM120B:ENSCAFT00000066474.1:exon6:c.C2366T:p.A789V,FAM120B:ENSCAFT00000069448.1:exon6:c.C2366T:p.A789V,FAM120B:ENSCAFT00000071953.1:exon6:c.C2366T:p.A789V,FAM120B:ENSCAFT00000090428.1:exon6:c.C2366T:p.A789V,FAM120B:ENSCAFT00000093569.1:exon6:…	SRP159481	Mammary Tumor
SRR7780869-SRR7780868	chr13	37456248	37456248	G	A	PLEC	Missense_Mutation	ENSCAFT00000080857.1	exon21	c.C6704T	p.P2235L	SNP	exonic	PLEC		nonsynonymous SNV	PLEC:ENSCAFT00000080857.1:exon21:c.C6704T:p.P2235L,PLEC:ENSCAFT00000075183.1:exon31:c.C8018T:p.P2673L,PLEC:ENSCAFT00000060448.1:exon32:c.C7802T:p.P2601L,PLEC:ENSCAFT00000082428.1:exon32:c.C7805T:p.P2602L,PLEC:ENSCAFT00000047267.3:exon33:c.C6716T:p.P2239L,PLEC:ENSCAFT00000069777.1:exon33:c.C8333T:p.P2778L,PLEC:ENSCAFT00000070231.1:exon33:c.C8231T:p.P2744L,PLEC:ENSCAFT00000083528.1:exon33:c.C7886T:…	SRP159481	Mammary Tumor
SRR7780869-SRR7780868	chr16	55430565	55430565	G	A	CSMD1	Missense_Mutation	ENSCAFT00000013885.4	exon24	c.C3775T	p.R1259C	SNP	exonic	CSMD1		nonsynonymous SNV	CSMD1:ENSCAFT00000013885.4:exon24:c.C3775T:p.R1259C	SRP159481	Mammary Tumor
SRR7780869-SRR7780868	chr17	40334105	40334105	C	T	DNAH6	Missense_Mutation	ENSCAFT00000012666.5	exon5	c.G896A	p.R299Q	SNP	exonic	DNAH6		nonsynonymous SNV	DNAH6:ENSCAFT00000012666.5:exon5:c.G896A:p.R299Q	SRP159481	Mammary Tumor
SRR7780869-SRR7780868	chr18	13608106	13608106	G	A	PIK3CG	Missense_Mutation	ENSCAFT00000006384.4	exon1	c.C167T	p.T56M	SNP	exonic	PIK3CG		nonsynonymous SNV	PIK3CG:ENSCAFT00000006384.4:exon1:c.C167T:p.T56M,PIK3CG:ENSCAFT00000064500.1:exon1:c.C167T:p.T56M,PIK3CG:ENSCAFT00000089087.1:exon2:c.C167T:p.T56M	SRP159481	Mammary Tumor
SRR7780869-SRR7780868	chr18	42634418	42634418	C	T	LRP4	Missense_Mutation	ENSCAFT00000014294.4	exon11	c.C1093T	p.R365C	SNP	exonic	LRP4		nonsynonymous SNV	LRP4:ENSCAFT00000014294.4:exon11:c.C1093T:p.R365C,LRP4:ENSCAFT00000047302.3:exon11:c.C1435T:p.R479C	SRP159481	Mammary Tumor
SRR7780869-SRR7780868	chr18	53899714	53899714	T	G	TAF6L	Missense_Mutation	ENSCAFT00000062894.1	exon8	c.A980C	p.K327T	SNP	exonic	TAF6L		nonsynonymous SNV	TAF6L:ENSCAFT00000062894.1:exon8:c.A980C:p.K327T,TAF6L:ENSCAFT00000024787.5:exon10:c.A1076C:p.K359T	SRP159481	Mammary Tumor
SRR7780869-SRR7780868	chr20	40033845	40033845	G	A	CCDC71	Missense_Mutation	ENSCAFT00000018586.4	exon1	c.G7A	p.V3M	SNP	exonic	CCDC71		nonsynonymous SNV	CCDC71:ENSCAFT00000018586.4:exon1:c.G7A:p.V3M	SRP159481	Mammary Tumor
SRR7780869-SRR7780868	chr20	49308757	49308757	C	T	MAST1	Missense_Mutation	ENSCAFT00000027158.4	exon14	c.G1387A	p.A463T	SNP	exonic	MAST1		nonsynonymous SNV	MAST1:ENSCAFT00000027158.4:exon14:c.G1387A:p.A463T	SRP159481	Mammary Tumor
SRR7780869-SRR7780868	chr23	41291171	41291171	G	A	PLOD2	Missense_Mutation	ENSCAFT00000063167.1	exon19	c.C2204T	p.T735M	SNP	exonic	PLOD2		nonsynonymous SNV	PLOD2:ENSCAFT00000063167.1:exon19:c.C2204T:p.T735M,PLOD2:ENSCAFT00000070613.1:exon19:c.C2162T:p.T721M,PLOD2:ENSCAFT00000083083.1:exon19:c.C2120T:p.T707M,PLOD2:ENSCAFT00000012961.4:exon20:c.C2267T:p.T756M	SRP159481	Mammary Tumor
SRR7780869-SRR7780868	chr24	37321383	37321383	G	A	KCNG1	Missense_Mutation	ENSCAFT00000018351.4	exon2	c.C1322T	p.P441L	SNP	exonic	KCNG1		nonsynonymous SNV	KCNG1:ENSCAFT00000018351.4:exon2:c.C1322T:p.P441L	SRP159481	Mammary Tumor
SRR7780869-SRR7780868	chr26	18258916	18258916	G	A	SELPLG	Missense_Mutation	ENSCAFT00000047446.2	exon2	c.G1133A	p.R378H	SNP	exonic	SELPLG		nonsynonymous SNV	SELPLG:ENSCAFT00000047446.2:exon2:c.G1133A:p.R378H	SRP159481	Mammary Tumor
SRR7780869-SRR7780868	chr26	29365784	29365784	C	G	COMT	Missense_Mutation	ENSCAFT00000022647.4	exon1	c.G223C	p.E75Q	SNP	exonic	COMT		nonsynonymous SNV	COMT:ENSCAFT00000022647.4:exon1:c.G223C:p.E75Q	SRP159481	Mammary Tumor
SRR7780869-SRR7780868	chr28	40746371	40746371	C	T	ADGRA1	Missense_Mutation	ENSCAFT00000021738.4	exon6	c.C1594T	p.R532C	SNP	exonic	ADGRA1		nonsynonymous SNV	ADGRA1:ENSCAFT00000021738.4:exon6:c.C1594T:p.R532C	SRP159481	Mammary Tumor
SRR7780869-SRR7780868	chr29	1155470	1155470	A	C	SNAI2	Missense_Mutation	ENSCAFT00000010700.4	exon2	c.T369G	p.I123M	SNP	exonic	SNAI2		nonsynonymous SNV	SNAI2:ENSCAFT00000010700.4:exon2:c.T369G:p.I123M	SRP159481	Mammary Tumor
SRR7780869-SRR7780868	chr30	30057886	30057886	C	A	DENND4A	Missense_Mutation	ENSCAFT00000027320.3	exon10	c.G1429T	p.D477Y	SNP	exonic	DENND4A		nonsynonymous SNV	DENND4A:ENSCAFT00000027320.3:exon10:c.G1429T:p.D477Y,DENND4A:ENSCAFT00000046155.3:exon10:c.G1429T:p.D477Y,DENND4A:ENSCAFT00000050200.3:exon10:c.G1429T:p.D477Y,DENND4A:ENSCAFT00000061544.1:exon10:c.G1429T:p.D477Y,DENND4A:ENSCAFT00000084364.1:exon10:c.G1429T:p.D477Y,DENND4A:ENSCAFT00000087825.1:exon10:c.G1429T:p.D477Y,DENND4A:ENSCAFT00000088715.1:exon10:c.G1429T:p.D477Y,DENND4A:ENSCAFT00000089616.1…	SRP159481	Mammary Tumor
SRR7780869-SRR7780868	chr30	30241863	30241863	C	T	MEGF11	Missense_Mutation	ENSCAFT00000074652.1	exon19	c.G2602A	p.D868N	SNP	exonic	MEGF11		nonsynonymous SNV	MEGF11:ENSCAFT00000074652.1:exon19:c.G2602A:p.D868N,MEGF11:ENSCAFT00000093863.1:exon19:c.G2566A:p.D856N,MEGF11:ENSCAFT00000027347.4:exon20:c.G2695A:p.D899N,MEGF11:ENSCAFT00000027349.5:exon20:c.G2695A:p.D899N,MEGF11:ENSCAFT00000065698.1:exon20:c.G2695A:p.D899N,MEGF11:ENSCAFT00000087976.1:exon20:c.G2695A:p.D899N	SRP159481	Mammary Tumor
SRR7780869-SRR7780868	chr31	9936290	9936290	G	A	ROBO2	Missense_Mutation	ENSCAFT00000060896.1	exon2	c.C73T	p.R25C	SNP	exonic	ROBO2		nonsynonymous SNV	ROBO2:ENSCAFT00000060896.1:exon2:c.C73T:p.R25C,ROBO2:ENSCAFT00000077078.1:exon2:c.C73T:p.R25C,ROBO2:ENSCAFT00000092179.1:exon2:c.C121T:p.R41C	SRP159481	Mammary Tumor
SRR7780869-SRR7780868	chr34	12675553	12675553	G	C	PIK3CA	Missense_Mutation	ENSCAFT00000080543.1	exon20	c.G3019C	p.G1007R	SNP	exonic	PIK3CA		nonsynonymous SNV	PIK3CA:ENSCAFT00000080543.1:exon20:c.G3019C:p.G1007R	SRP159481	Mammary Tumor
SRR7780869-SRR7780868	chr4	7199266	7199266	G	A	SIPA1L2	Missense_Mutation	ENSCAFT00000018573.4	exon15	c.G3823A	p.V1275I	SNP	exonic	SIPA1L2		nonsynonymous SNV	SIPA1L2:ENSCAFT00000018573.4:exon15:c.G3823A:p.V1275I,SIPA1L2:ENSCAFT00000049173.3:exon15:c.G3823A:p.V1275I,SIPA1L2:ENSCAFT00000062259.1:exon15:c.G3823A:p.V1275I,SIPA1L2:ENSCAFT00000076745.1:exon15:c.G3823A:p.V1275I,SIPA1L2:ENSCAFT00000088612.1:exon15:c.G3823A:p.V1275I	SRP159481	Mammary Tumor
SRR7780869-SRR7780868	chr5	19554985	19554985	G	A	TMPRSS5	Missense_Mutation	ENSCAFT00000042961.3	exon6	c.G622A	p.G208S	SNP	exonic	TMPRSS5		nonsynonymous SNV	TMPRSS5:ENSCAFT00000042961.3:exon6:c.G622A:p.G208S,TMPRSS5:ENSCAFT00000021781.4:exon8:c.G646A:p.G216S,TMPRSS5:ENSCAFT00000077224.1:exon8:c.G676A:p.G226S	SRP159481	Mammary Tumor
SRR7780869-SRR7780868	chr5	32563059	32563059	C	T	TP53	Missense_Mutation	ENSCAFT00000086831.1	exon6	c.G709A	p.V237I	SNP	exonic	TP53		nonsynonymous SNV	TP53:ENSCAFT00000086831.1:exon6:c.G709A:p.V237I,TP53:ENSCAFT00000026465.4:exon8:c.G778A:p.V260I,TP53:ENSCAFT00000081814.1:exon8:c.G970A:p.V324I	SRP159481	Mammary Tumor
SRR7780869-SRR7780868	chr6	43026326	43026326	C	T	FNDC7	Missense_Mutation	ENSCAFT00000031706.4	exon4	c.G430A	p.V144I	SNP	exonic	FNDC7		nonsynonymous SNV	FNDC7:ENSCAFT00000031706.4:exon4:c.G430A:p.V144I	SRP159481	Mammary Tumor
SRR7780869-SRR7780868	chr6	52903703	52903703	T	G	PTBP2	Missense_Mutation	ENSCAFT00000031985.5	exon7	c.A688C	p.N230H	SNP	exonic	PTBP2		nonsynonymous SNV	PTBP2:ENSCAFT00000031985.5:exon7:c.A688C:p.N230H,PTBP2:ENSCAFT00000067256.1:exon7:c.A688C:p.N230H	SRP159481	Mammary Tumor
SRR7780869-SRR7780868	chr7	67225241	67225241	G	A	COLEC12	Missense_Mutation	ENSCAFT00000029120.4	exon4	c.C304T	p.R102C	SNP	exonic	COLEC12		nonsynonymous SNV	COLEC12:ENSCAFT00000029120.4:exon4:c.C304T:p.R102C,COLEC12:ENSCAFT00000049031.3:exon5:c.C355T:p.R119C	SRP159481	Mammary Tumor
SRR7780869-SRR7780868	chr7	76498668	76498668	C	T	PIEZO2	Missense_Mutation	ENSCAFT00000061702.1	exon44	c.G6575A	p.R2192Q	SNP	exonic	PIEZO2		nonsynonymous SNV	PIEZO2:ENSCAFT00000061702.1:exon44:c.G6575A:p.R2192Q,PIEZO2:ENSCAFT00000064321.1:exon44:c.G6575A:p.R2192Q,PIEZO2:ENSCAFT00000044099.3:exon45:c.G6428A:p.R2143Q,PIEZO2:ENSCAFT00000029783.4:exon46:c.G6650A:p.R2217Q	SRP159481	Mammary Tumor
SRR7780871-SRR7780870	chr13	39511377	39511377	G	A	ATP8A1	Missense_Mutation	ENSCAFT00000002869.4	exon12	c.C1067T	p.P356L	SNP	exonic	ATP8A1		nonsynonymous SNV	ATP8A1:ENSCAFT00000002869.4:exon12:c.C1067T:p.P356L,ATP8A1:ENSCAFT00000043202.3:exon12:c.C1154T:p.P385L,ATP8A1:ENSCAFT00000067761.1:exon12:c.C1154T:p.P385L,ATP8A1:ENSCAFT00000069751.1:exon12:c.C1067T:p.P356L,ATP8A1:ENSCAFT00000078163.1:exon12:c.C1067T:p.P356L,ATP8A1:ENSCAFT00000080866.1:exon12:c.C1154T:p.P385L	SRP159481	Mammary Tumor
SRR7780871-SRR7780870	chr8	3366390	3366390	G	A	CDH24	Missense_Mutation	ENSCAFT00000048428.3	exon4	c.C1031T	p.A344V	SNP	exonic	CDH24		nonsynonymous SNV	CDH24:ENSCAFT00000048428.3:exon4:c.C1031T:p.A344V,CDH24:ENSCAFT00000018121.5:exon5:c.C875T:p.A292V	SRP159481	Mammary Tumor
SRR7780876-SRR7780877	chr18	39586825	39586825	G	A	OR5J2B	Missense_Mutation	ENSCAFT00000012829.2	exon1	c.G694A	p.A232T	SNP	exonic	OR5J2B		nonsynonymous SNV	OR5J2B:ENSCAFT00000012829.2:exon1:c.G694A:p.A232T	SRP159481	Mammary Tumor
SRR7780876-SRR7780877	chr27	22261798	22261798	G	T	KRAS	Missense_Mutation	ENSCAFT00000010525.4	exon2	c.G317T	p.G106V	SNP	exonic	KRAS		nonsynonymous SNV	KRAS:ENSCAFT00000010525.4:exon2:c.G317T:p.G106V,KRAS:ENSCAFT00000093055.1:exon2:c.G317T:p.G106V	SRP159481	Mammary Tumor
SRR7780876-SRR7780877	chr28	12368659	12368659	G	A	GOT1	Missense_Mutation	ENSCAFT00000015047.4	exon2	c.C154T	p.P52S	SNP	exonic	GOT1		nonsynonymous SNV	GOT1:ENSCAFT00000015047.4:exon2:c.C154T:p.P52S,GOT1:ENSCAFT00000060427.1:exon2:c.C61T:p.P21S	SRP159481	Mammary Tumor
SRR7780876-SRR7780877	chr2	84006811	84006811	C	T	VPS13D	Missense_Mutation	ENSCAFT00000063815.1	exon53	c.G10834A	p.A3612T	SNP	exonic	VPS13D		nonsynonymous SNV	VPS13D:ENSCAFT00000063815.1:exon53:c.G10834A:p.A3612T,VPS13D:ENSCAFT00000066808.1:exon54:c.G10861A:p.A3621T,VPS13D:ENSCAFT00000077802.1:exon54:c.G10840A:p.A3614T,VPS13D:ENSCAFT00000025995.5:exon55:c.G11032A:p.A3678T,VPS13D:ENSCAFT00000069566.1:exon55:c.G11032A:p.A3678T,VPS13D:ENSCAFT00000075213.1:exon55:c.G11032A:p.A3678T,VPS13D:ENSCAFT00000083670.1:exon55:c.G11032A:p.A3678T,VPS13D:ENSCAFT0000002…	SRP159481	Mammary Tumor
SRR7780878-SRR7780879	chr1	41317549	41317549	T	A	MTHFD1L	Missense_Mutation	ENSCAFT00000000656.4	exon3	c.T199A	p.L67M	SNP	exonic	MTHFD1L		nonsynonymous SNV	MTHFD1L:ENSCAFT00000000656.4:exon3:c.T199A:p.L67M,MTHFD1L:ENSCAFT00000066094.1:exon3:c.T205A:p.L69M	SRP159481	Mammary Tumor
SRR7780878-SRR7780879	chr1	42571298	42571298	C	T	SYNE1	Missense_Mutation	ENSCAFT00000000760.5	exon77	c.G13357A	p.E4453K	SNP	exonic	SYNE1		nonsynonymous SNV	SYNE1:ENSCAFT00000000760.5:exon77:c.G13357A:p.E4453K,SYNE1:ENSCAFT00000043078.3:exon77:c.G13144A:p.E4382K	SRP159481	Mammary Tumor
SRR7780878-SRR7780879	chr1	121212266	121212266	G	A	ZNF536	Missense_Mutation	ENSCAFT00000012159.4	exon2	c.C191T	p.A64V	SNP	exonic	ZNF536		nonsynonymous SNV	ZNF536:ENSCAFT00000012159.4:exon2:c.C191T:p.A64V,ZNF536:ENSCAFT00000086226.1:exon2:c.C353T:p.A118V,ZNF536:ENSCAFT00000087176.1:exon2:c.C254T:p.A85V,ZNF536:ENSCAFT00000090663.1:exon2:c.C191T:p.A64V,ZNF536:ENSCAFT00000078602.1:exon3:c.C191T:p.A64V,ZNF536:ENSCAFT00000083327.1:exon3:c.C191T:p.A64V,ZNF536:ENSCAFT00000091424.1:exon3:c.C191T:p.A64V	SRP159481	Mammary Tumor
SRR7780878-SRR7780879	chr12	7754505	7754505	G	A	DNAH8	Missense_Mutation	ENSCAFT00000049946.2	exon34	c.G3895A	p.E1299K	SNP	exonic	DNAH8		nonsynonymous SNV	DNAH8:ENSCAFT00000049946.2:exon34:c.G3895A:p.E1299K	SRP159481	Mammary Tumor
SRR7780878-SRR7780879	chr13	29444668	29444668	T	C	TG	Missense_Mutation	ENSCAFT00000086072.1	exon33	c.T5948C	p.M1983T	SNP	exonic	TG		nonsynonymous SNV	TG:ENSCAFT00000086072.1:exon33:c.T5948C:p.M1983T,TG:ENSCAFT00000001727.4:exon34:c.T6119C:p.M2040T,TG:ENSCAFT00000043599.2:exon34:c.T6119C:p.M2040T,TG:ENSCAFT00000069608.1:exon34:c.T605C:p.M202T,TG:ENSCAFT00000072973.1:exon34:c.T6119C:p.M2040T	SRP159481	Mammary Tumor
SRR7780878-SRR7780879	chr13	37123378	37123378	G	T	MAFA	Missense_Mutation	ENSCAFT00000049608.1	exon1	c.C394A	p.H132N	SNP	exonic	MAFA		nonsynonymous SNV	MAFA:ENSCAFT00000049608.1:exon1:c.C394A:p.H132N	SRP159481	Mammary Tumor
SRR7780878-SRR7780879	chr2	15878552	15878552	C	A	ZNF438	Missense_Mutation	ENSCAFT00000006435.4	exon2	c.C170A	p.S57Y	SNP	exonic	ZNF438		nonsynonymous SNV	ZNF438:ENSCAFT00000006435.4:exon2:c.C170A:p.S57Y,ZNF438:ENSCAFT00000069654.1:exon2:c.C383A:p.S128Y,ZNF438:ENSCAFT00000049602.3:exon4:c.C200A:p.S67Y	SRP159481	Mammary Tumor
SRR7780878-SRR7780879	chr21	31894510	31894510	C	T	STK33	Missense_Mutation	ENSCAFT00000081739.1	exon11	c.G1180A	p.G394R	SNP	exonic	STK33		nonsynonymous SNV	STK33:ENSCAFT00000081739.1:exon11:c.G1180A:p.G394R,STK33:ENSCAFT00000011102.4:exon12:c.G1519A:p.G507R,STK33:ENSCAFT00000037463.4:exon12:c.G1294A:p.G432R,STK33:ENSCAFT00000059749.1:exon12:c.G1519A:p.G507R	SRP159481	Mammary Tumor
SRR7780878-SRR7780879	chr23	30603396	30603396	A	T	TF	Missense_Mutation	ENSCAFT00000010572.5	exon2	c.A121T	p.S41C	SNP	exonic	TF		nonsynonymous SNV	TF:ENSCAFT00000010572.5:exon2:c.A121T:p.S41C,TF:ENSCAFT00000044886.2:exon2:c.A121T:p.S41C,TF:ENSCAFT00000064772.1:exon2:c.A121T:p.S41C	SRP159481	Mammary Tumor
SRR7780878-SRR7780879	chr3	64802453	64802453	C	A	CC2D2A	Missense_Mutation	ENSCAFT00000087531.1	exon14	c.G1885T	p.D629Y	SNP	exonic	CC2D2A		nonsynonymous SNV	CC2D2A:ENSCAFT00000087531.1:exon14:c.G1885T:p.D629Y,CC2D2A:ENSCAFT00000060908.1:exon15:c.G1987T:p.D663Y,CC2D2A:ENSCAFT00000081786.1:exon15:c.G1987T:p.D663Y,CC2D2A:ENSCAFT00000089226.1:exon15:c.G1987T:p.D663Y,CC2D2A:ENSCAFT00000024358.4:exon16:c.G1669T:p.D557Y,CC2D2A:ENSCAFT00000060415.1:exon17:c.G1762T:p.D588Y	SRP159481	Mammary Tumor
SRR7780878-SRR7780879	chr4	38608379	38608379	G	T	CPEB4	Missense_Mutation	ENSCAFT00000084549.1	exon8	c.C1996A	p.Q666K	SNP	exonic	CPEB4		nonsynonymous SNV	CPEB4:ENSCAFT00000084549.1:exon8:c.C1996A:p.Q666K,CPEB4:ENSCAFT00000045015.3:exon9:c.C2047A:p.Q683K,CPEB4:ENSCAFT00000074269.1:exon9:c.C2020A:p.Q674K,CPEB4:ENSCAFT00000026541.3:exon10:c.C2071A:p.Q691K,CPEB4:ENSCAFT00000060501.1:exon10:c.C2086A:p.Q696K,CPEB4:ENSCAFT00000083142.1:exon11:c.C2110A:p.Q704K	SRP159481	Mammary Tumor
SRR7780878-SRR7780879	chr6	7828641	7828641	T	A	CUX1	Missense_Mutation	ENSCAFT00000042858.2	exon15	c.A1358T	p.H453L	SNP	exonic	CUX1		nonsynonymous SNV	CUX1:ENSCAFT00000042858.2:exon15:c.A1358T:p.H453L,CUX1:ENSCAFT00000074824.1:exon16:c.A1451T:p.H484L	SRP159481	Mammary Tumor
SRR7780878-SRR7780879	chr8	41452484	41452484	C	G	TMEM229B	Missense_Mutation	ENSCAFT00000026000.2	exon1	c.G394C	p.V132L	SNP	exonic	TMEM229B		nonsynonymous SNV	TMEM229B:ENSCAFT00000026000.2:exon1:c.G394C:p.V132L	SRP159481	Mammary Tumor
SRR7780878-SRR7780879	chr20	47615235	47615235	C	G	OR7A63	Missense_Mutation	ENSCAFT00000047519.1	exon1	c.C61G	p.L21V	SNP	exonic	OR7A63		nonsynonymous SNV	OR7A63:ENSCAFT00000047519.1:exon1:c.C61G:p.L21V	SRP159481	Mammary Tumor
SRR7780883-SRR7780882	chr15	4683102	4683102	A	G	MTF1	Missense_Mutation	ENSCAFT00000005215.3	exon2	c.A748G	p.T250A	SNP	exonic	MTF1		nonsynonymous SNV	MTF1:ENSCAFT00000005215.3:exon2:c.A748G:p.T250A	SRP159481	Mammary Tumor
SRR7780883-SRR7780882	chr15	13510299	13510299	G	T	CYP4X1	Missense_Mutation	ENSCAFT00000088366.1	exon10	c.C1309A	p.L437I	SNP	exonic	CYP4X1		nonsynonymous SNV	CYP4X1:ENSCAFT00000088366.1:exon10:c.C1309A:p.L437I,CYP4X1:ENSCAFT00000047547.3:exon11:c.C1354A:p.L452I,CYP4X1:ENSCAFT00000059974.1:exon11:c.C1288A:p.L430I,CYP4X1:ENSCAFT00000006579.3:exon12:c.C1390A:p.L464I	SRP159481	Mammary Tumor
SRR7780883-SRR7780882	chr2	43183764	43183764	G	A	IL31RA	Missense_Mutation	ENSCAFT00000011069.4	exon9	c.G1246A	p.V416I	SNP	exonic	IL31RA		nonsynonymous SNV	IL31RA:ENSCAFT00000011069.4:exon9:c.G1246A:p.V416I,IL31RA:ENSCAFT00000090817.1:exon9:c.G1246A:p.V416I	SRP159481	Mammary Tumor
SRR7780883-SRR7780882	chr21	47455443	47455443	G	A	SLC5A12	Missense_Mutation	ENSCAFT00000016148.4	exon3	c.C446T	p.A149V	SNP	exonic	SLC5A12		nonsynonymous SNV	SLC5A12:ENSCAFT00000016148.4:exon3:c.C446T:p.A149V,SLC5A12:ENSCAFT00000068712.1:exon3:c.C446T:p.A149V,SLC5A12:ENSCAFT00000071761.1:exon3:c.C446T:p.A149V	SRP159481	Mammary Tumor
SRR7780883-SRR7780882	chr24	25225643	25225643	G	A	DLGAP4	Missense_Mutation	ENSCAFT00000013523.4	exon2	c.G218A	p.R73H	SNP	exonic	DLGAP4		nonsynonymous SNV	DLGAP4:ENSCAFT00000013523.4:exon2:c.G218A:p.R73H,DLGAP4:ENSCAFT00000083340.1:exon2:c.G218A:p.R73H	SRP159481	Mammary Tumor
SRR7780883-SRR7780882	chr24	25629138	25629138	G	T	SAMHD1	Missense_Mutation	ENSCAFT00000092592.1	exon13	c.C1463A	p.T488N	SNP	exonic	SAMHD1		nonsynonymous SNV	SAMHD1:ENSCAFT00000092592.1:exon13:c.C1463A:p.T488N,SAMHD1:ENSCAFT00000064471.1:exon14:c.C1568A:p.T523N,SAMHD1:ENSCAFT00000013745.3:exon15:c.C1673A:p.T558N,SAMHD1:ENSCAFT00000063776.1:exon15:c.C1541A:p.T514N	SRP159481	Mammary Tumor
SRR7780883-SRR7780882	chr28	41112532	41112532	G	A	CYP2E1	Missense_Mutation	ENSCAFT00000077318.1	exon3	c.G383A	p.R128Q	SNP	exonic	CYP2E1		nonsynonymous SNV	CYP2E1:ENSCAFT00000077318.1:exon3:c.G383A:p.R128Q,CYP2E1:ENSCAFT00000038789.3:exon4:c.G386A:p.R129Q	SRP159481	Mammary Tumor
SRR7780883-SRR7780882	chr34	12675674	12675674	A	G	PIK3CA	Missense_Mutation	ENSCAFT00000080543.1	exon20	c.A3140G	p.H1047R	SNP	exonic	PIK3CA		nonsynonymous SNV	PIK3CA:ENSCAFT00000080543.1:exon20:c.A3140G:p.H1047R	SRP159481	Mammary Tumor
SRR7780883-SRR7780882	chr35	16510240	16510240	C	A	FAM8A1	Missense_Mutation	ENSCAFT00000049820.2	exon4	c.C962A	p.T321K	SNP	exonic	FAM8A1		nonsynonymous SNV	FAM8A1:ENSCAFT00000049820.2:exon4:c.C962A:p.T321K	SRP159481	Mammary Tumor
SRR7780883-SRR7780882	chr7	10301881	10301881	G	A	INTS7	Missense_Mutation	ENSCAFT00000070309.1	exon3	c.C283T	p.R95C	SNP	exonic	INTS7		nonsynonymous SNV	INTS7:ENSCAFT00000070309.1:exon3:c.C283T:p.R95C,INTS7:ENSCAFT00000019428.5:exon4:c.C430T:p.R144C,INTS7:ENSCAFT00000080202.1:exon4:c.C430T:p.R144C	SRP159481	Mammary Tumor
SRR7780887-SRR7780886	chr18	42400110	42400110	G	A	ARFGAP2	Missense_Mutation	ENSCAFT00000014154.4	exon2	c.G113A	p.S38N	SNP	exonic	ARFGAP2		nonsynonymous SNV	ARFGAP2:ENSCAFT00000014154.4:exon2:c.G113A:p.S38N,ARFGAP2:ENSCAFT00000069298.1:exon2:c.G113A:p.S38N,ARFGAP2:ENSCAFT00000079791.1:exon2:c.G113A:p.S38N,ARFGAP2:ENSCAFT00000089177.1:exon2:c.G113A:p.S38N,ARFGAP2:ENSCAFT00000091907.1:exon2:c.G113A:p.S38N	SRP159481	Mammary Tumor
SRR7780887-SRR7780886	chr2	21502694	21502694	C	T	FAM171A1	Missense_Mutation	ENSCAFT00000007527.5	exon7	c.C1034T	p.A345V	SNP	exonic	FAM171A1		nonsynonymous SNV	FAM171A1:ENSCAFT00000007527.5:exon7:c.C1034T:p.A345V	SRP159481	Mammary Tumor
SRR7780887-SRR7780886	chr2	53520808	53520808	T	C	PIK3R1	Missense_Mutation	ENSCAFT00000061673.1	exon5	c.T557C	p.F186S	SNP	exonic	PIK3R1		nonsynonymous SNV	PIK3R1:ENSCAFT00000061673.1:exon5:c.T557C:p.F186S,PIK3R1:ENSCAFT00000068054.1:exon5:c.T656C:p.F219S,PIK3R1:ENSCAFT00000076972.1:exon5:c.T467C:p.F156S,PIK3R1:ENSCAFT00000074878.1:exon10:c.T1295C:p.F432S,PIK3R1:ENSCAFT00000012216.4:exon11:c.T1370C:p.F457S	SRP159481	Mammary Tumor
SRR7780887-SRR7780886	chr30	8180372	8180372	T	C	INO80	Missense_Mutation	ENSCAFT00000015097.4	exon13	c.A1741G	p.T581A	SNP	exonic	INO80		nonsynonymous SNV	INO80:ENSCAFT00000015097.4:exon13:c.A1741G:p.T581A	SRP159481	Mammary Tumor
SRR7780887-SRR7780886	chr6	61955691	61955691	C	G	COL24A1	Missense_Mutation	ENSCAFT00000035747.3	exon3	c.C699G	p.D233E	SNP	exonic	COL24A1		nonsynonymous SNV	COL24A1:ENSCAFT00000035747.3:exon3:c.C699G:p.D233E	SRP159481	Mammary Tumor
SRR7780889-SRR7780888	chr17	15996997	15996997	C	A	TDRD15	Missense_Mutation	ENSCAFT00000045655.2	exon1	c.C4471A	p.Q1491K	SNP	exonic	TDRD15		nonsynonymous SNV	TDRD15:ENSCAFT00000045655.2:exon1:c.C4471A:p.Q1491K,TDRD15:ENSCAFT00000085468.1:exon3:c.C4516A:p.Q1506K	SRP159481	Mammary Tumor
SRR7780889-SRR7780888	chr17	58776969	58776969	G	A	TXNIP	Missense_Mutation	ENSCAFT00000018124.4	exon8	c.C1151T	p.S384F	SNP	exonic	TXNIP		nonsynonymous SNV	TXNIP:ENSCAFT00000018124.4:exon8:c.C1151T:p.S384F,TXNIP:ENSCAFT00000082295.1:exon9:c.C983T:p.S328F	SRP159481	Mammary Tumor
SRR7780889-SRR7780888	chr17	63478338	63478338	A	G	KCND3	Missense_Mutation	ENSCAFT00000021670.4	exon2	c.A598G	p.N200D	SNP	exonic	KCND3		nonsynonymous SNV	KCND3:ENSCAFT00000021670.4:exon2:c.A598G:p.N200D,KCND3:ENSCAFT00000062510.1:exon2:c.A598G:p.N200D,KCND3:ENSCAFT00000092153.1:exon2:c.A598G:p.N200D,KCND3:ENSCAFT00000093480.1:exon2:c.A598G:p.N200D	SRP159481	Mammary Tumor
SRR7780889-SRR7780888	chr19	37287582	37287582	C	T	MGAT5	Missense_Mutation	ENSCAFT00000008054.4	exon12	c.C1445T	p.S482F	SNP	exonic	MGAT5		nonsynonymous SNV	MGAT5:ENSCAFT00000008054.4:exon12:c.C1445T:p.S482F	SRP159481	Mammary Tumor
SRR7780889-SRR7780888	chr2	46070388	46070388	G	A	PDE4D	Missense_Mutation	ENSCAFT00000011394.4	exon2	c.C169T	p.R57C	SNP	exonic	PDE4D		nonsynonymous SNV	PDE4D:ENSCAFT00000011394.4:exon2:c.C169T:p.R57C,PDE4D:ENSCAFT00000060239.1:exon2:c.C559T:p.R187C,PDE4D:ENSCAFT00000071129.1:exon2:c.C370T:p.R124C,PDE4D:ENSCAFT00000076356.1:exon2:c.C151T:p.R51C,PDE4D:ENSCAFT00000085150.1:exon2:c.C229T:p.R77C,PDE4D:ENSCAFT00000093462.1:exon2:c.C193T:p.R65C,PDE4D:ENSCAFT00000081820.1:exon3:c.C376T:p.R126C	SRP159481	Mammary Tumor
SRR7780889-SRR7780888	chr20	13223939	13223939	C	T	SETMAR	Missense_Mutation	ENSCAFT00000009611.4	exon1	c.G64A	p.E22K	SNP	exonic	SETMAR		nonsynonymous SNV	SETMAR:ENSCAFT00000009611.4:exon1:c.G64A:p.E22K	SRP159481	Mammary Tumor
SRR7780889-SRR7780888	chr21	31501615	31501615	C	T	NLRP10	Missense_Mutation	ENSCAFT00000011053.4	exon1	c.G2002A	p.G668R	SNP	exonic	NLRP10		nonsynonymous SNV	NLRP10:ENSCAFT00000011053.4:exon1:c.G2002A:p.G668R	SRP159481	Mammary Tumor
SRR7780889-SRR7780888	chr21	33794795	33794795	C	T	IRAG1	Missense_Mutation	ENSCAFT00000012173.4	exon6	c.G607A	p.A203T	SNP	exonic	IRAG1		nonsynonymous SNV	IRAG1:ENSCAFT00000012173.4:exon6:c.G607A:p.A203T,IRAG1:ENSCAFT00000072996.1:exon6:c.G607A:p.A203T,IRAG1:ENSCAFT00000082301.1:exon6:c.G679A:p.A227T	SRP159481	Mammary Tumor
SRR7780889-SRR7780888	chr23	26579198	26579198	G	C	GALNT15	Missense_Mutation	ENSCAFT00000009498.4	exon3	c.C846G	p.H282Q	SNP	exonic	GALNT15		nonsynonymous SNV	GALNT15:ENSCAFT00000009498.4:exon3:c.C846G:p.H282Q	SRP159481	Mammary Tumor
SRR7780889-SRR7780888	chr23	49045484	49045484	G	A	MME	Missense_Mutation	ENSCAFT00000075964.1	exon15	c.G1621A	p.G541R	SNP	exonic	MME		nonsynonymous SNV	MME:ENSCAFT00000075964.1:exon15:c.G1621A:p.G541R,MME:ENSCAFT00000047417.3:exon16:c.G1687A:p.G563R,MME:ENSCAFT00000082438.1:exon16:c.G1543A:p.G515R,MME:ENSCAFT00000091049.1:exon16:c.G1786A:p.G596R,MME:ENSCAFT00000013874.4:exon17:c.G1723A:p.G575R	SRP159481	Mammary Tumor
SRR7780889-SRR7780888	chr25	18604122	18604122	G	A	CENPJ	Missense_Mutation	ENSCAFT00000062814.1	exon11	c.G3080A	p.R1027H	SNP	exonic	CENPJ		nonsynonymous SNV	CENPJ:ENSCAFT00000062814.1:exon11:c.G3080A:p.R1027H,CENPJ:ENSCAFT00000076673.1:exon11:c.G3137A:p.R1046H,CENPJ:ENSCAFT00000011844.4:exon12:c.G3380A:p.R1127H,CENPJ:ENSCAFT00000075824.1:exon12:c.G3380A:p.R1127H	SRP159481	Mammary Tumor
SRR7780889-SRR7780888	chr28	15760029	15760029	G	A	TAF5	Missense_Mutation	ENSCAFT00000016513.4	exon9	c.G1958A	p.R653Q	SNP	exonic	TAF5		nonsynonymous SNV	TAF5:ENSCAFT00000016513.4:exon9:c.G1958A:p.R653Q	SRP159481	Mammary Tumor
SRR7780889-SRR7780888	chr29	4030441	4030441	C	T	ST18	Missense_Mutation	ENSCAFT00000062004.1	exon3	c.G890A	p.R297Q	SNP	exonic	ST18		nonsynonymous SNV	ST18:ENSCAFT00000062004.1:exon3:c.G890A:p.R297Q,ST18:ENSCAFT00000010894.4:exon4:c.G965A:p.R322Q,ST18:ENSCAFT00000071654.1:exon4:c.G965A:p.R322Q,ST18:ENSCAFT00000078043.1:exon4:c.G965A:p.R322Q	SRP159481	Mammary Tumor
SRR7780889-SRR7780888	chr33	864138	864138	G	A	EPHA3	Missense_Mutation	ENSCAFT00000014024.4	exon3	c.G599A	p.R200K	SNP	exonic	EPHA3		nonsynonymous SNV	EPHA3:ENSCAFT00000014024.4:exon3:c.G599A:p.R200K,EPHA3:ENSCAFT00000090889.1:exon3:c.G461A:p.R154K	SRP159481	Mammary Tumor
SRR7780889-SRR7780888	chr38	964046	964046	G	A	PPP1R15B	Missense_Mutation	ENSCAFT00000015335.3	exon1	c.C1208T	p.S403L	SNP	exonic	PPP1R15B		nonsynonymous SNV	PPP1R15B:ENSCAFT00000015335.3:exon1:c.C1208T:p.S403L	SRP159481	Mammary Tumor
SRR7780889-SRR7780888	chr6	39999013	39999013	G	T	CAPN15	Missense_Mutation	ENSCAFT00000031272.6	exon7	c.C2510A	p.A837E	SNP	exonic	CAPN15		nonsynonymous SNV	CAPN15:ENSCAFT00000031272.6:exon7:c.C2510A:p.A837E,CAPN15:ENSCAFT00000043434.2:exon8:c.C2594A:p.A865E,CAPN15:ENSCAFT00000072558.1:exon8:c.C2594A:p.A865E	SRP159481	Mammary Tumor
SRR7780889-SRR7780888	chr7	24278060	24278060	G	C	TNN	Missense_Mutation	ENSCAFT00000022816.4	exon9	c.C1865G	p.T622R	SNP	exonic	TNN		nonsynonymous SNV	TNN:ENSCAFT00000022816.4:exon9:c.C1865G:p.T622R,TNN:ENSCAFT00000049954.3:exon9:c.C1865G:p.T622R,TNN:ENSCAFT00000064335.1:exon9:c.C1865G:p.T622R,TNN:ENSCAFT00000076911.1:exon9:c.C1865G:p.T622R,TNN:ENSCAFT00000077345.1:exon9:c.C1865G:p.T622R,TNN:ENSCAFT00000079756.1:exon9:c.C1865G:p.T622R,TNN:ENSCAFT00000086781.1:exon9:c.C1865G:p.T622R,TNN:ENSCAFT00000090104.1:exon9:c.C1865G:p.T622R	SRP159481	Mammary Tumor
SRR7780889-SRR7780888	chr7	53573228	53573228	C	T	FHOD3	Missense_Mutation	ENSCAFT00000028200.5	exon11	c.G1303A	p.E435K	SNP	exonic	FHOD3		nonsynonymous SNV	FHOD3:ENSCAFT00000028200.5:exon11:c.G1303A:p.E435K,FHOD3:ENSCAFT00000044593.3:exon11:c.G1303A:p.E435K	SRP159481	Mammary Tumor
SRR7780891-SRR7780890	chr1	110816837	110816837	C	T	CEACAM20	Missense_Mutation	ENSCAFT00000036986.3	exon6	c.C1085T	p.A362V	SNP	exonic	CEACAM20		nonsynonymous SNV	CEACAM20:ENSCAFT00000036986.3:exon6:c.C1085T:p.A362V,CEACAM20:ENSCAFT00000047731.3:exon6:c.C950T:p.A317V	SRP159481	Mammary Tumor
SRR7780891-SRR7780890	chr10	46287595	46287595	G	A	ABCG5	Missense_Mutation	ENSCAFT00000003956.3	exon5	c.C601T	p.R201W	SNP	exonic	ABCG5		nonsynonymous SNV	ABCG5:ENSCAFT00000003956.3:exon5:c.C601T:p.R201W,ABCG5:ENSCAFT00000086130.1:exon5:c.C601T:p.R201W	SRP159481	Mammary Tumor
SRR7780891-SRR7780890	chr15	59607758	59607758	G	T	NPY5R	Missense_Mutation	ENSCAFT00000046926.2	exon1	c.G848T	p.R283I	SNP	exonic	NPY5R		nonsynonymous SNV	NPY5R:ENSCAFT00000046926.2:exon1:c.G848T:p.R283I	SRP159481	Mammary Tumor
SRR7780891-SRR7780890	chr19	15327436	15327436	G	A	FAT4	Missense_Mutation	ENSCAFT00000006363.5	exon1	c.C4610T	p.A1537V	SNP	exonic	FAT4		nonsynonymous SNV	FAT4:ENSCAFT00000006363.5:exon1:c.C4610T:p.A1537V,FAT4:ENSCAFT00000059626.1:exon1:c.C4610T:p.A1537V,FAT4:ENSCAFT00000084540.1:exon1:c.C4610T:p.A1537V	SRP159481	Mammary Tumor
SRR7780891-SRR7780890	chr28	36898368	36898368	G	T	PTPRE	Missense_Mutation	ENSCAFT00000083471.1	exon17	c.G2068T	p.D690Y	SNP	exonic	PTPRE		nonsynonymous SNV	PTPRE:ENSCAFT00000083471.1:exon17:c.G2068T:p.D690Y,PTPRE:ENSCAFT00000062730.1:exon19:c.G2452T:p.D818Y,PTPRE:ENSCAFT00000021005.4:exon20:c.G2413T:p.D805Y,PTPRE:ENSCAFT00000070815.1:exon20:c.G2281T:p.D761Y,PTPRE:ENSCAFT00000077008.1:exon20:c.G2482T:p.D828Y,PTPRE:ENSCAFT00000093081.1:exon20:c.G2653T:p.D885Y	SRP159481	Mammary Tumor
SRR7780891-SRR7780890	chr37	25409711	25409711	G	T	PRKAG3	Missense_Mutation	ENSCAFT00000060150.1	exon7	c.C925A	p.R309S	SNP	exonic	PRKAG3		nonsynonymous SNV	PRKAG3:ENSCAFT00000060150.1:exon7:c.C925A:p.R309S,PRKAG3:ENSCAFT00000090153.1:exon7:c.C925A:p.R309S,PRKAG3:ENSCAFT00000007921.3:exon9:c.C1243A:p.R415S,PRKAG3:ENSCAFT00000023757.5:exon9:c.C907A:p.R303S	SRP159481	Mammary Tumor
SRR7780891-SRR7780890	chr18	39925200	39925200	T	C	OR10AG68	Missense_Mutation	ENSCAFT00000060201.1	exon1	c.A448G	p.M150V	SNP	exonic	OR10AG68		nonsynonymous SNV	OR10AG68:ENSCAFT00000060201.1:exon1:c.A448G:p.M150V	SRP159481	Mammary Tumor
SRR7780891-SRR7780890	chr27	9682	9682	G	T	OR6C83	Missense_Mutation	ENSCAFT00000091742.1	exon1	c.C174A	p.F58L	SNP	exonic	OR6C83		nonsynonymous SNV	OR6C83:ENSCAFT00000091742.1:exon1:c.C174A:p.F58L	SRP159481	Mammary Tumor
SRR7780900-SRR7780899	chr11	21184554	21184554	T	C	AFF4	Missense_Mutation	ENSCAFT00000001444.5	exon5	c.A1021G	p.T341A	SNP	exonic	AFF4		nonsynonymous SNV	AFF4:ENSCAFT00000001444.5:exon5:c.A1021G:p.T341A,AFF4:ENSCAFT00000001440.4:exon6:c.A1108G:p.T370A	SRP159481	Mammary Tumor
SRR7780900-SRR7780899	chr32	37690896	37690896	G	T	SEC24D	Missense_Mutation	ENSCAFT00000061784.1	exon22	c.C2800A	p.L934I	SNP	exonic	SEC24D		nonsynonymous SNV	SEC24D:ENSCAFT00000061784.1:exon22:c.C2800A:p.L934I,SEC24D:ENSCAFT00000092813.1:exon22:c.C2959A:p.L987I,SEC24D:ENSCAFT00000019635.4:exon23:c.C3064A:p.L1022I,SEC24D:ENSCAFT00000069042.1:exon24:c.C2965A:p.L989I	SRP159481	Mammary Tumor
SRR7780900-SRR7780899	chr7	31321944	31321944	C	T	GPA33	Missense_Mutation	ENSCAFT00000024704.4	exon6	c.C713T	p.A238V	SNP	exonic	GPA33		nonsynonymous SNV	GPA33:ENSCAFT00000024704.4:exon6:c.C713T:p.A238V,GPA33:ENSCAFT00000073355.1:exon6:c.C689T:p.A230V	SRP159481	Mammary Tumor
SRR7780902-SRR7780901	chr1	106674265	106674265	C	T	TBC1D17	Missense_Mutation	ENSCAFT00000046072.3	exon16	c.G2014A	p.E672K	SNP	exonic	TBC1D17		nonsynonymous SNV	TBC1D17:ENSCAFT00000046072.3:exon16:c.G2014A:p.E672K,TBC1D17:ENSCAFT00000079600.1:exon16:c.G1825A:p.E609K,TBC1D17:ENSCAFT00000005586.3:exon17:c.G1924A:p.E642K	SRP159481	Mammary Tumor
SRR7780902-SRR7780901	chr1	109900169	109900169	G	A	GIPR	Missense_Mutation	ENSCAFT00000089507.1	exon13	c.C1202T	p.T401M	SNP	exonic	GIPR		nonsynonymous SNV	GIPR:ENSCAFT00000089507.1:exon13:c.C1202T:p.T401M	SRP159481	Mammary Tumor
SRR7780902-SRR7780901	chr1	116786714	116786714	C	A	KIRREL2	Missense_Mutation	ENSCAFT00000010826.4	exon13	c.G1482T	p.K494N	SNP	exonic	KIRREL2		nonsynonymous SNV	KIRREL2:ENSCAFT00000010826.4:exon13:c.G1482T:p.K494N,KIRREL2:ENSCAFT00000061220.1:exon13:c.G1527T:p.K509N,KIRREL2:ENSCAFT00000077714.1:exon14:c.G1632T:p.K544N,KIRREL2:ENSCAFT00000082580.1:exon14:c.G1632T:p.K544N	SRP159481	Mammary Tumor
SRR7780902-SRR7780901	chr20	57303345	57303345	G	A	MBD3	Missense_Mutation	ENSCAFT00000031004.4	exon3	c.G238A	p.V80I	SNP	exonic	MBD3		nonsynonymous SNV	MBD3:ENSCAFT00000031004.4:exon3:c.G238A:p.V80I,MBD3:ENSCAFT00000060243.1:exon3:c.G364A:p.V122I,MBD3:ENSCAFT00000064384.1:exon3:c.G364A:p.V122I,MBD3:ENSCAFT00000067993.1:exon3:c.G205A:p.V69I	SRP159481	Mammary Tumor
SRR7780902-SRR7780901	chr21	29155316	29155316	G	A	OR56A9	Missense_Mutation	ENSCAFT00000082872.1	exon1	c.G142A	p.V48I	SNP	exonic	OR56A9		nonsynonymous SNV	OR56A9:ENSCAFT00000082872.1:exon1:c.G142A:p.V48I	SRP159481	Mammary Tumor
SRR7780902-SRR7780901	chr27	2641218	2641218	G	A	KRT75	Missense_Mutation	ENSCAFT00000011617.4	exon6	c.G1177A	p.A393T	SNP	exonic	KRT75		nonsynonymous SNV	KRT75:ENSCAFT00000011617.4:exon6:c.G1177A:p.A393T,KRT75:ENSCAFT00000044206.2:exon6:c.G1177A:p.A393T	SRP159481	Mammary Tumor
SRR7780902-SRR7780901	chr30	28230196	28230196	G	T	HERC1	Missense_Mutation	ENSCAFT00000026962.5	exon53	c.C10328A	p.A3443E	SNP	exonic	HERC1		nonsynonymous SNV	HERC1:ENSCAFT00000026962.5:exon53:c.C10328A:p.A3443E	SRP159481	Mammary Tumor
SRR7780902-SRR7780901	chr31	24020097	24020097	C	T	RWDD2B	Missense_Mutation	ENSCAFT00000013653.4	exon3	c.G22A	p.E8K	SNP	exonic	RWDD2B		nonsynonymous SNV	RWDD2B:ENSCAFT00000013653.4:exon3:c.G22A:p.E8K,RWDD2B:ENSCAFT00000068726.1:exon3:c.G112A:p.E38K	SRP159481	Mammary Tumor
SRR7780902-SRR7780901	chr34	12675674	12675674	A	G	PIK3CA	Missense_Mutation	ENSCAFT00000080543.1	exon20	c.A3140G	p.H1047R	SNP	exonic	PIK3CA		nonsynonymous SNV	PIK3CA:ENSCAFT00000080543.1:exon20:c.A3140G:p.H1047R	SRP159481	Mammary Tumor
SRR7780902-SRR7780901	chr38	21926349	21926349	G	A	COPA	Missense_Mutation	ENSCAFT00000073814.1	exon15	c.G1427A	p.C476Y	SNP	exonic	COPA		nonsynonymous SNV	COPA:ENSCAFT00000073814.1:exon15:c.G1427A:p.C476Y,COPA:ENSCAFT00000019919.5:exon18:c.G1724A:p.C575Y	SRP159481	Mammary Tumor
SRR7780902-SRR7780901	chr6	11743696	11743696	C	T	RAC1	Missense_Mutation	ENSCAFT00000024896.3	exon2	c.C550T	p.P184S	SNP	exonic	RAC1		nonsynonymous SNV	RAC1:ENSCAFT00000024896.3:exon2:c.C550T:p.P184S,RAC1:ENSCAFT00000036656.4:exon2:c.C550T:p.P184S,RAC1:ENSCAFT00000059668.1:exon2:c.C73T:p.P25S,RAC1:ENSCAFT00000071780.1:exon3:c.C160T:p.P54S	SRP159481	Mammary Tumor
SRR7780902-SRR7780901	chr8	4081096	4081096	C	A	CPNE6	Missense_Mutation	ENSCAFT00000062870.1	exon5	c.C470A	p.T157N	SNP	exonic	CPNE6		nonsynonymous SNV	CPNE6:ENSCAFT00000062870.1:exon5:c.C470A:p.T157N,CPNE6:ENSCAFT00000018751.4:exon6:c.C470A:p.T157N	SRP159481	Mammary Tumor
SRR7780902-SRR7780901	chr8	70972946	70972946	G	A	TNFAIP2	Missense_Mutation	ENSCAFT00000028898.5	exon6	c.G1720A	p.G574S	SNP	exonic	TNFAIP2		nonsynonymous SNV	TNFAIP2:ENSCAFT00000028898.5:exon6:c.G1720A:p.G574S	SRP159481	Mammary Tumor
SRR7780902-SRR7780901	chr9	52496500	52496500	G	T	RAPGEF1	Missense_Mutation	ENSCAFT00000031664.4	exon2	c.G151T	p.V51L	SNP	exonic	RAPGEF1		nonsynonymous SNV	RAPGEF1:ENSCAFT00000031664.4:exon2:c.G151T:p.V51L,RAPGEF1:ENSCAFT00000045043.3:exon2:c.G175T:p.V59L,RAPGEF1:ENSCAFT00000067952.1:exon2:c.G175T:p.V59L,RAPGEF1:ENSCAFT00000076423.1:exon2:c.G175T:p.V59L,RAPGEF1:ENSCAFT00000081947.1:exon2:c.G175T:p.V59L,RAPGEF1:ENSCAFT00000085482.1:exon2:c.G175T:p.V59L,RAPGEF1:ENSCAFT00000088018.1:exon2:c.G175T:p.V59L,RAPGEF1:ENSCAFT00000090926.1:exon2:c.G187T:p.V63L	SRP159481	Mammary Tumor
SRR7780909-SRR7780908	chr13	12473984	12473984	T	G	CSMD3	Missense_Mutation	ENSCAFT00000001231.4	exon50	c.A7607C	p.N2536T	SNP	exonic	CSMD3		nonsynonymous SNV	CSMD3:ENSCAFT00000001231.4:exon50:c.A7607C:p.N2536T,CSMD3:ENSCAFT00000001238.5:exon51:c.A7919C:p.N2640T	SRP159481	Mammary Tumor
SRR7780909-SRR7780908	chr18	39941901	39941901	A	C	OR10AG66	Missense_Mutation	ENSCAFT00000087905.1	exon2	c.A188C	p.K63T	SNP	exonic	OR10AG66		nonsynonymous SNV	OR10AG66:ENSCAFT00000087905.1:exon2:c.A188C:p.K63T	SRP159481	Mammary Tumor
SRR7780909-SRR7780908	chr38	21303589	21303589	G	A	B4GALT3	Missense_Mutation	ENSCAFT00000043660.2	exon3	c.G407A	p.R136H	SNP	exonic	B4GALT3		nonsynonymous SNV	B4GALT3:ENSCAFT00000043660.2:exon3:c.G407A:p.R136H,B4GALT3:ENSCAFT00000072190.1:exon3:c.G407A:p.R136H	SRP159481	Mammary Tumor
SRR7780909-SRR7780908	chr6	38216218	38216218	C	T	KREMEN2	Missense_Mutation	ENSCAFT00000030732.6	exon6	c.G752A	p.G251D	SNP	exonic	KREMEN2		nonsynonymous SNV	KREMEN2:ENSCAFT00000030732.6:exon6:c.G752A:p.G251D	SRP159481	Mammary Tumor
SRR7780909-SRR7780908	chr8	72326481	72326481	C	T	AKT1	Missense_Mutation	ENSCAFT00000029177.4	exon2	c.G49A	p.E17K	SNP	exonic	AKT1		nonsynonymous SNV	AKT1:ENSCAFT00000029177.4:exon2:c.G49A:p.E17K,AKT1:ENSCAFT00000066075.1:exon2:c.G49A:p.E17K	SRP159481	Mammary Tumor
SRR7780911-SRR7780910	chr1	106338151	106338151	A	G	NR1H2	Missense_Mutation	ENSCAFT00000005346.4	exon3	c.T4C	p.S2P	SNP	exonic	NR1H2		nonsynonymous SNV	NR1H2:ENSCAFT00000005346.4:exon3:c.T4C:p.S2P,NR1H2:ENSCAFT00000079748.1:exon3:c.T4C:p.S2P	SRP159481	Mammary Tumor
SRR7780911-SRR7780910	chr14	2352206	2352206	G	A	OR2M9	Missense_Mutation	ENSCAFT00000037237.3	exon1	c.C364T	p.R122C	SNP	exonic	OR2M9		nonsynonymous SNV	OR2M9:ENSCAFT00000037237.3:exon1:c.C364T:p.R122C	SRP159481	Mammary Tumor
SRR7780911-SRR7780910	chr18	45357831	45357831	A	G	AP2A2	Missense_Mutation	ENSCAFT00000015398.4	exon22	c.A2731G	p.M911V	SNP	exonic	AP2A2		nonsynonymous SNV	AP2A2:ENSCAFT00000015398.4:exon22:c.A2731G:p.M911V,AP2A2:ENSCAFT00000083847.1:exon22:c.A2809G:p.M937V	SRP159481	Mammary Tumor
SRR7780911-SRR7780910	chr29	41461072	41461072	C	A	CPQ	Missense_Mutation	ENSCAFT00000039387.3	exon8	c.C1267A	p.L423I	SNP	exonic	CPQ		nonsynonymous SNV	CPQ:ENSCAFT00000039387.3:exon8:c.C1267A:p.L423I,CPQ:ENSCAFT00000067593.1:exon8:c.C1423A:p.L475I,CPQ:ENSCAFT00000077186.1:exon8:c.C1345A:p.L449I,CPQ:ENSCAFT00000084327.1:exon8:c.C1315A:p.L439I,CPQ:ENSCAFT00000087612.1:exon8:c.C1525A:p.L509I	SRP159481	Mammary Tumor
SRR7780911-SRR7780910	chr4	69989865	69989865	A	T	RICTOR	Missense_Mutation	ENSCAFT00000071376.1	exon24	c.A2319T	p.R773S	SNP	exonic	RICTOR		nonsynonymous SNV	RICTOR:ENSCAFT00000071376.1:exon24:c.A2319T:p.R773S,RICTOR:ENSCAFT00000029593.4:exon25:c.A2511T:p.R837S,RICTOR:ENSCAFT00000029595.5:exon25:c.A2511T:p.R837S	SRP159481	Mammary Tumor
SRR7780913-SRR7780912	chr15	55738518	55738518	T	A	RXFP1	Missense_Mutation	ENSCAFT00000013759.3	exon12	c.T815A	p.F272Y	SNP	exonic	RXFP1		nonsynonymous SNV	RXFP1:ENSCAFT00000013759.3:exon12:c.T815A:p.F272Y,RXFP1:ENSCAFT00000060556.1:exon12:c.T755A:p.F252Y,RXFP1:ENSCAFT00000064240.1:exon12:c.T743A:p.F248Y,RXFP1:ENSCAFT00000085072.1:exon12:c.T815A:p.F272Y,RXFP1:ENSCAFT00000037502.4:exon13:c.T893A:p.F298Y	SRP159481	Mammary Tumor
SRR7780913-SRR7780912	chr16	23712625	23712625	A	G	KAT6A	Missense_Mutation	ENSCAFT00000077268.1	exon16	c.A3850G	p.M1284V	SNP	exonic	KAT6A		nonsynonymous SNV	KAT6A:ENSCAFT00000077268.1:exon16:c.A3850G:p.M1284V,KAT6A:ENSCAFT00000073210.1:exon17:c.A4396G:p.M1466V,KAT6A:ENSCAFT00000009115.5:exon18:c.A4402G:p.M1468V	SRP159481	Mammary Tumor
SRR7780913-SRR7780912	chr5	36051695	36051695	T	C	DNAH9	Missense_Mutation	ENSCAFT00000074330.1	exon68	c.T13000C	p.C4334R	SNP	exonic	DNAH9		nonsynonymous SNV	DNAH9:ENSCAFT00000074330.1:exon68:c.T13000C:p.C4334R,DNAH9:ENSCAFT00000028231.4:exon69:c.T13228C:p.C4410R	SRP159481	Mammary Tumor
SRR7780915-SRR7780914	chr1	114808905	114808905	T	G	SIPA1L3	Missense_Mutation	ENSCAFT00000009650.6	exon14	c.A4040C	p.K1347T	SNP	exonic	SIPA1L3		nonsynonymous SNV	SIPA1L3:ENSCAFT00000009650.6:exon14:c.A4040C:p.K1347T	SRP159481	Mammary Tumor
SRR7780915-SRR7780914	chr11	45675236	45675236	T	A	C11H9orf72	Missense_Mutation	ENSCAFT00000002695.3	exon6	c.A687T	p.Q229H	SNP	exonic	C11H9orf72		nonsynonymous SNV	C11H9orf72:ENSCAFT00000002695.3:exon6:c.A687T:p.Q229H	SRP159481	Mammary Tumor
SRR7780915-SRR7780914	chr12	24322024	24322024	C	A	ZNF451	Missense_Mutation	ENSCAFT00000065226.1	exon8	c.C1309A	p.L437I	SNP	exonic	ZNF451		nonsynonymous SNV	ZNF451:ENSCAFT00000065226.1:exon8:c.C1309A:p.L437I,ZNF451:ENSCAFT00000067070.1:exon9:c.C1114A:p.L372I,ZNF451:ENSCAFT00000089674.1:exon9:c.C1072A:p.L358I,ZNF451:ENSCAFT00000003866.4:exon10:c.C1198A:p.L400I,ZNF451:ENSCAFT00000069139.1:exon10:c.C1198A:p.L400I,ZNF451:ENSCAFT00000069960.1:exon10:c.C1198A:p.L400I	SRP159481	Mammary Tumor
SRR7780915-SRR7780914	chr16	27447502	27447502	C	A	ADRB3	Missense_Mutation	ENSCAFT00000009965.3	exon2	c.C1199A	p.A400D	SNP	exonic	ADRB3		nonsynonymous SNV	ADRB3:ENSCAFT00000009965.3:exon2:c.C1199A:p.A400D	SRP159481	Mammary Tumor
SRR7780915-SRR7780914	chr25	18758873	18758873	C	T	ATP12A	Missense_Mutation	ENSCAFT00000048137.3	exon13	c.G2063A	p.R688Q	SNP	exonic	ATP12A		nonsynonymous SNV	ATP12A:ENSCAFT00000048137.3:exon13:c.G2063A:p.R688Q,ATP12A:ENSCAFT00000011912.4:exon14:c.G2267A:p.R756Q	SRP159481	Mammary Tumor
SRR7780915-SRR7780914	chr4	9788134	9788134	C	A	NUP133	Missense_Mutation	ENSCAFT00000019327.4	exon16	c.C2153A	p.S718Y	SNP	exonic	NUP133		nonsynonymous SNV	NUP133:ENSCAFT00000019327.4:exon16:c.C2153A:p.S718Y	SRP159481	Mammary Tumor
SRR7780915-SRR7780914	chr5	32357348	32357348	C	T	SPEM2	Missense_Mutation	ENSCAFT00000025841.4	exon1	c.C13T	p.L5F	SNP	exonic	SPEM2		nonsynonymous SNV	SPEM2:ENSCAFT00000025841.4:exon1:c.C13T:p.L5F	SRP159481	Mammary Tumor
SRR7780915-SRR7780914	chr5	68203124	68203124	C	A	DNAAF1	Missense_Mutation	ENSCAFT00000031771.4	exon2	c.G213T	p.R71S	SNP	exonic	DNAAF1		nonsynonymous SNV	DNAAF1:ENSCAFT00000031771.4:exon2:c.G213T:p.R71S	SRP159481	Mammary Tumor
SRR7780915-SRR7780914	chr9	25233332	25233332	G	A	IGF2BP1	Missense_Mutation	ENSCAFT00000072200.1	exon6	c.G452A	p.R151H	SNP	exonic	IGF2BP1		nonsynonymous SNV	IGF2BP1:ENSCAFT00000072200.1:exon6:c.G452A:p.R151H,IGF2BP1:ENSCAFT00000026763.4:exon8:c.G869A:p.R290H	SRP159481	Mammary Tumor
SRR7780915-SRR7780914	chr9	48222821	48222821	C	T	PNPLA7	Missense_Mutation	ENSCAFT00000030881.4	exon2	c.C341T	p.T114M	SNP	exonic	PNPLA7		nonsynonymous SNV	PNPLA7:ENSCAFT00000030881.4:exon2:c.C341T:p.T114M	SRP159481	Mammary Tumor
SRR7780917-SRR7780916	chr10	11550883	11550883	G	T	FRS2	Missense_Mutation	ENSCAFT00000000681.4	exon6	c.G1283T	p.S428I	SNP	exonic	FRS2		nonsynonymous SNV	FRS2:ENSCAFT00000000681.4:exon6:c.G1283T:p.S428I	SRP159481	Mammary Tumor
SRR7780917-SRR7780916	chr18	6002248	6002248	G	T	EGFR	Missense_Mutation	ENSCAFT00000005575.4	exon11	c.G1121T	p.R374L	SNP	exonic	EGFR		nonsynonymous SNV	EGFR:ENSCAFT00000005575.4:exon11:c.G1121T:p.R374L,EGFR:ENSCAFT00000061399.1:exon11:c.G1121T:p.R374L	SRP159481	Mammary Tumor
SRR7780917-SRR7780916	chr2	24823359	24823359	C	T	USP6NL	Missense_Mutation	ENSCAFT00000007841.4	exon3	c.C110T	p.A37V	SNP	exonic	USP6NL		nonsynonymous SNV	USP6NL:ENSCAFT00000007841.4:exon3:c.C110T:p.A37V,USP6NL:ENSCAFT00000067371.1:exon3:c.C179T:p.A60V,USP6NL:ENSCAFT00000076615.1:exon3:c.C110T:p.A37V,USP6NL:ENSCAFT00000078971.1:exon3:c.C110T:p.A37V,USP6NL:ENSCAFT00000079503.1:exon3:c.C161T:p.A54V,USP6NL:ENSCAFT00000081372.1:exon4:c.C173T:p.A58V	SRP159481	Mammary Tumor
SRR7780917-SRR7780916	chr3	42026544	42026544	G	T	IGF1R	Missense_Mutation	ENSCAFT00000017295.4	exon3	c.G906T	p.E302D	SNP	exonic	IGF1R		nonsynonymous SNV	IGF1R:ENSCAFT00000017295.4:exon3:c.G906T:p.E302D,IGF1R:ENSCAFT00000066568.1:exon3:c.G837T:p.E279D,IGF1R:ENSCAFT00000074523.1:exon3:c.G906T:p.E302D	SRP159481	Mammary Tumor
SRR7780917-SRR7780916	chr5	32563077	32563077	C	T	TP53	Missense_Mutation	ENSCAFT00000086831.1	exon6	c.G691A	p.G231R	SNP	exonic	TP53		nonsynonymous SNV	TP53:ENSCAFT00000086831.1:exon6:c.G691A:p.G231R,TP53:ENSCAFT00000026465.4:exon8:c.G760A:p.G254R,TP53:ENSCAFT00000081814.1:exon8:c.G952A:p.G318R	SRP159481	Mammary Tumor
SRR7780917-SRR7780916	chr5	57806553	57806553	G	T	PRDM16	Missense_Mutation	ENSCAFT00000047721.3	exon2	c.G49T	p.A17S	SNP	exonic	PRDM16		nonsynonymous SNV	PRDM16:ENSCAFT00000047721.3:exon2:c.G49T:p.A17S	SRP159481	Mammary Tumor
SRR7780920-SRR7780921	chr12	37537380	37537380	T	C	IMPG1	Missense_Mutation	ENSCAFT00000063825.1	exon12	c.A1117G	p.S373G	SNP	exonic	IMPG1		nonsynonymous SNV	IMPG1:ENSCAFT00000063825.1:exon12:c.A1117G:p.S373G,IMPG1:ENSCAFT00000004425.4:exon13:c.A1351G:p.S451G	SRP159481	Mammary Tumor
SRR7780920-SRR7780921	chr18	22518356	22518356	G	A	PCLO	Missense_Mutation	ENSCAFT00000010157.4	exon5	c.C4556T	p.A1519V	SNP	exonic	PCLO		nonsynonymous SNV	PCLO:ENSCAFT00000010157.4:exon5:c.C4556T:p.A1519V,PCLO:ENSCAFT00000073667.1:exon5:c.C4556T:p.A1519V	SRP159481	Mammary Tumor
SRR7780920-SRR7780921	chr2	24349755	24349755	C	A	DHTKD1	Missense_Mutation	ENSCAFT00000007779.4	exon1	c.G10T	p.A4S	SNP	exonic	DHTKD1		nonsynonymous SNV	DHTKD1:ENSCAFT00000007779.4:exon1:c.G10T:p.A4S,DHTKD1:ENSCAFT00000081338.1:exon1:c.G10T:p.A4S,DHTKD1:ENSCAFT00000085606.1:exon1:c.G10T:p.A4S	SRP159481	Mammary Tumor
SRR7780920-SRR7780921	chr24	30238620	30238620	T	A	PTPRT	Missense_Mutation	ENSCAFT00000014754.5	exon10	c.A1677T	p.K559N	SNP	exonic	PTPRT		nonsynonymous SNV	PTPRT:ENSCAFT00000014754.5:exon10:c.A1677T:p.K559N,PTPRT:ENSCAFT00000014751.5:exon12:c.A2115T:p.K705N,PTPRT:ENSCAFT00000014756.4:exon12:c.A2115T:p.K705N,PTPRT:ENSCAFT00000068588.1:exon12:c.A2115T:p.K705N,PTPRT:ENSCAFT00000071641.1:exon12:c.A2115T:p.K705N	SRP159481	Mammary Tumor
SRR7780920-SRR7780921	chr27	2321891	2321891	C	T	KRT3	Missense_Mutation	ENSCAFT00000011544.4	exon2	c.C607T	p.R203W	SNP	exonic	KRT3		nonsynonymous SNV	KRT3:ENSCAFT00000011544.4:exon2:c.C607T:p.R203W,KRT3:ENSCAFT00000011548.4:exon2:c.C616T:p.R206W,KRT3:ENSCAFT00000011567.3:exon2:c.C790T:p.R264W,KRT3:ENSCAFT00000011579.4:exon2:c.C790T:p.R264W,KRT3:ENSCAFT00000011634.4:exon2:c.C790T:p.R264W,KRT3:ENSCAFT00000087882.1:exon2:c.C790T:p.R264W,KRT3:ENSCAFT00000039433.3:exon3:c.C229T:p.R77W	SRP159481	Mammary Tumor
SRR7780920-SRR7780921	chr28	25620010	25620010	C	G	FAM160B1	Missense_Mutation	ENSCAFT00000018503.3	exon10	c.C1210G	p.R404G	SNP	exonic	FAM160B1		nonsynonymous SNV	FAM160B1:ENSCAFT00000018503.3:exon10:c.C1210G:p.R404G	SRP159481	Mammary Tumor
SRR7780920-SRR7780921	chr3	55048363	55048363	C	T	BNC1	Missense_Mutation	ENSCAFT00000020969.3	exon4	c.G1129A	p.A377T	SNP	exonic	BNC1		nonsynonymous SNV	BNC1:ENSCAFT00000020969.3:exon4:c.G1129A:p.A377T,BNC1:ENSCAFT00000061527.1:exon4:c.G1129A:p.A377T,BNC1:ENSCAFT00000076831.1:exon4:c.G1129A:p.A377T,BNC1:ENSCAFT00000084796.1:exon4:c.G1198A:p.A400T	SRP159481	Mammary Tumor
SRR7780920-SRR7780921	chr34	12660730	12660730	T	C	PIK3CA	Missense_Mutation	ENSCAFT00000080543.1	exon7	c.T1258C	p.C420R	SNP	exonic	PIK3CA		nonsynonymous SNV	PIK3CA:ENSCAFT00000080543.1:exon7:c.T1258C:p.C420R,PIK3CA:ENSCAFT00000017863.4:exon8:c.T1258C:p.C420R	SRP159481	Mammary Tumor
SRR7780920-SRR7780921	chr34	36899644	36899644	C	T	ECT2	Missense_Mutation	ENSCAFT00000024536.4	exon1	c.C74T	p.T25M	SNP	exonic	ECT2		nonsynonymous SNV	ECT2:ENSCAFT00000024536.4:exon1:c.C74T:p.T25M,ECT2:ENSCAFT00000059544.1:exon1:c.C74T:p.T25M,ECT2:ENSCAFT00000049237.3:exon2:c.C41T:p.T14M,ECT2:ENSCAFT00000070837.1:exon2:c.C41T:p.T14M,ECT2:ENSCAFT00000083215.1:exon2:c.C89T:p.T30M	SRP159481	Mammary Tumor
SRR7780920-SRR7780921	chr4	83050039	83050039	C	T	CDH12	Missense_Mutation	ENSCAFT00000035717.3	exon3	c.C653T	p.T218I	SNP	exonic	CDH12		nonsynonymous SNV	CDH12:ENSCAFT00000035717.3:exon3:c.C653T:p.T218I,CDH12:ENSCAFT00000030227.5:exon4:c.C773T:p.T258I	SRP159481	Mammary Tumor
SRR7780920-SRR7780921	chr5	32563700	32563700	G	C	TP53	Missense_Mutation	ENSCAFT00000086831.1	exon4	c.C551G	p.P184R	SNP	exonic	TP53		nonsynonymous SNV	TP53:ENSCAFT00000086831.1:exon4:c.C551G:p.P184R,TP53:ENSCAFT00000026465.4:exon6:c.C620G:p.P207R,TP53:ENSCAFT00000081814.1:exon6:c.C812G:p.P271R	SRP159481	Mammary Tumor
SRR7780920-SRR7780921	chr5	63601087	63601087	G	A	GAS8	Missense_Mutation	ENSCAFT00000031497.4	exon6	c.C427T	p.R143W	SNP	exonic	GAS8		nonsynonymous SNV	GAS8:ENSCAFT00000031497.4:exon6:c.C427T:p.R143W,GAS8:ENSCAFT00000043843.3:exon6:c.C427T:p.R143W	SRP159481	Mammary Tumor
SRR7780920-SRR7780921	chr5	77813439	77813439	C	T	DHX38	Missense_Mutation	ENSCAFT00000032225.4	exon2	c.C31T	p.H11Y	SNP	exonic	DHX38		nonsynonymous SNV	DHX38:ENSCAFT00000032225.4:exon2:c.C31T:p.H11Y,DHX38:ENSCAFT00000062056.1:exon2:c.C31T:p.H11Y,DHX38:ENSCAFT00000068969.1:exon2:c.C31T:p.H11Y,DHX38:ENSCAFT00000073744.1:exon2:c.C31T:p.H11Y	SRP159481	Mammary Tumor
SRR7780920-SRR7780921	chr7	5616158	5616158	G	A	ASPM	Missense_Mutation	ENSCAFT00000018114.4	exon8	c.G2576A	p.R859K	SNP	exonic	ASPM		nonsynonymous SNV	ASPM:ENSCAFT00000018114.4:exon8:c.G2576A:p.R859K	SRP159481	Mammary Tumor
SRR7780920-SRR7780921	chr8	72480651	72480651	G	A	GPR132	Missense_Mutation	ENSCAFT00000048786.2	exon4	c.C391T	p.R131C	SNP	exonic	GPR132		nonsynonymous SNV	GPR132:ENSCAFT00000048786.2:exon4:c.C391T:p.R131C	SRP159481	Mammary Tumor
SRR7780920-SRR7780921	chr9	10869457	10869457	G	A	MRC2	Missense_Mutation	ENSCAFT00000078245.1	exon5	c.G340A	p.A114T	SNP	exonic	MRC2		nonsynonymous SNV	MRC2:ENSCAFT00000078245.1:exon5:c.G340A:p.A114T,MRC2:ENSCAFT00000047462.3:exon24:c.G4063A:p.A1355T,MRC2:ENSCAFT00000081269.1:exon24:c.G4063A:p.A1355T,MRC2:ENSCAFT00000021177.4:exon25:c.G3703A:p.A1235T,MRC2:ENSCAFT00000021197.5:exon25:c.G3703A:p.A1235T	SRP159481	Mammary Tumor
SRR7780924-SRR7780925	chr12	11402895	11402895	G	A	BICRAL	Missense_Mutation	ENSCAFT00000060242.1	exon4	c.G1135A	p.V379I	SNP	exonic	BICRAL		nonsynonymous SNV	BICRAL:ENSCAFT00000060242.1:exon4:c.G1135A:p.V379I,BICRAL:ENSCAFT00000002701.4:exon5:c.G1204A:p.V402I,BICRAL:ENSCAFT00000063934.1:exon5:c.G1204A:p.V402I	SRP159481	Mammary Tumor
SRR7780924-SRR7780925	chr15	17790312	17790312	G	T	OSGEP	Missense_Mutation	ENSCAFT00000008709.4	exon7	c.C917A	p.A306E	SNP	exonic	OSGEP		nonsynonymous SNV	OSGEP:ENSCAFT00000008709.4:exon7:c.C917A:p.A306E	SRP159481	Mammary Tumor
SRR7780924-SRR7780925	chr18	38801457	38801457	G	A	P2RX3	Missense_Mutation	ENSCAFT00000071375.1	exon1	c.C284T	p.A95V	SNP	exonic	P2RX3		nonsynonymous SNV	P2RX3:ENSCAFT00000071375.1:exon1:c.C284T:p.A95V	SRP159481	Mammary Tumor
SRR7780924-SRR7780925	chr2	35827028	35827028	G	A	DND1	Missense_Mutation	ENSCAFT00000009495.2	exon3	c.C292T	p.R98C	SNP	exonic	DND1		nonsynonymous SNV	DND1:ENSCAFT00000009495.2:exon3:c.C292T:p.R98C	SRP159481	Mammary Tumor
SRR7780924-SRR7780925	chr2	79707994	79707994	G	A	ALDH4A1	Missense_Mutation	ENSCAFT00000045210.2	exon12	c.G1199A	p.R400H	SNP	exonic	ALDH4A1		nonsynonymous SNV	ALDH4A1:ENSCAFT00000045210.2:exon12:c.G1199A:p.R400H	SRP159481	Mammary Tumor
SRR7780924-SRR7780925	chr22	15700208	15700208	G	T	DIAPH3	Missense_Mutation	ENSCAFT00000007901.4	exon25	c.C3038A	p.T1013K	SNP	exonic	DIAPH3		nonsynonymous SNV	DIAPH3:ENSCAFT00000007901.4:exon25:c.C3038A:p.T1013K,DIAPH3:ENSCAFT00000079181.1:exon25:c.C3101A:p.T1034K,DIAPH3:ENSCAFT00000007906.5:exon26:c.C3206A:p.T1069K,DIAPH3:ENSCAFT00000045223.3:exon27:c.C3239A:p.T1080K	SRP159481	Mammary Tumor
SRR7780924-SRR7780925	chr24	17815760	17815760	T	C	ATRN	Missense_Mutation	ENSCAFT00000010258.4	exon3	c.A488G	p.N163S	SNP	exonic	ATRN		nonsynonymous SNV	ATRN:ENSCAFT00000010258.4:exon3:c.A488G:p.N163S,ATRN:ENSCAFT00000093702.1:exon3:c.A488G:p.N163S	SRP159481	Mammary Tumor
SRR7780924-SRR7780925	chr24	42293605	42293605	G	T	BMP7	Missense_Mutation	ENSCAFT00000019076.4	exon1	c.C1049A	p.T350N	SNP	exonic	BMP7		nonsynonymous SNV	BMP7:ENSCAFT00000019076.4:exon1:c.C1049A:p.T350N,BMP7:ENSCAFT00000047209.3:exon1:c.C1049A:p.T350N,BMP7:ENSCAFT00000087492.1:exon1:c.C1049A:p.T350N,BMP7:ENSCAFT00000090354.1:exon1:c.C1049A:p.T350N	SRP159481	Mammary Tumor
SRR7780924-SRR7780925	chr25	50108600	50108600	C	A	OR9S19	Missense_Mutation	ENSCAFT00000081133.1	exon1	c.C354A	p.F118L	SNP	exonic	OR9S19		nonsynonymous SNV	OR9S19:ENSCAFT00000081133.1:exon1:c.C354A:p.F118L	SRP159481	Mammary Tumor
SRR7780924-SRR7780925	chr25	50108662	50108662	T	G	OR9S19	Missense_Mutation	ENSCAFT00000081133.1	exon1	c.T416G	p.I139S	SNP	exonic	OR9S19		nonsynonymous SNV	OR9S19:ENSCAFT00000081133.1:exon1:c.T416G:p.I139S	SRP159481	Mammary Tumor
SRR7780924-SRR7780925	chr34	279258	279258	C	T	TRIO	Missense_Mutation	ENSCAFT00000063384.1	exon9	c.G895A	p.A299T	SNP	exonic	TRIO		nonsynonymous SNV	TRIO:ENSCAFT00000063384.1:exon9:c.G895A:p.A299T,TRIO:ENSCAFT00000061912.1:exon52:c.G8029A:p.A2677T,TRIO:ENSCAFT00000072989.1:exon52:c.G8137A:p.A2713T,TRIO:ENSCAFT00000092549.1:exon52:c.G8140A:p.A2714T,TRIO:ENSCAFT00000014689.5:exon53:c.G8260A:p.A2754T,TRIO:ENSCAFT00000060874.1:exon53:c.G8260A:p.A2754T	SRP159481	Mammary Tumor
SRR7780924-SRR7780925	chr5	16776229	16776229	C	A	APOA5	Missense_Mutation	ENSCAFT00000021156.4	exon4	c.C574A	p.L192I	SNP	exonic	APOA5		nonsynonymous SNV	APOA5:ENSCAFT00000021156.4:exon4:c.C574A:p.L192I	SRP159481	Mammary Tumor
SRR7780924-SRR7780925	chr5	43517003	43517003	G	T	SLC35D1	Missense_Mutation	ENSCAFT00000049817.2	exon12	c.G964T	p.A322S	SNP	exonic	SLC35D1		nonsynonymous SNV	SLC35D1:ENSCAFT00000049817.2:exon12:c.G964T:p.A322S,SLC35D1:ENSCAFT00000068707.1:exon12:c.G964T:p.A322S	SRP159481	Mammary Tumor
SRR7780924-SRR7780925	chr6	8725029	8725029	T	C	SERPINE1	Missense_Mutation	ENSCAFT00000022067.4	exon2	c.A623G	p.D208G	SNP	exonic	SERPINE1		nonsynonymous SNV	SERPINE1:ENSCAFT00000022067.4:exon2:c.A623G:p.D208G	SRP159481	Mammary Tumor
SRR7780924-SRR7780925	chr8	48669583	48669583	G	A	TTLL5	Missense_Mutation	ENSCAFT00000027060.4	exon4	c.G233A	p.R78H	SNP	exonic	TTLL5		nonsynonymous SNV	TTLL5:ENSCAFT00000027060.4:exon4:c.G233A:p.R78H,TTLL5:ENSCAFT00000027063.5:exon4:c.G233A:p.R78H,TTLL5:ENSCAFT00000027064.5:exon4:c.G233A:p.R78H,TTLL5:ENSCAFT00000060615.1:exon4:c.G233A:p.R78H,TTLL5:ENSCAFT00000081002.1:exon4:c.G233A:p.R78H,TTLL5:ENSCAFT00000084289.1:exon4:c.G233A:p.R78H,TTLL5:ENSCAFT00000092414.1:exon4:c.G233A:p.R78H,TTLL5:ENSCAFT00000092535.1:exon4:c.G233A:p.R78H	SRP159481	Mammary Tumor
SRR7780926-SRR7780927	chr1	113832305	113832305	G	T	PAF1	Missense_Mutation	ENSCAFT00000069459.1	exon13	c.G1375T	p.V459L	SNP	exonic	PAF1		nonsynonymous SNV	PAF1:ENSCAFT00000069459.1:exon13:c.G1375T:p.V459L,PAF1:ENSCAFT00000008953.5:exon14:c.G1298T:p.G433V	SRP159481	Mammary Tumor
SRR7780926-SRR7780927	chr10	26409524	26409524	C	T	CSNK1E	Missense_Mutation	ENSCAFT00000002187.5	exon7	c.C1049T	p.S350F	SNP	exonic	CSNK1E		nonsynonymous SNV	CSNK1E:ENSCAFT00000002187.5:exon7:c.C1049T:p.S350F	SRP159481	Mammary Tumor
SRR7780926-SRR7780927	chr13	23007666	23007666	T	A	SQLE	Missense_Mutation	ENSCAFT00000038326.3	exon6	c.T936A	p.N312K	SNP	exonic	SQLE		nonsynonymous SNV	SQLE:ENSCAFT00000038326.3:exon6:c.T936A:p.N312K,SQLE:ENSCAFT00000062899.1:exon6:c.T651A:p.N217K	SRP159481	Mammary Tumor
SRR7780926-SRR7780927	chr14	26544732	26544732	G	A	THSD7A	Missense_Mutation	ENSCAFT00000039001.3	exon3	c.C1180T	p.P394S	SNP	exonic	THSD7A		nonsynonymous SNV	THSD7A:ENSCAFT00000039001.3:exon3:c.C1180T:p.P394S	SRP159481	Mammary Tumor
SRR7780926-SRR7780927	chr17	26624714	26624714	C	A	RASGRP3	Missense_Mutation	ENSCAFT00000084238.1	exon6	c.C342A	p.H114Q	SNP	exonic	RASGRP3		nonsynonymous SNV	RASGRP3:ENSCAFT00000084238.1:exon6:c.C342A:p.H114Q	SRP159481	Mammary Tumor
SRR7780926-SRR7780927	chr20	33007444	33007444	A	T	DNAH12	Missense_Mutation	ENSCAFT00000047961.3	exon40	c.A6494T	p.K2165I	SNP	exonic	DNAH12		nonsynonymous SNV	DNAH12:ENSCAFT00000047961.3:exon40:c.A6494T:p.K2165I	SRP159481	Mammary Tumor
SRR7780926-SRR7780927	chr21	28241950	28241950	C	A	OR51B18	Missense_Mutation	ENSCAFT00000075610.1	exon1	c.G689T	p.R230I	SNP	exonic	OR51B18		nonsynonymous SNV	OR51B18:ENSCAFT00000075610.1:exon1:c.G689T:p.R230I	SRP159481	Mammary Tumor
SRR7780926-SRR7780927	chr28	38495363	38495363	G	A	EBF3	Missense_Mutation	ENSCAFT00000073469.1	exon1	c.C662T	p.P221L	SNP	exonic	EBF3		nonsynonymous SNV	EBF3:ENSCAFT00000073469.1:exon1:c.C662T:p.P221L,EBF3:ENSCAFT00000072495.1:exon9:c.C881T:p.P294L	SRP159481	Mammary Tumor
SRR7780926-SRR7780927	chr6	57773069	57773069	G	A	ZNF644	Missense_Mutation	ENSCAFT00000032162.4	exon4	c.G1114A	p.E372K	SNP	exonic	ZNF644		nonsynonymous SNV	ZNF644:ENSCAFT00000032162.4:exon4:c.G1114A:p.E372K,ZNF644:ENSCAFT00000085494.1:exon4:c.G1114A:p.E372K,ZNF644:ENSCAFT00000088219.1:exon4:c.G1114A:p.E372K	SRP159481	Mammary Tumor
SRR7780926-SRR7780927	chr7	134322	134322	C	T	PPFIA4	Missense_Mutation	ENSCAFT00000068834.1	exon19	c.G2548A	p.A850T	SNP	exonic	PPFIA4		nonsynonymous SNV	PPFIA4:ENSCAFT00000068834.1:exon19:c.G2548A:p.A850T,PPFIA4:ENSCAFT00000016404.4:exon21:c.G2749A:p.A917T,PPFIA4:ENSCAFT00000049037.3:exon21:c.G2749A:p.A917T,PPFIA4:ENSCAFT00000062386.1:exon21:c.G2686A:p.A896T,PPFIA4:ENSCAFT00000078508.1:exon22:c.G2749A:p.A917T,PPFIA4:ENSCAFT00000080460.1:exon22:c.G2749A:p.A917T	SRP159481	Mammary Tumor
SRR7780926-SRR7780927	chr9	49010207	49010207	T	G	NOTCH1	Missense_Mutation	ENSCAFT00000031242.5	exon26	c.T4730G	p.L1577R	SNP	exonic	NOTCH1		nonsynonymous SNV	NOTCH1:ENSCAFT00000031242.5:exon26:c.T4730G:p.L1577R	SRP159481	Mammary Tumor
SRR7780931-SRR7780930	chr18	5994491	5994491	G	T	EGFR	Missense_Mutation	ENSCAFT00000005575.4	exon6	c.G550T	p.A184S	SNP	exonic	EGFR		nonsynonymous SNV	EGFR:ENSCAFT00000005575.4:exon6:c.G550T:p.A184S,EGFR:ENSCAFT00000061399.1:exon6:c.G550T:p.A184S	SRP159481	Mammary Tumor
SRR7780931-SRR7780930	chr20	5013655	5013655	G	T	FGD5	Missense_Mutation	ENSCAFT00000047548.2	exon13	c.G3681T	p.K1227N	SNP	exonic	FGD5		nonsynonymous SNV	FGD5:ENSCAFT00000047548.2:exon13:c.G3681T:p.K1227N,FGD5:ENSCAFT00000007289.5:exon14:c.G3699T:p.K1233N,FGD5:ENSCAFT00000069641.1:exon15:c.G3771T:p.K1257N,FGD5:ENSCAFT00000080012.1:exon15:c.G3771T:p.K1257N,FGD5:ENSCAFT00000080066.1:exon15:c.G3618T:p.K1206N,FGD5:ENSCAFT00000072759.1:exon16:c.G3702T:p.K1234N	SRP159481	Mammary Tumor
SRR7780931-SRR7780930	chr28	39557645	39557645	G	A	TCERG1L	Missense_Mutation	ENSCAFT00000017279.5	exon4	c.C800T	p.T267M	SNP	exonic	TCERG1L		nonsynonymous SNV	TCERG1L:ENSCAFT00000017279.5:exon4:c.C800T:p.T267M	SRP159481	Mammary Tumor
SRR7780931-SRR7780930	chr34	32255579	32255579	T	G	ZBBX	Missense_Mutation	ENSCAFT00000067317.1	exon4	c.A128C	p.K43T	SNP	exonic	ZBBX		nonsynonymous SNV	ZBBX:ENSCAFT00000067317.1:exon4:c.A128C:p.K43T,ZBBX:ENSCAFT00000023060.4:exon6:c.A479C:p.K160T,ZBBX:ENSCAFT00000046161.3:exon6:c.A479C:p.K160T,ZBBX:ENSCAFT00000064672.1:exon6:c.A479C:p.K160T	SRP159481	Mammary Tumor
SRR7780931-SRR7780930	chr7	9479828	9479828	C	T	KCNH1	Missense_Mutation	ENSCAFT00000019169.5	exon7	c.G1088A	p.R363Q	SNP	exonic	KCNH1		nonsynonymous SNV	KCNH1:ENSCAFT00000019169.5:exon7:c.G1088A:p.R363Q	SRP159481	Mammary Tumor
SRR7780933-SRR7780932	chr1	100642464	100642464	C	T	ZNF772	Missense_Mutation	ENSCAFT00000011500.4	exon4	c.C677T	p.A226V	SNP	exonic	ZNF772		nonsynonymous SNV	ZNF772:ENSCAFT00000011500.4:exon4:c.C677T:p.A226V,ZNF772:ENSCAFT00000046530.2:exon5:c.C785T:p.A262V	SRP159481	Mammary Tumor
SRR7780933-SRR7780932	chr10	1395493	1395493	G	C	R3HDM2	Missense_Mutation	ENSCAFT00000080045.1	exon12	c.C1385G	p.S462C	SNP	exonic	R3HDM2		nonsynonymous SNV	R3HDM2:ENSCAFT00000080045.1:exon12:c.C1385G:p.S462C,R3HDM2:ENSCAFT00000000323.4:exon14:c.C1427G:p.S476C,R3HDM2:ENSCAFT00000000344.4:exon14:c.C1385G:p.S462C,R3HDM2:ENSCAFT00000073995.1:exon14:c.C1427G:p.S476C,R3HDM2:ENSCAFT00000078379.1:exon14:c.C1421G:p.S474C,R3HDM2:ENSCAFT00000048795.3:exon15:c.C1481G:p.S494C,R3HDM2:ENSCAFT00000069949.1:exon15:c.C1481G:p.S494C	SRP159481	Mammary Tumor
SRR7780933-SRR7780932	chr10	46057801	46057801	T	C	THADA	Missense_Mutation	ENSCAFT00000077079.1	exon9	c.A1748G	p.Q583R	SNP	exonic	THADA		nonsynonymous SNV	THADA:ENSCAFT00000077079.1:exon9:c.A1748G:p.Q583R,THADA:ENSCAFT00000083885.1:exon11:c.A1988G:p.Q663R,THADA:ENSCAFT00000003884.4:exon12:c.A1979G:p.Q660R,THADA:ENSCAFT00000088920.1:exon12:c.A1979G:p.Q660R,THADA:ENSCAFT00000092951.1:exon12:c.A1979G:p.Q660R	SRP159481	Mammary Tumor
SRR7780933-SRR7780932	chr11	2056234	2056234	G	A	HNRNPH1	Missense_Mutation	ENSCAFT00000000520.4	exon7	c.G772A	p.D258N	SNP	exonic	HNRNPH1		nonsynonymous SNV	HNRNPH1:ENSCAFT00000000520.4:exon7:c.G772A:p.D258N,HNRNPH1:ENSCAFT00000087826.1:exon7:c.G772A:p.D258N,HNRNPH1:ENSCAFT00000091448.1:exon7:c.G772A:p.D258N	SRP159481	Mammary Tumor
SRR7780933-SRR7780932	chr11	24124255	24124255	C	T	TRPC7	Missense_Mutation	ENSCAFT00000073028.1	exon7	c.G1724A	p.R575Q	SNP	exonic	TRPC7		nonsynonymous SNV	TRPC7:ENSCAFT00000073028.1:exon7:c.G1724A:p.R575Q,TRPC7:ENSCAFT00000070299.1:exon8:c.G1889A:p.R630Q,TRPC7:ENSCAFT00000072285.1:exon8:c.G1907A:p.R636Q,TRPC7:ENSCAFT00000001686.4:exon9:c.G2072A:p.R691Q	SRP159481	Mammary Tumor
SRR7780933-SRR7780932	chr11	25341263	25341263	C	T	KLHL3	Missense_Mutation	ENSCAFT00000001724.3	exon13	c.G1457A	p.G486E	SNP	exonic	KLHL3		nonsynonymous SNV	KLHL3:ENSCAFT00000001724.3:exon13:c.G1457A:p.G486E,KLHL3:ENSCAFT00000001726.5:exon13:c.G1460A:p.G487E	SRP159481	Mammary Tumor
SRR7780933-SRR7780932	chr11	64099513	64099513	G	T	ABITRAM	Missense_Mutation	ENSCAFT00000049787.2	exon5	c.G387T	p.K129N	SNP	exonic	ABITRAM		nonsynonymous SNV	ABITRAM:ENSCAFT00000049787.2:exon5:c.G387T:p.K129N	SRP159481	Mammary Tumor
SRR7780933-SRR7780932	chr15	5524786	5524786	C	T	GRIK3	Missense_Mutation	ENSCAFT00000005371.4	exon11	c.C1610T	p.T537M	SNP	exonic	GRIK3		nonsynonymous SNV	GRIK3:ENSCAFT00000005371.4:exon11:c.C1610T:p.T537M,GRIK3:ENSCAFT00000048003.3:exon11:c.C1610T:p.T537M	SRP159481	Mammary Tumor
SRR7780933-SRR7780932	chr15	17350572	17350572	A	G	OR4Q3	Missense_Mutation	ENSCAFT00000036689.3	exon2	c.T488C	p.I163T	SNP	exonic	OR4Q3		nonsynonymous SNV	OR4Q3:ENSCAFT00000036689.3:exon2:c.T488C:p.I163T	SRP159481	Mammary Tumor
SRR7780933-SRR7780932	chr17	63897970	63897970	C	A	ADORA3	Missense_Mutation	ENSCAFT00000036183.3	exon2	c.C725A	p.S242Y	SNP	exonic	ADORA3		nonsynonymous SNV	ADORA3:ENSCAFT00000036183.3:exon2:c.C725A:p.S242Y	SRP159481	Mammary Tumor
SRR7780933-SRR7780932	chr18	12665318	12665318	G	A	LAMB1	Missense_Mutation	ENSCAFT00000006148.4	exon13	c.G1532A	p.R511H	SNP	exonic	LAMB1		nonsynonymous SNV	LAMB1:ENSCAFT00000006148.4:exon13:c.G1532A:p.R511H,LAMB1:ENSCAFT00000087385.1:exon16:c.G1865A:p.R622H	SRP159481	Mammary Tumor
SRR7780933-SRR7780932	chr2	30102577	30102577	T	C	ANKRD16	Missense_Mutation	ENSCAFT00000008421.4	exon5	c.T695C	p.V232A	SNP	exonic	ANKRD16		nonsynonymous SNV	ANKRD16:ENSCAFT00000008421.4:exon5:c.T695C:p.V232A,ANKRD16:ENSCAFT00000062578.1:exon5:c.T695C:p.V232A	SRP159481	Mammary Tumor
SRR7780933-SRR7780932	chr2	30530725	30530725	C	T	TUBAL3	Missense_Mutation	ENSCAFT00000008472.4	exon4	c.C593T	p.T198M	SNP	exonic	TUBAL3		nonsynonymous SNV	TUBAL3:ENSCAFT00000008472.4:exon4:c.C593T:p.T198M	SRP159481	Mammary Tumor
SRR7780933-SRR7780932	chr29	3289076	3289076	G	A	PXDNL	Missense_Mutation	ENSCAFT00000060776.1	exon19	c.C3833T	p.A1278V	SNP	exonic	PXDNL		nonsynonymous SNV	PXDNL:ENSCAFT00000060776.1:exon19:c.C3833T:p.A1278V,PXDNL:ENSCAFT00000063562.1:exon19:c.C3797T:p.A1266V,PXDNL:ENSCAFT00000082330.1:exon19:c.C3854T:p.A1285V,PXDNL:ENSCAFT00000090002.1:exon19:c.C3737T:p.A1246V,PXDNL:ENSCAFT00000010829.4:exon21:c.C4121T:p.A1374V	SRP159481	Mammary Tumor
SRR7780933-SRR7780932	chr29	27906230	27906230	T	C	ZNF704	Missense_Mutation	ENSCAFT00000066423.1	exon4	c.A1382G	p.Q461R	SNP	exonic	ZNF704		nonsynonymous SNV	ZNF704:ENSCAFT00000066423.1:exon4:c.A1382G:p.Q461R,ZNF704:ENSCAFT00000013380.5:exon7:c.A1094G:p.Q365R	SRP159481	Mammary Tumor
SRR7780933-SRR7780932	chr3	84909418	84909418	C	T	ANAPC4	Missense_Mutation	ENSCAFT00000026058.4	exon3	c.G335A	p.C112Y	SNP	exonic	ANAPC4		nonsynonymous SNV	ANAPC4:ENSCAFT00000026058.4:exon3:c.G335A:p.C112Y,ANAPC4:ENSCAFT00000047081.3:exon3:c.G335A:p.C112Y,ANAPC4:ENSCAFT00000063132.1:exon3:c.G335A:p.C112Y,ANAPC4:ENSCAFT00000065596.1:exon3:c.G335A:p.C112Y,ANAPC4:ENSCAFT00000072413.1:exon3:c.G335A:p.C112Y,ANAPC4:ENSCAFT00000074203.1:exon3:c.G335A:p.C112Y,ANAPC4:ENSCAFT00000082850.1:exon3:c.G335A:p.C112Y	SRP159481	Mammary Tumor
SRR7780933-SRR7780932	chr34	11321642	11321642	T	C	SLC6A18	Missense_Mutation	ENSCAFT00000016627.4	exon4	c.A520G	p.S174G	SNP	exonic	SLC6A18		nonsynonymous SNV	SLC6A18:ENSCAFT00000016627.4:exon4:c.A520G:p.S174G	SRP159481	Mammary Tumor
SRR7780933-SRR7780932	chr34	12675674	12675674	A	G	PIK3CA	Missense_Mutation	ENSCAFT00000080543.1	exon20	c.A3140G	p.H1047R	SNP	exonic	PIK3CA		nonsynonymous SNV	PIK3CA:ENSCAFT00000080543.1:exon20:c.A3140G:p.H1047R	SRP159481	Mammary Tumor
SRR7780933-SRR7780932	chr34	17732673	17732673	C	A	VPS8	Missense_Mutation	ENSCAFT00000020930.4	exon24	c.C2134A	p.L712I	SNP	exonic	VPS8		nonsynonymous SNV	VPS8:ENSCAFT00000020930.4:exon24:c.C2134A:p.L712I,VPS8:ENSCAFT00000044635.3:exon24:c.C2134A:p.L712I,VPS8:ENSCAFT00000076153.1:exon24:c.C2134A:p.L712I,VPS8:ENSCAFT00000084433.1:exon24:c.C2134A:p.L712I	SRP159481	Mammary Tumor
SRR7780933-SRR7780932	chr34	17732674	17732674	T	A	VPS8	Missense_Mutation	ENSCAFT00000020930.4	exon24	c.T2135A	p.L712Q	SNP	exonic	VPS8		nonsynonymous SNV	VPS8:ENSCAFT00000020930.4:exon24:c.T2135A:p.L712Q,VPS8:ENSCAFT00000044635.3:exon24:c.T2135A:p.L712Q,VPS8:ENSCAFT00000076153.1:exon24:c.T2135A:p.L712Q,VPS8:ENSCAFT00000084433.1:exon24:c.T2135A:p.L712Q	SRP159481	Mammary Tumor
SRR7780933-SRR7780932	chr5	14732189	14732189	T	C	HINFP	Missense_Mutation	ENSCAFT00000019441.4	exon10	c.A1507G	p.I503V	SNP	exonic	HINFP		nonsynonymous SNV	HINFP:ENSCAFT00000019441.4:exon10:c.A1507G:p.I503V	SRP159481	Mammary Tumor
SRR7780933-SRR7780932	chr5	30665914	30665914	G	A	SLC13A5	Missense_Mutation	ENSCAFT00000024424.4	exon7	c.G952A	p.A318T	SNP	exonic	SLC13A5		nonsynonymous SNV	SLC13A5:ENSCAFT00000024424.4:exon7:c.G952A:p.A318T,SLC13A5:ENSCAFT00000093463.1:exon7:c.G952A:p.A318T	SRP159481	Mammary Tumor
SRR7780933-SRR7780932	chr9	25612129	25612129	C	G	NGFR	Missense_Mutation	ENSCAFT00000049876.2	exon3	c.C354G	p.D118E	SNP	exonic	NGFR		nonsynonymous SNV	NGFR:ENSCAFT00000049876.2:exon3:c.C354G:p.D118E	SRP159481	Mammary Tumor
SRR7780933-SRR7780932	chr9	51213891	51213891	C	T	MRPS2	Missense_Mutation	ENSCAFT00000042898.2	exon2	c.C1513T	p.R505W	SNP	exonic	MRPS2		nonsynonymous SNV	MRPS2:ENSCAFT00000042898.2:exon2:c.C1513T:p.R505W,MRPS2:ENSCAFT00000062957.1:exon3:c.C940T:p.R314W,MRPS2:ENSCAFT00000068814.1:exon4:c.C847T:p.R283W	SRP159481	Mammary Tumor
SRR7780933-SRR7780932	chr14	18788370	18788370	G	T	VPS50	Missense_Mutation	ENSCAFT00000081687.1	exon10	c.G678T	p.E226D	SNP	exonic	VPS50		nonsynonymous SNV	VPS50:ENSCAFT00000081687.1:exon10:c.G678T:p.E226D,VPS50:ENSCAFT00000003203.4:exon12:c.G882T:p.E294D	SRP159481	Mammary Tumor
SRR7780939-SRR7780938	chr1	106027728	106027728	A	G	KLK1	Missense_Mutation	ENSCAFT00000080990.1	exon4	c.A946G	p.I316V	SNP	exonic	KLK1		nonsynonymous SNV	KLK1:ENSCAFT00000080990.1:exon4:c.A946G:p.I316V,KLK1:ENSCAFT00000088298.1:exon4:c.A880G:p.I294V,KLK1:ENSCAFT00000069681.1:exon5:c.A994G:p.I332V,KLK1:ENSCAFT00000079204.1:exon5:c.A994G:p.I332V	SRP159481	Mammary Tumor
SRR7780939-SRR7780938	chr34	12675674	12675674	A	G	PIK3CA	Missense_Mutation	ENSCAFT00000080543.1	exon20	c.A3140G	p.H1047R	SNP	exonic	PIK3CA		nonsynonymous SNV	PIK3CA:ENSCAFT00000080543.1:exon20:c.A3140G:p.H1047R	SRP159481	Mammary Tumor
SRR7780939-SRR7780938	chr5	16386429	16386429	C	G	PCSK7	Missense_Mutation	ENSCAFT00000043755.2	exon12	c.C2018G	p.P673R	SNP	exonic	PCSK7		nonsynonymous SNV	PCSK7:ENSCAFT00000043755.2:exon12:c.C2018G:p.P673R,PCSK7:ENSCAFT00000020874.5:exon13:c.C1676G:p.P559R	SRP159481	Mammary Tumor
SRR7780939-SRR7780938	chr6	21853263	21853263	G	C	PRKCB	Missense_Mutation	ENSCAFT00000064389.1	exon5	c.C430G	p.P144A	SNP	exonic	PRKCB		nonsynonymous SNV	PRKCB:ENSCAFT00000064389.1:exon5:c.C430G:p.P144A,PRKCB:ENSCAFT00000027949.4:exon6:c.C886G:p.P296A	SRP159481	Mammary Tumor
SRR7780941-SRR7780940	chr12	15726960	15726960	C	T	ADGRF2	Missense_Mutation	ENSCAFT00000003307.5	exon6	c.C1564T	p.R522W	SNP	exonic	ADGRF2		nonsynonymous SNV	ADGRF2:ENSCAFT00000003307.5:exon6:c.C1564T:p.R522W,ADGRF2:ENSCAFT00000048418.2:exon6:c.C1564T:p.R522W	SRP159481	Mammary Tumor
SRR7780941-SRR7780940	chr17	58673293	58673293	C	T	ANKRD35	Missense_Mutation	ENSCAFT00000018011.4	exon8	c.G650A	p.S217N	SNP	exonic	ANKRD35		nonsynonymous SNV	ANKRD35:ENSCAFT00000018011.4:exon8:c.G650A:p.S217N	SRP159481	Mammary Tumor
SRR7780941-SRR7780940	chr21	27677256	27677256	T	A	OR52AB4	Missense_Mutation	ENSCAFT00000037238.3	exon1	c.T710A	p.L237H	SNP	exonic	OR52AB4		nonsynonymous SNV	OR52AB4:ENSCAFT00000037238.3:exon1:c.T710A:p.L237H	SRP159481	Mammary Tumor
SRR7780941-SRR7780940	chr5	80028255	80028255	C	G	NFAT5	Missense_Mutation	ENSCAFT00000059548.1	exon7	c.G1332C	p.W444C	SNP	exonic	NFAT5		nonsynonymous SNV	NFAT5:ENSCAFT00000059548.1:exon7:c.G1332C:p.W444C,NFAT5:ENSCAFT00000068166.1:exon7:c.G1332C:p.W444C,NFAT5:ENSCAFT00000074637.1:exon7:c.G1032C:p.W344C,NFAT5:ENSCAFT00000032267.5:exon8:c.G1443C:p.W481C,NFAT5:ENSCAFT00000069148.1:exon8:c.G1236C:p.W412C,NFAT5:ENSCAFT00000071157.1:exon8:c.G1182C:p.W394C	SRP159481	Mammary Tumor
SRR7780941-SRR7780940	chr5	80028256	80028256	C	G	NFAT5	Missense_Mutation	ENSCAFT00000059548.1	exon7	c.G1331C	p.W444S	SNP	exonic	NFAT5		nonsynonymous SNV	NFAT5:ENSCAFT00000059548.1:exon7:c.G1331C:p.W444S,NFAT5:ENSCAFT00000068166.1:exon7:c.G1331C:p.W444S,NFAT5:ENSCAFT00000074637.1:exon7:c.G1031C:p.W344S,NFAT5:ENSCAFT00000032267.5:exon8:c.G1442C:p.W481S,NFAT5:ENSCAFT00000069148.1:exon8:c.G1235C:p.W412S,NFAT5:ENSCAFT00000071157.1:exon8:c.G1181C:p.W394S	SRP159481	Mammary Tumor
SRR7780941-SRR7780940	chr5	80461524	80461524	G	A	SNTB2	Missense_Mutation	ENSCAFT00000032309.4	exon1	c.C98T	p.A33V	SNP	exonic	SNTB2		nonsynonymous SNV	SNTB2:ENSCAFT00000032309.4:exon1:c.C98T:p.A33V,SNTB2:ENSCAFT00000092277.1:exon1:c.C98T:p.A33V	SRP159481	Mammary Tumor
SRR7780941-SRR7780940	chr8	72326481	72326481	C	T	AKT1	Missense_Mutation	ENSCAFT00000029177.4	exon2	c.G49A	p.E17K	SNP	exonic	AKT1		nonsynonymous SNV	AKT1:ENSCAFT00000029177.4:exon2:c.G49A:p.E17K,AKT1:ENSCAFT00000066075.1:exon2:c.G49A:p.E17K	SRP159481	Mammary Tumor
SRR7780943-SRR7780942	chr12	15843074	15843074	G	A	OPN5	Missense_Mutation	ENSCAFT00000003319.4	exon4	c.G716A	p.R239Q	SNP	exonic	OPN5		nonsynonymous SNV	OPN5:ENSCAFT00000003319.4:exon4:c.G716A:p.R239Q	SRP159481	Mammary Tumor
SRR7780943-SRR7780942	chr15	35025678	35025678	G	A	NR2C1	Missense_Mutation	ENSCAFT00000010109.4	exon7	c.C863T	p.A288V	SNP	exonic	NR2C1		nonsynonymous SNV	NR2C1:ENSCAFT00000010109.4:exon7:c.C863T:p.A288V	SRP159481	Mammary Tumor
SRR7780943-SRR7780942	chr16	45270674	45270674	G	A	SNX25	Missense_Mutation	ENSCAFT00000064379.1	exon17	c.C2417T	p.A806V	SNP	exonic	SNX25		nonsynonymous SNV	SNX25:ENSCAFT00000064379.1:exon17:c.C2417T:p.A806V,SNX25:ENSCAFT00000083434.1:exon17:c.C1523T:p.A508V,SNX25:ENSCAFT00000038740.3:exon18:c.C2486T:p.A829V,SNX25:ENSCAFT00000091045.1:exon18:c.C2705T:p.A902V	SRP159481	Mammary Tumor
SRR7780943-SRR7780942	chr16	55392939	55392939	C	T	CSMD1	Missense_Mutation	ENSCAFT00000013885.4	exon26	c.G4118A	p.R1373H	SNP	exonic	CSMD1		nonsynonymous SNV	CSMD1:ENSCAFT00000013885.4:exon26:c.G4118A:p.R1373H	SRP159481	Mammary Tumor
SRR7780943-SRR7780942	chr19	28818019	28818019	A	G	CLASP1	Missense_Mutation	ENSCAFT00000070515.1	exon37	c.A4322G	p.N1441S	SNP	exonic	CLASP1		nonsynonymous SNV	CLASP1:ENSCAFT00000070515.1:exon37:c.A4322G:p.N1441S,CLASP1:ENSCAFT00000078329.1:exon37:c.A4346G:p.N1449S,CLASP1:ENSCAFT00000007674.4:exon38:c.A4427G:p.N1476S,CLASP1:ENSCAFT00000047299.3:exon38:c.A4409G:p.N1470S,CLASP1:ENSCAFT00000064343.1:exon38:c.A4370G:p.N1457S	SRP159481	Mammary Tumor
SRR7780943-SRR7780942	chr21	27299842	27299842	G	A	OR51H1	Missense_Mutation	ENSCAFT00000019912.4	exon1	c.C47T	p.T16M	SNP	exonic	OR51H1		nonsynonymous SNV	OR51H1:ENSCAFT00000019912.4:exon1:c.C47T:p.T16M	SRP159481	Mammary Tumor
SRR7780943-SRR7780942	chr27	7010521	7010521	C	T	RAPGEF3	Missense_Mutation	ENSCAFT00000039555.4	exon17	c.C1613T	p.A538V	SNP	exonic	RAPGEF3		nonsynonymous SNV	RAPGEF3:ENSCAFT00000039555.4:exon17:c.C1613T:p.A538V,RAPGEF3:ENSCAFT00000014611.4:exon19:c.C1730T:p.A577V	SRP159481	Mammary Tumor
SRR7780946-SRR7780957	chr10	13943984	13943984	C	T	TRHDE	Missense_Mutation	ENSCAFT00000000753.4	exon6	c.C1151T	p.P384L	SNP	exonic	TRHDE		nonsynonymous SNV	TRHDE:ENSCAFT00000000753.4:exon6:c.C1151T:p.P384L	SRP159481	Mammary Tumor
SRR7780946-SRR7780957	chr12	67854603	67854603	T	C	REV3L	Missense_Mutation	ENSCAFT00000006350.4	exon12	c.A4610G	p.N1537S	SNP	exonic	REV3L		nonsynonymous SNV	REV3L:ENSCAFT00000006350.4:exon12:c.A4610G:p.N1537S,REV3L:ENSCAFT00000066032.1:exon13:c.A4685G:p.N1562S,REV3L:ENSCAFT00000066840.1:exon13:c.A4685G:p.N1562S,REV3L:ENSCAFT00000006343.5:exon14:c.A4451G:p.N1484S,REV3L:ENSCAFT00000073026.1:exon14:c.A4451G:p.N1484S,REV3L:ENSCAFT00000078921.1:exon14:c.A4451G:p.N1484S	SRP159481	Mammary Tumor
SRR7780946-SRR7780957	chr22	60888291	60888291	C	T	TFDP1	Missense_Mutation	ENSCAFT00000061091.1	exon4	c.C512T	p.A171V	SNP	exonic	TFDP1		nonsynonymous SNV	TFDP1:ENSCAFT00000061091.1:exon4:c.C512T:p.A171V,TFDP1:ENSCAFT00000076962.1:exon4:c.C512T:p.A171V,TFDP1:ENSCAFT00000010314.4:exon5:c.C446T:p.A149V	SRP159481	Mammary Tumor
SRR7780946-SRR7780957	chr24	18578153	18578153	C	A	TMC2	Missense_Mutation	ENSCAFT00000010757.5	exon20	c.G2709T	p.Q903H	SNP	exonic	TMC2		nonsynonymous SNV	TMC2:ENSCAFT00000010757.5:exon20:c.G2709T:p.Q903H	SRP159481	Mammary Tumor
SRR7780946-SRR7780957	chr3	31301088	31301088	C	T	OR6C1	Missense_Mutation	ENSCAFT00000090237.1	exon1	c.C713T	p.T238I	SNP	exonic	OR6C1		nonsynonymous SNV	OR6C1:ENSCAFT00000090237.1:exon1:c.C713T:p.T238I	SRP159481	Mammary Tumor
SRR7780946-SRR7780957	chr34	12675674	12675674	A	G	PIK3CA	Missense_Mutation	ENSCAFT00000080543.1	exon20	c.A3140G	p.H1047R	SNP	exonic	PIK3CA		nonsynonymous SNV	PIK3CA:ENSCAFT00000080543.1:exon20:c.A3140G:p.H1047R	SRP159481	Mammary Tumor
SRR7780946-SRR7780957	chr37	24624928	24624928	C	G	TNS1	Missense_Mutation	ENSCAFT00000065916.1	exon17	c.G3064C	p.E1022Q	SNP	exonic	TNS1		nonsynonymous SNV	TNS1:ENSCAFT00000065916.1:exon17:c.G3064C:p.E1022Q,TNS1:ENSCAFT00000066684.1:exon17:c.G3064C:p.E1022Q,TNS1:ENSCAFT00000023184.5:exon19:c.G2086C:p.E696Q,TNS1:ENSCAFT00000060882.1:exon19:c.G2461C:p.E821Q,TNS1:ENSCAFT00000060998.1:exon19:c.G2461C:p.E821Q,TNS1:ENSCAFT00000061434.1:exon19:c.G2461C:p.E821Q,TNS1:ENSCAFT00000066130.1:exon19:c.G2461C:p.E821Q,TNS1:ENSCAFT00000082385.1:exon19:c.G2461C:p.E82…	SRP159481	Mammary Tumor
SRR7780946-SRR7780957	chr4	75884117	75884117	C	T	DROSHA	Missense_Mutation	ENSCAFT00000030086.4	exon28	c.C3560T	p.A1187V	SNP	exonic	DROSHA		nonsynonymous SNV	DROSHA:ENSCAFT00000030086.4:exon28:c.C3560T:p.A1187V,DROSHA:ENSCAFT00000045678.2:exon29:c.C3671T:p.A1224V	SRP159481	Mammary Tumor
SRR7780946-SRR7780957	chr7	42000803	42000803	G	A	MSTO1	Missense_Mutation	ENSCAFT00000026803.4	exon13	c.C1412T	p.A471V	SNP	exonic	MSTO1		nonsynonymous SNV	MSTO1:ENSCAFT00000026803.4:exon13:c.C1412T:p.A471V	SRP159481	Mammary Tumor
SRR7780946-SRR7780957	chr8	1095249	1095249	C	A	TC2N	Missense_Mutation	ENSCAFT00000062467.1	exon10	c.G1237T	p.V413L	SNP	exonic	TC2N		nonsynonymous SNV	TC2N:ENSCAFT00000062467.1:exon10:c.G1237T:p.V413L,TC2N:ENSCAFT00000068894.1:exon10:c.G1162T:p.V388L,TC2N:ENSCAFT00000017222.4:exon11:c.G1354T:p.V452L	SRP159481	Mammary Tumor
SRR7780946-SRR7780957	chr9	26475886	26475886	G	A	SPATA20	Missense_Mutation	ENSCAFT00000027073.5	exon16	c.G2243A	p.R748H	SNP	exonic	SPATA20		nonsynonymous SNV	SPATA20:ENSCAFT00000027073.5:exon16:c.G2243A:p.R748H,SPATA20:ENSCAFT00000048099.2:exon16:c.G2243A:p.R748H	SRP159481	Mammary Tumor
SRR7780946-SRR7780957	chr21	27345500	27345500	A	G	OR51A7	Missense_Mutation	ENSCAFT00000019978.4	exon2	c.A800G	p.Q267R	SNP	exonic	OR51A7		nonsynonymous SNV	OR51A7:ENSCAFT00000019978.4:exon2:c.A800G:p.Q267R	SRP159481	Mammary Tumor
SRR7780952-SRR7781054	chr12	33216826	33216826	A	G	SMAP1	Missense_Mutation	ENSCAFT00000004108.4	exon4	c.A406G	p.I136V	SNP	exonic	SMAP1		nonsynonymous SNV	SMAP1:ENSCAFT00000004108.4:exon4:c.A406G:p.I136V,SMAP1:ENSCAFT00000004110.5:exon4:c.A406G:p.I136V,SMAP1:ENSCAFT00000065048.1:exon4:c.A406G:p.I136V,SMAP1:ENSCAFT00000073837.1:exon4:c.A406G:p.I136V,SMAP1:ENSCAFT00000081170.1:exon4:c.A379G:p.I127V	SRP159481	Mammary Tumor
SRR7780952-SRR7781054	chr23	49282098	49282098	C	A	PLCH1	Missense_Mutation	ENSCAFT00000079844.1	exon21	c.G4522T	p.A1508S	SNP	exonic	PLCH1		nonsynonymous SNV	PLCH1:ENSCAFT00000079844.1:exon21:c.G4522T:p.A1508S,PLCH1:ENSCAFT00000085170.1:exon21:c.G4387T:p.A1463S,PLCH1:ENSCAFT00000013905.5:exon22:c.G4594T:p.A1532S,PLCH1:ENSCAFT00000079457.1:exon23:c.G4615T:p.A1539S,PLCH1:ENSCAFT00000082893.1:exon23:c.G4654T:p.A1552S	SRP159481	Mammary Tumor
SRR7780952-SRR7781054	chr29	38637696	38637696	G	T	RBM12B	Missense_Mutation	ENSCAFT00000014490.5	exon1	c.C28A	p.L10I	SNP	exonic	RBM12B		nonsynonymous SNV	RBM12B:ENSCAFT00000014490.5:exon1:c.C28A:p.L10I	SRP159481	Mammary Tumor
SRR7780952-SRR7781054	chr34	12675674	12675674	A	G	PIK3CA	Missense_Mutation	ENSCAFT00000080543.1	exon20	c.A3140G	p.H1047R	SNP	exonic	PIK3CA		nonsynonymous SNV	PIK3CA:ENSCAFT00000080543.1:exon20:c.A3140G:p.H1047R	SRP159481	Mammary Tumor
SRR7780952-SRR7781054	chr36	27525139	27525139	A	T	ZNF804A	Missense_Mutation	ENSCAFT00000022956.4	exon2	c.A1044T	p.K348N	SNP	exonic	ZNF804A		nonsynonymous SNV	ZNF804A:ENSCAFT00000022956.4:exon2:c.A1044T:p.K348N,ZNF804A:ENSCAFT00000048507.3:exon4:c.A1320T:p.K440N	SRP159481	Mammary Tumor
SRR7780954-SRR7780953	chr16	55387899	55387899	A	T	CSMD1	Missense_Mutation	ENSCAFT00000013885.4	exon27	c.T4298A	p.I1433N	SNP	exonic	CSMD1		nonsynonymous SNV	CSMD1:ENSCAFT00000013885.4:exon27:c.T4298A:p.I1433N	SRP159481	Mammary Tumor
SRR7780954-SRR7780953	chr23	36631059	36631059	G	T	CLSTN2	Missense_Mutation	ENSCAFT00000049781.3	exon14	c.G2107T	p.V703L	SNP	exonic	CLSTN2		nonsynonymous SNV	CLSTN2:ENSCAFT00000049781.3:exon14:c.G2107T:p.V703L	SRP159481	Mammary Tumor
SRR7780954-SRR7780953	chr30	2478780	2478780	A	G	GJD2	Missense_Mutation	ENSCAFT00000013090.3	exon2	c.T920C	p.V307A	SNP	exonic	GJD2		nonsynonymous SNV	GJD2:ENSCAFT00000013090.3:exon2:c.T920C:p.V307A	SRP159481	Mammary Tumor
SRR7780954-SRR7780953	chr34	12675675	12675675	T	A	PIK3CA	Missense_Mutation	ENSCAFT00000080543.1	exon20	c.T3141A	p.H1047Q	SNP	exonic	PIK3CA		nonsynonymous SNV	PIK3CA:ENSCAFT00000080543.1:exon20:c.T3141A:p.H1047Q	SRP159481	Mammary Tumor
SRR7780954-SRR7780953	chr21	27089986	27089986	A	G	OR51F23	Missense_Mutation	ENSCAFT00000076505.1	exon1	c.T83C	p.F28S	SNP	exonic	OR51F23		nonsynonymous SNV	OR51F23:ENSCAFT00000076505.1:exon1:c.T83C:p.F28S	SRP159481	Mammary Tumor
SRR7780958-SRR7780903	chr1	102425788	102425788	G	C	PPP6R1	Missense_Mutation	ENSCAFT00000004103.5	exon21	c.G2393C	p.G798A	SNP	exonic	PPP6R1		nonsynonymous SNV	PPP6R1:ENSCAFT00000004103.5:exon21:c.G2393C:p.G798A,PPP6R1:ENSCAFT00000046834.3:exon21:c.G2393C:p.G798A	SRP159481	Mammary Tumor
SRR7780958-SRR7780903	chr18	25644628	25644628	C	A	HRAS	Missense_Mutation	ENSCAFT00000048281.2	exon1	c.G35T	p.G12V	SNP	exonic	HRAS		nonsynonymous SNV	HRAS:ENSCAFT00000048281.2:exon1:c.G35T:p.G12V,HRAS:ENSCAFT00000064077.1:exon1:c.G35T:p.G12V	SRP159481	Mammary Tumor
SRR7780958-SRR7780903	chr34	12675674	12675674	A	G	PIK3CA	Missense_Mutation	ENSCAFT00000080543.1	exon20	c.A3140G	p.H1047R	SNP	exonic	PIK3CA		nonsynonymous SNV	PIK3CA:ENSCAFT00000080543.1:exon20:c.A3140G:p.H1047R	SRP159481	Mammary Tumor
SRR7780958-SRR7780903	chr34	30365957	30365957	A	T	SI	Missense_Mutation	ENSCAFT00000022936.4	exon4	c.T49A	p.C17S	SNP	exonic	SI		nonsynonymous SNV	SI:ENSCAFT00000022936.4:exon4:c.T49A:p.C17S	SRP159481	Mammary Tumor
SRR7780958-SRR7780903	chr4	39949591	39949591	C	T	SH3PXD2B	Missense_Mutation	ENSCAFT00000091284.1	exon11	c.C2183T	p.A728V	SNP	exonic	SH3PXD2B		nonsynonymous SNV	SH3PXD2B:ENSCAFT00000091284.1:exon11:c.C2183T:p.A728V,SH3PXD2B:ENSCAFT00000059723.1:exon12:c.C2288T:p.A763V,SH3PXD2B:ENSCAFT00000026637.4:exon13:c.C2288T:p.A763V,SH3PXD2B:ENSCAFT00000071925.1:exon13:c.C2381T:p.A794V,SH3PXD2B:ENSCAFT00000064091.1:exon14:c.C2273T:p.A758V	SRP159481	Mammary Tumor
SRR7780958-SRR7780903	chr5	28854006	28854006	G	C	MMP13	Missense_Mutation	ENSCAFT00000023886.4	exon4	c.G276C	p.R92S	SNP	exonic	MMP13		nonsynonymous SNV	MMP13:ENSCAFT00000023886.4:exon4:c.G276C:p.R92S	SRP159481	Mammary Tumor
SRR7780958-SRR7780903	chr6	10816248	10816248	C	G	NPTX2	Missense_Mutation	ENSCAFT00000024339.4	exon1	c.G325C	p.A109P	SNP	exonic	NPTX2		nonsynonymous SNV	NPTX2:ENSCAFT00000024339.4:exon1:c.G325C:p.A109P	SRP159481	Mammary Tumor
SRR7780958-SRR7780903	chr6	68881905	68881905	C	T	DNAJB4	Missense_Mutation	ENSCAFT00000032419.4	exon2	c.G487A	p.E163K	SNP	exonic	DNAJB4		nonsynonymous SNV	DNAJB4:ENSCAFT00000032419.4:exon2:c.G487A:p.E163K	SRP159481	Mammary Tumor
SRR7780958-SRR7780903	chr9	22597997	22597997	G	A	ORMDL3	Missense_Mutation	ENSCAFT00000074751.1	exon1	c.G59A	p.R20H	SNP	exonic	ORMDL3		nonsynonymous SNV	ORMDL3:ENSCAFT00000074751.1:exon1:c.G59A:p.R20H,ORMDL3:ENSCAFT00000046506.2:exon2:c.G59A:p.R20H	SRP159481	Mammary Tumor
SRR7780960-SRR7780959	chr1	25815510	25815510	T	A	SLC18B1	Missense_Mutation	ENSCAFT00000000298.5	exon4	c.A292T	p.M98L	SNP	exonic	SLC18B1		nonsynonymous SNV	SLC18B1:ENSCAFT00000000298.5:exon4:c.A292T:p.M98L,SLC18B1:ENSCAFT00000045372.2:exon4:c.A628T:p.M210L,SLC18B1:ENSCAFT00000081672.1:exon4:c.A628T:p.M210L,SLC18B1:ENSCAFT00000081886.1:exon4:c.A319T:p.M107L,SLC18B1:ENSCAFT00000086055.1:exon4:c.A628T:p.M210L	SRP159481	Mammary Tumor
SRR7780960-SRR7780959	chr12	10370903	10370903	G	A	TFEB	Missense_Mutation	ENSCAFT00000085641.1	exon5	c.C493T	p.R165C	SNP	exonic	TFEB		nonsynonymous SNV	TFEB:ENSCAFT00000085641.1:exon5:c.C493T:p.R165C,TFEB:ENSCAFT00000002508.5:exon7:c.C823T:p.R275C,TFEB:ENSCAFT00000087703.1:exon7:c.C1021T:p.R341C,TFEB:ENSCAFT00000063426.1:exon8:c.C748T:p.R250C,TFEB:ENSCAFT00000088848.1:exon8:c.C910T:p.R304C	SRP159481	Mammary Tumor
SRR7780960-SRR7780959	chr12	68576073	68576073	C	T	LAMA4	Missense_Mutation	ENSCAFT00000080406.1	exon15	c.G2189A	p.R730H	SNP	exonic	LAMA4		nonsynonymous SNV	LAMA4:ENSCAFT00000080406.1:exon15:c.G2189A:p.R730H,LAMA4:ENSCAFT00000006483.4:exon16:c.G1934A:p.R645H	SRP159481	Mammary Tumor
SRR7780960-SRR7780959	chr18	41143055	41143055	G	T	DLA-79	Missense_Mutation	ENSCAFT00000013073.4	exon1	c.G560T	p.S187I	SNP	exonic	DLA-79		nonsynonymous SNV	DLA-79:ENSCAFT00000013073.4:exon1:c.G560T:p.S187I,DLA-79:ENSCAFT00000077069.1:exon1:c.G560T:p.S187I,DLA-79:ENSCAFT00000083437.1:exon1:c.G560T:p.S187I,DLA-79:ENSCAFT00000038631.4:exon2:c.G353T:p.S118I,DLA-79:ENSCAFT00000093636.1:exon2:c.G353T:p.S118I	SRP159481	Mammary Tumor
SRR7780960-SRR7780959	chr34	12675674	12675674	A	G	PIK3CA	Missense_Mutation	ENSCAFT00000080543.1	exon20	c.A3140G	p.H1047R	SNP	exonic	PIK3CA		nonsynonymous SNV	PIK3CA:ENSCAFT00000080543.1:exon20:c.A3140G:p.H1047R	SRP159481	Mammary Tumor
SRR7780960-SRR7780959	chr34	12675677	12675677	A	G	PIK3CA	Missense_Mutation	ENSCAFT00000080543.1	exon20	c.A3143G	p.H1048R	SNP	exonic	PIK3CA		nonsynonymous SNV	PIK3CA:ENSCAFT00000080543.1:exon20:c.A3143G:p.H1048R	SRP159481	Mammary Tumor
SRR7780960-SRR7780959	chr7	16885485	16885485	G	A	SMG7	Missense_Mutation	ENSCAFT00000066079.1	exon5	c.G517A	p.A173T	SNP	exonic	SMG7		nonsynonymous SNV	SMG7:ENSCAFT00000066079.1:exon5:c.G517A:p.A173T,SMG7:ENSCAFT00000021097.4:exon6:c.G529A:p.A177T,SMG7:ENSCAFT00000075995.1:exon6:c.G286A:p.A96T,SMG7:ENSCAFT00000085245.1:exon6:c.G436A:p.A146T,SMG7:ENSCAFT00000091050.1:exon6:c.G499A:p.A167T	SRP159481	Mammary Tumor
SRR7780960-SRR7780959	chr9	37844521	37844521	A	G	TAF15	Missense_Mutation	ENSCAFT00000070071.1	exon17	c.T1331C	p.V444A	SNP	exonic	TAF15		nonsynonymous SNV	TAF15:ENSCAFT00000070071.1:exon17:c.T1331C:p.V444A	SRP159481	Mammary Tumor
SRR7780960-SRR7780959	chr3	52372923	52372923	T	G	POLG	Missense_Mutation	ENSCAFT00000018896.5	exon1	c.A152C	p.Q51P	SNP	exonic	POLG		nonsynonymous SNV	POLG:ENSCAFT00000018896.5:exon1:c.A152C:p.Q51P,POLG:ENSCAFT00000064590.1:exon1:c.A152C:p.Q51P,POLG:ENSCAFT00000076802.1:exon1:c.A152C:p.Q51P,POLG:ENSCAFT00000078201.1:exon1:c.A152C:p.Q51P,POLG:ENSCAFT00000082327.1:exon1:c.A152C:p.Q51P,POLG:ENSCAFT00000082743.1:exon2:c.A485C:p.Q162P	SRP159481	Mammary Tumor
SRR7780965-SRR7780962	chr19	46425168	46425168	C	A	ZEB2	Missense_Mutation	ENSCAFT00000084411.1	exon7	c.G3101T	p.R1034L	SNP	exonic	ZEB2		nonsynonymous SNV	ZEB2:ENSCAFT00000084411.1:exon7:c.G3101T:p.R1034L,ZEB2:ENSCAFT00000008867.2:exon8:c.G2987T:p.R996L,ZEB2:ENSCAFT00000087307.1:exon9:c.G3452T:p.R1151L	SRP159481	Mammary Tumor
SRR7780965-SRR7780962	chr20	47952181	47952181	C	A	ADGRE2	Missense_Mutation	ENSCAFT00000025982.5	exon9	c.G1141T	p.D381Y	SNP	exonic	ADGRE2		nonsynonymous SNV	ADGRE2:ENSCAFT00000025982.5:exon9:c.G1141T:p.D381Y,ADGRE2:ENSCAFT00000025976.4:exon10:c.G1087T:p.D363Y,ADGRE2:ENSCAFT00000025980.5:exon11:c.G1219T:p.D407Y	SRP159481	Mammary Tumor
SRR7780965-SRR7780962	chr24	39765268	39765268	C	T	BCAS1	Missense_Mutation	ENSCAFT00000018776.5	exon2	c.G398A	p.G133D	SNP	exonic	BCAS1		nonsynonymous SNV	BCAS1:ENSCAFT00000018776.5:exon2:c.G398A:p.G133D,BCAS1:ENSCAFT00000018783.4:exon4:c.G449A:p.G150D,BCAS1:ENSCAFT00000018789.5:exon4:c.G449A:p.G150D,BCAS1:ENSCAFT00000055529.2:exon4:c.G449A:p.G150D,BCAS1:ENSCAFT00000063370.1:exon4:c.G449A:p.G150D,BCAS1:ENSCAFT00000069105.1:exon4:c.G449A:p.G150D,BCAS1:ENSCAFT00000071424.1:exon4:c.G449A:p.G150D,BCAS1:ENSCAFT00000088551.1:exon4:c.G449A:p.G150D,BCAS1:E…	SRP159481	Mammary Tumor
SRR7780965-SRR7780962	chr30	16210503	16210503	C	T	HDC	Missense_Mutation	ENSCAFT00000023936.4	exon9	c.G1012A	p.A338T	SNP	exonic	HDC		nonsynonymous SNV	HDC:ENSCAFT00000023936.4:exon9:c.G1012A:p.A338T,HDC:ENSCAFT00000070959.1:exon9:c.G1012A:p.A338T	SRP159481	Mammary Tumor
SRR7780967-SRR7780964	chr1	1052087	1052087	G	T	NFATC1	Missense_Mutation	ENSCAFT00000000013.4	exon10	c.C2295A	p.D765E	SNP	exonic	NFATC1		nonsynonymous SNV	NFATC1:ENSCAFT00000000013.4:exon10:c.C2295A:p.D765E	SRP159481	Mammary Tumor
SRR7780967-SRR7780964	chr1	110979254	110979254	T	C	ZNF235	Missense_Mutation	ENSCAFT00000091431.1	exon6	c.T1465C	p.F489L	SNP	exonic	ZNF235		nonsynonymous SNV	ZNF235:ENSCAFT00000091431.1:exon6:c.T1465C:p.F489L	SRP159481	Mammary Tumor
SRR7780967-SRR7780964	chr11	21116852	21116852	C	T	SHROOM1	Missense_Mutation	ENSCAFT00000001419.5	exon6	c.G2201A	p.R734H	SNP	exonic	SHROOM1		nonsynonymous SNV	SHROOM1:ENSCAFT00000001419.5:exon6:c.G2201A:p.R734H	SRP159481	Mammary Tumor
SRR7780967-SRR7780964	chr14	11114517	11114517	G	T	GPR37	Missense_Mutation	ENSCAFT00000002752.3	exon1	c.G103T	p.G35W	SNP	exonic	GPR37		nonsynonymous SNV	GPR37:ENSCAFT00000002752.3:exon1:c.G103T:p.G35W	SRP159481	Mammary Tumor
SRR7780967-SRR7780964	chr14	23639575	23639575	T	A	GLCCI1	Missense_Mutation	ENSCAFT00000003525.5	exon8	c.T656A	p.L219H	SNP	exonic	GLCCI1		nonsynonymous SNV	GLCCI1:ENSCAFT00000003525.5:exon8:c.T656A:p.L219H	SRP159481	Mammary Tumor
SRR7780967-SRR7780964	chr18	181120	181120	A	G	ABCA13	Missense_Mutation	ENSCAFT00000005349.5	exon6	c.A3701G	p.K1234R	SNP	exonic	ABCA13		nonsynonymous SNV	ABCA13:ENSCAFT00000005349.5:exon6:c.A3701G:p.K1234R,ABCA13:ENSCAFT00000044856.2:exon8:c.A4415G:p.K1472R	SRP159481	Mammary Tumor
SRR7780967-SRR7780964	chr19	4968436	4968436	C	G	PCDH18	Missense_Mutation	ENSCAFT00000006044.4	exon1	c.C496G	p.L166V	SNP	exonic	PCDH18		nonsynonymous SNV	PCDH18:ENSCAFT00000006044.4:exon1:c.C496G:p.L166V	SRP159481	Mammary Tumor
SRR7780967-SRR7780964	chr23	38918765	38918765	G	T	SLC9A9	Missense_Mutation	ENSCAFT00000012813.4	exon15	c.C1545A	p.N515K	SNP	exonic	SLC9A9		nonsynonymous SNV	SLC9A9:ENSCAFT00000012813.4:exon15:c.C1545A:p.N515K	SRP159481	Mammary Tumor
SRR7780967-SRR7780964	chr28	40746174	40746174	G	A	ADGRA1	Missense_Mutation	ENSCAFT00000021738.4	exon6	c.G1397A	p.R466H	SNP	exonic	ADGRA1		nonsynonymous SNV	ADGRA1:ENSCAFT00000021738.4:exon6:c.G1397A:p.R466H,ADGRA1:ENSCAFT00000081921.1:exon6:c.G1328A:p.R443H	SRP159481	Mammary Tumor
SRR7780967-SRR7780964	chr29	113137	113137	T	A	PRKDC	Missense_Mutation	ENSCAFT00000072240.1	exon50	c.A6821T	p.E2274V	SNP	exonic	PRKDC		nonsynonymous SNV	PRKDC:ENSCAFT00000072240.1:exon50:c.A6821T:p.E2274V,PRKDC:ENSCAFT00000081819.1:exon50:c.A6875T:p.E2292V,PRKDC:ENSCAFT00000059988.1:exon51:c.A6980T:p.E2327V,PRKDC:ENSCAFT00000068077.1:exon52:c.A6914T:p.E2305V,PRKDC:ENSCAFT00000064235.1:exon53:c.A6998T:p.E2333V,PRKDC:ENSCAFT00000079094.1:exon53:c.A7028T:p.E2343V,PRKDC:ENSCAFT00000060250.1:exon54:c.A7148T:p.E2383V,PRKDC:ENSCAFT00000072088.1:exon57:c…	SRP159481	Mammary Tumor
SRR7780967-SRR7780964	chr34	12675674	12675674	A	G	PIK3CA	Missense_Mutation	ENSCAFT00000080543.1	exon20	c.A3140G	p.H1047R	SNP	exonic	PIK3CA		nonsynonymous SNV	PIK3CA:ENSCAFT00000080543.1:exon20:c.A3140G:p.H1047R	SRP159481	Mammary Tumor
SRR7780967-SRR7780964	chr37	15195604	15195604	C	T	DYTN	Missense_Mutation	ENSCAFT00000038162.3	exon13	c.G1678A	p.G560R	SNP	exonic	DYTN		nonsynonymous SNV	DYTN:ENSCAFT00000038162.3:exon13:c.G1678A:p.G560R	SRP159481	Mammary Tumor
SRR7780967-SRR7780964	chr6	8933689	8933689	C	T	EPHB4	Missense_Mutation	ENSCAFT00000064648.1	exon6	c.C833T	p.A278V	SNP	exonic	EPHB4		nonsynonymous SNV	EPHB4:ENSCAFT00000064648.1:exon6:c.C833T:p.A278V,EPHB4:ENSCAFT00000022498.4:exon8:c.C1168T:p.R390W,EPHB4:ENSCAFT00000063196.1:exon9:c.C1447T:p.R483W,EPHB4:ENSCAFT00000072183.1:exon9:c.C1447T:p.R483W	SRP159481	Mammary Tumor
SRR7780967-SRR7780964	chr6	37648613	37648613	C	T	SLX4	Missense_Mutation	ENSCAFT00000030592.4	exon1	c.C272T	p.P91L	SNP	exonic	SLX4		nonsynonymous SNV	SLX4:ENSCAFT00000030592.4:exon1:c.C272T:p.P91L	SRP159481	Mammary Tumor
SRR7780967-SRR7780964	chr8	63256583	63256583	C	T	PPP4R4	Missense_Mutation	ENSCAFT00000038810.3	exon6	c.C583T	p.R195W	SNP	exonic	PPP4R4		nonsynonymous SNV	PPP4R4:ENSCAFT00000038810.3:exon6:c.C583T:p.R195W,PPP4R4:ENSCAFT00000027971.5:exon7:c.C457T:p.R153W	SRP159481	Mammary Tumor
SRR7780969-SRR7780966	chr1	57245753	57245753	G	A	RFX6	Missense_Mutation	ENSCAFT00000001421.4	exon3	c.G382A	p.V128I	SNP	exonic	RFX6		nonsynonymous SNV	RFX6:ENSCAFT00000001421.4:exon3:c.G382A:p.V128I	SRP159481	Mammary Tumor
SRR7780969-SRR7780966	chr1	103278515	103278515	C	T	CACNG7	Missense_Mutation	ENSCAFT00000046764.2	exon6	c.G685A	p.G229S	SNP	exonic	CACNG7		nonsynonymous SNV	CACNG7:ENSCAFT00000046764.2:exon6:c.G685A:p.G229S	SRP159481	Mammary Tumor
SRR7780969-SRR7780966	chr10	1603306	1603306	C	G	MARS1	Missense_Mutation	ENSCAFT00000088988.1	exon13	c.C1531G	p.Q511E	SNP	exonic	MARS1		nonsynonymous SNV	MARS1:ENSCAFT00000088988.1:exon13:c.C1531G:p.Q511E,MARS1:ENSCAFT00000000365.4:exon14:c.C1648G:p.Q550E	SRP159481	Mammary Tumor
SRR7780969-SRR7780966	chr12	14966295	14966295	C	T	MEP1A	Missense_Mutation	ENSCAFT00000003244.4	exon1	c.C50T	p.A17V	SNP	exonic	MEP1A		nonsynonymous SNV	MEP1A:ENSCAFT00000003244.4:exon1:c.C50T:p.A17V	SRP159481	Mammary Tumor
SRR7780969-SRR7780966	chr14	6756371	6756371	T	C	KLHDC10	Missense_Mutation	ENSCAFT00000002333.4	exon8	c.A1064G	p.Y355C	SNP	exonic	KLHDC10		nonsynonymous SNV	KLHDC10:ENSCAFT00000002333.4:exon8:c.A1064G:p.Y355C	SRP159481	Mammary Tumor
SRR7780969-SRR7780966	chr15	50194596	50194596	G	C	FBXW7	Missense_Mutation	ENSCAFT00000012962.5	exon8	c.C1534G	p.R512G	SNP	exonic	FBXW7		nonsynonymous SNV	FBXW7:ENSCAFT00000012962.5:exon8:c.C1534G:p.R512G,FBXW7:ENSCAFT00000065773.1:exon8:c.C1153G:p.R385G,FBXW7:ENSCAFT00000074984.1:exon8:c.C1039G:p.R347G	SRP159481	Mammary Tumor
SRR7780969-SRR7780966	chr17	48757174	48757174	A	G	DCTN1	Missense_Mutation	ENSCAFT00000043956.3	exon26	c.A3286G	p.K1096E	SNP	exonic	DCTN1		nonsynonymous SNV	DCTN1:ENSCAFT00000043956.3:exon26:c.A3286G:p.K1096E,DCTN1:ENSCAFT00000070997.1:exon26:c.A3292G:p.K1098E,DCTN1:ENSCAFT00000086448.1:exon27:c.A3310G:p.K1104E,DCTN1:ENSCAFT00000072554.1:exon28:c.A3328G:p.K1110E,DCTN1:ENSCAFT00000084996.1:exon28:c.A3331G:p.K1111E,DCTN1:ENSCAFT00000013707.4:exon29:c.A3397G:p.K1133E,DCTN1:ENSCAFT00000083482.1:exon29:c.A3346G:p.K1116E	SRP159481	Mammary Tumor
SRR7780969-SRR7780966	chr3	25945529	25945529	G	T	ACOT12	Missense_Mutation	ENSCAFT00000013808.4	exon4	c.G271T	p.V91F	SNP	exonic	ACOT12		nonsynonymous SNV	ACOT12:ENSCAFT00000013808.4:exon4:c.G271T:p.V91F,ACOT12:ENSCAFT00000080269.1:exon4:c.G271T:p.V91F	SRP159481	Mammary Tumor
SRR7780969-SRR7780966	chr31	37737365	37737365	G	A	RRP1	Missense_Mutation	ENSCAFT00000016928.4	exon4	c.G314A	p.R105H	SNP	exonic	RRP1		nonsynonymous SNV	RRP1:ENSCAFT00000016928.4:exon4:c.G314A:p.R105H,RRP1:ENSCAFT00000044230.3:exon4:c.G209A:p.R70H	SRP159481	Mammary Tumor
SRR7780969-SRR7780966	chr34	12660730	12660730	T	C	PIK3CA	Missense_Mutation	ENSCAFT00000080543.1	exon7	c.T1258C	p.C420R	SNP	exonic	PIK3CA		nonsynonymous SNV	PIK3CA:ENSCAFT00000080543.1:exon7:c.T1258C:p.C420R,PIK3CA:ENSCAFT00000017863.4:exon8:c.T1258C:p.C420R	SRP159481	Mammary Tumor
SRR7780969-SRR7780966	chr5	10526656	10526656	G	T	OR8B4	Missense_Mutation	ENSCAFT00000017872.4	exon1	c.C172A	p.P58T	SNP	exonic	OR8B4		nonsynonymous SNV	OR8B4:ENSCAFT00000017872.4:exon1:c.C172A:p.P58T	SRP159481	Mammary Tumor
SRR7780969-SRR7780966	chr9	6041228	6041228	G	A	GPR142	Missense_Mutation	ENSCAFT00000007326.4	exon4	c.C386T	p.A129V	SNP	exonic	GPR142		nonsynonymous SNV	GPR142:ENSCAFT00000007326.4:exon4:c.C386T:p.A129V	SRP159481	Mammary Tumor
SRR7780969-SRR7780966	chr9	6800933	6800933	C	A	SDK2	Missense_Mutation	ENSCAFT00000007243.5	exon11	c.C1547A	p.T516N	SNP	exonic	SDK2		nonsynonymous SNV	SDK2:ENSCAFT00000007243.5:exon11:c.C1547A:p.T516N	SRP159481	Mammary Tumor
SRR7780969-SRR7780966	chr9	52628485	52628485	G	A	POMT1	Missense_Mutation	ENSCAFT00000087099.1	exon3	c.C190T	p.R64C	SNP	exonic	POMT1		nonsynonymous SNV	POMT1:ENSCAFT00000087099.1:exon3:c.C190T:p.R64C	SRP159481	Mammary Tumor
SRR7780970-SRR7780971	chr1	107488552	107488552	C	A	PPP1R15A	Missense_Mutation	ENSCAFT00000006240.5	exon1	c.G662T	p.R221L	SNP	exonic	PPP1R15A		nonsynonymous SNV	PPP1R15A:ENSCAFT00000006240.5:exon1:c.G662T:p.R221L	SRP159481	Mammary Tumor
SRR7780970-SRR7780971	chr10	25381954	25381954	G	C	CACNA1I	Missense_Mutation	ENSCAFT00000059550.1	exon33	c.C5630G	p.P1877R	SNP	exonic	CACNA1I		nonsynonymous SNV	CACNA1I:ENSCAFT00000059550.1:exon33:c.C5630G:p.P1877R,CACNA1I:ENSCAFT00000002048.6:exon35:c.C5972G:p.P1991R,CACNA1I:ENSCAFT00000046802.3:exon36:c.C6065G:p.P2022R	SRP159481	Mammary Tumor
SRR7780970-SRR7780971	chr12	19672706	19672706	C	T	PKHD1	Missense_Mutation	ENSCAFT00000003416.4	exon31	c.G5209A	p.V1737M	SNP	exonic	PKHD1		nonsynonymous SNV	PKHD1:ENSCAFT00000003416.4:exon31:c.G5209A:p.V1737M	SRP159481	Mammary Tumor
SRR7780970-SRR7780971	chr12	42276303	42276303	T	C	TENT5A	Missense_Mutation	ENSCAFT00000044046.2	exon2	c.A196G	p.S66G	SNP	exonic	TENT5A		nonsynonymous SNV	TENT5A:ENSCAFT00000044046.2:exon2:c.A196G:p.S66G,TENT5A:ENSCAFT00000074690.1:exon2:c.A196G:p.S66G	SRP159481	Mammary Tumor
SRR7780970-SRR7780971	chr15	59606966	59606966	C	T	NPY5R	Missense_Mutation	ENSCAFT00000046926.2	exon1	c.C56T	p.T19M	SNP	exonic	NPY5R		nonsynonymous SNV	NPY5R:ENSCAFT00000046926.2:exon1:c.C56T:p.T19M	SRP159481	Mammary Tumor
SRR7780970-SRR7780971	chr20	26661214	26661214	G	A	ADAMTS9	Missense_Mutation	ENSCAFT00000063713.1	exon19	c.G2707A	p.V903I	SNP	exonic	ADAMTS9		nonsynonymous SNV	ADAMTS9:ENSCAFT00000063713.1:exon19:c.G2707A:p.V903I,ADAMTS9:ENSCAFT00000081507.1:exon19:c.G2719A:p.V907I,ADAMTS9:ENSCAFT00000010923.4:exon20:c.G2803A:p.V935I,ADAMTS9:ENSCAFT00000063824.1:exon20:c.G2803A:p.V935I,ADAMTS9:ENSCAFT00000080984.1:exon20:c.G2803A:p.V935I,ADAMTS9:ENSCAFT00000091309.1:exon20:c.G2803A:p.V935I	SRP159481	Mammary Tumor
SRR7780970-SRR7780971	chr20	48150765	48150765	G	A	GIPC1	Missense_Mutation	ENSCAFT00000025844.4	exon1	c.G268A	p.V90M	SNP	exonic	GIPC1		nonsynonymous SNV	GIPC1:ENSCAFT00000025844.4:exon1:c.G268A:p.V90M	SRP159481	Mammary Tumor
SRR7780970-SRR7780971	chr23	8092217	8092217	G	T	SLC22A14	Missense_Mutation	ENSCAFT00000008078.4	exon5	c.G869T	p.C290F	SNP	exonic	SLC22A14		nonsynonymous SNV	SLC22A14:ENSCAFT00000008078.4:exon5:c.G869T:p.C290F	SRP159481	Mammary Tumor
SRR7780970-SRR7780971	chr25	35103890	35103890	G	A	LGI3	Missense_Mutation	ENSCAFT00000073441.1	exon8	c.G908A	p.R303H	SNP	exonic	LGI3		nonsynonymous SNV	LGI3:ENSCAFT00000073441.1:exon8:c.G908A:p.R303H,LGI3:ENSCAFT00000015312.4:exon9:c.G980A:p.R327H	SRP159481	Mammary Tumor
SRR7780970-SRR7780971	chr31	120102	120102	G	A	ZNF654	Missense_Mutation	ENSCAFT00000038390.4	exon8	c.C1303T	p.R435C	SNP	exonic	ZNF654		nonsynonymous SNV	ZNF654:ENSCAFT00000038390.4:exon8:c.C1303T:p.R435C,ZNF654:ENSCAFT00000088631.1:exon8:c.C1303T:p.R435C,ZNF654:ENSCAFT00000089053.1:exon8:c.C1138T:p.R380C	SRP159481	Mammary Tumor
SRR7780970-SRR7780971	chr32	30022909	30022909	C	T	RRH	Missense_Mutation	ENSCAFT00000018265.4	exon6	c.C755T	p.S252F	SNP	exonic	RRH		nonsynonymous SNV	RRH:ENSCAFT00000018265.4:exon6:c.C755T:p.S252F	SRP159481	Mammary Tumor
SRR7780970-SRR7780971	chr34	12675674	12675674	A	G	PIK3CA	Missense_Mutation	ENSCAFT00000080543.1	exon20	c.A3140G	p.H1047R	SNP	exonic	PIK3CA		nonsynonymous SNV	PIK3CA:ENSCAFT00000080543.1:exon20:c.A3140G:p.H1047R	SRP159481	Mammary Tumor
SRR7780970-SRR7780971	chr5	41133577	41133577	C	T	PRPSAP2	Missense_Mutation	ENSCAFT00000074866.1	exon5	c.G604A	p.E202K	SNP	exonic	PRPSAP2		nonsynonymous SNV	PRPSAP2:ENSCAFT00000074866.1:exon5:c.G604A:p.E202K,PRPSAP2:ENSCAFT00000028988.4:exon8:c.G724A:p.E242K,PRPSAP2:ENSCAFT00000070300.1:exon8:c.G724A:p.E242K,PRPSAP2:ENSCAFT00000071883.1:exon8:c.G724A:p.E242K,PRPSAP2:ENSCAFT00000084645.1:exon8:c.G724A:p.E242K	SRP159481	Mammary Tumor
SRR7780972-SRR7780975	chr1	110147262	110147262	G	A	POLR1G	Missense_Mutation	ENSCAFT00000007180.5	exon3	c.C1217T	p.P406L	SNP	exonic	POLR1G		nonsynonymous SNV	POLR1G:ENSCAFT00000007180.5:exon3:c.C1217T:p.P406L,POLR1G:ENSCAFT00000086161.1:exon3:c.C1217T:p.P406L	SRP159481	Mammary Tumor
SRR7780972-SRR7780975	chr10	277058	277058	C	T	DGKA	Missense_Mutation	ENSCAFT00000000131.4	exon4	c.C239T	p.T80M	SNP	exonic	DGKA		nonsynonymous SNV	DGKA:ENSCAFT00000000131.4:exon4:c.C239T:p.T80M,DGKA:ENSCAFT00000075807.1:exon4:c.C446T:p.T149M,DGKA:ENSCAFT00000083678.1:exon4:c.C446T:p.T149M,DGKA:ENSCAFT00000087894.1:exon4:c.C446T:p.T149M	SRP159481	Mammary Tumor
SRR7780972-SRR7780975	chr14	29415149	29415149	T	A	DGKB	Missense_Mutation	ENSCAFT00000003770.5	exon6	c.A533T	p.E178V	SNP	exonic	DGKB		nonsynonymous SNV	DGKB:ENSCAFT00000003770.5:exon6:c.A533T:p.E178V,DGKB:ENSCAFT00000062558.1:exon6:c.A533T:p.E178V,DGKB:ENSCAFT00000070637.1:exon6:c.A533T:p.E178V,DGKB:ENSCAFT00000075684.1:exon6:c.A413T:p.E138V,DGKB:ENSCAFT00000044090.3:exon7:c.A554T:p.E185V,DGKB:ENSCAFT00000048249.2:exon7:c.A554T:p.E185V,DGKB:ENSCAFT00000081355.1:exon7:c.A554T:p.E185V,DGKB:ENSCAFT00000081923.1:exon7:c.A554T:p.E185V	SRP159481	Mammary Tumor
SRR7780972-SRR7780975	chr18	55364723	55364723	C	T	TMEM132A	Missense_Mutation	ENSCAFT00000074887.1	exon9	c.G2518A	p.A840T	SNP	exonic	TMEM132A		nonsynonymous SNV	TMEM132A:ENSCAFT00000074887.1:exon9:c.G2518A:p.A840T,TMEM132A:ENSCAFT00000077440.1:exon9:c.G2545A:p.A849T,TMEM132A:ENSCAFT00000082096.1:exon9:c.G2590A:p.A864T,TMEM132A:ENSCAFT00000090766.1:exon10:c.G2737A:p.A913T,TMEM132A:ENSCAFT00000026016.5:exon11:c.G2287A:p.A763T,TMEM132A:ENSCAFT00000092061.1:exon11:c.G2191A:p.A731T,TMEM132A:ENSCAFT00000078541.1:exon13:c.G2521A:p.A841T	SRP159481	Mammary Tumor
SRR7780972-SRR7780975	chr2	30541853	30541853	C	T	UCN3	Missense_Mutation	ENSCAFT00000008473.2	exon1	c.G430A	p.A144T	SNP	exonic	UCN3		nonsynonymous SNV	UCN3:ENSCAFT00000008473.2:exon1:c.G430A:p.A144T	SRP159481	Mammary Tumor
SRR7780972-SRR7780975	chr2	51716620	51716620	G	T	ERBIN	Missense_Mutation	ENSCAFT00000044437.3	exon20	c.G3683T	p.S1228I	SNP	exonic	ERBIN		nonsynonymous SNV	ERBIN:ENSCAFT00000044437.3:exon20:c.G3683T:p.S1228I,ERBIN:ENSCAFT00000081329.1:exon20:c.G3683T:p.S1228I,ERBIN:ENSCAFT00000090282.1:exon20:c.G3683T:p.S1228I,ERBIN:ENSCAFT00000012081.5:exon21:c.G3431T:p.S1144I,ERBIN:ENSCAFT00000047275.2:exon21:c.G3431T:p.S1144I,ERBIN:ENSCAFT00000073196.1:exon21:c.G3431T:p.S1144I,ERBIN:ENSCAFT00000093769.1:exon21:c.G3431T:p.S1144I	SRP159481	Mammary Tumor
SRR7780972-SRR7780975	chr25	50241143	50241143	C	A	OR9S25	Missense_Mutation	ENSCAFT00000046843.2	exon2	c.C175A	p.L59M	SNP	exonic	OR9S25		nonsynonymous SNV	OR9S25:ENSCAFT00000046843.2:exon2:c.C175A:p.L59M	SRP159481	Mammary Tumor
SRR7780972-SRR7780975	chr27	38196218	38196218	C	T	GPR162	Missense_Mutation	ENSCAFT00000039809.3	exon4	c.G1583A	p.R528Q	SNP	exonic	GPR162		nonsynonymous SNV	GPR162:ENSCAFT00000039809.3:exon4:c.G1583A:p.R528Q,GPR162:ENSCAFT00000090240.1:exon4:c.G728A:p.R243Q	SRP159481	Mammary Tumor
SRR7780972-SRR7780975	chr3	72990099	72990099	C	G	RPL9	Missense_Mutation	ENSCAFT00000091960.1	exon1	c.C13G	p.L5V	SNP	exonic	RPL9		nonsynonymous SNV	RPL9:ENSCAFT00000091960.1:exon1:c.C13G:p.L5V,RPL9:ENSCAFT00000008062.4:exon2:c.C13G:p.L5V	SRP159481	Mammary Tumor
SRR7780972-SRR7780975	chr35	24033693	24033693	C	T	HFE	Missense_Mutation	ENSCAFT00000017387.4	exon2	c.C538T	p.R180C	SNP	exonic	HFE		nonsynonymous SNV	HFE:ENSCAFT00000017387.4:exon2:c.C538T:p.R180C,HFE:ENSCAFT00000059666.1:exon2:c.C538T:p.R180C,HFE:ENSCAFT00000059890.1:exon2:c.C97T:p.R33C,HFE:ENSCAFT00000070403.1:exon2:c.C538T:p.R180C,HFE:ENSCAFT00000077308.1:exon2:c.C538T:p.R180C,HFE:ENSCAFT00000088074.1:exon2:c.C538T:p.R180C	SRP159481	Mammary Tumor
SRR7780972-SRR7780975	chr36	11304612	11304612	C	A	SCN9A	Missense_Mutation	ENSCAFT00000085582.1	exon19	c.G3908T	p.W1303L	SNP	exonic	SCN9A		nonsynonymous SNV	SCN9A:ENSCAFT00000085582.1:exon19:c.G3908T:p.W1303L,SCN9A:ENSCAFT00000046546.3:exon20:c.G3755T:p.W1252L,SCN9A:ENSCAFT00000062692.1:exon20:c.G3986T:p.W1329L,SCN9A:ENSCAFT00000018336.3:exon21:c.G4142T:p.W1381L	SRP159481	Mammary Tumor
SRR7780972-SRR7780975	chr7	41849073	41849073	C	T	ARHGEF2	Missense_Mutation	ENSCAFT00000026745.4	exon20	c.C2663T	p.T888M	SNP	exonic	ARHGEF2		nonsynonymous SNV	ARHGEF2:ENSCAFT00000026745.4:exon20:c.C2663T:p.T888M,ARHGEF2:ENSCAFT00000064826.1:exon20:c.C2690T:p.T897M,ARHGEF2:ENSCAFT00000070937.1:exon21:c.C2855T:p.T952M,ARHGEF2:ENSCAFT00000043708.3:exon24:c.C3254T:p.T1085M,ARHGEF2:ENSCAFT00000060469.1:exon24:c.C3254T:p.T1085M	SRP159481	Mammary Tumor
SRR7780974-SRR7780977	chr11	66334964	66334964	G	A	SHOC1	Missense_Mutation	ENSCAFT00000004826.4	exon8	c.C716T	p.S239F	SNP	exonic	SHOC1		nonsynonymous SNV	SHOC1:ENSCAFT00000004826.4:exon8:c.C716T:p.S239F,SHOC1:ENSCAFT00000037679.4:exon8:c.C716T:p.S239F,SHOC1:ENSCAFT00000037683.4:exon8:c.C716T:p.S239F,SHOC1:ENSCAFT00000044041.3:exon8:c.C716T:p.S239F	SRP159481	Mammary Tumor
SRR7780974-SRR7780977	chr14	2072794	2072794	C	A	OR2L3	Missense_Mutation	ENSCAFT00000001934.1	exon1	c.C96A	p.F32L	SNP	exonic	OR2L3		nonsynonymous SNV	OR2L3:ENSCAFT00000001934.1:exon1:c.C96A:p.F32L	SRP159481	Mammary Tumor
SRR7780974-SRR7780977	chr17	39022459	39022459	C	G	POLR1A	Missense_Mutation	ENSCAFT00000012228.4	exon12	c.C1526G	p.A509G	SNP	exonic	POLR1A		nonsynonymous SNV	POLR1A:ENSCAFT00000012228.4:exon12:c.C1526G:p.A509G,POLR1A:ENSCAFT00000047500.3:exon12:c.C1526G:p.A509G,POLR1A:ENSCAFT00000070947.1:exon12:c.C1526G:p.A509G,POLR1A:ENSCAFT00000071612.1:exon12:c.C1526G:p.A509G	SRP159481	Mammary Tumor
SRR7780974-SRR7780977	chr25	32496736	32496736	T	C	NEFM	Missense_Mutation	ENSCAFT00000064488.1	exon1	c.A1835G	p.N612S	SNP	exonic	NEFM		nonsynonymous SNV	NEFM:ENSCAFT00000064488.1:exon1:c.A1835G:p.N612S,NEFM:ENSCAFT00000014336.5:exon2:c.A1166G:p.N389S	SRP159481	Mammary Tumor
SRR7780974-SRR7780977	chr28	710147	710147	G	A	WDFY4	Missense_Mutation	ENSCAFT00000010630.5	exon23	c.G4159A	p.A1387T	SNP	exonic	WDFY4		nonsynonymous SNV	WDFY4:ENSCAFT00000010630.5:exon23:c.G4159A:p.A1387T	SRP159481	Mammary Tumor
SRR7780974-SRR7780977	chr28	5446614	5446614	G	A	HTR7	Missense_Mutation	ENSCAFT00000011576.5	exon2	c.C572T	p.T191M	SNP	exonic	HTR7		nonsynonymous SNV	HTR7:ENSCAFT00000011576.5:exon2:c.C572T:p.T191M,HTR7:ENSCAFT00000047719.3:exon2:c.C572T:p.T191M	SRP159481	Mammary Tumor
SRR7780974-SRR7780977	chr3	61358310	61358310	G	A	ADD1	Missense_Mutation	ENSCAFT00000023513.4	exon13	c.C2000T	p.A667V	SNP	exonic	ADD1		nonsynonymous SNV	ADD1:ENSCAFT00000023513.4:exon13:c.C2000T:p.A667V,ADD1:ENSCAFT00000068822.1:exon15:c.C2252T:p.A751V,ADD1:ENSCAFT00000023515.4:exon16:c.C2213T:p.A738V,ADD1:ENSCAFT00000093308.1:exon16:c.C2330T:p.A777V	SRP159481	Mammary Tumor
SRR7780974-SRR7780977	chr3	70356267	70356267	G	T	CYTL1	Missense_Mutation	ENSCAFT00000024876.4	exon2	c.C193A	p.H65N	SNP	exonic	CYTL1		nonsynonymous SNV	CYTL1:ENSCAFT00000024876.4:exon2:c.C193A:p.H65N	SRP159481	Mammary Tumor
SRR7780974-SRR7780977	chr30	39181729	39181729	G	A	PEAK1	Missense_Mutation	ENSCAFT00000039159.3	exon3	c.G3554A	p.R1185Q	SNP	exonic	PEAK1		nonsynonymous SNV	PEAK1:ENSCAFT00000039159.3:exon3:c.G3554A:p.R1185Q	SRP159481	Mammary Tumor
SRR7780974-SRR7780977	chr34	12675674	12675674	A	G	PIK3CA	Missense_Mutation	ENSCAFT00000080543.1	exon20	c.A3140G	p.H1047R	SNP	exonic	PIK3CA		nonsynonymous SNV	PIK3CA:ENSCAFT00000080543.1:exon20:c.A3140G:p.H1047R	SRP159481	Mammary Tumor
SRR7780974-SRR7780977	chr4	43091578	43091578	G	A	SLIT3	Missense_Mutation	ENSCAFT00000026988.3	exon31	c.G3683A	p.C1228Y	SNP	exonic	SLIT3		nonsynonymous SNV	SLIT3:ENSCAFT00000026988.3:exon31:c.G3683A:p.C1228Y,SLIT3:ENSCAFT00000092459.1:exon35:c.G3953A:p.C1318Y	SRP159481	Mammary Tumor
SRR7780974-SRR7780977	chr5	31014263	31014263	C	T	WSCD1	Missense_Mutation	ENSCAFT00000024555.3	exon2	c.G314A	p.R105Q	SNP	exonic	WSCD1		nonsynonymous SNV	WSCD1:ENSCAFT00000024555.3:exon2:c.G314A:p.R105Q,WSCD1:ENSCAFT00000075863.1:exon2:c.G314A:p.R105Q	SRP159481	Mammary Tumor
SRR7780974-SRR7780977	chr7	53526840	53526840	T	A	FHOD3	Missense_Mutation	ENSCAFT00000049835.3	exon5	c.A604T	p.N202Y	SNP	exonic	FHOD3		nonsynonymous SNV	FHOD3:ENSCAFT00000049835.3:exon5:c.A604T:p.N202Y,FHOD3:ENSCAFT00000028200.5:exon16:c.A2854T:p.N952Y,FHOD3:ENSCAFT00000044593.3:exon17:c.A2905T:p.N969Y	SRP159481	Mammary Tumor
SRR7780974-SRR7780977	chr7	57720331	57720331	G	A	TRAPPC8	Missense_Mutation	ENSCAFT00000028645.4	exon18	c.G2578A	p.G860R	SNP	exonic	TRAPPC8		nonsynonymous SNV	TRAPPC8:ENSCAFT00000028645.4:exon18:c.G2578A:p.G860R,TRAPPC8:ENSCAFT00000045046.3:exon19:c.G2599A:p.G867R	SRP159481	Mammary Tumor
SRR7780983-SRR7780982	chr1	117586650	117586650	A	G	ZNF792	Missense_Mutation	ENSCAFT00000046814.2	exon3	c.A800G	p.N267S	SNP	exonic	ZNF792		nonsynonymous SNV	ZNF792:ENSCAFT00000046814.2:exon3:c.A800G:p.N267S	SRP159481	Mammary Tumor
SRR7780983-SRR7780982	chr15	22838115	22838115	A	G	PTPRQ	Missense_Mutation	ENSCAFT00000009346.5	exon7	c.A1009G	p.T337A	SNP	exonic	PTPRQ		nonsynonymous SNV	PTPRQ:ENSCAFT00000009346.5:exon7:c.A1009G:p.T337A,PTPRQ:ENSCAFT00000009347.4:exon7:c.A952G:p.T318A	SRP159481	Mammary Tumor
SRR7780983-SRR7780982	chr17	8265664	8265664	C	A	GREB1	Missense_Mutation	ENSCAFT00000005749.4	exon4	c.C605A	p.T202N	SNP	exonic	GREB1		nonsynonymous SNV	GREB1:ENSCAFT00000005749.4:exon4:c.C605A:p.T202N,GREB1:ENSCAFT00000050023.3:exon4:c.C605A:p.T202N,GREB1:ENSCAFT00000060971.1:exon4:c.C605A:p.T202N,GREB1:ENSCAFT00000067960.1:exon4:c.C605A:p.T202N,GREB1:ENSCAFT00000073991.1:exon4:c.C365A:p.T122N,GREB1:ENSCAFT00000074904.1:exon4:c.C605A:p.T202N,GREB1:ENSCAFT00000081703.1:exon4:c.C605A:p.T202N	SRP159481	Mammary Tumor
SRR7780983-SRR7780982	chr18	37846345	37846345	G	A	LPXN	Missense_Mutation	ENSCAFT00000091989.1	exon6	c.G802A	p.V268I	SNP	exonic	LPXN		nonsynonymous SNV	LPXN:ENSCAFT00000091989.1:exon6:c.G802A:p.V268I,LPXN:ENSCAFT00000012313.4:exon8:c.G862A:p.V288I,LPXN:ENSCAFT00000070922.1:exon8:c.G865A:p.V289I	SRP159481	Mammary Tumor
SRR7780983-SRR7780982	chr2	73209993	73209993	T	C	NUDC	Missense_Mutation	ENSCAFT00000019458.4	exon5	c.A548G	p.D183G	SNP	exonic	NUDC		nonsynonymous SNV	NUDC:ENSCAFT00000019458.4:exon5:c.A548G:p.D183G	SRP159481	Mammary Tumor
SRR7780983-SRR7780982	chr20	40116006	40116006	A	C	QRICH1	Missense_Mutation	ENSCAFT00000018917.4	exon2	c.A766C	p.T256P	SNP	exonic	QRICH1		nonsynonymous SNV	QRICH1:ENSCAFT00000018917.4:exon2:c.A766C:p.T256P	SRP159481	Mammary Tumor
SRR7780983-SRR7780982	chr24	36397464	36397464	G	A	SLC9A8	Missense_Mutation	ENSCAFT00000018193.4	exon6	c.G472A	p.A158T	SNP	exonic	SLC9A8		nonsynonymous SNV	SLC9A8:ENSCAFT00000018193.4:exon6:c.G472A:p.A158T,SLC9A8:ENSCAFT00000085784.1:exon6:c.G472A:p.A158T	SRP159481	Mammary Tumor
SRR7780983-SRR7780982	chr25	40124406	40124406	G	A	MFF	Missense_Mutation	ENSCAFT00000016591.4	exon3	c.G265A	p.G89R	SNP	exonic	MFF		nonsynonymous SNV	MFF:ENSCAFT00000016591.4:exon3:c.G265A:p.G89R,MFF:ENSCAFT00000059660.1:exon3:c.G415A:p.G139R,MFF:ENSCAFT00000071559.1:exon3:c.G415A:p.G139R,MFF:ENSCAFT00000083603.1:exon3:c.G415A:p.G139R,MFF:ENSCAFT00000016584.5:exon6:c.G493A:p.G165R,MFF:ENSCAFT00000060925.1:exon6:c.G493A:p.G165R,MFF:ENSCAFT00000062402.1:exon6:c.G493A:p.G165R,MFF:ENSCAFT00000079962.1:exon6:c.G493A:p.G165R	SRP159481	Mammary Tumor
SRR7780983-SRR7780982	chr27	22261798	22261798	G	A	KRAS	Missense_Mutation	ENSCAFT00000010525.4	exon2	c.G317A	p.G106D	SNP	exonic	KRAS		nonsynonymous SNV	KRAS:ENSCAFT00000010525.4:exon2:c.G317A:p.G106D,KRAS:ENSCAFT00000093055.1:exon2:c.G317A:p.G106D	SRP159481	Mammary Tumor
SRR7780983-SRR7780982	chr34	12675674	12675674	A	G	PIK3CA	Missense_Mutation	ENSCAFT00000080543.1	exon20	c.A3140G	p.H1047R	SNP	exonic	PIK3CA		nonsynonymous SNV	PIK3CA:ENSCAFT00000080543.1:exon20:c.A3140G:p.H1047R	SRP159481	Mammary Tumor
SRR7780983-SRR7780982	chr8	71822260	71822260	C	T	KIF26A	Missense_Mutation	ENSCAFT00000029108.5	exon12	c.C2113T	p.P705S	SNP	exonic	KIF26A		nonsynonymous SNV	KIF26A:ENSCAFT00000029108.5:exon12:c.C2113T:p.P705S	SRP159481	Mammary Tumor
SRR7780983-SRR7780982	chr11	54929025	54929025	C	T	TSTD2	Missense_Mutation	ENSCAFT00000003846.4	exon4	c.G545A	p.R182H	SNP	exonic	TSTD2		nonsynonymous SNV	TSTD2:ENSCAFT00000003846.4:exon4:c.G545A:p.R182H,TSTD2:ENSCAFT00000082919.1:exon4:c.G545A:p.R182H	SRP159481	Mammary Tumor
SRR7780985-SRR7780984	chr11	26031138	26031138	C	T	REEP2	Missense_Mutation	ENSCAFT00000001935.3	exon7	c.C589T	p.R197W	SNP	exonic	REEP2		nonsynonymous SNV	REEP2:ENSCAFT00000001935.3:exon7:c.C589T:p.R197W,REEP2:ENSCAFT00000082641.1:exon7:c.C562T:p.R188W	SRP159481	Mammary Tumor
SRR7780985-SRR7780984	chr18	13338187	13338187	G	T	COG5	Missense_Mutation	ENSCAFT00000006325.5	exon22	c.G2905T	p.V969L	SNP	exonic	COG5		nonsynonymous SNV	COG5:ENSCAFT00000006325.5:exon22:c.G2905T:p.V969L	SRP159481	Mammary Tumor
SRR7780985-SRR7780984	chr26	37886012	37886012	C	A	PTEN	Missense_Mutation	ENSCAFT00000024821.4	exon4	c.C180A	p.D60E	SNP	exonic	PTEN		nonsynonymous SNV	PTEN:ENSCAFT00000024821.4:exon4:c.C180A:p.D60E,PTEN:ENSCAFT00000087317.1:exon8:c.C276A:p.D92E	SRP159481	Mammary Tumor
SRR7780985-SRR7780984	chr32	33094546	33094546	G	A	ANK2	Missense_Mutation	ENSCAFT00000044958.3	exon28	c.G3185A	p.R1062H	SNP	exonic	ANK2		nonsynonymous SNV	ANK2:ENSCAFT00000044958.3:exon28:c.G3185A:p.R1062H,ANK2:ENSCAFT00000062885.1:exon28:c.G3185A:p.R1062H,ANK2:ENSCAFT00000044934.3:exon29:c.G3158A:p.R1053H	SRP159481	Mammary Tumor
SRR7780985-SRR7780984	chr34	12675674	12675674	A	G	PIK3CA	Missense_Mutation	ENSCAFT00000080543.1	exon20	c.A3140G	p.H1047R	SNP	exonic	PIK3CA		nonsynonymous SNV	PIK3CA:ENSCAFT00000080543.1:exon20:c.A3140G:p.H1047R	SRP159481	Mammary Tumor
SRR7780985-SRR7780984	chr1	121877061	121877061	T	C	VSTM2B	Missense_Mutation	ENSCAFT00000012197.4	exon3	c.A461G	p.H154R	SNP	exonic	VSTM2B		nonsynonymous SNV	VSTM2B:ENSCAFT00000012197.4:exon3:c.A461G:p.H154R,VSTM2B:ENSCAFT00000085886.1:exon3:c.A662G:p.H221R,VSTM2B:ENSCAFT00000071234.1:exon4:c.A569G:p.H190R	SRP159481	Mammary Tumor
SRR7780985-SRR7780984	chr1	121877065	121877065	T	C	VSTM2B	Missense_Mutation	ENSCAFT00000012197.4	exon3	c.A457G	p.S153G	SNP	exonic	VSTM2B		nonsynonymous SNV	VSTM2B:ENSCAFT00000012197.4:exon3:c.A457G:p.S153G,VSTM2B:ENSCAFT00000085886.1:exon3:c.A658G:p.S220G,VSTM2B:ENSCAFT00000071234.1:exon4:c.A565G:p.S189G	SRP159481	Mammary Tumor
SRR7780985-SRR7780984	chr27	5982044	5982044	A	T	OR8S11	Missense_Mutation	ENSCAFT00000071361.1	exon1	c.T806A	p.V269D	SNP	exonic	OR8S11		nonsynonymous SNV	OR8S11:ENSCAFT00000071361.1:exon1:c.T806A:p.V269D	SRP159481	Mammary Tumor
SRR7780985-SRR7780984	chr28	11520528	11520528	G	A	PYROXD2	Missense_Mutation	ENSCAFT00000014887.3	exon15	c.C1544T	p.P515L	SNP	exonic	PYROXD2		nonsynonymous SNV	PYROXD2:ENSCAFT00000014887.3:exon15:c.C1544T:p.P515L	SRP159481	Mammary Tumor
SRR7780989-SRR7780988	chr1	4228183	4228183	C	T	TSHZ1	Missense_Mutation	ENSCAFT00000036397.2	exon2	c.G1324A	p.G442S	SNP	exonic	TSHZ1		nonsynonymous SNV	TSHZ1:ENSCAFT00000036397.2:exon2:c.G1324A:p.G442S	SRP159481	Mammary Tumor
SRR7780989-SRR7780988	chr13	35115041	35115041	C	T	TRAPPC9	Missense_Mutation	ENSCAFT00000001830.4	exon1	c.G454A	p.E152K	SNP	exonic	TRAPPC9		nonsynonymous SNV	TRAPPC9:ENSCAFT00000001830.4:exon1:c.G454A:p.E152K	SRP159481	Mammary Tumor
SRR7780989-SRR7780988	chr14	53182097	53182097	A	C	PPP1R3A	Missense_Mutation	ENSCAFT00000005338.2	exon4	c.T1162G	p.F388V	SNP	exonic	PPP1R3A		nonsynonymous SNV	PPP1R3A:ENSCAFT00000005338.2:exon4:c.T1162G:p.F388V,PPP1R3A:ENSCAFT00000069884.1:exon4:c.T1162G:p.F388V	SRP159481	Mammary Tumor
SRR7780989-SRR7780988	chr15	16844266	16844266	G	A	TIE1	Missense_Mutation	ENSCAFT00000078021.1	exon14	c.C2323T	p.R775W	SNP	exonic	TIE1		nonsynonymous SNV	TIE1:ENSCAFT00000078021.1:exon14:c.C2323T:p.R775W,TIE1:ENSCAFT00000008550.4:exon15:c.C2461T:p.R821W	SRP159481	Mammary Tumor
SRR7780989-SRR7780988	chr27	8463357	8463357	G	C	ARID2	Missense_Mutation	ENSCAFT00000014865.4	exon15	c.C2150G	p.T717R	SNP	exonic	ARID2		nonsynonymous SNV	ARID2:ENSCAFT00000014865.4:exon15:c.C2150G:p.T717R,ARID2:ENSCAFT00000073118.1:exon15:c.C2150G:p.T717R,ARID2:ENSCAFT00000084222.1:exon15:c.C2150G:p.T717R,ARID2:ENSCAFT00000088050.1:exon15:c.C980G:p.T327R,ARID2:ENSCAFT00000044680.3:exon17:c.C2147G:p.T716R	SRP159481	Mammary Tumor
SRR7780989-SRR7780988	chr27	30371052	30371052	G	A	MGST1	Missense_Mutation	ENSCAFT00000020041.4	exon4	c.C392T	p.A131V	SNP	exonic	MGST1		nonsynonymous SNV	MGST1:ENSCAFT00000020041.4:exon4:c.C392T:p.A131V,MGST1:ENSCAFT00000073139.1:exon4:c.C359T:p.A120V	SRP159481	Mammary Tumor
SRR7780989-SRR7780988	chr3	48767229	48767229	A	T	SV2B	Missense_Mutation	ENSCAFT00000017951.4	exon2	c.T422A	p.L141H	SNP	exonic	SV2B		nonsynonymous SNV	SV2B:ENSCAFT00000017951.4:exon2:c.T422A:p.L141H	SRP159481	Mammary Tumor
SRR7780989-SRR7780988	chr3	55051039	55051039	C	T	BNC1	Missense_Mutation	ENSCAFT00000020969.3	exon3	c.G251A	p.R84Q	SNP	exonic	BNC1		nonsynonymous SNV	BNC1:ENSCAFT00000020969.3:exon3:c.G251A:p.R84Q,BNC1:ENSCAFT00000061527.1:exon3:c.G251A:p.R84Q,BNC1:ENSCAFT00000076831.1:exon3:c.G251A:p.R84Q,BNC1:ENSCAFT00000084796.1:exon3:c.G320A:p.R107Q	SRP159481	Mammary Tumor
SRR7780989-SRR7780988	chr33	24904147	24904147	T	G	HCLS1	Missense_Mutation	ENSCAFT00000018370.4	exon8	c.A638C	p.N213T	SNP	exonic	HCLS1		nonsynonymous SNV	HCLS1:ENSCAFT00000018370.4:exon8:c.A638C:p.N213T	SRP159481	Mammary Tumor
SRR7780989-SRR7780988	chr34	8284532	8284532	G	A	ADAMTS16	Missense_Mutation	ENSCAFT00000063095.1	exon8	c.C1261T	p.P421S	SNP	exonic	ADAMTS16		nonsynonymous SNV	ADAMTS16:ENSCAFT00000063095.1:exon8:c.C1261T:p.P421S,ADAMTS16:ENSCAFT00000016528.4:exon9:c.C1192T:p.P398S,ADAMTS16:ENSCAFT00000071762.1:exon9:c.C1192T:p.P398S,ADAMTS16:ENSCAFT00000078477.1:exon9:c.C1192T:p.P398S	SRP159481	Mammary Tumor
SRR7780989-SRR7780988	chr38	21208781	21208781	C	G	MPZ	Missense_Mutation	ENSCAFT00000020580.4	exon4	c.C707G	p.T236S	SNP	exonic	MPZ		nonsynonymous SNV	MPZ:ENSCAFT00000020580.4:exon4:c.C707G:p.T236S	SRP159481	Mammary Tumor
SRR7780989-SRR7780988	chr4	35314605	35314605	A	G	MCC	Missense_Mutation	ENSCAFT00000025788.4	exon15	c.T2134C	p.F712L	SNP	exonic	MCC		nonsynonymous SNV	MCC:ENSCAFT00000025788.4:exon15:c.T2134C:p.F712L,MCC:ENSCAFT00000068936.1:exon16:c.T2281C:p.F761L,MCC:ENSCAFT00000090841.1:exon16:c.T2278C:p.F760L,MCC:ENSCAFT00000092975.1:exon16:c.T2092C:p.F698L	SRP159481	Mammary Tumor
SRR7780989-SRR7780988	chr5	15245299	15245299	C	T	KMT2A	Missense_Mutation	ENSCAFT00000067894.1	exon19	c.G5240A	p.G1747D	SNP	exonic	KMT2A		nonsynonymous SNV	KMT2A:ENSCAFT00000067894.1:exon19:c.G5240A:p.G1747D,KMT2A:ENSCAFT00000020182.7:exon20:c.G5363A:p.G1788D	SRP159481	Mammary Tumor
SRR7780989-SRR7780988	chr5	32563916	32563916	C	T	TP53	Missense_Mutation	ENSCAFT00000086831.1	exon3	c.G416A	p.R139H	SNP	exonic	TP53		nonsynonymous SNV	TP53:ENSCAFT00000086831.1:exon3:c.G416A:p.R139H,TP53:ENSCAFT00000026465.4:exon5:c.G485A:p.R162H,TP53:ENSCAFT00000081814.1:exon5:c.G677A:p.R226H	SRP159481	Mammary Tumor
SRR7780989-SRR7780988	chr5	78456312	78456312	T	C	ZFHX3	Missense_Mutation	ENSCAFT00000032240.5	exon9	c.A9853G	p.T3285A	SNP	exonic	ZFHX3		nonsynonymous SNV	ZFHX3:ENSCAFT00000032240.5:exon9:c.A9853G:p.T3285A	SRP159481	Mammary Tumor
SRR7780989-SRR7780988	chr5	81239582	81239582	G	T	SLC7A6	Missense_Mutation	ENSCAFT00000032359.4	exon4	c.C892A	p.L298I	SNP	exonic	SLC7A6		nonsynonymous SNV	SLC7A6:ENSCAFT00000032359.4:exon4:c.C892A:p.L298I	SRP159481	Mammary Tumor
SRR7780989-SRR7780988	chr6	39815102	39815102	C	T	CHTF18	Missense_Mutation	ENSCAFT00000031175.4	exon1	c.G232A	p.G78R	SNP	exonic	CHTF18		nonsynonymous SNV	ENSCAFG00000019611.4:ENSCAFT00000031175.4:exon1:c.G232A:p.G78R,ENSCAFG00000019611.4:ENSCAFT00000064756.1:exon1:c.G232A:p.G78R,ENSCAFG00000019611.4:ENSCAFT00000086476.1:exon1:c.G232A:p.G78R,ENSCAFG00000019611.4:ENSCAFT00000088984.1:exon1:c.G232A:p.G78R,ENSCAFG00000019614.3:ENSCAFT00000031177.3:exon2:c.C556T:p.P186S,ENSCAFG00000019614.3:ENSCAFT00000070184.1:exon2:c.C556T:p.P186S,ENSCAFG00000019614.…	SRP159481	Mammary Tumor
SRR7780989-SRR7780988	chr7	45465286	45465286	G	A	SLC14A2	Missense_Mutation	ENSCAFT00000080166.1	exon9	c.C1370T	p.P457L	SNP	exonic	SLC14A2		nonsynonymous SNV	SLC14A2:ENSCAFT00000080166.1:exon9:c.C1370T:p.P457L,SLC14A2:ENSCAFT00000028026.3:exon10:c.C1382T:p.P461L	SRP159481	Mammary Tumor
SRR7780989-SRR7780988	chr9	19077850	19077850	C	T	GRN	Missense_Mutation	ENSCAFT00000022483.4	exon11	c.G1628A	p.R543H	SNP	exonic	GRN		nonsynonymous SNV	GRN:ENSCAFT00000022483.4:exon11:c.G1628A:p.R543H	SRP159481	Mammary Tumor
SRR7780989-SRR7780988	chr9	24085799	24085799	G	A	TBX21	Missense_Mutation	ENSCAFT00000026451.5	exon6	c.G1592A	p.S531N	SNP	exonic	TBX21		nonsynonymous SNV	TBX21:ENSCAFT00000026451.5:exon6:c.G1592A:p.S531N	SRP159481	Mammary Tumor
SRR7780992-SRR7780993	chr12	4949116	4949116	C	T	SRPK1	Missense_Mutation	ENSCAFT00000086559.1	exon12	c.G2200A	p.A734T	SNP	exonic	SRPK1		nonsynonymous SNV	SRPK1:ENSCAFT00000086559.1:exon12:c.G2200A:p.A734T,SRPK1:ENSCAFT00000065975.1:exon13:c.G2287A:p.A763T,SRPK1:ENSCAFT00000002114.4:exon14:c.G2395A:p.A799T,SRPK1:ENSCAFT00000074303.1:exon14:c.G2395A:p.A799T,SRPK1:ENSCAFT00000074503.1:exon14:c.G2395A:p.A799T,SRPK1:ENSCAFT00000077998.1:exon14:c.G2395A:p.A799T,SRPK1:ENSCAFT00000082922.1:exon14:c.G2395A:p.A799T	SRP159481	Mammary Tumor
SRR7780992-SRR7780993	chr16	18080999	18080999	G	A	PAXIP1	Missense_Mutation	ENSCAFT00000070096.1	exon9	c.C2194T	p.P732S	SNP	exonic	PAXIP1		nonsynonymous SNV	PAXIP1:ENSCAFT00000070096.1:exon9:c.C2194T:p.P732S,PAXIP1:ENSCAFT00000008164.4:exon11:c.C2302T:p.P768S,PAXIP1:ENSCAFT00000068905.1:exon11:c.C2023T:p.P675S	SRP159481	Mammary Tumor
SRR7780992-SRR7780993	chr33	25566485	25566485	A	T	KPNA1	Missense_Mutation	ENSCAFT00000018942.4	exon14	c.T1613A	p.L538H	SNP	exonic	KPNA1		nonsynonymous SNV	KPNA1:ENSCAFT00000018942.4:exon14:c.T1613A:p.L538H	SRP159481	Mammary Tumor
SRR7780992-SRR7780993	chr34	12675674	12675674	A	G	PIK3CA	Missense_Mutation	ENSCAFT00000080543.1	exon20	c.A3140G	p.H1047R	SNP	exonic	PIK3CA		nonsynonymous SNV	PIK3CA:ENSCAFT00000080543.1:exon20:c.A3140G:p.H1047R	SRP159481	Mammary Tumor
SRR7780992-SRR7780993	chr4	69947672	69947672	A	G	RICTOR	Missense_Mutation	ENSCAFT00000029593.4	exon3	c.A278G	p.D93G	SNP	exonic	RICTOR		nonsynonymous SNV	RICTOR:ENSCAFT00000029593.4:exon3:c.A278G:p.D93G,RICTOR:ENSCAFT00000029595.5:exon3:c.A278G:p.D93G	SRP159481	Mammary Tumor
SRR7780992-SRR7780993	chr7	41143089	41143089	C	T	NTRK1	Missense_Mutation	ENSCAFT00000072804.1	exon12	c.G2318A	p.R773H	SNP	exonic	NTRK1		nonsynonymous SNV	NTRK1:ENSCAFT00000072804.1:exon12:c.G2318A:p.R773H,NTRK1:ENSCAFT00000061146.1:exon13:c.G2045A:p.R682H,NTRK1:ENSCAFT00000026176.4:exon14:c.G2027A:p.R676H,NTRK1:ENSCAFT00000090578.1:exon14:c.G2318A:p.R773H	SRP159481	Mammary Tumor
SRR7780992-SRR7780993	chr7	41250796	41250796	C	G	MRPL24	Missense_Mutation	ENSCAFT00000026511.3	exon3	c.C355G	p.Q119E	SNP	exonic	MRPL24		nonsynonymous SNV	MRPL24:ENSCAFT00000026511.3:exon3:c.C355G:p.Q119E	SRP159481	Mammary Tumor
SRR7780994-SRR7780995	chr11	40369624	40369624	G	T	FOCAD	Missense_Mutation	ENSCAFT00000079827.1	exon7	c.G753T	p.L251F	SNP	exonic	FOCAD		nonsynonymous SNV	FOCAD:ENSCAFT00000079827.1:exon7:c.G753T:p.L251F,FOCAD:ENSCAFT00000069085.1:exon9:c.G897T:p.L299F,FOCAD:ENSCAFT00000039148.3:exon10:c.G999T:p.L333F,FOCAD:ENSCAFT00000066207.1:exon10:c.G999T:p.L333F,FOCAD:ENSCAFT00000077254.1:exon10:c.G999T:p.L333F,FOCAD:ENSCAFT00000086775.1:exon10:c.G999T:p.L333F,FOCAD:ENSCAFT00000090257.1:exon10:c.G999T:p.L333F,FOCAD:ENSCAFT00000091171.1:exon10:c.G999T:p.L333F	SRP159481	Mammary Tumor
SRR7780994-SRR7780995	chr11	52190541	52190541	T	G	SIT1	Missense_Mutation	ENSCAFT00000003271.3	exon3	c.A424C	p.M142L	SNP	exonic	SIT1		nonsynonymous SNV	SIT1:ENSCAFT00000003271.3:exon3:c.A424C:p.M142L,SIT1:ENSCAFT00000067163.1:exon3:c.A427C:p.M143L,SIT1:ENSCAFT00000067631.1:exon3:c.A427C:p.M143L	SRP159481	Mammary Tumor
SRR7780994-SRR7780995	chr13	29242170	29242170	T	G	TMEM71	Missense_Mutation	ENSCAFT00000001704.4	exon5	c.A413C	p.D138A	SNP	exonic	TMEM71		nonsynonymous SNV	TMEM71:ENSCAFT00000001704.4:exon5:c.A413C:p.D138A,TMEM71:ENSCAFT00000044727.3:exon5:c.A377C:p.D126A,TMEM71:ENSCAFT00000048732.3:exon5:c.A413C:p.D138A,TMEM71:ENSCAFT00000064681.1:exon5:c.A413C:p.D138A	SRP159481	Mammary Tumor
SRR7780994-SRR7780995	chr18	12652865	12652865	A	G	LAMB1	Missense_Mutation	ENSCAFT00000006148.4	exon9	c.A1120G	p.T374A	SNP	exonic	LAMB1		nonsynonymous SNV	LAMB1:ENSCAFT00000006148.4:exon9:c.A1120G:p.T374A,LAMB1:ENSCAFT00000087385.1:exon12:c.A1453G:p.T485A	SRP159481	Mammary Tumor
SRR7780994-SRR7780995	chr26	6519156	6519156	G	A	PITPNM2	Missense_Mutation	ENSCAFT00000012204.4	exon23	c.G3559A	p.G1187S	SNP	exonic	PITPNM2		nonsynonymous SNV	PITPNM2:ENSCAFT00000012204.4:exon23:c.G3559A:p.G1187S,PITPNM2:ENSCAFT00000012218.5:exon23:c.G3571A:p.G1191S,PITPNM2:ENSCAFT00000062937.1:exon24:c.G3721A:p.G1241S	SRP159481	Mammary Tumor
SRR7780994-SRR7780995	chr30	18227386	18227386	C	A	FAM214A	Missense_Mutation	ENSCAFT00000086286.1	exon9	c.G2705T	p.G902V	SNP	exonic	FAM214A		nonsynonymous SNV	FAM214A:ENSCAFT00000086286.1:exon9:c.G2705T:p.G902V,FAM214A:ENSCAFT00000025134.4:exon10:c.G2867T:p.G956V,FAM214A:ENSCAFT00000047700.3:exon10:c.G2864T:p.G955V,FAM214A:ENSCAFT00000077951.1:exon10:c.G2888T:p.G963V,FAM214A:ENSCAFT00000084034.1:exon10:c.G2885T:p.G962V	SRP159481	Mammary Tumor
SRR7780994-SRR7780995	chr4	34234328	34234328	T	C	WAPL	Missense_Mutation	ENSCAFT00000093877.1	exon8	c.A484G	p.I162V	SNP	exonic	WAPL		nonsynonymous SNV	WAPL:ENSCAFT00000093877.1:exon8:c.A484G:p.I162V,WAPL:ENSCAFT00000069430.1:exon11:c.A2320G:p.I774V,WAPL:ENSCAFT00000025322.5:exon12:c.A2821G:p.I941V,WAPL:ENSCAFT00000025315.4:exon13:c.A2893G:p.I965V,WAPL:ENSCAFT00000025316.5:exon13:c.A2974G:p.I992V	SRP159481	Mammary Tumor
SRR7780994-SRR7780995	chr5	62657211	62657211	G	A	SPSB1	Missense_Mutation	ENSCAFT00000031375.4	exon2	c.G650A	p.R217Q	SNP	exonic	SPSB1		nonsynonymous SNV	SPSB1:ENSCAFT00000031375.4:exon2:c.G650A:p.R217Q,SPSB1:ENSCAFT00000062420.1:exon2:c.G665A:p.R222Q,SPSB1:ENSCAFT00000079983.1:exon2:c.G443A:p.R148Q	SRP159481	Mammary Tumor
SRR7780994-SRR7780995	chr6	56757521	56757521	G	A	BTBD8	Missense_Mutation	ENSCAFT00000086838.1	exon6	c.C3302T	p.A1101V	SNP	exonic	BTBD8		nonsynonymous SNV	BTBD8:ENSCAFT00000086838.1:exon6:c.C3302T:p.A1101V,BTBD8:ENSCAFT00000082416.1:exon17:c.C4754T:p.A1585V,BTBD8:ENSCAFT00000032101.4:exon18:c.C4952T:p.A1651V,BTBD8:ENSCAFT00000080988.1:exon22:c.C5543T:p.A1848V	SRP159481	Mammary Tumor
SRR7780996-SRR7780997	chr1	111816975	111816975	G	A	CEACAM28	Missense_Mutation	ENSCAFT00000007721.5	exon3	c.G555A	p.M185I	SNP	exonic	CEACAM28		nonsynonymous SNV	CEACAM28:ENSCAFT00000007721.5:exon3:c.G555A:p.M185I,CEACAM28:ENSCAFT00000045512.3:exon3:c.G555A:p.M185I,CEACAM28:ENSCAFT00000046568.2:exon3:c.G555A:p.M185I	SRP159481	Mammary Tumor
SRR7780996-SRR7780997	chr18	38022242	38022242	C	T	OR5B3	Missense_Mutation	ENSCAFT00000049138.1	exon1	c.C419T	p.A140V	SNP	exonic	OR5B3		nonsynonymous SNV	OR5B3:ENSCAFT00000049138.1:exon1:c.C419T:p.A140V	SRP159481	Mammary Tumor
SRR7780996-SRR7780997	chr2	84566416	84566416	C	T	FBXO2	Missense_Mutation	ENSCAFT00000007408.4	exon2	c.C196T	p.P66S	SNP	exonic	FBXO2		nonsynonymous SNV	FBXO2:ENSCAFT00000007408.4:exon2:c.C196T:p.P66S,FBXO2:ENSCAFT00000059684.1:exon2:c.C184T:p.P62S,FBXO2:ENSCAFT00000070437.1:exon2:c.C232T:p.P78S,FBXO2:ENSCAFT00000073151.1:exon2:c.C259T:p.P87S	SRP159481	Mammary Tumor
SRR7780996-SRR7780997	chr28	31795619	31795619	C	G	TACC2	Missense_Mutation	ENSCAFT00000019866.4	exon3	c.C1691G	p.A564G	SNP	exonic	TACC2		nonsynonymous SNV	TACC2:ENSCAFT00000019866.4:exon3:c.C1691G:p.A564G,TACC2:ENSCAFT00000064383.1:exon3:c.C1706G:p.A569G,TACC2:ENSCAFT00000047632.3:exon4:c.C1766G:p.A589G,TACC2:ENSCAFT00000066256.1:exon4:c.C1766G:p.A589G,TACC2:ENSCAFT00000081548.1:exon4:c.C1766G:p.A589G,TACC2:ENSCAFT00000084041.1:exon4:c.C1766G:p.A589G	SRP159481	Mammary Tumor
SRR7780996-SRR7780997	chr31	21248384	21248384	C	T	GABPA	Missense_Mutation	ENSCAFT00000013519.4	exon11	c.C1325T	p.A442V	SNP	exonic	GABPA		nonsynonymous SNV	GABPA:ENSCAFT00000013519.4:exon11:c.C1325T:p.A442V	SRP159481	Mammary Tumor
SRR7780996-SRR7780997	chr35	10563426	10563426	C	A	GCM2	Missense_Mutation	ENSCAFT00000015478.1	exon4	c.G528T	p.K176N	SNP	exonic	GCM2		nonsynonymous SNV	GCM2:ENSCAFT00000015478.1:exon4:c.G528T:p.K176N	SRP159481	Mammary Tumor
SRR7780996-SRR7780997	chr37	26140301	26140301	C	A	SLC4A3	Missense_Mutation	ENSCAFT00000007465.4	exon2	c.C313A	p.P105T	SNP	exonic	SLC4A3		nonsynonymous SNV	SLC4A3:ENSCAFT00000007465.4:exon2:c.C313A:p.P105T,SLC4A3:ENSCAFT00000024905.6:exon6:c.C934A:p.P312T,SLC4A3:ENSCAFT00000092653.1:exon6:c.C727A:p.P243T,SLC4A3:ENSCAFT00000077817.1:exon7:c.C934A:p.P312T	SRP159481	Mammary Tumor
SRR7780996-SRR7780997	chr5	64217477	64217477	T	A	ANKRD11	Missense_Mutation	ENSCAFT00000031567.5	exon9	c.T1928A	p.L643H	SNP	exonic	ANKRD11		nonsynonymous SNV	ANKRD11:ENSCAFT00000031567.5:exon9:c.T1928A:p.L643H,ANKRD11:ENSCAFT00000048247.3:exon9:c.T1928A:p.L643H,ANKRD11:ENSCAFT00000063305.1:exon9:c.T1928A:p.L643H,ANKRD11:ENSCAFT00000070213.1:exon9:c.T1928A:p.L643H,ANKRD11:ENSCAFT00000079538.1:exon9:c.T2030A:p.L677H	SRP159481	Mammary Tumor
SRR7780996-SRR7780997	chr7	36667812	36667812	C	T	SMYD3	Missense_Mutation	ENSCAFT00000043777.3	exon10	c.G1051A	p.G351R	SNP	exonic	SMYD3		nonsynonymous SNV	SMYD3:ENSCAFT00000043777.3:exon10:c.G1051A:p.G351R	SRP159481	Mammary Tumor
SRR7780996-SRR7780997	chr8	43901277	43901277	C	T	SLC8A3	Missense_Mutation	ENSCAFT00000026313.4	exon1	c.G1777A	p.E593K	SNP	exonic	SLC8A3		nonsynonymous SNV	SLC8A3:ENSCAFT00000026313.4:exon1:c.G1777A:p.E593K,SLC8A3:ENSCAFT00000059986.1:exon3:c.G1714A:p.E572K,SLC8A3:ENSCAFT00000067732.1:exon3:c.G1714A:p.E572K,SLC8A3:ENSCAFT00000085522.1:exon3:c.G1714A:p.E572K,SLC8A3:ENSCAFT00000088697.1:exon3:c.G1714A:p.E572K	SRP159481	Mammary Tumor
SRR7780996-SRR7780997	chr9	33760400	33760400	C	A	SMG8	Missense_Mutation	ENSCAFT00000027884.4	exon1	c.C1269A	p.S423R	SNP	exonic	SMG8		nonsynonymous SNV	SMG8:ENSCAFT00000027884.4:exon1:c.C1269A:p.S423R,SMG8:ENSCAFT00000070589.1:exon1:c.C1269A:p.S423R	SRP159481	Mammary Tumor
SRR7781000-SRR7781001	chr1	121877061	121877061	T	C	VSTM2B	Missense_Mutation	ENSCAFT00000012197.4	exon3	c.A461G	p.H154R	SNP	exonic	VSTM2B		nonsynonymous SNV	VSTM2B:ENSCAFT00000012197.4:exon3:c.A461G:p.H154R,VSTM2B:ENSCAFT00000085886.1:exon3:c.A662G:p.H221R,VSTM2B:ENSCAFT00000071234.1:exon4:c.A569G:p.H190R	SRP159481	Mammary Tumor
SRR7781000-SRR7781001	chr1	121877065	121877065	T	C	VSTM2B	Missense_Mutation	ENSCAFT00000012197.4	exon3	c.A457G	p.S153G	SNP	exonic	VSTM2B		nonsynonymous SNV	VSTM2B:ENSCAFT00000012197.4:exon3:c.A457G:p.S153G,VSTM2B:ENSCAFT00000085886.1:exon3:c.A658G:p.S220G,VSTM2B:ENSCAFT00000071234.1:exon4:c.A565G:p.S189G	SRP159481	Mammary Tumor
SRR7781000-SRR7781001	chr18	51222300	51222300	G	C	GAL3ST3	Missense_Mutation	ENSCAFT00000020715.4	exon2	c.G1178C	p.S393T	SNP	exonic	GAL3ST3		nonsynonymous SNV	GAL3ST3:ENSCAFT00000020715.4:exon2:c.G1178C:p.S393T	SRP159481	Mammary Tumor
SRR7781000-SRR7781001	chr7	41074313	41074313	A	G	ARHGEF11	Missense_Mutation	ENSCAFT00000026129.4	exon14	c.A1061G	p.N354S	SNP	exonic	ARHGEF11		nonsynonymous SNV	ARHGEF11:ENSCAFT00000026129.4:exon14:c.A1061G:p.N354S,ARHGEF11:ENSCAFT00000042811.3:exon14:c.A1142G:p.N381S,ARHGEF11:ENSCAFT00000046159.3:exon14:c.A1043G:p.N348S,ARHGEF11:ENSCAFT00000026135.5:exon15:c.A1037G:p.N346S,ARHGEF11:ENSCAFT00000063374.1:exon16:c.A797G:p.N266S,ARHGEF11:ENSCAFT00000073740.1:exon16:c.A1157G:p.N386S,ARHGEF11:ENSCAFT00000081344.1:exon16:c.A1157G:p.N386S	SRP159481	Mammary Tumor
SRR7781000-SRR7781001	chr9	50553644	50553644	A	C	RXRA	Missense_Mutation	ENSCAFT00000031555.4	exon4	c.A599C	p.D200A	SNP	exonic	RXRA		nonsynonymous SNV	RXRA:ENSCAFT00000031555.4:exon4:c.A599C:p.D200A,RXRA:ENSCAFT00000063527.1:exon4:c.A785C:p.D262A,RXRA:ENSCAFT00000064790.1:exon4:c.A572C:p.D191A,RXRA:ENSCAFT00000069198.1:exon4:c.A683C:p.D228A,RXRA:ENSCAFT00000069650.1:exon4:c.A569C:p.D190A,RXRA:ENSCAFT00000073795.1:exon4:c.A542C:p.D181A,RXRA:ENSCAFT00000073988.1:exon4:c.A566C:p.D189A,RXRA:ENSCAFT00000080549.1:exon4:c.A569C:p.D190A,RXRA:ENSCAFT000…	SRP159481	Mammary Tumor
SRR7781003-SRR7781002	chr12	11505500	11505500	C	T	PEX6	Missense_Mutation	ENSCAFT00000002738.5	exon11	c.G2176A	p.E726K	SNP	exonic	PEX6		nonsynonymous SNV	PEX6:ENSCAFT00000002738.5:exon11:c.G2176A:p.E726K	SRP159481	Mammary Tumor
SRR7781003-SRR7781002	chr16	9896064	9896064	C	A	ATP6V0A4	Missense_Mutation	ENSCAFT00000006826.4	exon7	c.C466A	p.L156I	SNP	exonic	ATP6V0A4		nonsynonymous SNV	ATP6V0A4:ENSCAFT00000006826.4:exon7:c.C466A:p.L156I	SRP159481	Mammary Tumor
SRR7781003-SRR7781002	chr16	15278461	15278461	G	T	CHPF2	Missense_Mutation	ENSCAFT00000062921.1	exon4	c.G1780T	p.V594L	SNP	exonic	CHPF2		nonsynonymous SNV	CHPF2:ENSCAFT00000062921.1:exon4:c.G1780T:p.V594L,CHPF2:ENSCAFT00000070598.1:exon4:c.G1555T:p.V519L,CHPF2:ENSCAFT00000007821.4:exon5:c.G1675T:p.V559L,CHPF2:ENSCAFT00000075355.1:exon5:c.G1708T:p.V570L	SRP159481	Mammary Tumor
SRR7781003-SRR7781002	chr20	45410281	45410281	C	T	PLVAP	Missense_Mutation	ENSCAFT00000024343.4	exon4	c.C623T	p.T208M	SNP	exonic	PLVAP		nonsynonymous SNV	PLVAP:ENSCAFT00000024343.4:exon4:c.C623T:p.T208M	SRP159481	Mammary Tumor
SRR7781003-SRR7781002	chr30	9295402	9295402	G	T	GANC	Missense_Mutation	ENSCAFT00000016062.4	exon13	c.G1438T	p.D480Y	SNP	exonic	GANC		nonsynonymous SNV	GANC:ENSCAFT00000016062.4:exon13:c.G1438T:p.D480Y,GANC:ENSCAFT00000045640.2:exon13:c.G1438T:p.D480Y	SRP159481	Mammary Tumor
SRR7781003-SRR7781002	chr30	24093159	24093159	C	T	MYO1E	Missense_Mutation	ENSCAFT00000069552.1	exon22	c.G2407A	p.V803I	SNP	exonic	MYO1E		nonsynonymous SNV	MYO1E:ENSCAFT00000069552.1:exon22:c.G2407A:p.V803I,MYO1E:ENSCAFT00000026368.4:exon23:c.G2542A:p.V848I,MYO1E:ENSCAFT00000068956.1:exon23:c.G2542A:p.V848I	SRP159481	Mammary Tumor
SRR7781003-SRR7781002	chr34	12675674	12675674	A	G	PIK3CA	Missense_Mutation	ENSCAFT00000080543.1	exon20	c.A3140G	p.H1047R	SNP	exonic	PIK3CA		nonsynonymous SNV	PIK3CA:ENSCAFT00000080543.1:exon20:c.A3140G:p.H1047R	SRP159481	Mammary Tumor
SRR7781003-SRR7781002	chr36	11355330	11355330	T	C	SCN9A	Missense_Mutation	ENSCAFT00000085582.1	exon11	c.A1930G	p.I644V	SNP	exonic	SCN9A		nonsynonymous SNV	SCN9A:ENSCAFT00000085582.1:exon11:c.A1930G:p.I644V,SCN9A:ENSCAFT00000046546.3:exon12:c.A1777G:p.I593V,SCN9A:ENSCAFT00000081642.1:exon12:c.A1744G:p.I582V,SCN9A:ENSCAFT00000018336.3:exon13:c.A2164G:p.I722V,SCN9A:ENSCAFT00000062692.1:exon13:c.A2131G:p.I711V	SRP159481	Mammary Tumor
SRR7781003-SRR7781002	chr6	54181126	54181126	T	C	TLCD4	Missense_Mutation	ENSCAFT00000031990.2	exon3	c.A124G	p.S42G	SNP	exonic	TLCD4		nonsynonymous SNV	TLCD4:ENSCAFT00000031990.2:exon3:c.A124G:p.S42G	SRP159481	Mammary Tumor
SRR7781003-SRR7781002	chr9	20736859	20736859	G	A	KCNH4	Missense_Mutation	ENSCAFT00000024756.4	exon2	c.G170A	p.R57H	SNP	exonic	KCNH4		nonsynonymous SNV	KCNH4:ENSCAFT00000024756.4:exon2:c.G170A:p.R57H	SRP159481	Mammary Tumor
SRR7781003-SRR7781002	chr9	42615694	42615694	G	A	VTN	Missense_Mutation	ENSCAFT00000029633.4	exon3	c.C350T	p.T117M	SNP	exonic	VTN		nonsynonymous SNV	VTN:ENSCAFT00000029633.4:exon3:c.C350T:p.T117M,VTN:ENSCAFT00000090328.1:exon9:c.C593T:p.T198M	SRP159481	Mammary Tumor
SRR7781003-SRR7781002	chr9	44319290	44319290	G	C	BLMH	Missense_Mutation	ENSCAFT00000030189.4	exon2	c.C46G	p.Q16E	SNP	exonic	BLMH		nonsynonymous SNV	BLMH:ENSCAFT00000030189.4:exon2:c.C46G:p.Q16E,BLMH:ENSCAFT00000074590.1:exon2:c.C46G:p.Q16E	SRP159481	Mammary Tumor
SRR7781003-SRR7781002	chr25	32466554	32466554	T	C	NEFL	Missense_Mutation	ENSCAFT00000080529.1	exon3	c.T1543C	p.Y515H	SNP	exonic	NEFL		nonsynonymous SNV	NEFL:ENSCAFT00000080529.1:exon3:c.T1543C:p.Y515H	SRP159481	Mammary Tumor
SRR7781009-SRR7781008	chr1	22378314	22378314	C	A	DCC	Missense_Mutation	ENSCAFT00000000254.4	exon2	c.G600T	p.L200F	SNP	exonic	DCC		nonsynonymous SNV	DCC:ENSCAFT00000000254.4:exon2:c.G600T:p.L200F,DCC:ENSCAFT00000045423.3:exon2:c.G540T:p.L180F,DCC:ENSCAFT00000079464.1:exon2:c.G237T:p.L79F	SRP159481	Mammary Tumor
SRR7781009-SRR7781008	chr10	38155538	38155538	G	A	TGFBRAP1	Missense_Mutation	ENSCAFT00000003341.4	exon10	c.G2339A	p.R780H	SNP	exonic	TGFBRAP1		nonsynonymous SNV	TGFBRAP1:ENSCAFT00000003341.4:exon10:c.G2339A:p.R780H,TGFBRAP1:ENSCAFT00000077255.1:exon11:c.G2339A:p.R780H	SRP159481	Mammary Tumor
SRR7781009-SRR7781008	chr14	32228630	32228630	C	A	SNX13	Missense_Mutation	ENSCAFT00000003895.4	exon6	c.G496T	p.G166C	SNP	exonic	SNX13		nonsynonymous SNV	SNX13:ENSCAFT00000003895.4:exon6:c.G496T:p.G166C,SNX13:ENSCAFT00000066069.1:exon6:c.G496T:p.G166C,SNX13:ENSCAFT00000083548.1:exon7:c.G529T:p.G177C	SRP159481	Mammary Tumor
SRR7781009-SRR7781008	chr2	76727385	76727385	C	T	EPHA8	Missense_Mutation	ENSCAFT00000023234.5	exon3	c.G242A	p.R81H	SNP	exonic	EPHA8		nonsynonymous SNV	EPHA8:ENSCAFT00000023234.5:exon3:c.G242A:p.R81H	SRP159481	Mammary Tumor
SRR7781009-SRR7781008	chr25	10763723	10763723	C	T	MTUS2	Missense_Mutation	ENSCAFT00000010769.4	exon3	c.G2153A	p.R718Q	SNP	exonic	MTUS2		nonsynonymous SNV	MTUS2:ENSCAFT00000010769.4:exon3:c.G2153A:p.R718Q,MTUS2:ENSCAFT00000038628.4:exon3:c.G2153A:p.R718Q,MTUS2:ENSCAFT00000071967.1:exon3:c.G2153A:p.R718Q	SRP159481	Mammary Tumor
SRR7781009-SRR7781008	chr3	75742220	75742220	G	A	ARAP2	Missense_Mutation	ENSCAFT00000025868.4	exon18	c.G3040A	p.A1014T	SNP	exonic	ARAP2		nonsynonymous SNV	ARAP2:ENSCAFT00000025868.4:exon18:c.G3040A:p.A1014T,ARAP2:ENSCAFT00000090635.1:exon19:c.G3076A:p.A1026T	SRP159481	Mammary Tumor
SRR7781009-SRR7781008	chr34	11316365	11316365	G	A	SLC6A18	Missense_Mutation	ENSCAFT00000016627.4	exon8	c.C998T	p.A333V	SNP	exonic	SLC6A18		nonsynonymous SNV	SLC6A18:ENSCAFT00000016627.4:exon8:c.C998T:p.A333V	SRP159481	Mammary Tumor
SRR7781009-SRR7781008	chr7	28794652	28794652	G	A	SCYL3	Missense_Mutation	ENSCAFT00000045330.2	exon12	c.G1778A	p.R593H	SNP	exonic	SCYL3		nonsynonymous SNV	SCYL3:ENSCAFT00000045330.2:exon12:c.G1778A:p.R593H,SCYL3:ENSCAFT00000066727.1:exon12:c.G1823A:p.R608H,SCYL3:ENSCAFT00000089570.1:exon12:c.G1880A:p.R627H,SCYL3:ENSCAFT00000024012.5:exon13:c.G1937A:p.R646H	SRP159481	Mammary Tumor
SRR7781009-SRR7781008	chr7	41838593	41838593	C	T	ARHGEF2	Missense_Mutation	ENSCAFT00000026745.4	exon5	c.C391T	p.R131C	SNP	exonic	ARHGEF2		nonsynonymous SNV	ARHGEF2:ENSCAFT00000026745.4:exon5:c.C391T:p.R131C,ARHGEF2:ENSCAFT00000064826.1:exon5:c.C418T:p.R140C,ARHGEF2:ENSCAFT00000070937.1:exon6:c.C583T:p.R195C,ARHGEF2:ENSCAFT00000043708.3:exon9:c.C982T:p.R328C,ARHGEF2:ENSCAFT00000060469.1:exon9:c.C982T:p.R328C	SRP159481	Mammary Tumor
SRR7781009-SRR7781008	chr9	32829147	32829147	A	G	OR4D2	Missense_Mutation	ENSCAFT00000046318.2	exon1	c.A646G	p.T216A	SNP	exonic	OR4D2		nonsynonymous SNV	OR4D2:ENSCAFT00000046318.2:exon1:c.A646G:p.T216A	SRP159481	Mammary Tumor
SRR7781012-SRR7781013	chr10	31793969	31793969	T	G	MTERF2	Missense_Mutation	ENSCAFT00000002828.1	exon1	c.T1053G	p.N351K	SNP	exonic	MTERF2		nonsynonymous SNV	MTERF2:ENSCAFT00000002828.1:exon1:c.T1053G:p.N351K	SRP159481	Mammary Tumor
SRR7781012-SRR7781013	chr2	32218116	32218116	A	C	PITRM1	Missense_Mutation	ENSCAFT00000008673.4	exon24	c.A2671C	p.K891Q	SNP	exonic	PITRM1		nonsynonymous SNV	PITRM1:ENSCAFT00000008673.4:exon24:c.A2671C:p.K891Q	SRP159481	Mammary Tumor
SRR7781012-SRR7781013	chr2	66826611	66826611	T	C	ABCC11	Missense_Mutation	ENSCAFT00000016007.5	exon5	c.T626C	p.F209S	SNP	exonic	ABCC11		nonsynonymous SNV	ABCC11:ENSCAFT00000016007.5:exon5:c.T626C:p.F209S,ABCC11:ENSCAFT00000049771.2:exon5:c.T626C:p.F209S,ABCC11:ENSCAFT00000074198.1:exon5:c.T626C:p.F209S,ABCC11:ENSCAFT00000085314.1:exon5:c.T626C:p.F209S,ABCC11:ENSCAFT00000085534.1:exon5:c.T626C:p.F209S	SRP159481	Mammary Tumor
SRR7781012-SRR7781013	chr23	23310819	23310819	A	G	RAB5A	Missense_Mutation	ENSCAFT00000009363.3	exon3	c.T305C	p.I102T	SNP	exonic	RAB5A		nonsynonymous SNV	RAB5A:ENSCAFT00000009363.3:exon3:c.T305C:p.I102T	SRP159481	Mammary Tumor
SRR7781012-SRR7781013	chr7	43279452	43279452	T	C	GATAD2B	Missense_Mutation	ENSCAFT00000027634.3	exon2	c.T134C	p.L45P	SNP	exonic	GATAD2B		nonsynonymous SNV	GATAD2B:ENSCAFT00000027634.3:exon2:c.T134C:p.L45P,GATAD2B:ENSCAFT00000044075.3:exon2:c.T83C:p.L28P	SRP159481	Mammary Tumor
SRR7781012-SRR7781013	chr9	45045746	45045746	G	C	GEMIN4	Missense_Mutation	ENSCAFT00000037731.3	exon2	c.G3239C	p.C1080S	SNP	exonic	GEMIN4		nonsynonymous SNV	GEMIN4:ENSCAFT00000037731.3:exon2:c.G3239C:p.C1080S	SRP159481	Mammary Tumor
SRR7781018-SRR7781019	chr10	305421	305421	C	G	CDK2	Missense_Mutation	ENSCAFT00000077974.1	exon5	c.C700G	p.P234A	SNP	exonic	CDK2		nonsynonymous SNV	CDK2:ENSCAFT00000077974.1:exon5:c.C700G:p.P234A,CDK2:ENSCAFT00000089685.1:exon6:c.C778G:p.P260A,CDK2:ENSCAFT00000000140.2:exon7:c.C880G:p.P294A,CDK2:ENSCAFT00000084046.1:exon8:c.C1024G:p.P342A	SRP159481	Mammary Tumor
SRR7781018-SRR7781019	chr10	61459574	61459574	C	T	USP34	Missense_Mutation	ENSCAFT00000004838.5	exon3	c.G928A	p.A310T	SNP	exonic	USP34		nonsynonymous SNV	USP34:ENSCAFT00000004838.5:exon3:c.G928A:p.A310T,USP34:ENSCAFT00000071222.1:exon3:c.G928A:p.A310T	SRP159481	Mammary Tumor
SRR7781018-SRR7781019	chr12	2136536	2136536	C	A	DLA-DRA	Missense_Mutation	ENSCAFT00000001254.4	exon4	c.C623A	p.P208Q	SNP	exonic	DLA-DRA		nonsynonymous SNV	DLA-DRA:ENSCAFT00000001254.4:exon4:c.C623A:p.P208Q,DLA-DRA:ENSCAFT00000083428.1:exon5:c.C887A:p.P296Q	SRP159481	Mammary Tumor
SRR7781018-SRR7781019	chr25	44173152	44173152	C	A	CHRND	Missense_Mutation	ENSCAFT00000061250.1	exon11	c.C1445A	p.P482H	SNP	exonic	CHRND		nonsynonymous SNV	CHRND:ENSCAFT00000061250.1:exon11:c.C1445A:p.P482H,CHRND:ENSCAFT00000017944.4:exon12:c.C1490A:p.P497H	SRP159481	Mammary Tumor
SRR7781018-SRR7781019	chr32	12502578	12502578	C	T	GPRIN3	Missense_Mutation	ENSCAFT00000015661.3	exon1	c.G1330A	p.G444R	SNP	exonic	GPRIN3		nonsynonymous SNV	GPRIN3:ENSCAFT00000015661.3:exon1:c.G1330A:p.G444R	SRP159481	Mammary Tumor
SRR7781018-SRR7781019	chr37	25770148	25770148	C	T	ATG9A	Missense_Mutation	ENSCAFT00000071400.1	exon13	c.G2075A	p.G692E	SNP	exonic	ATG9A		nonsynonymous SNV	ATG9A:ENSCAFT00000071400.1:exon13:c.G2075A:p.G692E,ATG9A:ENSCAFT00000023938.4:exon14:c.G2237A:p.G746E,ATG9A:ENSCAFT00000066654.1:exon14:c.G2504A:p.G835E	SRP159481	Mammary Tumor
SRR7781018-SRR7781019	chr13	2415112	2415112	T	G	SNX31	Missense_Mutation	ENSCAFT00000081255.1	exon13	c.A1363C	p.S455R	SNP	exonic	SNX31		nonsynonymous SNV	SNX31:ENSCAFT00000081255.1:exon13:c.A1363C:p.S455R	SRP159481	Mammary Tumor
SRR7781018-SRR7781019	chr18	54102204	54102204	A	C	AHNAK	Missense_Mutation	ENSCAFT00000048755.2	exon1	c.A1263C	p.K421N	SNP	exonic	AHNAK		nonsynonymous SNV	AHNAK:ENSCAFT00000048755.2:exon1:c.A1263C:p.K421N,AHNAK:ENSCAFT00000083595.1:exon1:c.A1263C:p.K421N	SRP159481	Mammary Tumor
SRR7781018-SRR7781019	chr27	5982021	5982021	T	C	OR8S11	Missense_Mutation	ENSCAFT00000071361.1	exon1	c.A829G	p.S277G	SNP	exonic	OR8S11		nonsynonymous SNV	OR8S11:ENSCAFT00000071361.1:exon1:c.A829G:p.S277G	SRP159481	Mammary Tumor
SRR7781018-SRR7781019	chr3	85387113	85387113	G	A	SOD3	Missense_Mutation	ENSCAFT00000091044.1	exon1	c.C343T	p.R115W	SNP	exonic	SOD3		nonsynonymous SNV	SOD3:ENSCAFT00000091044.1:exon1:c.C343T:p.R115W	SRP159481	Mammary Tumor
SRR7781018-SRR7781019	chr3	85387118	85387118	G	A	SOD3	Missense_Mutation	ENSCAFT00000091044.1	exon1	c.C338T	p.P113L	SNP	exonic	SOD3		nonsynonymous SNV	SOD3:ENSCAFT00000091044.1:exon1:c.C338T:p.P113L	SRP159481	Mammary Tumor
SRR7781020-SRR7781021	chr10	26932790	26932790	A	T	LGALS1	Missense_Mutation	ENSCAFT00000048962.3	exon2	c.T401A	p.L134H	SNP	exonic	LGALS1		nonsynonymous SNV	LGALS1:ENSCAFT00000048962.3:exon2:c.T401A:p.L134H,LGALS1:ENSCAFT00000002307.4:exon3:c.T212A:p.L71H,LGALS1:ENSCAFT00000060929.1:exon3:c.T218A:p.L73H	SRP159481	Mammary Tumor
SRR7781020-SRR7781021	chr12	5432454	5432454	G	A	BNIP5	Missense_Mutation	ENSCAFT00000002157.4	exon9	c.C1610T	p.S537F	SNP	exonic	BNIP5		nonsynonymous SNV	BNIP5:ENSCAFT00000002157.4:exon9:c.C1610T:p.S537F	SRP159481	Mammary Tumor
SRR7781020-SRR7781021	chr17	28942618	28942618	A	G	CRIM1	Missense_Mutation	ENSCAFT00000009500.4	exon4	c.A821G	p.E274G	SNP	exonic	CRIM1		nonsynonymous SNV	CRIM1:ENSCAFT00000009500.4:exon4:c.A821G:p.E274G	SRP159481	Mammary Tumor
SRR7781020-SRR7781021	chr2	64996804	64996804	C	T	BRD7	Missense_Mutation	ENSCAFT00000015674.5	exon11	c.C1298T	p.A433V	SNP	exonic	BRD7		nonsynonymous SNV	BRD7:ENSCAFT00000015674.5:exon11:c.C1298T:p.A433V	SRP159481	Mammary Tumor
SRR7781020-SRR7781021	chr34	12675674	12675674	A	G	PIK3CA	Missense_Mutation	ENSCAFT00000080543.1	exon20	c.A3140G	p.H1047R	SNP	exonic	PIK3CA		nonsynonymous SNV	PIK3CA:ENSCAFT00000080543.1:exon20:c.A3140G:p.H1047R	SRP159481	Mammary Tumor
SRR7781020-SRR7781021	chr6	37213990	37213990	G	A	ADCY9	Missense_Mutation	ENSCAFT00000030530.3	exon2	c.G266A	p.R89Q	SNP	exonic	ADCY9		nonsynonymous SNV	ADCY9:ENSCAFT00000030530.3:exon2:c.G266A:p.R89Q,ADCY9:ENSCAFT00000044604.3:exon2:c.G266A:p.R89Q,ADCY9:ENSCAFT00000085189.1:exon2:c.G266A:p.R89Q,ADCY9:ENSCAFT00000085807.1:exon2:c.G266A:p.R89Q	SRP159481	Mammary Tumor
SRR7781026-SRR7781027	chr18	8283592	8283592	G	A	INHBA	Missense_Mutation	ENSCAFT00000005699.5	exon2	c.G1073A	p.G358D	SNP	exonic	INHBA		nonsynonymous SNV	INHBA:ENSCAFT00000005699.5:exon2:c.G1073A:p.G358D	SRP159481	Mammary Tumor
SRR7781026-SRR7781027	chr2	57183348	57183348	C	A	ENC1	Missense_Mutation	ENSCAFT00000013146.1	exon1	c.G902T	p.G301V	SNP	exonic	ENC1		nonsynonymous SNV	ENC1:ENSCAFT00000013146.1:exon1:c.G902T:p.G301V	SRP159481	Mammary Tumor
SRR7781026-SRR7781027	chr23	20130268	20130268	G	A	UBE2E2	Missense_Mutation	ENSCAFT00000048578.2	exon5	c.C568T	p.R190W	SNP	exonic	UBE2E2		nonsynonymous SNV	UBE2E2:ENSCAFT00000048578.2:exon5:c.C568T:p.R190W	SRP159481	Mammary Tumor
SRR7781026-SRR7781027	chr24	36662501	36662501	C	T	CEBPB	Missense_Mutation	ENSCAFT00000045511.2	exon1	c.C886T	p.R296C	SNP	exonic	CEBPB		nonsynonymous SNV	CEBPB:ENSCAFT00000045511.2:exon1:c.C886T:p.R296C	SRP159481	Mammary Tumor
SRR7781026-SRR7781027	chr33	13483665	13483665	G	A	IFT57	Missense_Mutation	ENSCAFT00000015740.4	exon2	c.C298T	p.R100C	SNP	exonic	IFT57		nonsynonymous SNV	IFT57:ENSCAFT00000015740.4:exon2:c.C298T:p.R100C	SRP159481	Mammary Tumor
SRR7781026-SRR7781027	chr34	12675674	12675674	A	G	PIK3CA	Missense_Mutation	ENSCAFT00000080543.1	exon20	c.A3140G	p.H1047R	SNP	exonic	PIK3CA		nonsynonymous SNV	PIK3CA:ENSCAFT00000080543.1:exon20:c.A3140G:p.H1047R	SRP159481	Mammary Tumor
SRR7781026-SRR7781027	chr6	38306285	38306285	T	C	SRRM2	Missense_Mutation	ENSCAFT00000087543.1	exon10	c.T6470C	p.I2157T	SNP	exonic	SRRM2		nonsynonymous SNV	SRRM2:ENSCAFT00000087543.1:exon10:c.T6470C:p.I2157T,SRRM2:ENSCAFT00000030745.5:exon11:c.T6503C:p.I2168T,SRRM2:ENSCAFT00000065396.1:exon11:c.T6503C:p.I2168T,SRRM2:ENSCAFT00000075240.1:exon11:c.T6503C:p.I2168T,SRRM2:ENSCAFT00000076290.1:exon11:c.T6503C:p.I2168T,SRRM2:ENSCAFT00000085597.1:exon11:c.T6578C:p.I2193T	SRP159481	Mammary Tumor
SRR7781026-SRR7781027	chr7	12586394	12586394	G	A	CENPF	Missense_Mutation	ENSCAFT00000020009.4	exon10	c.G1442A	p.S481N	SNP	exonic	CENPF		nonsynonymous SNV	CENPF:ENSCAFT00000020009.4:exon10:c.G1442A:p.S481N,CENPF:ENSCAFT00000043283.2:exon10:c.G1427A:p.S476N	SRP159481	Mammary Tumor
SRR7781026-SRR7781027	chr9	621477	621477	C	T	FSCN2	Missense_Mutation	ENSCAFT00000009255.3	exon1	c.G406A	p.A136T	SNP	exonic	FSCN2		nonsynonymous SNV	FSCN2:ENSCAFT00000009255.3:exon1:c.G406A:p.A136T	SRP159481	Mammary Tumor
SRR7781030-SRR7781031	chr1	107947957	107947957	C	A	ZNF114	Missense_Mutation	ENSCAFT00000049696.2	exon4	c.G1074T	p.E358D	SNP	exonic	ZNF114		nonsynonymous SNV	ZNF114:ENSCAFT00000049696.2:exon4:c.G1074T:p.E358D	SRP159481	Mammary Tumor
SRR7781030-SRR7781031	chr15	29611589	29611589	A	T	KITLG	Missense_Mutation	ENSCAFT00000009854.4	exon4	c.T327A	p.D109E	SNP	exonic	KITLG		nonsynonymous SNV	KITLG:ENSCAFT00000009854.4:exon4:c.T327A:p.D109E,KITLG:ENSCAFT00000069614.1:exon4:c.T510A:p.D170E,KITLG:ENSCAFT00000090385.1:exon4:c.T327A:p.D109E,KITLG:ENSCAFT00000090953.1:exon4:c.T327A:p.D109E,KITLG:ENSCAFT00000091918.1:exon4:c.T327A:p.D109E	SRP159481	Mammary Tumor
SRR7781030-SRR7781031	chr17	36797272	36797272	T	A	POLR1B	Missense_Mutation	ENSCAFT00000060855.1	exon13	c.T2606A	p.F869Y	SNP	exonic	POLR1B		nonsynonymous SNV	POLR1B:ENSCAFT00000060855.1:exon13:c.T2606A:p.F869Y,POLR1B:ENSCAFT00000085738.1:exon14:c.T2987A:p.F996Y,POLR1B:ENSCAFT00000011494.4:exon15:c.T3155A:p.F1052Y	SRP159481	Mammary Tumor
SRR7781030-SRR7781031	chr18	39337776	39337776	C	T	OR5AR1	Missense_Mutation	ENSCAFT00000012794.4	exon1	c.G416A	p.R139Q	SNP	exonic	OR5AR1		nonsynonymous SNV	OR5AR1:ENSCAFT00000012794.4:exon1:c.G416A:p.R139Q	SRP159481	Mammary Tumor
SRR7781030-SRR7781031	chr19	3059113	3059113	G	A	MAML3	Missense_Mutation	ENSCAFT00000005950.4	exon6	c.G2667A	p.M889I	SNP	exonic	MAML3		nonsynonymous SNV	MAML3:ENSCAFT00000005950.4:exon6:c.G2667A:p.M889I	SRP159481	Mammary Tumor
SRR7781030-SRR7781031	chr21	23777369	23777369	G	A	POLD3	Missense_Mutation	ENSCAFT00000039190.3	exon6	c.C532T	p.P178S	SNP	exonic	POLD3		nonsynonymous SNV	POLD3:ENSCAFT00000039190.3:exon6:c.C532T:p.P178S,POLD3:ENSCAFT00000060307.1:exon6:c.C532T:p.P178S,POLD3:ENSCAFT00000065469.1:exon6:c.C757T:p.P253S	SRP159481	Mammary Tumor
SRR7781030-SRR7781031	chr22	9468965	9468965	G	T	KBTBD6	Missense_Mutation	ENSCAFT00000007730.5	exon1	c.G1946T	p.C649F	SNP	exonic	KBTBD6		nonsynonymous SNV	KBTBD6:ENSCAFT00000007730.5:exon1:c.G1946T:p.C649F	SRP159481	Mammary Tumor
SRR7781030-SRR7781031	chr32	8546018	8546018	G	A	WDFY3	Missense_Mutation	ENSCAFT00000045131.3	exon18	c.C3473T	p.A1158V	SNP	exonic	WDFY3		nonsynonymous SNV	WDFY3:ENSCAFT00000045131.3:exon18:c.C3473T:p.A1158V,WDFY3:ENSCAFT00000060833.1:exon18:c.C3473T:p.A1158V,WDFY3:ENSCAFT00000071436.1:exon18:c.C3365T:p.A1122V,WDFY3:ENSCAFT00000071781.1:exon18:c.C3443T:p.A1148V,WDFY3:ENSCAFT00000014761.4:exon19:c.C3527T:p.A1176V,WDFY3:ENSCAFT00000065696.1:exon19:c.C3527T:p.A1176V,WDFY3:ENSCAFT00000074071.1:exon20:c.C3467T:p.A1156V,WDFY3:ENSCAFT00000088737.1:exon20:c…	SRP159481	Mammary Tumor
SRR7781030-SRR7781031	chr9	38024160	38024160	G	T	AP2B1	Missense_Mutation	ENSCAFT00000028998.4	exon12	c.C1529A	p.A510E	SNP	exonic	AP2B1		nonsynonymous SNV	AP2B1:ENSCAFT00000028998.4:exon12:c.C1529A:p.A510E,AP2B1:ENSCAFT00000068206.1:exon12:c.C1529A:p.A510E,AP2B1:ENSCAFT00000069402.1:exon12:c.C1529A:p.A510E,AP2B1:ENSCAFT00000072392.1:exon12:c.C1529A:p.A510E	SRP159481	Mammary Tumor
SRR7781032-SRR7781033	chr13	4553177	4553177	A	T	ATP6V1C1	Missense_Mutation	ENSCAFT00000001002.4	exon14	c.A1210T	p.T404S	SNP	exonic	ATP6V1C1		nonsynonymous SNV	ATP6V1C1:ENSCAFT00000001002.4:exon14:c.A1210T:p.T404S	SRP159481	Mammary Tumor
SRR7781032-SRR7781033	chr13	37358208	37358208	G	A	SCRIB	Missense_Mutation	ENSCAFT00000062615.1	exon28	c.C3484T	p.R1162W	SNP	exonic	SCRIB		nonsynonymous SNV	SCRIB:ENSCAFT00000062615.1:exon28:c.C3484T:p.R1162W,SCRIB:ENSCAFT00000068568.1:exon28:c.C3649T:p.R1217W,SCRIB:ENSCAFT00000086009.1:exon28:c.C3649T:p.R1217W,SCRIB:ENSCAFT00000090284.1:exon28:c.C3676T:p.R1226W,SCRIB:ENSCAFT00000002152.4:exon29:c.C3739T:p.R1247W,SCRIB:ENSCAFT00000089062.1:exon29:c.C3739T:p.R1247W	SRP159481	Mammary Tumor
SRR7781032-SRR7781033	chr28	14675312	14675312	G	A	PPRC1	Missense_Mutation	ENSCAFT00000015971.5	exon5	c.G728A	p.R243H	SNP	exonic	PPRC1		nonsynonymous SNV	PPRC1:ENSCAFT00000015971.5:exon5:c.G728A:p.R243H,PPRC1:ENSCAFT00000060100.1:exon5:c.G719A:p.R240H,PPRC1:ENSCAFT00000065630.1:exon5:c.G719A:p.R240H,PPRC1:ENSCAFT00000074520.1:exon5:c.G578A:p.R193H	SRP159481	Mammary Tumor
SRR7781032-SRR7781033	chr34	12675674	12675674	A	G	PIK3CA	Missense_Mutation	ENSCAFT00000080543.1	exon20	c.A3140G	p.H1047R	SNP	exonic	PIK3CA		nonsynonymous SNV	PIK3CA:ENSCAFT00000080543.1:exon20:c.A3140G:p.H1047R	SRP159481	Mammary Tumor
SRR7781032-SRR7781033	chr16	5782171	5782171	T	C	OR2A2	Missense_Mutation	ENSCAFT00000076057.1	exon1	c.A146G	p.H49R	SNP	exonic	OR2A2		nonsynonymous SNV	OR2A2:ENSCAFT00000076057.1:exon1:c.A146G:p.H49R	SRP159481	Mammary Tumor
SRR7781032-SRR7781033	chr25	40089815	40089815	G	A	COL4A3	Missense_Mutation	ENSCAFT00000016556.4	exon42	c.G3560A	p.R1187K	SNP	exonic	COL4A3		nonsynonymous SNV	COL4A3:ENSCAFT00000016556.4:exon42:c.G3560A:p.R1187K,COL4A3:ENSCAFT00000049664.3:exon42:c.G3644A:p.R1215K	SRP159481	Mammary Tumor
SRR7781034-SRR7781035	chr16	7089323	7089323	C	T	MGAM2	Missense_Mutation	ENSCAFT00000006189.4	exon13	c.G1475A	p.C492Y	SNP	exonic	MGAM2		nonsynonymous SNV	MGAM2:ENSCAFT00000006189.4:exon13:c.G1475A:p.C492Y	SRP159481	Mammary Tumor
SRR7781034-SRR7781035	chr17	40222993	40222993	C	T	DNAH6	Missense_Mutation	ENSCAFT00000012666.5	exon44	c.G7013A	p.R2338H	SNP	exonic	DNAH6		nonsynonymous SNV	DNAH6:ENSCAFT00000012666.5:exon44:c.G7013A:p.R2338H	SRP159481	Mammary Tumor
SRR7781034-SRR7781035	chr22	58918198	58918198	G	C	CARS2	Missense_Mutation	ENSCAFT00000036703.3	exon8	c.C942G	p.H314Q	SNP	exonic	CARS2		nonsynonymous SNV	CARS2:ENSCAFT00000036703.3:exon8:c.C942G:p.H314Q	SRP159481	Mammary Tumor
SRR7781034-SRR7781035	chr32	2871740	2871740	T	A	FRAS1	Missense_Mutation	ENSCAFT00000082233.1	exon30	c.T4117A	p.Y1373N	SNP	exonic	FRAS1		nonsynonymous SNV	FRAS1:ENSCAFT00000082233.1:exon30:c.T4117A:p.Y1373N,FRAS1:ENSCAFT00000049130.3:exon32:c.T4363A:p.Y1455N,FRAS1:ENSCAFT00000069559.1:exon32:c.T3469A:p.Y1157N,FRAS1:ENSCAFT00000013952.4:exon33:c.T4504A:p.Y1502N,FRAS1:ENSCAFT00000047713.3:exon33:c.T4504A:p.Y1502N	SRP159481	Mammary Tumor
SRR7781034-SRR7781035	chr33	4908827	4908827	G	T	CRYBG3	Missense_Mutation	ENSCAFT00000012306.6	exon4	c.G6778T	p.D2260Y	SNP	exonic	CRYBG3		nonsynonymous SNV	CRYBG3:ENSCAFT00000012306.6:exon4:c.G6778T:p.D2260Y,CRYBG3:ENSCAFT00000048817.2:exon4:c.G6247T:p.D2083Y	SRP159481	Mammary Tumor
SRR7781034-SRR7781035	chr38	12864163	12864163	T	A	SPATA17	Missense_Mutation	ENSCAFT00000017171.3	exon2	c.T143A	p.V48D	SNP	exonic	SPATA17		nonsynonymous SNV	SPATA17:ENSCAFT00000017171.3:exon2:c.T143A:p.V48D,SPATA17:ENSCAFT00000066401.1:exon2:c.T143A:p.V48D,SPATA17:ENSCAFT00000076390.1:exon2:c.T143A:p.V48D,SPATA17:ENSCAFT00000090824.1:exon2:c.T143A:p.V48D,SPATA17:ENSCAFT00000090877.1:exon2:c.T143A:p.V48D	SRP159481	Mammary Tumor
SRR7781034-SRR7781035	chr6	72091012	72091012	C	T	TNNI3K	Missense_Mutation	ENSCAFT00000032502.4	exon4	c.G278A	p.R93H	SNP	exonic	TNNI3K		nonsynonymous SNV	TNNI3K:ENSCAFT00000032502.4:exon4:c.G278A:p.R93H,TNNI3K:ENSCAFT00000063496.1:exon4:c.G278A:p.R93H,TNNI3K:ENSCAFT00000079320.1:exon4:c.G278A:p.R93H,TNNI3K:ENSCAFT00000091320.1:exon4:c.G278A:p.R93H,TNNI3K:ENSCAFT00000093841.1:exon5:c.G278A:p.R93H	SRP159481	Mammary Tumor
SRR7781036-SRR7781037	chr11	50441464	50441464	C	G	NFX1	Missense_Mutation	ENSCAFT00000071567.1	exon12	c.C1964G	p.T655R	SNP	exonic	NFX1		nonsynonymous SNV	NFX1:ENSCAFT00000071567.1:exon12:c.C1964G:p.T655R,NFX1:ENSCAFT00000002914.4:exon14:c.C2282G:p.T761R,NFX1:ENSCAFT00000084137.1:exon14:c.C2282G:p.T761R	SRP159481	Mammary Tumor
SRR7781036-SRR7781037	chr14	9633196	9633196	C	T	GRM8	Missense_Mutation	ENSCAFT00000002730.5	exon7	c.C1400T	p.A467V	SNP	exonic	GRM8		nonsynonymous SNV	GRM8:ENSCAFT00000002730.5:exon7:c.C1400T:p.A467V,GRM8:ENSCAFT00000063399.1:exon9:c.C1538T:p.A513V	SRP159481	Mammary Tumor
SRR7781036-SRR7781037	chr28	15965349	15965349	A	C	SH3PXD2A	Missense_Mutation	ENSCAFT00000071892.1	exon6	c.T692G	p.V231G	SNP	exonic	SH3PXD2A		nonsynonymous SNV	SH3PXD2A:ENSCAFT00000071892.1:exon6:c.T692G:p.V231G,SH3PXD2A:ENSCAFT00000081478.1:exon6:c.T692G:p.V231G,SH3PXD2A:ENSCAFT00000016636.5:exon7:c.T491G:p.V164G,SH3PXD2A:ENSCAFT00000060602.1:exon8:c.T572G:p.V191G	SRP159481	Mammary Tumor
SRR7781036-SRR7781037	chr32	29693738	29693738	C	T	SEC24B	Missense_Mutation	ENSCAFT00000018118.4	exon2	c.C698T	p.A233V	SNP	exonic	SEC24B		nonsynonymous SNV	SEC24B:ENSCAFT00000018118.4:exon2:c.C698T:p.A233V,SEC24B:ENSCAFT00000042964.3:exon2:c.C698T:p.A233V,SEC24B:ENSCAFT00000081312.1:exon2:c.C698T:p.A233V	SRP159481	Mammary Tumor
SRR7781036-SRR7781037	chr34	12648025	12648025	G	A	PIK3CA	Missense_Mutation	ENSCAFT00000080543.1	exon1	c.G241A	p.E81K	SNP	exonic	PIK3CA		nonsynonymous SNV	PIK3CA:ENSCAFT00000080543.1:exon1:c.G241A:p.E81K,PIK3CA:ENSCAFT00000017863.4:exon2:c.G241A:p.E81K	SRP159481	Mammary Tumor
SRR7781036-SRR7781037	chr6	15733486	15733486	G	A	C6H7orf50	Missense_Mutation	ENSCAFT00000018708.4	exon5	c.G293A	p.R98Q	SNP	exonic	C6H7orf50		nonsynonymous SNV	C6H7orf50:ENSCAFT00000018708.4:exon5:c.G293A:p.R98Q,C6H7orf50:ENSCAFT00000046813.3:exon5:c.G293A:p.R98Q	SRP159481	Mammary Tumor
SRR7781036-SRR7781037	chr22	59090932	59090932	C	T	ANKRD10	Missense_Mutation	ENSCAFT00000059837.1	exon1	c.G253A	p.V85M	SNP	exonic	ANKRD10		nonsynonymous SNV	ANKRD10:ENSCAFT00000059837.1:exon1:c.G253A:p.V85M	SRP159481	Mammary Tumor
SRR7781042-SRR7781043	chr12	1397469	1397469	T	G	C2	Missense_Mutation	ENSCAFT00000081727.1	exon7	c.T1121G	p.L374W	SNP	exonic	C2		nonsynonymous SNV	C2:ENSCAFT00000081727.1:exon7:c.T1121G:p.L374W,C2:ENSCAFT00000070062.1:exon9:c.T1352G:p.L451W,C2:ENSCAFT00000081010.1:exon10:c.T1262G:p.L421W,C2:ENSCAFT00000001072.5:exon11:c.T1370G:p.L457W	SRP159481	Mammary Tumor
SRR7781042-SRR7781043	chr20	36628959	36628959	G	A	DCP1A	Missense_Mutation	ENSCAFT00000013695.4	exon4	c.G707A	p.R236H	SNP	exonic	DCP1A		nonsynonymous SNV	DCP1A:ENSCAFT00000013695.4:exon4:c.G707A:p.R236H,DCP1A:ENSCAFT00000063063.1:exon4:c.G707A:p.R236H,DCP1A:ENSCAFT00000092273.1:exon4:c.G707A:p.R236H	SRP159481	Mammary Tumor
SRR7781042-SRR7781043	chr34	12664344	12664344	T	C	PIK3CA	Missense_Mutation	ENSCAFT00000080543.1	exon11	c.T1810C	p.C604R	SNP	exonic	PIK3CA		nonsynonymous SNV	PIK3CA:ENSCAFT00000080543.1:exon11:c.T1810C:p.C604R,PIK3CA:ENSCAFT00000017863.4:exon12:c.T1810C:p.C604R	SRP159481	Mammary Tumor
SRR7781042-SRR7781043	chr34	12675674	12675674	A	G	PIK3CA	Missense_Mutation	ENSCAFT00000080543.1	exon20	c.A3140G	p.H1047R	SNP	exonic	PIK3CA		nonsynonymous SNV	PIK3CA:ENSCAFT00000080543.1:exon20:c.A3140G:p.H1047R	SRP159481	Mammary Tumor
SRR7781042-SRR7781043	chr5	70102937	70102937	C	A	PLCG2	Missense_Mutation	ENSCAFT00000091657.1	exon19	c.G2225T	p.R742L	SNP	exonic	PLCG2		nonsynonymous SNV	PLCG2:ENSCAFT00000091657.1:exon19:c.G2225T:p.R742L,PLCG2:ENSCAFT00000031815.4:exon20:c.G2438T:p.R813L	SRP159481	Mammary Tumor
SRR7781042-SRR7781043	chr9	42897954	42897954	T	G	PROCA1	Missense_Mutation	ENSCAFT00000029805.6	exon6	c.A530C	p.E177A	SNP	exonic	PROCA1		nonsynonymous SNV	PROCA1:ENSCAFT00000029805.6:exon6:c.A530C:p.E177A	SRP159481	Mammary Tumor
SRR7781044-SRR7781045	chr16	1081165	1081165	G	A	ADCY1	Missense_Mutation	ENSCAFT00000073452.1	exon13	c.C2323T	p.H775Y	SNP	exonic	ADCY1		nonsynonymous SNV	ADCY1:ENSCAFT00000073452.1:exon13:c.C2323T:p.H775Y,ADCY1:ENSCAFT00000085269.1:exon14:c.C2404T:p.H802Y,ADCY1:ENSCAFT00000019469.4:exon15:c.C2554T:p.H852Y,ADCY1:ENSCAFT00000048834.3:exon15:c.C2554T:p.H852Y,ADCY1:ENSCAFT00000086530.1:exon15:c.C2554T:p.H852Y	SRP159481	Mammary Tumor
SRR7781044-SRR7781045	chr21	10442045	10442045	A	T	FOLH1	Missense_Mutation	ENSCAFT00000068616.1	exon6	c.T849A	p.N283K	SNP	exonic	FOLH1		nonsynonymous SNV	FOLH1:ENSCAFT00000068616.1:exon6:c.T849A:p.N283K,FOLH1:ENSCAFT00000006940.4:exon7:c.T774A:p.N258K,FOLH1:ENSCAFT00000069975.1:exon7:c.T819A:p.N273K,FOLH1:ENSCAFT00000093161.1:exon7:c.T819A:p.N273K	SRP159481	Mammary Tumor
SRR7781044-SRR7781045	chr35	16536055	16536055	C	T	NUP153	Missense_Mutation	ENSCAFT00000044410.3	exon15	c.G2206A	p.A736T	SNP	exonic	NUP153		nonsynonymous SNV	NUP153:ENSCAFT00000044410.3:exon15:c.G2206A:p.A736T,NUP153:ENSCAFT00000016120.5:exon16:c.G2332A:p.A778T,NUP153:ENSCAFT00000048809.3:exon16:c.G1924A:p.A642T	SRP159481	Mammary Tumor
SRR7781046-SRR7781047	chr16	55152658	55152658	G	T	CSMD1	Missense_Mutation	ENSCAFT00000013885.4	exon67	c.C10261A	p.L3421I	SNP	exonic	CSMD1		nonsynonymous SNV	CSMD1:ENSCAFT00000013885.4:exon67:c.C10261A:p.L3421I	SRP159481	Mammary Tumor
SRR7781046-SRR7781047	chr20	28907834	28907834	C	T	PTPRG	Missense_Mutation	ENSCAFT00000011505.6	exon6	c.G620A	p.R207H	SNP	exonic	PTPRG		nonsynonymous SNV	PTPRG:ENSCAFT00000011505.6:exon6:c.G620A:p.R207H,PTPRG:ENSCAFT00000011507.5:exon6:c.G620A:p.R207H,PTPRG:ENSCAFT00000090581.1:exon6:c.G620A:p.R207H,PTPRG:ENSCAFT00000079144.1:exon7:c.G884A:p.R295H,PTPRG:ENSCAFT00000070266.1:exon8:c.G968A:p.R323H,PTPRG:ENSCAFT00000086430.1:exon8:c.G968A:p.R323H	SRP159481	Mammary Tumor
SRR7781046-SRR7781047	chr20	57632677	57632677	C	T	SBNO2	Missense_Mutation	ENSCAFT00000066897.1	exon14	c.C1580T	p.S527L	SNP	exonic	SBNO2		nonsynonymous SNV	SBNO2:ENSCAFT00000066897.1:exon14:c.C1580T:p.S527L,SBNO2:ENSCAFT00000063082.1:exon16:c.C1697T:p.S566L,SBNO2:ENSCAFT00000087327.1:exon16:c.C1841T:p.S614L,SBNO2:ENSCAFT00000031066.4:exon17:c.C1841T:p.S614L,SBNO2:ENSCAFT00000062280.1:exon17:c.C1841T:p.S614L,SBNO2:ENSCAFT00000077452.1:exon20:c.C2072T:p.S691L	SRP159481	Mammary Tumor
SRR7781046-SRR7781047	chr35	19773717	19773717	C	G	CDKAL1	Missense_Mutation	ENSCAFT00000016240.4	exon14	c.C1396G	p.P466A	SNP	exonic	CDKAL1		nonsynonymous SNV	CDKAL1:ENSCAFT00000016240.4:exon14:c.C1396G:p.P466A,CDKAL1:ENSCAFT00000069473.1:exon14:c.C1498G:p.P500A,CDKAL1:ENSCAFT00000066026.1:exon15:c.C1561G:p.P521A	SRP159481	Mammary Tumor
SRR7781046-SRR7781047	chr36	11316255	11316255	A	G	SCN9A	Missense_Mutation	ENSCAFT00000085582.1	exon16	c.T3316C	p.C1106R	SNP	exonic	SCN9A		nonsynonymous SNV	SCN9A:ENSCAFT00000085582.1:exon16:c.T3316C:p.C1106R,SCN9A:ENSCAFT00000046546.3:exon17:c.T3163C:p.C1055R,SCN9A:ENSCAFT00000081642.1:exon17:c.T3130C:p.C1044R,SCN9A:ENSCAFT00000018336.3:exon18:c.T3550C:p.C1184R,SCN9A:ENSCAFT00000062692.1:exon18:c.T3517C:p.C1173R	SRP159481	Mammary Tumor
SRR7781046-SRR7781047	chr38	23328973	23328973	G	A	CD1C	Missense_Mutation	ENSCAFT00000018162.3	exon4	c.C958T	p.R320W	SNP	exonic	CD1C		nonsynonymous SNV	CD1C:ENSCAFT00000018162.3:exon4:c.C958T:p.R320W,CD1C:ENSCAFT00000067933.1:exon4:c.C958T:p.R320W	SRP159481	Mammary Tumor
SRR7781046-SRR7781047	chr5	28921315	28921315	G	A	MMP12	Missense_Mutation	ENSCAFT00000071833.1	exon4	c.G541A	p.V181I	SNP	exonic	MMP12		nonsynonymous SNV	MMP12:ENSCAFT00000071833.1:exon4:c.G541A:p.V181I,MMP12:ENSCAFT00000036426.3:exon5:c.G604A:p.V202I	SRP159481	Mammary Tumor
SRR7781049-SRR7780860	chr1	53436406	53436406	C	A	C1H6orf118	Missense_Mutation	ENSCAFT00000001217.4	exon2	c.G598T	p.D200Y	SNP	exonic	C1H6orf118		nonsynonymous SNV	C1H6orf118:ENSCAFT00000001217.4:exon2:c.G598T:p.D200Y,C1H6orf118:ENSCAFT00000047613.3:exon2:c.G598T:p.D200Y	SRP159481	Mammary Tumor
SRR7781049-SRR7780860	chr1	116728641	116728641	A	G	APLP1	Missense_Mutation	ENSCAFT00000010774.5	exon5	c.T1805C	p.L602P	SNP	exonic	APLP1		nonsynonymous SNV	APLP1:ENSCAFT00000010774.5:exon5:c.T1805C:p.L602P	SRP159481	Mammary Tumor
SRR7781049-SRR7780860	chr11	26031138	26031138	C	T	REEP2	Missense_Mutation	ENSCAFT00000001935.3	exon7	c.C589T	p.R197W	SNP	exonic	REEP2		nonsynonymous SNV	REEP2:ENSCAFT00000001935.3:exon7:c.C589T:p.R197W,REEP2:ENSCAFT00000082641.1:exon7:c.C562T:p.R188W	SRP159481	Mammary Tumor
SRR7781049-SRR7780860	chr18	25644303	25644303	T	A	HRAS	Missense_Mutation	ENSCAFT00000048281.2	exon2	c.A182T	p.Q61L	SNP	exonic	HRAS		nonsynonymous SNV	HRAS:ENSCAFT00000048281.2:exon2:c.A182T:p.Q61L,HRAS:ENSCAFT00000064077.1:exon2:c.A182T:p.Q61L	SRP159481	Mammary Tumor
SRR7781049-SRR7780860	chr18	52087804	52087804	C	T	VPS51	Missense_Mutation	ENSCAFT00000079535.1	exon3	c.G445A	p.A149T	SNP	exonic	VPS51		nonsynonymous SNV	VPS51:ENSCAFT00000079535.1:exon3:c.G445A:p.A149T,VPS51:ENSCAFT00000022152.4:exon4:c.G592A:p.A198T,VPS51:ENSCAFT00000085642.1:exon4:c.G592A:p.A198T,VPS51:ENSCAFT00000087537.1:exon4:c.G266A:p.G89D	SRP159481	Mammary Tumor
SRR7781049-SRR7780860	chr8	72326481	72326481	C	T	AKT1	Missense_Mutation	ENSCAFT00000029177.4	exon2	c.G49A	p.E17K	SNP	exonic	AKT1		nonsynonymous SNV	AKT1:ENSCAFT00000029177.4:exon2:c.G49A:p.E17K,AKT1:ENSCAFT00000066075.1:exon2:c.G49A:p.E17K	SRP159481	Mammary Tumor
SRR7781049-SRR7780860	chr9	15558800	15558800	C	T	ABCA5	Missense_Mutation	ENSCAFT00000069507.1	exon9	c.G1411A	p.V471M	SNP	exonic	ABCA5		nonsynonymous SNV	ABCA5:ENSCAFT00000069507.1:exon9:c.G1411A:p.V471M,ABCA5:ENSCAFT00000017398.3:exon10:c.G1411A:p.V471M,ABCA5:ENSCAFT00000017436.4:exon10:c.G1411A:p.V471M,ABCA5:ENSCAFT00000049015.3:exon10:c.G1411A:p.V471M	SRP159481	Mammary Tumor
SRR7781049-SRR7780860	chr15	12982023	12982023	C	G	TRABD2B	Missense_Mutation	ENSCAFT00000037515.3	exon6	c.C1430G	p.A477G	SNP	exonic	TRABD2B		nonsynonymous SNV	TRABD2B:ENSCAFT00000037515.3:exon6:c.C1430G:p.A477G	SRP159481	Mammary Tumor
SRR7781053-SRR7781058	chr1	53468719	53468719	T	G	PDE10A	Missense_Mutation	ENSCAFT00000072371.1	exon19	c.A2057C	p.Q686P	SNP	exonic	PDE10A		nonsynonymous SNV	PDE10A:ENSCAFT00000072371.1:exon19:c.A2057C:p.Q686P,PDE10A:ENSCAFT00000001259.4:exon20:c.A2075C:p.Q692P,PDE10A:ENSCAFT00000045354.3:exon20:c.A2126C:p.Q709P,PDE10A:ENSCAFT00000065186.1:exon20:c.A2099C:p.Q700P,PDE10A:ENSCAFT00000073525.1:exon20:c.A2108C:p.Q703P	SRP159481	Mammary Tumor
SRR7781053-SRR7781058	chr11	51569849	51569849	G	A	PHF24	Missense_Mutation	ENSCAFT00000003104.4	exon1	c.G76A	p.D26N	SNP	exonic	PHF24		nonsynonymous SNV	PHF24:ENSCAFT00000003104.4:exon1:c.G76A:p.D26N	SRP159481	Mammary Tumor
SRR7781053-SRR7781058	chr12	27179660	27179660	C	T	PHF3	Missense_Mutation	ENSCAFT00000063252.1	exon15	c.C5711T	p.P1904L	SNP	exonic	PHF3		nonsynonymous SNV	PHF3:ENSCAFT00000063252.1:exon15:c.C5711T:p.P1904L,PHF3:ENSCAFT00000003930.5:exon16:c.C5711T:p.P1904L	SRP159481	Mammary Tumor
SRR7781053-SRR7781058	chr15	6580248	6580248	C	T	NCDN	Missense_Mutation	ENSCAFT00000005698.4	exon3	c.G460A	p.D154N	SNP	exonic	NCDN		nonsynonymous SNV	NCDN:ENSCAFT00000005698.4:exon3:c.G460A:p.D154N,NCDN:ENSCAFT00000072430.1:exon3:c.G409A:p.D137N	SRP159481	Mammary Tumor
SRR7781053-SRR7781058	chr28	9176004	9176004	C	A	TCTN3	Missense_Mutation	ENSCAFT00000013361.4	exon9	c.G1157T	p.G386V	SNP	exonic	TCTN3		nonsynonymous SNV	TCTN3:ENSCAFT00000013361.4:exon9:c.G1157T:p.G386V	SRP159481	Mammary Tumor
SRR7781053-SRR7781058	chr6	18052763	18052763	G	T	C6H16orf92	Missense_Mutation	ENSCAFT00000036402.3	exon1	c.G143T	p.R48M	SNP	exonic	C6H16orf92		nonsynonymous SNV	C6H16orf92:ENSCAFT00000036402.3:exon1:c.G143T:p.R48M	SRP159481	Mammary Tumor
SRR7781053-SRR7781058	chr25	51297219	51297219	G	A	HDLBP	Missense_Mutation	ENSCAFT00000064622.1	exon1	c.C724T	p.P242S	SNP	exonic	HDLBP		nonsynonymous SNV	HDLBP:ENSCAFT00000064622.1:exon1:c.C724T:p.P242S	SRP159481	Mammary Tumor
SRR7781059-SRR7781056	chr1	89745078	89745078	G	A	DMRT1	Missense_Mutation	ENSCAFT00000003142.5	exon4	c.G881A	p.R294Q	SNP	exonic	DMRT1		nonsynonymous SNV	DMRT1:ENSCAFT00000003142.5:exon4:c.G881A:p.R294Q,DMRT1:ENSCAFT00000082323.1:exon4:c.G881A:p.R294Q	SRP159481	Mammary Tumor
SRR7781059-SRR7781056	chr1	111816975	111816975	G	A	CEACAM28	Missense_Mutation	ENSCAFT00000007721.5	exon3	c.G555A	p.M185I	SNP	exonic	CEACAM28		nonsynonymous SNV	CEACAM28:ENSCAFT00000007721.5:exon3:c.G555A:p.M185I,CEACAM28:ENSCAFT00000045512.3:exon3:c.G555A:p.M185I,CEACAM28:ENSCAFT00000046568.2:exon3:c.G555A:p.M185I	SRP159481	Mammary Tumor
SRR7781059-SRR7781056	chr11	67725934	67725934	T	C	BSPRY	Missense_Mutation	ENSCAFT00000005196.4	exon6	c.T877C	p.Y293H	SNP	exonic	BSPRY		nonsynonymous SNV	BSPRY:ENSCAFT00000005196.4:exon6:c.T877C:p.Y293H,BSPRY:ENSCAFT00000073981.1:exon6:c.T769C:p.Y257H,BSPRY:ENSCAFT00000093708.1:exon6:c.T901C:p.Y301H	SRP159481	Mammary Tumor
SRR7781059-SRR7781056	chr12	15726642	15726642	C	T	ADGRF2	Missense_Mutation	ENSCAFT00000003307.5	exon6	c.C1246T	p.R416C	SNP	exonic	ADGRF2		nonsynonymous SNV	ADGRF2:ENSCAFT00000003307.5:exon6:c.C1246T:p.R416C,ADGRF2:ENSCAFT00000048418.2:exon6:c.C1246T:p.R416C	SRP159481	Mammary Tumor
SRR7781059-SRR7781056	chr17	15884450	15884450	C	T	APOB	Missense_Mutation	ENSCAFT00000006266.3	exon25	c.G8248A	p.V2750I	SNP	exonic	APOB		nonsynonymous SNV	APOB:ENSCAFT00000006266.3:exon25:c.G8248A:p.V2750I	SRP159481	Mammary Tumor
SRR7781059-SRR7781056	chr2	76547772	76547772	C	T	EPHB2	Missense_Mutation	ENSCAFT00000023227.4	exon3	c.G550A	p.A184T	SNP	exonic	EPHB2		nonsynonymous SNV	EPHB2:ENSCAFT00000023227.4:exon3:c.G550A:p.A184T,EPHB2:ENSCAFT00000073617.1:exon3:c.G544A:p.A182T,EPHB2:ENSCAFT00000083865.1:exon3:c.G550A:p.A184T	SRP159481	Mammary Tumor
SRR7781059-SRR7781056	chr20	42308359	42308359	C	T	CCR2	Missense_Mutation	ENSCAFT00000021891.1	exon1	c.G340A	p.A114T	SNP	exonic	CCR2		nonsynonymous SNV	CCR2:ENSCAFT00000021891.1:exon1:c.G340A:p.A114T	SRP159481	Mammary Tumor
SRR7781059-SRR7781056	chr25	15295084	15295084	T	C	SACS	Missense_Mutation	ENSCAFT00000075502.1	exon8	c.T12509C	p.I4170T	SNP	exonic	SACS		nonsynonymous SNV	SACS:ENSCAFT00000075502.1:exon8:c.T12509C:p.I4170T,SACS:ENSCAFT00000066845.1:exon10:c.T12683C:p.I4228T,SACS:ENSCAFT00000011468.4:exon11:c.T12692C:p.I4231T	SRP159481	Mammary Tumor
SRR7781059-SRR7781056	chr26	28045187	28045187	A	G	SPECC1L	Missense_Mutation	ENSCAFT00000021938.3	exon3	c.A530G	p.D177G	SNP	exonic	SPECC1L		nonsynonymous SNV	SPECC1L:ENSCAFT00000021938.3:exon3:c.A530G:p.D177G,SPECC1L:ENSCAFT00000044866.3:exon3:c.A530G:p.D177G,SPECC1L:ENSCAFT00000088435.1:exon3:c.A530G:p.D177G	SRP159481	Mammary Tumor
SRR7781059-SRR7781056	chr27	22261798	22261798	G	T	KRAS	Missense_Mutation	ENSCAFT00000010525.4	exon2	c.G317T	p.G106V	SNP	exonic	KRAS		nonsynonymous SNV	KRAS:ENSCAFT00000010525.4:exon2:c.G317T:p.G106V,KRAS:ENSCAFT00000093055.1:exon2:c.G317T:p.G106V	SRP159481	Mammary Tumor
SRR7781059-SRR7781056	chr28	33247665	33247665	G	A	CPXM2	Missense_Mutation	ENSCAFT00000020154.4	exon7	c.C694T	p.R232W	SNP	exonic	CPXM2		nonsynonymous SNV	CPXM2:ENSCAFT00000020154.4:exon7:c.C694T:p.R232W,CPXM2:ENSCAFT00000046613.3:exon7:c.C922T:p.R308W,CPXM2:ENSCAFT00000083599.1:exon13:c.C2104T:p.R702W	SRP159481	Mammary Tumor
SRR7781059-SRR7781056	chr36	5156598	5156598	G	A	BAZ2B	Missense_Mutation	ENSCAFT00000077480.1	exon12	c.C2536T	p.R846W	SNP	exonic	BAZ2B		nonsynonymous SNV	BAZ2B:ENSCAFT00000077480.1:exon12:c.C2536T:p.R846W,BAZ2B:ENSCAFT00000083363.1:exon12:c.C2638T:p.R880W,BAZ2B:ENSCAFT00000090727.1:exon12:c.C2446T:p.R816W,BAZ2B:ENSCAFT00000015011.4:exon13:c.C2740T:p.R914W,BAZ2B:ENSCAFT00000015012.5:exon13:c.C2740T:p.R914W,BAZ2B:ENSCAFT00000060734.1:exon13:c.C2740T:p.R914W,BAZ2B:ENSCAFT00000061681.1:exon13:c.C2740T:p.R914W,BAZ2B:ENSCAFT00000080089.1:exon13:c.C2740T…	SRP159481	Mammary Tumor
SRR7781059-SRR7781056	chr4	36052619	36052619	C	T	PRELID1	Missense_Mutation	ENSCAFT00000026061.4	exon3	c.G328A	p.E110K	SNP	exonic	PRELID1		nonsynonymous SNV	PRELID1:ENSCAFT00000026061.4:exon3:c.G328A:p.E110K	SRP159481	Mammary Tumor
SRR7781059-SRR7781056	chr6	15824662	15824662	C	A	GPR146	Missense_Mutation	ENSCAFT00000018692.1	exon1	c.G457T	p.G153C	SNP	exonic	GPR146		nonsynonymous SNV	GPR146:ENSCAFT00000018692.1:exon1:c.G457T:p.G153C	SRP159481	Mammary Tumor
SRR7781059-SRR7781056	chr7	2575980	2575980	C	A	KIF14	Missense_Mutation	ENSCAFT00000017720.5	exon19	c.C3244A	p.Q1082K	SNP	exonic	KIF14		nonsynonymous SNV	KIF14:ENSCAFT00000017720.5:exon19:c.C3244A:p.Q1082K,KIF14:ENSCAFT00000049013.3:exon19:c.C3244A:p.Q1082K	SRP159481	Mammary Tumor
SRR7781065-SRR7781064	chr1	91267336	91267336	C	T	VLDLR	Missense_Mutation	ENSCAFT00000064967.1	exon14	c.C2099T	p.T700M	SNP	exonic	VLDLR		nonsynonymous SNV	VLDLR:ENSCAFT00000064967.1:exon14:c.C2099T:p.T700M,VLDLR:ENSCAFT00000037573.4:exon15:c.C2222T:p.T741M,VLDLR:ENSCAFT00000037581.3:exon15:c.C2222T:p.T741M	SRP159481	Mammary Tumor
SRR7781065-SRR7781064	chr1	113423799	113423799	G	A	MAP3K10	Missense_Mutation	ENSCAFT00000008670.5	exon5	c.C997T	p.P333S	SNP	exonic	MAP3K10		nonsynonymous SNV	MAP3K10:ENSCAFT00000008670.5:exon5:c.C997T:p.P333S	SRP159481	Mammary Tumor
SRR7781065-SRR7781064	chr10	50776669	50776669	T	G	FSHR	Missense_Mutation	ENSCAFT00000074749.1	exon8	c.A701C	p.K234T	SNP	exonic	FSHR		nonsynonymous SNV	FSHR:ENSCAFT00000074749.1:exon8:c.A701C:p.K234T,FSHR:ENSCAFT00000078079.1:exon8:c.A704C:p.K235T,FSHR:ENSCAFT00000004260.3:exon9:c.A779C:p.K260T,FSHR:ENSCAFT00000069633.1:exon10:c.A815C:p.K272T,FSHR:ENSCAFT00000071795.1:exon10:c.A704C:p.K235T	SRP159481	Mammary Tumor
SRR7781065-SRR7781064	chr10	68221915	68221915	C	T	AAK1	Missense_Mutation	ENSCAFT00000005298.5	exon10	c.G1172A	p.R391K	SNP	exonic	AAK1		nonsynonymous SNV	AAK1:ENSCAFT00000005298.5:exon10:c.G1172A:p.R391K,AAK1:ENSCAFT00000044943.2:exon10:c.G1172A:p.R391K,AAK1:ENSCAFT00000085437.1:exon10:c.G1172A:p.R391K,AAK1:ENSCAFT00000088381.1:exon10:c.G1172A:p.R391K,AAK1:ENSCAFT00000089936.1:exon10:c.G1172A:p.R391K,AAK1:ENSCAFT00000092799.1:exon10:c.G1172A:p.R391K	SRP159481	Mammary Tumor
SRR7781065-SRR7781064	chr11	67302675	67302675	A	G	SLC46A2	Missense_Mutation	ENSCAFT00000004918.4	exon3	c.T1294C	p.Y432H	SNP	exonic	SLC46A2		nonsynonymous SNV	SLC46A2:ENSCAFT00000004918.4:exon3:c.T1294C:p.Y432H	SRP159481	Mammary Tumor
SRR7781065-SRR7781064	chr12	7887345	7887345	G	C	DNAH8	Missense_Mutation	ENSCAFT00000049946.2	exon79	c.G11362C	p.G3788R	SNP	exonic	DNAH8		nonsynonymous SNV	DNAH8:ENSCAFT00000049946.2:exon79:c.G11362C:p.G3788R	SRP159481	Mammary Tumor
SRR7781065-SRR7781064	chr12	11635480	11635480	C	T	PTK7	Missense_Mutation	ENSCAFT00000002859.5	exon2	c.C353T	p.S118F	SNP	exonic	PTK7		nonsynonymous SNV	PTK7:ENSCAFT00000002859.5:exon2:c.C353T:p.S118F,PTK7:ENSCAFT00000002860.3:exon2:c.C353T:p.S118F,PTK7:ENSCAFT00000060073.1:exon2:c.C353T:p.S118F,PTK7:ENSCAFT00000074486.1:exon2:c.C353T:p.S118F,PTK7:ENSCAFT00000081119.1:exon2:c.C353T:p.S118F,PTK7:ENSCAFT00000083058.1:exon2:c.C353T:p.S118F	SRP159481	Mammary Tumor
SRR7781065-SRR7781064	chr12	44371771	44371771	C	A	MRAP2	Missense_Mutation	ENSCAFT00000048259.2	exon4	c.C400A	p.Q134K	SNP	exonic	MRAP2		nonsynonymous SNV	MRAP2:ENSCAFT00000048259.2:exon4:c.C400A:p.Q134K,MRAP2:ENSCAFT00000069821.1:exon4:c.C463A:p.Q155K	SRP159481	Mammary Tumor
SRR7781065-SRR7781064	chr13	53512829	53512829	C	T	ADGRL3	Missense_Mutation	ENSCAFT00000003726.3	exon22	c.C3623T	p.T1208M	SNP	exonic	ADGRL3		nonsynonymous SNV	ADGRL3:ENSCAFT00000003726.3:exon22:c.C3623T:p.T1208M,ADGRL3:ENSCAFT00000062438.1:exon23:c.C3626T:p.T1209M,ADGRL3:ENSCAFT00000064959.1:exon23:c.C3542T:p.T1181M,ADGRL3:ENSCAFT00000003727.5:exon24:c.C3719T:p.T1240M,ADGRL3:ENSCAFT00000091350.1:exon24:c.C3719T:p.T1240M,ADGRL3:ENSCAFT00000091739.1:exon24:c.C3665T:p.T1222M,ADGRL3:ENSCAFT00000060690.1:exon25:c.C3746T:p.T1249M,ADGRL3:ENSCAFT00000064577.1:…	SRP159481	Mammary Tumor
SRR7781065-SRR7781064	chr14	1005903	1005903	A	T	PRSS38	Missense_Mutation	ENSCAFT00000001834.4	exon3	c.T1305A	p.H435Q	SNP	exonic	PRSS38		nonsynonymous SNV	PRSS38:ENSCAFT00000001834.4:exon3:c.T1305A:p.H435Q	SRP159481	Mammary Tumor
SRR7781065-SRR7781064	chr14	1005905	1005905	G	T	PRSS38	Missense_Mutation	ENSCAFT00000001834.4	exon3	c.C1303A	p.H435N	SNP	exonic	PRSS38		nonsynonymous SNV	PRSS38:ENSCAFT00000001834.4:exon3:c.C1303A:p.H435N	SRP159481	Mammary Tumor
SRR7781065-SRR7781064	chr14	2466478	2466478	C	T	OR2T4C	Missense_Mutation	ENSCAFT00000001946.2	exon1	c.C359T	p.A120V	SNP	exonic	OR2T4C		nonsynonymous SNV	OR2T4C:ENSCAFT00000001946.2:exon1:c.C359T:p.A120V	SRP159481	Mammary Tumor
SRR7781065-SRR7781064	chr14	23186082	23186082	G	T	MIOS	Missense_Mutation	ENSCAFT00000061457.1	exon4	c.G1426T	p.G476C	SNP	exonic	MIOS		nonsynonymous SNV	MIOS:ENSCAFT00000061457.1:exon4:c.G1426T:p.G476C,MIOS:ENSCAFT00000065167.1:exon4:c.G1426T:p.G476C,MIOS:ENSCAFT00000003515.4:exon5:c.G1426T:p.G476C,MIOS:ENSCAFT00000080319.1:exon5:c.G1426T:p.G476C	SRP159481	Mammary Tumor
SRR7781065-SRR7781064	chr14	40899072	40899072	T	A	TAX1BP1	Missense_Mutation	ENSCAFT00000004812.4	exon12	c.T1609A	p.Y537N	SNP	exonic	TAX1BP1		nonsynonymous SNV	TAX1BP1:ENSCAFT00000004812.4:exon12:c.T1609A:p.Y537N,TAX1BP1:ENSCAFT00000004815.5:exon12:c.T1609A:p.Y537N,TAX1BP1:ENSCAFT00000063850.1:exon12:c.T1609A:p.Y537N,TAX1BP1:ENSCAFT00000067918.1:exon12:c.T1609A:p.Y537N,TAX1BP1:ENSCAFT00000070696.1:exon12:c.T1609A:p.Y537N,TAX1BP1:ENSCAFT00000078765.1:exon13:c.T1630A:p.Y544N	SRP159481	Mammary Tumor
SRR7781065-SRR7781064	chr15	13894970	13894970	T	G	MKNK1	Missense_Mutation	ENSCAFT00000075308.1	exon9	c.T684G	p.S228R	SNP	exonic	MKNK1		nonsynonymous SNV	MKNK1:ENSCAFT00000075308.1:exon9:c.T684G:p.S228R,MKNK1:ENSCAFT00000006752.5:exon10:c.T933G:p.S311R,MKNK1:ENSCAFT00000006753.4:exon10:c.T951G:p.S317R	SRP159481	Mammary Tumor
SRR7781065-SRR7781064	chr16	20674095	20674095	A	G	NCAPG2	Missense_Mutation	ENSCAFT00000086335.1	exon15	c.T1676C	p.V559A	SNP	exonic	NCAPG2		nonsynonymous SNV	NCAPG2:ENSCAFT00000086335.1:exon15:c.T1676C:p.V559A,NCAPG2:ENSCAFT00000008416.3:exon16:c.T1808C:p.V603A,NCAPG2:ENSCAFT00000084035.1:exon16:c.T1802C:p.V601A,NCAPG2:ENSCAFT00000091349.1:exon16:c.T1802C:p.V601A	SRP159481	Mammary Tumor
SRR7781065-SRR7781064	chr16	25841172	25841172	T	A	ADAM2	Missense_Mutation	ENSCAFT00000092367.1	exon10	c.A904T	p.I302L	SNP	exonic	ADAM2		nonsynonymous SNV	ADAM2:ENSCAFT00000092367.1:exon10:c.A904T:p.I302L,ADAM2:ENSCAFT00000048219.2:exon11:c.A961T:p.I321L	SRP159481	Mammary Tumor
SRR7781065-SRR7781064	chr16	27068449	27068449	C	T	FGFR1	Missense_Mutation	ENSCAFT00000063774.1	exon5	c.C481T	p.P161S	SNP	exonic	FGFR1		nonsynonymous SNV	FGFR1:ENSCAFT00000063774.1:exon5:c.C481T:p.P161S,FGFR1:ENSCAFT00000075861.1:exon5:c.C481T:p.P161S,FGFR1:ENSCAFT00000009709.4:exon7:c.C847T:p.P283S,FGFR1:ENSCAFT00000071474.1:exon7:c.C748T:p.P250S,FGFR1:ENSCAFT00000084508.1:exon7:c.C754T:p.P252S	SRP159481	Mammary Tumor
SRR7781065-SRR7781064	chr17	202219	202219	C	G	SH3YL1	Missense_Mutation	ENSCAFT00000084768.1	exon9	c.G862C	p.D288H	SNP	exonic	SH3YL1		nonsynonymous SNV	SH3YL1:ENSCAFT00000084768.1:exon9:c.G862C:p.D288H,SH3YL1:ENSCAFT00000005142.3:exon10:c.G922C:p.D308H	SRP159481	Mammary Tumor
SRR7781065-SRR7781064	chr17	19923394	19923394	G	T	ASXL2	Missense_Mutation	ENSCAFT00000006807.5	exon12	c.C3506A	p.P1169Q	SNP	exonic	ASXL2		nonsynonymous SNV	ASXL2:ENSCAFT00000006807.5:exon12:c.C3506A:p.P1169Q,ASXL2:ENSCAFT00000071328.1:exon12:c.C3506A:p.P1169Q,ASXL2:ENSCAFT00000093614.1:exon14:c.C3485A:p.P1162Q	SRP159481	Mammary Tumor
SRR7781065-SRR7781064	chr18	9455001	9455001	A	C	SUGCT	Missense_Mutation	ENSCAFT00000064679.1	exon9	c.T704G	p.I235S	SNP	exonic	SUGCT		nonsynonymous SNV	SUGCT:ENSCAFT00000064679.1:exon9:c.T704G:p.I235S,SUGCT:ENSCAFT00000068777.1:exon10:c.T848G:p.I283S,SUGCT:ENSCAFT00000005705.4:exon11:c.T911G:p.I304S	SRP159481	Mammary Tumor
SRR7781065-SRR7781064	chr18	12939534	12939534	C	G	SLC26A4	Missense_Mutation	ENSCAFT00000006271.4	exon3	c.G174C	p.R58S	SNP	exonic	SLC26A4		nonsynonymous SNV	SLC26A4:ENSCAFT00000006271.4:exon3:c.G174C:p.R58S,SLC26A4:ENSCAFT00000063998.1:exon3:c.G174C:p.R58S,SLC26A4:ENSCAFT00000076710.1:exon3:c.G174C:p.R58S,SLC26A4:ENSCAFT00000080631.1:exon3:c.G174C:p.R58S	SRP159481	Mammary Tumor
SRR7781065-SRR7781064	chr19	2221487	2221487	C	T	TBC1D9	Missense_Mutation	ENSCAFT00000047686.3	exon8	c.C1240T	p.R414C	SNP	exonic	TBC1D9		nonsynonymous SNV	TBC1D9:ENSCAFT00000047686.3:exon8:c.C1240T:p.R414C,TBC1D9:ENSCAFT00000005903.4:exon9:c.C1510T:p.R504C,TBC1D9:ENSCAFT00000048876.3:exon9:c.C1510T:p.R504C	SRP159481	Mammary Tumor
SRR7781065-SRR7781064	chr19	50667461	50667461	C	T	KIF5C	Missense_Mutation	ENSCAFT00000069652.1	exon23	c.C2819T	p.A940V	SNP	exonic	KIF5C		nonsynonymous SNV	KIF5C:ENSCAFT00000069652.1:exon23:c.C2819T:p.A940V,KIF5C:ENSCAFT00000009048.4:exon24:c.C2633T:p.A878V,KIF5C:ENSCAFT00000089838.1:exon24:c.C2633T:p.A878V	SRP159481	Mammary Tumor
SRR7781065-SRR7781064	chr19	53216472	53216472	C	T	STAM2	Missense_Mutation	ENSCAFT00000009335.4	exon14	c.G1546A	p.A516T	SNP	exonic	STAM2		nonsynonymous SNV	STAM2:ENSCAFT00000009335.4:exon14:c.G1546A:p.A516T	SRP159481	Mammary Tumor
SRR7781065-SRR7781064	chr2	59329287	59329287	G	A	NLRC5	Missense_Mutation	ENSCAFT00000014230.4	exon4	c.C929T	p.P310L	SNP	exonic	NLRC5		nonsynonymous SNV	NLRC5:ENSCAFT00000014230.4:exon4:c.C929T:p.P310L,NLRC5:ENSCAFT00000059964.1:exon4:c.C989T:p.P330L,NLRC5:ENSCAFT00000060465.1:exon4:c.C989T:p.P330L,NLRC5:ENSCAFT00000064277.1:exon4:c.C989T:p.P330L,NLRC5:ENSCAFT00000072274.1:exon4:c.C989T:p.P330L,NLRC5:ENSCAFT00000072910.1:exon4:c.C929T:p.P310L,NLRC5:ENSCAFT00000079308.1:exon4:c.C989T:p.P330L,NLRC5:ENSCAFT00000079386.1:exon4:c.C989T:p.P330L,NLRC5:E…	SRP159481	Mammary Tumor
SRR7781065-SRR7781064	chr20	52731619	52731619	G	A	FBN3	Missense_Mutation	ENSCAFT00000029319.4	exon59	c.C7432T	p.R2478C	SNP	exonic	FBN3		nonsynonymous SNV	FBN3:ENSCAFT00000029319.4:exon59:c.C7432T:p.R2478C,FBN3:ENSCAFT00000074242.1:exon60:c.C7558T:p.R2520C	SRP159481	Mammary Tumor
SRR7781065-SRR7781064	chr20	57384677	57384677	T	G	APC2	Missense_Mutation	ENSCAFT00000031029.5	exon10	c.A4432C	p.T1478P	SNP	exonic	APC2		nonsynonymous SNV	APC2:ENSCAFT00000031029.5:exon10:c.A4432C:p.T1478P	SRP159481	Mammary Tumor
SRR7781065-SRR7781064	chr24	8736282	8736282	T	C	SEL1L2	Missense_Mutation	ENSCAFT00000008963.5	exon4	c.T284C	p.L95S	SNP	exonic	SEL1L2		nonsynonymous SNV	SEL1L2:ENSCAFT00000008963.5:exon4:c.T284C:p.L95S,SEL1L2:ENSCAFT00000044986.2:exon4:c.T284C:p.L95S,SEL1L2:ENSCAFT00000061693.1:exon4:c.T284C:p.L95S,SEL1L2:ENSCAFT00000093255.1:exon4:c.T263C:p.L88S	SRP159481	Mammary Tumor
SRR7781065-SRR7781064	chr24	12838258	12838258	C	T	PLCB4	Missense_Mutation	ENSCAFT00000067769.1	exon10	c.G649A	p.G217S	SNP	exonic	PLCB4		nonsynonymous SNV	PLCB4:ENSCAFT00000067769.1:exon10:c.G649A:p.G217S,PLCB4:ENSCAFT00000009371.4:exon12:c.G853A:p.G285S,PLCB4:ENSCAFT00000009402.5:exon12:c.G853A:p.G285S,PLCB4:ENSCAFT00000067879.1:exon12:c.G853A:p.G285S,PLCB4:ENSCAFT00000090822.1:exon12:c.G853A:p.G285S	SRP159481	Mammary Tumor
SRR7781065-SRR7781064	chr24	44555303	44555303	G	C	FAM217B	Missense_Mutation	ENSCAFT00000037177.3	exon4	c.G1525C	p.A509P	SNP	exonic	FAM217B		nonsynonymous SNV	FAM217B:ENSCAFT00000037177.3:exon4:c.G1525C:p.A509P	SRP159481	Mammary Tumor
SRR7781065-SRR7781064	chr25	10764765	10764765	C	T	MTUS2	Missense_Mutation	ENSCAFT00000010769.4	exon3	c.G1111A	p.A371T	SNP	exonic	MTUS2		nonsynonymous SNV	MTUS2:ENSCAFT00000010769.4:exon3:c.G1111A:p.A371T,MTUS2:ENSCAFT00000038628.4:exon3:c.G1111A:p.A371T,MTUS2:ENSCAFT00000071967.1:exon3:c.G1111A:p.A371T	SRP159481	Mammary Tumor
SRR7781065-SRR7781064	chr26	46575	46575	C	T	ZNF268	Missense_Mutation	ENSCAFT00000069605.1	exon4	c.G2417A	p.R806Q	SNP	exonic	ZNF268		nonsynonymous SNV	ZNF268:ENSCAFT00000069605.1:exon4:c.G2417A:p.R806Q,ZNF268:ENSCAFT00000083063.1:exon4:c.G2285A:p.R762Q,ZNF268:ENSCAFT00000042937.3:exon5:c.G2486A:p.R829Q,ZNF268:ENSCAFT00000082757.1:exon6:c.G2543A:p.R848Q,ZNF268:ENSCAFT00000065918.1:exon7:c.G2609A:p.R870Q	SRP159481	Mammary Tumor
SRR7781065-SRR7781064	chr26	13769209	13769209	G	C	FBXO21	Missense_Mutation	ENSCAFT00000014796.4	exon1	c.C26G	p.A9G	SNP	exonic	FBXO21		nonsynonymous SNV	FBXO21:ENSCAFT00000014796.4:exon1:c.C26G:p.A9G	SRP159481	Mammary Tumor
SRR7781065-SRR7781064	chr26	19149243	19149243	G	T	KIAA1671	Missense_Mutation	ENSCAFT00000018343.5	exon3	c.G3961T	p.A1321S	SNP	exonic	KIAA1671		nonsynonymous SNV	KIAA1671:ENSCAFT00000018343.5:exon3:c.G3961T:p.A1321S	SRP159481	Mammary Tumor
SRR7781065-SRR7781064	chr26	30776572	30776572	C	T	HIC2	Missense_Mutation	ENSCAFT00000048975.2	exon2	c.G1743A	p.M581I	SNP	exonic	HIC2		nonsynonymous SNV	HIC2:ENSCAFT00000048975.2:exon2:c.G1743A:p.M581I	SRP159481	Mammary Tumor
SRR7781065-SRR7781064	chr27	34759093	34759093	T	C	SMIM10L1	Missense_Mutation	ENSCAFT00000021236.3	exon1	c.A85G	p.K29E	SNP	exonic	SMIM10L1		nonsynonymous SNV	SMIM10L1:ENSCAFT00000021236.3:exon1:c.A85G:p.K29E	SRP159481	Mammary Tumor
SRR7781065-SRR7781064	chr29	24846047	24846047	C	A	ZFHX4	Missense_Mutation	ENSCAFT00000013195.5	exon12	c.C10649A	p.S3550Y	SNP	exonic	ZFHX4		nonsynonymous SNV	ZFHX4:ENSCAFT00000013195.5:exon12:c.C10649A:p.S3550Y	SRP159481	Mammary Tumor
SRR7781065-SRR7781064	chr29	31806458	31806458	G	A	CA13	Missense_Mutation	ENSCAFT00000050010.2	exon6	c.G622A	p.V208I	SNP	exonic	CA13		nonsynonymous SNV	CA13:ENSCAFT00000050010.2:exon6:c.G622A:p.V208I,CA13:ENSCAFT00000073384.1:exon6:c.G673A:p.V225I,CA13:ENSCAFT00000083212.1:exon6:c.G622A:p.V208I,CA13:ENSCAFT00000083338.1:exon6:c.G622A:p.V208I	SRP159481	Mammary Tumor
SRR7781065-SRR7781064	chr29	36725407	36725407	G	A	SLC26A7	Missense_Mutation	ENSCAFT00000067414.1	exon16	c.G1634A	p.R545K	SNP	exonic	SLC26A7		nonsynonymous SNV	SLC26A7:ENSCAFT00000067414.1:exon16:c.G1634A:p.R545K,SLC26A7:ENSCAFT00000075461.1:exon16:c.G1688A:p.R563K,SLC26A7:ENSCAFT00000014392.3:exon17:c.G1799A:p.R600K	SRP159481	Mammary Tumor
SRR7781065-SRR7781064	chr3	60935834	60935834	G	T	RGS12	Missense_Mutation	ENSCAFT00000068596.1	exon6	c.C2446A	p.H816N	SNP	exonic	RGS12		nonsynonymous SNV	RGS12:ENSCAFT00000068596.1:exon6:c.C2446A:p.H816N,RGS12:ENSCAFT00000087651.1:exon6:c.C619A:p.H207N,RGS12:ENSCAFT00000048451.2:exon7:c.C2563A:p.H855N,RGS12:ENSCAFT00000072322.1:exon7:c.C2563A:p.H855N	SRP159481	Mammary Tumor
SRR7781065-SRR7781064	chr30	8748624	8748624	A	C	MGA	Missense_Mutation	ENSCAFT00000015348.5	exon7	c.A3047C	p.K1016T	SNP	exonic	MGA		nonsynonymous SNV	MGA:ENSCAFT00000015348.5:exon7:c.A3047C:p.K1016T,MGA:ENSCAFT00000015349.5:exon7:c.A3047C:p.K1016T	SRP159481	Mammary Tumor
SRR7781065-SRR7781064	chr30	8780499	8780499	G	A	MGA	Missense_Mutation	ENSCAFT00000015349.5	exon14	c.G4894A	p.V1632I	SNP	exonic	MGA		nonsynonymous SNV	MGA:ENSCAFT00000015349.5:exon14:c.G4894A:p.V1632I	SRP159481	Mammary Tumor
SRR7781065-SRR7781064	chr30	8785141	8785141	A	G	MGA	Missense_Mutation	ENSCAFT00000015348.5	exon15	c.A5393G	p.K1798R	SNP	exonic	MGA		nonsynonymous SNV	MGA:ENSCAFT00000015348.5:exon15:c.A5393G:p.K1798R,MGA:ENSCAFT00000015349.5:exon16:c.A6020G:p.K2007R	SRP159481	Mammary Tumor
SRR7781065-SRR7781064	chr30	8800612	8800612	A	T	MGA	Missense_Mutation	ENSCAFT00000015348.5	exon22	c.A8024T	p.N2675I	SNP	exonic	MGA		nonsynonymous SNV	MGA:ENSCAFT00000015348.5:exon22:c.A8024T:p.N2675I,MGA:ENSCAFT00000015349.5:exon23:c.A8651T:p.N2884I	SRP159481	Mammary Tumor
SRR7781065-SRR7781064	chr30	9666083	9666083	G	C	CDAN1	Missense_Mutation	ENSCAFT00000017777.5	exon8	c.C1217G	p.A406G	SNP	exonic	CDAN1		nonsynonymous SNV	CDAN1:ENSCAFT00000017777.5:exon8:c.C1217G:p.A406G	SRP159481	Mammary Tumor
SRR7781065-SRR7781064	chr31	9519140	9519140	G	A	ROBO2	Missense_Mutation	ENSCAFT00000012728.4	exon8	c.C530T	p.P177L	SNP	exonic	ROBO2		nonsynonymous SNV	ROBO2:ENSCAFT00000012728.4:exon8:c.C530T:p.P177L,ROBO2:ENSCAFT00000012730.5:exon8:c.C530T:p.P177L,ROBO2:ENSCAFT00000060896.1:exon8:c.C1082T:p.P361L,ROBO2:ENSCAFT00000077078.1:exon8:c.C1082T:p.P361L,ROBO2:ENSCAFT00000092179.1:exon8:c.C1130T:p.P377L	SRP159481	Mammary Tumor
SRR7781065-SRR7781064	chr32	37994699	37994699	G	T	SYNPO2	Missense_Mutation	ENSCAFT00000019716.5	exon4	c.G1938T	p.Q646H	SNP	exonic	SYNPO2		nonsynonymous SNV	SYNPO2:ENSCAFT00000019716.5:exon4:c.G1938T:p.Q646H,SYNPO2:ENSCAFT00000063633.1:exon4:c.G1845T:p.Q615H,SYNPO2:ENSCAFT00000073502.1:exon4:c.G1899T:p.Q633H,SYNPO2:ENSCAFT00000075102.1:exon4:c.G1938T:p.Q646H,SYNPO2:ENSCAFT00000076752.1:exon4:c.G1887T:p.Q629H	SRP159481	Mammary Tumor
SRR7781065-SRR7781064	chr34	4042262	4042262	C	G	CCT5	Missense_Mutation	ENSCAFT00000043762.3	exon5	c.G277C	p.A93P	SNP	exonic	CCT5		nonsynonymous SNV	CCT5:ENSCAFT00000043762.3:exon5:c.G277C:p.A93P,CCT5:ENSCAFT00000081439.1:exon5:c.G529C:p.A177P,CCT5:ENSCAFT00000016033.4:exon6:c.G556C:p.A186P,CCT5:ENSCAFT00000093103.1:exon6:c.G490C:p.A164P	SRP159481	Mammary Tumor
SRR7781065-SRR7781064	chr34	5072821	5072821	G	A	SEMA5A	Missense_Mutation	ENSCAFT00000016056.4	exon18	c.G2708A	p.S903N	SNP	exonic	SEMA5A		nonsynonymous SNV	SEMA5A:ENSCAFT00000016056.4:exon18:c.G2708A:p.S903N,SEMA5A:ENSCAFT00000083677.1:exon19:c.G2744A:p.S915N,SEMA5A:ENSCAFT00000089608.1:exon20:c.G2807A:p.S936N	SRP159481	Mammary Tumor
SRR7781065-SRR7781064	chr34	30325549	30325549	C	G	SI	Missense_Mutation	ENSCAFT00000022936.4	exon28	c.G3152C	p.G1051A	SNP	exonic	SI		nonsynonymous SNV	SI:ENSCAFT00000022936.4:exon28:c.G3152C:p.G1051A	SRP159481	Mammary Tumor
SRR7781065-SRR7781064	chr36	28234668	28234668	T	A	FSIP2	Missense_Mutation	ENSCAFT00000022989.4	exon15	c.T1682A	p.I561K	SNP	exonic	FSIP2		nonsynonymous SNV	FSIP2:ENSCAFT00000022989.4:exon15:c.T1682A:p.I561K,FSIP2:ENSCAFT00000073632.1:exon15:c.T1682A:p.I561K,FSIP2:ENSCAFT00000045208.3:exon16:c.T1772A:p.I591K	SRP159481	Mammary Tumor
SRR7781065-SRR7781064	chr37	1518125	1518125	C	A	STAT1	Missense_Mutation	ENSCAFT00000015583.5	exon22	c.G2200T	p.V734L	SNP	exonic	STAT1		nonsynonymous SNV	STAT1:ENSCAFT00000015583.5:exon22:c.G2200T:p.V734L,STAT1:ENSCAFT00000070990.1:exon22:c.G2200T:p.V734L	SRP159481	Mammary Tumor
SRR7781065-SRR7781064	chr37	1518143	1518143	G	A	STAT1	Missense_Mutation	ENSCAFT00000015583.5	exon22	c.C2182T	p.P728S	SNP	exonic	STAT1		nonsynonymous SNV	STAT1:ENSCAFT00000015583.5:exon22:c.C2182T:p.P728S,STAT1:ENSCAFT00000070990.1:exon22:c.C2182T:p.P728S	SRP159481	Mammary Tumor
SRR7781065-SRR7781064	chr38	11057097	11057097	C	A	KCTD3	Missense_Mutation	ENSCAFT00000017052.4	exon15	c.C1564A	p.L522M	SNP	exonic	KCTD3		nonsynonymous SNV	KCTD3:ENSCAFT00000017052.4:exon15:c.C1564A:p.L522M,KCTD3:ENSCAFT00000086623.1:exon16:c.C1681A:p.L561M	SRP159481	Mammary Tumor
SRR7781065-SRR7781064	chr4	25587645	25587645	G	T	ZNF503	Missense_Mutation	ENSCAFT00000024477.5	exon1	c.C217A	p.R73S	SNP	exonic	ZNF503		nonsynonymous SNV	ZNF503:ENSCAFT00000024477.5:exon1:c.C217A:p.R73S	SRP159481	Mammary Tumor
SRR7781065-SRR7781064	chr4	34243471	34243471	T	C	WAPL	Missense_Mutation	ENSCAFT00000025322.5	exon7	c.A2188G	p.K730E	SNP	exonic	WAPL		nonsynonymous SNV	WAPL:ENSCAFT00000025322.5:exon7:c.A2188G:p.K730E,WAPL:ENSCAFT00000069430.1:exon7:c.A1915G:p.K639E,WAPL:ENSCAFT00000025315.4:exon8:c.A2260G:p.K754E,WAPL:ENSCAFT00000025316.5:exon8:c.A2341G:p.K781E	SRP159481	Mammary Tumor
SRR7781065-SRR7781064	chr4	43029911	43029911	C	G	SLIT3	Missense_Mutation	ENSCAFT00000026988.3	exon16	c.C1744G	p.Q582E	SNP	exonic	SLIT3		nonsynonymous SNV	SLIT3:ENSCAFT00000026988.3:exon16:c.C1744G:p.Q582E,SLIT3:ENSCAFT00000092459.1:exon20:c.C1993G:p.Q665E	SRP159481	Mammary Tumor
SRR7781065-SRR7781064	chr5	26318087	26318087	G	A	GRIA4	Missense_Mutation	ENSCAFT00000063028.1	exon11	c.C1904T	p.S635F	SNP	exonic	GRIA4		nonsynonymous SNV	GRIA4:ENSCAFT00000063028.1:exon11:c.C1904T:p.S635F,GRIA4:ENSCAFT00000023554.4:exon12:c.C1958T:p.S653F,GRIA4:ENSCAFT00000023560.4:exon12:c.C1958T:p.S653F	SRP159481	Mammary Tumor
SRR7781065-SRR7781064	chr5	32563427	32563427	T	C	TP53	Missense_Mutation	ENSCAFT00000086831.1	exon5	c.A602G	p.Y201C	SNP	exonic	TP53		nonsynonymous SNV	TP53:ENSCAFT00000086831.1:exon5:c.A602G:p.Y201C,TP53:ENSCAFT00000026465.4:exon7:c.A671G:p.Y224C,TP53:ENSCAFT00000081814.1:exon7:c.A863G:p.Y288C	SRP159481	Mammary Tumor
SRR7781065-SRR7781064	chr5	32575447	32575447	G	T	EFNB3	Missense_Mutation	ENSCAFT00000036506.3	exon1	c.G104T	p.S35I	SNP	exonic	EFNB3		nonsynonymous SNV	EFNB3:ENSCAFT00000036506.3:exon1:c.G104T:p.S35I,EFNB3:ENSCAFT00000026478.5:exon2:c.G104T:p.S35I,EFNB3:ENSCAFT00000069246.1:exon2:c.G104T:p.S35I,EFNB3:ENSCAFT00000073485.1:exon2:c.G104T:p.S35I	SRP159481	Mammary Tumor
SRR7781065-SRR7781064	chr5	32575456	32575456	C	T	EFNB3	Missense_Mutation	ENSCAFT00000036506.3	exon1	c.C113T	p.S38F	SNP	exonic	EFNB3		nonsynonymous SNV	EFNB3:ENSCAFT00000036506.3:exon1:c.C113T:p.S38F,EFNB3:ENSCAFT00000026478.5:exon2:c.C113T:p.S38F,EFNB3:ENSCAFT00000069246.1:exon2:c.C113T:p.S38F,EFNB3:ENSCAFT00000073485.1:exon2:c.C113T:p.S38F	SRP159481	Mammary Tumor
SRR7781065-SRR7781064	chr5	41699799	41699799	G	C	RAI1	Missense_Mutation	ENSCAFT00000029281.6	exon3	c.C3765G	p.F1255L	SNP	exonic	RAI1		nonsynonymous SNV	RAI1:ENSCAFT00000029281.6:exon3:c.C3765G:p.F1255L,RAI1:ENSCAFT00000048471.2:exon3:c.C3765G:p.F1255L,RAI1:ENSCAFT00000069214.1:exon3:c.C3765G:p.F1255L	SRP159481	Mammary Tumor
SRR7781065-SRR7781064	chr5	54515499	54515499	C	A	ACOT11	Missense_Mutation	ENSCAFT00000030224.5	exon12	c.G1156T	p.V386L	SNP	exonic	ACOT11		nonsynonymous SNV	ACOT11:ENSCAFT00000030224.5:exon12:c.G1156T:p.V386L,ACOT11:ENSCAFT00000045798.2:exon12:c.G1138T:p.V380L,ACOT11:ENSCAFT00000092947.1:exon12:c.G1051T:p.V351L	SRP159481	Mammary Tumor
SRR7781065-SRR7781064	chr5	76615634	76615634	C	T	MTSS2	Missense_Mutation	ENSCAFT00000049321.3	exon11	c.G1867A	p.A623T	SNP	exonic	MTSS2		nonsynonymous SNV	MTSS2:ENSCAFT00000049321.3:exon11:c.G1867A:p.A623T,MTSS2:ENSCAFT00000049948.3:exon14:c.G1969A:p.A657T	SRP159481	Mammary Tumor
SRR7781065-SRR7781064	chr6	72305665	72305665	G	A	LRRIQ3	Missense_Mutation	ENSCAFT00000032506.5	exon7	c.G1751A	p.C584Y	SNP	exonic	LRRIQ3		nonsynonymous SNV	LRRIQ3:ENSCAFT00000032506.5:exon7:c.G1751A:p.C584Y	SRP159481	Mammary Tumor
SRR7781065-SRR7781064	chr7	12595498	12595498	G	C	CENPF	Missense_Mutation	ENSCAFT00000020009.4	exon12	c.G2523C	p.E841D	SNP	exonic	CENPF		nonsynonymous SNV	CENPF:ENSCAFT00000020009.4:exon12:c.G2523C:p.E841D,CENPF:ENSCAFT00000043283.2:exon12:c.G2508C:p.E836D	SRP159481	Mammary Tumor
SRR7781065-SRR7781064	chr7	18982186	18982186	T	A	HMCN1	Missense_Mutation	ENSCAFT00000021686.4	exon8	c.T997A	p.F333I	SNP	exonic	HMCN1		nonsynonymous SNV	HMCN1:ENSCAFT00000021686.4:exon8:c.T997A:p.F333I	SRP159481	Mammary Tumor
SRR7781065-SRR7781064	chr7	22669595	22669595	G	C	ASTN1	Missense_Mutation	ENSCAFT00000065001.1	exon11	c.G1839C	p.K613N	SNP	exonic	ASTN1		nonsynonymous SNV	ASTN1:ENSCAFT00000065001.1:exon11:c.G1839C:p.K613N,ASTN1:ENSCAFT00000022524.4:exon12:c.G1914C:p.K638N,ASTN1:ENSCAFT00000088593.1:exon12:c.G1914C:p.K638N	SRP159481	Mammary Tumor
SRR7781065-SRR7781064	chr8	3753172	3753172	C	T	ZFHX2	Missense_Mutation	ENSCAFT00000018471.5	exon8	c.G6034A	p.E2012K	SNP	exonic	ZFHX2		nonsynonymous SNV	ZFHX2:ENSCAFT00000018471.5:exon8:c.G6034A:p.E2012K,ZFHX2:ENSCAFT00000075422.1:exon9:c.G5893A:p.E1965K	SRP159481	Mammary Tumor
SRR7781065-SRR7781064	chr9	4729243	4729243	G	C	TRIM47	Missense_Mutation	ENSCAFT00000007956.5	exon3	c.G1378C	p.V460L	SNP	exonic	TRIM47		nonsynonymous SNV	TRIM47:ENSCAFT00000007956.5:exon3:c.G1378C:p.V460L	SRP159481	Mammary Tumor
SRR7781065-SRR7781064	chr9	38397475	38397475	A	T	CCT6B	Missense_Mutation	ENSCAFT00000049579.2	exon5	c.A489T	p.R163S	SNP	exonic	CCT6B		nonsynonymous SNV	CCT6B:ENSCAFT00000049579.2:exon5:c.A489T:p.R163S,CCT6B:ENSCAFT00000029079.4:exon6:c.A624T:p.R208S,CCT6B:ENSCAFT00000069384.1:exon6:c.A624T:p.R208S,CCT6B:ENSCAFT00000078506.1:exon6:c.A624T:p.R208S	SRP159481	Mammary Tumor
SRR7781065-SRR7781064	chr9	49010174	49010174	T	A	NOTCH1	Missense_Mutation	ENSCAFT00000031242.5	exon26	c.T4697A	p.L1566Q	SNP	exonic	NOTCH1		nonsynonymous SNV	NOTCH1:ENSCAFT00000031242.5:exon26:c.T4697A:p.L1566Q	SRP159481	Mammary Tumor
SRR7781065-SRR7781064	chr9	49428711	49428711	T	C	UBAC1	Missense_Mutation	ENSCAFT00000031346.3	exon2	c.T838C	p.S280P	SNP	exonic	UBAC1		nonsynonymous SNV	UBAC1:ENSCAFT00000031346.3:exon2:c.T838C:p.S280P	SRP159481	Mammary Tumor
SRR7781067-SRR7781066	chr1	21118791	21118791	G	A	C1H18orf54	Missense_Mutation	ENSCAFT00000000238.4	exon2	c.C938T	p.S313F	SNP	exonic	C1H18orf54		nonsynonymous SNV	C1H18orf54:ENSCAFT00000000238.4:exon2:c.C938T:p.S313F,C1H18orf54:ENSCAFT00000066679.1:exon2:c.C848T:p.S283F,C1H18orf54:ENSCAFT00000069450.1:exon2:c.C938T:p.S313F,C1H18orf54:ENSCAFT00000092898.1:exon2:c.C938T:p.S313F	SRP159481	Mammary Tumor
SRR7781067-SRR7781066	chr1	66046803	66046803	A	G	ECHDC1	Missense_Mutation	ENSCAFT00000078703.1	exon2	c.T263C	p.M88T	SNP	exonic	ECHDC1		nonsynonymous SNV	ECHDC1:ENSCAFT00000078703.1:exon2:c.T263C:p.M88T,ECHDC1:ENSCAFT00000001635.4:exon3:c.T227C:p.M76T,ECHDC1:ENSCAFT00000073727.1:exon3:c.T245C:p.M82T,ECHDC1:ENSCAFT00000075912.1:exon3:c.T227C:p.M76T,ECHDC1:ENSCAFT00000085265.1:exon3:c.T485C:p.M162T,ECHDC1:ENSCAFT00000088234.1:exon3:c.T485C:p.M162T,ECHDC1:ENSCAFT00000092586.1:exon3:c.T272C:p.M91T	SRP159481	Mammary Tumor
SRR7781067-SRR7781066	chr10	68162035	68162035	T	C	AAK1	Missense_Mutation	ENSCAFT00000047415.2	exon1	c.A422G	p.Q141R	SNP	exonic	AAK1		nonsynonymous SNV	AAK1:ENSCAFT00000047415.2:exon1:c.A422G:p.Q141R	SRP159481	Mammary Tumor
SRR7781067-SRR7781066	chr11	27474010	27474010	G	C	UHRF2	Missense_Mutation	ENSCAFT00000075537.1	exon16	c.G2334C	p.Q778H	SNP	exonic	UHRF2		nonsynonymous SNV	UHRF2:ENSCAFT00000075537.1:exon16:c.G2334C:p.Q778H	SRP159481	Mammary Tumor
SRR7781067-SRR7781066	chr13	21511500	21511500	T	A	TBC1D31	Missense_Mutation	ENSCAFT00000072373.1	exon3	c.T269A	p.V90E	SNP	exonic	TBC1D31		nonsynonymous SNV	TBC1D31:ENSCAFT00000072373.1:exon3:c.T269A:p.V90E,TBC1D31:ENSCAFT00000086714.1:exon8:c.T1055A:p.V352E,TBC1D31:ENSCAFT00000001523.4:exon10:c.T1685A:p.V562E,TBC1D31:ENSCAFT00000070217.1:exon10:c.T1370A:p.V457E,TBC1D31:ENSCAFT00000081742.1:exon10:c.T1007A:p.V336E,TBC1D31:ENSCAFT00000087289.1:exon10:c.T1685A:p.V562E	SRP159481	Mammary Tumor
SRR7781067-SRR7781066	chr13	37288858	37288858	G	A	ZNF623	Missense_Mutation	ENSCAFT00000044791.1	exon1	c.G913A	p.E305K	SNP	exonic	ZNF623		nonsynonymous SNV	ZNF623:ENSCAFT00000044791.1:exon1:c.G913A:p.E305K	SRP159481	Mammary Tumor
SRR7781067-SRR7781066	chr13	37289138	37289138	G	T	ZNF623	Missense_Mutation	ENSCAFT00000044791.1	exon1	c.G1193T	p.G398V	SNP	exonic	ZNF623		nonsynonymous SNV	ZNF623:ENSCAFT00000044791.1:exon1:c.G1193T:p.G398V	SRP159481	Mammary Tumor
SRR7781067-SRR7781066	chr13	48073677	48073677	G	C	EXOC1L	Missense_Mutation	ENSCAFT00000044258.2	exon1	c.G82C	p.E28Q	SNP	exonic	EXOC1L		nonsynonymous SNV	EXOC1L:ENSCAFT00000044258.2:exon1:c.G82C:p.E28Q	SRP159481	Mammary Tumor
SRR7781067-SRR7781066	chr14	43738282	43738282	G	A	ADCYAP1R1	Missense_Mutation	ENSCAFT00000088621.1	exon8	c.G724A	p.E242K	SNP	exonic	ADCYAP1R1		nonsynonymous SNV	ADCYAP1R1:ENSCAFT00000088621.1:exon8:c.G724A:p.E242K,ADCYAP1R1:ENSCAFT00000005013.5:exon10:c.G790A:p.E264K,ADCYAP1R1:ENSCAFT00000005018.3:exon10:c.G790A:p.E264K,ADCYAP1R1:ENSCAFT00000061862.1:exon10:c.G790A:p.E264K,ADCYAP1R1:ENSCAFT00000067184.1:exon10:c.G790A:p.E264K,ADCYAP1R1:ENSCAFT00000071961.1:exon10:c.G790A:p.E264K	SRP159481	Mammary Tumor
SRR7781067-SRR7781066	chr16	23025190	23025190	G	A	CHRNB3	Missense_Mutation	ENSCAFT00000008790.5	exon5	c.C964T	p.H322Y	SNP	exonic	CHRNB3		nonsynonymous SNV	CHRNB3:ENSCAFT00000008790.5:exon5:c.C964T:p.H322Y	SRP159481	Mammary Tumor
SRR7781067-SRR7781066	chr16	55346474	55346474	G	A	CSMD1	Missense_Mutation	ENSCAFT00000013885.4	exon36	c.C5546T	p.P1849L	SNP	exonic	CSMD1		nonsynonymous SNV	CSMD1:ENSCAFT00000013885.4:exon36:c.C5546T:p.P1849L	SRP159481	Mammary Tumor
SRR7781067-SRR7781066	chr17	8265579	8265579	C	A	GREB1	Missense_Mutation	ENSCAFT00000005749.4	exon4	c.C520A	p.H174N	SNP	exonic	GREB1		nonsynonymous SNV	GREB1:ENSCAFT00000005749.4:exon4:c.C520A:p.H174N,GREB1:ENSCAFT00000050023.3:exon4:c.C520A:p.H174N,GREB1:ENSCAFT00000060971.1:exon4:c.C520A:p.H174N,GREB1:ENSCAFT00000067960.1:exon4:c.C520A:p.H174N,GREB1:ENSCAFT00000073991.1:exon4:c.C280A:p.H94N,GREB1:ENSCAFT00000074904.1:exon4:c.C520A:p.H174N,GREB1:ENSCAFT00000081703.1:exon4:c.C520A:p.H174N	SRP159481	Mammary Tumor
SRR7781067-SRR7781066	chr19	52746040	52746040	G	A	NEB	Missense_Mutation	ENSCAFT00000009249.5	exon104	c.C15485T	p.T5162M	SNP	exonic	NEB		nonsynonymous SNV	NEB:ENSCAFT00000009249.5:exon104:c.C15485T:p.T5162M,NEB:ENSCAFT00000049432.3:exon128:c.C17756T:p.T5919M,NEB:ENSCAFT00000049028.3:exon129:c.C17756T:p.T5919M	SRP159481	Mammary Tumor
SRR7781067-SRR7781066	chr20	11058286	11058286	T	G	GRM7	Missense_Mutation	ENSCAFT00000008998.4	exon1	c.A361C	p.T121P	SNP	exonic	GRM7		nonsynonymous SNV	GRM7:ENSCAFT00000008998.4:exon1:c.A361C:p.T121P,GRM7:ENSCAFT00000036019.4:exon1:c.A361C:p.T121P,GRM7:ENSCAFT00000062397.1:exon1:c.A361C:p.T121P,GRM7:ENSCAFT00000063833.1:exon1:c.A361C:p.T121P,GRM7:ENSCAFT00000068445.1:exon1:c.A361C:p.T121P,GRM7:ENSCAFT00000083045.1:exon1:c.A361C:p.T121P	SRP159481	Mammary Tumor
SRR7781067-SRR7781066	chr20	45525062	45525062	C	T	MYO9B	Missense_Mutation	ENSCAFT00000084731.1	exon21	c.G3616A	p.V1206M	SNP	exonic	MYO9B		nonsynonymous SNV	MYO9B:ENSCAFT00000084731.1:exon21:c.G3616A:p.V1206M,MYO9B:ENSCAFT00000086963.1:exon21:c.G3625A:p.V1209M,MYO9B:ENSCAFT00000024641.5:exon22:c.G3739A:p.V1247M,MYO9B:ENSCAFT00000071951.1:exon22:c.G3715A:p.V1239M,MYO9B:ENSCAFT00000063318.1:exon23:c.G3754A:p.V1252M,MYO9B:ENSCAFT00000079451.1:exon23:c.G3730A:p.V1244M,MYO9B:ENSCAFT00000087824.1:exon23:c.G3829A:p.V1277M,MYO9B:ENSCAFT00000068977.1:exon24:c…	SRP159481	Mammary Tumor
SRR7781067-SRR7781066	chr22	15754868	15754868	C	T	DIAPH3	Missense_Mutation	ENSCAFT00000007901.4	exon23	c.G2773A	p.V925M	SNP	exonic	DIAPH3		nonsynonymous SNV	DIAPH3:ENSCAFT00000007901.4:exon23:c.G2773A:p.V925M,DIAPH3:ENSCAFT00000079181.1:exon23:c.G2836A:p.V946M,DIAPH3:ENSCAFT00000007906.5:exon24:c.G2941A:p.V981M,DIAPH3:ENSCAFT00000045223.3:exon25:c.G2974A:p.V992M	SRP159481	Mammary Tumor
SRR7781067-SRR7781066	chr22	52163694	52163694	G	C	TPP2	Missense_Mutation	ENSCAFT00000048301.3	exon22	c.G2775C	p.K925N	SNP	exonic	TPP2		nonsynonymous SNV	TPP2:ENSCAFT00000048301.3:exon22:c.G2775C:p.K925N,TPP2:ENSCAFT00000090347.1:exon24:c.G3003C:p.K1001N,TPP2:ENSCAFT00000009624.4:exon25:c.G3042C:p.K1014N,TPP2:ENSCAFT00000091513.1:exon25:c.G3042C:p.K1014N	SRP159481	Mammary Tumor
SRR7781067-SRR7781066	chr24	33455185	33455185	C	T	CDH22	Missense_Mutation	ENSCAFT00000016196.5	exon6	c.G1145A	p.R382H	SNP	exonic	CDH22		nonsynonymous SNV	CDH22:ENSCAFT00000016196.5:exon6:c.G1145A:p.R382H	SRP159481	Mammary Tumor
SRR7781067-SRR7781066	chr25	25148522	25148522	G	A	GLRA3	Missense_Mutation	ENSCAFT00000012633.4	exon8	c.C986T	p.S329L	SNP	exonic	GLRA3		nonsynonymous SNV	GLRA3:ENSCAFT00000012633.4:exon8:c.C986T:p.S329L,GLRA3:ENSCAFT00000012641.5:exon8:c.C986T:p.S329L	SRP159481	Mammary Tumor
SRR7781067-SRR7781066	chr27	37307285	37307285	G	A	SLC2A3	Missense_Mutation	ENSCAFT00000086948.1	exon3	c.C32T	p.S11L	SNP	exonic	SLC2A3		nonsynonymous SNV	SLC2A3:ENSCAFT00000086948.1:exon3:c.C32T:p.S11L	SRP159481	Mammary Tumor
SRR7781067-SRR7781066	chr3	32439440	32439440	C	T	OCA2	Missense_Mutation	ENSCAFT00000083330.1	exon13	c.C1409T	p.A470V	SNP	exonic	OCA2		nonsynonymous SNV	OCA2:ENSCAFT00000083330.1:exon13:c.C1409T:p.A470V,OCA2:ENSCAFT00000015763.4:exon15:c.C1526T:p.A509V	SRP159481	Mammary Tumor
SRR7781067-SRR7781066	chr3	53194031	53194031	G	A	GDPGP1	Missense_Mutation	ENSCAFT00000036687.3	exon1	c.G178A	p.A60T	SNP	exonic	GDPGP1		nonsynonymous SNV	GDPGP1:ENSCAFT00000036687.3:exon1:c.G178A:p.A60T	SRP159481	Mammary Tumor
SRR7781067-SRR7781066	chr30	8801245	8801245	G	T	MGA	Missense_Mutation	ENSCAFT00000015348.5	exon22	c.G8657T	p.S2886I	SNP	exonic	MGA		nonsynonymous SNV	MGA:ENSCAFT00000015348.5:exon22:c.G8657T:p.S2886I,MGA:ENSCAFT00000015349.5:exon23:c.G9284T:p.S3095I	SRP159481	Mammary Tumor
SRR7781067-SRR7781066	chr31	32824846	32824846	C	T	KCNJ6	Missense_Mutation	ENSCAFT00000074267.1	exon1	c.G467A	p.R156Q	SNP	exonic	KCNJ6		nonsynonymous SNV	KCNJ6:ENSCAFT00000074267.1:exon1:c.G467A:p.R156Q,KCNJ6:ENSCAFT00000015581.4:exon2:c.G353A:p.R118Q	SRP159481	Mammary Tumor
SRR7781067-SRR7781066	chr32	2259865	2259865	C	T	CNOT6L	Missense_Mutation	ENSCAFT00000059735.1	exon2	c.G122A	p.R41Q	SNP	exonic	CNOT6L		nonsynonymous SNV	CNOT6L:ENSCAFT00000059735.1:exon2:c.G122A:p.R41Q,CNOT6L:ENSCAFT00000068350.1:exon2:c.G122A:p.R41Q,CNOT6L:ENSCAFT00000013823.4:exon3:c.G146A:p.R49Q,CNOT6L:ENSCAFT00000090121.1:exon4:c.G122A:p.R41Q	SRP159481	Mammary Tumor
SRR7781067-SRR7781066	chr33	16530280	16530280	C	G	PHLDB2	Missense_Mutation	ENSCAFT00000016519.4	exon3	c.C356G	p.S119C	SNP	exonic	PHLDB2		nonsynonymous SNV	PHLDB2:ENSCAFT00000016519.4:exon3:c.C356G:p.S119C,PHLDB2:ENSCAFT00000076788.1:exon3:c.C356G:p.S119C	SRP159481	Mammary Tumor
SRR7781067-SRR7781066	chr34	208665	208665	G	A	OTULINL	Missense_Mutation	ENSCAFT00000014282.4	exon5	c.C331T	p.R111W	SNP	exonic	OTULINL		nonsynonymous SNV	OTULINL:ENSCAFT00000014282.4:exon5:c.C331T:p.R111W,OTULINL:ENSCAFT00000014283.4:exon5:c.C388T:p.R130W	SRP159481	Mammary Tumor
SRR7781067-SRR7781066	chr34	17140785	17140785	C	A	ALG3	Missense_Mutation	ENSCAFT00000068765.1	exon1	c.G100T	p.G34C	SNP	exonic	ALG3		nonsynonymous SNV	ALG3:ENSCAFT00000068765.1:exon1:c.G100T:p.G34C	SRP159481	Mammary Tumor
SRR7781067-SRR7781066	chr4	22967818	22967818	C	A	DNAJB12	Missense_Mutation	ENSCAFT00000022966.4	exon8	c.G1037T	p.R346L	SNP	exonic	DNAJB12		nonsynonymous SNV	DNAJB12:ENSCAFT00000022966.4:exon8:c.G1037T:p.R346L	SRP159481	Mammary Tumor
SRR7781067-SRR7781066	chr5	8503737	8503737	G	A	CDON	Missense_Mutation	ENSCAFT00000063444.1	exon12	c.G2329A	p.D777N	SNP	exonic	CDON		nonsynonymous SNV	CDON:ENSCAFT00000063444.1:exon12:c.G2329A:p.D777N,CDON:ENSCAFT00000016704.4:exon13:c.G2536A:p.D846N,CDON:ENSCAFT00000086881.1:exon13:c.G2680A:p.D894N,CDON:ENSCAFT00000078715.1:exon14:c.G2596A:p.D866N	SRP159481	Mammary Tumor
SRR7781067-SRR7781066	chr5	29326110	29326110	C	T	BIRC3	Missense_Mutation	ENSCAFT00000079112.1	exon5	c.G1639A	p.E547K	SNP	exonic	BIRC3		nonsynonymous SNV	BIRC3:ENSCAFT00000079112.1:exon5:c.G1639A:p.E547K,BIRC3:ENSCAFT00000092941.1:exon5:c.G1639A:p.E547K,BIRC3:ENSCAFT00000024001.3:exon6:c.G1546A:p.E516K	SRP159481	Mammary Tumor
SRR7781067-SRR7781066	chr5	77119824	77119824	C	T	CMTR2	Missense_Mutation	ENSCAFT00000032126.3	exon1	c.G1441A	p.E481K	SNP	exonic	CMTR2		nonsynonymous SNV	CMTR2:ENSCAFT00000032126.3:exon1:c.G1441A:p.E481K	SRP159481	Mammary Tumor
SRR7781067-SRR7781066	chr12	1470833	1470833	A	G	TNXB	Missense_Mutation	ENSCAFT00000046665.2	exon20	c.T7133C	p.L2378P	SNP	exonic	TNXB		nonsynonymous SNV	TNXB:ENSCAFT00000046665.2:exon20:c.T7133C:p.L2378P,TNXB:ENSCAFT00000001166.6:exon21:c.T7439C:p.L2480P	SRP159481	Mammary Tumor
SRR7781068-SRR7780961	chr1	64193294	64193294	T	C	TPD52L1	Missense_Mutation	ENSCAFT00000001582.5	exon3	c.T287C	p.M96T	SNP	exonic	TPD52L1		nonsynonymous SNV	TPD52L1:ENSCAFT00000001582.5:exon3:c.T287C:p.M96T,TPD52L1:ENSCAFT00000013354.4:exon3:c.T287C:p.M96T,TPD52L1:ENSCAFT00000060760.1:exon3:c.T287C:p.M96T,TPD52L1:ENSCAFT00000065205.1:exon3:c.T203C:p.M68T,TPD52L1:ENSCAFT00000087751.1:exon3:c.T287C:p.M96T,TPD52L1:ENSCAFT00000092294.1:exon3:c.T287C:p.M96T	SRP159481	Mammary Tumor
SRR7781068-SRR7780961	chr1	114358617	114358617	T	C	ACTN4	Missense_Mutation	ENSCAFT00000074529.1	exon8	c.A1073G	p.N358S	SNP	exonic	ACTN4		nonsynonymous SNV	ACTN4:ENSCAFT00000074529.1:exon8:c.A1073G:p.N358S,ACTN4:ENSCAFT00000071394.1:exon11:c.A1586G:p.N529S,ACTN4:ENSCAFT00000009417.3:exon18:c.A2243G:p.N748S,ACTN4:ENSCAFT00000009433.5:exon18:c.A2243G:p.N748S,ACTN4:ENSCAFT00000064965.1:exon18:c.A2243G:p.N748S,ACTN4:ENSCAFT00000084611.1:exon18:c.A2243G:p.N748S	SRP159481	Mammary Tumor
SRR7781068-SRR7780961	chr1	115853866	115853866	A	T	ZNF793	Missense_Mutation	ENSCAFT00000044392.2	exon4	c.A564T	p.E188D	SNP	exonic	ZNF793		nonsynonymous SNV	ZNF793:ENSCAFT00000044392.2:exon4:c.A564T:p.E188D	SRP159481	Mammary Tumor
SRR7781068-SRR7780961	chr1	121781531	121781531	C	T	PLEKHF1	Missense_Mutation	ENSCAFT00000012193.4	exon1	c.G1048A	p.A350T	SNP	exonic	PLEKHF1		nonsynonymous SNV	PLEKHF1:ENSCAFT00000012193.4:exon1:c.G1048A:p.A350T	SRP159481	Mammary Tumor
SRR7781068-SRR7780961	chr10	1561247	1561247	C	G	INHBE	Missense_Mutation	ENSCAFT00000045533.2	exon2	c.C238G	p.Q80E	SNP	exonic	INHBE		nonsynonymous SNV	INHBE:ENSCAFT00000045533.2:exon2:c.C238G:p.Q80E,INHBE:ENSCAFT00000082110.1:exon2:c.C343G:p.Q115E	SRP159481	Mammary Tumor
SRR7781068-SRR7780961	chr10	5745050	5745050	C	G	MON2	Missense_Mutation	ENSCAFT00000091121.1	exon21	c.C3374G	p.T1125R	SNP	exonic	MON2		nonsynonymous SNV	MON2:ENSCAFT00000091121.1:exon21:c.C3374G:p.T1125R,MON2:ENSCAFT00000000513.5:exon26:c.C3992G:p.T1331R,MON2:ENSCAFT00000061231.1:exon26:c.C3992G:p.T1331R,MON2:ENSCAFT00000048388.2:exon27:c.C3995G:p.T1332R	SRP159481	Mammary Tumor
SRR7781068-SRR7780961	chr12	202453	202453	A	G	MED23	Missense_Mutation	ENSCAFT00000000597.4	exon7	c.A542G	p.Y181C	SNP	exonic	MED23		nonsynonymous SNV	MED23:ENSCAFT00000000597.4:exon7:c.A542G:p.Y181C,MED23:ENSCAFT00000068650.1:exon7:c.A542G:p.Y181C,MED23:ENSCAFT00000082082.1:exon7:c.A470G:p.Y157C,MED23:ENSCAFT00000086253.1:exon7:c.A551G:p.Y184C,MED23:ENSCAFT00000087725.1:exon7:c.A551G:p.Y184C,MED23:ENSCAFT00000088672.1:exon7:c.A470G:p.Y157C	SRP159481	Mammary Tumor
SRR7781068-SRR7780961	chr12	1577065	1577065	A	T	AGER	Missense_Mutation	ENSCAFT00000001212.5	exon1	c.T47A	p.L16H	SNP	exonic	AGER		nonsynonymous SNV	AGER:ENSCAFT00000001212.5:exon1:c.T47A:p.L16H,AGER:ENSCAFT00000001214.4:exon1:c.T47A:p.L16H,AGER:ENSCAFT00000037333.4:exon1:c.T47A:p.L16H	SRP159481	Mammary Tumor
SRR7781068-SRR7780961	chr12	10690229	10690229	C	T	TAF8	Missense_Mutation	ENSCAFT00000002559.4	exon2	c.C158T	p.A53V	SNP	exonic	TAF8		nonsynonymous SNV	TAF8:ENSCAFT00000002559.4:exon2:c.C158T:p.A53V,TAF8:ENSCAFT00000061215.1:exon2:c.C158T:p.A53V	SRP159481	Mammary Tumor
SRR7781068-SRR7780961	chr14	1098355	1098355	C	G	SNAP47	Missense_Mutation	ENSCAFT00000039428.3	exon2	c.G124C	p.G42R	SNP	exonic	SNAP47		nonsynonymous SNV	SNAP47:ENSCAFT00000039428.3:exon2:c.G124C:p.G42R,SNAP47:ENSCAFT00000064082.1:exon2:c.G124C:p.G42R	SRP159481	Mammary Tumor
SRR7781068-SRR7780961	chr15	55937860	55937860	G	A	FNIP2	Missense_Mutation	ENSCAFT00000061539.1	exon13	c.G2468A	p.G823D	SNP	exonic	FNIP2		nonsynonymous SNV	FNIP2:ENSCAFT00000061539.1:exon13:c.G2468A:p.G823D,FNIP2:ENSCAFT00000080026.1:exon13:c.G2408A:p.G803D,FNIP2:ENSCAFT00000013815.4:exon14:c.G2453A:p.G818D,FNIP2:ENSCAFT00000081282.1:exon14:c.G2540A:p.G847D,FNIP2:ENSCAFT00000087671.1:exon14:c.G2249A:p.G750D	SRP159481	Mammary Tumor
SRR7781068-SRR7780961	chr15	59607971	59607971	G	A	NPY5R	Missense_Mutation	ENSCAFT00000046926.2	exon1	c.G1061A	p.R354H	SNP	exonic	NPY5R		nonsynonymous SNV	NPY5R:ENSCAFT00000046926.2:exon1:c.G1061A:p.R354H	SRP159481	Mammary Tumor
SRR7781068-SRR7780961	chr17	847872	847872	C	T	PXDN	Missense_Mutation	ENSCAFT00000005177.4	exon16	c.G3281A	p.R1094Q	SNP	exonic	PXDN		nonsynonymous SNV	PXDN:ENSCAFT00000005177.4:exon16:c.G3281A:p.R1094Q	SRP159481	Mammary Tumor
SRR7781068-SRR7780961	chr17	20527343	20527343	C	G	OTOF	Missense_Mutation	ENSCAFT00000007145.3	exon37	c.G4540C	p.D1514H	SNP	exonic	OTOF		nonsynonymous SNV	OTOF:ENSCAFT00000007145.3:exon37:c.G4540C:p.D1514H,OTOF:ENSCAFT00000043731.3:exon37:c.G4540C:p.D1514H	SRP159481	Mammary Tumor
SRR7781068-SRR7780961	chr26	22064499	22064499	G	A	TTC28	Missense_Mutation	ENSCAFT00000018932.4	exon10	c.C1156T	p.H386Y	SNP	exonic	TTC28		nonsynonymous SNV	TTC28:ENSCAFT00000018932.4:exon10:c.C1156T:p.H386Y,TTC28:ENSCAFT00000068567.1:exon10:c.C1018T:p.H340Y,TTC28:ENSCAFT00000079239.1:exon10:c.C1018T:p.H340Y	SRP159481	Mammary Tumor
SRR7781068-SRR7780961	chr26	22542091	22542091	G	A	EMID1	Missense_Mutation	ENSCAFT00000019222.3	exon9	c.G686A	p.G229E	SNP	exonic	EMID1		nonsynonymous SNV	EMID1:ENSCAFT00000019222.3:exon9:c.G686A:p.G229E,EMID1:ENSCAFT00000019225.5:exon9:c.G686A:p.G229E,EMID1:ENSCAFT00000074231.1:exon9:c.G686A:p.G229E	SRP159481	Mammary Tumor
SRR7781068-SRR7780961	chr27	1924112	1924112	G	A	ESPL1	Missense_Mutation	ENSCAFT00000011275.4	exon11	c.C2395T	p.R799W	SNP	exonic	ESPL1		nonsynonymous SNV	ESPL1:ENSCAFT00000011275.4:exon11:c.C2395T:p.R799W	SRP159481	Mammary Tumor
SRR7781068-SRR7780961	chr27	38625484	38625484	G	C	SCNN1A	Missense_Mutation	ENSCAFT00000024124.3	exon2	c.G400C	p.D134H	SNP	exonic	SCNN1A		nonsynonymous SNV	SCNN1A:ENSCAFT00000024124.3:exon2:c.G400C:p.D134H,SCNN1A:ENSCAFT00000047393.3:exon4:c.G781C:p.D261H,SCNN1A:ENSCAFT00000075081.1:exon5:c.G583C:p.D195H,SCNN1A:ENSCAFT00000081905.1:exon5:c.G583C:p.D195H	SRP159481	Mammary Tumor
SRR7781068-SRR7780961	chr28	15681711	15681711	G	T	INA	Missense_Mutation	ENSCAFT00000016481.5	exon2	c.G1121T	p.R374L	SNP	exonic	INA		nonsynonymous SNV	INA:ENSCAFT00000016481.5:exon2:c.G1121T:p.R374L	SRP159481	Mammary Tumor
SRR7781068-SRR7780961	chr28	40869136	40869136	C	T	TUBGCP2	Missense_Mutation	ENSCAFT00000043376.2	exon12	c.G1882A	p.E628K	SNP	exonic	TUBGCP2		nonsynonymous SNV	TUBGCP2:ENSCAFT00000043376.2:exon12:c.G1882A:p.E628K,TUBGCP2:ENSCAFT00000063316.1:exon14:c.G2083A:p.E695K	SRP159481	Mammary Tumor
SRR7781068-SRR7780961	chr3	52591935	52591935	G	A	TICRR	Missense_Mutation	ENSCAFT00000019004.4	exon3	c.G1165A	p.A389T	SNP	exonic	TICRR		nonsynonymous SNV	TICRR:ENSCAFT00000019004.4:exon3:c.G1165A:p.A389T,TICRR:ENSCAFT00000062145.1:exon3:c.G1165A:p.A389T,TICRR:ENSCAFT00000071492.1:exon3:c.G1165A:p.A389T	SRP159481	Mammary Tumor
SRR7781068-SRR7780961	chr30	37686294	37686294	G	C	ARID3B	Missense_Mutation	ENSCAFT00000072420.1	exon4	c.G705C	p.E235D	SNP	exonic	ARID3B		nonsynonymous SNV	ARID3B:ENSCAFT00000072420.1:exon4:c.G705C:p.E235D,ARID3B:ENSCAFT00000028463.3:exon7:c.G777C:p.E259D,ARID3B:ENSCAFT00000085255.1:exon7:c.G900C:p.E300D	SRP159481	Mammary Tumor
SRR7781068-SRR7780961	chr31	26821410	26821410	G	C	HUNK	Missense_Mutation	ENSCAFT00000014087.4	exon9	c.G1064C	p.R355T	SNP	exonic	HUNK		nonsynonymous SNV	HUNK:ENSCAFT00000014087.4:exon9:c.G1064C:p.R355T	SRP159481	Mammary Tumor
SRR7781068-SRR7780961	chr33	24794622	24794622	A	C	POLQ	Missense_Mutation	ENSCAFT00000018256.4	exon14	c.T2380G	p.F794V	SNP	exonic	POLQ		nonsynonymous SNV	POLQ:ENSCAFT00000018256.4:exon14:c.T2380G:p.F794V	SRP159481	Mammary Tumor
SRR7781068-SRR7780961	chr4	58723264	58723264	G	A	TCOF1	Missense_Mutation	ENSCAFT00000035992.4	exon8	c.C997T	p.P333S	SNP	exonic	TCOF1		nonsynonymous SNV	TCOF1:ENSCAFT00000035992.4:exon8:c.C997T:p.P333S	SRP159481	Mammary Tumor
SRR7781068-SRR7780961	chr5	9007063	9007063	G	T	FEZ1	Missense_Mutation	ENSCAFT00000017347.4	exon2	c.G118T	p.D40Y	SNP	exonic	FEZ1		nonsynonymous SNV	FEZ1:ENSCAFT00000017347.4:exon2:c.G118T:p.D40Y,FEZ1:ENSCAFT00000084424.1:exon2:c.G118T:p.D40Y,FEZ1:ENSCAFT00000091069.1:exon2:c.G118T:p.D40Y	SRP159481	Mammary Tumor
SRR7781068-SRR7780961	chr5	68314186	68314186	C	T	OSGIN1	Missense_Mutation	ENSCAFT00000067251.1	exon16	c.G901A	p.G301S	SNP	exonic	OSGIN1		nonsynonymous SNV	OSGIN1:ENSCAFT00000067251.1:exon16:c.G901A:p.G301S,OSGIN1:ENSCAFT00000031781.4:exon17:c.G1612A:p.G538S	SRP159481	Mammary Tumor
SRR7781068-SRR7780961	chr7	10800971	10800971	G	C	FAM71A	Missense_Mutation	ENSCAFT00000019591.4	exon1	c.G796C	p.A266P	SNP	exonic	FAM71A		nonsynonymous SNV	FAM71A:ENSCAFT00000019591.4:exon1:c.G796C:p.A266P	SRP159481	Mammary Tumor
SRR7781068-SRR7780961	chr7	35835415	35835415	C	T	HNRNPU	Missense_Mutation	ENSCAFT00000087792.1	exon8	c.G1321A	p.G441S	SNP	exonic	HNRNPU		nonsynonymous SNV	HNRNPU:ENSCAFT00000087792.1:exon8:c.G1321A:p.G441S,HNRNPU:ENSCAFT00000043229.3:exon10:c.G1843A:p.G615S,HNRNPU:ENSCAFT00000025085.6:exon12:c.G2086A:p.G696S,HNRNPU:ENSCAFT00000083035.1:exon12:c.G2041A:p.G681S	SRP159481	Mammary Tumor
SRR7781068-SRR7780961	chr8	796578	796578	A	G	OR4L1	Missense_Mutation	ENSCAFT00000017186.3	exon1	c.T257C	p.L86P	SNP	exonic	OR4L1		nonsynonymous SNV	OR4L1:ENSCAFT00000017186.3:exon1:c.T257C:p.L86P	SRP159481	Mammary Tumor
SRR7781068-SRR7780961	chr8	59892760	59892760	C	T	EML5	Missense_Mutation	ENSCAFT00000075565.1	exon22	c.G3274A	p.G1092R	SNP	exonic	EML5		nonsynonymous SNV	EML5:ENSCAFT00000075565.1:exon22:c.G3274A:p.G1092R,EML5:ENSCAFT00000064530.1:exon23:c.G3256A:p.G1086R,EML5:ENSCAFT00000089747.1:exon23:c.G3301A:p.G1101R,EML5:ENSCAFT00000027674.5:exon24:c.G3469A:p.G1157R,EML5:ENSCAFT00000027682.4:exon24:c.G3469A:p.G1157R,EML5:ENSCAFT00000071389.1:exon24:c.G3469A:p.G1157R	SRP159481	Mammary Tumor
SRR7781068-SRR7780961	chr9	42873825	42873825	A	G	SUPT6H	Missense_Mutation	ENSCAFT00000029797.5	exon6	c.A548G	p.D183G	SNP	exonic	SUPT6H		nonsynonymous SNV	SUPT6H:ENSCAFT00000029797.5:exon6:c.A548G:p.D183G,SUPT6H:ENSCAFT00000078378.1:exon6:c.A548G:p.D183G,SUPT6H:ENSCAFT00000083625.1:exon6:c.A548G:p.D183G	SRP159481	Mammary Tumor
SRR7781068-SRR7780961	chr21	27089528	27089528	C	T	OR51F23	Missense_Mutation	ENSCAFT00000076505.1	exon1	c.G541A	p.V181M	SNP	exonic	OR51F23		nonsynonymous SNV	OR51F23:ENSCAFT00000076505.1:exon1:c.G541A:p.V181M	SRP159481	Mammary Tumor
SRR7781068-SRR7780961	chr21	27089569	27089569	C	T	OR51F23	Missense_Mutation	ENSCAFT00000076505.1	exon1	c.G500A	p.R167H	SNP	exonic	OR51F23		nonsynonymous SNV	OR51F23:ENSCAFT00000076505.1:exon1:c.G500A:p.R167H	SRP159481	Mammary Tumor
SRR7781074-SRR7781071	chr17	39638280	39638280	C	T	CAPG	Missense_Mutation	ENSCAFT00000012437.4	exon8	c.C1016T	p.A339V	SNP	exonic	CAPG		nonsynonymous SNV	CAPG:ENSCAFT00000012437.4:exon8:c.C1016T:p.A339V,CAPG:ENSCAFT00000065994.1:exon8:c.C1016T:p.A339V,CAPG:ENSCAFT00000074490.1:exon8:c.C803T:p.A268V	SRP159481	Mammary Tumor
SRR7781074-SRR7781071	chr18	352356	352356	G	T	ABCA13	Missense_Mutation	ENSCAFT00000005349.5	exon50	c.G13342T	p.D4448Y	SNP	exonic	ABCA13		nonsynonymous SNV	ABCA13:ENSCAFT00000005349.5:exon50:c.G13342T:p.D4448Y	SRP159481	Mammary Tumor
SRR7781074-SRR7781071	chr18	40176995	40176995	T	C	OR4P7	Missense_Mutation	ENSCAFT00000012968.4	exon1	c.T32C	p.I11T	SNP	exonic	OR4P7		nonsynonymous SNV	OR4P7:ENSCAFT00000012968.4:exon1:c.T32C:p.I11T	SRP159481	Mammary Tumor
SRR7781074-SRR7781071	chr20	43555397	43555397	C	T	ZNF502	Missense_Mutation	ENSCAFT00000044381.2	exon4	c.G179A	p.G60E	SNP	exonic	ZNF502		nonsynonymous SNV	ZNF502:ENSCAFT00000044381.2:exon4:c.G179A:p.G60E	SRP159481	Mammary Tumor
SRR7781074-SRR7781071	chr20	43645543	43645543	G	A	GMIP	Missense_Mutation	ENSCAFT00000022493.5	exon20	c.G2693A	p.R898H	SNP	exonic	GMIP		nonsynonymous SNV	GMIP:ENSCAFT00000022493.5:exon20:c.G2693A:p.R898H,GMIP:ENSCAFT00000047800.2:exon21:c.G3098A:p.R1033H	SRP159481	Mammary Tumor
SRR7781074-SRR7781071	chr30	15936698	15936698	C	T	ATP8B4	Missense_Mutation	ENSCAFT00000023794.4	exon19	c.G1963A	p.G655S	SNP	exonic	ATP8B4		nonsynonymous SNV	ATP8B4:ENSCAFT00000023794.4:exon19:c.G1963A:p.G655S	SRP159481	Mammary Tumor
SRR7781074-SRR7781071	chr30	37900428	37900428	C	T	ULK3	Missense_Mutation	ENSCAFT00000028511.4	exon9	c.G889A	p.E297K	SNP	exonic	ULK3		nonsynonymous SNV	ULK3:ENSCAFT00000028511.4:exon9:c.G889A:p.E297K	SRP159481	Mammary Tumor
SRR7781074-SRR7781071	chr32	21872121	21872121	T	C	DNAJB14	Missense_Mutation	ENSCAFT00000016865.4	exon2	c.A239G	p.D80G	SNP	exonic	DNAJB14		nonsynonymous SNV	DNAJB14:ENSCAFT00000016865.4:exon2:c.A239G:p.D80G,DNAJB14:ENSCAFT00000068965.1:exon2:c.A239G:p.D80G	SRP159481	Mammary Tumor
SRR7781074-SRR7781071	chr5	32563715	32563715	T	C	TP53	Missense_Mutation	ENSCAFT00000086831.1	exon4	c.A536G	p.H179R	SNP	exonic	TP53		nonsynonymous SNV	TP53:ENSCAFT00000086831.1:exon4:c.A536G:p.H179R,TP53:ENSCAFT00000026465.4:exon6:c.A605G:p.H202R,TP53:ENSCAFT00000081814.1:exon6:c.A797G:p.H266R	SRP159481	Mammary Tumor
SRR7781074-SRR7781071	chr9	6058822	6058822	C	T	KIF19	Missense_Mutation	ENSCAFT00000048807.2	exon10	c.G1190A	p.R397Q	SNP	exonic	KIF19		nonsynonymous SNV	KIF19:ENSCAFT00000048807.2:exon10:c.G1190A:p.R397Q	SRP159481	Mammary Tumor
SRR7781074-SRR7781071	chr9	49017144	49017144	C	T	NOTCH1	Missense_Mutation	ENSCAFT00000031242.5	exon34	c.C7565T	p.P2522L	SNP	exonic	NOTCH1		nonsynonymous SNV	NOTCH1:ENSCAFT00000031242.5:exon34:c.C7565T:p.P2522L	SRP159481	Mammary Tumor
SRR7781079-SRR7781080	chr1	106012209	106012209	C	A	KLK1	Missense_Mutation	ENSCAFT00000079204.1	exon4	c.C547A	p.L183I	SNP	exonic	KLK1		nonsynonymous SNV	KLK1:ENSCAFT00000079204.1:exon4:c.C547A:p.L183I	SRP159481	Mammary Tumor
SRR7781079-SRR7781080	chr23	3894947	3894947	C	T	TRIM71	Missense_Mutation	ENSCAFT00000070595.1	exon3	c.G1139A	p.R380H	SNP	exonic	TRIM71		nonsynonymous SNV	TRIM71:ENSCAFT00000070595.1:exon3:c.G1139A:p.R380H,TRIM71:ENSCAFT00000093660.1:exon3:c.G1172A:p.R391H,TRIM71:ENSCAFT00000039591.3:exon4:c.G1307A:p.R436H	SRP159481	Mammary Tumor
SRR7781079-SRR7781080	chr12	14849958	14849958	A	G	TDRD6	Missense_Mutation	ENSCAFT00000003223.5	exon1	c.A76G	p.S26G	SNP	exonic	TDRD6		nonsynonymous SNV	TDRD6:ENSCAFT00000003223.5:exon1:c.A76G:p.S26G	SRP159481	Mammary Tumor
SRR7781081-SRR7781082	chr1	113809541	113809541	C	T	PLEKHG2	Missense_Mutation	ENSCAFT00000046253.3	exon2	c.G295A	p.A99T	SNP	exonic	PLEKHG2		nonsynonymous SNV	PLEKHG2:ENSCAFT00000046253.3:exon2:c.G295A:p.A99T,PLEKHG2:ENSCAFT00000049495.2:exon2:c.G292A:p.A98T	SRP159481	Mammary Tumor
SRR7781081-SRR7781082	chr15	14105119	14105119	G	A	LRRC41	Missense_Mutation	ENSCAFT00000006845.4	exon4	c.G887A	p.R296Q	SNP	exonic	LRRC41		nonsynonymous SNV	LRRC41:ENSCAFT00000006845.4:exon4:c.G887A:p.R296Q,LRRC41:ENSCAFT00000073961.1:exon4:c.G749A:p.R250Q,LRRC41:ENSCAFT00000089138.1:exon4:c.G887A:p.R296Q,LRRC41:ENSCAFT00000090511.1:exon4:c.G887A:p.R296Q	SRP159481	Mammary Tumor
SRR7781081-SRR7781082	chr17	19970120	19970120	A	G	ASXL2	Missense_Mutation	ENSCAFT00000006807.5	exon3	c.T190C	p.S64P	SNP	exonic	ASXL2		nonsynonymous SNV	ASXL2:ENSCAFT00000006807.5:exon3:c.T190C:p.S64P,ASXL2:ENSCAFT00000071328.1:exon3:c.T190C:p.S64P,ASXL2:ENSCAFT00000093614.1:exon4:c.T190C:p.S64P	SRP159481	Mammary Tumor
SRR7781081-SRR7781082	chr34	19699392	19699392	C	T	MASP1	Missense_Mutation	ENSCAFT00000021980.4	exon11	c.G1328A	p.R443Q	SNP	exonic	MASP1		nonsynonymous SNV	MASP1:ENSCAFT00000021980.4:exon11:c.G1328A:p.R443Q	SRP159481	Mammary Tumor
SRR7781083-SRR7781084	chr20	3811776	3811776	T	C	HDAC11	Missense_Mutation	ENSCAFT00000087053.1	exon3	c.T293C	p.V98A	SNP	exonic	HDAC11		nonsynonymous SNV	HDAC11:ENSCAFT00000087053.1:exon3:c.T293C:p.V98A,HDAC11:ENSCAFT00000007075.4:exon6:c.T530C:p.V177A,HDAC11:ENSCAFT00000093370.1:exon6:c.T503C:p.V168A,HDAC11:ENSCAFT00000071888.1:exon7:c.T449C:p.V150A,HDAC11:ENSCAFT00000075456.1:exon7:c.T449C:p.V150A,HDAC11:ENSCAFT00000083295.1:exon7:c.T503C:p.V168A	SRP159481	Mammary Tumor
SRR7781083-SRR7781084	chr12	66353316	66353316	T	C	MICAL1	Missense_Mutation	ENSCAFT00000084555.1	exon15	c.A2075G	p.E692G	SNP	exonic	MICAL1		nonsynonymous SNV	MICAL1:ENSCAFT00000084555.1:exon15:c.A2075G:p.E692G,MICAL1:ENSCAFT00000006147.4:exon16:c.A2144G:p.E715G,MICAL1:ENSCAFT00000076653.1:exon16:c.A2027G:p.E676G,MICAL1:ENSCAFT00000086929.1:exon17:c.A2165G:p.E722G	SRP159481	Mammary Tumor
SRR7781083-SRR7781084	chr26	38700681	38700681	A	G	ACTA2	Missense_Mutation	ENSCAFT00000090130.1	exon9	c.T1127C	p.V376A	SNP	exonic	ACTA2		nonsynonymous SNV	ACTA2:ENSCAFT00000090130.1:exon9:c.T1127C:p.V376A	SRP159481	Mammary Tumor
SRR7781085-SRR7781086	chr15	54198391	54198391	T	A	PDGFC	Missense_Mutation	ENSCAFT00000013648.5	exon4	c.A395T	p.Y132F	SNP	exonic	PDGFC		nonsynonymous SNV	PDGFC:ENSCAFT00000013648.5:exon4:c.A395T:p.Y132F	SRP159481	Mammary Tumor
SRR7781085-SRR7781086	chr17	20806534	20806534	G	A	SLC35F6	Missense_Mutation	ENSCAFT00000063397.1	exon5	c.G968A	p.R323H	SNP	exonic	SLC35F6		nonsynonymous SNV	SLC35F6:ENSCAFT00000063397.1:exon5:c.G968A:p.R323H,SLC35F6:ENSCAFT00000048138.2:exon6:c.G875A:p.R292H	SRP159481	Mammary Tumor
SRR7781085-SRR7781086	chr29	3992003	3992003	C	T	ST18	Missense_Mutation	ENSCAFT00000062004.1	exon13	c.G2285A	p.G762E	SNP	exonic	ST18		nonsynonymous SNV	ST18:ENSCAFT00000062004.1:exon13:c.G2285A:p.G762E,ST18:ENSCAFT00000071654.1:exon13:c.G2114A:p.G705E,ST18:ENSCAFT00000010894.4:exon14:c.G2360A:p.G787E,ST18:ENSCAFT00000078043.1:exon14:c.G2360A:p.G787E	SRP159481	Mammary Tumor
SRR7781085-SRR7781086	chr30	11577191	11577191	A	T	DUOX1	Missense_Mutation	ENSCAFT00000021757.3	exon26	c.A3047T	p.E1016V	SNP	exonic	DUOX1		nonsynonymous SNV	DUOX1:ENSCAFT00000021757.3:exon26:c.A3047T:p.E1016V,DUOX1:ENSCAFT00000073501.1:exon26:c.A3011T:p.E1004V,DUOX1:ENSCAFT00000074468.1:exon27:c.A3047T:p.E1016V	SRP159481	Mammary Tumor
SRR7781085-SRR7781086	chr30	28232868	28232868	C	T	HERC1	Missense_Mutation	ENSCAFT00000026962.5	exon50	c.G9665A	p.R3222Q	SNP	exonic	HERC1		nonsynonymous SNV	HERC1:ENSCAFT00000026962.5:exon50:c.G9665A:p.R3222Q	SRP159481	Mammary Tumor
SRR7781085-SRR7781086	chr31	34135446	34135446	C	T	BRWD1	Missense_Mutation	ENSCAFT00000027485.5	exon39	c.G5431A	p.E1811K	SNP	exonic	BRWD1		nonsynonymous SNV	BRWD1:ENSCAFT00000027485.5:exon39:c.G5431A:p.E1811K,BRWD1:ENSCAFT00000084567.1:exon39:c.G5356A:p.E1786K,BRWD1:ENSCAFT00000015967.4:exon40:c.G5491A:p.E1831K,BRWD1:ENSCAFT00000071956.1:exon40:c.G5491A:p.E1831K	SRP159481	Mammary Tumor
SRR7781085-SRR7781086	chr9	11539605	11539605	G	A	KCNH6	Missense_Mutation	ENSCAFT00000020615.4	exon2	c.G242A	p.R81H	SNP	exonic	KCNH6		nonsynonymous SNV	KCNH6:ENSCAFT00000020615.4:exon2:c.G242A:p.R81H	SRP159481	Mammary Tumor
SRR7781092-SRR7781091	chr12	2518026	2518026	C	T	DLA-DMA	Missense_Mutation	ENSCAFT00000036735.3	exon2	c.G316A	p.A106T	SNP	exonic	DLA-DMA		nonsynonymous SNV	DLA-DMA:ENSCAFT00000036735.3:exon2:c.G316A:p.A106T,DLA-DMA:ENSCAFT00000001328.4:exon3:c.G601A:p.A201T,DLA-DMA:ENSCAFT00000074446.1:exon3:c.G538A:p.A180T	SRP159481	Mammary Tumor
SRR7781092-SRR7781091	chr20	47141242	47141242	T	G	SLC1A6	Missense_Mutation	ENSCAFT00000076560.1	exon6	c.T1139G	p.L380R	SNP	exonic	SLC1A6		nonsynonymous SNV	SLC1A6:ENSCAFT00000076560.1:exon6:c.T1139G:p.L380R,SLC1A6:ENSCAFT00000025669.4:exon7:c.T1526G:p.L509R,SLC1A6:ENSCAFT00000093119.1:exon7:c.T1103G:p.L368R,SLC1A6:ENSCAFT00000062520.1:exon8:c.T1337G:p.L446R	SRP159481	Mammary Tumor
SRR7781092-SRR7781091	chr5	19095426	19095426	G	A	ZBTB16	Missense_Mutation	ENSCAFT00000021475.4	exon4	c.C1502T	p.A501V	SNP	exonic	ZBTB16		nonsynonymous SNV	ZBTB16:ENSCAFT00000021475.4:exon4:c.C1502T:p.A501V	SRP159481	Mammary Tumor
SRR7781092-SRR7781091	chr5	32537826	32537826	T	G	SHBG	Missense_Mutation	ENSCAFT00000026433.4	exon3	c.T356G	p.V119G	SNP	exonic	SHBG		nonsynonymous SNV	SHBG:ENSCAFT00000026433.4:exon3:c.T356G:p.V119G,SHBG:ENSCAFT00000060401.1:exon3:c.T356G:p.V119G,SHBG:ENSCAFT00000067007.1:exon3:c.T179G:p.V60G,SHBG:ENSCAFT00000074625.1:exon3:c.T179G:p.V60G,SHBG:ENSCAFT00000079573.1:exon3:c.T356G:p.V119G	SRP159481	Mammary Tumor
SRR7781092-SRR7781091	chr8	10215437	10215437	C	G	COCH	Missense_Mutation	ENSCAFT00000082713.1	exon1	c.C116G	p.S39C	SNP	exonic	COCH		nonsynonymous SNV	COCH:ENSCAFT00000082713.1:exon1:c.C116G:p.S39C	SRP159481	Mammary Tumor
SRR7781094-SRR7781093	chr18	53959597	53959597	A	G	GNG3	Missense_Mutation	ENSCAFT00000023247.3	exon2	c.T68C	p.L23P	SNP	exonic	GNG3		nonsynonymous SNV	GNG3:ENSCAFT00000023247.3:exon2:c.T68C:p.L23P	SRP159481	Mammary Tumor
SRR7781094-SRR7781093	chr2	42969792	42969792	T	A	SLC38A9	Missense_Mutation	ENSCAFT00000011022.4	exon6	c.A697T	p.N233Y	SNP	exonic	SLC38A9		nonsynonymous SNV	SLC38A9:ENSCAFT00000011022.4:exon6:c.A697T:p.N233Y,SLC38A9:ENSCAFT00000036227.4:exon6:c.A688T:p.N230Y,SLC38A9:ENSCAFT00000075935.1:exon6:c.A688T:p.N230Y,SLC38A9:ENSCAFT00000069057.1:exon7:c.A673T:p.N225Y	SRP159481	Mammary Tumor
SRR7781094-SRR7781093	chr21	29553661	29553661	T	A	FAM160A2	Missense_Mutation	ENSCAFT00000010323.4	exon9	c.A1853T	p.N618I	SNP	exonic	FAM160A2		nonsynonymous SNV	FAM160A2:ENSCAFT00000010323.4:exon9:c.A1853T:p.N618I	SRP159481	Mammary Tumor
SRR7781094-SRR7781093	chr26	37886191	37886191	T	C	PTEN	Missense_Mutation	ENSCAFT00000024821.4	exon4	c.T359C	p.L120P	SNP	exonic	PTEN		nonsynonymous SNV	PTEN:ENSCAFT00000024821.4:exon4:c.T359C:p.L120P,PTEN:ENSCAFT00000087317.1:exon8:c.T455C:p.L152P	SRP159481	Mammary Tumor
SRR7781094-SRR7781093	chr34	12675674	12675674	A	T	PIK3CA	Missense_Mutation	ENSCAFT00000080543.1	exon20	c.A3140T	p.H1047L	SNP	exonic	PIK3CA		nonsynonymous SNV	PIK3CA:ENSCAFT00000080543.1:exon20:c.A3140T:p.H1047L	SRP159481	Mammary Tumor
SRR7781098-SRR7781097	chr12	66945235	66945235	C	T	CDC40	Missense_Mutation	ENSCAFT00000006230.4	exon14	c.C1600T	p.P534S	SNP	exonic	CDC40		nonsynonymous SNV	CDC40:ENSCAFT00000006230.4:exon14:c.C1600T:p.P534S	SRP159481	Mammary Tumor
SRR7781098-SRR7781097	chr35	3127046	3127046	C	T	WRNIP1	Missense_Mutation	ENSCAFT00000014690.4	exon7	c.C1184T	p.P395L	SNP	exonic	WRNIP1		nonsynonymous SNV	WRNIP1:ENSCAFT00000014690.4:exon7:c.C1184T:p.P395L	SRP159481	Mammary Tumor
SRR7781098-SRR7781097	chr38	11572567	11572567	G	C	USH2A	Missense_Mutation	ENSCAFT00000017072.4	exon16	c.C3688G	p.P1230A	SNP	exonic	USH2A		nonsynonymous SNV	USH2A:ENSCAFT00000017072.4:exon16:c.C3688G:p.P1230A	SRP159481	Mammary Tumor
SRR7781098-SRR7781097	chr6	6784554	6784554	G	A	FZD9	Missense_Mutation	ENSCAFT00000020894.3	exon1	c.C5T	p.A2V	SNP	exonic	FZD9		nonsynonymous SNV	FZD9:ENSCAFT00000020894.3:exon1:c.C5T:p.A2V	SRP159481	Mammary Tumor
SRR7781098-SRR7781097	chr6	38789072	38789072	C	G	TRAF7	Missense_Mutation	ENSCAFT00000066928.1	exon18	c.G2022C	p.Q674H	SNP	exonic	TRAF7		nonsynonymous SNV	TRAF7:ENSCAFT00000066928.1:exon18:c.G2022C:p.Q674H,TRAF7:ENSCAFT00000061675.1:exon19:c.G2067C:p.Q689H,TRAF7:ENSCAFT00000080665.1:exon19:c.G2229C:p.Q743H,TRAF7:ENSCAFT00000030876.4:exon20:c.G1929C:p.Q643H,TRAF7:ENSCAFT00000073634.1:exon21:c.G2181C:p.Q727H	SRP159481	Mammary Tumor
SRR7781098-SRR7781097	chr6	42516376	42516376	C	T	SORT1	Missense_Mutation	ENSCAFT00000069491.1	exon19	c.C2519T	p.T840I	SNP	exonic	SORT1		nonsynonymous SNV	SORT1:ENSCAFT00000069491.1:exon19:c.C2519T:p.T840I,SORT1:ENSCAFT00000089420.1:exon19:c.C2612T:p.T871I,SORT1:ENSCAFT00000031550.4:exon20:c.C2678T:p.T893I,SORT1:ENSCAFT00000085795.1:exon20:c.C2678T:p.T893I	SRP159481	Mammary Tumor
SRR7781098-SRR7781097	chr8	68047495	68047495	C	T	CYP46A1	Missense_Mutation	ENSCAFT00000028297.4	exon3	c.C475T	p.R159C	SNP	exonic	CYP46A1		nonsynonymous SNV	CYP46A1:ENSCAFT00000028297.4:exon3:c.C475T:p.R159C	SRP159481	Mammary Tumor
SRR7781098-SRR7781097	chr9	51213610	51213610	C	T	MRPS2	Missense_Mutation	ENSCAFT00000042898.2	exon2	c.C1232T	p.P411L	SNP	exonic	MRPS2		nonsynonymous SNV	MRPS2:ENSCAFT00000042898.2:exon2:c.C1232T:p.P411L,MRPS2:ENSCAFT00000062957.1:exon3:c.C659T:p.P220L,MRPS2:ENSCAFT00000031602.4:exon4:c.C566T:p.P189L,MRPS2:ENSCAFT00000068814.1:exon4:c.C566T:p.P189L	SRP159481	Mammary Tumor
SRR7781100-SRR7781099	chr1	4894371	4894371	T	C	CNDP1	Missense_Mutation	ENSCAFT00000083067.1	exon2	c.A52G	p.S18G	SNP	exonic	CNDP1		nonsynonymous SNV	CNDP1:ENSCAFT00000083067.1:exon2:c.A52G:p.S18G,CNDP1:ENSCAFT00000000039.4:exon3:c.A178G:p.S60G,CNDP1:ENSCAFT00000085128.1:exon3:c.A112G:p.S38G,CNDP1:ENSCAFT00000086676.1:exon3:c.A112G:p.S38G,CNDP1:ENSCAFT00000083384.1:exon4:c.A199G:p.S67G	SRP159481	Mammary Tumor
SRR7781100-SRR7781099	chr10	23535119	23535119	G	A	MEI1	Missense_Mutation	ENSCAFT00000001583.4	exon31	c.C3538T	p.R1180W	SNP	exonic	MEI1		nonsynonymous SNV	MEI1:ENSCAFT00000001583.4:exon31:c.C3538T:p.R1180W	SRP159481	Mammary Tumor
SRR7781100-SRR7781099	chr16	58786838	58786838	G	T	AGPAT5	Missense_Mutation	ENSCAFT00000068061.1	exon3	c.G306T	p.M102I	SNP	exonic	AGPAT5		nonsynonymous SNV	AGPAT5:ENSCAFT00000068061.1:exon3:c.G306T:p.M102I,AGPAT5:ENSCAFT00000069242.1:exon5:c.G558T:p.M186I,AGPAT5:ENSCAFT00000013591.4:exon6:c.G540T:p.M180I	SRP159481	Mammary Tumor
SRR7781100-SRR7781099	chr27	22261798	22261798	G	C	KRAS	Missense_Mutation	ENSCAFT00000010525.4	exon2	c.G317C	p.G106A	SNP	exonic	KRAS		nonsynonymous SNV	KRAS:ENSCAFT00000010525.4:exon2:c.G317C:p.G106A,KRAS:ENSCAFT00000093055.1:exon2:c.G317C:p.G106A	SRP159481	Mammary Tumor
SRR7781100-SRR7781099	chr8	72326481	72326481	C	T	AKT1	Missense_Mutation	ENSCAFT00000029177.4	exon2	c.G49A	p.E17K	SNP	exonic	AKT1		nonsynonymous SNV	AKT1:ENSCAFT00000029177.4:exon2:c.G49A:p.E17K,AKT1:ENSCAFT00000066075.1:exon2:c.G49A:p.E17K	SRP159481	Mammary Tumor
SRR7781102-SRR7781101	chr1	110532202	110532202	T	C	TOMM40	Missense_Mutation	ENSCAFT00000007449.4	exon8	c.A824G	p.Y275C	SNP	exonic	TOMM40		nonsynonymous SNV	TOMM40:ENSCAFT00000007449.4:exon8:c.A824G:p.Y275C	SRP159481	Mammary Tumor
SRR7781102-SRR7781101	chr10	26707371	26707371	G	A	POLR2F	Missense_Mutation	ENSCAFT00000083306.1	exon1	c.C137T	p.A46V	SNP	exonic	POLR2F		nonsynonymous SNV	POLR2F:ENSCAFT00000083306.1:exon1:c.C137T:p.A46V	SRP159481	Mammary Tumor
SRR7781102-SRR7781101	chr12	18503588	18503588	C	T	TFAP2D	Missense_Mutation	ENSCAFT00000003384.3	exon8	c.C1325T	p.A442V	SNP	exonic	TFAP2D		nonsynonymous SNV	TFAP2D:ENSCAFT00000003384.3:exon8:c.C1325T:p.A442V	SRP159481	Mammary Tumor
SRR7781102-SRR7781101	chr15	19333047	19333047	C	T	BBS10	Missense_Mutation	ENSCAFT00000044818.2	exon2	c.G1169A	p.G390D	SNP	exonic	BBS10		nonsynonymous SNV	BBS10:ENSCAFT00000044818.2:exon2:c.G1169A:p.G390D	SRP159481	Mammary Tumor
SRR7781102-SRR7781101	chr19	37782236	37782236	A	T	CCNT2	Missense_Mutation	ENSCAFT00000084422.1	exon8	c.A1245T	p.L415F	SNP	exonic	CCNT2		nonsynonymous SNV	CCNT2:ENSCAFT00000084422.1:exon8:c.A1245T:p.L415F,CCNT2:ENSCAFT00000008092.5:exon10:c.A1344T:p.L448F,CCNT2:ENSCAFT00000008096.5:exon10:c.A1335T:p.L445F,CCNT2:ENSCAFT00000087787.1:exon10:c.A1344T:p.L448F	SRP159481	Mammary Tumor
SRR7781102-SRR7781101	chr2	64255134	64255134	G	T	SALL1	Missense_Mutation	ENSCAFT00000015496.5	exon2	c.G1280T	p.R427I	SNP	exonic	SALL1		nonsynonymous SNV	SALL1:ENSCAFT00000015496.5:exon2:c.G1280T:p.R427I	SRP159481	Mammary Tumor
SRR7781102-SRR7781101	chr24	31647706	31647706	G	A	TOX2	Missense_Mutation	ENSCAFT00000045528.3	exon3	c.G740A	p.R247H	SNP	exonic	TOX2		nonsynonymous SNV	TOX2:ENSCAFT00000045528.3:exon3:c.G740A:p.R247H,TOX2:ENSCAFT00000014891.4:exon4:c.G617A:p.R206H,TOX2:ENSCAFT00000014893.5:exon4:c.G506A:p.R169H,TOX2:ENSCAFT00000042987.2:exon4:c.G806A:p.R269H,TOX2:ENSCAFT00000080383.1:exon4:c.G806A:p.R269H	SRP159481	Mammary Tumor
SRR7781102-SRR7781101	chr27	22261798	22261798	G	A	KRAS	Missense_Mutation	ENSCAFT00000010525.4	exon2	c.G317A	p.G106D	SNP	exonic	KRAS		nonsynonymous SNV	KRAS:ENSCAFT00000010525.4:exon2:c.G317A:p.G106D,KRAS:ENSCAFT00000093055.1:exon2:c.G317A:p.G106D	SRP159481	Mammary Tumor
SRR7781102-SRR7781101	chr4	20340771	20340771	G	C	SUPV3L1	Missense_Mutation	ENSCAFT00000021963.4	exon15	c.G2427C	p.Q809H	SNP	exonic	SUPV3L1		nonsynonymous SNV	SUPV3L1:ENSCAFT00000021963.4:exon15:c.G2427C:p.Q809H	SRP159481	Mammary Tumor
SRR7781102-SRR7781101	chr7	29039446	29039446	G	A	F5	Missense_Mutation	ENSCAFT00000024154.4	exon10	c.G1601A	p.G534D	SNP	exonic	F5		nonsynonymous SNV	F5:ENSCAFT00000024154.4:exon10:c.G1601A:p.G534D,F5:ENSCAFT00000067855.1:exon10:c.G1601A:p.G534D,F5:ENSCAFT00000089698.1:exon10:c.G1601A:p.G534D	SRP159481	Mammary Tumor
SRR7781102-SRR7781101	chr7	34808464	34808464	C	T	AKT3	Missense_Mutation	ENSCAFT00000025041.4	exon2	c.G49A	p.E17K	SNP	exonic	AKT3		nonsynonymous SNV	AKT3:ENSCAFT00000025041.4:exon2:c.G49A:p.E17K,AKT3:ENSCAFT00000075710.1:exon2:c.G49A:p.E17K,AKT3:ENSCAFT00000082286.1:exon2:c.G49A:p.E17K,AKT3:ENSCAFT00000082759.1:exon2:c.G49A:p.E17K,AKT3:ENSCAFT00000085925.1:exon2:c.G49A:p.E17K,AKT3:ENSCAFT00000091142.1:exon2:c.G49A:p.E17K	SRP159481	Mammary Tumor
SRR7781102-SRR7781101	chr9	522211	522211	C	G	CCDC137	Missense_Mutation	ENSCAFT00000038251.2	exon2	c.G195C	p.M65I	SNP	exonic	CCDC137		nonsynonymous SNV	CCDC137:ENSCAFT00000038251.2:exon2:c.G195C:p.M65I	SRP159481	Mammary Tumor
SRR7781104-SRR7781103	chr1	101746201	101746201	G	A	ZNF444	Missense_Mutation	ENSCAFT00000003904.5	exon3	c.C404T	p.A135V	SNP	exonic	ZNF444		nonsynonymous SNV	ZNF444:ENSCAFT00000003904.5:exon3:c.C404T:p.A135V	SRP159481	Mammary Tumor
SRR7781104-SRR7781103	chr22	60987449	60987449	C	T	GAS6	Missense_Mutation	ENSCAFT00000071322.1	exon4	c.G377A	p.C126Y	SNP	exonic	GAS6		nonsynonymous SNV	GAS6:ENSCAFT00000071322.1:exon4:c.G377A:p.C126Y,GAS6:ENSCAFT00000075209.1:exon4:c.G356A:p.C119Y,GAS6:ENSCAFT00000010387.4:exon5:c.G395A:p.C132Y	SRP159481	Mammary Tumor
SRR7781104-SRR7781103	chr24	18096985	18096985	C	T	DDRGK1	Missense_Mutation	ENSCAFT00000010348.4	exon9	c.C1112T	p.A371V	SNP	exonic	DDRGK1		nonsynonymous SNV	DDRGK1:ENSCAFT00000010348.4:exon9:c.C1112T:p.A371V	SRP159481	Mammary Tumor
SRR7781104-SRR7781103	chr4	58484281	58484281	G	A	MYOZ3	Missense_Mutation	ENSCAFT00000046470.2	exon5	c.C359T	p.A120V	SNP	exonic	MYOZ3		nonsynonymous SNV	MYOZ3:ENSCAFT00000046470.2:exon5:c.C359T:p.A120V,MYOZ3:ENSCAFT00000028745.3:exon6:c.C440T:p.A147V,MYOZ3:ENSCAFT00000092540.1:exon6:c.C413T:p.A138V	SRP159481	Mammary Tumor
SRR7781104-SRR7781103	chr14	2991980	2991980	G	A	AKR1B1	Missense_Mutation	ENSCAFT00000002002.5	exon1	c.G43A	p.V15I	SNP	exonic	AKR1B1		nonsynonymous SNV	AKR1B1:ENSCAFT00000002002.5:exon1:c.G43A:p.V15I	SRP159481	Mammary Tumor
SRR7781106-SRR7781105	chr1	106926044	106926044	C	T	PRR12	Missense_Mutation	ENSCAFT00000005806.5	exon4	c.G2311A	p.A771T	SNP	exonic	PRR12		nonsynonymous SNV	PRR12:ENSCAFT00000005806.5:exon4:c.G2311A:p.A771T	SRP159481	Mammary Tumor
SRR7781106-SRR7781105	chr1	110347637	110347637	C	T	NKPD1	Missense_Mutation	ENSCAFT00000007333.5	exon4	c.C817T	p.R273W	SNP	exonic	NKPD1		nonsynonymous SNV	NKPD1:ENSCAFT00000007333.5:exon4:c.C817T:p.R273W	SRP159481	Mammary Tumor
SRR7781106-SRR7781105	chr12	66445763	66445763	A	G	AK9	Missense_Mutation	ENSCAFT00000006176.4	exon21	c.T2329C	p.F777L	SNP	exonic	AK9		nonsynonymous SNV	AK9:ENSCAFT00000006176.4:exon21:c.T2329C:p.F777L	SRP159481	Mammary Tumor
SRR7781106-SRR7781105	chr13	37696096	37696096	C	T	MROH1	Missense_Mutation	ENSCAFT00000077915.1	exon35	c.C3917T	p.A1306V	SNP	exonic	MROH1		nonsynonymous SNV	MROH1:ENSCAFT00000077915.1:exon35:c.C3917T:p.A1306V,MROH1:ENSCAFT00000002414.4:exon36:c.C3944T:p.A1315V	SRP159481	Mammary Tumor
SRR7781106-SRR7781105	chr17	22680651	22680651	T	A	PPP1CB	Missense_Mutation	ENSCAFT00000083509.1	exon1	c.T42A	p.D14E	SNP	exonic	PPP1CB		nonsynonymous SNV	PPP1CB:ENSCAFT00000083509.1:exon1:c.T42A:p.D14E,PPP1CB:ENSCAFT00000008467.4:exon2:c.T21A:p.D7E,PPP1CB:ENSCAFT00000074645.1:exon2:c.T12A:p.N4K,PPP1CB:ENSCAFT00000086763.1:exon2:c.T18A:p.N6K	SRP159481	Mammary Tumor
SRR7781106-SRR7781105	chr20	3796044	3796044	G	C	HDAC11	Missense_Mutation	ENSCAFT00000007075.4	exon2	c.G217C	p.V73L	SNP	exonic	HDAC11		nonsynonymous SNV	HDAC11:ENSCAFT00000007075.4:exon2:c.G217C:p.V73L,HDAC11:ENSCAFT00000069519.1:exon2:c.G136C:p.V46L,HDAC11:ENSCAFT00000078555.1:exon2:c.G136C:p.V46L,HDAC11:ENSCAFT00000087053.1:exon2:c.G217C:p.V73L,HDAC11:ENSCAFT00000087590.1:exon2:c.G217C:p.V73L,HDAC11:ENSCAFT00000093370.1:exon2:c.G136C:p.V46L,HDAC11:ENSCAFT00000071888.1:exon3:c.G136C:p.V46L,HDAC11:ENSCAFT00000075456.1:exon3:c.G136C:p.V46L,HDAC11:…	SRP159481	Mammary Tumor
SRR7781106-SRR7781105	chr26	17262130	17262130	C	A	TRPV4	Missense_Mutation	ENSCAFT00000017136.2	exon1	c.C31A	p.P11T	SNP	exonic	TRPV4		nonsynonymous SNV	TRPV4:ENSCAFT00000017136.2:exon1:c.C31A:p.P11T,TRPV4:ENSCAFT00000060667.1:exon1:c.C31A:p.P11T	SRP159481	Mammary Tumor
SRR7781106-SRR7781105	chr27	9251325	9251325	G	T	DBX2	Missense_Mutation	ENSCAFT00000014915.4	exon4	c.G652T	p.D218Y	SNP	exonic	DBX2		nonsynonymous SNV	DBX2:ENSCAFT00000014915.4:exon4:c.G652T:p.D218Y	SRP159481	Mammary Tumor
SRR7781106-SRR7781105	chr3	18247866	18247866	T	C	ADGRV1	Missense_Mutation	ENSCAFT00000013109.4	exon43	c.A9444G	p.I3148M	SNP	exonic	ADGRV1		nonsynonymous SNV	ADGRV1:ENSCAFT00000013109.4:exon43:c.A9444G:p.I3148M	SRP159481	Mammary Tumor
SRR7781106-SRR7781105	chr30	1180529	1180529	C	T	RYR3	Missense_Mutation	ENSCAFT00000012974.4	exon101	c.G14434A	p.E4812K	SNP	exonic	RYR3		nonsynonymous SNV	RYR3:ENSCAFT00000012974.4:exon101:c.G14434A:p.E4812K	SRP159481	Mammary Tumor
SRR7781108-SRR7781107	chr10	42267750	42267750	G	A	NMS	Missense_Mutation	ENSCAFT00000035636.3	exon5	c.C232T	p.H78Y	SNP	exonic	NMS		nonsynonymous SNV	NMS:ENSCAFT00000035636.3:exon5:c.C232T:p.H78Y	SRP159481	Mammary Tumor
SRR7781108-SRR7781107	chr11	51072029	51072029	G	A	MYORG	Missense_Mutation	ENSCAFT00000047362.1	exon1	c.C1823T	p.A608V	SNP	exonic	MYORG		nonsynonymous SNV	MYORG:ENSCAFT00000047362.1:exon1:c.C1823T:p.A608V	SRP159481	Mammary Tumor
SRR7781108-SRR7781107	chr12	18569782	18569782	A	G	TFAP2B	Missense_Mutation	ENSCAFT00000065200.1	exon7	c.A1232G	p.D411G	SNP	exonic	TFAP2B		nonsynonymous SNV	TFAP2B:ENSCAFT00000065200.1:exon7:c.A1232G:p.D411G,TFAP2B:ENSCAFT00000075879.1:exon7:c.A1286G:p.D429G,TFAP2B:ENSCAFT00000003387.4:exon8:c.A1313G:p.D438G,TFAP2B:ENSCAFT00000059520.1:exon8:c.A1313G:p.D438G	SRP159481	Mammary Tumor
SRR7781108-SRR7781107	chr12	23806728	23806728	G	T	DST	Missense_Mutation	ENSCAFT00000003820.5	exon57	c.C14960A	p.S4987Y	SNP	exonic	DST		nonsynonymous SNV	DST:ENSCAFT00000003820.5:exon57:c.C14960A:p.S4987Y,DST:ENSCAFT00000060416.1:exon58:c.C15101A:p.S5034Y,DST:ENSCAFT00000085899.1:exon58:c.C15101A:p.S5034Y,DST:ENSCAFT00000093931.1:exon58:c.C15017A:p.S5006Y,DST:ENSCAFT00000084556.1:exon59:c.C14354A:p.S4785Y,DST:ENSCAFT00000062154.1:exon60:c.C15515A:p.S5172Y,DST:ENSCAFT00000043203.3:exon61:c.C15551A:p.S5184Y,DST:ENSCAFT00000065491.1:exon61:c.C14720A:…	SRP159481	Mammary Tumor
SRR7781108-SRR7781107	chr12	63971799	63971799	A	G	RTN4IP1	Missense_Mutation	ENSCAFT00000005989.4	exon1	c.T58C	p.W20R	SNP	exonic	RTN4IP1		nonsynonymous SNV	RTN4IP1:ENSCAFT00000005989.4:exon1:c.T58C:p.W20R,RTN4IP1:ENSCAFT00000060566.1:exon1:c.T58C:p.W20R,RTN4IP1:ENSCAFT00000067105.1:exon1:c.T58C:p.W20R,RTN4IP1:ENSCAFT00000089000.1:exon2:c.T157C:p.W53R,RTN4IP1:ENSCAFT00000089137.1:exon2:c.T157C:p.W53R	SRP159481	Mammary Tumor
SRR7781108-SRR7781107	chr13	12472132	12472132	C	T	CSMD3	Missense_Mutation	ENSCAFT00000001238.5	exon52	c.G8243A	p.R2748K	SNP	exonic	CSMD3		nonsynonymous SNV	CSMD3:ENSCAFT00000001238.5:exon52:c.G8243A:p.R2748K	SRP159481	Mammary Tumor
SRR7781108-SRR7781107	chr18	40145750	40145750	G	A	OR5D17	Missense_Mutation	ENSCAFT00000012952.3	exon1	c.C131T	p.T44M	SNP	exonic	OR5D17		nonsynonymous SNV	OR5D17:ENSCAFT00000012952.3:exon1:c.C131T:p.T44M	SRP159481	Mammary Tumor
SRR7781108-SRR7781107	chr2	69374753	69374753	C	G	ADGRB2	Missense_Mutation	ENSCAFT00000017327.5	exon5	c.C1441G	p.P481A	SNP	exonic	ADGRB2		nonsynonymous SNV	ADGRB2:ENSCAFT00000017327.5:exon5:c.C1441G:p.P481A,ADGRB2:ENSCAFT00000065390.1:exon5:c.C1216G:p.P406A,ADGRB2:ENSCAFT00000074366.1:exon6:c.C1417G:p.P473A,ADGRB2:ENSCAFT00000080954.1:exon6:c.C1381G:p.P461A,ADGRB2:ENSCAFT00000046829.2:exon7:c.C1546G:p.P516A,ADGRB2:ENSCAFT00000080133.1:exon7:c.C1546G:p.P516A,ADGRB2:ENSCAFT00000082468.1:exon7:c.C1546G:p.P516A,ADGRB2:ENSCAFT00000087230.1:exon7:c.C1546G…	SRP159481	Mammary Tumor
SRR7781108-SRR7781107	chr24	14249548	14249548	G	A	HAO1	Missense_Mutation	ENSCAFT00000009507.4	exon6	c.G838A	p.E280K	SNP	exonic	HAO1		nonsynonymous SNV	HAO1:ENSCAFT00000009507.4:exon6:c.G838A:p.E280K	SRP159481	Mammary Tumor
SRR7781108-SRR7781107	chr26	37886012	37886012	C	A	PTEN	Missense_Mutation	ENSCAFT00000024821.4	exon4	c.C180A	p.D60E	SNP	exonic	PTEN		nonsynonymous SNV	PTEN:ENSCAFT00000024821.4:exon4:c.C180A:p.D60E,PTEN:ENSCAFT00000087317.1:exon8:c.C276A:p.D92E	SRP159481	Mammary Tumor
SRR7781108-SRR7781107	chr28	18660641	18660641	C	T	SORCS1	Missense_Mutation	ENSCAFT00000016900.5	exon18	c.G2158A	p.A720T	SNP	exonic	SORCS1		nonsynonymous SNV	SORCS1:ENSCAFT00000016900.5:exon18:c.G2158A:p.A720T,SORCS1:ENSCAFT00000038014.3:exon18:c.G2158A:p.A720T,SORCS1:ENSCAFT00000078800.1:exon18:c.G2158A:p.A720T	SRP159481	Mammary Tumor
SRR7781108-SRR7781107	chr28	35958592	35958592	G	A	DOCK1	Missense_Mutation	ENSCAFT00000020801.5	exon1	c.G112A	p.E38K	SNP	exonic	DOCK1		nonsynonymous SNV	DOCK1:ENSCAFT00000020801.5:exon1:c.G112A:p.E38K,DOCK1:ENSCAFT00000020816.4:exon2:c.G148A:p.E50K,DOCK1:ENSCAFT00000074746.1:exon4:c.G148A:p.E50K	SRP159481	Mammary Tumor
SRR7781108-SRR7781107	chr33	282519	282519	G	A	CSNKA2IP	Missense_Mutation	ENSCAFT00000039458.4	exon1	c.G1930A	p.A644T	SNP	exonic	CSNKA2IP		nonsynonymous SNV	CSNKA2IP:ENSCAFT00000039458.4:exon1:c.G1930A:p.A644T	SRP159481	Mammary Tumor
SRR7781108-SRR7781107	chr34	32201327	32201327	T	A	ZBBX	Missense_Mutation	ENSCAFT00000023060.4	exon13	c.A1331T	p.Q444L	SNP	exonic	ZBBX		nonsynonymous SNV	ZBBX:ENSCAFT00000023060.4:exon13:c.A1331T:p.Q444L,ZBBX:ENSCAFT00000046161.3:exon13:c.A1331T:p.Q444L,ZBBX:ENSCAFT00000064672.1:exon13:c.A1331T:p.Q444L	SRP159481	Mammary Tumor
SRR7781108-SRR7781107	chr36	22125808	22125808	C	G	PLEKHA3	Missense_Mutation	ENSCAFT00000086544.1	exon7	c.C955G	p.R319G	SNP	exonic	PLEKHA3		nonsynonymous SNV	PLEKHA3:ENSCAFT00000086544.1:exon7:c.C955G:p.R319G,PLEKHA3:ENSCAFT00000048774.2:exon8:c.C676G:p.R226G	SRP159481	Mammary Tumor
SRR7781108-SRR7781107	chr36	26005862	26005862	C	T	NCKAP1	Missense_Mutation	ENSCAFT00000075220.1	exon15	c.G1324A	p.E442K	SNP	exonic	NCKAP1		nonsynonymous SNV	NCKAP1:ENSCAFT00000075220.1:exon15:c.G1324A:p.E442K,NCKAP1:ENSCAFT00000022879.4:exon16:c.G1453A:p.E485K	SRP159481	Mammary Tumor
SRR7781108-SRR7781107	chr4	62303567	62303567	C	A	ITGA1	Missense_Mutation	ENSCAFT00000086847.1	exon24	c.G3043T	p.D1015Y	SNP	exonic	ITGA1		nonsynonymous SNV	ITGA1:ENSCAFT00000086847.1:exon24:c.G3043T:p.D1015Y,ITGA1:ENSCAFT00000029284.4:exon25:c.G3157T:p.D1053Y,ITGA1:ENSCAFT00000044970.3:exon25:c.G3244T:p.D1082Y,ITGA1:ENSCAFT00000092638.1:exon25:c.G3244T:p.D1082Y	SRP159481	Mammary Tumor
SRR7781108-SRR7781107	chr5	32563415	32563415	C	A	TP53	Missense_Mutation	ENSCAFT00000086831.1	exon5	c.G614T	p.S205I	SNP	exonic	TP53		nonsynonymous SNV	TP53:ENSCAFT00000086831.1:exon5:c.G614T:p.S205I,TP53:ENSCAFT00000026465.4:exon7:c.G683T:p.S228I,TP53:ENSCAFT00000081814.1:exon7:c.G875T:p.S292I	SRP159481	Mammary Tumor
SRR7781108-SRR7781107	chr6	42564827	42564827	C	A	CELSR2	Missense_Mutation	ENSCAFT00000031564.5	exon2	c.G3572T	p.G1191V	SNP	exonic	CELSR2		nonsynonymous SNV	CELSR2:ENSCAFT00000031564.5:exon2:c.G3572T:p.G1191V,CELSR2:ENSCAFT00000062054.1:exon2:c.G3572T:p.G1191V,CELSR2:ENSCAFT00000066277.1:exon2:c.G3572T:p.G1191V,CELSR2:ENSCAFT00000084773.1:exon2:c.G3572T:p.G1191V,CELSR2:ENSCAFT00000089617.1:exon2:c.G3572T:p.G1191V,CELSR2:ENSCAFT00000048109.3:exon3:c.G3362T:p.G1121V	SRP159481	Mammary Tumor
SRR7781108-SRR7781107	chr8	70950106	70950106	C	T	EXOC3L4	Missense_Mutation	ENSCAFT00000028890.5	exon4	c.C1283T	p.P428L	SNP	exonic	EXOC3L4		nonsynonymous SNV	EXOC3L4:ENSCAFT00000028890.5:exon4:c.C1283T:p.P428L	SRP159481	Mammary Tumor
SRR7781110-SRR7781109	chr1	6381870	6381870	C	T	CBLN2	Missense_Mutation	ENSCAFT00000000050.4	exon3	c.C173T	p.A58V	SNP	exonic	CBLN2		nonsynonymous SNV	CBLN2:ENSCAFT00000000050.4:exon3:c.C173T:p.A58V	SRP159481	Mammary Tumor
SRR7781110-SRR7781109	chr1	106233419	106233419	C	T	ASPDH	Missense_Mutation	ENSCAFT00000004750.4	exon5	c.C449T	p.T150I	SNP	exonic	ASPDH		nonsynonymous SNV	ASPDH:ENSCAFT00000004750.4:exon5:c.C449T:p.T150I,ASPDH:ENSCAFT00000070059.1:exon5:c.C449T:p.T150I	SRP159481	Mammary Tumor
SRR7781110-SRR7781109	chr13	60797786	60797786	T	C	GC	Missense_Mutation	ENSCAFT00000037533.3	exon12	c.A1400G	p.D467G	SNP	exonic	GC		nonsynonymous SNV	GC:ENSCAFT00000037533.3:exon12:c.A1400G:p.D467G	SRP159481	Mammary Tumor
SRR7781110-SRR7781109	chr29	6126041	6126041	G	A	RP1	Missense_Mutation	ENSCAFT00000011204.3	exon3	c.G386A	p.R129H	SNP	exonic	RP1		nonsynonymous SNV	RP1:ENSCAFT00000011204.3:exon3:c.G386A:p.R129H	SRP159481	Mammary Tumor
SRR7781110-SRR7781109	chr34	12675674	12675674	A	G	PIK3CA	Missense_Mutation	ENSCAFT00000080543.1	exon20	c.A3140G	p.H1047R	SNP	exonic	PIK3CA		nonsynonymous SNV	PIK3CA:ENSCAFT00000080543.1:exon20:c.A3140G:p.H1047R	SRP159481	Mammary Tumor
SRR7781110-SRR7781109	chr38	20321038	20321038	G	A	SH2D1B	Missense_Mutation	ENSCAFT00000020773.3	exon3	c.G395A	p.G132D	SNP	exonic	SH2D1B		nonsynonymous SNV	SH2D1B:ENSCAFT00000020773.3:exon3:c.G395A:p.G132D	SRP159481	Mammary Tumor
SRR7781110-SRR7781109	chr6	7719746	7719746	G	T	ALKBH4	Missense_Mutation	ENSCAFT00000021747.4	exon2	c.G281T	p.R94L	SNP	exonic	ALKBH4		nonsynonymous SNV	ALKBH4:ENSCAFT00000021747.4:exon2:c.G281T:p.R94L	SRP159481	Mammary Tumor
SRR7781110-SRR7781109	chr7	5641581	5641581	C	T	ASPM	Missense_Mutation	ENSCAFT00000018114.4	exon18	c.C7499T	p.S2500F	SNP	exonic	ASPM		nonsynonymous SNV	ASPM:ENSCAFT00000018114.4:exon18:c.C7499T:p.S2500F	SRP159481	Mammary Tumor
SRR7781110-SRR7781109	chr9	41536093	41536093	G	A	EVI2B	Missense_Mutation	ENSCAFT00000029563.1	exon1	c.G356A	p.R119Q	SNP	exonic	EVI2B		nonsynonymous SNV	EVI2B:ENSCAFT00000029563.1:exon1:c.G356A:p.R119Q	SRP159481	Mammary Tumor
SRR7781110-SRR7781109	chr9	41586563	41586563	A	T	NF1	Missense_Mutation	ENSCAFT00000082664.1	exon31	c.T3717A	p.N1239K	SNP	exonic	NF1		nonsynonymous SNV	NF1:ENSCAFT00000082664.1:exon31:c.T3717A:p.N1239K,NF1:ENSCAFT00000029545.4:exon32:c.T4125A:p.N1375K,NF1:ENSCAFT00000079603.1:exon32:c.T4158A:p.N1386K,NF1:ENSCAFT00000046191.3:exon33:c.T4188A:p.N1396K	SRP159481	Mammary Tumor
SRR9911342-SRR9911343	chr1	40491184	40491184	C	G	NUP43	Missense_Mutation	ENSCAFT00000000620.4	exon2	c.G148C	p.G50R	SNP	exonic	NUP43		nonsynonymous SNV	NUP43:ENSCAFT00000000620.4:exon2:c.G148C:p.G50R,NUP43:ENSCAFT00000059733.1:exon2:c.G148C:p.G50R	PRJNA552905	Mammary Tumor
SRR9911342-SRR9911343	chr10	1333949	1333949	G	A	LRP1	Missense_Mutation	ENSCAFT00000000295.5	exon74	c.G11413A	p.A3805T	SNP	exonic	LRP1		nonsynonymous SNV	LRP1:ENSCAFT00000000295.5:exon74:c.G11413A:p.A3805T,LRP1:ENSCAFT00000078799.1:exon74:c.G11413A:p.A3805T,LRP1:ENSCAFT00000049824.3:exon75:c.G11464A:p.A3822T	PRJNA552905	Mammary Tumor
SRR9911342-SRR9911343	chr18	51067561	51067561	C	T	PACS1	Missense_Mutation	ENSCAFT00000020613.4	exon16	c.G1768A	p.V590M	SNP	exonic	PACS1		nonsynonymous SNV	PACS1:ENSCAFT00000020613.4:exon16:c.G1768A:p.V590M	PRJNA552905	Mammary Tumor
SRR9911342-SRR9911343	chr21	28514177	28514177	A	C	OR51A10	Missense_Mutation	ENSCAFT00000022905.4	exon1	c.A868C	p.I290L	SNP	exonic	OR51A10		nonsynonymous SNV	OR51A10:ENSCAFT00000022905.4:exon1:c.A868C:p.I290L	PRJNA552905	Mammary Tumor
SRR9911342-SRR9911343	chr25	28457794	28457794	C	A	KIF13B	Missense_Mutation	ENSCAFT00000013047.4	exon36	c.C4474A	p.Q1492K	SNP	exonic	KIF13B		nonsynonymous SNV	KIF13B:ENSCAFT00000013047.4:exon36:c.C4474A:p.Q1492K,KIF13B:ENSCAFT00000081908.1:exon36:c.C4699A:p.Q1567K,KIF13B:ENSCAFT00000013053.5:exon37:c.C4192A:p.Q1398K,KIF13B:ENSCAFT00000069815.1:exon37:c.C4552A:p.Q1518K	PRJNA552905	Mammary Tumor
SRR9911342-SRR9911343	chr25	48785820	48785820	C	A	TRAF3IP1	Missense_Mutation	ENSCAFT00000019760.5	exon5	c.C536A	p.A179E	SNP	exonic	TRAF3IP1		nonsynonymous SNV	TRAF3IP1:ENSCAFT00000019760.5:exon5:c.C536A:p.A179E,TRAF3IP1:ENSCAFT00000061348.1:exon5:c.C446A:p.A149E,TRAF3IP1:ENSCAFT00000061791.1:exon5:c.C536A:p.A179E,TRAF3IP1:ENSCAFT00000064762.1:exon5:c.C536A:p.A179E,TRAF3IP1:ENSCAFT00000066185.1:exon5:c.C446A:p.A149E,TRAF3IP1:ENSCAFT00000086519.1:exon5:c.C446A:p.A149E	PRJNA552905	Mammary Tumor
SRR9911342-SRR9911343	chr27	38667866	38667866	C	A	PLEKHG6	Missense_Mutation	ENSCAFT00000024139.4	exon3	c.G269T	p.G90V	SNP	exonic	PLEKHG6		nonsynonymous SNV	PLEKHG6:ENSCAFT00000024139.4:exon3:c.G269T:p.G90V,PLEKHG6:ENSCAFT00000039538.4:exon3:c.G269T:p.G90V,PLEKHG6:ENSCAFT00000081575.1:exon3:c.G269T:p.G90V	PRJNA552905	Mammary Tumor
SRR9911342-SRR9911343	chr6	37160222	37160222	C	A	SRL	Missense_Mutation	ENSCAFT00000049429.3	exon6	c.C832A	p.P278T	SNP	exonic	SRL		nonsynonymous SNV	SRL:ENSCAFT00000049429.3:exon6:c.C832A:p.P278T,SRL:ENSCAFT00000030520.4:exon7:c.C1852A:p.P618T	PRJNA552905	Mammary Tumor
SRR9911342-SRR9911343	chr7	45309424	45309424	C	A	EPG5	Missense_Mutation	ENSCAFT00000028007.5	exon43	c.C7252A	p.Q2418K	SNP	exonic	EPG5		nonsynonymous SNV	EPG5:ENSCAFT00000028007.5:exon43:c.C7252A:p.Q2418K	PRJNA552905	Mammary Tumor
SRR9911344-SRR9911345	chr10	27307154	27307154	A	C	RAC2	Missense_Mutation	ENSCAFT00000002352.4	exon5	c.A319C	p.S107R	SNP	exonic	RAC2		nonsynonymous SNV	RAC2:ENSCAFT00000002352.4:exon5:c.A319C:p.S107R	PRJNA552905	Mammary Tumor
SRR9911344-SRR9911345	chr10	27307155	27307155	G	A	RAC2	Missense_Mutation	ENSCAFT00000002352.4	exon5	c.G320A	p.S107N	SNP	exonic	RAC2		nonsynonymous SNV	RAC2:ENSCAFT00000002352.4:exon5:c.G320A:p.S107N	PRJNA552905	Mammary Tumor
SRR9911344-SRR9911345	chr10	27307166	27307166	A	C	RAC2	Missense_Mutation	ENSCAFT00000002352.4	exon5	c.A331C	p.I111L	SNP	exonic	RAC2		nonsynonymous SNV	RAC2:ENSCAFT00000002352.4:exon5:c.A331C:p.I111L	PRJNA552905	Mammary Tumor
SRR9911344-SRR9911345	chr14	8724995	8724995	C	T	FSCN3	Missense_Mutation	ENSCAFT00000002697.4	exon6	c.G1364A	p.C455Y	SNP	exonic	FSCN3		nonsynonymous SNV	FSCN3:ENSCAFT00000002697.4:exon6:c.G1364A:p.C455Y	PRJNA552905	Mammary Tumor
SRR9911344-SRR9911345	chr19	12818437	12818437	C	A	LARP1B	Missense_Mutation	ENSCAFT00000065409.1	exon10	c.G1281T	p.R427S	SNP	exonic	LARP1B		nonsynonymous SNV	LARP1B:ENSCAFT00000065409.1:exon10:c.G1281T:p.R427S,LARP1B:ENSCAFT00000006170.5:exon11:c.G1647T:p.R549S,LARP1B:ENSCAFT00000006179.4:exon12:c.G1725T:p.R575S	PRJNA552905	Mammary Tumor
SRR9911344-SRR9911345	chr2	69089209	69089209	C	A	TMEM39B	Missense_Mutation	ENSCAFT00000017185.4	exon6	c.G739T	p.G247W	SNP	exonic	TMEM39B		nonsynonymous SNV	TMEM39B:ENSCAFT00000017185.4:exon6:c.G739T:p.G247W	PRJNA552905	Mammary Tumor
[truncated: 357 more rows]

## Sheet: Hemangiosarcoma
Tumor_Sample_Barcode	Chromosome	Start_Position	End_Position	Reference_Allele	Tumor_Seq_Allele2	Hugo_Symbol	Variant_Classification	tx	exon	txChange	aaChange	Variant_Type	Func.refGene	Gene.refGene	GeneDetail.refGene	ExonicFunc.refGene	AAChange.refGene	Project	TumorType
[truncated: 3,842 more rows]

## Sheet: Mast Cell Tumor
Tumor_Sample_Barcode	Chromosome	Start_Position	End_Position	Reference_Allele	Tumor_Seq_Allele2	Hugo_Symbol	Variant_Classification	tx	exon	txChange	aaChange	Variant_Type	Func.refGene	Gene.refGene	GeneDetail.refGene	ExonicFunc.refGene	AAChange.refGene	Project	TumorType
[truncated: 5,712 more rows]

[truncated: 7 more sheets: Pulmonary Adenocarcinoma, Urinary Carcinoma, Melanoma, Osteosarcoma, B-cell Lymphoma, T-cell Lymphoma, Glioma]
