# Supplementary material for: The Genetic Landscape of Canine Tumors: Insights from the Canine Cancer Genome Atlas (CCGA)
Source: Research Square preprint supplement (doi:10.21203/rs.3.rs-5025541/v1), 2024-09-19
Supplement: Supplementary file 2 [file 13fe8589926352bc2896c427.xlsx]

## Sheet: Melanoma
gene1

## Sheet: Hemangiosarcoma
gene1

## Sheet: Glioma
gene1

## Sheet: Osteosarcoma
gene1

## Sheet: BCL
gene1

## Sheet: TCL
gene1

## Sheet: Urinary
gene1

## Sheet: MammaryTumor
gene1

## Sheet: MastCell
gene1

## Sheet: Pulmonary
gene1
