# Supplementary material for: The Genetic Landscape of Canine Tumors: Insights from the Canine Cancer Genome Atlas (CCGA)
Source: Research Square preprint supplement (doi:10.21203/rs.3.rs-5025541/v1), 2024-09-19
Supplement: Supplementary file 8 [file 6a85ad980d2298fc9fdf458a.xlsx]

## Sheet: SigSim
	DBS1	DBS2	DBS3	DBS4	DBS5	DBS6	DBS7	DBS8	DBS9	DBS10	DBS11	DBS12	DBS13	DBS14	DBS15	DBS16	DBS17	DBS18	DBS19	DBS20
Melanoma	0.555	0	0.234	0.012	0.003	0.005	0.007	0.019	0.3	0.324	0.501	0.081	0.044	0.015	0.219	0.099	0.1	0.231	0.244	0.035
Hemangiosarcoma	0.311	0.047	0.421	0.01	0.071	0.216	0.034	0.049	0.119	0.182	0.344	0.067	0.156	0.277	0.204	0.127	0.067	0.317	0.337	0.092
Glioma	0.673	0.005	0.173	0.453	0.02	0.029	0.228	0.168	0.028	0.474	0.605	0.145	0.083	0.112	0.325	0.258	0.339	0.25	0.357	0.22
Osteosarcoma	0.001	0.003	0.021	0.026	0.013	0.022	0.122	0.257	0.365	0.023	0.043	0.227	0.084	0.029	0.305	0.152	0.188	0.227	0.048	0.053
B-cell Lymphoma	0.407	0.006	0.224	0.004	0.009	0.046	0.501	0.013	0.036	0.128	0.421	0.171	0.071	0.342	0.177	0.157	0.093	0.203	0.363	0.169
T-cell Lymphoma	0.003	0.315	0.084	0.006	0.003	0.263	0.114	0.061	0.158	0.089	0.134	0.114	0.159	0.036	0.31	0.11	0.492	0.151	0.136	0.108
Mammary Tumor	0.012	0.069	0.134	0.016	0.004	0.055	0.045	0.044	0.099	0.11	0.129	0.119	0.167	0.009	0.212	0.071	0.384	0.331	0.253	0.028
Mast Cell Tumor	0.887	0.025	0.068	0.031	0.009	0.045	0.003	0.025	0.061	0.079	0.849	0.071	0.102	0.013	0.384	0.099	0.011	0.264	0.398	0.043
Pulmonary Adenocarcinoma	0	0.004	0	0	0.894	0.012	0	0.052	0	0.01	0.012	0.035	0.272	0	0.015	0.289	0.046	0.145	0.049	0.033
