# Supplementary material for: The Genetic Landscape of Canine Tumors: Insights from the Canine Cancer Genome Atlas (CCGA)
Source: Research Square preprint supplement (doi:10.21203/rs.3.rs-5025541/v1), 2024-09-19
Supplement: Supplementary file 9 [file 75880fe614a362db2e4f13cf.xlsx]

## Sheet: Mammary Tumor
Tumor_Sample_Barcode

## Sheet: Hemangiosarcoma
Tumor_Sample_Barcode

## Sheet: Mast Cell Tumor
Tumor_Sample_Barcode

## Sheet: Pulmonary Adenocarcinoma
Tumor_Sample_Barcode

## Sheet: Urinary Carcinoma
Tumor_Sample_Barcode

## Sheet: Melanoma
Tumor_Sample_Barcode

## Sheet: Osteosarcoma
Tumor_Sample_Barcode

## Sheet: B-cell Lymphoma
Tumor_Sample_Barcode

## Sheet: T-cell Lymphoma
Tumor_Sample_Barcode

## Sheet: Glioma
Tumor_Sample_Barcode
