# Supplementary material for: The Genetic Landscape of Canine Tumors: Insights from the Canine Cancer Genome Atlas (CCGA)
Source: Research Square preprint supplement (doi:10.21203/rs.3.rs-5025541/v1), 2024-09-19
Supplement: Supplementary file 11 [file a39ad8e75e01b8f4db686bfb.xlsx]

## Sheet: SigSim
	SBS6	SBS1	SBS2	SBS3	SBS4	SBS5	SBS7a	SBS7b	SBS7c	SBS7d	SBS8	SBS9	SBS10a	SBS10b	SBS10c	SBS10d	SBS11	SBS12	SBS13	SBS14	SBS15	SBS16	SBS17a	SBS17b	SBS18	SBS19	SBS20	SBS21	SBS22a	SBS22b	SBS23	SBS24	SBS25	SBS26	SBS27	SBS28	SBS29	SBS30	SBS31	SBS32	SBS33	SBS34	SBS35	SBS36	SBS37	SBS38	SBS39	SBS40a	SBS40b
Melanoma	0.853	0.802	0.162	0.396	0.242	0.553	0.322	0.446	0.102	0.131	0.245	0.254	0.075	0.446	0.234	0.096	0.417	0.147	0.054	0.174	0.682	0.126	0.085	0.064	0.303	0.356	0.259	0.138	0.068	0.112	0.45	0.327	0.425	0.18	0.104	0.049	0.325	0.473	0.388	0.463	0.11	0.059	0.3	0.177	0.201	0.11	0.293	0.547	0.316
Hemangiosarcoma	0.728	0.694	0.122	0.509	0.552	0.559	0.184	0.246	0.123	0.123	0.508	0.306	0.163	0.316	0.371	0.24	0.224	0.206	0.1	0.394	0.646	0.173	0.141	0.049	0.576	0.22	0.39	0.159	0.088	0.151	0.265	0.615	0.48	0.223	0.131	0.065	0.679	0.303	0.314	0.361	0.132	0.081	0.414	0.422	0.25	0.298	0.366	0.587	0.392
Glioma	0.884	0.878	0.118	0.182	0.097	0.378	0.214	0.27	0.039	0.049	0.09	0.123	0.039	0.508	0.141	0.038	0.261	0.04	0.016	0.122	0.689	0.048	0.029	0.005	0.194	0.238	0.205	0.058	0.017	0.045	0.317	0.215	0.296	0.077	0.072	0.017	0.223	0.328	0.2	0.355	0.05	0.034	0.13	0.09	0.086	0.056	0.149	0.35	0.155
Osteosarcoma	0.772	0.617	0.102	0.543	0.469	0.59	0.181	0.249	0.132	0.117	0.462	0.403	0.161	0.256	0.385	0.217	0.311	0.214	0.095	0.367	0.708	0.171	0.176	0.262	0.523	0.25	0.406	0.178	0.106	0.153	0.385	0.588	0.5	0.251	0.135	0.127	0.588	0.36	0.308	0.378	0.147	0.077	0.41	0.371	0.265	0.236	0.381	0.605	0.435
B-cell Lymphoma	0.887	0.612	0.065	0.379	0.163	0.531	0.133	0.201	0.09	0.113	0.161	0.266	0.068	0.183	0.223	0.074	0.33	0.292	0.03	0.155	0.859	0.133	0.226	0.027	0.22	0.272	0.331	0.231	0.068	0.102	0.449	0.355	0.381	0.335	0.105	0.031	0.239	0.361	0.229	0.338	0.201	0.056	0.205	0.124	0.277	0.081	0.247	0.46	0.272
T-cell Lymphoma	0.61	0.641	0.085	0.413	0.507	0.44	0.173	0.217	0.097	0.084	0.353	0.243	0.118	0.237	0.285	0.158	0.17	0.156	0.113	0.261	0.531	0.14	0.072	0.042	0.441	0.17	0.336	0.117	0.082	0.132	0.19	0.416	0.406	0.182	0.097	0.061	0.471	0.253	0.227	0.265	0.152	0.068	0.294	0.316	0.184	0.389	0.318	0.442	0.313
Urinary Carcinoma	0.21	0.128	0.095	0.465	0.792	0.305	0.138	0.124	0.067	0.044	0.526	0.178	0.135	0.072	0.33	0.221	0.107	0.095	0.085	0.659	0.289	0.085	0.031	0.026	0.593	0.082	0.678	0.119	0.048	0.095	0.11	0.634	0.312	0.091	0.081	0.018	0.718	0.17	0.218	0.135	0.064	0.043	0.537	0.518	0.104	0.662	0.271	0.382	0.281
Mammary Tumor	0.852	0.724	0.153	0.46	0.394	0.558	0.277	0.35	0.111	0.136	0.365	0.277	0.162	0.301	0.339	0.217	0.363	0.167	0.123	0.309	0.82	0.158	0.076	0.045	0.455	0.288	0.366	0.155	0.097	0.151	0.408	0.498	0.457	0.199	0.147	0.062	0.487	0.402	0.325	0.375	0.122	0.082	0.368	0.344	0.208	0.207	0.337	0.589	0.369
Mast Cell Tumor	0.105	0.058	0.052	0.393	0.816	0.231	0.104	0.117	0.054	0.051	0.515	0.12	0.126	0.091	0.307	0.187	0.097	0.061	0.033	0.605	0.2	0.079	0.03	0.003	0.608	0.073	0.668	0.065	0.022	0.063	0.084	0.536	0.252	0.058	0.048	0.009	0.678	0.107	0.208	0.106	0.039	0.011	0.505	0.487	0.059	0.848	0.178	0.311	0.198
Pulmonary Adenocarcinoma	0.43	0.422	0.389	0.468	0.304	0.472	0.424	0.328	0.099	0.092	0.25	0.211	0.271	0.301	0.341	0.265	0.29	0.108	0.707	0.226	0.373	0.151	0.036	0.014	0.379	0.232	0.182	0.086	0.049	0.111	0.216	0.269	0.413	0.12	0.08	0.051	0.291	0.366	0.232	0.306	0.146	0.039	0.295	0.362	0.12	0.128	0.519	0.589	0.451
[truncated: 37 more columns]
