# Supplementary material for: The Genetic Landscape of Canine Tumors: Insights from the Canine Cancer Genome Atlas (CCGA)
Source: Research Square preprint supplement (doi:10.21203/rs.3.rs-5025541/v1), 2024-09-19
Supplement: Supplementary file 12 [file afd63fcf4612f9c0c3624a90.xlsx]

## Sheet: Mammary Tumor
gene	q.btBinom	q.fisher	q.lrt	q.ct	q.projection	dnds
KRAS	0	0	0	0	0	0
TP53	5.54076e-05	NA	NA	NA	0	0
PIK3CA	5.54076e-05	0	0	0	3.36768e-15	0
PTEN	0	0	0	1.76014e-17	2.53092e-10	6.21159e-08
PIK3R1	5.54076e-05	NA	NA	NA	8.14732e-10	0.000158713
AKT1	0	1.00094e-07	2.95059e-09	8.09293e-09	0.000118484	0.0399192

## Sheet: Hemangiosarcoma
gene	q.btBinom	q.fisher	q.lrt	q.ct	q.projection	dnds
TP53	1.72258e-05	NA	NA	NA	0	0
PIK3CA	0	0	0	0	2.63973e-09	0.000158248
RASA1	0.00215753	1.69155e-06	1.15098e-06	1.29268e-07	8.05786e-07	0.0303201
PTEN	0.000760586	7.3862e-07	4.40896e-07	6.93125e-08	5.51714e-06	0.000158248
NRAS	0	0.000114374	4.02635e-06	8.93369e-06	0.000142018	NA
TIGD7	0	1.33708e-09	9.65381e-10	4.66448e-11	0.00100524	NA
CDC27	NA	NA	0	0	NA	NA

## Sheet: Mast Cell Tumor
gene	q.btBinom	q.fisher	q.lrt	q.ct	q.projection	dnds
GNB1	0.000431911	0.00154304	7.79587e-05	0.000201288	0.0117248	NA
WIZ	0.00508002	0.0186121	0.0119634	0.00205604	0.0117248	NA
USP4	NA	NA	NA	0.0345667	0.0137824	NA
GNB2	0.00508002	NA	0.0118613	0.0149153	0.0184986	NA
FUCA1	NA	NA	NA	NA	0.0345389	NA

## Sheet: Melanoma
gene	q.btBinom	q.fisher	q.lrt	q.ct	q.projection	dnds
TP53	0.000139866	0	0	0	9.74332e-13	2.54359e-08
NRAS	0	6.39885e-07	3.17906e-08	6.65403e-08	1.94268e-05	0.00656396
PTPRJ	NA	6.39885e-07	7.62462e-07	6.65403e-08	0.000109885	NA
AFP	0.000139866	1.91815e-05	7.62462e-07	2.9018e-06	0.000646115	NA
NF1	NA	NA	NA	NA	NA	0.0337739

## Sheet: Osteosarcoma
gene	q.btBinom	q.fisher	q.lrt	q.ct	q.projection	dnds
TP53	0	0	0	0	0	0
SETD2	0	0	0	0	5.8367e-09	1.42632e-06

## Sheet: B-cell Lymphoma
gene	q.btBinom	q.fisher	q.lrt	q.ct	q.projection	dnds
POT1	2.08608e-05	0	0	0	0	0
SETD2	2.32004e-05	0	0	0	0	0
TP53	2.27904e-05	0	0	0	2.88658e-15	5.37875e-13
TRAF3	2.27904e-05	0	0	0	5.77316e-15	5.37875e-13
TBL1XR1	0	0	0	0	1.85272e-11	1.22098e-09
MYC	2.27904e-05	0	0	0	1.39713e-09	6.15637e-09
FBXW7	2.27904e-05	0	0	0	1.40682e-09	1.84599e-10
SATB1	0	1.29101e-09	1.87841e-09	1.13987e-10	2.38683e-08	0.0185643
CIC	0.000176531	3.25749e-12	4.18821e-12	7.69335e-14	7.89314e-08	NA
PTEN	0	2.59193e-09	2.43582e-09	1.13987e-10	1.10124e-07	0.000487462
MAP3K14	9.68371e-06	0	0	0	8.53912e-06	5.36151e-08
RARA	0	6.7745e-06	7.49286e-06	7.62151e-07	5.78401e-05	0.000457462
PCDHGC3	0.0165304	0.0414332	0.0485496	0.00534173	0.00516585	NA
SUZ12	NA	NA	NA	NA	0.00726685	NA
TXNDC12	0.00175267	0.0414332	0.035345	0.00397484	0.00726685	NA
PIK3CD	0.011735	0.0172405	0.00131312	0.00363977	0.0148209	NA
GBE1	NA	NA	0.0444957	NA	0.0272823	NA
TMEM132B	NA	NA	0.0269477	NA	0.0459293	NA
MTOR	NA	0.0163743	0.00131312	0.00370205	NA	NA
LINS1	NA	NA	0.0006217	0.00743359	NA	NA
ABCA13	NA	NA	NA	0.0208108	NA	NA
CYP4A39	NA	NA	NA	NA	NA	0.0198731

## Sheet: T-cell Lymphoma
gene	q.btBinom	q.fisher	q.lrt	q.ct	q.projection	dnds
TRAF3	0	0	0	0	1.9984e-15	0
FBXW7	0	0	0	0	2.03687e-12	8.31071e-08
TP53	0	0	0	1.28217e-19	3.64789e-08	7.97995e-06
SATB1	0	7.7953e-10	8.15129e-10	3.35177e-11	3.92685e-08	0.00376255
MAP3K14	6.81502e-05	3.35199e-08	1.07553e-09	3.50225e-09	0.000720678	NA
MUC13	0.000609999	0.000295861	1.38708e-05	4.92911e-05	0.0277303	NA
LINS1	0.00524181	4.24419e-08	4.80586e-08	6.08285e-09	NA	0.0141187
SETD2	NA	NA	NA	NA	NA	0.0039369

## Sheet: Glioma
gene	q.btBinom	q.fisher	q.lrt	q.ct	q.projection	dnds
PDGFRA	NA	3.83221e-10	5.21432e-10	2.50012e-11	0.00280708	4.77092e-06
QDPR	NA	NA	NA	0.0151472	0.0217645	NA
SDC2	NA	NA	NA	NA	0.0217645	NA
DHRS13	NA	NA	NA	NA	0.0406341	NA
KCNK3	NA	NA	NA	NA	0.0406341	NA
SLC35B1	NA	NA	NA	NA	0.0406341	NA
