# Supplementary material for: The Genetic Landscape of Canine Tumors: Insights from the Canine Cancer Genome Atlas (CCGA)
Source: Research Square preprint supplement (doi:10.21203/rs.3.rs-5025541/v1), 2024-09-19
Supplement: Supplementary file 13 [file babbcefb25bb527c10efd748.xlsx]

## Sheet: Mammary Tumor
X.1.ANNOID

## Sheet: Hemangiosarcoma
X.1.ANNOID

## Sheet: Mast Cell Tumor
X.1.ANNOID

## Sheet: Pulmonary Adenocarcinoma
X.1.ANNOID

## Sheet: Urinary Carcinoma
X.1.ANNOID

## Sheet: Melanoma
X.1.ANNOID

## Sheet: Osteosarcoma
X.1.ANNOID

## Sheet: B-cell Lymphoma
X.1.ANNOID

## Sheet: T-cell Lymphoma
X.1.ANNOID

## Sheet: Glioma
X.1.ANNOID
