# Supplementary material for: The Genetic Landscape of Canine Tumors: Insights from the Canine Cancer Genome Atlas (CCGA)
Source: Research Square preprint supplement (doi:10.21203/rs.3.rs-5025541/v1), 2024-09-19
Supplement: Supplementary file 14 [file c8ca946e6a44d336cfd10fb2.xlsx]

## Sheet: Pathway Details
Name	Class	Samples_Affected	Total_Variations	p.value	FDR	PathType	Histotype
TMED3	TMED3	61	66	1.1124e-67	4.73125e-66	computational_out.txt	Bcell
TMEM248	TMEM248	61	66	1.1124e-67	4.73125e-66	computational_out.txt	Bcell
PTTG2	PTTG2	21	21	2.3056e-16	1.63436e-15	computational_out.txt	Bcell
MODULE_280	MODULE_280	45	45	1.0344e-12	2.14499e-12	computational_out.txt	Bcell
SLBP	SLBP	21	21	9.4054e-12	1.16058e-10	computational_out.txt	Bcell
GAVISH_3CA_MALIGNANT_METAPROGRAM_4_CHROMATIN	GAVISH_3CA_MALIGNANT_METAPROGRAM_4_CHROMATIN	29	29	1.7497e-11	2.0347e-11	computational_out.txt	Bcell
SMG7	SMG7	21	21	4.1448e-11	9.63425e-10	computational_out.txt	Bcell
SUGP2	SUGP2	21	21	4.1448e-11	9.63425e-10	computational_out.txt	Bcell
MYCN	MYCN	21	21	7.2111e-11	2.84319e-10	computational_out.txt	Bcell
TIMP4	TIMP4	21	21	4.4749e-10	1.82558e-08	computational_out.txt	Bcell
TMEM161A	TMEM161A	21	21	4.4749e-10	1.82558e-08	computational_out.txt	Bcell
RCSD1	RCSD1	21	21	2.8395e-09	2.25244e-08	computational_out.txt	Bcell
SP140L	SP140L	21	21	2.9011e-09	5.91765e-08	computational_out.txt	Bcell
SSBP4	SSBP4	21	21	2.9011e-09	5.91765e-08	computational_out.txt	Bcell
GAVISH_3CA_METAPROGRAM_EPITHELIAL_MYC	GAVISH_3CA_METAPROGRAM_EPITHELIAL_MYC	19	19	4.5337e-09	5.49598e-09	computational_out.txt	Bcell
GAVISH_3CA_METAPROGRAM_CD8_T_CELLS_NAIVE_2	GAVISH_3CA_METAPROGRAM_CD8_T_CELLS_NAIVE_2	29	29	8.3264e-09	9.88976e-09	computational_out.txt	Bcell
MB	MB	23	25	1.0536e-08	1.82825e-08	computational_out.txt	Bcell
SBNO2	SBNO2	24	24	6.7688e-08	6.97466e-07	computational_out.txt	Bcell
GNF2_DDX5	GNF2_DDX5	24	24	1.004e-07	1.35975e-07	computational_out.txt	Bcell
SUSD4	SUSD4	21	21	1.1986e-07	2.88675e-06	computational_out.txt	Bcell
GNF2_BUB3	GNF2_BUB3	21	21	1.4862e-07	1.97403e-07	computational_out.txt	Bcell
JUN	JUN	19	19	6.2815e-07	1.01509e-06	computational_out.txt	Bcell
LMNB2	LMNB2	19	19	8.1862e-07	1.39033e-06	computational_out.txt	Bcell
MODULE_458	MODULE_458	21	21	1.5716e-06	3.79424e-06	computational_out.txt	Bcell
GAVISH_3CA_METAPROGRAM_CD4_T_CELLS_NAIVE_2	GAVISH_3CA_METAPROGRAM_CD4_T_CELLS_NAIVE_2	29	29	1.729e-06	2.0391e-06	computational_out.txt	Bcell
SNRPB2	SNRPB2	21	21	5.4184e-06	8.52865e-05	computational_out.txt	Bcell
MODULE_540	MODULE_540	19	19	5.6851e-06	1.45699e-05	computational_out.txt	Bcell
HCAR3	HCAR3	19	19	7.9538e-06	1.19907e-05	computational_out.txt	Bcell
EWSR1	EWSR1	19	19	9.7365e-06	1.07949e-05	computational_out.txt	Bcell
GAVISH_3CA_MALIGNANT_METAPROGRAM_20_MYC	GAVISH_3CA_MALIGNANT_METAPROGRAM_20_MYC	19	19	1.1167e-05	1.28145e-05	computational_out.txt	Bcell
IRF8	IRF8	21	21	1.2377e-05	1.97144e-05	computational_out.txt	Bcell
LRP8	LRP8	19	19	1.372e-05	2.34613e-05	computational_out.txt	Bcell
KRT86	KRT86	19	19	2.1022e-05	3.50191e-05	computational_out.txt	Bcell
MODULE_262	MODULE_262	19	19	5.343e-05	0.000109321	computational_out.txt	Bcell
GAVISH_3CA_METAPROGRAM_B_CELLS_HSP_STRESS	GAVISH_3CA_METAPROGRAM_B_CELLS_HSP_STRESS	19	19	7.3783e-05	8.62528e-05	computational_out.txt	Bcell
ITGB3BP	ITGB3BP	19	19	0.00011533	0.000185028	computational_out.txt	Bcell
MODULE_191	MODULE_191	19	19	0.00014786	0.000283931	computational_out.txt	Bcell
KIFC1	KIFC1	19	19	0.00014875	0.000243531	computational_out.txt	Bcell
MORF_CUL1	MORF_CUL1	11	11	0.00026077	0.000766587	computational_out.txt	Bcell
TCTN1	TCTN1	21	21	0.00038498	0.0103997	computational_out.txt	Bcell
JRK	JRK	19	19	0.00039105	0.000630919	computational_out.txt	Bcell
JAK3	JAK3	19	19	0.0004942	0.000796698	computational_out.txt	Bcell
KRT18	KRT18	19	19	0.00061911	0.0010245	computational_out.txt	Bcell
MODULE_332	MODULE_332	19	19	0.00092763	0.00201777	computational_out.txt	Bcell
MORF_RFC5	MORF_RFC5	19	19	0.00092851	0.00332038	computational_out.txt	Bcell
FGF4	FGF4	19	19	0.0015946	0.0017928	computational_out.txt	Bcell
GAVISH_3CA_MALIGNANT_METAPROGRAM_22_SECRETED_1	GAVISH_3CA_MALIGNANT_METAPROGRAM_22_SECRETED_1	19	19	0.0017389	0.00199774	computational_out.txt	Bcell
HNF1A	HNF1A	19	19	0.0020602	0.00315582	computational_out.txt	Bcell
GNF2_CD53	GNF2_CD53	8	8	0.0021108	0.00282808	computational_out.txt	Bcell
MTA1	MTA1	19	19	0.0032613	0.0126589	computational_out.txt	Bcell
KMT2D	KMT2D	9	9	0.0043548	0.00717071	computational_out.txt	Bcell
ITK	ITK	19	19	0.0054496	0.00876408	computational_out.txt	Bcell
GAVISH_3CA_MALIGNANT_METAPROGRAM_33_RBCS	GAVISH_3CA_MALIGNANT_METAPROGRAM_33_RBCS	19	19	0.0054504	0.00630153	computational_out.txt	Bcell
ESR1	ESR1	19	19	0.0054745	0.00605954	computational_out.txt	Bcell
GAVISH_3CA_METAPROGRAM_FIBROBLASTS_STRESS	GAVISH_3CA_METAPROGRAM_FIBROBLASTS_STRESS	19	19	0.0062261	0.00768745	computational_out.txt	Bcell
GNF2_VAV1	GNF2_VAV1	8	8	0.0066554	0.00970397	computational_out.txt	Bcell
HABP4	HABP4	19	19	0.0078029	0.0116927	computational_out.txt	Bcell
GSTP1	GSTP1	19	19	0.0078724	0.0117003	computational_out.txt	Bcell
GAVISH_3CA_METAPROGRAM_CD8_T_CELLS_NAIVE_3	GAVISH_3CA_METAPROGRAM_CD8_T_CELLS_NAIVE_3	10	10	0.0093446	0.0111057	computational_out.txt	Bcell
MODULE_61	MODULE_61	19	19	0.010607	0.027936	computational_out.txt	Bcell
MORF_MYC	MORF_MYC	19	19	0.014108	0.0458567	computational_out.txt	Bcell
GCM_SMO	GCM_SMO	11	11	0.015094	0.0196694	computational_out.txt	Bcell
LPAR2	LPAR2	19	19	0.020188	0.0344039	computational_out.txt	Bcell
DDX21	DDX21	6	6	0.024369	0.026148	computational_out.txt	Bcell
GNF2_HAT1	GNF2_HAT1	5	5	0.024748	0.0338844	computational_out.txt	Bcell
HALLMARK_WNT_BETA_CATENIN_SIGNALING	HALLMARK_WNT_BETA_CATENIN_SIGNALING	35	40	2.4037e-10	5.76888e-09	hallmark_out.txt	Bcell
HALLMARK_MYC_TARGETS_V2	HALLMARK_MYC_TARGETS_V2	19	19	0.00011925	0.000318	hallmark_out.txt	Bcell
HALLMARK_DNA_REPAIR	HALLMARK_DNA_REPAIR	21	21	0.00059675	0.000734462	hallmark_out.txt	Bcell
HALLMARK_E2F_TARGETS	HALLMARK_E2F_TARGETS	35	40	0.0034598	0.00437027	hallmark_out.txt	Bcell
GSE12366_GC_BCELL_VS_PLASMA_CELL_UP	GSE12366_GC_BCELL_VS_PLASMA_CELL_UP	58	78	2.7283e-37	2.8967e-37	immunologic_out.txt	Bcell
GSE29618_PRE_VS_DAY7_FLU_VACCINE_MONOCYTE_UP	GSE29618_PRE_VS_DAY7_FLU_VACCINE_MONOCYTE_UP	60	68	5.1663e-29	1.12176e-28	immunologic_out.txt	Bcell
GSE18791_UNSTIM_VS_NEWCATSLE_VIRUS_DC_10H_UP	GSE18791_UNSTIM_VS_NEWCATSLE_VIRUS_DC_10H_UP	51	56	9.7573e-29	1.32346e-28	immunologic_out.txt	Bcell
GSE27786_LIN_NEG_VS_NEUTROPHIL_DN	GSE27786_LIN_NEG_VS_NEUTROPHIL_DN	48	56	2.3386e-27	4.71278e-27	immunologic_out.txt	Bcell
GSE20198_UNTREATED_VS_IL12_TREATED_ACT_CD4_TCELL_DN	GSE20198_UNTREATED_VS_IL12_TREATED_ACT_CD4_TCELL_DN	56	78	1.2652e-24	1.79658e-24	immunologic_out.txt	Bcell
GSE14000_UNSTIM_VS_16H_LPS_DC_TRANSLATED_RNA_UP	GSE14000_UNSTIM_VS_16H_LPS_DC_TRANSLATED_RNA_UP	45	45	4.2767e-21	4.73917e-21	immunologic_out.txt	Bcell
GSE41867_DAY15_EFFECTOR_VS_DAY30_MEMORY_CD8_TCELL_LCMV_ARMSTRONG_UP	GSE41867_DAY15_EFFECTOR_VS_DAY30_MEMORY_CD8_TCELL_LCMV_ARMSTRONG_UP	47	61	5.5947e-19	2.30488e-18	immunologic_out.txt	Bcell
GSE12505_WT_VS_E2_2_HET_PDC_DN	GSE12505_WT_VS_E2_2_HET_PDC_DN	45	45	1.346e-17	1.43628e-17	immunologic_out.txt	Bcell
GSE22103_UNSTIM_VS_LPS_STIM_NEUTROPHIL_UP	GSE22103_UNSTIM_VS_LPS_STIM_NEUTROPHIL_UP	48	54	7.2004e-17	1.1083e-16	immunologic_out.txt	Bcell
GSE7509_DC_VS_MONOCYTE_WITH_FCGRIIB_STIM_UP	GSE7509_DC_VS_MONOCYTE_WITH_FCGRIIB_STIM_UP	56	57	1.6373e-15	1.46527e-14	immunologic_out.txt	Bcell
GSE40655_FOXO1_KO_VS_WT_NTREG_UP	GSE40655_FOXO1_KO_VS_WT_NTREG_UP	48	53	1.7241e-15	6.62865e-15	immunologic_out.txt	Bcell
GSE12366_PLASMA_CELL_VS_NAIVE_BCELL_DN	GSE12366_PLASMA_CELL_VS_NAIVE_BCELL_DN	53	61	4.2071e-15	4.47485e-15	immunologic_out.txt	Bcell
GSE27786_LIN_NEG_VS_NKTCELL_DN	GSE27786_LIN_NEG_VS_NKTCELL_DN	45	45	2.643e-14	5.33433e-14	immunologic_out.txt	Bcell
GSE31082_DN_VS_CD4_SP_THYMOCYTE_DN	GSE31082_DN_VS_CD4_SP_THYMOCYTE_DN	56	57	4.9755e-14	1.13182e-13	immunologic_out.txt	Bcell
KAECH_DAY15_EFF_VS_MEMORY_CD8_TCELL_DN	KAECH_DAY15_EFF_VS_MEMORY_CD8_TCELL_DN	46	56	9.0047e-14	1.8491e-12	immunologic_out.txt	Bcell
GSE25123_ROSIGLITAZONE_VS_IL4_AND_ROSIGLITAZONE_STIM_PPARG_KO_MACROPHAGE_DAY10_UP	GSE25123_ROSIGLITAZONE_VS_IL4_AND_ROSIGLITAZONE_STIM_PPARG_KO_MACROPHAGE_DAY10_UP	55	55	9.4358e-14	1.69231e-13	immunologic_out.txt	Bcell
GSE14026_TH1_VS_TH17_UP	GSE14026_TH1_VS_TH17_UP	45	45	7.8567e-13	8.71906e-13	immunologic_out.txt	Bcell
GSE41867_NAIVE_VS_EFFECTOR_CD8_TCELL_DN	GSE41867_NAIVE_VS_EFFECTOR_CD8_TCELL_DN	45	45	8.1428e-13	3.48751e-12	immunologic_out.txt	Bcell
GSE2405_0H_VS_9H_A_PHAGOCYTOPHILUM_STIM_NEUTROPHIL_UP	GSE2405_0H_VS_9H_A_PHAGOCYTOPHILUM_STIM_NEUTROPHIL_UP	45	45	9.0708e-13	1.53146e-12	immunologic_out.txt	Bcell
GSE5503_PLN_DC_VS_SPLEEN_DC_ACTIVATED_ALLOGENIC_TCELL_DN	GSE5503_PLN_DC_VS_SPLEEN_DC_ACTIVATED_ALLOGENIC_TCELL_DN	45	45	9.848e-13	6.04574e-12	immunologic_out.txt	Bcell
GSE29618_PRE_VS_DAY7_POST_TIV_FLU_VACCINE_MONOCYTE_UP	GSE29618_PRE_VS_DAY7_POST_TIV_FLU_VACCINE_MONOCYTE_UP	48	56	4.0748e-12	8.90606e-12	immunologic_out.txt	Bcell
GSE10239_NAIVE_VS_MEMORY_CD8_TCELL_UP	GSE10239_NAIVE_VS_MEMORY_CD8_TCELL_UP	55	55	4.1153e-12	4.22372e-12	immunologic_out.txt	Bcell
GSE17974_CTRL_VS_ACT_IL4_AND_ANTI_IL12_12H_CD4_TCELL_DN	GSE17974_CTRL_VS_ACT_IL4_AND_ANTI_IL12_12H_CD4_TCELL_DN	45	45	4.5775e-12	6.08572e-12	immunologic_out.txt	Bcell
GSE19198_6H_VS_24H_IL21_TREATED_TCELL_DN	GSE19198_6H_VS_24H_IL21_TREATED_TCELL_DN	38	43	7.682e-12	1.05193e-11	immunologic_out.txt	Bcell
GSE11961_MARGINAL_ZONE_BCELL_VS_PLASMA_CELL_DAY7_UP	GSE11961_MARGINAL_ZONE_BCELL_VS_PLASMA_CELL_DAY7_UP	37	43	9.0249e-12	9.50953e-12	immunologic_out.txt	Bcell
GSE22601_IMMATURE_CD4_SINGLE_POSITIVE_VS_CD4_SINGLE_POSITIVE_THYMOCYTE_DN	GSE22601_IMMATURE_CD4_SINGLE_POSITIVE_VS_CD4_SINGLE_POSITIVE_THYMOCYTE_DN	45	45	1.9069e-11	2.99874e-11	immunologic_out.txt	Bcell
GSE19198_CTRL_VS_IL21_TREATED_TCELL_6H_UP	GSE19198_CTRL_VS_IL21_TREATED_TCELL_6H_UP	53	64	2.6529e-11	3.63932e-11	immunologic_out.txt	Bcell
GSE40274_FOXP3_VS_FOXP3_AND_SATB1_TRANSDUCED_ACTIVATED_CD4_TCELL_DN	GSE40274_FOXP3_VS_FOXP3_AND_SATB1_TRANSDUCED_ACTIVATED_CD4_TCELL_DN	45	45	2.6613e-11	1.0021e-10	immunologic_out.txt	Bcell
GSE5589_IL6_KO_VS_IL10_KO_LPS_AND_IL10_STIM_MACROPHAGE_45MIN_UP	GSE5589_IL6_KO_VS_IL10_KO_LPS_AND_IL10_STIM_MACROPHAGE_45MIN_UP	55	55	7.396e-11	4.73237e-10	immunologic_out.txt	Bcell
GSE36009_WT_VS_NLRP10_KO_DC_DN	GSE36009_WT_VS_NLRP10_KO_DC_DN	54	69	7.4071e-11	1.87675e-10	immunologic_out.txt	Bcell
GSE360_L_MAJOR_VS_B_MALAYI_HIGH_DOSE_MAC_DN	GSE360_L_MAJOR_VS_B_MALAYI_HIGH_DOSE_MAC_DN	45	45	3.2137e-10	8.51735e-10	immunologic_out.txt	Bcell
GSE23308_CTRL_VS_CORTICOSTERONE_TREATED_MACROPHAGE_MINERALCORTICOID_REC_KO_UP	GSE23308_CTRL_VS_CORTICOSTERONE_TREATED_MACROPHAGE_MINERALCORTICOID_REC_KO_UP	41	52	3.2656e-10	5.39145e-10	immunologic_out.txt	Bcell
GSE2405_0H_VS_6H_A_PHAGOCYTOPHILUM_STIM_NEUTROPHIL_UP	GSE2405_0H_VS_6H_A_PHAGOCYTOPHILUM_STIM_NEUTROPHIL_UP	45	45	3.3128e-10	5.58956e-10	immunologic_out.txt	Bcell
GSE2770_IL4_ACT_VS_ACT_CD4_TCELL_48H_DN	GSE2770_IL4_ACT_VS_ACT_CD4_TCELL_48H_DN	45	45	8.7423e-10	1.69224e-09	immunologic_out.txt	Bcell
GSE35435_RESTING_VS_IL4_TREATED_MACROPHAGE_UP	GSE35435_RESTING_VS_IL4_TREATED_MACROPHAGE_UP	47	61	8.9381e-10	2.23158e-09	immunologic_out.txt	Bcell
GSE339_CD8POS_VS_CD4CD8DN_DC_DN	GSE339_CD8POS_VS_CD4CD8DN_DC_DN	55	55	9.4926e-10	2.30379e-09	immunologic_out.txt	Bcell
GSE2770_UNTREATED_VS_ACT_CD4_TCELL_2H_UP	GSE2770_UNTREATED_VS_ACT_CD4_TCELL_2H_UP	45	45	1.0671e-09	2.0877e-09	immunologic_out.txt	Bcell
GSE37301_LYMPHOID_PRIMED_MPP_VS_GRAN_MONO_PROGENITOR_UP	GSE37301_LYMPHOID_PRIMED_MPP_VS_GRAN_MONO_PROGENITOR_UP	63	74	1.4008e-09	4.051e-09	immunologic_out.txt	Bcell
GSE27786_BCELL_VS_NEUTROPHIL_UP	GSE27786_BCELL_VS_NEUTROPHIL_UP	31	35	1.521e-09	3.01807e-09	immunologic_out.txt	Bcell
GSE17186_NAIVE_VS_CD21LOW_TRANSITIONAL_BCELL_UP	GSE17186_NAIVE_VS_CD21LOW_TRANSITIONAL_BCELL_UP	55	55	2.0918e-09	2.53022e-09	immunologic_out.txt	Bcell
GSE7768_OVA_ALONE_VS_OVA_WITH_LPS_IMMUNIZED_MOUSE_WHOLE_SPLEEN_6H_UP	GSE7768_OVA_ALONE_VS_OVA_WITH_LPS_IMMUNIZED_MOUSE_WHOLE_SPLEEN_6H_UP	27	31	2.3595e-09	2.24831e-08	immunologic_out.txt	Bcell
GSE24210_RESTING_TREG_VS_TCONV_UP	GSE24210_RESTING_TREG_VS_TCONV_UP	45	45	2.4351e-09	4.17513e-09	immunologic_out.txt	Bcell
GSE3920_UNTREATED_VS_IFNA_TREATED_FIBROBLAST_UP	GSE3920_UNTREATED_VS_IFNA_TREATED_FIBROBLAST_UP	48	54	2.5684e-09	8.1677e-09	immunologic_out.txt	Bcell
GSE24671_CTRL_VS_SENDAI_VIRUS_INFECTED_MOUSE_SPLENOCYTES_DN	GSE24671_CTRL_VS_SENDAI_VIRUS_INFECTED_MOUSE_SPLENOCYTES_DN	48	53	2.8877e-09	5.04419e-09	immunologic_out.txt	Bcell
GSE25088_CTRL_VS_ROSIGLITAZONE_STIM_STAT6_KO_MACROPHAGE_DN	GSE25088_CTRL_VS_ROSIGLITAZONE_STIM_STAT6_KO_MACROPHAGE_DN	45	45	4.718e-09	8.35706e-09	immunologic_out.txt	Bcell
GSE21546_ELK1_KO_VS_SAP1A_KO_AND_ELK1_KO_ANTI_CD3_STIM_DP_THYMOCYTES_UP	GSE21546_ELK1_KO_VS_SAP1A_KO_AND_ELK1_KO_ANTI_CD3_STIM_DP_THYMOCYTES_UP	25	25	4.7892e-09	7.09938e-09	immunologic_out.txt	Bcell
GSE8621_UNSTIM_VS_LPS_STIM_MACROPHAGE_DN	GSE8621_UNSTIM_VS_LPS_STIM_MACROPHAGE_DN	45	45	5.0839e-09	5.3977e-08	immunologic_out.txt	Bcell
GSE411_UNSTIM_VS_100MIN_IL6_STIM_SOCS3_KO_MACROPHAGE_UP	GSE411_UNSTIM_VS_100MIN_IL6_STIM_SOCS3_KO_MACROPHAGE_UP	45	45	5.2108e-09	2.10418e-08	immunologic_out.txt	Bcell
GSE9006_HEALTHY_VS_TYPE_1_DIABETES_PBMC_1MONTH_POST_DX_DN	GSE9006_HEALTHY_VS_TYPE_1_DIABETES_PBMC_1MONTH_POST_DX_DN	45	45	6.6172e-09	7.73906e-08	immunologic_out.txt	Bcell
GSE33162_HDAC3_KO_VS_HDAC3_KO_4H_LPS_STIM_MACROPHAGE_UP	GSE33162_HDAC3_KO_VS_HDAC3_KO_4H_LPS_STIM_MACROPHAGE_UP	27	31	7.9775e-09	1.89698e-08	immunologic_out.txt	Bcell
GSE10273_HIGH_VS_LOW_IL7_TREATED_IRF4_8_NULL_PRE_BCELL_DN	GSE10273_HIGH_VS_LOW_IL7_TREATED_IRF4_8_NULL_PRE_BCELL_DN	45	45	8.0648e-09	8.3014e-09	immunologic_out.txt	Bcell
GSE36476_YOUNG_VS_OLD_DONOR_MEMORY_CD4_TCELL_40H_TSST_ACT_DN	GSE36476_YOUNG_VS_OLD_DONOR_MEMORY_CD4_TCELL_40H_TSST_ACT_DN	56	57	1.5088e-08	4.10561e-08	immunologic_out.txt	Bcell
GSE21670_STAT3_KO_VS_WT_CD4_TCELL_DN	GSE21670_STAT3_KO_VS_WT_CD4_TCELL_DN	46	56	1.5446e-08	2.30971e-08	immunologic_out.txt	Bcell
GSE26928_NAIVE_VS_CXCR5_POS_CD4_TCELL_DN	GSE26928_NAIVE_VS_CXCR5_POS_CD4_TCELL_DN	33	40	2.0953e-08	3.92397e-08	immunologic_out.txt	Bcell
GSE35825_UNTREATED_VS_IFNG_STIM_MACROPHAGE_DN	GSE35825_UNTREATED_VS_IFNG_STIM_MACROPHAGE_DN	36	39	2.1245e-08	5.36748e-08	immunologic_out.txt	Bcell
GSE37301_LYMPHOID_PRIMED_MPP_VS_RAG2_KO_NK_CELL_UP	GSE37301_LYMPHOID_PRIMED_MPP_VS_RAG2_KO_NK_CELL_UP	55	55	2.1338e-08	6.18428e-08	immunologic_out.txt	Bcell
GSE21670_UNTREATED_VS_IL6_TREATED_STAT3_KO_CD4_TCELL_DN	GSE21670_UNTREATED_VS_IL6_TREATED_STAT3_KO_CD4_TCELL_DN	42	48	2.2417e-08	3.36923e-08	immunologic_out.txt	Bcell
GSE2706_UNSTIM_VS_2H_R848_DC_UP	GSE2706_UNSTIM_VS_2H_R848_DC_UP	24	24	4.8306e-08	9.13366e-08	immunologic_out.txt	Bcell
GSE27786_CD8_TCELL_VS_MONO_MAC_UP	GSE27786_CD8_TCELL_VS_MONO_MAC_UP	24	24	7.1566e-08	1.43078e-07	immunologic_out.txt	Bcell
GSE9006_HEALTHY_VS_TYPE_1_DIABETES_PBMC_AT_DX_DN	GSE9006_HEALTHY_VS_TYPE_1_DIABETES_PBMC_AT_DX_DN	53	64	7.6407e-08	9.01569e-07	immunologic_out.txt	Bcell
GSE1925_CTRL_VS_IFNG_PRIMED_MACROPHAGE_24H_IFNG_STIM_DN	GSE1925_CTRL_VS_IFNG_PRIMED_MACROPHAGE_24H_IFNG_STIM_DN	48	53	7.9415e-08	1.09312e-07	immunologic_out.txt	Bcell
NAKAYA_PBMC_FLUMIST_AGE_18_50YO_7DY_IFN_SUBSET_UP	NAKAYA_PBMC_FLUMIST_AGE_18_50YO_7DY_IFN_SUBSET_UP	21	21	1.8118e-07	5.71364e-06	immunologic_out.txt	Bcell
GSE29164_CD8_TCELL_VS_CD8_TCELL_AND_IL12_TREATED_MELANOMA_DAY7_UP	GSE29164_CD8_TCELL_VS_CD8_TCELL_AND_IL12_TREATED_MELANOMA_DAY7_UP	45	45	1.8838e-07	3.96361e-07	immunologic_out.txt	Bcell
GSE339_EX_VIVO_VS_IN_CULTURE_CD8POS_DC_DN	GSE339_EX_VIVO_VS_IN_CULTURE_CD8POS_DC_DN	55	55	2.6217e-07	6.3861e-07	immunologic_out.txt	Bcell
GSE20715_0H_VS_48H_OZONE_TLR4_KO_LUNG_DN	GSE20715_0H_VS_48H_OZONE_TLR4_KO_LUNG_DN	53	64	2.6237e-07	3.76398e-07	immunologic_out.txt	Bcell
GSE360_T_GONDII_VS_B_MALAYI_HIGH_DOSE_MAC_DN	GSE360_T_GONDII_VS_B_MALAYI_HIGH_DOSE_MAC_DN	45	45	2.7434e-07	7.32957e-07	immunologic_out.txt	Bcell
GSE17301_CTRL_VS_48H_IFNA2_STIM_CD8_TCELL_UP	GSE17301_CTRL_VS_48H_IFNA2_STIM_CD8_TCELL_UP	49	53	3.1827e-07	3.86034e-07	immunologic_out.txt	Bcell
GSE29618_LAIV_VS_TIV_FLU_VACCINE_DAY7_MDC_DN	GSE29618_LAIV_VS_TIV_FLU_VACCINE_DAY7_MDC_DN	51	56	3.4065e-07	7.3275e-07	immunologic_out.txt	Bcell
GSE3982_MAC_VS_BASOPHIL_UP	GSE3982_MAC_VS_BASOPHIL_UP	45	45	4.6453e-07	1.60227e-06	immunologic_out.txt	Bcell
GSE27786_LSK_VS_NEUTROPHIL_DN	GSE27786_LSK_VS_NEUTROPHIL_DN	45	45	5.442e-07	1.10424e-06	immunologic_out.txt	Bcell
GSE24026_PD1_LIGATION_VS_CTRL_IN_ACT_TCELL_LINE_DN	GSE24026_PD1_LIGATION_VS_CTRL_IN_ACT_TCELL_LINE_DN	45	45	6.1357e-07	1.03164e-06	immunologic_out.txt	Bcell
GSE27786_BCELL_VS_CD8_TCELL_UP	GSE27786_BCELL_VS_CD8_TCELL_UP	45	45	7.6248e-07	1.50957e-06	immunologic_out.txt	Bcell
GSE3039_NKT_CELL_VS_B1_BCELL_DN	GSE3039_NKT_CELL_VS_B1_BCELL_DN	51	56	9.4113e-07	2.11186e-06	immunologic_out.txt	Bcell
GSE13306_TREG_VS_TCONV_SPLEEN_DN	GSE13306_TREG_VS_TCONV_SPLEEN_DN	35	35	9.5845e-07	1.03419e-06	immunologic_out.txt	Bcell
GSE20754_WT_VS_TCF1_KO_MEMORY_CD8_TCELL_DN	GSE20754_WT_VS_TCF1_KO_MEMORY_CD8_TCELL_DN	40	48	1.065e-06	1.53953e-06	immunologic_out.txt	Bcell
GSE17721_0.5H_VS_4H_PAM3CSK4_BMDC_UP	GSE17721_0.5H_VS_4H_PAM3CSK4_BMDC_UP	35	40	1.184e-06	1.45272e-06	immunologic_out.txt	Bcell
GSE17301_ACD3_ACD28_VS_ACD3_ACD28_AND_IFNA2_STIM_CD8_TCELL_DN	GSE17301_ACD3_ACD28_VS_ACD3_ACD28_AND_IFNA2_STIM_CD8_TCELL_DN	45	45	1.2786e-06	1.54693e-06	immunologic_out.txt	Bcell
GSE17974_IL4_AND_ANTI_IL12_VS_UNTREATED_48H_ACT_CD4_TCELL_DN	GSE17974_IL4_AND_ANTI_IL12_VS_UNTREATED_48H_ACT_CD4_TCELL_DN	45	45	1.4939e-06	1.99916e-06	immunologic_out.txt	Bcell
GSE1566_WT_VS_EZH2_KO_LN_TCELL_DN	GSE1566_WT_VS_EZH2_KO_LN_TCELL_DN	45	45	1.5606e-06	1.81996e-06	immunologic_out.txt	Bcell
GSE24210_CTRL_VS_IL35_TREATED_TCONV_CD4_TCELL_UP	GSE24210_CTRL_VS_IL35_TREATED_TCONV_CD4_TCELL_UP	50	53	1.8206e-06	3.11548e-06	immunologic_out.txt	Bcell
QIU_PBMC_HEPTATITIS_B_SURFACE_ANTIGEN_AGE_UNDER50_NON_RESPONDERS_VS_RESPONDERS_0DY_UP	QIU_PBMC_HEPTATITIS_B_SURFACE_ANTIGEN_AGE_UNDER50_NON_RESPONDERS_VS_RESPONDERS_0DY_UP	15	15	1.8252e-06	8.12597e-05	immunologic_out.txt	Bcell
GSE11057_CD4_CENT_MEM_VS_PBMC_UP	GSE11057_CD4_CENT_MEM_VS_PBMC_UP	33	36	2.197e-06	2.27516e-06	immunologic_out.txt	Bcell
GSE2770_IL12_AND_TGFB_ACT_VS_ACT_CD4_TCELL_2H_UP	GSE2770_IL12_AND_TGFB_ACT_VS_ACT_CD4_TCELL_2H_UP	49	53	2.2848e-06	4.38265e-06	immunologic_out.txt	Bcell
GSE3920_IFNA_VS_IFNB_TREATED_ENDOTHELIAL_CELL_DN	GSE3920_IFNA_VS_IFNB_TREATED_ENDOTHELIAL_CELL_DN	45	45	2.3626e-06	7.46396e-06	immunologic_out.txt	Bcell
GSE21927_SPLENIC_VS_TUMOR_MONOCYTES_FROM_C26GM_TUMOROUS_MICE_BALBC_DN	GSE21927_SPLENIC_VS_TUMOR_MONOCYTES_FROM_C26GM_TUMOROUS_MICE_BALBC_DN	27	32	2.3866e-06	3.63862e-06	immunologic_out.txt	Bcell
GSE10273_LOW_IL7_VS_HIGH_IL7_AND_IRF4_IN_IRF4_8_NULL_PRE_BCELL_DN	GSE10273_LOW_IL7_VS_HIGH_IL7_AND_IRF4_IN_IRF4_8_NULL_PRE_BCELL_DN	45	45	2.7972e-06	2.88038e-06	immunologic_out.txt	Bcell
GSE14000_4H_VS_16H_LPS_DC_TRANSLATED_RNA_DN	GSE14000_4H_VS_16H_LPS_DC_TRANSLATED_RNA_DN	25	25	2.9683e-06	3.28173e-06	immunologic_out.txt	Bcell
GSE14000_4H_VS_16H_LPS_DC_DN	GSE14000_4H_VS_16H_LPS_DC_DN	25	25	3.0201e-06	3.3383e-06	immunologic_out.txt	Bcell
GSE27786_LIN_NEG_VS_NEUTROPHIL_UP	GSE27786_LIN_NEG_VS_NEUTROPHIL_UP	26	30	3.3347e-06	6.72269e-06	immunologic_out.txt	Bcell
GSE2770_IL4_ACT_VS_ACT_CD4_TCELL_2H_DN	GSE2770_IL4_ACT_VS_ACT_CD4_TCELL_2H_DN	56	57	3.577e-06	6.91893e-06	immunologic_out.txt	Bcell
GSE41867_LCMV_ARMSTRONG_VS_CLONE13_DAY6_EFFECTOR_CD8_TCELL_DN	GSE41867_LCMV_ARMSTRONG_VS_CLONE13_DAY6_EFFECTOR_CD8_TCELL_DN	45	45	4.6155e-06	1.9361e-05	immunologic_out.txt	Bcell
GSE27786_CD8_TCELL_VS_NKTCELL_UP	GSE27786_CD8_TCELL_VS_NKTCELL_UP	29	33	4.6218e-06	9.26108e-06	immunologic_out.txt	Bcell
GSE411_UNSTIM_VS_100MIN_IL6_STIM_MACROPHAGE_DN	GSE411_UNSTIM_VS_100MIN_IL6_STIM_MACROPHAGE_DN	45	45	5.0854e-06	2.04886e-05	immunologic_out.txt	Bcell
GSE31082_DN_VS_CD8_SP_THYMOCYTE_DN	GSE31082_DN_VS_CD8_SP_THYMOCYTE_DN	48	53	5.6794e-06	1.29306e-05	immunologic_out.txt	Bcell
GSE17301_CTRL_VS_48H_ACD3_ACD28_STIM_CD8_TCELL_UP	GSE17301_CTRL_VS_48H_ACD3_ACD28_STIM_CD8_TCELL_UP	35	40	5.6963e-06	6.90595e-06	immunologic_out.txt	Bcell
KAECH_DAY8_EFF_VS_MEMORY_CD8_TCELL_DN	KAECH_DAY8_EFF_VS_MEMORY_CD8_TCELL_DN	46	56	6.6323e-06	0.000138338	immunologic_out.txt	Bcell
GSE9037_CTRL_VS_LPS_4H_STIM_IRAK4_KO_BMDM_DN	GSE9037_CTRL_VS_LPS_4H_STIM_IRAK4_KO_BMDM_DN	45	45	6.6416e-06	8.12637e-05	immunologic_out.txt	Bcell
GSE17974_0H_VS_1H_IN_VITRO_ACT_CD4_TCELL_DN	GSE17974_0H_VS_1H_IN_VITRO_ACT_CD4_TCELL_DN	45	45	6.8543e-06	9.05814e-06	immunologic_out.txt	Bcell
GSE21063_CTRL_VS_ANTI_IGM_STIM_BCELL_NFATC1_KO_3H_DN	GSE21063_CTRL_VS_ANTI_IGM_STIM_BCELL_NFATC1_KO_3H_DN	24	24	9.742e-06	1.42067e-05	immunologic_out.txt	Bcell
GSE17721_POLYIC_VS_CPG_2H_BMDC_UP	GSE17721_POLYIC_VS_CPG_2H_BMDC_UP	34	35	9.9998e-06	1.30169e-05	immunologic_out.txt	Bcell
GSE17974_CTRL_VS_ACT_IL4_AND_ANTI_IL12_2H_CD4_TCELL_DN	GSE17974_CTRL_VS_ACT_IL4_AND_ANTI_IL12_2H_CD4_TCELL_DN	45	45	1.0219e-05	1.36065e-05	immunologic_out.txt	Bcell
GSE34515_CD16_POS_MONOCYTE_VS_DC_DN	GSE34515_CD16_POS_MONOCYTE_VS_DC_DN	45	45	1.0254e-05	2.5565e-05	immunologic_out.txt	Bcell
GSE15750_WT_VS_TRAF6KO_DAY10_EFF_CD8_TCELL_UP	GSE15750_WT_VS_TRAF6KO_DAY10_EFF_CD8_TCELL_UP	38	43	1.036e-05	1.21217e-05	immunologic_out.txt	Bcell
GSE2770_IL12_VS_IL4_TREATED_ACT_CD4_TCELL_48H_DN	GSE2770_IL12_VS_IL4_TREATED_ACT_CD4_TCELL_48H_DN	45	45	1.0699e-05	2.06196e-05	immunologic_out.txt	Bcell
GSE22282_HYPOXIA_VS_NORMOXIA_MYELOID_DC_UP	GSE22282_HYPOXIA_VS_NORMOXIA_MYELOID_DC_UP	45	45	1.0861e-05	1.68054e-05	immunologic_out.txt	Bcell
GSE339_CD4POS_VS_CD8POS_DC_UP	GSE339_CD4POS_VS_CD8POS_DC_UP	55	55	1.5859e-05	3.84711e-05	immunologic_out.txt	Bcell
GSE24210_TCONV_VS_TREG_UP	GSE24210_TCONV_VS_TREG_UP	25	27	1.6392e-05	2.81233e-05	immunologic_out.txt	Bcell
OXNAD1	OXNAD1	24	24	1.6559e-05	0.000609233	immunologic_out.txt	Bcell
GSE3920_IFNA_VS_IFNG_TREATED_FIBROBLAST_UP	GSE3920_IFNA_VS_IFNG_TREATED_FIBROBLAST_UP	27	31	1.7697e-05	5.60758e-05	immunologic_out.txt	Bcell
GSE25085_FETAL_LIVER_VS_ADULT_BM_SP4_THYMIC_IMPLANT_UP	GSE25085_FETAL_LIVER_VS_ADULT_BM_SP4_THYMIC_IMPLANT_UP	25	25	1.8508e-05	3.25549e-05	immunologic_out.txt	Bcell
GSE19198_1H_VS_24H_IL21_TREATED_TCELL_DN	GSE19198_1H_VS_24H_IL21_TREATED_TCELL_DN	45	45	1.9074e-05	2.60919e-05	immunologic_out.txt	Bcell
GSE5589_WT_VS_IL6_KO_LPS_STIM_MACROPHAGE_45MIN_DN	GSE5589_WT_VS_IL6_KO_LPS_STIM_MACROPHAGE_45MIN_DN	55	55	2.2499e-05	0.000155006	immunologic_out.txt	Bcell
LINC00987	LINC00987	19	19	2.6154e-05	0.000589634	immunologic_out.txt	Bcell
GSE42021_TCONV_PLN_VS_TREG_PRECURSORS_THYMUS_UP	GSE42021_TCONV_PLN_VS_TREG_PRECURSORS_THYMUS_UP	48	53	2.8066e-05	0.000124326	immunologic_out.txt	Bcell
GSE1460_DP_THYMOCYTE_VS_NAIVE_CD4_TCELL_ADULT_BLOOD_DN	GSE1460_DP_THYMOCYTE_VS_NAIVE_CD4_TCELL_ADULT_BLOOD_DN	48	53	2.9474e-05	3.33732e-05	immunologic_out.txt	Bcell
QIU_PBMC_HEPTATITIS_B_SURFACE_ANTIGEN_AGE_UNDER50_NON_RESPONDERS_VS_RESPONDERS_3DY_UP	QIU_PBMC_HEPTATITIS_B_SURFACE_ANTIGEN_AGE_UNDER50_NON_RESPONDERS_VS_RESPONDERS_3DY_UP	15	15	3.1108e-05	0.0014457	immunologic_out.txt	Bcell
GSE17721_POLYIC_VS_PAM3CSK4_2H_BMDC_UP	GSE17721_POLYIC_VS_PAM3CSK4_2H_BMDC_UP	27	28	3.741e-05	4.91319e-05	immunologic_out.txt	Bcell
GSE27786_LIN_NEG_VS_BCELL_DN	GSE27786_LIN_NEG_VS_BCELL_DN	24	24	4.1911e-05	8.41396e-05	immunologic_out.txt	Bcell
GSE37416_0H_VS_24H_F_TULARENSIS_LVS_NEUTROPHIL_DN	GSE37416_0H_VS_24H_F_TULARENSIS_LVS_NEUTROPHIL_DN	45	45	4.4628e-05	0.000131282	immunologic_out.txt	Bcell
GSE20198_UNTREATED_VS_IFNA_TREATED_ACT_CD4_TCELL_UP	GSE20198_UNTREATED_VS_IFNA_TREATED_ACT_CD4_TCELL_UP	45	45	4.5432e-05	6.44614e-05	immunologic_out.txt	Bcell
GSE22103_UNSTIM_VS_GMCSF_AND_IFNG_STIM_NEUTROPHIL_UP	GSE22103_UNSTIM_VS_GMCSF_AND_IFNG_STIM_NEUTROPHIL_UP	25	25	5.3585e-05	8.24313e-05	immunologic_out.txt	Bcell
GSE8621_UNSTIM_VS_LPS_PRIMED_UNSTIM_MACROPHAGE_DN	GSE8621_UNSTIM_VS_LPS_PRIMED_UNSTIM_MACROPHAGE_DN	45	45	6.0679e-05	0.000641671	immunologic_out.txt	Bcell
GSE37416_CTRL_VS_24H_F_TULARENSIS_LVS_NEUTROPHIL_DN	GSE37416_CTRL_VS_24H_F_TULARENSIS_LVS_NEUTROPHIL_DN	45	45	7.0543e-05	0.000209376	immunologic_out.txt	Bcell
GSE37416_0H_VS_12H_F_TULARENSIS_LVS_NEUTROPHIL_DN	GSE37416_0H_VS_12H_F_TULARENSIS_LVS_NEUTROPHIL_DN	45	45	8.6822e-05	0.000255121	immunologic_out.txt	Bcell
GSE32986_CURDLAN_LOWDOSE_VS_CURDLAN_HIGHDOSE_STIM_DC_DN	GSE32986_CURDLAN_LOWDOSE_VS_CURDLAN_HIGHDOSE_STIM_DC_DN	45	45	0.0001078	0.000253946	immunologic_out.txt	Bcell
GSE2405_S_AUREUS_VS_A_PHAGOCYTOPHILUM_NEUTROPHIL_UP	GSE2405_S_AUREUS_VS_A_PHAGOCYTOPHILUM_NEUTROPHIL_UP	45	45	0.00010986	0.000186074	immunologic_out.txt	Bcell
GSE22886_TH1_VS_TH2_12H_ACT_UP	GSE22886_TH1_VS_TH2_12H_ACT_UP	50	53	0.00011114	0.000180953	immunologic_out.txt	Bcell
GSE11057_CD4_EFF_MEM_VS_PBMC_UP	GSE11057_CD4_EFF_MEM_VS_PBMC_UP	25	27	0.00011621	0.000120391	immunologic_out.txt	Bcell
GSE9650_EFFECTOR_VS_MEMORY_CD8_TCELL_DN	GSE9650_EFFECTOR_VS_MEMORY_CD8_TCELL_DN	44	50	0.00012836	0.00169589	immunologic_out.txt	Bcell
GSE26890_CXCR1_NEG_VS_POS_EFFECTOR_CD8_TCELL_DN	GSE26890_CXCR1_NEG_VS_POS_EFFECTOR_CD8_TCELL_DN	45	45	0.00013455	0.000250914	immunologic_out.txt	Bcell
GSE22886_NAIVE_BCELL_VS_BM_PLASMA_CELL_UP	GSE22886_NAIVE_BCELL_VS_BM_PLASMA_CELL_UP	30	33	0.00013568	0.00021717	immunologic_out.txt	Bcell
HCFC2	HCFC2	25	25	0.00018406	0.00309571	immunologic_out.txt	Bcell
GSE13411_NAIVE_VS_MEMORY_BCELL_DN	GSE13411_NAIVE_VS_MEMORY_BCELL_DN	45	45	0.00018831	0.000203647	immunologic_out.txt	Bcell
GSE22886_NAIVE_VS_IGM_MEMORY_BCELL_DN	GSE22886_NAIVE_VS_IGM_MEMORY_BCELL_DN	45	45	0.00020038	0.00032515	immunologic_out.txt	Bcell
GSE360_L_DONOVANI_VS_B_MALAYI_LOW_DOSE_DC_UP	GSE360_L_DONOVANI_VS_B_MALAYI_LOW_DOSE_DC_UP	50	51	0.00020923	0.000549851	immunologic_out.txt	Bcell
GSE17721_LPS_VS_POLYIC_6H_BMDC_DN	GSE17721_LPS_VS_POLYIC_6H_BMDC_DN	36	41	0.000228	0.000293119	immunologic_out.txt	Bcell
GSE20198_IL12_VS_IFNA_TREATED_ACT_CD4_TCELL_UP	GSE20198_IL12_VS_IFNA_TREATED_ACT_CD4_TCELL_UP	21	21	0.00026108	0.000370038	immunologic_out.txt	Bcell
GSE8515_IL1_VS_IL6_4H_STIM_MAC_UP	GSE8515_IL1_VS_IL6_4H_STIM_MAC_UP	45	45	0.00026314	0.00274432	immunologic_out.txt	Bcell
GSE19401_UNSTIM_VS_PAM2CSK4_STIM_FOLLICULAR_DC_UP	GSE19401_UNSTIM_VS_PAM2CSK4_STIM_FOLLICULAR_DC_UP	45	45	0.00027361	0.000378482	immunologic_out.txt	Bcell
GSE26343_WT_VS_NFAT5_KO_MACROPHAGE_DN	GSE26343_WT_VS_NFAT5_KO_MACROPHAGE_DN	45	45	0.00028141	0.000517497	immunologic_out.txt	Bcell
GSE19401_PLN_VS_PEYERS_PATCH_FOLLICULAR_DC_DN	GSE19401_PLN_VS_PEYERS_PATCH_FOLLICULAR_DC_DN	45	45	0.00028461	0.000393185	immunologic_out.txt	Bcell
GSE32986_CURDLAN_HIGHDOSE_VS_GMCSF_AND_CURDLAN_HIGHDOSE_STIM_DC_DN	GSE32986_CURDLAN_HIGHDOSE_VS_GMCSF_AND_CURDLAN_HIGHDOSE_STIM_DC_DN	45	45	0.00029014	0.000682879	immunologic_out.txt	Bcell
GSE6259_BCELL_VS_CD4_TCELL_UP	GSE6259_BCELL_VS_CD4_TCELL_UP	21	21	0.00030654	0.00222472	immunologic_out.txt	Bcell
GSE14000_4H_VS_16H_LPS_DC_TRANSLATED_RNA_UP	GSE14000_4H_VS_16H_LPS_DC_TRANSLATED_RNA_UP	48	54	0.00032917	0.000364004	immunologic_out.txt	Bcell
RING1	RING1	15	15	0.00039024	0.0232302	immunologic_out.txt	Bcell
GSE13306_TREG_VS_TCONV_DN	GSE13306_TREG_VS_TCONV_DN	25	25	0.00045138	0.000486752	immunologic_out.txt	Bcell
GSE29618_BCELL_VS_MDC_UP	GSE29618_BCELL_VS_MDC_UP	19	19	0.00049824	0.00106697	immunologic_out.txt	Bcell
GSE6674_ANTI_IGM_VS_CPG_STIM_BCELL_UP	GSE6674_ANTI_IGM_VS_CPG_STIM_BCELL_UP	25	25	0.00050617	0.00394366	immunologic_out.txt	Bcell
MED6	MED6	21	23	0.00052596	0.0136595	immunologic_out.txt	Bcell
GSE13485_DAY1_VS_DAY21_YF17D_VACCINE_PBMC_DN	GSE13485_DAY1_VS_DAY21_YF17D_VACCINE_PBMC_DN	25	25	0.00054151	0.00058898	immunologic_out.txt	Bcell
GSE19198_CTRL_VS_IL21_TREATED_TCELL_6H_DN	GSE19198_CTRL_VS_IL21_TREATED_TCELL_6H_DN	30	30	0.00057587	0.00078979	immunologic_out.txt	Bcell
GSE6674_CPG_VS_PL2_3_STIM_BCELL_DN	GSE6674_CPG_VS_PL2_3_STIM_BCELL_DN	28	32	0.0006195	0.00486239	immunologic_out.txt	Bcell
GSE37301_MULTIPOTENT_PROGENITOR_VS_RAG2_KO_NK_CELL_DN	GSE37301_MULTIPOTENT_PROGENITOR_VS_RAG2_KO_NK_CELL_DN	43	47	0.00067392	0.00196501	immunologic_out.txt	Bcell
GSE1460_DP_THYMOCYTE_VS_THYMIC_STROMAL_CELL_DN	GSE1460_DP_THYMOCYTE_VS_THYMIC_STROMAL_CELL_DN	45	45	0.00072153	0.000817683	immunologic_out.txt	Bcell
GSE3691_CONVENTIONAL_VS_PLASMACYTOID_DC_SPLEEN_UP	GSE3691_CONVENTIONAL_VS_PLASMACYTOID_DC_SPLEEN_UP	27	31	0.0007526	0.00209636	immunologic_out.txt	Bcell
GSE360_L_MAJOR_VS_B_MALAYI_LOW_DOSE_DC_UP	GSE360_L_MAJOR_VS_B_MALAYI_LOW_DOSE_DC_UP	53	62	0.0007645	0.00202922	immunologic_out.txt	Bcell
GSE3982_BCELL_VS_NKCELL_UP	GSE3982_BCELL_VS_NKCELL_UP	45	45	0.00087987	0.00289537	immunologic_out.txt	Bcell
GSE14415_FOXP3_KO_NATURAL_TREG_VS_TCONV_DN	GSE14415_FOXP3_KO_NATURAL_TREG_VS_TCONV_DN	29	29	0.00088177	0.00099164	immunologic_out.txt	Bcell
GSE46606_DAY1_VS_DAY3_CD40L_IL2_IL5_STIMULATED_IRF4_KO_BCELL_UP	GSE46606_DAY1_VS_DAY3_CD40L_IL2_IL5_STIMULATED_IRF4_KO_BCELL_UP	31	32	0.0009696	0.00536215	immunologic_out.txt	Bcell
GSE2770_UNTREATED_VS_IL4_TREATED_ACT_CD4_TCELL_6H_DN	GSE2770_UNTREATED_VS_IL4_TREATED_ACT_CD4_TCELL_6H_DN	36	39	0.0010207	0.00200805	immunologic_out.txt	Bcell
GSE36476_CTRL_VS_TSST_ACT_72H_MEMORY_CD4_TCELL_OLD_UP	GSE36476_CTRL_VS_TSST_ACT_72H_MEMORY_CD4_TCELL_OLD_UP	28	30	0.0010537	0.00285989	immunologic_out.txt	Bcell
GSE41176_WT_VS_TAK1_KO_ANTI_IGM_STIM_BCELL_1H_UP	GSE41176_WT_VS_TAK1_KO_ANTI_IGM_STIM_BCELL_1H_UP	25	25	0.0010952	0.00436925	immunologic_out.txt	Bcell
GSE21360_PRIMARY_VS_QUATERNARY_MEMORY_CD8_TCELL_DN	GSE21360_PRIMARY_VS_QUATERNARY_MEMORY_CD8_TCELL_DN	24	24	0.0011379	0.00167414	immunologic_out.txt	Bcell
GSE27786_BCELL_VS_MONO_MAC_UP	GSE27786_BCELL_VS_MONO_MAC_UP	24	24	0.0011792	0.0023381	immunologic_out.txt	Bcell
GSE29618_LAIV_VS_TIV_FLU_VACCINE_DAY7_PDC_UP	GSE29618_LAIV_VS_TIV_FLU_VACCINE_DAY7_PDC_UP	25	25	0.0012142	0.0026171	immunologic_out.txt	Bcell
GSE3982_CTRL_VS_LPS_4H_MAC_UP	GSE3982_CTRL_VS_LPS_4H_MAC_UP	25	25	0.0013651	0.0045429	immunologic_out.txt	Bcell
GSE17721_CTRL_VS_CPG_0.5H_BMDC_UP	GSE17721_CTRL_VS_CPG_0.5H_BMDC_UP	55	55	0.0014308	0.0017761	immunologic_out.txt	Bcell
GSE17721_CPG_VS_GARDIQUIMOD_0.5H_BMDC_DN	GSE17721_CPG_VS_GARDIQUIMOD_0.5H_BMDC_DN	45	45	0.0014456	0.00178651	immunologic_out.txt	Bcell
GSE17721_12H_VS_24H_LPS_BMDC_DN	GSE17721_12H_VS_24H_LPS_BMDC_DN	25	25	0.0017653	0.00217451	immunologic_out.txt	Bcell
GSE9988_ANTI_TREM1_VS_CTRL_TREATED_MONOCYTES_DN	GSE9988_ANTI_TREM1_VS_CTRL_TREATED_MONOCYTES_DN	19	20	0.0020087	0.0299777	immunologic_out.txt	Bcell
GSE17721_PAM3CSK4_VS_GADIQUIMOD_6H_BMDC_UP	GSE17721_PAM3CSK4_VS_GADIQUIMOD_6H_BMDC_UP	27	30	0.0020436	0.00265108	immunologic_out.txt	Bcell
GSE17721_PAM3CSK4_VS_CPG_4H_BMDC_UP	GSE17721_PAM3CSK4_VS_CPG_4H_BMDC_UP	25	25	0.0021211	0.0027382	immunologic_out.txt	Bcell
GSE46468_LUNG_INNATE_LYMPHOID_CELL_VS_SPLEEN_CD4_TCELL_DN	GSE46468_LUNG_INNATE_LYMPHOID_CELL_VS_SPLEEN_CD4_TCELL_DN	27	28	0.0021321	0.0116814	immunologic_out.txt	Bcell
GSE3720_LPS_VS_PMA_STIM_VD1_GAMMADELTA_TCELL_DN	GSE3720_LPS_VS_PMA_STIM_VD1_GAMMADELTA_TCELL_DN	29	29	0.0026864	0.00755844	immunologic_out.txt	Bcell
GSE17721_PAM3CSK4_VS_CPG_0.5H_BMDC_UP	GSE17721_PAM3CSK4_VS_CPG_0.5H_BMDC_UP	45	45	0.0027254	0.00350806	immunologic_out.txt	Bcell
GSE44649_NAIVE_VS_ACTIVATED_CD8_TCELL_DN	GSE44649_NAIVE_VS_ACTIVATED_CD8_TCELL_DN	23	25	0.0028122	0.0139374	immunologic_out.txt	Bcell
GSE21063_CTRL_VS_ANTI_IGM_STIM_BCELL_NFATC1_KO_8H_UP	GSE21063_CTRL_VS_ANTI_IGM_STIM_BCELL_NFATC1_KO_8H_UP	24	24	0.0028986	0.00423052	immunologic_out.txt	Bcell
GSE3565_DUSP1_VS_WT_SPLENOCYTES_DN	GSE3565_DUSP1_VS_WT_SPLENOCYTES_DN	29	29	0.003352	0.00841255	immunologic_out.txt	Bcell
BUCASAS_PBMC_FLUARIX_FLUVIRIN_CAUCASIAN_MALE_AGE_18_40YO_LOW_RESPONDERS_1DY_POSITIVE_PREDICTIVE_OF_TITER	BUCASAS_PBMC_FLUARIX_FLUVIRIN_CAUCASIAN_MALE_AGE_18_40YO_LOW_RESPONDERS_1DY_POSITIVE_PREDICTIVE_OF_TITER	8	8	0.0035261	0.00353344	immunologic_out.txt	Bcell
GSE15659_NAIVE_CD4_TCELL_VS_RESTING_TREG_DN	GSE15659_NAIVE_CD4_TCELL_VS_RESTING_TREG_DN	21	21	0.0037904	0.00440868	immunologic_out.txt	Bcell
GSE36476_CTRL_VS_TSST_ACT_16H_MEMORY_CD4_TCELL_OLD_UP	GSE36476_CTRL_VS_TSST_ACT_16H_MEMORY_CD4_TCELL_OLD_UP	24	24	0.0040262	0.0108831	immunologic_out.txt	Bcell
GSE32901_TH1_VS_TH17_NEG_CD4_TCELL_UP	GSE32901_TH1_VS_TH17_NEG_CD4_TCELL_UP	24	24	0.0042992	0.0101142	immunologic_out.txt	Bcell
GSE20500_CTRL_VS_RARA_ANTAGONIST_TREATED_CD4_TCELL_DN	GSE20500_CTRL_VS_RARA_ANTAGONIST_TREATED_CD4_TCELL_DN	21	21	0.0044915	0.00642266	immunologic_out.txt	Bcell
GSE17721_CPG_VS_GARDIQUIMOD_8H_BMDC_DN	GSE17721_CPG_VS_GARDIQUIMOD_8H_BMDC_DN	45	45	0.0047729	0.00592059	immunologic_out.txt	Bcell
GSE360_HIGH_DOSE_B_MALAYI_VS_M_TUBERCULOSIS_MAC_UP	GSE360_HIGH_DOSE_B_MALAYI_VS_M_TUBERCULOSIS_MAC_UP	45	45	0.004913	0.0128222	immunologic_out.txt	Bcell
GSE27786_CD8_TCELL_VS_NEUTROPHIL_UP	GSE27786_CD8_TCELL_VS_NEUTROPHIL_UP	24	24	0.0053436	0.0106912	immunologic_out.txt	Bcell
GSE15330_LYMPHOID_MULTIPOTENT_VS_MEGAKARYOCYTE_ERYTHROID_PROGENITOR_UP	GSE15330_LYMPHOID_MULTIPOTENT_VS_MEGAKARYOCYTE_ERYTHROID_PROGENITOR_UP	27	27	0.0054656	0.00631141	immunologic_out.txt	Bcell
GSE29164_UNTREATED_VS_CD8_TCELL_TREATED_MELANOMA_DAY3_DN	GSE29164_UNTREATED_VS_CD8_TCELL_TREATED_MELANOMA_DAY3_DN	25	25	0.0055932	0.01182	immunologic_out.txt	Bcell
GSE1925_CTRL_VS_IFNG_PRIMED_MACROPHAGE_24H_IFNG_STIM_UP	GSE1925_CTRL_VS_IFNG_PRIMED_MACROPHAGE_24H_IFNG_STIM_UP	45	45	0.0058336	0.00803181	immunologic_out.txt	Bcell
GSE21678_WT_VS_FOXO1_FOXO3_KO_TREG_DN	GSE21678_WT_VS_FOXO1_FOXO3_KO_TREG_DN	19	19	0.0059047	0.00889989	immunologic_out.txt	Bcell
GSE18791_CTRL_VS_NEWCASTLE_VIRUS_DC_16H_UP	GSE18791_CTRL_VS_NEWCASTLE_VIRUS_DC_16H_UP	19	19	0.0062283	0.00841774	immunologic_out.txt	Bcell
GSE3565_CTRL_VS_LPS_INJECTED_DUSP1_KO_SPLENOCYTES_DN	GSE3565_CTRL_VS_LPS_INJECTED_DUSP1_KO_SPLENOCYTES_DN	29	29	0.0063142	0.0158168	immunologic_out.txt	Bcell
GSE24026_PD1_LIGATION_VS_CTRL_IN_ACT_TCELL_LINE_UP	GSE24026_PD1_LIGATION_VS_CTRL_IN_ACT_TCELL_LINE_UP	24	27	0.0063586	0.0106946	immunologic_out.txt	Bcell
GSE6259_DEC205_POS_DC_VS_CD4_TCELL_DN	GSE6259_DEC205_POS_DC_VS_CD4_TCELL_DN	23	23	0.0067914	0.049766	immunologic_out.txt	Bcell
GSE1460_DP_VS_CD4_THYMOCYTE_DN	GSE1460_DP_VS_CD4_THYMOCYTE_DN	48	53	0.007276	0.00824914	immunologic_out.txt	Bcell
GSE27291_0H_VS_6H_STIM_GAMMADELTA_TCELL_UP	GSE27291_0H_VS_6H_STIM_GAMMADELTA_TCELL_UP	21	21	0.0072989	0.0138999	immunologic_out.txt	Bcell
GSE3982_EOSINOPHIL_VS_MAST_CELL_UP	GSE3982_EOSINOPHIL_VS_MAST_CELL_UP	16	18	0.0073245	0.0251004	immunologic_out.txt	Bcell
GSE17721_0.5H_VS_4H_LPS_BMDC_UP	GSE17721_0.5H_VS_4H_LPS_BMDC_UP	21	21	0.0075818	0.00929824	immunologic_out.txt	Bcell
GSE3982_DC_VS_TH2_UP	GSE3982_DC_VS_TH2_UP	45	45	0.0077286	0.0261136	immunologic_out.txt	Bcell
GSE29618_PRE_VS_DAY7_POST_LAIV_FLU_VACCINE_PDC_DN	GSE29618_PRE_VS_DAY7_POST_LAIV_FLU_VACCINE_PDC_DN	18	20	0.0080661	0.0175789	immunologic_out.txt	Bcell
GSE26343_UNSTIM_VS_LPS_STIM_NFAT5_KO_MACROPHAGE_DN	GSE26343_UNSTIM_VS_LPS_STIM_NFAT5_KO_MACROPHAGE_DN	45	45	0.0080902	0.0148671	immunologic_out.txt	Bcell
GSE37532_VISCERAL_ADIPOSE_TISSUE_VS_LN_DERIVED_PPARG_KO_TCONV_CD4_TCELL_DN	GSE37532_VISCERAL_ADIPOSE_TISSUE_VS_LN_DERIVED_PPARG_KO_TCONV_CD4_TCELL_DN	11	11	0.0081362	0.0243672	immunologic_out.txt	Bcell
GSE25088_IL4_VS_IL4_AND_ROSIGLITAZONE_STIM_STAT6_KO_MACROPHAGE_DAY10_DN	GSE25088_IL4_VS_IL4_AND_ROSIGLITAZONE_STIM_STAT6_KO_MACROPHAGE_DAY10_DN	45	45	0.0086322	0.0153108	immunologic_out.txt	Bcell
GSE13411_IGM_MEMORY_BCELL_VS_PLASMA_CELL_UP	GSE13411_IGM_MEMORY_BCELL_VS_PLASMA_CELL_UP	15	16	0.0090638	0.00978802	immunologic_out.txt	Bcell
GSE21927_SPLEEN_C57BL6_VS_EL4_TUMOR_BALBC_MONOCYTES_UP	GSE21927_SPLEEN_C57BL6_VS_EL4_TUMOR_BALBC_MONOCYTES_UP	34	34	0.0093746	0.014223	immunologic_out.txt	Bcell
GSE14308_TH1_VS_NAIVE_CD4_TCELL_DN	GSE14308_TH1_VS_NAIVE_CD4_TCELL_DN	22	22	0.010494	0.0116825	immunologic_out.txt	Bcell
GSE18791_UNSTIM_VS_NEWCATSLE_VIRUS_DC_18H_UP	GSE18791_UNSTIM_VS_NEWCATSLE_VIRUS_DC_18H_UP	19	19	0.01051	0.0142628	immunologic_out.txt	Bcell
GSE25088_CTRL_VS_ROSIGLITAZONE_STIM_STAT6_KO_MACROPHAGE_UP	GSE25088_CTRL_VS_ROSIGLITAZONE_STIM_STAT6_KO_MACROPHAGE_UP	21	21	0.010677	0.0189186	immunologic_out.txt	Bcell
GSE25088_CTRL_VS_IL4_AND_ROSIGLITAZONE_STIM_MACROPHAGE_UP	GSE25088_CTRL_VS_IL4_AND_ROSIGLITAZONE_STIM_MACROPHAGE_UP	29	33	0.011174	0.0197333	immunologic_out.txt	Bcell
GSE14415_INDUCED_TREG_VS_FAILED_INDUCED_TREG_UP	GSE14415_INDUCED_TREG_VS_FAILED_INDUCED_TREG_UP	19	19	0.011199	0.0126024	immunologic_out.txt	Bcell
GSE17974_1.5H_VS_72H_IL4_AND_ANTI_IL12_ACT_CD4_TCELL_DN	GSE17974_1.5H_VS_72H_IL4_AND_ANTI_IL12_ACT_CD4_TCELL_DN	15	15	0.011278	0.0149564	immunologic_out.txt	Bcell
GSE21033_CTRL_VS_POLYIC_STIM_DC_3H_DN	GSE21033_CTRL_VS_POLYIC_STIM_DC_3H_DN	24	24	0.011431	0.0165967	immunologic_out.txt	Bcell
GSE22919_RESTING_VS_IL2_IL12_IL15_STIM_NK_CELL_UP	GSE22919_RESTING_VS_IL2_IL12_IL15_STIM_NK_CELL_UP	24	26	0.011491	0.0187667	immunologic_out.txt	Bcell
GSE27786_BCELL_VS_NKCELL_UP	GSE27786_BCELL_VS_NKCELL_UP	24	24	0.011731	0.0232949	immunologic_out.txt	Bcell
GSE34392_ST2_KO_VS_WT_DAY8_LCMV_EFFECTOR_CD8_TCELL_DN	GSE34392_ST2_KO_VS_WT_DAY8_LCMV_EFFECTOR_CD8_TCELL_DN	45	45	0.011978	0.0297792	immunologic_out.txt	Bcell
GSE25085_FETAL_LIVER_VS_ADULT_BM_SP4_THYMIC_IMPLANT_DN	GSE25085_FETAL_LIVER_VS_ADULT_BM_SP4_THYMIC_IMPLANT_DN	15	15	0.013319	0.0234199	immunologic_out.txt	Bcell
GSE12845_IGD_NEG_BLOOD_VS_NAIVE_TONSIL_BCELL_DN	GSE12845_IGD_NEG_BLOOD_VS_NAIVE_TONSIL_BCELL_DN	21	21	0.013352	0.0142763	immunologic_out.txt	Bcell
GSE27241_WT_VS_RORGT_KO_TH17_POLARIZED_CD4_TCELL_TREATED_WITH_DIGOXIN_UP	GSE27241_WT_VS_RORGT_KO_TH17_POLARIZED_CD4_TCELL_TREATED_WITH_DIGOXIN_UP	27	32	0.01389	0.0264234	immunologic_out.txt	Bcell
GSE33162_UNTREATED_VS_4H_LPS_STIM_HDAC3_HET_MACROPHAGE_DN	GSE33162_UNTREATED_VS_4H_LPS_STIM_HDAC3_HET_MACROPHAGE_DN	32	38	0.015563	0.0370574	immunologic_out.txt	Bcell
GSE21927_UNTREATED_VS_GMCSF_GCSF_TREATED_BONE_MARROW_DN	GSE21927_UNTREATED_VS_GMCSF_GCSF_TREATED_BONE_MARROW_DN	16	16	0.015853	0.0241835	immunologic_out.txt	Bcell
GSE12003_4D_VS_8D_CULTURE_BM_PROGENITOR_DN	GSE12003_4D_VS_8D_CULTURE_BM_PROGENITOR_DN	16	16	0.016238	0.0171817	immunologic_out.txt	Bcell
GSE14415_INDUCED_TREG_VS_FOXP3_KO_INDUCED_TREG_UP	GSE14415_INDUCED_TREG_VS_FOXP3_KO_INDUCED_TREG_UP	29	29	0.017203	0.0193753	immunologic_out.txt	Bcell
GSE21033_1H_VS_12H_POLYIC_STIM_DC_DN	GSE21033_1H_VS_12H_POLYIC_STIM_DC_DN	24	24	0.018102	0.0261819	immunologic_out.txt	Bcell
GSE3565_CTRL_VS_LPS_INJECTED_SPLENOCYTES_DN	GSE3565_CTRL_VS_LPS_INJECTED_SPLENOCYTES_DN	29	29	0.019734	0.0494798	immunologic_out.txt	Bcell
GSE2706_R848_VS_LPS_8H_STIM_DC_UP	GSE2706_R848_VS_LPS_8H_STIM_DC_UP	19	19	0.022027	0.0415004	immunologic_out.txt	Bcell
GSE10211_UV_INACT_SENDAI_VS_LIVE_SENDAI_VIRUS_TRACHEAL_EPITHELIAL_CELLS_DN	GSE10211_UV_INACT_SENDAI_VS_LIVE_SENDAI_VIRUS_TRACHEAL_EPITHELIAL_CELLS_DN	21	21	0.02378	0.0243264	immunologic_out.txt	Bcell
GSE13493_CD4INTCD8POS_VS_CD8POS_THYMOCYTE_UP	GSE13493_CD4INTCD8POS_VS_CD8POS_THYMOCYTE_UP	16	18	0.025387	0.0276978	immunologic_out.txt	Bcell
GSE15659_CD45RA_NEG_CD4_TCELL_VS_RESTING_TREG_DN	GSE15659_CD45RA_NEG_CD4_TCELL_VS_RESTING_TREG_DN	21	21	0.026674	0.0309842	immunologic_out.txt	Bcell
GSE14769_40MIN_VS_360MIN_LPS_BMDM_UP	GSE14769_40MIN_VS_360MIN_LPS_BMDM_UP	19	19	0.027381	0.0312101	immunologic_out.txt	Bcell
GSE17974_IL4_AND_ANTI_IL12_VS_UNTREATED_2H_ACT_CD4_TCELL_UP	GSE17974_IL4_AND_ANTI_IL12_VS_UNTREATED_2H_ACT_CD4_TCELL_UP	28	30	0.027765	0.0371462	immunologic_out.txt	Bcell
GSE17186_MEMORY_VS_NAIVE_BCELL_UP	GSE17186_MEMORY_VS_NAIVE_BCELL_UP	19	19	0.028786	0.0347557	immunologic_out.txt	Bcell
GSE17721_0.5H_VS_4H_CPG_BMDC_UP	GSE17721_0.5H_VS_4H_CPG_BMDC_UP	15	15	0.036358	0.0445478	immunologic_out.txt	Bcell
GSE1460_CD4_THYMOCYTE_VS_NAIVE_CD4_TCELL_ADULT_BLOOD_UP	GSE1460_CD4_THYMOCYTE_VS_NAIVE_CD4_TCELL_ADULT_BLOOD_UP	45	45	0.039885	0.0450941	immunologic_out.txt	Bcell
GSE10239_MEMORY_VS_DAY4.5_EFF_CD8_TCELL_UP	GSE10239_MEMORY_VS_DAY4.5_EFF_CD8_TCELL_UP	27	31	0.043226	0.044262	immunologic_out.txt	Bcell
BRCA1_DN.V1_DN	BRCA1_DN.V1_DN	45	45	8.4823e-07	9.38467e-07	oncogenic_out.txt	Bcell
AKT_UP_MTOR_DN.V1_UP	AKT_UP_MTOR_DN.V1_UP	45	45	2.4613e-06	2.47319e-06	oncogenic_out.txt	Bcell
E2F1_UP.V1_UP	E2F1_UP.V1_UP	45	45	1.1649e-05	1.49567e-05	oncogenic_out.txt	Bcell
PDGF_ERK_DN.V1_DN	PDGF_ERK_DN.V1_DN	29	30	0.00010812	0.000292064	oncogenic_out.txt	Bcell
MEK_UP.V1_DN	MEK_UP.V1_DN	36	44	0.0002054	0.000427232	oncogenic_out.txt	Bcell
EGFR_UP.V1_DN	EGFR_UP.V1_DN	35	40	0.0025558	0.00334344	oncogenic_out.txt	Bcell
KRTAP5-9	KRTAP5-9	15	15	2.2542e-12	3.75825e-12	computational_out.txt	Glioma
MAT1A	MAT1A	15	15	1.4625e-11	2.53339e-11	computational_out.txt	Glioma
MARCKS	MARCKS	15	15	8.1359e-09	1.40689e-08	computational_out.txt	Glioma
MARF1	MARF1	15	15	3.2769e-08	5.67145e-08	computational_out.txt	Glioma
NAAA	NAAA	15	15	3.0247e-07	1.21413e-06	computational_out.txt	Glioma
IGFBP7	IGFBP7	15	15	3.6248e-07	5.67866e-07	computational_out.txt	Glioma
NEURL1	NEURL1	15	15	6.533e-07	2.79048e-06	computational_out.txt	Glioma
MEF2C	MEF2C	15	15	9.2655e-07	1.62045e-06	computational_out.txt	Glioma
GAVISH_3CA_MALIGNANT_METAPROGRAM_27_OLIGO_PROGENITOR	GAVISH_3CA_MALIGNANT_METAPROGRAM_27_OLIGO_PROGENITOR	15	15	2.8242e-06	3.25393e-06	computational_out.txt	Glioma
NAB2	NAB2	15	15	3.0031e-06	1.20789e-05	computational_out.txt	Glioma
NAPSA	NAPSA	15	15	3.8352e-06	1.56461e-05	computational_out.txt	Glioma
LRP1	LRP1	15	15	4.7357e-06	8.09117e-06	computational_out.txt	Glioma
NFKBIB	NFKBIB	15	15	5.2167e-06	2.24262e-05	computational_out.txt	Glioma
GAVISH_3CA_METAPROGRAM_FIBROBLASTS_CAF_7	GAVISH_3CA_METAPROGRAM_FIBROBLASTS_CAF_7	15	15	5.3735e-06	6.57785e-06	computational_out.txt	Glioma
P2RX5	P2RX5	15	15	1.2481e-05	5.89823e-05	computational_out.txt	Glioma
GAVISH_3CA_METAPROGRAM_FIBROBLASTS_CAF_10	GAVISH_3CA_METAPROGRAM_FIBROBLASTS_CAF_10	15	15	1.6634e-05	2.02876e-05	computational_out.txt	Glioma
PCCA	PCCA	17	18	5.0895e-05	0.000249361	computational_out.txt	Glioma
NECTIN1	NECTIN1	15	15	9.631e-05	0.000408755	computational_out.txt	Glioma
PCK1	PCK1	17	18	0.00019163	0.000948189	computational_out.txt	Glioma
NPY2R	NPY2R	15	15	0.00019968	0.000887023	computational_out.txt	Glioma
NPAS1	NPAS1	15	15	0.00019983	0.000885721	computational_out.txt	Glioma
LYN	LYN	15	15	0.00048672	0.000836589	computational_out.txt	Glioma
NCF4	NCF4	15	15	0.00073353	0.0030296	computational_out.txt	Glioma
NECAB3	NECAB3	15	15	0.00082179	0.00347306	computational_out.txt	Glioma
P2RY14	P2RY14	15	15	0.00092214	0.00437852	computational_out.txt	Glioma
PCLAF	PCLAF	15	15	0.0011753	0.00582984	computational_out.txt	Glioma
MODULE_51	MODULE_51	15	15	0.0011776	0.00318111	computational_out.txt	Glioma
MODULE_80	MODULE_80	15	15	0.0011776	0.00318111	computational_out.txt	Glioma
NEO1	NEO1	15	15	0.0012015	0.00512111	computational_out.txt	Glioma
ME1	ME1	15	15	0.001209	0.00211073	computational_out.txt	Glioma
MYC	MYC	15	15	0.0012603	0.00494959	computational_out.txt	Glioma
MODULE_200	MODULE_200	15	15	0.0013244	0.00256787	computational_out.txt	Glioma
MXD4	MXD4	15	15	0.0014368	0.00560969	computational_out.txt	Glioma
PAX6	PAX6	15	15	0.0019156	0.00927188	computational_out.txt	Glioma
NCALD	NCALD	15	15	0.0023679	0.00971957	computational_out.txt	Glioma
NTSR2	NTSR2	15	15	0.003419	0.0155331	computational_out.txt	Glioma
NQO1	NQO1	15	15	0.0036142	0.0160908	computational_out.txt	Glioma
NMB	NMB	15	15	0.0051504	0.0224796	computational_out.txt	Glioma
MYO10	MYO10	15	15	0.010634	0.0422612	computational_out.txt	Glioma
GNLY	GNLY	15	15	0.015087	0.022046	computational_out.txt	Glioma
MODULE_259	MODULE_259	15	15	0.016614	0.0338892	computational_out.txt	Glioma
GJB1	GJB1	15	15	0.026499	0.0348497	computational_out.txt	Glioma
GSE27786_CD8_TCELL_VS_NKCELL_UP	GSE27786_CD8_TCELL_VS_NKCELL_UP	15	15	4.3536e-06	8.71872e-06	immunologic_out.txt	Glioma
GSE15324_ELF4_KO_VS_WT_ACTIVATED_CD8_TCELL_DN	GSE15324_ELF4_KO_VS_WT_ACTIVATED_CD8_TCELL_DN	15	15	0.00015314	0.000175657	immunologic_out.txt	Glioma
GSE3982_EOSINOPHIL_VS_TH1_DN	GSE3982_EOSINOPHIL_VS_TH1_DN	15	15	0.00017693	0.00060857	immunologic_out.txt	Glioma
GSE9037_CTRL_VS_LPS_1H_STIM_BMDM_DN	GSE9037_CTRL_VS_LPS_1H_STIM_BMDM_DN	15	15	0.00038871	0.00470091	immunologic_out.txt	Glioma
GSE21927_SPLENIC_C26GM_TUMOROUS_VS_4T1_TUMOR_MONOCYTES_UP	GSE21927_SPLENIC_C26GM_TUMOROUS_VS_4T1_TUMOR_MONOCYTES_UP	15	15	0.00092359	0.00140703	immunologic_out.txt	Glioma
GSE15330_LYMPHOID_MULTIPOTENT_VS_PRO_BCELL_UP	GSE15330_LYMPHOID_MULTIPOTENT_VS_PRO_BCELL_UP	17	18	0.0043214	0.00499247	immunologic_out.txt	Glioma
GSE20366_CD103_POS_VS_NEG_TREG_KLRG1NEG_UP	GSE20366_CD103_POS_VS_NEG_TREG_KLRG1NEG_UP	15	15	0.0062223	0.00885295	immunologic_out.txt	Glioma
GSE25088_ROSIGLITAZONE_VS_IL4_AND_ROSIGLITAZONE_STIM_MACROPHAGE_DAY10_DN	GSE25088_ROSIGLITAZONE_VS_IL4_AND_ROSIGLITAZONE_STIM_MACROPHAGE_DAY10_DN	15	15	0.0076343	0.0135519	immunologic_out.txt	Glioma
GSE22589_HEALTHY_VS_HIV_INFECTED_DC_DN	GSE22589_HEALTHY_VS_HIV_INFECTED_DC_DN	15	15	0.0076772	0.0119959	immunologic_out.txt	Glioma
GSE1460_CORD_VS_ADULT_BLOOD_NAIVE_CD4_TCELL_UP	GSE1460_CORD_VS_ADULT_BLOOD_NAIVE_CD4_TCELL_UP	15	15	0.008281	0.00937475	immunologic_out.txt	Glioma
GSE17721_CTRL_VS_CPG_1H_BMDC_DN	GSE17721_CTRL_VS_CPG_1H_BMDC_DN	15	15	0.016503	0.020501	immunologic_out.txt	Glioma
GSE2405_HEAT_KILLED_VS_LIVE_A_PHAGOCYTOPHILUM_STIM_NEUTROPHIL_24H_DN	GSE2405_HEAT_KILLED_VS_LIVE_A_PHAGOCYTOPHILUM_STIM_NEUTROPHIL_24H_DN	15	15	0.018311	0.0309685	immunologic_out.txt	Glioma
PDGF_ERK_DN.V1_DN	PDGF_ERK_DN.V1_DN	15	15	0.0014519	0.00392202	oncogenic_out.txt	Glioma
PTTG2	PTTG2	45	45	1.8915e-54	1.34082e-53	computational_out.txt	Hemangiosarcoma
SLBP	SLBP	45	45	8.6863e-49	1.07185e-47	computational_out.txt	Hemangiosarcoma
MYCN	MYCN	45	45	6.0288e-44	2.37704e-43	computational_out.txt	Hemangiosarcoma
TMED3	TMED3	45	45	3.5853e-42	1.5249e-40	computational_out.txt	Hemangiosarcoma
TMEM248	TMEM248	45	45	3.5853e-42	1.5249e-40	computational_out.txt	Hemangiosarcoma
SMG7	SMG7	45	45	1.0863e-38	2.52502e-37	computational_out.txt	Hemangiosarcoma
SUGP2	SUGP2	45	45	1.0863e-38	2.52502e-37	computational_out.txt	Hemangiosarcoma
TIMP4	TIMP4	45	45	9.2098e-37	3.75722e-35	computational_out.txt	Hemangiosarcoma
TMEM161A	TMEM161A	45	45	9.2098e-37	3.75722e-35	computational_out.txt	Hemangiosarcoma
RCSD1	RCSD1	45	45	6.31e-36	5.00543e-35	computational_out.txt	Hemangiosarcoma
GNF2_BUB3	GNF2_BUB3	45	45	2.2692e-35	3.01404e-35	computational_out.txt	Hemangiosarcoma
SP140L	SP140L	45	45	2.4621e-34	5.02218e-33	computational_out.txt	Hemangiosarcoma
SSBP4	SSBP4	45	45	2.4621e-34	5.02218e-33	computational_out.txt	Hemangiosarcoma
SUSD4	SUSD4	45	45	1.0207e-32	2.45829e-31	computational_out.txt	Hemangiosarcoma
MODULE_458	MODULE_458	45	45	7.0849e-29	1.71047e-28	computational_out.txt	Hemangiosarcoma
IRF8	IRF8	45	45	7.8425e-27	1.24918e-26	computational_out.txt	Hemangiosarcoma
SNRPB2	SNRPB2	45	45	4.6484e-26	7.31665e-25	computational_out.txt	Hemangiosarcoma
TCTN1	TCTN1	45	45	5.224e-24	1.41119e-22	computational_out.txt	Hemangiosarcoma
MODULE_237	MODULE_237	25	30	1.5543e-12	3.11016e-12	computational_out.txt	Hemangiosarcoma
HALLMARK_DNA_REPAIR	HALLMARK_DNA_REPAIR	45	45	1.1165e-21	1.37415e-21	hallmark_out.txt	Hemangiosarcoma
HALLMARK_WNT_BETA_CATENIN_SIGNALING	HALLMARK_WNT_BETA_CATENIN_SIGNALING	45	45	2.0651e-15	4.95624e-14	hallmark_out.txt	Hemangiosarcoma
HALLMARK_E2F_TARGETS	HALLMARK_E2F_TARGETS	45	45	3.4641e-06	4.37571e-06	hallmark_out.txt	Hemangiosarcoma
HALLMARK_P53_PATHWAY	HALLMARK_P53_PATHWAY	45	45	1.6233e-05	5.5656e-05	hallmark_out.txt	Hemangiosarcoma
NAKAYA_PBMC_FLUMIST_AGE_18_50YO_7DY_IFN_SUBSET_UP	NAKAYA_PBMC_FLUMIST_AGE_18_50YO_7DY_IFN_SUBSET_UP	45	45	3.1594e-32	9.96339e-31	immunologic_out.txt	Hemangiosarcoma
GSE6681_DELETED_FOXP3_VS_WT_TREG_DN	GSE6681_DELETED_FOXP3_VS_WT_TREG_DN	47	68	5.6771e-30	4.53654e-29	immunologic_out.txt	Hemangiosarcoma
GSE12366_GC_BCELL_VS_PLASMA_CELL_UP	GSE12366_GC_BCELL_VS_PLASMA_CELL_UP	45	51	3.0549e-24	3.24346e-24	immunologic_out.txt	Hemangiosarcoma
GSE20198_IL12_VS_IFNA_TREATED_ACT_CD4_TCELL_UP	GSE20198_IL12_VS_IFNA_TREATED_ACT_CD4_TCELL_UP	45	46	1.4683e-23	2.08107e-23	immunologic_out.txt	Hemangiosarcoma
GSE6259_BCELL_VS_CD4_TCELL_UP	GSE6259_BCELL_VS_CD4_TCELL_UP	45	45	1.3483e-22	9.78533e-22	immunologic_out.txt	Hemangiosarcoma
GSE37301_MULTIPOTENT_PROGENITOR_VS_RAG2_KO_NK_CELL_DN	GSE37301_MULTIPOTENT_PROGENITOR_VS_RAG2_KO_NK_CELL_DN	47	68	5.5416e-20	1.61582e-19	immunologic_out.txt	Hemangiosarcoma
GSE20500_CTRL_VS_RARA_ANTAGONIST_TREATED_CD4_TCELL_DN	GSE20500_CTRL_VS_RARA_ANTAGONIST_TREATED_CD4_TCELL_DN	45	45	6.254e-18	8.94297e-18	immunologic_out.txt	Hemangiosarcoma
GSE17721_0.5H_VS_4H_LPS_BMDC_UP	GSE17721_0.5H_VS_4H_LPS_BMDC_UP	45	45	8.2779e-18	1.01519e-17	immunologic_out.txt	Hemangiosarcoma
GSE15659_NAIVE_CD4_TCELL_VS_RESTING_TREG_DN	GSE15659_NAIVE_CD4_TCELL_VS_RESTING_TREG_DN	45	45	8.4884e-18	9.87301e-18	immunologic_out.txt	Hemangiosarcoma
GSE25088_CTRL_VS_ROSIGLITAZONE_STIM_STAT6_KO_MACROPHAGE_UP	GSE25088_CTRL_VS_ROSIGLITAZONE_STIM_STAT6_KO_MACROPHAGE_UP	45	45	1.106e-17	1.95973e-17	immunologic_out.txt	Hemangiosarcoma
GSE27291_0H_VS_6H_STIM_GAMMADELTA_TCELL_UP	GSE27291_0H_VS_6H_STIM_GAMMADELTA_TCELL_UP	45	45	1.8952e-17	3.60919e-17	immunologic_out.txt	Hemangiosarcoma
GSE11961_MARGINAL_ZONE_BCELL_VS_PLASMA_CELL_DAY7_UP	GSE11961_MARGINAL_ZONE_BCELL_VS_PLASMA_CELL_DAY7_UP	45	45	1.2841e-16	1.35306e-16	immunologic_out.txt	Hemangiosarcoma
GSE20152_SPHK1_KO_VS_WT_HTNFA_OVERXPRESS_ANKLE_DN	GSE20152_SPHK1_KO_VS_WT_HTNFA_OVERXPRESS_ANKLE_DN	45	45	1.3905e-16	1.96817e-16	immunologic_out.txt	Hemangiosarcoma
GSE3982_BASOPHIL_VS_TH2_DN	GSE3982_BASOPHIL_VS_TH2_DN	45	45	1.561e-16	5.1082e-16	immunologic_out.txt	Hemangiosarcoma
GSE17721_CTRL_VS_CPG_6H_BMDC_UP	GSE17721_CTRL_VS_CPG_6H_BMDC_UP	45	45	1.2456e-15	1.55056e-15	immunologic_out.txt	Hemangiosarcoma
GSE21033_CTRL_VS_POLYIC_STIM_DC_12H_DN	GSE21033_CTRL_VS_POLYIC_STIM_DC_12H_DN	45	45	2.8527e-15	4.13505e-15	immunologic_out.txt	Hemangiosarcoma
GSE15659_CD45RA_NEG_CD4_TCELL_VS_NONSUPPRESSIVE_TCELL_DN	GSE15659_CD45RA_NEG_CD4_TCELL_VS_NONSUPPRESSIVE_TCELL_DN	47	52	4.9841e-15	5.78693e-15	immunologic_out.txt	Hemangiosarcoma
GSE24574_BCL6_LOW_TFH_VS_TCONV_CD4_TCELL_DN	GSE24574_BCL6_LOW_TFH_VS_TCONV_CD4_TCELL_DN	46	51	1.3301e-14	2.29316e-14	immunologic_out.txt	Hemangiosarcoma
GSE21033_CTRL_VS_POLYIC_STIM_DC_3H_UP	GSE21033_CTRL_VS_POLYIC_STIM_DC_3H_UP	45	45	1.6137e-14	2.34358e-14	immunologic_out.txt	Hemangiosarcoma
GSE15659_CD45RA_NEG_CD4_TCELL_VS_RESTING_TREG_DN	GSE15659_CD45RA_NEG_CD4_TCELL_VS_RESTING_TREG_DN	45	45	2.9359e-14	3.4103e-14	immunologic_out.txt	Hemangiosarcoma
SLAMF1	SLAMF1	45	45	1.0572e-13	8.48643e-12	immunologic_out.txt	Hemangiosarcoma
GSE22527_ANTI_CD3_INVIVO_VS_UNTREATED_MOUSE_TREG_DN	GSE22527_ANTI_CD3_INVIVO_VS_UNTREATED_MOUSE_TREG_DN	45	45	1.2391e-13	1.93365e-13	immunologic_out.txt	Hemangiosarcoma
GSE1112_OT1_VS_HY_CD8AB_THYMOCYTE_RTOC_CULTURE_UP	GSE1112_OT1_VS_HY_CD8AB_THYMOCYTE_RTOC_CULTURE_UP	45	45	1.7518e-13	1.82124e-13	immunologic_out.txt	Hemangiosarcoma
GSE20152_SPHK1_KO_VS_HTNFA_OVEREXPRESS_ANKLE_DN	GSE20152_SPHK1_KO_VS_HTNFA_OVEREXPRESS_ANKLE_DN	45	45	2.1501e-13	3.04172e-13	immunologic_out.txt	Hemangiosarcoma
GSE17721_CTRL_VS_GARDIQUIMOD_6H_BMDC_UP	GSE17721_CTRL_VS_GARDIQUIMOD_6H_BMDC_UP	45	45	3.2031e-13	4.00236e-13	immunologic_out.txt	Hemangiosarcoma
GSE27786_NKCELL_VS_NKTCELL_DN	GSE27786_NKCELL_VS_NKTCELL_DN	45	45	6.6388e-13	1.35435e-12	immunologic_out.txt	Hemangiosarcoma
GSE14308_TH2_VS_TH1_DN	GSE14308_TH2_VS_TH1_DN	45	45	8.8939e-13	9.93043e-13	immunologic_out.txt	Hemangiosarcoma
KAECH_DAY15_EFF_VS_MEMORY_CD8_TCELL_DN	KAECH_DAY15_EFF_VS_MEMORY_CD8_TCELL_DN	45	45	1.8654e-12	3.83058e-11	immunologic_out.txt	Hemangiosarcoma
GSE31082_DP_VS_CD4_SP_THYMOCYTE_DN	GSE31082_DP_VS_CD4_SP_THYMOCYTE_DN	45	45	2.8467e-12	6.49239e-12	immunologic_out.txt	Hemangiosarcoma
GSE26156_DOUBLE_POSITIVE_VS_CD4_SINGLE_POSITIVE_THYMOCYTE_DN	GSE26156_DOUBLE_POSITIVE_VS_CD4_SINGLE_POSITIVE_THYMOCYTE_DN	46	51	7.9216e-12	1.4517e-11	immunologic_out.txt	Hemangiosarcoma
GSE46606_DAY1_VS_DAY3_CD40L_IL2_IL5_STIMULATED_IRF4_KO_BCELL_UP	GSE46606_DAY1_VS_DAY3_CD40L_IL2_IL5_STIMULATED_IRF4_KO_BCELL_UP	45	45	1.6672e-11	9.22007e-11	immunologic_out.txt	Hemangiosarcoma
GSE17301_CTRL_VS_48H_ACD3_ACD28_STIM_CD8_TCELL_UP	GSE17301_CTRL_VS_48H_ACD3_ACD28_STIM_CD8_TCELL_UP	45	45	2.3823e-11	2.8882e-11	immunologic_out.txt	Hemangiosarcoma
GSE22033_UNTREATED_VS_ROSIGLITAZONE_TREATED_MEF_UP	GSE22033_UNTREATED_VS_ROSIGLITAZONE_TREATED_MEF_UP	45	45	3.7754e-11	5.79434e-11	immunologic_out.txt	Hemangiosarcoma
GSE21670_UNTREATED_VS_IL6_TREATED_STAT3_KO_CD4_TCELL_DN	GSE21670_UNTREATED_VS_IL6_TREATED_STAT3_KO_CD4_TCELL_DN	45	45	6.5314e-11	9.81656e-11	immunologic_out.txt	Hemangiosarcoma
GSE2770_IL12_AND_TGFB_ACT_VS_ACT_CD4_TCELL_48H_UP	GSE2770_IL12_AND_TGFB_ACT_VS_ACT_CD4_TCELL_48H_UP	45	45	7.7608e-11	1.48974e-10	immunologic_out.txt	Hemangiosarcoma
GSE20366_EX_VIVO_VS_DEC205_CONVERSION_NAIVE_CD4_TCELL_DN	GSE20366_EX_VIVO_VS_DEC205_CONVERSION_NAIVE_CD4_TCELL_DN	45	45	1.375e-10	1.95721e-10	immunologic_out.txt	Hemangiosarcoma
GSE17721_CTRL_VS_PAM3CSK4_4H_BMDC_UP	GSE17721_CTRL_VS_PAM3CSK4_4H_BMDC_UP	45	45	1.7018e-10	2.1416e-10	immunologic_out.txt	Hemangiosarcoma
GSE16385_MONOCYTE_VS_12H_ROSIGLITAZONE_IL4_TREATED_MACROPHAGE_DN	GSE16385_MONOCYTE_VS_12H_ROSIGLITAZONE_IL4_TREATED_MACROPHAGE_DN	45	45	2.0956e-10	2.48767e-10	immunologic_out.txt	Hemangiosarcoma
GSE9006_TYPE_1_VS_TYPE_2_DIABETES_PBMC_AT_DX_UP	GSE9006_TYPE_1_VS_TYPE_2_DIABETES_PBMC_AT_DX_UP	45	45	2.4434e-10	2.94208e-09	immunologic_out.txt	Hemangiosarcoma
GSE21670_TGFB_VS_TGFB_AND_IL6_TREATED_CD4_TCELL_DN	GSE21670_TGFB_VS_TGFB_AND_IL6_TREATED_CD4_TCELL_DN	45	45	2.8341e-10	4.25235e-10	immunologic_out.txt	Hemangiosarcoma
GSE5463_CTRL_VS_DEXAMETHASONE_TREATED_THYMOCYTE_UP	GSE5463_CTRL_VS_DEXAMETHASONE_TREATED_THYMOCYTE_UP	45	45	3.1034e-10	1.88121e-09	immunologic_out.txt	Hemangiosarcoma
GSE43863_LY6C_INT_CXCR5POS_VS_LY6C_LOW_CXCR5NEG_EFFECTOR_CD4_TCELL_UP	GSE43863_LY6C_INT_CXCR5POS_VS_LY6C_LOW_CXCR5NEG_EFFECTOR_CD4_TCELL_UP	45	45	3.3748e-10	1.55206e-09	immunologic_out.txt	Hemangiosarcoma
GSE2128_CTRL_VS_MIMETOPE_NEGATIVE_SELECTION_DP_THYMOCYTE_NOD_DN	GSE2128_CTRL_VS_MIMETOPE_NEGATIVE_SELECTION_DP_THYMOCYTE_NOD_DN	45	45	3.7643e-10	5.52292e-10	immunologic_out.txt	Hemangiosarcoma
GSE3039_B2_VS_B1_BCELL_DN	GSE3039_B2_VS_B1_BCELL_DN	45	45	7.5831e-10	1.69017e-09	immunologic_out.txt	Hemangiosarcoma
GSE28726_NAIVE_CD4_TCELL_VS_NAIVE_VA24NEG_NKTCELL_UP	GSE28726_NAIVE_CD4_TCELL_VS_NAIVE_VA24NEG_NKTCELL_UP	45	45	1.9391e-09	4.02877e-09	immunologic_out.txt	Hemangiosarcoma
GSE12845_IGD_POS_BLOOD_VS_NAIVE_TONSIL_BCELL_UP	GSE12845_IGD_POS_BLOOD_VS_NAIVE_TONSIL_BCELL_UP	45	45	2.416e-09	2.5869e-09	immunologic_out.txt	Hemangiosarcoma
GSE25087_FETAL_VS_ADULT_TCONV_UP	GSE25087_FETAL_VS_ADULT_TCONV_UP	45	51	2.5525e-09	4.49573e-09	immunologic_out.txt	Hemangiosarcoma
GSE25123_CTRL_VS_IL4_AND_ROSIGLITAZONE_STIM_MACROPHAGE_UP	GSE25123_CTRL_VS_IL4_AND_ROSIGLITAZONE_STIM_MACROPHAGE_UP	45	45	2.7764e-09	4.94932e-09	immunologic_out.txt	Hemangiosarcoma
GSE16450_CTRL_VS_IFNA_6H_STIM_MATURE_NEURON_CELL_LINE_DN	GSE16450_CTRL_VS_IFNA_6H_STIM_MATURE_NEURON_CELL_LINE_DN	45	45	3.2909e-09	3.9366e-09	immunologic_out.txt	Hemangiosarcoma
GSE8921_UNSTIM_VS_TLR1_2_STIM_MONOCYTE_6H_UP	GSE8921_UNSTIM_VS_TLR1_2_STIM_MONOCYTE_6H_UP	45	45	3.437e-09	3.99325e-08	immunologic_out.txt	Hemangiosarcoma
GSE9006_HEALTHY_VS_TYPE_2_DIABETES_PBMC_AT_DX_UP	GSE9006_HEALTHY_VS_TYPE_2_DIABETES_PBMC_AT_DX_UP	45	45	4.2762e-09	5.07967e-08	immunologic_out.txt	Hemangiosarcoma
GSE21033_1H_VS_12H_POLYIC_STIM_DC_DN	GSE21033_1H_VS_12H_POLYIC_STIM_DC_DN	29	29	5.5925e-09	8.08874e-09	immunologic_out.txt	Hemangiosarcoma
GSE43863_TFH_VS_LY6C_LOW_CXCR5NEG_EFFECTOR_CD4_TCELL_UP	GSE43863_TFH_VS_LY6C_LOW_CXCR5NEG_EFFECTOR_CD4_TCELL_UP	45	46	7.4971e-09	3.5088e-08	immunologic_out.txt	Hemangiosarcoma
GSE19401_NAIVE_VS_IMMUNIZED_MOUSE_PLN_FOLLICULAR_DC_DN	GSE19401_NAIVE_VS_IMMUNIZED_MOUSE_PLN_FOLLICULAR_DC_DN	45	45	9.7627e-09	1.3466e-08	immunologic_out.txt	Hemangiosarcoma
GSE21670_STAT3_KO_VS_WT_CD4_TCELL_DN	GSE21670_STAT3_KO_VS_WT_CD4_TCELL_DN	45	45	1.488e-08	2.22507e-08	immunologic_out.txt	Hemangiosarcoma
GSE17974_1.5H_VS_72H_IL4_AND_ANTI_IL12_ACT_CD4_TCELL_UP	GSE17974_1.5H_VS_72H_IL4_AND_ANTI_IL12_ACT_CD4_TCELL_UP	23	23	3.4592e-08	4.58859e-08	immunologic_out.txt	Hemangiosarcoma
GSE43955_1H_VS_42H_ACT_CD4_TCELL_WITH_TGFB_IL6_UP	GSE43955_1H_VS_42H_ACT_CD4_TCELL_WITH_TGFB_IL6_UP	45	45	3.6318e-08	1.74603e-07	immunologic_out.txt	Hemangiosarcoma
OXNAD1	OXNAD1	23	23	5.2214e-08	1.92104e-06	immunologic_out.txt	Hemangiosarcoma
GSE1791_CTRL_VS_NEUROMEDINU_IN_T_CELL_LINE_0.8H_UP	GSE1791_CTRL_VS_NEUROMEDINU_IN_T_CELL_LINE_0.8H_UP	45	45	5.7472e-08	7.56677e-08	immunologic_out.txt	Hemangiosarcoma
GSE21063_CTRL_VS_ANTI_IGM_STIM_BCELL_NFATC1_KO_3H_DN	GSE21063_CTRL_VS_ANTI_IGM_STIM_BCELL_NFATC1_KO_3H_DN	23	23	6.1002e-08	8.89592e-08	immunologic_out.txt	Hemangiosarcoma
GSE20500_CTRL_VS_RETINOIC_ACID_TREATED_CD4_TCELL_UP	GSE20500_CTRL_VS_RETINOIC_ACID_TREATED_CD4_TCELL_UP	45	45	1.0464e-07	1.49752e-07	immunologic_out.txt	Hemangiosarcoma
GSE22886_UNSTIM_VS_IL2_STIM_NKCELL_DN	GSE22886_UNSTIM_VS_IL2_STIM_NKCELL_DN	45	45	1.6188e-07	2.63971e-07	immunologic_out.txt	Hemangiosarcoma
GSE5589_WT_VS_IL6_KO_LPS_STIM_MACROPHAGE_45MIN_UP	GSE5589_WT_VS_IL6_KO_LPS_STIM_MACROPHAGE_45MIN_UP	28	29	1.6365e-07	1.12893e-06	immunologic_out.txt	Hemangiosarcoma
GSE45365_HEALTHY_VS_MCMV_INFECTION_CD8A_DC_UP	GSE45365_HEALTHY_VS_MCMV_INFECTION_CD8A_DC_UP	45	45	3.0134e-07	1.54102e-06	immunologic_out.txt	Hemangiosarcoma
KAECH_DAY8_EFF_VS_MEMORY_CD8_TCELL_DN	KAECH_DAY8_EFF_VS_MEMORY_CD8_TCELL_DN	45	45	5.7473e-07	1.19879e-05	immunologic_out.txt	Hemangiosarcoma
GSE9650_EFFECTOR_VS_MEMORY_CD8_TCELL_DN	GSE9650_EFFECTOR_VS_MEMORY_CD8_TCELL_DN	45	45	5.9323e-07	7.83774e-06	immunologic_out.txt	Hemangiosarcoma
GSE45365_WT_VS_IFNAR_KO_CD8A_DC_MCMV_INFECTION_UP	GSE45365_WT_VS_IFNAR_KO_CD8A_DC_MCMV_INFECTION_UP	45	45	6.3645e-07	3.34847e-06	immunologic_out.txt	Hemangiosarcoma
GSE360_CTRL_VS_M_TUBERCULOSIS_DC_UP	GSE360_CTRL_VS_M_TUBERCULOSIS_DC_UP	45	45	7.0024e-07	1.80617e-06	immunologic_out.txt	Hemangiosarcoma
GSE360_LOW_DOSE_B_MALAYI_VS_M_TUBERCULOSIS_DC_UP	GSE360_LOW_DOSE_B_MALAYI_VS_M_TUBERCULOSIS_DC_UP	45	45	2.0405e-06	5.34119e-06	immunologic_out.txt	Hemangiosarcoma
GSE14308_TH2_VS_TH17_DN	GSE14308_TH2_VS_TH17_DN	45	45	2.7442e-06	3.06273e-06	immunologic_out.txt	Hemangiosarcoma
GSE21360_PRIMARY_VS_QUATERNARY_MEMORY_CD8_TCELL_DN	GSE21360_PRIMARY_VS_QUATERNARY_MEMORY_CD8_TCELL_DN	23	23	2.9292e-06	4.30961e-06	immunologic_out.txt	Hemangiosarcoma
GSE42021_CD24HI_TREG_VS_CD24HI_TCONV_THYMUS_UP	GSE42021_CD24HI_TREG_VS_CD24HI_TCONV_THYMUS_UP	45	45	4.5601e-06	1.98028e-05	immunologic_out.txt	Hemangiosarcoma
GSE360_T_GONDII_VS_B_MALAYI_LOW_DOSE_MAC_DN	GSE360_T_GONDII_VS_B_MALAYI_LOW_DOSE_MAC_DN	45	45	7.7026e-06	2.06207e-05	immunologic_out.txt	Hemangiosarcoma
GSE40666_UNTREATED_VS_IFNA_STIM_CD8_TCELL_90MIN_DN	GSE40666_UNTREATED_VS_IFNA_STIM_CD8_TCELL_90MIN_DN	23	23	1.4707e-05	5.69158e-05	immunologic_out.txt	Hemangiosarcoma
GSE21927_SPLENIC_VS_TUMOR_MONOCYTES_FROM_C26GM_TUMOROUS_MICE_BALBC_DN	GSE21927_SPLENIC_VS_TUMOR_MONOCYTES_FROM_C26GM_TUMOROUS_MICE_BALBC_DN	23	23	1.78e-05	2.7138e-05	immunologic_out.txt	Hemangiosarcoma
GSE36009_UNSTIM_VS_LPS_STIM_DC_DN	GSE36009_UNSTIM_VS_LPS_STIM_DC_DN	23	23	2.1053e-05	5.32405e-05	immunologic_out.txt	Hemangiosarcoma
GSE17974_2H_VS_72H_UNTREATED_IN_VITRO_CD4_TCELL_UP	GSE17974_2H_VS_72H_UNTREATED_IN_VITRO_CD4_TCELL_UP	23	23	3.4549e-05	4.58978e-05	immunologic_out.txt	Hemangiosarcoma
GSE3982_EFF_MEMORY_CD4_TCELL_VS_TH2_DN	GSE3982_EFF_MEMORY_CD4_TCELL_VS_TH2_DN	45	46	3.7665e-05	0.000127671	immunologic_out.txt	Hemangiosarcoma
GSE3982_MAST_CELL_VS_MAC_UP	GSE3982_MAST_CELL_VS_MAC_UP	45	45	5.5518e-05	0.000195049	immunologic_out.txt	Hemangiosarcoma
GSE40666_STAT1_KO_VS_STAT4_KO_CD8_TCELL_WITH_IFNA_STIM_90MIN_UP	GSE40666_STAT1_KO_VS_STAT4_KO_CD8_TCELL_WITH_IFNA_STIM_90MIN_UP	23	23	6.3358e-05	0.000245015	immunologic_out.txt	Hemangiosarcoma
GSE6875_TCONV_VS_FOXP3_KO_TREG_DN	GSE6875_TCONV_VS_FOXP3_KO_TREG_DN	45	45	7.3588e-05	0.000589817	immunologic_out.txt	Hemangiosarcoma
GSE41867_NAIVE_VS_DAY8_LCMV_ARMSTRONG_EFFECTOR_CD8_TCELL_DN	GSE41867_NAIVE_VS_DAY8_LCMV_ARMSTRONG_EFFECTOR_CD8_TCELL_DN	23	23	8.6834e-05	0.00037011	immunologic_out.txt	Hemangiosarcoma
GSE21063_CTRL_VS_ANTI_IGM_STIM_BCELL_NFATC1_KO_8H_UP	GSE21063_CTRL_VS_ANTI_IGM_STIM_BCELL_NFATC1_KO_8H_UP	23	23	9.516e-05	0.000138886	immunologic_out.txt	Hemangiosarcoma
GSE9650_NAIVE_VS_EFF_CD8_TCELL_UP	GSE9650_NAIVE_VS_EFF_CD8_TCELL_UP	45	45	0.00011296	0.00151894	immunologic_out.txt	Hemangiosarcoma
KAECH_NAIVE_VS_DAY8_EFF_CD8_TCELL_UP	KAECH_NAIVE_VS_DAY8_EFF_CD8_TCELL_UP	45	45	0.00015999	0.00340412	immunologic_out.txt	Hemangiosarcoma
GSE21927_C26GM_VS_4T1_TUMOR_MONOCYTE_BALBC_DN	GSE21927_C26GM_VS_4T1_TUMOR_MONOCYTE_BALBC_DN	23	23	0.00020539	0.000310636	immunologic_out.txt	Hemangiosarcoma
GSE15215_CD2_POS_VS_NEG_PDC_DN	GSE15215_CD2_POS_VS_NEG_PDC_DN	28	29	0.00021419	0.000245464	immunologic_out.txt	Hemangiosarcoma
GSE28237_FOLLICULAR_VS_EARLY_GC_BCELL_UP	GSE28237_FOLLICULAR_VS_EARLY_GC_BCELL_UP	23	23	0.00022159	0.000456803	immunologic_out.txt	Hemangiosarcoma
GSE17721_LPS_VS_GARDIQUIMOD_1H_BMDC_DN	GSE17721_LPS_VS_GARDIQUIMOD_1H_BMDC_DN	23	23	0.00023537	0.000299397	immunologic_out.txt	Hemangiosarcoma
GSE37301_GRANULOCYTE_MONOCYTE_PROGENITOR_VS_RAG2_KO_NK_CELL_UP	GSE37301_GRANULOCYTE_MONOCYTE_PROGENITOR_VS_RAG2_KO_NK_CELL_UP	24	24	0.00031305	0.000895539	immunologic_out.txt	Hemangiosarcoma
GSE5589_UNSTIM_VS_180MIN_LPS_AND_IL10_STIM_MACROPHAGE_UP	GSE5589_UNSTIM_VS_180MIN_LPS_AND_IL10_STIM_MACROPHAGE_UP	23	23	0.00040044	0.00266524	immunologic_out.txt	Hemangiosarcoma
GSE17721_LPS_VS_POLYIC_4H_BMDC_UP	GSE17721_LPS_VS_POLYIC_4H_BMDC_UP	24	24	0.00041483	0.00053318	immunologic_out.txt	Hemangiosarcoma
GSE27291_0H_VS_7D_STIM_GAMMADELTA_TCELL_DN	GSE27291_0H_VS_7D_STIM_GAMMADELTA_TCELL_DN	23	23	0.00043957	0.000837412	immunologic_out.txt	Hemangiosarcoma
GSE36476_CTRL_VS_TSST_ACT_16H_MEMORY_CD4_TCELL_YOUNG_UP	GSE36476_CTRL_VS_TSST_ACT_16H_MEMORY_CD4_TCELL_YOUNG_UP	23	23	0.000618	0.0016722	immunologic_out.txt	Hemangiosarcoma
GSE16522_MEMORY_VS_NAIVE_CD8_TCELL_DN	GSE16522_MEMORY_VS_NAIVE_CD8_TCELL_DN	23	23	0.00069065	0.000829908	immunologic_out.txt	Hemangiosarcoma
GSE13493_DP_VS_CD8POS_THYMOCYTE_UP	GSE13493_DP_VS_CD8POS_THYMOCYTE_UP	23	23	0.00072827	0.000795213	immunologic_out.txt	Hemangiosarcoma
GSE7348_LPS_VS_TOLERIZED_AND_LPS_STIM_MACROPHAGE_UP	GSE7348_LPS_VS_TOLERIZED_AND_LPS_STIM_MACROPHAGE_UP	23	23	0.001092	0.00903971	immunologic_out.txt	Hemangiosarcoma
MICB	MICB	28	29	0.001237	0.0326051	immunologic_out.txt	Hemangiosarcoma
GSE36476_CTRL_VS_TSST_ACT_40H_MEMORY_CD4_TCELL_YOUNG_UP	GSE36476_CTRL_VS_TSST_ACT_40H_MEMORY_CD4_TCELL_YOUNG_UP	23	23	0.0014129	0.00383088	immunologic_out.txt	Hemangiosarcoma
GALC	GALC	23	23	0.0016633	0.00168815	immunologic_out.txt	Hemangiosarcoma
GSE37301_MULTIPOTENT_PROGENITOR_VS_PRO_BCELL_DN	GSE37301_MULTIPOTENT_PROGENITOR_VS_PRO_BCELL_DN	23	23	0.001926	0.00560965	immunologic_out.txt	Hemangiosarcoma
GSE7548_NAIVE_VS_DAY28_PCC_IMMUNIZATION_CD4_TCELL_UP	GSE7548_NAIVE_VS_DAY28_PCC_IMMUNIZATION_CD4_TCELL_UP	28	29	0.002993	0.0274341	immunologic_out.txt	Hemangiosarcoma
GSE34156_NOD2_LIGAND_VS_NOD2_AND_TLR1_TLR2_LIGAND_6H_TREATED_MONOCYTE_DN	GSE34156_NOD2_LIGAND_VS_NOD2_AND_TLR1_TLR2_LIGAND_6H_TREATED_MONOCYTE_DN	23	23	0.0035449	0.00868279	immunologic_out.txt	Hemangiosarcoma
GSE21927_SPLEEN_C57BL6_VS_EL4_TUMOR_BALBC_MONOCYTES_UP	GSE21927_SPLEEN_C57BL6_VS_EL4_TUMOR_BALBC_MONOCYTES_UP	23	23	0.005186	0.00786811	immunologic_out.txt	Hemangiosarcoma
GSE42021_CD24HI_VS_CD24LOW_TREG_THYMUS_DN	GSE42021_CD24HI_VS_CD24LOW_TREG_THYMUS_DN	23	23	0.0053043	0.0231675	immunologic_out.txt	Hemangiosarcoma
GSE5589_UNSTIM_VS_180MIN_LPS_STIM_MACROPHAGE_UP	GSE5589_UNSTIM_VS_180MIN_LPS_STIM_MACROPHAGE_UP	23	23	0.0060326	0.0402528	immunologic_out.txt	Hemangiosarcoma
GSE42021_TCONV_PLN_VS_CD24INT_TCONV_THYMUS_UP	GSE42021_TCONV_PLN_VS_CD24INT_TCONV_THYMUS_UP	23	23	0.0063552	0.0280582	immunologic_out.txt	Hemangiosarcoma
GSE20366_CD103_POS_VS_CD103_KLRG1_DP_TREG_DN	GSE20366_CD103_POS_VS_CD103_KLRG1_DP_TREG_DN	23	23	0.0073462	0.0104428	immunologic_out.txt	Hemangiosarcoma
GSE25088_CTRL_VS_IL4_AND_ROSIGLITAZONE_STIM_MACROPHAGE_UP	GSE25088_CTRL_VS_IL4_AND_ROSIGLITAZONE_STIM_MACROPHAGE_UP	23	23	0.0076853	0.0135722	immunologic_out.txt	Hemangiosarcoma
GSE17721_POLYIC_VS_PAM3CSK4_24H_BMDC_DN	GSE17721_POLYIC_VS_PAM3CSK4_24H_BMDC_DN	23	23	0.0077103	0.0101187	immunologic_out.txt	Hemangiosarcoma
BUCASAS_PBMC_FLUARIX_FLUVIRIN_CAUCASIAN_MALE_AGE_18_40YO_LOW_RESPONDERS_1DY_POSITIVE_PREDICTIVE_OF_TITER	BUCASAS_PBMC_FLUARIX_FLUVIRIN_CAUCASIAN_MALE_AGE_18_40YO_LOW_RESPONDERS_1DY_POSITIVE_PREDICTIVE_OF_TITER	6	6	0.0080831	0.00809992	immunologic_out.txt	Hemangiosarcoma
GSE42021_CD24INT_VS_CD24LOW_TCONV_THYMUS_DN	GSE42021_CD24INT_VS_CD24LOW_TCONV_THYMUS_DN	29	29	0.0082006	0.0359361	immunologic_out.txt	Hemangiosarcoma
GSE2706_2H_VS_8H_R848_STIM_DC_DN	GSE2706_2H_VS_8H_R848_STIM_DC_DN	23	23	0.011555	0.021701	immunologic_out.txt	Hemangiosarcoma
GSE19888_ADENOSINE_A3R_INH_PRETREAT_AND_ACT_BY_A3R_VS_A3R_INH_AND_TCELL_MEMBRANES_ACT_MAST_CELL_UP	GSE19888_ADENOSINE_A3R_INH_PRETREAT_AND_ACT_BY_A3R_VS_A3R_INH_AND_TCELL_MEMBRANES_ACT_MAST_CELL_UP	23	23	0.011945	0.0166451	immunologic_out.txt	Hemangiosarcoma
GSE37534_UNTREATED_VS_ROSIGLITAZONE_TREATED_CD4_TCELL_PPARG1_AND_FOXP3_TRASDUCED_DN	GSE37534_UNTREATED_VS_ROSIGLITAZONE_TREATED_CD4_TCELL_PPARG1_AND_FOXP3_TRASDUCED_DN	23	23	0.014467	0.0444326	immunologic_out.txt	Hemangiosarcoma
GSE24142_ADULT_VS_FETAL_EARLY_THYMIC_PROGENITOR_UP	GSE24142_ADULT_VS_FETAL_EARLY_THYMIC_PROGENITOR_UP	23	23	0.015886	0.0270103	immunologic_out.txt	Hemangiosarcoma
GSE1112_OT1_CD8AB_VS_HY_CD8AA_THYMOCYTE_RTOC_CULTURE_DN	GSE1112_OT1_CD8AB_VS_HY_CD8AA_THYMOCYTE_RTOC_CULTURE_DN	23	23	0.019933	0.0207109	immunologic_out.txt	Hemangiosarcoma
GSE26030_UNSTIM_VS_RESTIM_TH1_DAY5_POST_POLARIZATION_UP	GSE26030_UNSTIM_VS_RESTIM_TH1_DAY5_POST_POLARIZATION_UP	23	23	0.020112	0.0368442	immunologic_out.txt	Hemangiosarcoma
GSE21670_TGFB_VS_TGFB_AND_IL6_TREATED_STAT3_KO_CD4_TCELL_UP	GSE21670_TGFB_VS_TGFB_AND_IL6_TREATED_STAT3_KO_CD4_TCELL_UP	23	23	0.026147	0.039265	immunologic_out.txt	Hemangiosarcoma
P53_DN.V2_UP	P53_DN.V2_UP	45	45	6.3533e-13	1.65186e-12	oncogenic_out.txt	Hemangiosarcoma
GCNP_SHH_UP_LATE.V1_UP	GCNP_SHH_UP_LATE.V1_UP	23	23	0.0045621	0.00668251	oncogenic_out.txt	Hemangiosarcoma
MODULE_237	MODULE_237	50	50	1.0073e-17	2.01662e-17	computational_out.txt	Mammary
PTTG2	PTTG2	16	16	2.0433e-09	1.45285e-08	computational_out.txt	Mammary
SLBP	SLBP	16	16	4.0059e-08	4.9713e-07	computational_out.txt	Mammary
MYCN	MYCN	16	16	4.4858e-07	1.77127e-06	computational_out.txt	Mammary
TMED3	TMED3	16	16	8.2508e-07	3.50747e-05	computational_out.txt	Mammary
TMEM248	TMEM248	16	16	8.2508e-07	3.50747e-05	computational_out.txt	Mammary
SMG7	SMG7	16	16	5.8873e-06	0.000136777	computational_out.txt	Mammary
SUGP2	SUGP2	16	16	5.8873e-06	0.000136777	computational_out.txt	Mammary
TIMP4	TIMP4	16	16	1.3444e-05	0.000548186	computational_out.txt	Mammary
TMEM161A	TMEM161A	16	16	1.3444e-05	0.000548186	computational_out.txt	Mammary
GNF2_BUB3	GNF2_BUB3	16	16	2.7431e-05	3.64409e-05	computational_out.txt	Mammary
RCSD1	RCSD1	16	16	3.6078e-05	0.000287187	computational_out.txt	Mammary
SP140L	SP140L	16	16	5.2457e-05	0.00106948	computational_out.txt	Mammary
SSBP4	SSBP4	16	16	5.2457e-05	0.00106948	computational_out.txt	Mammary
SUSD4	SUSD4	16	16	0.0002654	0.00638879	computational_out.txt	Mammary
MODULE_458	MODULE_458	16	16	0.00094689	0.00228765	computational_out.txt	Mammary
IRF8	IRF8	16	16	0.0022586	0.00359863	computational_out.txt	Mammary
SNRPB2	SNRPB2	16	16	0.0031151	0.0493966	computational_out.txt	Mammary
MODULE_303	MODULE_303	7	7	0.0085579	0.0181322	computational_out.txt	Mammary
HALLMARK_DNA_REPAIR	HALLMARK_DNA_REPAIR	16	16	0.01697	0.0208862	hallmark_out.txt	Mammary
HALLMARK_COMPLEMENT	HALLMARK_COMPLEMENT	50	50	0.023248	0.0278976	hallmark_out.txt	Mammary
OXNAD1	OXNAD1	56	57	7.2975e-25	2.68487e-23	immunologic_out.txt	Mammary
GSE21063_CTRL_VS_ANTI_IGM_STIM_BCELL_NFATC1_KO_3H_DN	GSE21063_CTRL_VS_ANTI_IGM_STIM_BCELL_NFATC1_KO_3H_DN	56	57	6.9973e-24	1.02042e-23	immunologic_out.txt	Mammary
GSE17974_1.5H_VS_72H_IL4_AND_ANTI_IL12_ACT_CD4_TCELL_UP	GSE17974_1.5H_VS_72H_IL4_AND_ANTI_IL12_ACT_CD4_TCELL_UP	50	50	6.7246e-20	8.92011e-20	immunologic_out.txt	Mammary
GALC	GALC	64	71	1.8581e-19	1.88586e-19	immunologic_out.txt	Mammary
GSE5589_WT_VS_IL6_KO_LPS_STIM_MACROPHAGE_45MIN_UP	GSE5589_WT_VS_IL6_KO_LPS_STIM_MACROPHAGE_45MIN_UP	55	60	6.3542e-18	4.38341e-17	immunologic_out.txt	Mammary
GSE40666_UNTREATED_VS_IFNA_STIM_CD8_TCELL_90MIN_DN	GSE40666_UNTREATED_VS_IFNA_STIM_CD8_TCELL_90MIN_DN	57	57	1.2887e-16	4.98724e-16	immunologic_out.txt	Mammary
GSE6681_DELETED_FOXP3_VS_WT_TREG_DN	GSE6681_DELETED_FOXP3_VS_WT_TREG_DN	62	66	2.3682e-16	1.89242e-15	immunologic_out.txt	Mammary
GSE21033_1H_VS_12H_POLYIC_STIM_DC_DN	GSE21033_1H_VS_12H_POLYIC_STIM_DC_DN	50	50	1.1179e-15	1.61688e-15	immunologic_out.txt	Mammary
GSE21360_PRIMARY_VS_QUATERNARY_MEMORY_CD8_TCELL_DN	GSE21360_PRIMARY_VS_QUATERNARY_MEMORY_CD8_TCELL_DN	50	50	2.1933e-15	3.22691e-15	immunologic_out.txt	Mammary
GSE21063_CTRL_VS_ANTI_IGM_STIM_BCELL_NFATC1_KO_8H_UP	GSE21063_CTRL_VS_ANTI_IGM_STIM_BCELL_NFATC1_KO_8H_UP	56	57	4.2221e-15	6.16217e-15	immunologic_out.txt	Mammary
GSE28237_FOLLICULAR_VS_EARLY_GC_BCELL_UP	GSE28237_FOLLICULAR_VS_EARLY_GC_BCELL_UP	56	57	6.0423e-14	1.24561e-13	immunologic_out.txt	Mammary
GSE36009_UNSTIM_VS_LPS_STIM_DC_DN	GSE36009_UNSTIM_VS_LPS_STIM_DC_DN	50	50	2.3035e-13	5.82527e-13	immunologic_out.txt	Mammary
GSE21927_SPLENIC_VS_TUMOR_MONOCYTES_FROM_C26GM_TUMOROUS_MICE_BALBC_DN	GSE21927_SPLENIC_VS_TUMOR_MONOCYTES_FROM_C26GM_TUMOROUS_MICE_BALBC_DN	50	50	2.5223e-13	3.84551e-13	immunologic_out.txt	Mammary
GSE36476_CTRL_VS_TSST_ACT_16H_MEMORY_CD4_TCELL_YOUNG_UP	GSE36476_CTRL_VS_TSST_ACT_16H_MEMORY_CD4_TCELL_YOUNG_UP	56	57	5.1414e-13	1.39117e-12	immunologic_out.txt	Mammary
GSE17974_2H_VS_72H_UNTREATED_IN_VITRO_CD4_TCELL_UP	GSE17974_2H_VS_72H_UNTREATED_IN_VITRO_CD4_TCELL_UP	50	50	2.4443e-12	3.24722e-12	immunologic_out.txt	Mammary
GSE40666_STAT1_KO_VS_STAT4_KO_CD8_TCELL_WITH_IFNA_STIM_90MIN_UP	GSE40666_STAT1_KO_VS_STAT4_KO_CD8_TCELL_WITH_IFNA_STIM_90MIN_UP	50	50	4.721e-12	1.82568e-11	immunologic_out.txt	Mammary
GSE41867_NAIVE_VS_DAY8_LCMV_ARMSTRONG_EFFECTOR_CD8_TCELL_DN	GSE41867_NAIVE_VS_DAY8_LCMV_ARMSTRONG_EFFECTOR_CD8_TCELL_DN	50	50	5.5183e-12	2.35205e-11	immunologic_out.txt	Mammary
GSE36476_CTRL_VS_TSST_ACT_40H_MEMORY_CD4_TCELL_YOUNG_UP	GSE36476_CTRL_VS_TSST_ACT_40H_MEMORY_CD4_TCELL_YOUNG_UP	56	57	1.2826e-11	3.47759e-11	immunologic_out.txt	Mammary
GSE21927_C26GM_VS_4T1_TUMOR_MONOCYTE_BALBC_DN	GSE21927_C26GM_VS_4T1_TUMOR_MONOCYTE_BALBC_DN	50	50	3.2697e-11	4.94515e-11	immunologic_out.txt	Mammary
GSE17721_LPS_VS_GARDIQUIMOD_1H_BMDC_DN	GSE17721_LPS_VS_GARDIQUIMOD_1H_BMDC_DN	50	50	5.0936e-11	6.47921e-11	immunologic_out.txt	Mammary
GSE15215_CD2_POS_VS_NEG_PDC_DN	GSE15215_CD2_POS_VS_NEG_PDC_DN	55	60	7.2461e-11	8.3041e-11	immunologic_out.txt	Mammary
GSE21670_TGFB_VS_TGFB_AND_IL6_TREATED_STAT3_KO_CD4_TCELL_UP	GSE21670_TGFB_VS_TGFB_AND_IL6_TREATED_STAT3_KO_CD4_TCELL_UP	58	64	1.6297e-10	2.44732e-10	immunologic_out.txt	Mammary
GSE37301_GRANULOCYTE_MONOCYTE_PROGENITOR_VS_RAG2_KO_NK_CELL_UP	GSE37301_GRANULOCYTE_MONOCYTE_PROGENITOR_VS_RAG2_KO_NK_CELL_UP	50	50	3.2028e-10	9.16222e-10	immunologic_out.txt	Mammary
GSE27291_0H_VS_7D_STIM_GAMMADELTA_TCELL_DN	GSE27291_0H_VS_7D_STIM_GAMMADELTA_TCELL_DN	50	50	6.4881e-10	1.23603e-09	immunologic_out.txt	Mammary
GSE5589_UNSTIM_VS_180MIN_LPS_AND_IL10_STIM_MACROPHAGE_UP	GSE5589_UNSTIM_VS_180MIN_LPS_AND_IL10_STIM_MACROPHAGE_UP	50	50	8.8696e-10	5.90341e-09	immunologic_out.txt	Mammary
GSE7348_LPS_VS_TOLERIZED_AND_LPS_STIM_MACROPHAGE_UP	GSE7348_LPS_VS_TOLERIZED_AND_LPS_STIM_MACROPHAGE_UP	50	50	1.179e-09	9.75991e-09	immunologic_out.txt	Mammary
GSE16522_MEMORY_VS_NAIVE_CD8_TCELL_DN	GSE16522_MEMORY_VS_NAIVE_CD8_TCELL_DN	50	50	1.2304e-09	1.47849e-09	immunologic_out.txt	Mammary
GSE37301_MULTIPOTENT_PROGENITOR_VS_RAG2_KO_NK_CELL_DN	GSE37301_MULTIPOTENT_PROGENITOR_VS_RAG2_KO_NK_CELL_DN	62	66	2.0819e-09	6.07039e-09	immunologic_out.txt	Mammary
GSE17721_LPS_VS_POLYIC_4H_BMDC_UP	GSE17721_LPS_VS_POLYIC_4H_BMDC_UP	50	50	2.1013e-09	2.7008e-09	immunologic_out.txt	Mammary
GSE13493_DP_VS_CD8POS_THYMOCYTE_UP	GSE13493_DP_VS_CD8POS_THYMOCYTE_UP	50	50	2.1923e-09	2.39382e-09	immunologic_out.txt	Mammary
MICB	MICB	55	60	3.6906e-09	9.72776e-08	immunologic_out.txt	Mammary
GSE37301_MULTIPOTENT_PROGENITOR_VS_PRO_BCELL_DN	GSE37301_MULTIPOTENT_PROGENITOR_VS_PRO_BCELL_DN	50	50	1.9625e-08	5.71596e-08	immunologic_out.txt	Mammary
GSE7548_NAIVE_VS_DAY28_PCC_IMMUNIZATION_CD4_TCELL_UP	GSE7548_NAIVE_VS_DAY28_PCC_IMMUNIZATION_CD4_TCELL_UP	55	60	6.9273e-08	6.34963e-07	immunologic_out.txt	Mammary
GSE17721_POLYIC_VS_PAM3CSK4_24H_BMDC_DN	GSE17721_POLYIC_VS_PAM3CSK4_24H_BMDC_DN	50	50	7.8314e-08	1.02776e-07	immunologic_out.txt	Mammary
GSE42021_CD24HI_VS_CD24LOW_TREG_THYMUS_DN	GSE42021_CD24HI_VS_CD24LOW_TREG_THYMUS_DN	50	50	8.504e-08	3.71428e-07	immunologic_out.txt	Mammary
GSE21927_SPLEEN_C57BL6_VS_EL4_TUMOR_BALBC_MONOCYTES_UP	GSE21927_SPLEEN_C57BL6_VS_EL4_TUMOR_BALBC_MONOCYTES_UP	50	50	8.6165e-08	1.30728e-07	immunologic_out.txt	Mammary
GSE22432_PDC_VS_TGFB1_TREATEDCOMMON_DC_PROGENITOR_DN	GSE22432_PDC_VS_TGFB1_TREATEDCOMMON_DC_PROGENITOR_DN	56	57	2.3911e-07	3.71824e-07	immunologic_out.txt	Mammary
GSE34156_NOD2_LIGAND_VS_NOD2_AND_TLR1_TLR2_LIGAND_6H_TREATED_MONOCYTE_DN	GSE34156_NOD2_LIGAND_VS_NOD2_AND_TLR1_TLR2_LIGAND_6H_TREATED_MONOCYTE_DN	50	50	2.9514e-07	7.22909e-07	immunologic_out.txt	Mammary
GSE5589_UNSTIM_VS_180MIN_LPS_STIM_MACROPHAGE_UP	GSE5589_UNSTIM_VS_180MIN_LPS_STIM_MACROPHAGE_UP	50	50	3.1157e-07	2.07896e-06	immunologic_out.txt	Mammary
GSE42021_TCONV_PLN_VS_CD24INT_TCONV_THYMUS_UP	GSE42021_TCONV_PLN_VS_CD24INT_TCONV_THYMUS_UP	50	50	4.3017e-07	1.8992e-06	immunologic_out.txt	Mammary
GSE20366_CD103_POS_VS_CD103_KLRG1_DP_TREG_DN	GSE20366_CD103_POS_VS_CD103_KLRG1_DP_TREG_DN	50	50	5.6163e-07	7.98368e-07	immunologic_out.txt	Mammary
GSE27434_WT_VS_DNMT1_KO_TREG_DN	GSE27434_WT_VS_DNMT1_KO_TREG_DN	63	74	6.3751e-07	1.21625e-06	immunologic_out.txt	Mammary
GSE37534_UNTREATED_VS_ROSIGLITAZONE_TREATED_CD4_TCELL_PPARG1_AND_FOXP3_TRASDUCED_DN	GSE37534_UNTREATED_VS_ROSIGLITAZONE_TREATED_CD4_TCELL_PPARG1_AND_FOXP3_TRASDUCED_DN	50	50	7.0738e-07	2.17258e-06	immunologic_out.txt	Mammary
GSE25088_CTRL_VS_IL4_AND_ROSIGLITAZONE_STIM_MACROPHAGE_UP	GSE25088_CTRL_VS_IL4_AND_ROSIGLITAZONE_STIM_MACROPHAGE_UP	50	50	1.0031e-06	1.77147e-06	immunologic_out.txt	Mammary
GSE2706_2H_VS_8H_R848_STIM_DC_DN	GSE2706_2H_VS_8H_R848_STIM_DC_DN	50	50	1.2409e-06	2.33048e-06	immunologic_out.txt	Mammary
GSE19888_ADENOSINE_A3R_INH_PRETREAT_AND_ACT_BY_A3R_VS_A3R_INH_AND_TCELL_MEMBRANES_ACT_MAST_CELL_UP	GSE19888_ADENOSINE_A3R_INH_PRETREAT_AND_ACT_BY_A3R_VS_A3R_INH_AND_TCELL_MEMBRANES_ACT_MAST_CELL_UP	50	50	1.259e-06	1.75439e-06	immunologic_out.txt	Mammary
GSE43863_TH1_VS_TFH_EFFECTOR_CD4_TCELL_DN	GSE43863_TH1_VS_TFH_EFFECTOR_CD4_TCELL_DN	50	50	2.3376e-06	1.10085e-05	immunologic_out.txt	Mammary
GSE1112_OT1_CD8AB_VS_HY_CD8AA_THYMOCYTE_RTOC_CULTURE_DN	GSE1112_OT1_CD8AB_VS_HY_CD8AA_THYMOCYTE_RTOC_CULTURE_DN	50	50	4.5205e-06	4.69692e-06	immunologic_out.txt	Mammary
GSE24142_ADULT_VS_FETAL_EARLY_THYMIC_PROGENITOR_UP	GSE24142_ADULT_VS_FETAL_EARLY_THYMIC_PROGENITOR_UP	50	50	4.7787e-06	8.12502e-06	immunologic_out.txt	Mammary
GSE7348_UNSTIM_VS_LPS_STIM_MACROPHAGE_DN	GSE7348_UNSTIM_VS_LPS_STIM_MACROPHAGE_DN	50	50	8.3321e-06	6.90821e-05	immunologic_out.txt	Mammary
GSE9650_GP33_VS_GP276_LCMV_SPECIFIC_EXHAUSTED_CD8_TCELL_DN	GSE9650_GP33_VS_GP276_LCMV_SPECIFIC_EXHAUSTED_CD8_TCELL_DN	50	50	1.0097e-05	0.000134745	immunologic_out.txt	Mammary
GSE26030_UNSTIM_VS_RESTIM_TH1_DAY5_POST_POLARIZATION_UP	GSE26030_UNSTIM_VS_RESTIM_TH1_DAY5_POST_POLARIZATION_UP	50	50	1.0509e-05	1.9252e-05	immunologic_out.txt	Mammary
GSE43955_10H_VS_60H_ACT_CD4_TCELL_DN	GSE43955_10H_VS_60H_ACT_CD4_TCELL_DN	50	50	1.9625e-05	9.30826e-05	immunologic_out.txt	Mammary
GSE29618_BCELL_VS_PDC_DAY7_FLU_VACCINE_UP	GSE29618_BCELL_VS_PDC_DAY7_FLU_VACCINE_UP	50	50	3.382e-05	7.26006e-05	immunologic_out.txt	Mammary
GSE13485_CTRL_VS_DAY3_YF17D_VACCINE_PBMC_UP	GSE13485_CTRL_VS_DAY3_YF17D_VACCINE_PBMC_UP	50	50	4.8237e-05	5.24332e-05	immunologic_out.txt	Mammary
GSE15330_MEGAKARYOCYTE_ERYTHROID_VS_GRANULOCYTE_MONOCYTE_PROGENITOR_IKAROS_KO_DN	GSE15330_MEGAKARYOCYTE_ERYTHROID_VS_GRANULOCYTE_MONOCYTE_PROGENITOR_IKAROS_KO_DN	50	50	5.7176e-05	6.61105e-05	immunologic_out.txt	Mammary
GSE12366_GC_BCELL_VS_PLASMA_CELL_UP	GSE12366_GC_BCELL_VS_PLASMA_CELL_UP	22	26	0.00010993	0.000116715	immunologic_out.txt	Mammary
GSE15330_HSC_VS_MEGAKARYOCYTE_ERYTHROID_PROGENITOR_IKAROS_KO_UP	GSE15330_HSC_VS_MEGAKARYOCYTE_ERYTHROID_PROGENITOR_IKAROS_KO_UP	50	50	0.00011375	0.000825545	immunologic_out.txt	Mammary
GSE6259_BCELL_VS_CD4_TCELL_UP	GSE6259_BCELL_VS_CD4_TCELL_UP	23	23	0.00011375	0.000825545	immunologic_out.txt	Mammary
GSE37605_C57BL6_VS_NOD_FOXP3_FUSION_GFP_TCONV_DN	GSE37605_C57BL6_VS_NOD_FOXP3_FUSION_GFP_TCONV_DN	50	50	0.00016606	0.000511206	immunologic_out.txt	Mammary
NAKAYA_PBMC_FLUMIST_AGE_18_50YO_7DY_IFN_SUBSET_UP	NAKAYA_PBMC_FLUMIST_AGE_18_50YO_7DY_IFN_SUBSET_UP	16	16	0.00023359	0.00736643	immunologic_out.txt	Mammary
GSE42021_CD24INT_VS_CD24LOW_TCONV_THYMUS_DN	GSE42021_CD24INT_VS_CD24LOW_TCONV_THYMUS_DN	50	50	0.00036197	0.0015862	immunologic_out.txt	Mammary
GSE37301_MULTIPOTENT_PROGENITOR_VS_COMMON_LYMPHOID_PROGENITOR_DN	GSE37301_MULTIPOTENT_PROGENITOR_VS_COMMON_LYMPHOID_PROGENITOR_DN	50	50	0.00041436	0.00120289	immunologic_out.txt	Mammary
GSE13485_PRE_VS_POST_YF17D_VACCINATION_PBMC_UP	GSE13485_PRE_VS_POST_YF17D_VACCINATION_PBMC_UP	50	50	0.00045967	0.000501303	immunologic_out.txt	Mammary
NAKAYA_MYELOID_DENDRITIC_CELL_FLUMIST_AGE_18_50YO_7DY_DN	NAKAYA_MYELOID_DENDRITIC_CELL_FLUMIST_AGE_18_50YO_7DY_DN	58	64	0.00063626	0.0180262	immunologic_out.txt	Mammary
BUCASAS_PBMC_FLUARIX_FLUVIRIN_CAUCASIAN_MALE_AGE_18_40YO_LOW_RESPONDERS_1DY_POSITIVE_PREDICTIVE_OF_TITER	BUCASAS_PBMC_FLUARIX_FLUVIRIN_CAUCASIAN_MALE_AGE_18_40YO_LOW_RESPONDERS_1DY_POSITIVE_PREDICTIVE_OF_TITER	10	10	0.0011852	0.00118767	immunologic_out.txt	Mammary
GSE28237_FOLLICULAR_VS_LATE_GC_BCELL_DN	GSE28237_FOLLICULAR_VS_LATE_GC_BCELL_DN	50	50	0.0034079	0.00702805	immunologic_out.txt	Mammary
GSE18791_CTRL_VS_NEWCASTLE_VIRUS_DC_12H_UP	GSE18791_CTRL_VS_NEWCASTLE_VIRUS_DC_12H_UP	7	7	0.009114	0.0123053	immunologic_out.txt	Mammary
GSE20198_IL12_VS_IFNA_TREATED_ACT_CD4_TCELL_UP	GSE20198_IL12_VS_IFNA_TREATED_ACT_CD4_TCELL_UP	16	16	0.015949	0.0226051	immunologic_out.txt	Mammary
GSE22033_UNTREATED_VS_ROSIGLITAZONE_TREATED_MEF_UP	GSE22033_UNTREATED_VS_ROSIGLITAZONE_TREATED_MEF_UP	30	30	0.019969	0.0306477	immunologic_out.txt	Mammary
GSE27786_LIN_NEG_VS_NEUTROPHIL_DN	GSE27786_LIN_NEG_VS_NEUTROPHIL_DN	14	14	0.022022	0.0443791	immunologic_out.txt	Mammary
GSE22432_MULTIPOTENT_VS_COMMON_DC_PROGENITOR_UNTREATED_DN	GSE22432_MULTIPOTENT_VS_COMMON_DC_PROGENITOR_UNTREATED_DN	14	14	0.022879	0.0355463	immunologic_out.txt	Mammary
GCNP_SHH_UP_LATE.V1_UP	GCNP_SHH_UP_LATE.V1_UP	50	50	1.8278e-07	2.67734e-07	oncogenic_out.txt	Mammary
DEAF1	DEAF1	9	9	1.7839e-06	1.91721e-06	computational_out.txt	MastCell
MORF_PAPSS1	MORF_PAPSS1	9	9	4.7405e-06	1.56116e-05	computational_out.txt	MastCell
GGCT	GGCT	9	9	5.0016e-06	6.56481e-06	computational_out.txt	MastCell
DDOST	DDOST	9	9	5.6867e-06	6.0855e-06	computational_out.txt	MastCell
FAM168B	FAM168B	9	9	2.3057e-05	2.56774e-05	computational_out.txt	MastCell
EIF3H	EIF3H	9	9	2.9983e-05	3.28417e-05	computational_out.txt	MastCell
TGFB1	TGFB1	7	7	5.3905e-05	0.00163267	computational_out.txt	MastCell
MORF_MAP2K2	MORF_MAP2K2	9	9	9.6094e-05	0.000307347	computational_out.txt	MastCell
CSK	CSK	9	9	9.9438e-05	0.000105006	computational_out.txt	MastCell
RFC3	RFC3	7	7	0.00021431	0.00171362	computational_out.txt	MastCell
MORF_CCNI	MORF_CCNI	9	9	0.00070562	0.00203834	computational_out.txt	MastCell
SULT4A1	SULT4A1	7	7	0.0010579	0.0248793	computational_out.txt	MastCell
SNRPB2	SNRPB2	7	7	0.0011407	0.0179548	computational_out.txt	MastCell
DUT	DUT	4	4	0.0036683	0.00398746	computational_out.txt	MastCell
DNAJC8	DNAJC8	4	4	0.0041754	0.00451657	computational_out.txt	MastCell
EIF3G	EIF3G	5	5	0.007938	0.00869007	computational_out.txt	MastCell
EMP3	EMP3	4	4	0.0085672	0.00943572	computational_out.txt	MastCell
COMT	COMT	4	4	0.0090174	0.00943758	computational_out.txt	MastCell
FGFR1	FGFR1	4	4	0.0101	0.0113682	computational_out.txt	MastCell
MORF_ESPL1	MORF_ESPL1	4	4	0.010689	0.0323257	computational_out.txt	MastCell
MORF_CDC10	MORF_CDC10	4	4	0.011149	0.0322998	computational_out.txt	MastCell
DDX49	DDX49	4	4	0.017428	0.0187204	computational_out.txt	MastCell
DRG1	DRG1	5	5	0.01822	0.0197837	computational_out.txt	MastCell
FBP1	FBP1	4	4	0.018637	0.0208014	computational_out.txt	MastCell
COX7C	COX7C	5	5	0.019619	0.0206195	computational_out.txt	MastCell
FCER1G	FCER1G	4	4	0.024321	0.0272063	computational_out.txt	MastCell
CNIH1	CNIH1	4	4	0.027584	0.0287339	computational_out.txt	MastCell
EPOR	EPOR	4	4	0.034365	0.0379744	computational_out.txt	MastCell
DDX39A	DDX39A	4	4	0.034829	0.0373916	computational_out.txt	MastCell
FADS2	FADS2	4	4	0.036965	0.0411202	computational_out.txt	MastCell
DDX18	DDX18	4	4	0.038253	0.0410235	computational_out.txt	MastCell
GSE26928_EFF_MEMORY_VS_CXCR5_POS_CD4_TCELL_UP	GSE26928_EFF_MEMORY_VS_CXCR5_POS_CD4_TCELL_UP	9	10	3.496e-05	6.53664e-05	immunologic_out.txt	MastCell
GSE9988_ANTI_TREM1_VS_CTRL_TREATED_MONOCYTES_DN	GSE9988_ANTI_TREM1_VS_CTRL_TREATED_MONOCYTES_DN	9	9	0.0002601	0.00389195	immunologic_out.txt	MastCell
GSE12963_ENV_NEF_VS_ENV_NEF_AND_VPR_DEFICIENT_HIV1_INF_CD4_TCELL_UP	GSE12963_ENV_NEF_VS_ENV_NEF_AND_VPR_DEFICIENT_HIV1_INF_CD4_TCELL_UP	7	7	0.0009422	0.00101131	immunologic_out.txt	MastCell
GSE21380_TFH_VS_GERMINAL_CENTER_TFH_CD4_TCELL_DN	GSE21380_TFH_VS_GERMINAL_CENTER_TFH_CD4_TCELL_DN	10	12	0.00098662	0.00146144	immunologic_out.txt	MastCell
GSE9988_ANTI_TREM1_AND_LPS_VS_CTRL_TREATED_MONOCYTES_DN	GSE9988_ANTI_TREM1_AND_LPS_VS_CTRL_TREATED_MONOCYTES_DN	9	9	0.0013578	0.0199785	immunologic_out.txt	MastCell
GSE22589_HIV_VS_HIV_AND_SIV_INFECTED_DC_DN	GSE22589_HIV_VS_HIV_AND_SIV_INFECTED_DC_DN	7	7	0.001578	0.0024686	immunologic_out.txt	MastCell
FPR2	FPR2	9	9	0.001617	0.00163521	immunologic_out.txt	MastCell
GSE9988_ANTI_TREM1_AND_LPS_VS_VEHICLE_TREATED_MONOCYTES_DN	GSE9988_ANTI_TREM1_AND_LPS_VS_VEHICLE_TREATED_MONOCYTES_DN	9	9	0.0024054	0.0355905	immunologic_out.txt	MastCell
GSE9988_ANTI_TREM1_VS_VEHICLE_TREATED_MONOCYTES_DN	GSE9988_ANTI_TREM1_VS_VEHICLE_TREATED_MONOCYTES_DN	9	9	0.0031068	0.0472894	immunologic_out.txt	MastCell
GSE21033_3H_VS_24H_POLYIC_STIM_DC_DN	GSE21033_3H_VS_24H_POLYIC_STIM_DC_DN	5	5	0.0037691	0.00546087	immunologic_out.txt	MastCell
GSE6090_UNSTIM_VS_DC_SIGN_STIM_DC_UP	GSE6090_UNSTIM_VS_DC_SIGN_STIM_DC_UP	6	6	0.0039058	0.0275486	immunologic_out.txt	MastCell
GSE17974_0H_VS_4H_IN_VITRO_ACT_CD4_TCELL_DN	GSE17974_0H_VS_4H_IN_VITRO_ACT_CD4_TCELL_DN	7	7	0.0040198	0.00532322	immunologic_out.txt	MastCell
GSE22229_UNTREATED_VS_IMMUNOSUPP_THERAPY_RENAL_TRANSPLANT_PATIENT_PBMC_UP	GSE22229_UNTREATED_VS_IMMUNOSUPP_THERAPY_RENAL_TRANSPLANT_PATIENT_PBMC_UP	7	7	0.0046403	0.00717655	immunologic_out.txt	MastCell
GARCIA_PINERES_PBMC_HPV_16_L1_VLP_AGE_18_25YO_12MO_CORRELATED_WITH_ANTIBODY_RESPONSE_NEGATIVE	GARCIA_PINERES_PBMC_HPV_16_L1_VLP_AGE_18_25YO_12MO_CORRELATED_WITH_ANTIBODY_RESPONSE_NEGATIVE	4	4	0.0049279	0.00500731	immunologic_out.txt	MastCell
GARCIA_PINERES_PBMC_HPV_16_L1_VLP_AGE_18_25YO_7MO_CORRELATED_WITH_ANTIBODY_RESPONSE_NEGATIVE	GARCIA_PINERES_PBMC_HPV_16_L1_VLP_AGE_18_25YO_7MO_CORRELATED_WITH_ANTIBODY_RESPONSE_NEGATIVE	4	4	0.0049279	0.00500731	immunologic_out.txt	MastCell
GSE17721_LPS_VS_PAM3CSK4_4H_BMDC_DN	GSE17721_LPS_VS_PAM3CSK4_4H_BMDC_DN	7	7	0.0063745	0.00815597	immunologic_out.txt	MastCell
GSE3982_BASOPHIL_VS_TH1_DN	GSE3982_BASOPHIL_VS_TH1_DN	7	7	0.0098603	0.0322407	immunologic_out.txt	MastCell
GSE33162_UNTREATED_VS_4H_LPS_STIM_HDAC3_KO_MACROPHAGE_UP	GSE33162_UNTREATED_VS_4H_LPS_STIM_HDAC3_KO_MACROPHAGE_UP	9	9	0.010362	0.024713	immunologic_out.txt	MastCell
GSE40685_NAIVE_CD4_TCELL_VS_TREG_UP	GSE40685_NAIVE_CD4_TCELL_VS_TREG_UP	7	7	0.011981	0.0470447	immunologic_out.txt	MastCell
GSE17974_CTRL_VS_ACT_IL4_AND_ANTI_IL12_4H_CD4_TCELL_DN	GSE17974_CTRL_VS_ACT_IL4_AND_ANTI_IL12_4H_CD4_TCELL_DN	7	7	0.012201	0.0162629	immunologic_out.txt	MastCell
GSE3982_BASOPHIL_VS_TH2_DN	GSE3982_BASOPHIL_VS_TH2_DN	7	7	0.013721	0.0449197	immunologic_out.txt	MastCell
GSE14908_ATOPIC_VS_NONATOPIC_PATIENT_RESTING_CD4_TCELL_DN	GSE14908_ATOPIC_VS_NONATOPIC_PATIENT_RESTING_CD4_TCELL_DN	7	7	0.015063	0.017233	immunologic_out.txt	MastCell
GSE17974_IL4_AND_ANTI_IL12_VS_UNTREATED_0.5H_ACT_CD4_TCELL_DN	GSE17974_IL4_AND_ANTI_IL12_VS_UNTREATED_0.5H_ACT_CD4_TCELL_DN	7	7	0.018275	0.0243958	immunologic_out.txt	MastCell
GSE11864_CSF1_VS_CSF1_PAM3CYS_IN_MAC_DN	GSE11864_CSF1_VS_CSF1_PAM3CYS_IN_MAC_DN	7	7	0.018298	0.0190871	immunologic_out.txt	MastCell
GSE3039_ALPHABETA_CD8_TCELL_VS_B2_BCELL_UP	GSE3039_ALPHABETA_CD8_TCELL_VS_B2_BCELL_UP	6	6	0.020281	0.045195	immunologic_out.txt	MastCell
GSE11864_UNTREATED_VS_CSF1_PAM3CYS_IN_MAC_DN	GSE11864_UNTREATED_VS_CSF1_PAM3CYS_IN_MAC_DN	7	7	0.021024	0.0219653	immunologic_out.txt	MastCell
GSE14415_INDUCED_TREG_VS_TCONV_UP	GSE14415_INDUCED_TREG_VS_TCONV_UP	7	7	0.024012	0.0270563	immunologic_out.txt	MastCell
GSE12198_CTRL_VS_LOW_IL2_STIM_NK_CELL_DN	GSE12198_CTRL_VS_LOW_IL2_STIM_NK_CELL_DN	7	7	0.026079	0.0276502	immunologic_out.txt	MastCell
GSE11961_MEMORY_BCELL_DAY40_VS_GERMINAL_CENTER_BCELL_DAY40_UP	GSE11961_MEMORY_BCELL_DAY40_VS_GERMINAL_CENTER_BCELL_DAY40_UP	5	5	0.03227	0.0340168	immunologic_out.txt	MastCell
GSE1112_OT1_VS_HY_CD8AB_THYMOCYTE_RTOC_CULTURE_UP	GSE1112_OT1_VS_HY_CD8AB_THYMOCYTE_RTOC_CULTURE_UP	7	7	0.042902	0.0446029	immunologic_out.txt	MastCell
PTTG2	PTTG2	14	14	2.9929e-07	2.12156e-06	computational_out.txt	Melanoma
SLBP	SLBP	14	14	2.0596e-06	2.54144e-05	computational_out.txt	Melanoma
MYCN	MYCN	14	14	1.5618e-05	6.15787e-05	computational_out.txt	Melanoma
TMED3	TMED3	14	14	1.9748e-05	0.00083992	computational_out.txt	Melanoma
TMEM248	TMEM248	14	14	1.9748e-05	0.00083992	computational_out.txt	Melanoma
SMG7	SMG7	14	14	7.6952e-05	0.00178869	computational_out.txt	Melanoma
SUGP2	SUGP2	14	14	7.6952e-05	0.00178869	computational_out.txt	Melanoma
GNF2_BUB3	GNF2_BUB3	14	14	0.00013611	0.000180787	computational_out.txt	Melanoma
TIMP4	TIMP4	14	14	0.00013947	0.00568981	computational_out.txt	Melanoma
TMEM161A	TMEM161A	14	14	0.00013947	0.00568981	computational_out.txt	Melanoma
SP140L	SP140L	14	14	0.00037033	0.00755398	computational_out.txt	Melanoma
SSBP4	SSBP4	14	14	0.00037033	0.00755398	computational_out.txt	Melanoma
RCSD1	RCSD1	14	14	0.00041322	0.00327788	computational_out.txt	Melanoma
SUSD4	SUSD4	14	14	0.0017134	0.0412661	computational_out.txt	Melanoma
MODULE_458	MODULE_458	14	14	0.0041494	0.0100177	computational_out.txt	Melanoma
IRF8	IRF8	14	14	0.0097605	0.0155468	computational_out.txt	Melanoma
GSE20152_SPHK1_KO_VS_HTNFA_OVEREXPRESS_ANKLE_DN	GSE20152_SPHK1_KO_VS_HTNFA_OVEREXPRESS_ANKLE_DN	24	25	0.01732	0.0245024	immunologic_out.txt	Melanoma
PTTG2	PTTG2	54	54	2.6848e-63	1.90316e-62	computational_out.txt	Osteosarcoma
SLBP	SLBP	54	54	3.0086e-56	3.71246e-55	computational_out.txt	Osteosarcoma
MYCN	MYCN	54	54	4.0356e-50	1.59116e-49	computational_out.txt	Osteosarcoma
TMED3	TMED3	54	54	8.8229e-50	3.75255e-48	computational_out.txt	Osteosarcoma
TMEM248	TMEM248	54	54	8.8229e-50	3.75255e-48	computational_out.txt	Osteosarcoma
SMG7	SMG7	54	54	2.3862e-45	5.54653e-44	computational_out.txt	Osteosarcoma
SUGP2	SUGP2	54	54	2.3862e-45	5.54653e-44	computational_out.txt	Osteosarcoma
TIMP4	TIMP4	54	54	3.2594e-43	1.3297e-41	computational_out.txt	Osteosarcoma
TMEM161A	TMEM161A	54	54	3.2594e-43	1.3297e-41	computational_out.txt	Osteosarcoma
RCSD1	RCSD1	54	54	6.8427e-41	5.428e-40	computational_out.txt	Osteosarcoma
SP140L	SP140L	54	54	3.8456e-40	7.84424e-39	computational_out.txt	Osteosarcoma
SSBP4	SSBP4	54	54	3.8456e-40	7.84424e-39	computational_out.txt	Osteosarcoma
GNF2_BUB3	GNF2_BUB3	54	54	3.4658e-39	4.60341e-39	computational_out.txt	Osteosarcoma
SUSD4	SUSD4	54	54	4.0599e-36	9.778e-35	computational_out.txt	Osteosarcoma
MODULE_458	MODULE_458	54	54	4.6479e-32	1.12212e-31	computational_out.txt	Osteosarcoma
SNRPB2	SNRPB2	54	54	6.2727e-30	9.87333e-29	computational_out.txt	Osteosarcoma
IRF8	IRF8	54	54	1.2398e-29	1.97479e-29	computational_out.txt	Osteosarcoma
TCTN1	TCTN1	54	54	3.6378e-27	9.82698e-26	computational_out.txt	Osteosarcoma
GNF2_DDX5	GNF2_DDX5	10	10	0.024864	0.0336742	computational_out.txt	Osteosarcoma
GAVISH_3CA_MALIGNANT_METAPROGRAM_4_CHROMATIN	GAVISH_3CA_MALIGNANT_METAPROGRAM_4_CHROMATIN	10	10	0.037302	0.043378	computational_out.txt	Osteosarcoma
HALLMARK_DNA_REPAIR	HALLMARK_DNA_REPAIR	54	54	7.2079e-24	8.87126e-24	hallmark_out.txt	Osteosarcoma
HALLMARK_WNT_BETA_CATENIN_SIGNALING	HALLMARK_WNT_BETA_CATENIN_SIGNALING	54	54	4.5581e-17	1.09394e-15	hallmark_out.txt	Osteosarcoma
HALLMARK_E2F_TARGETS	HALLMARK_E2F_TARGETS	54	54	1.206e-06	1.52337e-06	hallmark_out.txt	Osteosarcoma
HALLMARK_P53_PATHWAY	HALLMARK_P53_PATHWAY	54	54	2.7865e-05	9.55371e-05	hallmark_out.txt	Osteosarcoma
NAKAYA_PBMC_FLUMIST_AGE_18_50YO_7DY_IFN_SUBSET_UP	NAKAYA_PBMC_FLUMIST_AGE_18_50YO_7DY_IFN_SUBSET_UP	54	54	3.5459e-35	1.11822e-33	immunologic_out.txt	Osteosarcoma
GSE12366_GC_BCELL_VS_PLASMA_CELL_UP	GSE12366_GC_BCELL_VS_PLASMA_CELL_UP	54	64	7.1049e-29	7.54344e-29	immunologic_out.txt	Osteosarcoma
GSE20198_IL12_VS_IFNA_TREATED_ACT_CD4_TCELL_UP	GSE20198_IL12_VS_IFNA_TREATED_ACT_CD4_TCELL_UP	54	54	1.4227e-24	2.01644e-24	immunologic_out.txt	Osteosarcoma
GSE6259_BCELL_VS_CD4_TCELL_UP	GSE6259_BCELL_VS_CD4_TCELL_UP	54	54	3.4937e-24	2.53556e-23	immunologic_out.txt	Osteosarcoma
GSE25088_CTRL_VS_ROSIGLITAZONE_STIM_STAT6_KO_MACROPHAGE_UP	GSE25088_CTRL_VS_ROSIGLITAZONE_STIM_STAT6_KO_MACROPHAGE_UP	54	54	6.9036e-20	1.22325e-19	immunologic_out.txt	Osteosarcoma
GSE17721_0.5H_VS_4H_LPS_BMDC_UP	GSE17721_0.5H_VS_4H_LPS_BMDC_UP	54	54	7.3397e-20	9.00133e-20	immunologic_out.txt	Osteosarcoma
GSE15659_NAIVE_CD4_TCELL_VS_RESTING_TREG_DN	GSE15659_NAIVE_CD4_TCELL_VS_RESTING_TREG_DN	54	54	9.5226e-20	1.10759e-19	immunologic_out.txt	Osteosarcoma
GSE20500_CTRL_VS_RARA_ANTAGONIST_TREATED_CD4_TCELL_DN	GSE20500_CTRL_VS_RARA_ANTAGONIST_TREATED_CD4_TCELL_DN	54	54	1.2633e-19	1.80647e-19	immunologic_out.txt	Osteosarcoma
GSE27291_0H_VS_6H_STIM_GAMMADELTA_TCELL_UP	GSE27291_0H_VS_6H_STIM_GAMMADELTA_TCELL_UP	54	54	5.6618e-19	1.07822e-18	immunologic_out.txt	Osteosarcoma
GSE11961_MARGINAL_ZONE_BCELL_VS_PLASMA_CELL_DAY7_UP	GSE11961_MARGINAL_ZONE_BCELL_VS_PLASMA_CELL_DAY7_UP	54	54	2.4498e-18	2.58135e-18	immunologic_out.txt	Osteosarcoma
GSE3982_BASOPHIL_VS_TH2_DN	GSE3982_BASOPHIL_VS_TH2_DN	54	54	3.3593e-18	1.09929e-17	immunologic_out.txt	Osteosarcoma
GSE20152_SPHK1_KO_VS_WT_HTNFA_OVERXPRESS_ANKLE_DN	GSE20152_SPHK1_KO_VS_WT_HTNFA_OVERXPRESS_ANKLE_DN	54	54	7.2679e-18	1.02873e-17	immunologic_out.txt	Osteosarcoma
GSE21033_CTRL_VS_POLYIC_STIM_DC_12H_DN	GSE21033_CTRL_VS_POLYIC_STIM_DC_12H_DN	54	54	1.4718e-16	2.13341e-16	immunologic_out.txt	Osteosarcoma
GSE17721_CTRL_VS_CPG_6H_BMDC_UP	GSE17721_CTRL_VS_CPG_6H_BMDC_UP	54	54	1.8794e-16	2.33954e-16	immunologic_out.txt	Osteosarcoma
GSE15659_CD45RA_NEG_CD4_TCELL_VS_RESTING_TREG_DN	GSE15659_CD45RA_NEG_CD4_TCELL_VS_RESTING_TREG_DN	54	54	9.9461e-16	1.15533e-15	immunologic_out.txt	Osteosarcoma
GSE21033_CTRL_VS_POLYIC_STIM_DC_3H_UP	GSE21033_CTRL_VS_POLYIC_STIM_DC_3H_UP	54	54	2.5084e-15	3.64296e-15	immunologic_out.txt	Osteosarcoma
GSE22527_ANTI_CD3_INVIVO_VS_UNTREATED_MOUSE_TREG_DN	GSE22527_ANTI_CD3_INVIVO_VS_UNTREATED_MOUSE_TREG_DN	54	54	1.0208e-14	1.59299e-14	immunologic_out.txt	Osteosarcoma
SLAMF1	SLAMF1	54	54	1.2741e-14	1.02275e-12	immunologic_out.txt	Osteosarcoma
GSE6681_DELETED_FOXP3_VS_WT_TREG_DN	GSE6681_DELETED_FOXP3_VS_WT_TREG_DN	54	54	2.0633e-14	1.64877e-13	immunologic_out.txt	Osteosarcoma
GSE27786_NKCELL_VS_NKTCELL_DN	GSE27786_NKCELL_VS_NKTCELL_DN	54	54	3.0242e-14	6.16951e-14	immunologic_out.txt	Osteosarcoma
GSE14308_TH2_VS_TH1_DN	GSE14308_TH2_VS_TH1_DN	54	54	3.7841e-14	4.22511e-14	immunologic_out.txt	Osteosarcoma
GSE1112_OT1_VS_HY_CD8AB_THYMOCYTE_RTOC_CULTURE_UP	GSE1112_OT1_VS_HY_CD8AB_THYMOCYTE_RTOC_CULTURE_UP	54	54	4.3611e-14	4.53397e-14	immunologic_out.txt	Osteosarcoma
GSE20152_SPHK1_KO_VS_HTNFA_OVEREXPRESS_ANKLE_DN	GSE20152_SPHK1_KO_VS_HTNFA_OVEREXPRESS_ANKLE_DN	54	54	5.0991e-14	7.21363e-14	immunologic_out.txt	Osteosarcoma
GSE17721_CTRL_VS_GARDIQUIMOD_6H_BMDC_UP	GSE17721_CTRL_VS_GARDIQUIMOD_6H_BMDC_UP	54	54	7.6652e-14	9.57788e-14	immunologic_out.txt	Osteosarcoma
GSE31082_DP_VS_CD4_SP_THYMOCYTE_DN	GSE31082_DP_VS_CD4_SP_THYMOCYTE_DN	54	54	6.4749e-13	1.47671e-12	immunologic_out.txt	Osteosarcoma
KAECH_DAY15_EFF_VS_MEMORY_CD8_TCELL_DN	KAECH_DAY15_EFF_VS_MEMORY_CD8_TCELL_DN	54	54	9.71e-13	1.99394e-11	immunologic_out.txt	Osteosarcoma
GSE46606_DAY1_VS_DAY3_CD40L_IL2_IL5_STIMULATED_IRF4_KO_BCELL_UP	GSE46606_DAY1_VS_DAY3_CD40L_IL2_IL5_STIMULATED_IRF4_KO_BCELL_UP	54	54	5.0337e-12	2.78377e-11	immunologic_out.txt	Osteosarcoma
GSE15659_CD45RA_NEG_CD4_TCELL_VS_NONSUPPRESSIVE_TCELL_DN	GSE15659_CD45RA_NEG_CD4_TCELL_VS_NONSUPPRESSIVE_TCELL_DN	54	54	5.4523e-12	6.33055e-12	immunologic_out.txt	Osteosarcoma
GSE21670_UNTREATED_VS_IL6_TREATED_STAT3_KO_CD4_TCELL_DN	GSE21670_UNTREATED_VS_IL6_TREATED_STAT3_KO_CD4_TCELL_DN	54	54	1.6058e-11	2.41348e-11	immunologic_out.txt	Osteosarcoma
GSE2770_IL12_AND_TGFB_ACT_VS_ACT_CD4_TCELL_48H_UP	GSE2770_IL12_AND_TGFB_ACT_VS_ACT_CD4_TCELL_48H_UP	54	54	1.6351e-11	3.13868e-11	immunologic_out.txt	Osteosarcoma
GSE24574_BCL6_LOW_TFH_VS_TCONV_CD4_TCELL_DN	GSE24574_BCL6_LOW_TFH_VS_TCONV_CD4_TCELL_DN	54	54	1.6868e-11	2.90812e-11	immunologic_out.txt	Osteosarcoma
GSE22033_UNTREATED_VS_ROSIGLITAZONE_TREATED_MEF_UP	GSE22033_UNTREATED_VS_ROSIGLITAZONE_TREATED_MEF_UP	54	54	1.7919e-11	2.75014e-11	immunologic_out.txt	Osteosarcoma
GSE17301_CTRL_VS_48H_ACD3_ACD28_STIM_CD8_TCELL_UP	GSE17301_CTRL_VS_48H_ACD3_ACD28_STIM_CD8_TCELL_UP	54	54	2.0769e-11	2.51794e-11	immunologic_out.txt	Osteosarcoma
GSE20366_EX_VIVO_VS_DEC205_CONVERSION_NAIVE_CD4_TCELL_DN	GSE20366_EX_VIVO_VS_DEC205_CONVERSION_NAIVE_CD4_TCELL_DN	54	54	2.1372e-11	3.04215e-11	immunologic_out.txt	Osteosarcoma
GSE17721_CTRL_VS_PAM3CSK4_4H_BMDC_UP	GSE17721_CTRL_VS_PAM3CSK4_4H_BMDC_UP	54	54	4.367e-11	5.49557e-11	immunologic_out.txt	Osteosarcoma
GSE43863_LY6C_INT_CXCR5POS_VS_LY6C_LOW_CXCR5NEG_EFFECTOR_CD4_TCELL_UP	GSE43863_LY6C_INT_CXCR5POS_VS_LY6C_LOW_CXCR5NEG_EFFECTOR_CD4_TCELL_UP	54	54	9.0706e-11	4.17153e-10	immunologic_out.txt	Osteosarcoma
GSE16385_MONOCYTE_VS_12H_ROSIGLITAZONE_IL4_TREATED_MACROPHAGE_DN	GSE16385_MONOCYTE_VS_12H_ROSIGLITAZONE_IL4_TREATED_MACROPHAGE_DN	54	54	1.9752e-10	2.34475e-10	immunologic_out.txt	Osteosarcoma
GSE5463_CTRL_VS_DEXAMETHASONE_TREATED_THYMOCYTE_UP	GSE5463_CTRL_VS_DEXAMETHASONE_TREATED_THYMOCYTE_UP	54	54	2.3834e-10	1.44477e-09	immunologic_out.txt	Osteosarcoma
GSE9006_TYPE_1_VS_TYPE_2_DIABETES_PBMC_AT_DX_UP	GSE9006_TYPE_1_VS_TYPE_2_DIABETES_PBMC_AT_DX_UP	54	54	2.7971e-10	3.36796e-09	immunologic_out.txt	Osteosarcoma
GSE21670_TGFB_VS_TGFB_AND_IL6_TREATED_CD4_TCELL_DN	GSE21670_TGFB_VS_TGFB_AND_IL6_TREATED_CD4_TCELL_DN	54	54	2.9524e-10	4.42985e-10	immunologic_out.txt	Osteosarcoma
GSE2128_CTRL_VS_MIMETOPE_NEGATIVE_SELECTION_DP_THYMOCYTE_NOD_DN	GSE2128_CTRL_VS_MIMETOPE_NEGATIVE_SELECTION_DP_THYMOCYTE_NOD_DN	54	54	3.6289e-10	5.32426e-10	immunologic_out.txt	Osteosarcoma
GSE12845_IGD_POS_BLOOD_VS_NAIVE_TONSIL_BCELL_UP	GSE12845_IGD_POS_BLOOD_VS_NAIVE_TONSIL_BCELL_UP	54	54	6.0241e-10	6.45022e-10	immunologic_out.txt	Osteosarcoma
GSE28726_NAIVE_CD4_TCELL_VS_NAIVE_VA24NEG_NKTCELL_UP	GSE28726_NAIVE_CD4_TCELL_VS_NAIVE_VA24NEG_NKTCELL_UP	54	54	9.2844e-10	1.92897e-09	immunologic_out.txt	Osteosarcoma
GSE3039_B2_VS_B1_BCELL_DN	GSE3039_B2_VS_B1_BCELL_DN	54	54	1.2117e-09	2.70071e-09	immunologic_out.txt	Osteosarcoma
GSE8921_UNSTIM_VS_TLR1_2_STIM_MONOCYTE_6H_UP	GSE8921_UNSTIM_VS_TLR1_2_STIM_MONOCYTE_6H_UP	54	54	1.9987e-09	2.32217e-08	immunologic_out.txt	Osteosarcoma
GSE25123_CTRL_VS_IL4_AND_ROSIGLITAZONE_STIM_MACROPHAGE_UP	GSE25123_CTRL_VS_IL4_AND_ROSIGLITAZONE_STIM_MACROPHAGE_UP	54	54	2.6501e-09	4.72417e-09	immunologic_out.txt	Osteosarcoma
GSE16450_CTRL_VS_IFNA_6H_STIM_MATURE_NEURON_CELL_LINE_DN	GSE16450_CTRL_VS_IFNA_6H_STIM_MATURE_NEURON_CELL_LINE_DN	54	54	3.1774e-09	3.80083e-09	immunologic_out.txt	Osteosarcoma
GSE26156_DOUBLE_POSITIVE_VS_CD4_SINGLE_POSITIVE_THYMOCYTE_DN	GSE26156_DOUBLE_POSITIVE_VS_CD4_SINGLE_POSITIVE_THYMOCYTE_DN	54	54	4.5002e-09	8.24699e-09	immunologic_out.txt	Osteosarcoma
GSE9006_HEALTHY_VS_TYPE_2_DIABETES_PBMC_AT_DX_UP	GSE9006_HEALTHY_VS_TYPE_2_DIABETES_PBMC_AT_DX_UP	54	54	5.9559e-09	7.07497e-08	immunologic_out.txt	Osteosarcoma
GSE43863_TFH_VS_LY6C_LOW_CXCR5NEG_EFFECTOR_CD4_TCELL_UP	GSE43863_TFH_VS_LY6C_LOW_CXCR5NEG_EFFECTOR_CD4_TCELL_UP	54	54	1.116e-08	5.22312e-08	immunologic_out.txt	Osteosarcoma
GSE19401_NAIVE_VS_IMMUNIZED_MOUSE_PLN_FOLLICULAR_DC_DN	GSE19401_NAIVE_VS_IMMUNIZED_MOUSE_PLN_FOLLICULAR_DC_DN	54	54	1.4834e-08	2.0461e-08	immunologic_out.txt	Osteosarcoma
GSE21670_STAT3_KO_VS_WT_CD4_TCELL_DN	GSE21670_STAT3_KO_VS_WT_CD4_TCELL_DN	54	54	1.5683e-08	2.34515e-08	immunologic_out.txt	Osteosarcoma
GSE43955_1H_VS_42H_ACT_CD4_TCELL_WITH_TGFB_IL6_UP	GSE43955_1H_VS_42H_ACT_CD4_TCELL_WITH_TGFB_IL6_UP	54	54	2.2329e-08	1.07349e-07	immunologic_out.txt	Osteosarcoma
GSE20500_CTRL_VS_RETINOIC_ACID_TREATED_CD4_TCELL_UP	GSE20500_CTRL_VS_RETINOIC_ACID_TREATED_CD4_TCELL_UP	54	54	2.4658e-08	3.52885e-08	immunologic_out.txt	Osteosarcoma
GSE1791_CTRL_VS_NEUROMEDINU_IN_T_CELL_LINE_0.8H_UP	GSE1791_CTRL_VS_NEUROMEDINU_IN_T_CELL_LINE_0.8H_UP	54	54	7.0874e-08	9.33127e-08	immunologic_out.txt	Osteosarcoma
GSE22886_UNSTIM_VS_IL2_STIM_NKCELL_DN	GSE22886_UNSTIM_VS_IL2_STIM_NKCELL_DN	54	54	1.4127e-07	2.30363e-07	immunologic_out.txt	Osteosarcoma
GSE37301_MULTIPOTENT_PROGENITOR_VS_RAG2_KO_NK_CELL_DN	GSE37301_MULTIPOTENT_PROGENITOR_VS_RAG2_KO_NK_CELL_DN	54	54	1.7231e-07	5.02421e-07	immunologic_out.txt	Osteosarcoma
GSE45365_HEALTHY_VS_MCMV_INFECTION_CD8A_DC_UP	GSE45365_HEALTHY_VS_MCMV_INFECTION_CD8A_DC_UP	54	54	2.9407e-07	1.50384e-06	immunologic_out.txt	Osteosarcoma
GSE45365_WT_VS_IFNAR_KO_CD8A_DC_MCMV_INFECTION_UP	GSE45365_WT_VS_IFNAR_KO_CD8A_DC_MCMV_INFECTION_UP	54	54	9.2075e-07	4.84422e-06	immunologic_out.txt	Osteosarcoma
GSE360_CTRL_VS_M_TUBERCULOSIS_DC_UP	GSE360_CTRL_VS_M_TUBERCULOSIS_DC_UP	54	54	1.0011e-06	2.58219e-06	immunologic_out.txt	Osteosarcoma
GSE360_LOW_DOSE_B_MALAYI_VS_M_TUBERCULOSIS_DC_UP	GSE360_LOW_DOSE_B_MALAYI_VS_M_TUBERCULOSIS_DC_UP	54	54	2.0677e-06	5.41239e-06	immunologic_out.txt	Osteosarcoma
GSE25087_FETAL_VS_ADULT_TCONV_UP	GSE25087_FETAL_VS_ADULT_TCONV_UP	54	54	2.1311e-06	3.75351e-06	immunologic_out.txt	Osteosarcoma
GSE14308_TH2_VS_TH17_DN	GSE14308_TH2_VS_TH17_DN	54	54	2.239e-06	2.49889e-06	immunologic_out.txt	Osteosarcoma
KAECH_DAY8_EFF_VS_MEMORY_CD8_TCELL_DN	KAECH_DAY8_EFF_VS_MEMORY_CD8_TCELL_DN	54	54	2.2855e-06	4.76716e-05	immunologic_out.txt	Osteosarcoma
GSE9650_EFFECTOR_VS_MEMORY_CD8_TCELL_DN	GSE9650_EFFECTOR_VS_MEMORY_CD8_TCELL_DN	54	54	2.6017e-06	3.43736e-05	immunologic_out.txt	Osteosarcoma
GSE42021_CD24HI_TREG_VS_CD24HI_TCONV_THYMUS_UP	GSE42021_CD24HI_TREG_VS_CD24HI_TCONV_THYMUS_UP	54	54	5.5362e-06	2.40416e-05	immunologic_out.txt	Osteosarcoma
GSE360_T_GONDII_VS_B_MALAYI_LOW_DOSE_MAC_DN	GSE360_T_GONDII_VS_B_MALAYI_LOW_DOSE_MAC_DN	54	54	1.1456e-05	3.0669e-05	immunologic_out.txt	Osteosarcoma
GSE3982_MAST_CELL_VS_MAC_UP	GSE3982_MAST_CELL_VS_MAC_UP	54	54	3.6592e-05	0.000128557	immunologic_out.txt	Osteosarcoma
GSE6875_TCONV_VS_FOXP3_KO_TREG_DN	GSE6875_TCONV_VS_FOXP3_KO_TREG_DN	54	54	6.6166e-05	0.000530329	immunologic_out.txt	Osteosarcoma
GSE3982_EFF_MEMORY_CD4_TCELL_VS_TH2_DN	GSE3982_EFF_MEMORY_CD4_TCELL_VS_TH2_DN	54	54	0.00017815	0.000603864	immunologic_out.txt	Osteosarcoma
GSE9650_NAIVE_VS_EFF_CD8_TCELL_UP	GSE9650_NAIVE_VS_EFF_CD8_TCELL_UP	54	54	0.00045024	0.00605424	immunologic_out.txt	Osteosarcoma
KAECH_NAIVE_VS_DAY8_EFF_CD8_TCELL_UP	KAECH_NAIVE_VS_DAY8_EFF_CD8_TCELL_UP	54	54	0.00064975	0.0138248	immunologic_out.txt	Osteosarcoma
GSE2706_UNSTIM_VS_2H_R848_DC_UP	GSE2706_UNSTIM_VS_2H_R848_DC_UP	10	10	0.017955	0.0339492	immunologic_out.txt	Osteosarcoma
P53_DN.V2_UP	P53_DN.V2_UP	54	54	6.0807e-14	1.58098e-13	oncogenic_out.txt	Osteosarcoma
TMED3	TMED3	23	27	1.9527e-26	8.30521e-25	computational_out.txt	Tcell
TMEM248	TMEM248	23	27	1.9527e-26	8.30521e-25	computational_out.txt	Tcell
PTTG2	PTTG2	11	11	1.1891e-08	8.42912e-08	computational_out.txt	Tcell
SLBP	SLBP	11	11	6.4604e-08	7.97181e-07	computational_out.txt	Tcell
MYCN	MYCN	11	11	7.614e-07	3.00205e-06	computational_out.txt	Tcell
SMG7	SMG7	11	11	2.3415e-06	5.44263e-05	computational_out.txt	Tcell
SUGP2	SUGP2	11	11	2.3415e-06	5.44263e-05	computational_out.txt	Tcell
TIMP4	TIMP4	11	11	3.784e-06	0.000154372	computational_out.txt	Tcell
TMEM161A	TMEM161A	11	11	3.784e-06	0.000154372	computational_out.txt	Tcell
SP140L	SP140L	11	11	1.1899e-05	0.000242715	computational_out.txt	Tcell
SSBP4	SSBP4	11	11	1.1899e-05	0.000242715	computational_out.txt	Tcell
GNF2_BUB3	GNF2_BUB3	11	11	1.5552e-05	2.06568e-05	computational_out.txt	Tcell
RCSD1	RCSD1	11	11	1.6961e-05	0.000134544	computational_out.txt	Tcell
SUSD4	SUSD4	11	11	7.0376e-05	0.00169496	computational_out.txt	Tcell
MODULE_458	MODULE_458	11	11	0.00033246	0.000802642	computational_out.txt	Tcell
SNRPB2	SNRPB2	11	11	0.00035972	0.00566205	computational_out.txt	Tcell
GAVISH_3CA_METAPROGRAM_CD8_T_CELLS_NAIVE_3	GAVISH_3CA_METAPROGRAM_CD8_T_CELLS_NAIVE_3	9	9	0.00044827	0.000532754	computational_out.txt	Tcell
MODULE_280	MODULE_280	16	16	0.00079098	0.00164022	computational_out.txt	Tcell
IRF8	IRF8	11	11	0.00079199	0.0012615	computational_out.txt	Tcell
RPSA	RPSA	9	9	0.00096294	0.00912283	computational_out.txt	Tcell
TCTN1	TCTN1	11	11	0.0013078	0.0353283	computational_out.txt	Tcell
MODULE_127	MODULE_127	9	9	0.0019209	0.0034908	computational_out.txt	Tcell
PRRX2	PRRX2	9	9	0.0023511	0.0151121	computational_out.txt	Tcell
MYT1	MYT1	9	9	0.0031627	0.0126445	computational_out.txt	Tcell
GAVISH_3CA_METAPROGRAM_CD4_T_CELLS_NAIVE_2	GAVISH_3CA_METAPROGRAM_CD4_T_CELLS_NAIVE_2	9	9	0.003568	0.00420792	computational_out.txt	Tcell
GAVISH_3CA_METAPROGRAM_CD8_T_CELLS_NAIVE_2	GAVISH_3CA_METAPROGRAM_CD8_T_CELLS_NAIVE_2	9	9	0.0044275	0.00525881	computational_out.txt	Tcell
PSMD12	PSMD12	9	9	0.0049853	0.0333298	computational_out.txt	Tcell
HALLMARK_P53_PATHWAY	HALLMARK_P53_PATHWAY	22	28	0.001025	0.00351429	hallmark_out.txt	Tcell
HALLMARK_DNA_REPAIR	HALLMARK_DNA_REPAIR	11	11	0.0072035	0.00886585	hallmark_out.txt	Tcell
GSE41867_DAY15_EFFECTOR_VS_DAY30_MEMORY_CD8_TCELL_LCMV_ARMSTRONG_UP	GSE41867_DAY15_EFFECTOR_VS_DAY30_MEMORY_CD8_TCELL_LCMV_ARMSTRONG_UP	26	33	6.0435e-12	2.49124e-11	immunologic_out.txt	Tcell
GSE11057_CD4_CENT_MEM_VS_PBMC_UP	GSE11057_CD4_CENT_MEM_VS_PBMC_UP	23	29	2.6645e-10	2.75931e-10	immunologic_out.txt	Tcell
GSE11961_MARGINAL_ZONE_BCELL_VS_PLASMA_CELL_DAY7_UP	GSE11961_MARGINAL_ZONE_BCELL_VS_PLASMA_CELL_DAY7_UP	21	26	6.1462e-10	6.47631e-10	immunologic_out.txt	Tcell
GSE17721_POLYIC_VS_PAM3CSK4_2H_BMDC_UP	GSE17721_POLYIC_VS_PAM3CSK4_2H_BMDC_UP	19	23	2.1149e-09	2.77774e-09	immunologic_out.txt	Tcell
GSE29618_PRE_VS_DAY7_FLU_VACCINE_MONOCYTE_UP	GSE29618_PRE_VS_DAY7_FLU_VACCINE_MONOCYTE_UP	22	24	2.3879e-09	5.18602e-09	immunologic_out.txt	Tcell
GSE35435_RESTING_VS_IL4_TREATED_MACROPHAGE_UP	GSE35435_RESTING_VS_IL4_TREATED_MACROPHAGE_UP	26	33	4.1907e-08	1.04659e-07	immunologic_out.txt	Tcell
GSE14000_UNSTIM_VS_16H_LPS_DC_TRANSLATED_RNA_UP	GSE14000_UNSTIM_VS_16H_LPS_DC_TRANSLATED_RNA_UP	16	16	1.17e-07	1.29655e-07	immunologic_out.txt	Tcell
GSE10239_NAIVE_VS_MEMORY_CD8_TCELL_UP	GSE10239_NAIVE_VS_MEMORY_CD8_TCELL_UP	25	25	1.2207e-07	1.25287e-07	immunologic_out.txt	Tcell
GSE25123_ROSIGLITAZONE_VS_IL4_AND_ROSIGLITAZONE_STIM_PPARG_KO_MACROPHAGE_DAY10_UP	GSE25123_ROSIGLITAZONE_VS_IL4_AND_ROSIGLITAZONE_STIM_PPARG_KO_MACROPHAGE_DAY10_UP	25	25	3.541e-07	6.35174e-07	immunologic_out.txt	Tcell
GSE33162_HDAC3_KO_VS_HDAC3_KO_4H_LPS_STIM_MACROPHAGE_UP	GSE33162_HDAC3_KO_VS_HDAC3_KO_4H_LPS_STIM_MACROPHAGE_UP	17	17	3.8552e-07	9.16973e-07	immunologic_out.txt	Tcell
GSE12003_4D_VS_8D_CULTURE_BM_PROGENITOR_DN	GSE12003_4D_VS_8D_CULTURE_BM_PROGENITOR_DN	17	17	4.3368e-07	4.5889e-07	immunologic_out.txt	Tcell
GSE7768_OVA_ALONE_VS_OVA_WITH_LPS_IMMUNIZED_MOUSE_WHOLE_SPLEEN_6H_UP	GSE7768_OVA_ALONE_VS_OVA_WITH_LPS_IMMUNIZED_MOUSE_WHOLE_SPLEEN_6H_UP	17	17	4.3393e-07	4.14149e-06	immunologic_out.txt	Tcell
GSE46468_LUNG_INNATE_LYMPHOID_CELL_VS_SPLEEN_CD4_TCELL_DN	GSE46468_LUNG_INNATE_LYMPHOID_CELL_VS_SPLEEN_CD4_TCELL_DN	19	23	6.4627e-07	3.54378e-06	immunologic_out.txt	Tcell
GSE26928_NAIVE_VS_CXCR5_POS_CD4_TCELL_DN	GSE26928_NAIVE_VS_CXCR5_POS_CD4_TCELL_DN	21	23	1.3342e-06	2.49903e-06	immunologic_out.txt	Tcell
GSE7509_DC_VS_MONOCYTE_WITH_FCGRIIB_STIM_UP	GSE7509_DC_VS_MONOCYTE_WITH_FCGRIIB_STIM_UP	21	22	2.407e-06	2.15734e-05	immunologic_out.txt	Tcell
GSE18791_UNSTIM_VS_NEWCATSLE_VIRUS_DC_10H_UP	GSE18791_UNSTIM_VS_NEWCATSLE_VIRUS_DC_10H_UP	16	16	2.4221e-06	3.2855e-06	immunologic_out.txt	Tcell
GSE27786_LIN_NEG_VS_NEUTROPHIL_DN	GSE27786_LIN_NEG_VS_NEUTROPHIL_DN	16	16	2.9855e-06	6.01758e-06	immunologic_out.txt	Tcell
GSE27786_LIN_NEG_VS_NKTCELL_DN	GSE27786_LIN_NEG_VS_NKTCELL_DN	16	16	4.6896e-06	9.46677e-06	immunologic_out.txt	Tcell
GSE12505_WT_VS_E2_2_HET_PDC_DN	GSE12505_WT_VS_E2_2_HET_PDC_DN	16	16	6.5309e-06	6.96901e-06	immunologic_out.txt	Tcell
GSE12366_GC_BCELL_VS_PLASMA_CELL_UP	GSE12366_GC_BCELL_VS_PLASMA_CELL_UP	14	17	8.7927e-06	9.33552e-06	immunologic_out.txt	Tcell
GSE31082_DN_VS_CD4_SP_THYMOCYTE_DN	GSE31082_DN_VS_CD4_SP_THYMOCYTE_DN	21	22	2.3774e-05	5.4094e-05	immunologic_out.txt	Tcell
GSE6092_UNSTIM_VS_IFNG_STIM_ENDOTHELIAL_CELL_DN	GSE6092_UNSTIM_VS_IFNG_STIM_ENDOTHELIAL_CELL_DN	17	17	2.5906e-05	0.000184938	immunologic_out.txt	Tcell
GSE339_CD8POS_VS_CD4CD8DN_DC_DN	GSE339_CD8POS_VS_CD4CD8DN_DC_DN	25	25	2.7586e-05	6.69675e-05	immunologic_out.txt	Tcell
GSE17186_NAIVE_VS_CD21LOW_TRANSITIONAL_BCELL_UP	GSE17186_NAIVE_VS_CD21LOW_TRANSITIONAL_BCELL_UP	25	25	4.6292e-05	5.59965e-05	immunologic_out.txt	Tcell
GSE5589_IL6_KO_VS_IL10_KO_LPS_AND_IL10_STIM_MACROPHAGE_45MIN_UP	GSE5589_IL6_KO_VS_IL10_KO_LPS_AND_IL10_STIM_MACROPHAGE_45MIN_UP	25	25	6.3773e-05	0.000408471	immunologic_out.txt	Tcell
GSE2405_0H_VS_9H_A_PHAGOCYTOPHILUM_STIM_NEUTROPHIL_UP	GSE2405_0H_VS_9H_A_PHAGOCYTOPHILUM_STIM_NEUTROPHIL_UP	16	16	7.0698e-05	0.000119378	immunologic_out.txt	Tcell
GSE7219_UNSTIM_VS_LPS_AND_ANTI_CD40_STIM_NIK_NFKB2_KO_DC_UP	GSE7219_UNSTIM_VS_LPS_AND_ANTI_CD40_STIM_NIK_NFKB2_KO_DC_UP	17	17	7.9612e-05	0.000653806	immunologic_out.txt	Tcell
GSE45365_WT_VS_IFNAR_KO_CD8A_DC_MCMV_INFECTION_UP	GSE45365_WT_VS_IFNAR_KO_CD8A_DC_MCMV_INFECTION_UP	22	28	8.0591e-05	0.000424344	immunologic_out.txt	Tcell
GSE37301_LYMPHOID_PRIMED_MPP_VS_RAG2_KO_NK_CELL_UP	GSE37301_LYMPHOID_PRIMED_MPP_VS_RAG2_KO_NK_CELL_UP	25	25	8.0762e-05	0.000234152	immunologic_out.txt	Tcell
GSE17974_IL4_AND_ANTI_IL12_VS_UNTREATED_2H_ACT_CD4_TCELL_UP	GSE17974_IL4_AND_ANTI_IL12_VS_UNTREATED_2H_ACT_CD4_TCELL_UP	20	21	8.1009e-05	0.000108387	immunologic_out.txt	Tcell
GSE40274_FOXP3_VS_FOXP3_AND_SATB1_TRANSDUCED_ACTIVATED_CD4_TCELL_DN	GSE40274_FOXP3_VS_FOXP3_AND_SATB1_TRANSDUCED_ACTIVATED_CD4_TCELL_DN	16	16	8.6315e-05	0.000325185	immunologic_out.txt	Tcell
GSE45365_CD8A_DC_VS_CD11B_DC_IFNAR_KO_DN	GSE45365_CD8A_DC_VS_CD11B_DC_IFNAR_KO_DN	17	17	0.0001147	0.000578084	immunologic_out.txt	Tcell
NAKAYA_PBMC_FLUMIST_AGE_18_50YO_7DY_IFN_SUBSET_UP	NAKAYA_PBMC_FLUMIST_AGE_18_50YO_7DY_IFN_SUBSET_UP	11	11	0.000116	0.00365745	immunologic_out.txt	Tcell
GSE5503_PLN_DC_VS_SPLEEN_DC_ACTIVATED_ALLOGENIC_TCELL_DN	GSE5503_PLN_DC_VS_SPLEEN_DC_ACTIVATED_ALLOGENIC_TCELL_DN	16	16	0.0001186	0.000728798	immunologic_out.txt	Tcell
GSE36826_NORMAL_VS_STAPH_AUREUS_INF_IL1R_KO_SKIN_DN	GSE36826_NORMAL_VS_STAPH_AUREUS_INF_IL1R_KO_SKIN_DN	25	26	0.00011924	0.000326584	immunologic_out.txt	Tcell
GSE17974_CTRL_VS_ACT_IL4_AND_ANTI_IL12_12H_CD4_TCELL_DN	GSE17974_CTRL_VS_ACT_IL4_AND_ANTI_IL12_12H_CD4_TCELL_DN	16	16	0.00016232	0.000215816	immunologic_out.txt	Tcell
GSE32423_MEMORY_VS_NAIVE_CD8_TCELL_IL7_UP	GSE32423_MEMORY_VS_NAIVE_CD8_TCELL_IL7_UP	17	17	0.00016373	0.000382061	immunologic_out.txt	Tcell
GSE41867_NAIVE_VS_EFFECTOR_CD8_TCELL_DN	GSE41867_NAIVE_VS_EFFECTOR_CD8_TCELL_DN	16	16	0.00017377	0.000744708	immunologic_out.txt	Tcell
GSE24210_RESTING_TREG_VS_TCONV_UP	GSE24210_RESTING_TREG_VS_TCONV_UP	16	16	0.00019219	0.000329566	immunologic_out.txt	Tcell
GSE3920_IFNA_VS_IFNG_TREATED_FIBROBLAST_UP	GSE3920_IFNA_VS_IFNG_TREATED_FIBROBLAST_UP	17	17	0.00020062	0.000635957	immunologic_out.txt	Tcell
GSE17721_CTRL_VS_PAM3CSK4_0.5H_BMDC_DN	GSE17721_CTRL_VS_PAM3CSK4_0.5H_BMDC_DN	17	17	0.00020256	0.000254256	immunologic_out.txt	Tcell
GSE41867_LCMV_ARMSTRONG_VS_CLONE13_DAY8_EFFECTOR_CD8_TCELL_DN	GSE41867_LCMV_ARMSTRONG_VS_CLONE13_DAY8_EFFECTOR_CD8_TCELL_DN	17	17	0.00020922	0.000879554	immunologic_out.txt	Tcell
GSE7852_LN_VS_FAT_TCONV_UP	GSE7852_LN_VS_FAT_TCONV_UP	9	9	0.00024046	0.00238971	immunologic_out.txt	Tcell
GSE339_EX_VIVO_VS_IN_CULTURE_CD8POS_DC_DN	GSE339_EX_VIVO_VS_IN_CULTURE_CD8POS_DC_DN	25	25	0.00024613	0.000599701	immunologic_out.txt	Tcell
GSE33292_DN3_THYMOCYTE_VS_TCELL_LYMPHOMA_FROM_TCF1_KO_UP	GSE33292_DN3_THYMOCYTE_VS_TCELL_LYMPHOMA_FROM_TCF1_KO_UP	17	17	0.00027372	0.0006534	immunologic_out.txt	Tcell
KAECH_DAY15_EFF_VS_MEMORY_CD8_TCELL_DN	KAECH_DAY15_EFF_VS_MEMORY_CD8_TCELL_DN	18	20	0.00028196	0.00581145	immunologic_out.txt	Tcell
GSE2770_TGFB_AND_IL4_VS_IL4_TREATED_ACT_CD4_TCELL_6H_DN	GSE2770_TGFB_AND_IL4_VS_IL4_TREATED_ACT_CD4_TCELL_6H_DN	17	17	0.00028644	0.000558642	immunologic_out.txt	Tcell
GSE14026_TH1_VS_TH17_UP	GSE14026_TH1_VS_TH17_UP	16	16	0.00030456	0.000337996	immunologic_out.txt	Tcell
GSE7568_CTRL_VS_3H_TGFB_TREATED_MACROPHAGES_WITH_IL4_AND_DEXAMETHASONE_DN	GSE7568_CTRL_VS_3H_TGFB_TREATED_MACROPHAGES_WITH_IL4_AND_DEXAMETHASONE_DN	17	17	0.00032056	0.00296854	immunologic_out.txt	Tcell
GSE17721_POLYIC_VS_CPG_2H_BMDC_UP	GSE17721_POLYIC_VS_CPG_2H_BMDC_UP	17	17	0.00032845	0.000427574	immunologic_out.txt	Tcell
ERWIN_COHEN_BLOOD_LIVE_VACCINE_TC_83_AGE_23_48YO_VACCINATED_VS_CONTROL_14DY_UP	ERWIN_COHEN_BLOOD_LIVE_VACCINE_TC_83_AGE_23_48YO_VACCINATED_VS_CONTROL_14DY_UP	17	17	0.00033827	0.000340649	immunologic_out.txt	Tcell
GSE22601_IMMATURE_CD4_SINGLE_POSITIVE_VS_CD4_SINGLE_POSITIVE_THYMOCYTE_DN	GSE22601_IMMATURE_CD4_SINGLE_POSITIVE_VS_CD4_SINGLE_POSITIVE_THYMOCYTE_DN	16	16	0.00037263	0.000586051	immunologic_out.txt	Tcell
GSE40655_FOXO1_KO_VS_WT_NTREG_UP	GSE40655_FOXO1_KO_VS_WT_NTREG_UP	16	16	0.00038811	0.00149297	immunologic_out.txt	Tcell
GSE17580_TREG_VS_TEFF_S_MANSONI_INF_DN	GSE17580_TREG_VS_TEFF_S_MANSONI_INF_DN	17	17	0.00041201	0.00050159	immunologic_out.txt	Tcell
GSE17301_CTRL_VS_48H_IFNA2_STIM_CD8_TCELL_UP	GSE17301_CTRL_VS_48H_IFNA2_STIM_CD8_TCELL_UP	21	22	0.00041805	0.000507078	immunologic_out.txt	Tcell
GSE339_CD4POS_VS_CD8POS_DC_UP	GSE339_CD4POS_VS_CD8POS_DC_UP	25	25	0.00043393	0.00105292	immunologic_out.txt	Tcell
GSE12839_CTRL_VS_IL12_TREATED_PBMC_UP	GSE12839_CTRL_VS_IL12_TREATED_PBMC_UP	17	17	0.00043475	0.000464569	immunologic_out.txt	Tcell
GSE25088_CTRL_VS_ROSIGLITAZONE_STIM_STAT6_KO_MACROPHAGE_DN	GSE25088_CTRL_VS_ROSIGLITAZONE_STIM_STAT6_KO_MACROPHAGE_DN	16	16	0.00045235	0.000801371	immunologic_out.txt	Tcell
GSE36476_YOUNG_VS_OLD_DONOR_MEMORY_CD4_TCELL_40H_TSST_ACT_DN	GSE36476_YOUNG_VS_OLD_DONOR_MEMORY_CD4_TCELL_40H_TSST_ACT_DN	21	22	0.00049985	0.00136059	immunologic_out.txt	Tcell
GSE45365_HEALTHY_VS_MCMV_INFECTION_CD8A_DC_IFNAR_KO_DN	GSE45365_HEALTHY_VS_MCMV_INFECTION_CD8A_DC_IFNAR_KO_DN	25	26	0.00050856	0.00259773	immunologic_out.txt	Tcell
GSE4748_LPS_VS_LPS_AND_CYANOBACTERIUM_LPSLIKE_STIM_DC_3H_UP	GSE4748_LPS_VS_LPS_AND_CYANOBACTERIUM_LPSLIKE_STIM_DC_3H_UP	17	17	0.00062247	0.00361935	immunologic_out.txt	Tcell
NAKAYA_PBMC_FLUARIX_FLUVIRIN_AGE_18_50YO_7DY_UP	NAKAYA_PBMC_FLUARIX_FLUVIRIN_AGE_18_50YO_7DY_UP	17	17	0.00064413	0.0191683	immunologic_out.txt	Tcell
GSE22103_UNSTIM_VS_LPS_STIM_NEUTROPHIL_UP	GSE22103_UNSTIM_VS_LPS_STIM_NEUTROPHIL_UP	16	16	0.00065797	0.00101286	immunologic_out.txt	Tcell
GSE360_L_MAJOR_VS_B_MALAYI_HIGH_DOSE_MAC_DN	GSE360_L_MAJOR_VS_B_MALAYI_HIGH_DOSE_MAC_DN	16	16	0.00078203	0.00207328	immunologic_out.txt	Tcell
GSE22886_IGG_IGA_MEMORY_BCELL_VS_BM_PLASMA_CELL_DN	GSE22886_IGG_IGA_MEMORY_BCELL_VS_BM_PLASMA_CELL_DN	17	17	0.00083306	0.00132913	immunologic_out.txt	Tcell
GSE13493_DP_VS_CD8POS_THYMOCYTE_UP	GSE13493_DP_VS_CD8POS_THYMOCYTE_UP	17	17	0.00089901	0.000981665	immunologic_out.txt	Tcell
GSE411_UNSTIM_VS_100MIN_IL6_STIM_SOCS3_KO_MACROPHAGE_UP	GSE411_UNSTIM_VS_100MIN_IL6_STIM_SOCS3_KO_MACROPHAGE_UP	16	16	0.0010286	0.00415598	immunologic_out.txt	Tcell
GSE13522_CTRL_VS_T_CRUZI_Y_STRAIN_INF_SKIN_IFNG_KO_UP	GSE13522_CTRL_VS_T_CRUZI_Y_STRAIN_INF_SKIN_IFNG_KO_UP	17	17	0.0010339	0.00113176	immunologic_out.txt	Tcell
GSE2405_0H_VS_6H_A_PHAGOCYTOPHILUM_STIM_NEUTROPHIL_UP	GSE2405_0H_VS_6H_A_PHAGOCYTOPHILUM_STIM_NEUTROPHIL_UP	16	16	0.0011014	0.00185859	immunologic_out.txt	Tcell
GSE21927_SPLEEN_VS_BONE_MARROW_MONOCYTE_BALBC_DN	GSE21927_SPLEEN_VS_BONE_MARROW_MONOCYTE_BALBC_DN	17	17	0.0011436	0.00173771	immunologic_out.txt	Tcell
GSE3691_CONVENTIONAL_VS_PLASMACYTOID_DC_SPLEEN_UP	GSE3691_CONVENTIONAL_VS_PLASMACYTOID_DC_SPLEEN_UP	17	17	0.0012271	0.00341923	immunologic_out.txt	Tcell
GSE25088_WT_VS_STAT6_KO_MACROPHAGE_ROSIGLITAZONE_STIM_UP	GSE25088_WT_VS_STAT6_KO_MACROPHAGE_ROSIGLITAZONE_STIM_UP	17	17	0.0013626	0.00242693	immunologic_out.txt	Tcell
GSE8621_UNSTIM_VS_LPS_STIM_MACROPHAGE_DN	GSE8621_UNSTIM_VS_LPS_STIM_MACROPHAGE_DN	16	16	0.0013651	0.0145199	immunologic_out.txt	Tcell
GSE41867_DAY6_VS_DAY8_LCMV_CLONE13_EFFECTOR_CD8_TCELL_DN	GSE41867_DAY6_VS_DAY8_LCMV_CLONE13_EFFECTOR_CD8_TCELL_DN	17	17	0.0015526	0.00645535	immunologic_out.txt	Tcell
GSE2770_IL12_AND_TGFB_ACT_VS_ACT_CD4_TCELL_2H_UP	GSE2770_IL12_AND_TGFB_ACT_VS_ACT_CD4_TCELL_2H_UP	21	22	0.0016907	0.00324362	immunologic_out.txt	Tcell
GSE37301_LYMPHOID_PRIMED_MPP_VS_GRAN_MONO_PROGENITOR_UP	GSE37301_LYMPHOID_PRIMED_MPP_VS_GRAN_MONO_PROGENITOR_UP	25	25	0.0020785	0.00601301	immunologic_out.txt	Tcell
GSE14308_TH1_VS_NAIVE_CD4_TCELL_DN	GSE14308_TH1_VS_NAIVE_CD4_TCELL_DN	15	15	0.0021631	0.00240814	immunologic_out.txt	Tcell
GSE24026_PD1_LIGATION_VS_CTRL_IN_ACT_TCELL_LINE_UP	GSE24026_PD1_LIGATION_VS_CTRL_IN_ACT_TCELL_LINE_UP	17	17	0.0022453	0.00377687	immunologic_out.txt	Tcell
GSE2770_UNTREATED_VS_ACT_CD4_TCELL_2H_UP	GSE2770_UNTREATED_VS_ACT_CD4_TCELL_2H_UP	16	16	0.0024359	0.00476652	immunologic_out.txt	Tcell
GSE26928_NAIVE_VS_EFF_MEMORY_CD4_TCELL_DN	GSE26928_NAIVE_VS_EFF_MEMORY_CD4_TCELL_DN	17	17	0.0025841	0.00484359	immunologic_out.txt	Tcell
GSE2770_IL4_ACT_VS_ACT_CD4_TCELL_48H_DN	GSE2770_IL4_ACT_VS_ACT_CD4_TCELL_48H_DN	16	16	0.0028993	0.00561316	immunologic_out.txt	Tcell
GSE29618_PRE_VS_DAY7_POST_TIV_FLU_VACCINE_MONOCYTE_UP	GSE29618_PRE_VS_DAY7_POST_TIV_FLU_VACCINE_MONOCYTE_UP	17	18	0.0029297	0.00640471	immunologic_out.txt	Tcell
GSE8921_UNSTIM_VS_TLR1_2_STIM_MONOCYTE_6H_UP	GSE8921_UNSTIM_VS_TLR1_2_STIM_MONOCYTE_6H_UP	18	20	0.0033085	0.0385168	immunologic_out.txt	Tcell
GSE27786_BCELL_VS_CD8_TCELL_UP	GSE27786_BCELL_VS_CD8_TCELL_UP	16	16	0.003623	0.00717422	immunologic_out.txt	Tcell
GSE11973_MIR223_KOVS_WT_BONE_MARROW_NEUTROPHIL_UP	GSE11973_MIR223_KOVS_WT_BONE_MARROW_NEUTROPHIL_UP	17	17	0.0041731	0.00441304	immunologic_out.txt	Tcell
GSE22886_IL2_VS_IL15_STIM_NKCELL_DN	GSE22886_IL2_VS_IL15_STIM_NKCELL_DN	17	17	0.0041797	0.00668071	immunologic_out.txt	Tcell
GSE6259_BCELL_VS_CD4_TCELL_UP	GSE6259_BCELL_VS_CD4_TCELL_UP	11	11	0.004306	0.0312879	immunologic_out.txt	Tcell
GSE20198_IL12_VS_IFNA_TREATED_ACT_CD4_TCELL_UP	GSE20198_IL12_VS_IFNA_TREATED_ACT_CD4_TCELL_UP	11	11	0.0045484	0.00644712	immunologic_out.txt	Tcell
GSE21033_3H_VS_24H_POLYIC_STIM_DC_UP	GSE21033_3H_VS_24H_POLYIC_STIM_DC_UP	9	9	0.0053678	0.00777927	immunologic_out.txt	Tcell
GSE17721_0.5H_VS_12H_CPG_BMDC_UP	GSE17721_0.5H_VS_12H_CPG_BMDC_UP	15	15	0.0054898	0.00669571	immunologic_out.txt	Tcell
GSE2770_IL4_ACT_VS_ACT_CD4_TCELL_2H_DN	GSE2770_IL4_ACT_VS_ACT_CD4_TCELL_2H_DN	21	22	0.0055162	0.0106718	immunologic_out.txt	Tcell
GSE41867_LCMV_ARMSTRONG_VS_CLONE13_DAY8_EFFECTOR_CD8_TCELL_UP	GSE41867_LCMV_ARMSTRONG_VS_CLONE13_DAY8_EFFECTOR_CD8_TCELL_UP	17	17	0.0059468	0.02502	immunologic_out.txt	Tcell
GSE5589_WT_VS_IL6_KO_LPS_STIM_MACROPHAGE_45MIN_DN	GSE5589_WT_VS_IL6_KO_LPS_STIM_MACROPHAGE_45MIN_DN	25	25	0.0068586	0.0473047	immunologic_out.txt	Tcell
GSE1566_WT_VS_EZH2_KO_LN_TCELL_DN	GSE1566_WT_VS_EZH2_KO_LN_TCELL_DN	16	16	0.0069263	0.00807763	immunologic_out.txt	Tcell
GSE34156_NOD2_LIGAND_VS_NOD2_AND_TLR1_TLR2_LIGAND_6H_TREATED_MONOCYTE_DN	GSE34156_NOD2_LIGAND_VS_NOD2_AND_TLR1_TLR2_LIGAND_6H_TREATED_MONOCYTE_DN	17	17	0.00699	0.0171258	immunologic_out.txt	Tcell
GSE10273_HIGH_VS_LOW_IL7_TREATED_IRF4_8_NULL_PRE_BCELL_DN	GSE10273_HIGH_VS_LOW_IL7_TREATED_IRF4_8_NULL_PRE_BCELL_DN	16	16	0.0070626	0.00726984	immunologic_out.txt	Tcell
GSE12484_HEALTHY_VS_PERIDONTITIS_NEUTROPHILS_DN	GSE12484_HEALTHY_VS_PERIDONTITIS_NEUTROPHILS_DN	17	17	0.0071548	0.00763169	immunologic_out.txt	Tcell
GSE24671_CTRL_VS_SENDAI_VIRUS_INFECTED_MOUSE_SPLENOCYTES_DN	GSE24671_CTRL_VS_SENDAI_VIRUS_INFECTED_MOUSE_SPLENOCYTES_DN	16	16	0.0081077	0.0141644	immunologic_out.txt	Tcell
GSE21670_UNTREATED_VS_IL6_TREATED_STAT3_KO_CD4_TCELL_DN	GSE21670_UNTREATED_VS_IL6_TREATED_STAT3_KO_CD4_TCELL_DN	16	17	0.0087718	0.0131851	immunologic_out.txt	Tcell
GSE23308_CTRL_VS_CORTICOSTERONE_TREATED_MACROPHAGE_MINERALCORTICOID_REC_KO_UP	GSE23308_CTRL_VS_CORTICOSTERONE_TREATED_MACROPHAGE_MINERALCORTICOID_REC_KO_UP	17	17	0.0090743	0.0149833	immunologic_out.txt	Tcell
GSE12366_PLASMA_CELL_VS_NAIVE_BCELL_DN	GSE12366_PLASMA_CELL_VS_NAIVE_BCELL_DN	15	15	0.0092723	0.00986252	immunologic_out.txt	Tcell
GSE19198_1H_VS_24H_IL21_TREATED_TCELL_DN	GSE19198_1H_VS_24H_IL21_TREATED_TCELL_DN	16	16	0.010256	0.0140305	immunologic_out.txt	Tcell
GSE17721_POLYIC_VS_PAM3CSK4_0.5H_BMDC_DN	GSE17721_POLYIC_VS_PAM3CSK4_0.5H_BMDC_DN	17	17	0.010334	0.0135359	immunologic_out.txt	Tcell
GSE40274_FOXP3_VS_FOXP3_AND_IRF4_TRANSDUCED_ACTIVATED_CD4_TCELL_UP	GSE40274_FOXP3_VS_FOXP3_AND_IRF4_TRANSDUCED_ACTIVATED_CD4_TCELL_UP	17	17	0.010439	0.0391888	immunologic_out.txt	Tcell
GSE36888_STAT5_AB_KNOCKIN_VS_WT_TCELL_IL2_TREATED_6H_UP	GSE36888_STAT5_AB_KNOCKIN_VS_WT_TCELL_IL2_TREATED_6H_UP	17	17	0.011011	0.0303619	immunologic_out.txt	Tcell
GSE27786_CD8_TCELL_VS_ERYTHROBLAST_UP	GSE27786_CD8_TCELL_VS_ERYTHROBLAST_UP	17	17	0.011449	0.0228764	immunologic_out.txt	Tcell
GSE17301_ACD3_ACD28_VS_ACD3_ACD28_AND_IFNA2_STIM_CD8_TCELL_DN	GSE17301_ACD3_ACD28_VS_ACD3_ACD28_AND_IFNA2_STIM_CD8_TCELL_DN	16	16	0.012174	0.0147295	immunologic_out.txt	Tcell
GSE24026_PD1_LIGATION_VS_CTRL_IN_ACT_TCELL_LINE_DN	GSE24026_PD1_LIGATION_VS_CTRL_IN_ACT_TCELL_LINE_DN	16	16	0.01227	0.0206331	immunologic_out.txt	Tcell
GSE17974_0H_VS_1H_IN_VITRO_ACT_CD4_TCELL_DN	GSE17974_0H_VS_1H_IN_VITRO_ACT_CD4_TCELL_DN	16	16	0.012729	0.0168227	immunologic_out.txt	Tcell
GSE29164_CD8_TCELL_VS_CD8_TCELL_AND_IL12_TREATED_MELANOMA_DAY7_UP	GSE29164_CD8_TCELL_VS_CD8_TCELL_AND_IL12_TREATED_MELANOMA_DAY7_UP	16	16	0.013221	0.0278235	immunologic_out.txt	Tcell
GSE25088_CTRL_VS_ROSIGLITAZONE_STIM_STAT6_KO_MACROPHAGE_UP	GSE25088_CTRL_VS_ROSIGLITAZONE_STIM_STAT6_KO_MACROPHAGE_UP	11	11	0.014266	0.0252817	immunologic_out.txt	Tcell
GSE16450_CTRL_VS_IFNA_12H_STIM_IMMATURE_NEURON_CELL_LINE_UP	GSE16450_CTRL_VS_IFNA_12H_STIM_IMMATURE_NEURON_CELL_LINE_UP	17	17	0.014452	0.0172687	immunologic_out.txt	Tcell
GSE2405_0H_VS_1.5H_A_PHAGOCYTOPHILUM_STIM_NEUTROPHIL_DN	GSE2405_0H_VS_1.5H_A_PHAGOCYTOPHILUM_STIM_NEUTROPHIL_DN	9	9	0.015145	0.0254838	immunologic_out.txt	Tcell
GSE15659_NAIVE_CD4_TCELL_VS_RESTING_TREG_DN	GSE15659_NAIVE_CD4_TCELL_VS_RESTING_TREG_DN	11	11	0.015246	0.0177334	immunologic_out.txt	Tcell
GSE17721_CTRL_VS_CPG_0.5H_BMDC_UP	GSE17721_CTRL_VS_CPG_0.5H_BMDC_UP	25	25	0.015962	0.019815	immunologic_out.txt	Tcell
GSE17974_CTRL_VS_ACT_IL4_AND_ANTI_IL12_2H_CD4_TCELL_DN	GSE17974_CTRL_VS_ACT_IL4_AND_ANTI_IL12_2H_CD4_TCELL_DN	16	16	0.01603	0.0213451	immunologic_out.txt	Tcell
GSE36009_WT_VS_NLRP10_KO_DC_DN	GSE36009_WT_VS_NLRP10_KO_DC_DN	19	22	0.016998	0.0430806	immunologic_out.txt	Tcell
GSE17721_0.5H_VS_4H_LPS_BMDC_UP	GSE17721_0.5H_VS_4H_LPS_BMDC_UP	11	11	0.017366	0.0212984	immunologic_out.txt	Tcell
GSE27786_LSK_VS_NEUTROPHIL_DN	GSE27786_LSK_VS_NEUTROPHIL_DN	16	16	0.017662	0.0358451	immunologic_out.txt	Tcell
GSE20500_CTRL_VS_RARA_ANTAGONIST_TREATED_CD4_TCELL_DN	GSE20500_CTRL_VS_RARA_ANTAGONIST_TREATED_CD4_TCELL_DN	11	11	0.019473	0.0278479	immunologic_out.txt	Tcell
GSE17721_POLYIC_VS_CPG_0.5H_BMDC_UP	GSE17721_POLYIC_VS_CPG_0.5H_BMDC_UP	15	15	0.020637	0.0267993	immunologic_out.txt	Tcell
GSE20198_UNTREATED_VS_IL12_TREATED_ACT_CD4_TCELL_DN	GSE20198_UNTREATED_VS_IL12_TREATED_ACT_CD4_TCELL_DN	16	16	0.020894	0.0296717	immunologic_out.txt	Tcell
GSE21360_NAIVE_VS_QUATERNARY_MEMORY_CD8_TCELL_DN	GSE21360_NAIVE_VS_QUATERNARY_MEMORY_CD8_TCELL_DN	17	17	0.021111	0.0310108	immunologic_out.txt	Tcell
GSE17721_POLYIC_VS_PAM3CSK4_8H_BMDC_UP	GSE17721_POLYIC_VS_PAM3CSK4_8H_BMDC_UP	17	17	0.021377	0.0281187	immunologic_out.txt	Tcell
GSE17974_IL4_AND_ANTI_IL12_VS_UNTREATED_48H_ACT_CD4_TCELL_DN	GSE17974_IL4_AND_ANTI_IL12_VS_UNTREATED_48H_ACT_CD4_TCELL_DN	16	16	0.022515	0.0301319	immunologic_out.txt	Tcell
GSE20198_UNTREATED_VS_IFNA_TREATED_ACT_CD4_TCELL_UP	GSE20198_UNTREATED_VS_IFNA_TREATED_ACT_CD4_TCELL_UP	16	16	0.022555	0.0320048	immunologic_out.txt	Tcell
GSE22282_HYPOXIA_VS_NORMOXIA_MYELOID_DC_UP	GSE22282_HYPOXIA_VS_NORMOXIA_MYELOID_DC_UP	16	16	0.022794	0.0352731	immunologic_out.txt	Tcell
GSE13493_DP_VS_CD4INTCD8POS_THYMOCYTE_UP	GSE13493_DP_VS_CD4INTCD8POS_THYMOCYTE_UP	17	17	0.023462	0.0256085	immunologic_out.txt	Tcell
GSE2706_UNSTIM_VS_2H_R848_DC_UP	GSE2706_UNSTIM_VS_2H_R848_DC_UP	6	6	0.024298	0.0459502	immunologic_out.txt	Tcell
GSE27291_0H_VS_6H_STIM_GAMMADELTA_TCELL_UP	GSE27291_0H_VS_6H_STIM_GAMMADELTA_TCELL_UP	11	11	0.025274	0.0481397	immunologic_out.txt	Tcell
GSE21927_SPLEEN_C57BL6_VS_EL4_TUMOR_BALBC_MONOCYTES_UP	GSE21927_SPLEEN_C57BL6_VS_EL4_TUMOR_BALBC_MONOCYTES_UP	15	15	0.027347	0.0414944	immunologic_out.txt	Tcell
GSE13411_IGM_MEMORY_BCELL_VS_PLASMA_CELL_UP	GSE13411_IGM_MEMORY_BCELL_VS_PLASMA_CELL_UP	9	9	0.028884	0.0311924	immunologic_out.txt	Tcell
GSE2128_C57BL6_VS_NOD_CD4CD8_DP_THYMOCYTE_UP	GSE2128_C57BL6_VS_NOD_CD4CD8_DP_THYMOCYTE_UP	17	17	0.029623	0.0433821	immunologic_out.txt	Tcell
GSE17721_0.5H_VS_4H_POLYIC_BMDC_DN	GSE17721_0.5H_VS_4H_POLYIC_BMDC_DN	17	17	0.029902	0.0366985	immunologic_out.txt	Tcell
GSE10273_LOW_IL7_VS_HIGH_IL7_AND_IRF4_IN_IRF4_8_NULL_PRE_BCELL_DN	GSE10273_LOW_IL7_VS_HIGH_IL7_AND_IRF4_IN_IRF4_8_NULL_PRE_BCELL_DN	16	16	0.033537	0.0345345	immunologic_out.txt	Tcell
E2F1_UP.V1_UP	E2F1_UP.V1_UP	16	16	0.0088723	0.0113916	oncogenic_out.txt	Tcell
AKT_UP_MTOR_DN.V1_UP	AKT_UP_MTOR_DN.V1_UP	16	16	0.01689	0.0169716	oncogenic_out.txt	Tcell
BRCA1_DN.V1_DN	BRCA1_DN.V1_DN	16	16	0.02109	0.0233336	oncogenic_out.txt	Tcell

## Sheet: Pathway Table
Class	Bcell	Glioma	Hemangiosarcoma	Mammary	MastCell	Melanoma	Osteosarcoma	Tcell
TMED3	61	0	45	16	0	14	54	23
TMEM248	61	0	45	16	0	14	54	23
PTTG2	21	0	45	16	0	14	54	11
MODULE_280	45	0	0	0	0	0	0	16
SLBP	21	0	45	16	0	14	54	11
GAVISH_3CA_MALIGNANT_METAPROGRAM_4_CHROMATIN	29	0	0	0	0	0	10	0
SMG7	21	0	45	16	0	14	54	11
SUGP2	21	0	45	16	0	14	54	11
MYCN	21	0	45	16	0	14	54	11
TIMP4	21	0	45	16	0	14	54	11
TMEM161A	21	0	45	16	0	14	54	11
RCSD1	21	0	45	16	0	14	54	11
SP140L	21	0	45	16	0	14	54	11
SSBP4	21	0	45	16	0	14	54	11
GAVISH_3CA_METAPROGRAM_EPITHELIAL_MYC	19	0	0	0	0	0	0	0
GAVISH_3CA_METAPROGRAM_CD8_T_CELLS_NAIVE_2	29	0	0	0	0	0	0	9
MB	23	0	0	0	0	0	0	0
SBNO2	24	0	0	0	0	0	0	0
GNF2_DDX5	24	0	0	0	0	0	10	0
SUSD4	21	0	45	16	0	14	54	11
GNF2_BUB3	21	0	45	16	0	14	54	11
JUN	19	0	0	0	0	0	0	0
LMNB2	19	0	0	0	0	0	0	0
MODULE_458	21	0	45	16	0	14	54	11
GAVISH_3CA_METAPROGRAM_CD4_T_CELLS_NAIVE_2	29	0	0	0	0	0	0	9
SNRPB2	21	0	45	16	7	0	54	11
MODULE_540	19	0	0	0	0	0	0	0
HCAR3	19	0	0	0	0	0	0	0
EWSR1	19	0	0	0	0	0	0	0
GAVISH_3CA_MALIGNANT_METAPROGRAM_20_MYC	19	0	0	0	0	0	0	0
IRF8	21	0	45	16	0	14	54	11
LRP8	19	0	0	0	0	0	0	0
KRT86	19	0	0	0	0	0	0	0
MODULE_262	19	0	0	0	0	0	0	0
GAVISH_3CA_METAPROGRAM_B_CELLS_HSP_STRESS	19	0	0	0	0	0	0	0
ITGB3BP	19	0	0	0	0	0	0	0
MODULE_191	19	0	0	0	0	0	0	0
KIFC1	19	0	0	0	0	0	0	0
MORF_CUL1	11	0	0	0	0	0	0	0
TCTN1	21	0	45	0	0	0	54	11
JRK	19	0	0	0	0	0	0	0
JAK3	19	0	0	0	0	0	0	0
KRT18	19	0	0	0	0	0	0	0
MODULE_332	19	0	0	0	0	0	0	0
MORF_RFC5	19	0	0	0	0	0	0	0
FGF4	19	0	0	0	0	0	0	0
GAVISH_3CA_MALIGNANT_METAPROGRAM_22_SECRETED_1	19	0	0	0	0	0	0	0
HNF1A	19	0	0	0	0	0	0	0
GNF2_CD53	8	0	0	0	0	0	0	0
MTA1	19	0	0	0	0	0	0	0
KMT2D	9	0	0	0	0	0	0	0
ITK	19	0	0	0	0	0	0	0
GAVISH_3CA_MALIGNANT_METAPROGRAM_33_RBCS	19	0	0	0	0	0	0	0
ESR1	19	0	0	0	0	0	0	0
GAVISH_3CA_METAPROGRAM_FIBROBLASTS_STRESS	19	0	0	0	0	0	0	0
GNF2_VAV1	8	0	0	0	0	0	0	0
HABP4	19	0	0	0	0	0	0	0
GSTP1	19	0	0	0	0	0	0	0
GAVISH_3CA_METAPROGRAM_CD8_T_CELLS_NAIVE_3	10	0	0	0	0	0	0	9
MODULE_61	19	0	0	0	0	0	0	0
MORF_MYC	19	0	0	0	0	0	0	0
GCM_SMO	11	0	0	0	0	0	0	0
LPAR2	19	0	0	0	0	0	0	0
DDX21	6	0	0	0	0	0	0	0
GNF2_HAT1	5	0	0	0	0	0	0	0
HALLMARK_WNT_BETA_CATENIN_SIGNALING	35	0	45	0	0	0	54	0
HALLMARK_MYC_TARGETS_V2	19	0	0	0	0	0	0	0
HALLMARK_DNA_REPAIR	21	0	45	16	0	0	54	11
HALLMARK_E2F_TARGETS	35	0	45	0	0	0	54	0
GSE12366_GC_BCELL_VS_PLASMA_CELL_UP	58	0	45	22	0	0	54	14
GSE29618_PRE_VS_DAY7_FLU_VACCINE_MONOCYTE_UP	60	0	0	0	0	0	0	22
GSE18791_UNSTIM_VS_NEWCATSLE_VIRUS_DC_10H_UP	51	0	0	0	0	0	0	16
GSE27786_LIN_NEG_VS_NEUTROPHIL_DN	48	0	0	14	0	0	0	16
GSE20198_UNTREATED_VS_IL12_TREATED_ACT_CD4_TCELL_DN	56	0	0	0	0	0	0	16
GSE14000_UNSTIM_VS_16H_LPS_DC_TRANSLATED_RNA_UP	45	0	0	0	0	0	0	16
GSE41867_DAY15_EFFECTOR_VS_DAY30_MEMORY_CD8_TCELL_LCMV_ARMSTRONG_UP	47	0	0	0	0	0	0	26
GSE12505_WT_VS_E2_2_HET_PDC_DN	45	0	0	0	0	0	0	16
GSE22103_UNSTIM_VS_LPS_STIM_NEUTROPHIL_UP	48	0	0	0	0	0	0	16
GSE7509_DC_VS_MONOCYTE_WITH_FCGRIIB_STIM_UP	56	0	0	0	0	0	0	21
GSE40655_FOXO1_KO_VS_WT_NTREG_UP	48	0	0	0	0	0	0	16
GSE12366_PLASMA_CELL_VS_NAIVE_BCELL_DN	53	0	0	0	0	0	0	15
GSE27786_LIN_NEG_VS_NKTCELL_DN	45	0	0	0	0	0	0	16
GSE31082_DN_VS_CD4_SP_THYMOCYTE_DN	56	0	0	0	0	0	0	21
KAECH_DAY15_EFF_VS_MEMORY_CD8_TCELL_DN	46	0	45	0	0	0	54	18
GSE25123_ROSIGLITAZONE_VS_IL4_AND_ROSIGLITAZONE_STIM_PPARG_KO_MACROPHAGE_DAY10_UP	55	0	0	0	0	0	0	25
GSE14026_TH1_VS_TH17_UP	45	0	0	0	0	0	0	16
GSE41867_NAIVE_VS_EFFECTOR_CD8_TCELL_DN	45	0	0	0	0	0	0	16
GSE2405_0H_VS_9H_A_PHAGOCYTOPHILUM_STIM_NEUTROPHIL_UP	45	0	0	0	0	0	0	16
GSE5503_PLN_DC_VS_SPLEEN_DC_ACTIVATED_ALLOGENIC_TCELL_DN	45	0	0	0	0	0	0	16
GSE29618_PRE_VS_DAY7_POST_TIV_FLU_VACCINE_MONOCYTE_UP	48	0	0	0	0	0	0	17
GSE10239_NAIVE_VS_MEMORY_CD8_TCELL_UP	55	0	0	0	0	0	0	25
GSE17974_CTRL_VS_ACT_IL4_AND_ANTI_IL12_12H_CD4_TCELL_DN	45	0	0	0	0	0	0	16
GSE19198_6H_VS_24H_IL21_TREATED_TCELL_DN	38	0	0	0	0	0	0	0
GSE11961_MARGINAL_ZONE_BCELL_VS_PLASMA_CELL_DAY7_UP	37	0	45	0	0	0	54	21
GSE22601_IMMATURE_CD4_SINGLE_POSITIVE_VS_CD4_SINGLE_POSITIVE_THYMOCYTE_DN	45	0	0	0	0	0	0	16
GSE19198_CTRL_VS_IL21_TREATED_TCELL_6H_UP	53	0	0	0	0	0	0	0
GSE40274_FOXP3_VS_FOXP3_AND_SATB1_TRANSDUCED_ACTIVATED_CD4_TCELL_DN	45	0	0	0	0	0	0	16
GSE5589_IL6_KO_VS_IL10_KO_LPS_AND_IL10_STIM_MACROPHAGE_45MIN_UP	55	0	0	0	0	0	0	25
GSE36009_WT_VS_NLRP10_KO_DC_DN	54	0	0	0	0	0	0	19
GSE360_L_MAJOR_VS_B_MALAYI_HIGH_DOSE_MAC_DN	45	0	0	0	0	0	0	16
GSE23308_CTRL_VS_CORTICOSTERONE_TREATED_MACROPHAGE_MINERALCORTICOID_REC_KO_UP	41	0	0	0	0	0	0	17
GSE2405_0H_VS_6H_A_PHAGOCYTOPHILUM_STIM_NEUTROPHIL_UP	45	0	0	0	0	0	0	16
GSE2770_IL4_ACT_VS_ACT_CD4_TCELL_48H_DN	45	0	0	0	0	0	0	16
GSE35435_RESTING_VS_IL4_TREATED_MACROPHAGE_UP	47	0	0	0	0	0	0	26
GSE339_CD8POS_VS_CD4CD8DN_DC_DN	55	0	0	0	0	0	0	25
GSE2770_UNTREATED_VS_ACT_CD4_TCELL_2H_UP	45	0	0	0	0	0	0	16
GSE37301_LYMPHOID_PRIMED_MPP_VS_GRAN_MONO_PROGENITOR_UP	63	0	0	0	0	0	0	25
GSE27786_BCELL_VS_NEUTROPHIL_UP	31	0	0	0	0	0	0	0
GSE17186_NAIVE_VS_CD21LOW_TRANSITIONAL_BCELL_UP	55	0	0	0	0	0	0	25
GSE7768_OVA_ALONE_VS_OVA_WITH_LPS_IMMUNIZED_MOUSE_WHOLE_SPLEEN_6H_UP	27	0	0	0	0	0	0	17
GSE24210_RESTING_TREG_VS_TCONV_UP	45	0	0	0	0	0	0	16
GSE3920_UNTREATED_VS_IFNA_TREATED_FIBROBLAST_UP	48	0	0	0	0	0	0	0
GSE24671_CTRL_VS_SENDAI_VIRUS_INFECTED_MOUSE_SPLENOCYTES_DN	48	0	0	0	0	0	0	16
GSE25088_CTRL_VS_ROSIGLITAZONE_STIM_STAT6_KO_MACROPHAGE_DN	45	0	0	0	0	0	0	16
GSE21546_ELK1_KO_VS_SAP1A_KO_AND_ELK1_KO_ANTI_CD3_STIM_DP_THYMOCYTES_UP	25	0	0	0	0	0	0	0
GSE8621_UNSTIM_VS_LPS_STIM_MACROPHAGE_DN	45	0	0	0	0	0	0	16
GSE411_UNSTIM_VS_100MIN_IL6_STIM_SOCS3_KO_MACROPHAGE_UP	45	0	0	0	0	0	0	16
GSE9006_HEALTHY_VS_TYPE_1_DIABETES_PBMC_1MONTH_POST_DX_DN	45	0	0	0	0	0	0	0
GSE33162_HDAC3_KO_VS_HDAC3_KO_4H_LPS_STIM_MACROPHAGE_UP	27	0	0	0	0	0	0	17
GSE10273_HIGH_VS_LOW_IL7_TREATED_IRF4_8_NULL_PRE_BCELL_DN	45	0	0	0	0	0	0	16
GSE36476_YOUNG_VS_OLD_DONOR_MEMORY_CD4_TCELL_40H_TSST_ACT_DN	56	0	0	0	0	0	0	21
GSE21670_STAT3_KO_VS_WT_CD4_TCELL_DN	46	0	45	0	0	0	54	0
GSE26928_NAIVE_VS_CXCR5_POS_CD4_TCELL_DN	33	0	0	0	0	0	0	21
GSE35825_UNTREATED_VS_IFNG_STIM_MACROPHAGE_DN	36	0	0	0	0	0	0	0
GSE37301_LYMPHOID_PRIMED_MPP_VS_RAG2_KO_NK_CELL_UP	55	0	0	0	0	0	0	25
GSE21670_UNTREATED_VS_IL6_TREATED_STAT3_KO_CD4_TCELL_DN	42	0	45	0	0	0	54	16
GSE2706_UNSTIM_VS_2H_R848_DC_UP	24	0	0	0	0	0	10	6
GSE27786_CD8_TCELL_VS_MONO_MAC_UP	24	0	0	0	0	0	0	0
GSE9006_HEALTHY_VS_TYPE_1_DIABETES_PBMC_AT_DX_DN	53	0	0	0	0	0	0	0
GSE1925_CTRL_VS_IFNG_PRIMED_MACROPHAGE_24H_IFNG_STIM_DN	48	0	0	0	0	0	0	0
NAKAYA_PBMC_FLUMIST_AGE_18_50YO_7DY_IFN_SUBSET_UP	21	0	45	16	0	0	54	11
GSE29164_CD8_TCELL_VS_CD8_TCELL_AND_IL12_TREATED_MELANOMA_DAY7_UP	45	0	0	0	0	0	0	16
GSE339_EX_VIVO_VS_IN_CULTURE_CD8POS_DC_DN	55	0	0	0	0	0	0	25
GSE20715_0H_VS_48H_OZONE_TLR4_KO_LUNG_DN	53	0	0	0	0	0	0	0
GSE360_T_GONDII_VS_B_MALAYI_HIGH_DOSE_MAC_DN	45	0	0	0	0	0	0	0
GSE17301_CTRL_VS_48H_IFNA2_STIM_CD8_TCELL_UP	49	0	0	0	0	0	0	21
GSE29618_LAIV_VS_TIV_FLU_VACCINE_DAY7_MDC_DN	51	0	0	0	0	0	0	0
GSE3982_MAC_VS_BASOPHIL_UP	45	0	0	0	0	0	0	0
GSE27786_LSK_VS_NEUTROPHIL_DN	45	0	0	0	0	0	0	16
GSE24026_PD1_LIGATION_VS_CTRL_IN_ACT_TCELL_LINE_DN	45	0	0	0	0	0	0	16
GSE27786_BCELL_VS_CD8_TCELL_UP	45	0	0	0	0	0	0	16
GSE3039_NKT_CELL_VS_B1_BCELL_DN	51	0	0	0	0	0	0	0
GSE13306_TREG_VS_TCONV_SPLEEN_DN	35	0	0	0	0	0	0	0
GSE20754_WT_VS_TCF1_KO_MEMORY_CD8_TCELL_DN	40	0	0	0	0	0	0	0
GSE17721_0.5H_VS_4H_PAM3CSK4_BMDC_UP	35	0	0	0	0	0	0	0
GSE17301_ACD3_ACD28_VS_ACD3_ACD28_AND_IFNA2_STIM_CD8_TCELL_DN	45	0	0	0	0	0	0	16
GSE17974_IL4_AND_ANTI_IL12_VS_UNTREATED_48H_ACT_CD4_TCELL_DN	45	0	0	0	0	0	0	16
GSE1566_WT_VS_EZH2_KO_LN_TCELL_DN	45	0	0	0	0	0	0	16
GSE24210_CTRL_VS_IL35_TREATED_TCONV_CD4_TCELL_UP	50	0	0	0	0	0	0	0
QIU_PBMC_HEPTATITIS_B_SURFACE_ANTIGEN_AGE_UNDER50_NON_RESPONDERS_VS_RESPONDERS_0DY_UP	15	0	0	0	0	0	0	0
GSE11057_CD4_CENT_MEM_VS_PBMC_UP	33	0	0	0	0	0	0	23
GSE2770_IL12_AND_TGFB_ACT_VS_ACT_CD4_TCELL_2H_UP	49	0	0	0	0	0	0	21
GSE3920_IFNA_VS_IFNB_TREATED_ENDOTHELIAL_CELL_DN	45	0	0	0	0	0	0	0
GSE21927_SPLENIC_VS_TUMOR_MONOCYTES_FROM_C26GM_TUMOROUS_MICE_BALBC_DN	27	0	23	50	0	0	0	0
GSE10273_LOW_IL7_VS_HIGH_IL7_AND_IRF4_IN_IRF4_8_NULL_PRE_BCELL_DN	45	0	0	0	0	0	0	16
GSE14000_4H_VS_16H_LPS_DC_TRANSLATED_RNA_DN	25	0	0	0	0	0	0	0
GSE14000_4H_VS_16H_LPS_DC_DN	25	0	0	0	0	0	0	0
GSE27786_LIN_NEG_VS_NEUTROPHIL_UP	26	0	0	0	0	0	0	0
GSE2770_IL4_ACT_VS_ACT_CD4_TCELL_2H_DN	56	0	0	0	0	0	0	21
GSE41867_LCMV_ARMSTRONG_VS_CLONE13_DAY6_EFFECTOR_CD8_TCELL_DN	45	0	0	0	0	0	0	0
GSE27786_CD8_TCELL_VS_NKTCELL_UP	29	0	0	0	0	0	0	0
GSE411_UNSTIM_VS_100MIN_IL6_STIM_MACROPHAGE_DN	45	0	0	0	0	0	0	0
GSE31082_DN_VS_CD8_SP_THYMOCYTE_DN	48	0	0	0	0	0	0	0
GSE17301_CTRL_VS_48H_ACD3_ACD28_STIM_CD8_TCELL_UP	35	0	45	0	0	0	54	0
KAECH_DAY8_EFF_VS_MEMORY_CD8_TCELL_DN	46	0	45	0	0	0	54	0
GSE9037_CTRL_VS_LPS_4H_STIM_IRAK4_KO_BMDM_DN	45	0	0	0	0	0	0	0
GSE17974_0H_VS_1H_IN_VITRO_ACT_CD4_TCELL_DN	45	0	0	0	0	0	0	16
GSE21063_CTRL_VS_ANTI_IGM_STIM_BCELL_NFATC1_KO_3H_DN	24	0	23	56	0	0	0	0
GSE17721_POLYIC_VS_CPG_2H_BMDC_UP	34	0	0	0	0	0	0	17
GSE17974_CTRL_VS_ACT_IL4_AND_ANTI_IL12_2H_CD4_TCELL_DN	45	0	0	0	0	0	0	16
GSE34515_CD16_POS_MONOCYTE_VS_DC_DN	45	0	0	0	0	0	0	0
GSE15750_WT_VS_TRAF6KO_DAY10_EFF_CD8_TCELL_UP	38	0	0	0	0	0	0	0
GSE2770_IL12_VS_IL4_TREATED_ACT_CD4_TCELL_48H_DN	45	0	0	0	0	0	0	0
GSE22282_HYPOXIA_VS_NORMOXIA_MYELOID_DC_UP	45	0	0	0	0	0	0	16
GSE339_CD4POS_VS_CD8POS_DC_UP	55	0	0	0	0	0	0	25
GSE24210_TCONV_VS_TREG_UP	25	0	0	0	0	0	0	0
OXNAD1	24	0	23	56	0	0	0	0
GSE3920_IFNA_VS_IFNG_TREATED_FIBROBLAST_UP	27	0	0	0	0	0	0	17
GSE25085_FETAL_LIVER_VS_ADULT_BM_SP4_THYMIC_IMPLANT_UP	25	0	0	0	0	0	0	0
GSE19198_1H_VS_24H_IL21_TREATED_TCELL_DN	45	0	0	0	0	0	0	16
GSE5589_WT_VS_IL6_KO_LPS_STIM_MACROPHAGE_45MIN_DN	55	0	0	0	0	0	0	25
LINC00987	19	0	0	0	0	0	0	0
GSE42021_TCONV_PLN_VS_TREG_PRECURSORS_THYMUS_UP	48	0	0	0	0	0	0	0
GSE1460_DP_THYMOCYTE_VS_NAIVE_CD4_TCELL_ADULT_BLOOD_DN	48	0	0	0	0	0	0	0
QIU_PBMC_HEPTATITIS_B_SURFACE_ANTIGEN_AGE_UNDER50_NON_RESPONDERS_VS_RESPONDERS_3DY_UP	15	0	0	0	0	0	0	0
GSE17721_POLYIC_VS_PAM3CSK4_2H_BMDC_UP	27	0	0	0	0	0	0	19
GSE27786_LIN_NEG_VS_BCELL_DN	24	0	0	0	0	0	0	0
GSE37416_0H_VS_24H_F_TULARENSIS_LVS_NEUTROPHIL_DN	45	0	0	0	0	0	0	0
GSE20198_UNTREATED_VS_IFNA_TREATED_ACT_CD4_TCELL_UP	45	0	0	0	0	0	0	16
GSE22103_UNSTIM_VS_GMCSF_AND_IFNG_STIM_NEUTROPHIL_UP	25	0	0	0	0	0	0	0
GSE8621_UNSTIM_VS_LPS_PRIMED_UNSTIM_MACROPHAGE_DN	45	0	0	0	0	0	0	0
GSE37416_CTRL_VS_24H_F_TULARENSIS_LVS_NEUTROPHIL_DN	45	0	0	0	0	0	0	0
GSE37416_0H_VS_12H_F_TULARENSIS_LVS_NEUTROPHIL_DN	45	0	0	0	0	0	0	0
GSE32986_CURDLAN_LOWDOSE_VS_CURDLAN_HIGHDOSE_STIM_DC_DN	45	0	0	0	0	0	0	0
GSE2405_S_AUREUS_VS_A_PHAGOCYTOPHILUM_NEUTROPHIL_UP	45	0	0	0	0	0	0	0
GSE22886_TH1_VS_TH2_12H_ACT_UP	50	0	0	0	0	0	0	0
GSE11057_CD4_EFF_MEM_VS_PBMC_UP	25	0	0	0	0	0	0	0
GSE9650_EFFECTOR_VS_MEMORY_CD8_TCELL_DN	44	0	45	0	0	0	54	0
GSE26890_CXCR1_NEG_VS_POS_EFFECTOR_CD8_TCELL_DN	45	0	0	0	0	0	0	0
GSE22886_NAIVE_BCELL_VS_BM_PLASMA_CELL_UP	30	0	0	0	0	0	0	0
HCFC2	25	0	0	0	0	0	0	0
GSE13411_NAIVE_VS_MEMORY_BCELL_DN	45	0	0	0	0	0	0	0
GSE22886_NAIVE_VS_IGM_MEMORY_BCELL_DN	45	0	0	0	0	0	0	0
GSE360_L_DONOVANI_VS_B_MALAYI_LOW_DOSE_DC_UP	50	0	0	0	0	0	0	0
GSE17721_LPS_VS_POLYIC_6H_BMDC_DN	36	0	0	0	0	0	0	0
GSE20198_IL12_VS_IFNA_TREATED_ACT_CD4_TCELL_UP	21	0	45	16	0	0	54	11
GSE8515_IL1_VS_IL6_4H_STIM_MAC_UP	45	0	0	0	0	0	0	0
GSE19401_UNSTIM_VS_PAM2CSK4_STIM_FOLLICULAR_DC_UP	45	0	0	0	0	0	0	0
GSE26343_WT_VS_NFAT5_KO_MACROPHAGE_DN	45	0	0	0	0	0	0	0
GSE19401_PLN_VS_PEYERS_PATCH_FOLLICULAR_DC_DN	45	0	0	0	0	0	0	0
GSE32986_CURDLAN_HIGHDOSE_VS_GMCSF_AND_CURDLAN_HIGHDOSE_STIM_DC_DN	45	0	0	0	0	0	0	0
GSE6259_BCELL_VS_CD4_TCELL_UP	21	0	45	23	0	0	54	11
GSE14000_4H_VS_16H_LPS_DC_TRANSLATED_RNA_UP	48	0	0	0	0	0	0	0
RING1	15	0	0	0	0	0	0	0
GSE13306_TREG_VS_TCONV_DN	25	0	0	0	0	0	0	0
GSE29618_BCELL_VS_MDC_UP	19	0	0	0	0	0	0	0
GSE6674_ANTI_IGM_VS_CPG_STIM_BCELL_UP	25	0	0	0	0	0	0	0
MED6	21	0	0	0	0	0	0	0
GSE13485_DAY1_VS_DAY21_YF17D_VACCINE_PBMC_DN	25	0	0	0	0	0	0	0
GSE19198_CTRL_VS_IL21_TREATED_TCELL_6H_DN	30	0	0	0	0	0	0	0
GSE6674_CPG_VS_PL2_3_STIM_BCELL_DN	28	0	0	0	0	0	0	0
GSE37301_MULTIPOTENT_PROGENITOR_VS_RAG2_KO_NK_CELL_DN	43	0	47	62	0	0	54	0
GSE1460_DP_THYMOCYTE_VS_THYMIC_STROMAL_CELL_DN	45	0	0	0	0	0	0	0
GSE3691_CONVENTIONAL_VS_PLASMACYTOID_DC_SPLEEN_UP	27	0	0	0	0	0	0	17
GSE360_L_MAJOR_VS_B_MALAYI_LOW_DOSE_DC_UP	53	0	0	0	0	0	0	0
GSE3982_BCELL_VS_NKCELL_UP	45	0	0	0	0	0	0	0
GSE14415_FOXP3_KO_NATURAL_TREG_VS_TCONV_DN	29	0	0	0	0	0	0	0
GSE46606_DAY1_VS_DAY3_CD40L_IL2_IL5_STIMULATED_IRF4_KO_BCELL_UP	31	0	45	0	0	0	54	0
GSE2770_UNTREATED_VS_IL4_TREATED_ACT_CD4_TCELL_6H_DN	36	0	0	0	0	0	0	0
GSE36476_CTRL_VS_TSST_ACT_72H_MEMORY_CD4_TCELL_OLD_UP	28	0	0	0	0	0	0	0
GSE41176_WT_VS_TAK1_KO_ANTI_IGM_STIM_BCELL_1H_UP	25	0	0	0	0	0	0	0
GSE21360_PRIMARY_VS_QUATERNARY_MEMORY_CD8_TCELL_DN	24	0	23	50	0	0	0	0
GSE27786_BCELL_VS_MONO_MAC_UP	24	0	0	0	0	0	0	0
GSE29618_LAIV_VS_TIV_FLU_VACCINE_DAY7_PDC_UP	25	0	0	0	0	0	0	0
GSE3982_CTRL_VS_LPS_4H_MAC_UP	25	0	0	0	0	0	0	0
GSE17721_CTRL_VS_CPG_0.5H_BMDC_UP	55	0	0	0	0	0	0	25
GSE17721_CPG_VS_GARDIQUIMOD_0.5H_BMDC_DN	45	0	0	0	0	0	0	0
GSE17721_12H_VS_24H_LPS_BMDC_DN	25	0	0	0	0	0	0	0
GSE9988_ANTI_TREM1_VS_CTRL_TREATED_MONOCYTES_DN	19	0	0	0	9	0	0	0
GSE17721_PAM3CSK4_VS_GADIQUIMOD_6H_BMDC_UP	27	0	0	0	0	0	0	0
GSE17721_PAM3CSK4_VS_CPG_4H_BMDC_UP	25	0	0	0	0	0	0	0
GSE46468_LUNG_INNATE_LYMPHOID_CELL_VS_SPLEEN_CD4_TCELL_DN	27	0	0	0	0	0	0	19
GSE3720_LPS_VS_PMA_STIM_VD1_GAMMADELTA_TCELL_DN	29	0	0	0	0	0	0	0
GSE17721_PAM3CSK4_VS_CPG_0.5H_BMDC_UP	45	0	0	0	0	0	0	0
GSE44649_NAIVE_VS_ACTIVATED_CD8_TCELL_DN	23	0	0	0	0	0	0	0
GSE21063_CTRL_VS_ANTI_IGM_STIM_BCELL_NFATC1_KO_8H_UP	24	0	23	56	0	0	0	0
GSE3565_DUSP1_VS_WT_SPLENOCYTES_DN	29	0	0	0	0	0	0	0
BUCASAS_PBMC_FLUARIX_FLUVIRIN_CAUCASIAN_MALE_AGE_18_40YO_LOW_RESPONDERS_1DY_POSITIVE_PREDICTIVE_OF_TITER	8	0	6	10	0	0	0	0
GSE15659_NAIVE_CD4_TCELL_VS_RESTING_TREG_DN	21	0	45	0	0	0	54	11
GSE36476_CTRL_VS_TSST_ACT_16H_MEMORY_CD4_TCELL_OLD_UP	24	0	0	0	0	0	0	0
GSE32901_TH1_VS_TH17_NEG_CD4_TCELL_UP	24	0	0	0	0	0	0	0
GSE20500_CTRL_VS_RARA_ANTAGONIST_TREATED_CD4_TCELL_DN	21	0	45	0	0	0	54	11
GSE17721_CPG_VS_GARDIQUIMOD_8H_BMDC_DN	45	0	0	0	0	0	0	0
GSE360_HIGH_DOSE_B_MALAYI_VS_M_TUBERCULOSIS_MAC_UP	45	0	0	0	0	0	0	0
GSE27786_CD8_TCELL_VS_NEUTROPHIL_UP	24	0	0	0	0	0	0	0
GSE15330_LYMPHOID_MULTIPOTENT_VS_MEGAKARYOCYTE_ERYTHROID_PROGENITOR_UP	27	0	0	0	0	0	0	0
GSE29164_UNTREATED_VS_CD8_TCELL_TREATED_MELANOMA_DAY3_DN	25	0	0	0	0	0	0	0
GSE1925_CTRL_VS_IFNG_PRIMED_MACROPHAGE_24H_IFNG_STIM_UP	45	0	0	0	0	0	0	0
GSE21678_WT_VS_FOXO1_FOXO3_KO_TREG_DN	19	0	0	0	0	0	0	0
GSE18791_CTRL_VS_NEWCASTLE_VIRUS_DC_16H_UP	19	0	0	0	0	0	0	0
GSE3565_CTRL_VS_LPS_INJECTED_DUSP1_KO_SPLENOCYTES_DN	29	0	0	0	0	0	0	0
GSE24026_PD1_LIGATION_VS_CTRL_IN_ACT_TCELL_LINE_UP	24	0	0	0	0	0	0	17
GSE6259_DEC205_POS_DC_VS_CD4_TCELL_DN	23	0	0	0	0	0	0	0
GSE1460_DP_VS_CD4_THYMOCYTE_DN	48	0	0	0	0	0	0	0
GSE27291_0H_VS_6H_STIM_GAMMADELTA_TCELL_UP	21	0	45	0	0	0	54	11
GSE3982_EOSINOPHIL_VS_MAST_CELL_UP	16	0	0	0	0	0	0	0
GSE17721_0.5H_VS_4H_LPS_BMDC_UP	21	0	45	0	0	0	54	11
GSE3982_DC_VS_TH2_UP	45	0	0	0	0	0	0	0
GSE29618_PRE_VS_DAY7_POST_LAIV_FLU_VACCINE_PDC_DN	18	0	0	0	0	0	0	0
GSE26343_UNSTIM_VS_LPS_STIM_NFAT5_KO_MACROPHAGE_DN	45	0	0	0	0	0	0	0
GSE37532_VISCERAL_ADIPOSE_TISSUE_VS_LN_DERIVED_PPARG_KO_TCONV_CD4_TCELL_DN	11	0	0	0	0	0	0	0
GSE25088_IL4_VS_IL4_AND_ROSIGLITAZONE_STIM_STAT6_KO_MACROPHAGE_DAY10_DN	45	0	0	0	0	0	0	0
GSE13411_IGM_MEMORY_BCELL_VS_PLASMA_CELL_UP	15	0	0	0	0	0	0	9
GSE21927_SPLEEN_C57BL6_VS_EL4_TUMOR_BALBC_MONOCYTES_UP	34	0	23	50	0	0	0	15
GSE14308_TH1_VS_NAIVE_CD4_TCELL_DN	22	0	0	0	0	0	0	15
GSE18791_UNSTIM_VS_NEWCATSLE_VIRUS_DC_18H_UP	19	0	0	0	0	0	0	0
GSE25088_CTRL_VS_ROSIGLITAZONE_STIM_STAT6_KO_MACROPHAGE_UP	21	0	45	0	0	0	54	11
GSE25088_CTRL_VS_IL4_AND_ROSIGLITAZONE_STIM_MACROPHAGE_UP	29	0	23	50	0	0	0	0
GSE14415_INDUCED_TREG_VS_FAILED_INDUCED_TREG_UP	19	0	0	0	0	0	0	0
GSE17974_1.5H_VS_72H_IL4_AND_ANTI_IL12_ACT_CD4_TCELL_DN	15	0	0	0	0	0	0	0
GSE21033_CTRL_VS_POLYIC_STIM_DC_3H_DN	24	0	0	0	0	0	0	0
GSE22919_RESTING_VS_IL2_IL12_IL15_STIM_NK_CELL_UP	24	0	0	0	0	0	0	0
GSE27786_BCELL_VS_NKCELL_UP	24	0	0	0	0	0	0	0
GSE34392_ST2_KO_VS_WT_DAY8_LCMV_EFFECTOR_CD8_TCELL_DN	45	0	0	0	0	0	0	0
GSE25085_FETAL_LIVER_VS_ADULT_BM_SP4_THYMIC_IMPLANT_DN	15	0	0	0	0	0	0	0
GSE12845_IGD_NEG_BLOOD_VS_NAIVE_TONSIL_BCELL_DN	21	0	0	0	0	0	0	0
GSE27241_WT_VS_RORGT_KO_TH17_POLARIZED_CD4_TCELL_TREATED_WITH_DIGOXIN_UP	27	0	0	0	0	0	0	0
GSE33162_UNTREATED_VS_4H_LPS_STIM_HDAC3_HET_MACROPHAGE_DN	32	0	0	0	0	0	0	0
GSE21927_UNTREATED_VS_GMCSF_GCSF_TREATED_BONE_MARROW_DN	16	0	0	0	0	0	0	0
GSE12003_4D_VS_8D_CULTURE_BM_PROGENITOR_DN	16	0	0	0	0	0	0	17
GSE14415_INDUCED_TREG_VS_FOXP3_KO_INDUCED_TREG_UP	29	0	0	0	0	0	0	0
GSE21033_1H_VS_12H_POLYIC_STIM_DC_DN	24	0	29	50	0	0	0	0
GSE3565_CTRL_VS_LPS_INJECTED_SPLENOCYTES_DN	29	0	0	0	0	0	0	0
GSE2706_R848_VS_LPS_8H_STIM_DC_UP	19	0	0	0	0	0	0	0
GSE10211_UV_INACT_SENDAI_VS_LIVE_SENDAI_VIRUS_TRACHEAL_EPITHELIAL_CELLS_DN	21	0	0	0	0	0	0	0
GSE13493_CD4INTCD8POS_VS_CD8POS_THYMOCYTE_UP	16	0	0	0	0	0	0	0
GSE15659_CD45RA_NEG_CD4_TCELL_VS_RESTING_TREG_DN	21	0	45	0	0	0	54	0
GSE14769_40MIN_VS_360MIN_LPS_BMDM_UP	19	0	0	0	0	0	0	0
GSE17974_IL4_AND_ANTI_IL12_VS_UNTREATED_2H_ACT_CD4_TCELL_UP	28	0	0	0	0	0	0	20
GSE17186_MEMORY_VS_NAIVE_BCELL_UP	19	0	0	0	0	0	0	0
GSE17721_0.5H_VS_4H_CPG_BMDC_UP	15	0	0	0	0	0	0	0
GSE1460_CD4_THYMOCYTE_VS_NAIVE_CD4_TCELL_ADULT_BLOOD_UP	45	0	0	0	0	0	0	0
GSE10239_MEMORY_VS_DAY4.5_EFF_CD8_TCELL_UP	27	0	0	0	0	0	0	0
BRCA1_DN.V1_DN	45	0	0	0	0	0	0	16
AKT_UP_MTOR_DN.V1_UP	45	0	0	0	0	0	0	16
E2F1_UP.V1_UP	45	0	0	0	0	0	0	16
PDGF_ERK_DN.V1_DN	29	15	0	0	0	0	0	0
MEK_UP.V1_DN	36	0	0	0	0	0	0	0
EGFR_UP.V1_DN	35	0	0	0	0	0	0	0
KRTAP5-9	0	15	0	0	0	0	0	0
MAT1A	0	15	0	0	0	0	0	0
MARCKS	0	15	0	0	0	0	0	0
MARF1	0	15	0	0	0	0	0	0
NAAA	0	15	0	0	0	0	0	0
IGFBP7	0	15	0	0	0	0	0	0
NEURL1	0	15	0	0	0	0	0	0
MEF2C	0	15	0	0	0	0	0	0
GAVISH_3CA_MALIGNANT_METAPROGRAM_27_OLIGO_PROGENITOR	0	15	0	0	0	0	0	0
NAB2	0	15	0	0	0	0	0	0
NAPSA	0	15	0	0	0	0	0	0
LRP1	0	15	0	0	0	0	0	0
NFKBIB	0	15	0	0	0	0	0	0
GAVISH_3CA_METAPROGRAM_FIBROBLASTS_CAF_7	0	15	0	0	0	0	0	0
P2RX5	0	15	0	0	0	0	0	0
GAVISH_3CA_METAPROGRAM_FIBROBLASTS_CAF_10	0	15	0	0	0	0	0	0
PCCA	0	17	0	0	0	0	0	0
NECTIN1	0	15	0	0	0	0	0	0
PCK1	0	17	0	0	0	0	0	0
NPY2R	0	15	0	0	0	0	0	0
NPAS1	0	15	0	0	0	0	0	0
LYN	0	15	0	0	0	0	0	0
NCF4	0	15	0	0	0	0	0	0
NECAB3	0	15	0	0	0	0	0	0
P2RY14	0	15	0	0	0	0	0	0
PCLAF	0	15	0	0	0	0	0	0
MODULE_51	0	15	0	0	0	0	0	0
MODULE_80	0	15	0	0	0	0	0	0
NEO1	0	15	0	0	0	0	0	0
ME1	0	15	0	0	0	0	0	0
MYC	0	15	0	0	0	0	0	0
MODULE_200	0	15	0	0	0	0	0	0
MXD4	0	15	0	0	0	0	0	0
PAX6	0	15	0	0	0	0	0	0
NCALD	0	15	0	0	0	0	0	0
NTSR2	0	15	0	0	0	0	0	0
NQO1	0	15	0	0	0	0	0	0
NMB	0	15	0	0	0	0	0	0
MYO10	0	15	0	0	0	0	0	0
GNLY	0	15	0	0	0	0	0	0
MODULE_259	0	15	0	0	0	0	0	0
GJB1	0	15	0	0	0	0	0	0
GSE27786_CD8_TCELL_VS_NKCELL_UP	0	15	0	0	0	0	0	0
GSE15324_ELF4_KO_VS_WT_ACTIVATED_CD8_TCELL_DN	0	15	0	0	0	0	0	0
GSE3982_EOSINOPHIL_VS_TH1_DN	0	15	0	0	0	0	0	0
GSE9037_CTRL_VS_LPS_1H_STIM_BMDM_DN	0	15	0	0	0	0	0	0
GSE21927_SPLENIC_C26GM_TUMOROUS_VS_4T1_TUMOR_MONOCYTES_UP	0	15	0	0	0	0	0	0
GSE15330_LYMPHOID_MULTIPOTENT_VS_PRO_BCELL_UP	0	17	0	0	0	0	0	0
GSE20366_CD103_POS_VS_NEG_TREG_KLRG1NEG_UP	0	15	0	0	0	0	0	0
GSE25088_ROSIGLITAZONE_VS_IL4_AND_ROSIGLITAZONE_STIM_MACROPHAGE_DAY10_DN	0	15	0	0	0	0	0	0
GSE22589_HEALTHY_VS_HIV_INFECTED_DC_DN	0	15	0	0	0	0	0	0
GSE1460_CORD_VS_ADULT_BLOOD_NAIVE_CD4_TCELL_UP	0	15	0	0	0	0	0	0
GSE17721_CTRL_VS_CPG_1H_BMDC_DN	0	15	0	0	0	0	0	0
GSE2405_HEAT_KILLED_VS_LIVE_A_PHAGOCYTOPHILUM_STIM_NEUTROPHIL_24H_DN	0	15	0	0	0	0	0	0
MODULE_237	0	0	25	50	0	0	0	0
HALLMARK_P53_PATHWAY	0	0	45	0	0	0	54	22
GSE6681_DELETED_FOXP3_VS_WT_TREG_DN	0	0	47	62	0	0	54	0
GSE20152_SPHK1_KO_VS_WT_HTNFA_OVERXPRESS_ANKLE_DN	0	0	45	0	0	0	54	0
GSE3982_BASOPHIL_VS_TH2_DN	0	0	45	0	7	0	54	0
GSE17721_CTRL_VS_CPG_6H_BMDC_UP	0	0	45	0	0	0	54	0
GSE21033_CTRL_VS_POLYIC_STIM_DC_12H_DN	0	0	45	0	0	0	54	0
GSE15659_CD45RA_NEG_CD4_TCELL_VS_NONSUPPRESSIVE_TCELL_DN	0	0	47	0	0	0	54	0
GSE24574_BCL6_LOW_TFH_VS_TCONV_CD4_TCELL_DN	0	0	46	0	0	0	54	0
GSE21033_CTRL_VS_POLYIC_STIM_DC_3H_UP	0	0	45	0	0	0	54	0
SLAMF1	0	0	45	0	0	0	54	0
GSE22527_ANTI_CD3_INVIVO_VS_UNTREATED_MOUSE_TREG_DN	0	0	45	0	0	0	54	0
GSE1112_OT1_VS_HY_CD8AB_THYMOCYTE_RTOC_CULTURE_UP	0	0	45	0	7	0	54	0
GSE20152_SPHK1_KO_VS_HTNFA_OVEREXPRESS_ANKLE_DN	0	0	45	0	0	24	54	0
GSE17721_CTRL_VS_GARDIQUIMOD_6H_BMDC_UP	0	0	45	0	0	0	54	0
GSE27786_NKCELL_VS_NKTCELL_DN	0	0	45	0	0	0	54	0
GSE14308_TH2_VS_TH1_DN	0	0	45	0	0	0	54	0
GSE31082_DP_VS_CD4_SP_THYMOCYTE_DN	0	0	45	0	0	0	54	0
GSE26156_DOUBLE_POSITIVE_VS_CD4_SINGLE_POSITIVE_THYMOCYTE_DN	0	0	46	0	0	0	54	0
GSE22033_UNTREATED_VS_ROSIGLITAZONE_TREATED_MEF_UP	0	0	45	30	0	0	54	0
GSE2770_IL12_AND_TGFB_ACT_VS_ACT_CD4_TCELL_48H_UP	0	0	45	0	0	0	54	0
GSE20366_EX_VIVO_VS_DEC205_CONVERSION_NAIVE_CD4_TCELL_DN	0	0	45	0	0	0	54	0
GSE17721_CTRL_VS_PAM3CSK4_4H_BMDC_UP	0	0	45	0	0	0	54	0
GSE16385_MONOCYTE_VS_12H_ROSIGLITAZONE_IL4_TREATED_MACROPHAGE_DN	0	0	45	0	0	0	54	0
GSE9006_TYPE_1_VS_TYPE_2_DIABETES_PBMC_AT_DX_UP	0	0	45	0	0	0	54	0
GSE21670_TGFB_VS_TGFB_AND_IL6_TREATED_CD4_TCELL_DN	0	0	45	0	0	0	54	0
GSE5463_CTRL_VS_DEXAMETHASONE_TREATED_THYMOCYTE_UP	0	0	45	0	0	0	54	0
GSE43863_LY6C_INT_CXCR5POS_VS_LY6C_LOW_CXCR5NEG_EFFECTOR_CD4_TCELL_UP	0	0	45	0	0	0	54	0
GSE2128_CTRL_VS_MIMETOPE_NEGATIVE_SELECTION_DP_THYMOCYTE_NOD_DN	0	0	45	0	0	0	54	0
GSE3039_B2_VS_B1_BCELL_DN	0	0	45	0	0	0	54	0
GSE28726_NAIVE_CD4_TCELL_VS_NAIVE_VA24NEG_NKTCELL_UP	0	0	45	0	0	0	54	0
GSE12845_IGD_POS_BLOOD_VS_NAIVE_TONSIL_BCELL_UP	0	0	45	0	0	0	54	0
GSE25087_FETAL_VS_ADULT_TCONV_UP	0	0	45	0	0	0	54	0
GSE25123_CTRL_VS_IL4_AND_ROSIGLITAZONE_STIM_MACROPHAGE_UP	0	0	45	0	0	0	54	0
GSE16450_CTRL_VS_IFNA_6H_STIM_MATURE_NEURON_CELL_LINE_DN	0	0	45	0	0	0	54	0
GSE8921_UNSTIM_VS_TLR1_2_STIM_MONOCYTE_6H_UP	0	0	45	0	0	0	54	18
GSE9006_HEALTHY_VS_TYPE_2_DIABETES_PBMC_AT_DX_UP	0	0	45	0	0	0	54	0
GSE43863_TFH_VS_LY6C_LOW_CXCR5NEG_EFFECTOR_CD4_TCELL_UP	0	0	45	0	0	0	54	0
GSE19401_NAIVE_VS_IMMUNIZED_MOUSE_PLN_FOLLICULAR_DC_DN	0	0	45	0	0	0	54	0
GSE17974_1.5H_VS_72H_IL4_AND_ANTI_IL12_ACT_CD4_TCELL_UP	0	0	23	50	0	0	0	0
GSE43955_1H_VS_42H_ACT_CD4_TCELL_WITH_TGFB_IL6_UP	0	0	45	0	0	0	54	0
GSE1791_CTRL_VS_NEUROMEDINU_IN_T_CELL_LINE_0.8H_UP	0	0	45	0	0	0	54	0
GSE20500_CTRL_VS_RETINOIC_ACID_TREATED_CD4_TCELL_UP	0	0	45	0	0	0	54	0
GSE22886_UNSTIM_VS_IL2_STIM_NKCELL_DN	0	0	45	0	0	0	54	0
GSE5589_WT_VS_IL6_KO_LPS_STIM_MACROPHAGE_45MIN_UP	0	0	28	55	0	0	0	0
GSE45365_HEALTHY_VS_MCMV_INFECTION_CD8A_DC_UP	0	0	45	0	0	0	54	0
GSE45365_WT_VS_IFNAR_KO_CD8A_DC_MCMV_INFECTION_UP	0	0	45	0	0	0	54	22
GSE360_CTRL_VS_M_TUBERCULOSIS_DC_UP	0	0	45	0	0	0	54	0
GSE360_LOW_DOSE_B_MALAYI_VS_M_TUBERCULOSIS_DC_UP	0	0	45	0	0	0	54	0
GSE14308_TH2_VS_TH17_DN	0	0	45	0	0	0	54	0
GSE42021_CD24HI_TREG_VS_CD24HI_TCONV_THYMUS_UP	0	0	45	0	0	0	54	0
GSE360_T_GONDII_VS_B_MALAYI_LOW_DOSE_MAC_DN	0	0	45	0	0	0	54	0
GSE40666_UNTREATED_VS_IFNA_STIM_CD8_TCELL_90MIN_DN	0	0	23	57	0	0	0	0
GSE36009_UNSTIM_VS_LPS_STIM_DC_DN	0	0	23	50	0	0	0	0
GSE17974_2H_VS_72H_UNTREATED_IN_VITRO_CD4_TCELL_UP	0	0	23	50	0	0	0	0
GSE3982_EFF_MEMORY_CD4_TCELL_VS_TH2_DN	0	0	45	0	0	0	54	0
GSE3982_MAST_CELL_VS_MAC_UP	0	0	45	0	0	0	54	0
GSE40666_STAT1_KO_VS_STAT4_KO_CD8_TCELL_WITH_IFNA_STIM_90MIN_UP	0	0	23	50	0	0	0	0
GSE6875_TCONV_VS_FOXP3_KO_TREG_DN	0	0	45	0	0	0	54	0
GSE41867_NAIVE_VS_DAY8_LCMV_ARMSTRONG_EFFECTOR_CD8_TCELL_DN	0	0	23	50	0	0	0	0
GSE9650_NAIVE_VS_EFF_CD8_TCELL_UP	0	0	45	0	0	0	54	0
KAECH_NAIVE_VS_DAY8_EFF_CD8_TCELL_UP	0	0	45	0	0	0	54	0
GSE21927_C26GM_VS_4T1_TUMOR_MONOCYTE_BALBC_DN	0	0	23	50	0	0	0	0
GSE15215_CD2_POS_VS_NEG_PDC_DN	0	0	28	55	0	0	0	0
GSE28237_FOLLICULAR_VS_EARLY_GC_BCELL_UP	0	0	23	56	0	0	0	0
GSE17721_LPS_VS_GARDIQUIMOD_1H_BMDC_DN	0	0	23	50	0	0	0	0
GSE37301_GRANULOCYTE_MONOCYTE_PROGENITOR_VS_RAG2_KO_NK_CELL_UP	0	0	24	50	0	0	0	0
GSE5589_UNSTIM_VS_180MIN_LPS_AND_IL10_STIM_MACROPHAGE_UP	0	0	23	50	0	0	0	0
GSE17721_LPS_VS_POLYIC_4H_BMDC_UP	0	0	24	50	0	0	0	0
GSE27291_0H_VS_7D_STIM_GAMMADELTA_TCELL_DN	0	0	23	50	0	0	0	0
GSE36476_CTRL_VS_TSST_ACT_16H_MEMORY_CD4_TCELL_YOUNG_UP	0	0	23	56	0	0	0	0
GSE16522_MEMORY_VS_NAIVE_CD8_TCELL_DN	0	0	23	50	0	0	0	0
GSE13493_DP_VS_CD8POS_THYMOCYTE_UP	0	0	23	50	0	0	0	17
GSE7348_LPS_VS_TOLERIZED_AND_LPS_STIM_MACROPHAGE_UP	0	0	23	50	0	0	0	0
MICB	0	0	28	55	0	0	0	0
GSE36476_CTRL_VS_TSST_ACT_40H_MEMORY_CD4_TCELL_YOUNG_UP	0	0	23	56	0	0	0	0
GALC	0	0	23	64	0	0	0	0
GSE37301_MULTIPOTENT_PROGENITOR_VS_PRO_BCELL_DN	0	0	23	50	0	0	0	0
GSE7548_NAIVE_VS_DAY28_PCC_IMMUNIZATION_CD4_TCELL_UP	0	0	28	55	0	0	0	0
GSE34156_NOD2_LIGAND_VS_NOD2_AND_TLR1_TLR2_LIGAND_6H_TREATED_MONOCYTE_DN	0	0	23	50	0	0	0	17
GSE42021_CD24HI_VS_CD24LOW_TREG_THYMUS_DN	0	0	23	50	0	0	0	0
GSE5589_UNSTIM_VS_180MIN_LPS_STIM_MACROPHAGE_UP	0	0	23	50	0	0	0	0
GSE42021_TCONV_PLN_VS_CD24INT_TCONV_THYMUS_UP	0	0	23	50	0	0	0	0
GSE20366_CD103_POS_VS_CD103_KLRG1_DP_TREG_DN	0	0	23	50	0	0	0	0
GSE17721_POLYIC_VS_PAM3CSK4_24H_BMDC_DN	0	0	23	50	0	0	0	0
GSE42021_CD24INT_VS_CD24LOW_TCONV_THYMUS_DN	0	0	29	50	0	0	0	0
GSE2706_2H_VS_8H_R848_STIM_DC_DN	0	0	23	50	0	0	0	0
GSE19888_ADENOSINE_A3R_INH_PRETREAT_AND_ACT_BY_A3R_VS_A3R_INH_AND_TCELL_MEMBRANES_ACT_MAST_CELL_UP	0	0	23	50	0	0	0	0
GSE37534_UNTREATED_VS_ROSIGLITAZONE_TREATED_CD4_TCELL_PPARG1_AND_FOXP3_TRASDUCED_DN	0	0	23	50	0	0	0	0
GSE24142_ADULT_VS_FETAL_EARLY_THYMIC_PROGENITOR_UP	0	0	23	50	0	0	0	0
GSE1112_OT1_CD8AB_VS_HY_CD8AA_THYMOCYTE_RTOC_CULTURE_DN	0	0	23	50	0	0	0	0
GSE26030_UNSTIM_VS_RESTIM_TH1_DAY5_POST_POLARIZATION_UP	0	0	23	50	0	0	0	0
GSE21670_TGFB_VS_TGFB_AND_IL6_TREATED_STAT3_KO_CD4_TCELL_UP	0	0	23	58	0	0	0	0
P53_DN.V2_UP	0	0	45	0	0	0	54	0
GCNP_SHH_UP_LATE.V1_UP	0	0	23	50	0	0	0	0
MODULE_303	0	0	0	7	0	0	0	0
HALLMARK_COMPLEMENT	0	0	0	50	0	0	0	0
GSE22432_PDC_VS_TGFB1_TREATEDCOMMON_DC_PROGENITOR_DN	0	0	0	56	0	0	0	0
GSE27434_WT_VS_DNMT1_KO_TREG_DN	0	0	0	63	0	0	0	0
GSE43863_TH1_VS_TFH_EFFECTOR_CD4_TCELL_DN	0	0	0	50	0	0	0	0
GSE7348_UNSTIM_VS_LPS_STIM_MACROPHAGE_DN	0	0	0	50	0	0	0	0
GSE9650_GP33_VS_GP276_LCMV_SPECIFIC_EXHAUSTED_CD8_TCELL_DN	0	0	0	50	0	0	0	0
GSE43955_10H_VS_60H_ACT_CD4_TCELL_DN	0	0	0	50	0	0	0	0
GSE29618_BCELL_VS_PDC_DAY7_FLU_VACCINE_UP	0	0	0	50	0	0	0	0
GSE13485_CTRL_VS_DAY3_YF17D_VACCINE_PBMC_UP	0	0	0	50	0	0	0	0
GSE15330_MEGAKARYOCYTE_ERYTHROID_VS_GRANULOCYTE_MONOCYTE_PROGENITOR_IKAROS_KO_DN	0	0	0	50	0	0	0	0
GSE15330_HSC_VS_MEGAKARYOCYTE_ERYTHROID_PROGENITOR_IKAROS_KO_UP	0	0	0	50	0	0	0	0
GSE37605_C57BL6_VS_NOD_FOXP3_FUSION_GFP_TCONV_DN	0	0	0	50	0	0	0	0
GSE37301_MULTIPOTENT_PROGENITOR_VS_COMMON_LYMPHOID_PROGENITOR_DN	0	0	0	50	0	0	0	0
GSE13485_PRE_VS_POST_YF17D_VACCINATION_PBMC_UP	0	0	0	50	0	0	0	0
NAKAYA_MYELOID_DENDRITIC_CELL_FLUMIST_AGE_18_50YO_7DY_DN	0	0	0	58	0	0	0	0
GSE28237_FOLLICULAR_VS_LATE_GC_BCELL_DN	0	0	0	50	0	0	0	0
GSE18791_CTRL_VS_NEWCASTLE_VIRUS_DC_12H_UP	0	0	0	7	0	0	0	0
GSE22432_MULTIPOTENT_VS_COMMON_DC_PROGENITOR_UNTREATED_DN	0	0	0	14	0	0	0	0
DEAF1	0	0	0	0	9	0	0	0
MORF_PAPSS1	0	0	0	0	9	0	0	0
GGCT	0	0	0	0	9	0	0	0
DDOST	0	0	0	0	9	0	0	0
FAM168B	0	0	0	0	9	0	0	0
EIF3H	0	0	0	0	9	0	0	0
TGFB1	0	0	0	0	7	0	0	0
MORF_MAP2K2	0	0	0	0	9	0	0	0
CSK	0	0	0	0	9	0	0	0
RFC3	0	0	0	0	7	0	0	0
MORF_CCNI	0	0	0	0	9	0	0	0
SULT4A1	0	0	0	0	7	0	0	0
DUT	0	0	0	0	4	0	0	0
DNAJC8	0	0	0	0	4	0	0	0
EIF3G	0	0	0	0	5	0	0	0
EMP3	0	0	0	0	4	0	0	0
COMT	0	0	0	0	4	0	0	0
FGFR1	0	0	0	0	4	0	0	0
MORF_ESPL1	0	0	0	0	4	0	0	0
MORF_CDC10	0	0	0	0	4	0	0	0
DDX49	0	0	0	0	4	0	0	0
DRG1	0	0	0	0	5	0	0	0
FBP1	0	0	0	0	4	0	0	0
COX7C	0	0	0	0	5	0	0	0
FCER1G	0	0	0	0	4	0	0	0
CNIH1	0	0	0	0	4	0	0	0
EPOR	0	0	0	0	4	0	0	0
DDX39A	0	0	0	0	4	0	0	0
FADS2	0	0	0	0	4	0	0	0
DDX18	0	0	0	0	4	0	0	0
GSE26928_EFF_MEMORY_VS_CXCR5_POS_CD4_TCELL_UP	0	0	0	0	9	0	0	0
GSE12963_ENV_NEF_VS_ENV_NEF_AND_VPR_DEFICIENT_HIV1_INF_CD4_TCELL_UP	0	0	0	0	7	0	0	0
GSE21380_TFH_VS_GERMINAL_CENTER_TFH_CD4_TCELL_DN	0	0	0	0	10	0	0	0
GSE9988_ANTI_TREM1_AND_LPS_VS_CTRL_TREATED_MONOCYTES_DN	0	0	0	0	9	0	0	0
GSE22589_HIV_VS_HIV_AND_SIV_INFECTED_DC_DN	0	0	0	0	7	0	0	0
FPR2	0	0	0	0	9	0	0	0
GSE9988_ANTI_TREM1_AND_LPS_VS_VEHICLE_TREATED_MONOCYTES_DN	0	0	0	0	9	0	0	0
GSE9988_ANTI_TREM1_VS_VEHICLE_TREATED_MONOCYTES_DN	0	0	0	0	9	0	0	0
GSE21033_3H_VS_24H_POLYIC_STIM_DC_DN	0	0	0	0	5	0	0	0
GSE6090_UNSTIM_VS_DC_SIGN_STIM_DC_UP	0	0	0	0	6	0	0	0
GSE17974_0H_VS_4H_IN_VITRO_ACT_CD4_TCELL_DN	0	0	0	0	7	0	0	0
GSE22229_UNTREATED_VS_IMMUNOSUPP_THERAPY_RENAL_TRANSPLANT_PATIENT_PBMC_UP	0	0	0	0	7	0	0	0
GARCIA_PINERES_PBMC_HPV_16_L1_VLP_AGE_18_25YO_12MO_CORRELATED_WITH_ANTIBODY_RESPONSE_NEGATIVE	0	0	0	0	4	0	0	0
GARCIA_PINERES_PBMC_HPV_16_L1_VLP_AGE_18_25YO_7MO_CORRELATED_WITH_ANTIBODY_RESPONSE_NEGATIVE	0	0	0	0	4	0	0	0
GSE17721_LPS_VS_PAM3CSK4_4H_BMDC_DN	0	0	0	0	7	0	0	0
GSE3982_BASOPHIL_VS_TH1_DN	0	0	0	0	7	0	0	0
GSE33162_UNTREATED_VS_4H_LPS_STIM_HDAC3_KO_MACROPHAGE_UP	0	0	0	0	9	0	0	0
GSE40685_NAIVE_CD4_TCELL_VS_TREG_UP	0	0	0	0	7	0	0	0
GSE17974_CTRL_VS_ACT_IL4_AND_ANTI_IL12_4H_CD4_TCELL_DN	0	0	0	0	7	0	0	0
GSE14908_ATOPIC_VS_NONATOPIC_PATIENT_RESTING_CD4_TCELL_DN	0	0	0	0	7	0	0	0
GSE17974_IL4_AND_ANTI_IL12_VS_UNTREATED_0.5H_ACT_CD4_TCELL_DN	0	0	0	0	7	0	0	0
GSE11864_CSF1_VS_CSF1_PAM3CYS_IN_MAC_DN	0	0	0	0	7	0	0	0
GSE3039_ALPHABETA_CD8_TCELL_VS_B2_BCELL_UP	0	0	0	0	6	0	0	0
GSE11864_UNTREATED_VS_CSF1_PAM3CYS_IN_MAC_DN	0	0	0	0	7	0	0	0
GSE14415_INDUCED_TREG_VS_TCONV_UP	0	0	0	0	7	0	0	0
GSE12198_CTRL_VS_LOW_IL2_STIM_NK_CELL_DN	0	0	0	0	7	0	0	0
GSE11961_MEMORY_BCELL_DAY40_VS_GERMINAL_CENTER_BCELL_DAY40_UP	0	0	0	0	5	0	0	0
RPSA	0	0	0	0	0	0	0	9
MODULE_127	0	0	0	0	0	0	0	9
PRRX2	0	0	0	0	0	0	0	9
MYT1	0	0	0	0	0	0	0	9
PSMD12	0	0	0	0	0	0	0	9
GSE6092_UNSTIM_VS_IFNG_STIM_ENDOTHELIAL_CELL_DN	0	0	0	0	0	0	0	17
GSE7219_UNSTIM_VS_LPS_AND_ANTI_CD40_STIM_NIK_NFKB2_KO_DC_UP	0	0	0	0	0	0	0	17
GSE45365_CD8A_DC_VS_CD11B_DC_IFNAR_KO_DN	0	0	0	0	0	0	0	17
GSE36826_NORMAL_VS_STAPH_AUREUS_INF_IL1R_KO_SKIN_DN	0	0	0	0	0	0	0	25
GSE32423_MEMORY_VS_NAIVE_CD8_TCELL_IL7_UP	0	0	0	0	0	0	0	17
GSE17721_CTRL_VS_PAM3CSK4_0.5H_BMDC_DN	0	0	0	0	0	0	0	17
GSE41867_LCMV_ARMSTRONG_VS_CLONE13_DAY8_EFFECTOR_CD8_TCELL_DN	0	0	0	0	0	0	0	17
GSE7852_LN_VS_FAT_TCONV_UP	0	0	0	0	0	0	0	9
GSE33292_DN3_THYMOCYTE_VS_TCELL_LYMPHOMA_FROM_TCF1_KO_UP	0	0	0	0	0	0	0	17
GSE2770_TGFB_AND_IL4_VS_IL4_TREATED_ACT_CD4_TCELL_6H_DN	0	0	0	0	0	0	0	17
GSE7568_CTRL_VS_3H_TGFB_TREATED_MACROPHAGES_WITH_IL4_AND_DEXAMETHASONE_DN	0	0	0	0	0	0	0	17
ERWIN_COHEN_BLOOD_LIVE_VACCINE_TC_83_AGE_23_48YO_VACCINATED_VS_CONTROL_14DY_UP	0	0	0	0	0	0	0	17
GSE17580_TREG_VS_TEFF_S_MANSONI_INF_DN	0	0	0	0	0	0	0	17
GSE12839_CTRL_VS_IL12_TREATED_PBMC_UP	0	0	0	0	0	0	0	17
GSE45365_HEALTHY_VS_MCMV_INFECTION_CD8A_DC_IFNAR_KO_DN	0	0	0	0	0	0	0	25
GSE4748_LPS_VS_LPS_AND_CYANOBACTERIUM_LPSLIKE_STIM_DC_3H_UP	0	0	0	0	0	0	0	17
NAKAYA_PBMC_FLUARIX_FLUVIRIN_AGE_18_50YO_7DY_UP	0	0	0	0	0	0	0	17
GSE22886_IGG_IGA_MEMORY_BCELL_VS_BM_PLASMA_CELL_DN	0	0	0	0	0	0	0	17
GSE13522_CTRL_VS_T_CRUZI_Y_STRAIN_INF_SKIN_IFNG_KO_UP	0	0	0	0	0	0	0	17
GSE21927_SPLEEN_VS_BONE_MARROW_MONOCYTE_BALBC_DN	0	0	0	0	0	0	0	17
GSE25088_WT_VS_STAT6_KO_MACROPHAGE_ROSIGLITAZONE_STIM_UP	0	0	0	0	0	0	0	17
GSE41867_DAY6_VS_DAY8_LCMV_CLONE13_EFFECTOR_CD8_TCELL_DN	0	0	0	0	0	0	0	17
GSE26928_NAIVE_VS_EFF_MEMORY_CD4_TCELL_DN	0	0	0	0	0	0	0	17
GSE11973_MIR223_KOVS_WT_BONE_MARROW_NEUTROPHIL_UP	0	0	0	0	0	0	0	17
GSE22886_IL2_VS_IL15_STIM_NKCELL_DN	0	0	0	0	0	0	0	17
GSE21033_3H_VS_24H_POLYIC_STIM_DC_UP	0	0	0	0	0	0	0	9
GSE17721_0.5H_VS_12H_CPG_BMDC_UP	0	0	0	0	0	0	0	15
GSE41867_LCMV_ARMSTRONG_VS_CLONE13_DAY8_EFFECTOR_CD8_TCELL_UP	0	0	0	0	0	0	0	17
GSE12484_HEALTHY_VS_PERIDONTITIS_NEUTROPHILS_DN	0	0	0	0	0	0	0	17
GSE17721_POLYIC_VS_PAM3CSK4_0.5H_BMDC_DN	0	0	0	0	0	0	0	17
GSE40274_FOXP3_VS_FOXP3_AND_IRF4_TRANSDUCED_ACTIVATED_CD4_TCELL_UP	0	0	0	0	0	0	0	17
GSE36888_STAT5_AB_KNOCKIN_VS_WT_TCELL_IL2_TREATED_6H_UP	0	0	0	0	0	0	0	17
GSE27786_CD8_TCELL_VS_ERYTHROBLAST_UP	0	0	0	0	0	0	0	17
GSE16450_CTRL_VS_IFNA_12H_STIM_IMMATURE_NEURON_CELL_LINE_UP	0	0	0	0	0	0	0	17
GSE2405_0H_VS_1.5H_A_PHAGOCYTOPHILUM_STIM_NEUTROPHIL_DN	0	0	0	0	0	0	0	9
GSE17721_POLYIC_VS_CPG_0.5H_BMDC_UP	0	0	0	0	0	0	0	15
GSE21360_NAIVE_VS_QUATERNARY_MEMORY_CD8_TCELL_DN	0	0	0	0	0	0	0	17
GSE17721_POLYIC_VS_PAM3CSK4_8H_BMDC_UP	0	0	0	0	0	0	0	17
GSE13493_DP_VS_CD4INTCD8POS_THYMOCYTE_UP	0	0	0	0	0	0	0	17
GSE2128_C57BL6_VS_NOD_CD4CD8_DP_THYMOCYTE_UP	0	0	0	0	0	0	0	17
GSE17721_0.5H_VS_4H_POLYIC_BMDC_DN	0	0	0	0	0	0	0	17

## Sheet: Pathway List
Name	PathType	n
GNF2_BUB3	computational_out.txt	6
IRF8	computational_out.txt	6
MODULE_458	computational_out.txt	6
MYCN	computational_out.txt	6
PTTG2	computational_out.txt	6
RCSD1	computational_out.txt	6
SLBP	computational_out.txt	6
SMG7	computational_out.txt	6
SNRPB2	computational_out.txt	6
SP140L	computational_out.txt	6
SSBP4	computational_out.txt	6
SUGP2	computational_out.txt	6
SUSD4	computational_out.txt	6
TIMP4	computational_out.txt	6
TMED3	computational_out.txt	6
TMEM161A	computational_out.txt	6
TMEM248	computational_out.txt	6
GSE12366_GC_BCELL_VS_PLASMA_CELL_UP	immunologic_out.txt	5
GSE20198_IL12_VS_IFNA_TREATED_ACT_CD4_TCELL_UP	immunologic_out.txt	5
GSE6259_BCELL_VS_CD4_TCELL_UP	immunologic_out.txt	5
HALLMARK_DNA_REPAIR	hallmark_out.txt	5
NAKAYA_PBMC_FLUMIST_AGE_18_50YO_7DY_IFN_SUBSET_UP	immunologic_out.txt	5
GSE11961_MARGINAL_ZONE_BCELL_VS_PLASMA_CELL_DAY7_UP	immunologic_out.txt	4
GSE15659_NAIVE_CD4_TCELL_VS_RESTING_TREG_DN	immunologic_out.txt	4
GSE17721_0.5H_VS_4H_LPS_BMDC_UP	immunologic_out.txt	4
GSE20500_CTRL_VS_RARA_ANTAGONIST_TREATED_CD4_TCELL_DN	immunologic_out.txt	4
GSE21670_UNTREATED_VS_IL6_TREATED_STAT3_KO_CD4_TCELL_DN	immunologic_out.txt	4
GSE21927_SPLEEN_C57BL6_VS_EL4_TUMOR_BALBC_MONOCYTES_UP	immunologic_out.txt	4
GSE25088_CTRL_VS_ROSIGLITAZONE_STIM_STAT6_KO_MACROPHAGE_UP	immunologic_out.txt	4
GSE27291_0H_VS_6H_STIM_GAMMADELTA_TCELL_UP	immunologic_out.txt	4
GSE37301_MULTIPOTENT_PROGENITOR_VS_RAG2_KO_NK_CELL_DN	immunologic_out.txt	4
KAECH_DAY15_EFF_VS_MEMORY_CD8_TCELL_DN	immunologic_out.txt	4
TCTN1	computational_out.txt	4
BUCASAS_PBMC_FLUARIX_FLUVIRIN_CAUCASIAN_MALE_AGE_18_40YO_LOW_RESPONDERS_1DY_POSITIVE_PREDICTIVE_OF_TITER	immunologic_out.txt	3
GSE1112_OT1_VS_HY_CD8AB_THYMOCYTE_RTOC_CULTURE_UP	immunologic_out.txt	3
GSE13493_DP_VS_CD8POS_THYMOCYTE_UP	immunologic_out.txt	3
GSE15659_CD45RA_NEG_CD4_TCELL_VS_RESTING_TREG_DN	immunologic_out.txt	3
GSE17301_CTRL_VS_48H_ACD3_ACD28_STIM_CD8_TCELL_UP	immunologic_out.txt	3
GSE20152_SPHK1_KO_VS_HTNFA_OVEREXPRESS_ANKLE_DN	immunologic_out.txt	3
GSE21033_1H_VS_12H_POLYIC_STIM_DC_DN	immunologic_out.txt	3
GSE21063_CTRL_VS_ANTI_IGM_STIM_BCELL_NFATC1_KO_3H_DN	immunologic_out.txt	3
GSE21063_CTRL_VS_ANTI_IGM_STIM_BCELL_NFATC1_KO_8H_UP	immunologic_out.txt	3
GSE21360_PRIMARY_VS_QUATERNARY_MEMORY_CD8_TCELL_DN	immunologic_out.txt	3
GSE21670_STAT3_KO_VS_WT_CD4_TCELL_DN	immunologic_out.txt	3
GSE21927_SPLENIC_VS_TUMOR_MONOCYTES_FROM_C26GM_TUMOROUS_MICE_BALBC_DN	immunologic_out.txt	3
GSE22033_UNTREATED_VS_ROSIGLITAZONE_TREATED_MEF_UP	immunologic_out.txt	3
GSE25088_CTRL_VS_IL4_AND_ROSIGLITAZONE_STIM_MACROPHAGE_UP	immunologic_out.txt	3
GSE2706_UNSTIM_VS_2H_R848_DC_UP	immunologic_out.txt	3
GSE27786_LIN_NEG_VS_NEUTROPHIL_DN	immunologic_out.txt	3
GSE34156_NOD2_LIGAND_VS_NOD2_AND_TLR1_TLR2_LIGAND_6H_TREATED_MONOCYTE_DN	immunologic_out.txt	3
GSE3982_BASOPHIL_VS_TH2_DN	immunologic_out.txt	3
GSE45365_WT_VS_IFNAR_KO_CD8A_DC_MCMV_INFECTION_UP	immunologic_out.txt	3
GSE46606_DAY1_VS_DAY3_CD40L_IL2_IL5_STIMULATED_IRF4_KO_BCELL_UP	immunologic_out.txt	3
GSE6681_DELETED_FOXP3_VS_WT_TREG_DN	immunologic_out.txt	3
GSE8921_UNSTIM_VS_TLR1_2_STIM_MONOCYTE_6H_UP	immunologic_out.txt	3
GSE9650_EFFECTOR_VS_MEMORY_CD8_TCELL_DN	immunologic_out.txt	3
HALLMARK_E2F_TARGETS	hallmark_out.txt	3
HALLMARK_P53_PATHWAY	hallmark_out.txt	3
HALLMARK_WNT_BETA_CATENIN_SIGNALING	hallmark_out.txt	3
KAECH_DAY8_EFF_VS_MEMORY_CD8_TCELL_DN	immunologic_out.txt	3
OXNAD1	immunologic_out.txt	3
AKT_UP_MTOR_DN.V1_UP	oncogenic_out.txt	2
BRCA1_DN.V1_DN	oncogenic_out.txt	2
E2F1_UP.V1_UP	oncogenic_out.txt	2
GALC	immunologic_out.txt	2
GAVISH_3CA_MALIGNANT_METAPROGRAM_4_CHROMATIN	computational_out.txt	2
GAVISH_3CA_METAPROGRAM_CD4_T_CELLS_NAIVE_2	computational_out.txt	2
GAVISH_3CA_METAPROGRAM_CD8_T_CELLS_NAIVE_2	computational_out.txt	2
GAVISH_3CA_METAPROGRAM_CD8_T_CELLS_NAIVE_3	computational_out.txt	2
GCNP_SHH_UP_LATE.V1_UP	oncogenic_out.txt	2
GNF2_DDX5	computational_out.txt	2
GSE10239_NAIVE_VS_MEMORY_CD8_TCELL_UP	immunologic_out.txt	2
GSE10273_HIGH_VS_LOW_IL7_TREATED_IRF4_8_NULL_PRE_BCELL_DN	immunologic_out.txt	2
GSE10273_LOW_IL7_VS_HIGH_IL7_AND_IRF4_IN_IRF4_8_NULL_PRE_BCELL_DN	immunologic_out.txt	2
GSE11057_CD4_CENT_MEM_VS_PBMC_UP	immunologic_out.txt	2
GSE1112_OT1_CD8AB_VS_HY_CD8AA_THYMOCYTE_RTOC_CULTURE_DN	immunologic_out.txt	2
GSE12003_4D_VS_8D_CULTURE_BM_PROGENITOR_DN	immunologic_out.txt	2
GSE12366_PLASMA_CELL_VS_NAIVE_BCELL_DN	immunologic_out.txt	2
GSE12505_WT_VS_E2_2_HET_PDC_DN	immunologic_out.txt	2
GSE12845_IGD_POS_BLOOD_VS_NAIVE_TONSIL_BCELL_UP	immunologic_out.txt	2
GSE13411_IGM_MEMORY_BCELL_VS_PLASMA_CELL_UP	immunologic_out.txt	2
GSE14000_UNSTIM_VS_16H_LPS_DC_TRANSLATED_RNA_UP	immunologic_out.txt	2
GSE14026_TH1_VS_TH17_UP	immunologic_out.txt	2
GSE14308_TH1_VS_NAIVE_CD4_TCELL_DN	immunologic_out.txt	2
GSE14308_TH2_VS_TH17_DN	immunologic_out.txt	2
GSE14308_TH2_VS_TH1_DN	immunologic_out.txt	2
GSE15215_CD2_POS_VS_NEG_PDC_DN	immunologic_out.txt	2
GSE15659_CD45RA_NEG_CD4_TCELL_VS_NONSUPPRESSIVE_TCELL_DN	immunologic_out.txt	2
GSE1566_WT_VS_EZH2_KO_LN_TCELL_DN	immunologic_out.txt	2
GSE16385_MONOCYTE_VS_12H_ROSIGLITAZONE_IL4_TREATED_MACROPHAGE_DN	immunologic_out.txt	2
GSE16450_CTRL_VS_IFNA_6H_STIM_MATURE_NEURON_CELL_LINE_DN	immunologic_out.txt	2
GSE16522_MEMORY_VS_NAIVE_CD8_TCELL_DN	immunologic_out.txt	2
GSE17186_NAIVE_VS_CD21LOW_TRANSITIONAL_BCELL_UP	immunologic_out.txt	2
GSE17301_ACD3_ACD28_VS_ACD3_ACD28_AND_IFNA2_STIM_CD8_TCELL_DN	immunologic_out.txt	2
GSE17301_CTRL_VS_48H_IFNA2_STIM_CD8_TCELL_UP	immunologic_out.txt	2
GSE17721_CTRL_VS_CPG_0.5H_BMDC_UP	immunologic_out.txt	2
GSE17721_CTRL_VS_CPG_6H_BMDC_UP	immunologic_out.txt	2
GSE17721_CTRL_VS_GARDIQUIMOD_6H_BMDC_UP	immunologic_out.txt	2
GSE17721_CTRL_VS_PAM3CSK4_4H_BMDC_UP	immunologic_out.txt	2
GSE17721_LPS_VS_GARDIQUIMOD_1H_BMDC_DN	immunologic_out.txt	2
GSE17721_LPS_VS_POLYIC_4H_BMDC_UP	immunologic_out.txt	2
GSE17721_POLYIC_VS_CPG_2H_BMDC_UP	immunologic_out.txt	2
GSE17721_POLYIC_VS_PAM3CSK4_24H_BMDC_DN	immunologic_out.txt	2
GSE17721_POLYIC_VS_PAM3CSK4_2H_BMDC_UP	immunologic_out.txt	2
GSE1791_CTRL_VS_NEUROMEDINU_IN_T_CELL_LINE_0.8H_UP	immunologic_out.txt	2
GSE17974_0H_VS_1H_IN_VITRO_ACT_CD4_TCELL_DN	immunologic_out.txt	2
GSE17974_1.5H_VS_72H_IL4_AND_ANTI_IL12_ACT_CD4_TCELL_UP	immunologic_out.txt	2
GSE17974_2H_VS_72H_UNTREATED_IN_VITRO_CD4_TCELL_UP	immunologic_out.txt	2
GSE17974_CTRL_VS_ACT_IL4_AND_ANTI_IL12_12H_CD4_TCELL_DN	immunologic_out.txt	2
GSE17974_CTRL_VS_ACT_IL4_AND_ANTI_IL12_2H_CD4_TCELL_DN	immunologic_out.txt	2
GSE17974_IL4_AND_ANTI_IL12_VS_UNTREATED_2H_ACT_CD4_TCELL_UP	immunologic_out.txt	2
GSE17974_IL4_AND_ANTI_IL12_VS_UNTREATED_48H_ACT_CD4_TCELL_DN	immunologic_out.txt	2
GSE18791_UNSTIM_VS_NEWCATSLE_VIRUS_DC_10H_UP	immunologic_out.txt	2
GSE19198_1H_VS_24H_IL21_TREATED_TCELL_DN	immunologic_out.txt	2
GSE19401_NAIVE_VS_IMMUNIZED_MOUSE_PLN_FOLLICULAR_DC_DN	immunologic_out.txt	2
GSE19888_ADENOSINE_A3R_INH_PRETREAT_AND_ACT_BY_A3R_VS_A3R_INH_AND_TCELL_MEMBRANES_ACT_MAST_CELL_UP	immunologic_out.txt	2
GSE20152_SPHK1_KO_VS_WT_HTNFA_OVERXPRESS_ANKLE_DN	immunologic_out.txt	2
GSE20198_UNTREATED_VS_IFNA_TREATED_ACT_CD4_TCELL_UP	immunologic_out.txt	2
GSE20198_UNTREATED_VS_IL12_TREATED_ACT_CD4_TCELL_DN	immunologic_out.txt	2
GSE20366_CD103_POS_VS_CD103_KLRG1_DP_TREG_DN	immunologic_out.txt	2
GSE20366_EX_VIVO_VS_DEC205_CONVERSION_NAIVE_CD4_TCELL_DN	immunologic_out.txt	2
GSE20500_CTRL_VS_RETINOIC_ACID_TREATED_CD4_TCELL_UP	immunologic_out.txt	2
GSE21033_CTRL_VS_POLYIC_STIM_DC_12H_DN	immunologic_out.txt	2
GSE21033_CTRL_VS_POLYIC_STIM_DC_3H_UP	immunologic_out.txt	2
GSE2128_CTRL_VS_MIMETOPE_NEGATIVE_SELECTION_DP_THYMOCYTE_NOD_DN	immunologic_out.txt	2
GSE21670_TGFB_VS_TGFB_AND_IL6_TREATED_CD4_TCELL_DN	immunologic_out.txt	2
GSE21670_TGFB_VS_TGFB_AND_IL6_TREATED_STAT3_KO_CD4_TCELL_UP	immunologic_out.txt	2
GSE21927_C26GM_VS_4T1_TUMOR_MONOCYTE_BALBC_DN	immunologic_out.txt	2
GSE22103_UNSTIM_VS_LPS_STIM_NEUTROPHIL_UP	immunologic_out.txt	2
GSE22282_HYPOXIA_VS_NORMOXIA_MYELOID_DC_UP	immunologic_out.txt	2
GSE22527_ANTI_CD3_INVIVO_VS_UNTREATED_MOUSE_TREG_DN	immunologic_out.txt	2
GSE22601_IMMATURE_CD4_SINGLE_POSITIVE_VS_CD4_SINGLE_POSITIVE_THYMOCYTE_DN	immunologic_out.txt	2
GSE22886_UNSTIM_VS_IL2_STIM_NKCELL_DN	immunologic_out.txt	2
GSE23308_CTRL_VS_CORTICOSTERONE_TREATED_MACROPHAGE_MINERALCORTICOID_REC_KO_UP	immunologic_out.txt	2
GSE24026_PD1_LIGATION_VS_CTRL_IN_ACT_TCELL_LINE_DN	immunologic_out.txt	2
GSE24026_PD1_LIGATION_VS_CTRL_IN_ACT_TCELL_LINE_UP	immunologic_out.txt	2
GSE2405_0H_VS_6H_A_PHAGOCYTOPHILUM_STIM_NEUTROPHIL_UP	immunologic_out.txt	2
GSE2405_0H_VS_9H_A_PHAGOCYTOPHILUM_STIM_NEUTROPHIL_UP	immunologic_out.txt	2
GSE24142_ADULT_VS_FETAL_EARLY_THYMIC_PROGENITOR_UP	immunologic_out.txt	2
GSE24210_RESTING_TREG_VS_TCONV_UP	immunologic_out.txt	2
GSE24574_BCL6_LOW_TFH_VS_TCONV_CD4_TCELL_DN	immunologic_out.txt	2
GSE24671_CTRL_VS_SENDAI_VIRUS_INFECTED_MOUSE_SPLENOCYTES_DN	immunologic_out.txt	2
GSE25087_FETAL_VS_ADULT_TCONV_UP	immunologic_out.txt	2
GSE25088_CTRL_VS_ROSIGLITAZONE_STIM_STAT6_KO_MACROPHAGE_DN	immunologic_out.txt	2
GSE25123_CTRL_VS_IL4_AND_ROSIGLITAZONE_STIM_MACROPHAGE_UP	immunologic_out.txt	2
GSE25123_ROSIGLITAZONE_VS_IL4_AND_ROSIGLITAZONE_STIM_PPARG_KO_MACROPHAGE_DAY10_UP	immunologic_out.txt	2
GSE26030_UNSTIM_VS_RESTIM_TH1_DAY5_POST_POLARIZATION_UP	immunologic_out.txt	2
GSE26156_DOUBLE_POSITIVE_VS_CD4_SINGLE_POSITIVE_THYMOCYTE_DN	immunologic_out.txt	2
GSE26928_NAIVE_VS_CXCR5_POS_CD4_TCELL_DN	immunologic_out.txt	2
GSE2706_2H_VS_8H_R848_STIM_DC_DN	immunologic_out.txt	2
GSE27291_0H_VS_7D_STIM_GAMMADELTA_TCELL_DN	immunologic_out.txt	2
GSE2770_IL12_AND_TGFB_ACT_VS_ACT_CD4_TCELL_2H_UP	immunologic_out.txt	2
GSE2770_IL12_AND_TGFB_ACT_VS_ACT_CD4_TCELL_48H_UP	immunologic_out.txt	2
GSE2770_IL4_ACT_VS_ACT_CD4_TCELL_2H_DN	immunologic_out.txt	2
GSE2770_IL4_ACT_VS_ACT_CD4_TCELL_48H_DN	immunologic_out.txt	2
GSE2770_UNTREATED_VS_ACT_CD4_TCELL_2H_UP	immunologic_out.txt	2
GSE27786_BCELL_VS_CD8_TCELL_UP	immunologic_out.txt	2
GSE27786_LIN_NEG_VS_NKTCELL_DN	immunologic_out.txt	2
GSE27786_LSK_VS_NEUTROPHIL_DN	immunologic_out.txt	2
GSE27786_NKCELL_VS_NKTCELL_DN	immunologic_out.txt	2
GSE28237_FOLLICULAR_VS_EARLY_GC_BCELL_UP	immunologic_out.txt	2
GSE28726_NAIVE_CD4_TCELL_VS_NAIVE_VA24NEG_NKTCELL_UP	immunologic_out.txt	2
GSE29164_CD8_TCELL_VS_CD8_TCELL_AND_IL12_TREATED_MELANOMA_DAY7_UP	immunologic_out.txt	2
GSE29618_PRE_VS_DAY7_FLU_VACCINE_MONOCYTE_UP	immunologic_out.txt	2
GSE29618_PRE_VS_DAY7_POST_TIV_FLU_VACCINE_MONOCYTE_UP	immunologic_out.txt	2
GSE3039_B2_VS_B1_BCELL_DN	immunologic_out.txt	2
GSE31082_DN_VS_CD4_SP_THYMOCYTE_DN	immunologic_out.txt	2
GSE31082_DP_VS_CD4_SP_THYMOCYTE_DN	immunologic_out.txt	2
GSE33162_HDAC3_KO_VS_HDAC3_KO_4H_LPS_STIM_MACROPHAGE_UP	immunologic_out.txt	2
GSE339_CD4POS_VS_CD8POS_DC_UP	immunologic_out.txt	2
GSE339_CD8POS_VS_CD4CD8DN_DC_DN	immunologic_out.txt	2
GSE339_EX_VIVO_VS_IN_CULTURE_CD8POS_DC_DN	immunologic_out.txt	2
GSE35435_RESTING_VS_IL4_TREATED_MACROPHAGE_UP	immunologic_out.txt	2
GSE36009_UNSTIM_VS_LPS_STIM_DC_DN	immunologic_out.txt	2
GSE36009_WT_VS_NLRP10_KO_DC_DN	immunologic_out.txt	2
GSE360_CTRL_VS_M_TUBERCULOSIS_DC_UP	immunologic_out.txt	2
GSE360_LOW_DOSE_B_MALAYI_VS_M_TUBERCULOSIS_DC_UP	immunologic_out.txt	2
GSE360_L_MAJOR_VS_B_MALAYI_HIGH_DOSE_MAC_DN	immunologic_out.txt	2
GSE360_T_GONDII_VS_B_MALAYI_LOW_DOSE_MAC_DN	immunologic_out.txt	2
GSE36476_CTRL_VS_TSST_ACT_16H_MEMORY_CD4_TCELL_YOUNG_UP	immunologic_out.txt	2
GSE36476_CTRL_VS_TSST_ACT_40H_MEMORY_CD4_TCELL_YOUNG_UP	immunologic_out.txt	2
GSE36476_YOUNG_VS_OLD_DONOR_MEMORY_CD4_TCELL_40H_TSST_ACT_DN	immunologic_out.txt	2
GSE3691_CONVENTIONAL_VS_PLASMACYTOID_DC_SPLEEN_UP	immunologic_out.txt	2
GSE37301_GRANULOCYTE_MONOCYTE_PROGENITOR_VS_RAG2_KO_NK_CELL_UP	immunologic_out.txt	2
GSE37301_LYMPHOID_PRIMED_MPP_VS_GRAN_MONO_PROGENITOR_UP	immunologic_out.txt	2
GSE37301_LYMPHOID_PRIMED_MPP_VS_RAG2_KO_NK_CELL_UP	immunologic_out.txt	2
GSE37301_MULTIPOTENT_PROGENITOR_VS_PRO_BCELL_DN	immunologic_out.txt	2
GSE37534_UNTREATED_VS_ROSIGLITAZONE_TREATED_CD4_TCELL_PPARG1_AND_FOXP3_TRASDUCED_DN	immunologic_out.txt	2
GSE3920_IFNA_VS_IFNG_TREATED_FIBROBLAST_UP	immunologic_out.txt	2
GSE3982_EFF_MEMORY_CD4_TCELL_VS_TH2_DN	immunologic_out.txt	2
GSE3982_MAST_CELL_VS_MAC_UP	immunologic_out.txt	2
GSE40274_FOXP3_VS_FOXP3_AND_SATB1_TRANSDUCED_ACTIVATED_CD4_TCELL_DN	immunologic_out.txt	2
GSE40655_FOXO1_KO_VS_WT_NTREG_UP	immunologic_out.txt	2
GSE40666_STAT1_KO_VS_STAT4_KO_CD8_TCELL_WITH_IFNA_STIM_90MIN_UP	immunologic_out.txt	2
GSE40666_UNTREATED_VS_IFNA_STIM_CD8_TCELL_90MIN_DN	immunologic_out.txt	2
GSE411_UNSTIM_VS_100MIN_IL6_STIM_SOCS3_KO_MACROPHAGE_UP	immunologic_out.txt	2
GSE41867_DAY15_EFFECTOR_VS_DAY30_MEMORY_CD8_TCELL_LCMV_ARMSTRONG_UP	immunologic_out.txt	2
GSE41867_NAIVE_VS_DAY8_LCMV_ARMSTRONG_EFFECTOR_CD8_TCELL_DN	immunologic_out.txt	2
GSE41867_NAIVE_VS_EFFECTOR_CD8_TCELL_DN	immunologic_out.txt	2
GSE42021_CD24HI_TREG_VS_CD24HI_TCONV_THYMUS_UP	immunologic_out.txt	2
GSE42021_CD24HI_VS_CD24LOW_TREG_THYMUS_DN	immunologic_out.txt	2
GSE42021_CD24INT_VS_CD24LOW_TCONV_THYMUS_DN	immunologic_out.txt	2
GSE42021_TCONV_PLN_VS_CD24INT_TCONV_THYMUS_UP	immunologic_out.txt	2
GSE43863_LY6C_INT_CXCR5POS_VS_LY6C_LOW_CXCR5NEG_EFFECTOR_CD4_TCELL_UP	immunologic_out.txt	2
GSE43863_TFH_VS_LY6C_LOW_CXCR5NEG_EFFECTOR_CD4_TCELL_UP	immunologic_out.txt	2
GSE43955_1H_VS_42H_ACT_CD4_TCELL_WITH_TGFB_IL6_UP	immunologic_out.txt	2
GSE45365_HEALTHY_VS_MCMV_INFECTION_CD8A_DC_UP	immunologic_out.txt	2
GSE46468_LUNG_INNATE_LYMPHOID_CELL_VS_SPLEEN_CD4_TCELL_DN	immunologic_out.txt	2
GSE5463_CTRL_VS_DEXAMETHASONE_TREATED_THYMOCYTE_UP	immunologic_out.txt	2
GSE5503_PLN_DC_VS_SPLEEN_DC_ACTIVATED_ALLOGENIC_TCELL_DN	immunologic_out.txt	2
GSE5589_IL6_KO_VS_IL10_KO_LPS_AND_IL10_STIM_MACROPHAGE_45MIN_UP	immunologic_out.txt	2
GSE5589_UNSTIM_VS_180MIN_LPS_AND_IL10_STIM_MACROPHAGE_UP	immunologic_out.txt	2
GSE5589_UNSTIM_VS_180MIN_LPS_STIM_MACROPHAGE_UP	immunologic_out.txt	2
GSE5589_WT_VS_IL6_KO_LPS_STIM_MACROPHAGE_45MIN_DN	immunologic_out.txt	2
GSE5589_WT_VS_IL6_KO_LPS_STIM_MACROPHAGE_45MIN_UP	immunologic_out.txt	2
GSE6875_TCONV_VS_FOXP3_KO_TREG_DN	immunologic_out.txt	2
GSE7348_LPS_VS_TOLERIZED_AND_LPS_STIM_MACROPHAGE_UP	immunologic_out.txt	2
GSE7509_DC_VS_MONOCYTE_WITH_FCGRIIB_STIM_UP	immunologic_out.txt	2
GSE7548_NAIVE_VS_DAY28_PCC_IMMUNIZATION_CD4_TCELL_UP	immunologic_out.txt	2
GSE7768_OVA_ALONE_VS_OVA_WITH_LPS_IMMUNIZED_MOUSE_WHOLE_SPLEEN_6H_UP	immunologic_out.txt	2
GSE8621_UNSTIM_VS_LPS_STIM_MACROPHAGE_DN	immunologic_out.txt	2
GSE9006_HEALTHY_VS_TYPE_2_DIABETES_PBMC_AT_DX_UP	immunologic_out.txt	2
GSE9006_TYPE_1_VS_TYPE_2_DIABETES_PBMC_AT_DX_UP	immunologic_out.txt	2
GSE9650_NAIVE_VS_EFF_CD8_TCELL_UP	immunologic_out.txt	2
GSE9988_ANTI_TREM1_VS_CTRL_TREATED_MONOCYTES_DN	immunologic_out.txt	2
KAECH_NAIVE_VS_DAY8_EFF_CD8_TCELL_UP	immunologic_out.txt	2
MICB	immunologic_out.txt	2
MODULE_237	computational_out.txt	2
MODULE_280	computational_out.txt	2
P53_DN.V2_UP	oncogenic_out.txt	2
PDGF_ERK_DN.V1_DN	oncogenic_out.txt	2
SLAMF1	immunologic_out.txt	2
CNIH1	computational_out.txt	1
COMT	computational_out.txt	1
COX7C	computational_out.txt	1
CSK	computational_out.txt	1
DDOST	computational_out.txt	1
DDX18	computational_out.txt	1
DDX21	computational_out.txt	1
DDX39A	computational_out.txt	1
DDX49	computational_out.txt	1
DEAF1	computational_out.txt	1
DNAJC8	computational_out.txt	1
DRG1	computational_out.txt	1
DUT	computational_out.txt	1
EGFR_UP.V1_DN	oncogenic_out.txt	1
EIF3G	computational_out.txt	1
EIF3H	computational_out.txt	1
EMP3	computational_out.txt	1
EPOR	computational_out.txt	1
ERWIN_COHEN_BLOOD_LIVE_VACCINE_TC_83_AGE_23_48YO_VACCINATED_VS_CONTROL_14DY_UP	immunologic_out.txt	1
ESR1	computational_out.txt	1
EWSR1	computational_out.txt	1
FADS2	computational_out.txt	1
FAM168B	computational_out.txt	1
FBP1	computational_out.txt	1
FCER1G	computational_out.txt	1
FGF4	computational_out.txt	1
FGFR1	computational_out.txt	1
FPR2	immunologic_out.txt	1
GARCIA_PINERES_PBMC_HPV_16_L1_VLP_AGE_18_25YO_12MO_CORRELATED_WITH_ANTIBODY_RESPONSE_NEGATIVE	immunologic_out.txt	1
GARCIA_PINERES_PBMC_HPV_16_L1_VLP_AGE_18_25YO_7MO_CORRELATED_WITH_ANTIBODY_RESPONSE_NEGATIVE	immunologic_out.txt	1
GAVISH_3CA_MALIGNANT_METAPROGRAM_20_MYC	computational_out.txt	1
GAVISH_3CA_MALIGNANT_METAPROGRAM_22_SECRETED_1	computational_out.txt	1
GAVISH_3CA_MALIGNANT_METAPROGRAM_27_OLIGO_PROGENITOR	computational_out.txt	1
GAVISH_3CA_MALIGNANT_METAPROGRAM_33_RBCS	computational_out.txt	1
GAVISH_3CA_METAPROGRAM_B_CELLS_HSP_STRESS	computational_out.txt	1
GAVISH_3CA_METAPROGRAM_EPITHELIAL_MYC	computational_out.txt	1
GAVISH_3CA_METAPROGRAM_FIBROBLASTS_CAF_10	computational_out.txt	1
GAVISH_3CA_METAPROGRAM_FIBROBLASTS_CAF_7	computational_out.txt	1
GAVISH_3CA_METAPROGRAM_FIBROBLASTS_STRESS	computational_out.txt	1
GCM_SMO	computational_out.txt	1
GGCT	computational_out.txt	1
GJB1	computational_out.txt	1
GNF2_CD53	computational_out.txt	1
GNF2_HAT1	computational_out.txt	1
GNF2_VAV1	computational_out.txt	1
GNLY	computational_out.txt	1
GSE10211_UV_INACT_SENDAI_VS_LIVE_SENDAI_VIRUS_TRACHEAL_EPITHELIAL_CELLS_DN	immunologic_out.txt	1
GSE10239_MEMORY_VS_DAY4.5_EFF_CD8_TCELL_UP	immunologic_out.txt	1
GSE11057_CD4_EFF_MEM_VS_PBMC_UP	immunologic_out.txt	1
GSE11864_CSF1_VS_CSF1_PAM3CYS_IN_MAC_DN	immunologic_out.txt	1
GSE11864_UNTREATED_VS_CSF1_PAM3CYS_IN_MAC_DN	immunologic_out.txt	1
GSE11961_MEMORY_BCELL_DAY40_VS_GERMINAL_CENTER_BCELL_DAY40_UP	immunologic_out.txt	1
GSE11973_MIR223_KOVS_WT_BONE_MARROW_NEUTROPHIL_UP	immunologic_out.txt	1
GSE12198_CTRL_VS_LOW_IL2_STIM_NK_CELL_DN	immunologic_out.txt	1
GSE12484_HEALTHY_VS_PERIDONTITIS_NEUTROPHILS_DN	immunologic_out.txt	1
GSE12839_CTRL_VS_IL12_TREATED_PBMC_UP	immunologic_out.txt	1
GSE12845_IGD_NEG_BLOOD_VS_NAIVE_TONSIL_BCELL_DN	immunologic_out.txt	1
GSE12963_ENV_NEF_VS_ENV_NEF_AND_VPR_DEFICIENT_HIV1_INF_CD4_TCELL_UP	immunologic_out.txt	1
GSE13306_TREG_VS_TCONV_DN	immunologic_out.txt	1
GSE13306_TREG_VS_TCONV_SPLEEN_DN	immunologic_out.txt	1
GSE13411_NAIVE_VS_MEMORY_BCELL_DN	immunologic_out.txt	1
GSE13485_CTRL_VS_DAY3_YF17D_VACCINE_PBMC_UP	immunologic_out.txt	1
GSE13485_DAY1_VS_DAY21_YF17D_VACCINE_PBMC_DN	immunologic_out.txt	1
GSE13485_PRE_VS_POST_YF17D_VACCINATION_PBMC_UP	immunologic_out.txt	1
GSE13493_CD4INTCD8POS_VS_CD8POS_THYMOCYTE_UP	immunologic_out.txt	1
GSE13493_DP_VS_CD4INTCD8POS_THYMOCYTE_UP	immunologic_out.txt	1
GSE13522_CTRL_VS_T_CRUZI_Y_STRAIN_INF_SKIN_IFNG_KO_UP	immunologic_out.txt	1
GSE14000_4H_VS_16H_LPS_DC_DN	immunologic_out.txt	1
GSE14000_4H_VS_16H_LPS_DC_TRANSLATED_RNA_DN	immunologic_out.txt	1
GSE14000_4H_VS_16H_LPS_DC_TRANSLATED_RNA_UP	immunologic_out.txt	1
GSE14415_FOXP3_KO_NATURAL_TREG_VS_TCONV_DN	immunologic_out.txt	1
GSE14415_INDUCED_TREG_VS_FAILED_INDUCED_TREG_UP	immunologic_out.txt	1
GSE14415_INDUCED_TREG_VS_FOXP3_KO_INDUCED_TREG_UP	immunologic_out.txt	1
GSE14415_INDUCED_TREG_VS_TCONV_UP	immunologic_out.txt	1
GSE1460_CD4_THYMOCYTE_VS_NAIVE_CD4_TCELL_ADULT_BLOOD_UP	immunologic_out.txt	1
GSE1460_CORD_VS_ADULT_BLOOD_NAIVE_CD4_TCELL_UP	immunologic_out.txt	1
GSE1460_DP_THYMOCYTE_VS_NAIVE_CD4_TCELL_ADULT_BLOOD_DN	immunologic_out.txt	1
GSE1460_DP_THYMOCYTE_VS_THYMIC_STROMAL_CELL_DN	immunologic_out.txt	1
GSE1460_DP_VS_CD4_THYMOCYTE_DN	immunologic_out.txt	1
GSE14769_40MIN_VS_360MIN_LPS_BMDM_UP	immunologic_out.txt	1
GSE14908_ATOPIC_VS_NONATOPIC_PATIENT_RESTING_CD4_TCELL_DN	immunologic_out.txt	1
GSE15324_ELF4_KO_VS_WT_ACTIVATED_CD8_TCELL_DN	immunologic_out.txt	1
GSE15330_HSC_VS_MEGAKARYOCYTE_ERYTHROID_PROGENITOR_IKAROS_KO_UP	immunologic_out.txt	1
GSE15330_LYMPHOID_MULTIPOTENT_VS_MEGAKARYOCYTE_ERYTHROID_PROGENITOR_UP	immunologic_out.txt	1
GSE15330_LYMPHOID_MULTIPOTENT_VS_PRO_BCELL_UP	immunologic_out.txt	1
GSE15330_MEGAKARYOCYTE_ERYTHROID_VS_GRANULOCYTE_MONOCYTE_PROGENITOR_IKAROS_KO_DN	immunologic_out.txt	1
GSE15750_WT_VS_TRAF6KO_DAY10_EFF_CD8_TCELL_UP	immunologic_out.txt	1
GSE16450_CTRL_VS_IFNA_12H_STIM_IMMATURE_NEURON_CELL_LINE_UP	immunologic_out.txt	1
GSE17186_MEMORY_VS_NAIVE_BCELL_UP	immunologic_out.txt	1
GSE17580_TREG_VS_TEFF_S_MANSONI_INF_DN	immunologic_out.txt	1
GSE17721_0.5H_VS_12H_CPG_BMDC_UP	immunologic_out.txt	1
GSE17721_0.5H_VS_4H_CPG_BMDC_UP	immunologic_out.txt	1
GSE17721_0.5H_VS_4H_PAM3CSK4_BMDC_UP	immunologic_out.txt	1
GSE17721_0.5H_VS_4H_POLYIC_BMDC_DN	immunologic_out.txt	1
GSE17721_12H_VS_24H_LPS_BMDC_DN	immunologic_out.txt	1
GSE17721_CPG_VS_GARDIQUIMOD_0.5H_BMDC_DN	immunologic_out.txt	1
GSE17721_CPG_VS_GARDIQUIMOD_8H_BMDC_DN	immunologic_out.txt	1
GSE17721_CTRL_VS_CPG_1H_BMDC_DN	immunologic_out.txt	1
GSE17721_CTRL_VS_PAM3CSK4_0.5H_BMDC_DN	immunologic_out.txt	1
GSE17721_LPS_VS_PAM3CSK4_4H_BMDC_DN	immunologic_out.txt	1
GSE17721_LPS_VS_POLYIC_6H_BMDC_DN	immunologic_out.txt	1
GSE17721_PAM3CSK4_VS_CPG_0.5H_BMDC_UP	immunologic_out.txt	1
GSE17721_PAM3CSK4_VS_CPG_4H_BMDC_UP	immunologic_out.txt	1
GSE17721_PAM3CSK4_VS_GADIQUIMOD_6H_BMDC_UP	immunologic_out.txt	1
GSE17721_POLYIC_VS_CPG_0.5H_BMDC_UP	immunologic_out.txt	1
GSE17721_POLYIC_VS_PAM3CSK4_0.5H_BMDC_DN	immunologic_out.txt	1
GSE17721_POLYIC_VS_PAM3CSK4_8H_BMDC_UP	immunologic_out.txt	1
GSE17974_0H_VS_4H_IN_VITRO_ACT_CD4_TCELL_DN	immunologic_out.txt	1
GSE17974_1.5H_VS_72H_IL4_AND_ANTI_IL12_ACT_CD4_TCELL_DN	immunologic_out.txt	1
GSE17974_CTRL_VS_ACT_IL4_AND_ANTI_IL12_4H_CD4_TCELL_DN	immunologic_out.txt	1
GSE17974_IL4_AND_ANTI_IL12_VS_UNTREATED_0.5H_ACT_CD4_TCELL_DN	immunologic_out.txt	1
GSE18791_CTRL_VS_NEWCASTLE_VIRUS_DC_12H_UP	immunologic_out.txt	1
GSE18791_CTRL_VS_NEWCASTLE_VIRUS_DC_16H_UP	immunologic_out.txt	1
GSE18791_UNSTIM_VS_NEWCATSLE_VIRUS_DC_18H_UP	immunologic_out.txt	1
GSE19198_6H_VS_24H_IL21_TREATED_TCELL_DN	immunologic_out.txt	1
GSE19198_CTRL_VS_IL21_TREATED_TCELL_6H_DN	immunologic_out.txt	1
GSE19198_CTRL_VS_IL21_TREATED_TCELL_6H_UP	immunologic_out.txt	1
GSE1925_CTRL_VS_IFNG_PRIMED_MACROPHAGE_24H_IFNG_STIM_DN	immunologic_out.txt	1
GSE1925_CTRL_VS_IFNG_PRIMED_MACROPHAGE_24H_IFNG_STIM_UP	immunologic_out.txt	1
GSE19401_PLN_VS_PEYERS_PATCH_FOLLICULAR_DC_DN	immunologic_out.txt	1
GSE19401_UNSTIM_VS_PAM2CSK4_STIM_FOLLICULAR_DC_UP	immunologic_out.txt	1
GSE20366_CD103_POS_VS_NEG_TREG_KLRG1NEG_UP	immunologic_out.txt	1
GSE20715_0H_VS_48H_OZONE_TLR4_KO_LUNG_DN	immunologic_out.txt	1
GSE20754_WT_VS_TCF1_KO_MEMORY_CD8_TCELL_DN	immunologic_out.txt	1
GSE21033_3H_VS_24H_POLYIC_STIM_DC_DN	immunologic_out.txt	1
GSE21033_3H_VS_24H_POLYIC_STIM_DC_UP	immunologic_out.txt	1
GSE21033_CTRL_VS_POLYIC_STIM_DC_3H_DN	immunologic_out.txt	1
GSE2128_C57BL6_VS_NOD_CD4CD8_DP_THYMOCYTE_UP	immunologic_out.txt	1
GSE21360_NAIVE_VS_QUATERNARY_MEMORY_CD8_TCELL_DN	immunologic_out.txt	1
GSE21380_TFH_VS_GERMINAL_CENTER_TFH_CD4_TCELL_DN	immunologic_out.txt	1
GSE21546_ELK1_KO_VS_SAP1A_KO_AND_ELK1_KO_ANTI_CD3_STIM_DP_THYMOCYTES_UP	immunologic_out.txt	1
GSE21678_WT_VS_FOXO1_FOXO3_KO_TREG_DN	immunologic_out.txt	1
GSE21927_SPLEEN_VS_BONE_MARROW_MONOCYTE_BALBC_DN	immunologic_out.txt	1
GSE21927_SPLENIC_C26GM_TUMOROUS_VS_4T1_TUMOR_MONOCYTES_UP	immunologic_out.txt	1
GSE21927_UNTREATED_VS_GMCSF_GCSF_TREATED_BONE_MARROW_DN	immunologic_out.txt	1
GSE22103_UNSTIM_VS_GMCSF_AND_IFNG_STIM_NEUTROPHIL_UP	immunologic_out.txt	1
GSE22229_UNTREATED_VS_IMMUNOSUPP_THERAPY_RENAL_TRANSPLANT_PATIENT_PBMC_UP	immunologic_out.txt	1
GSE22432_MULTIPOTENT_VS_COMMON_DC_PROGENITOR_UNTREATED_DN	immunologic_out.txt	1
GSE22432_PDC_VS_TGFB1_TREATEDCOMMON_DC_PROGENITOR_DN	immunologic_out.txt	1
GSE22589_HEALTHY_VS_HIV_INFECTED_DC_DN	immunologic_out.txt	1
GSE22589_HIV_VS_HIV_AND_SIV_INFECTED_DC_DN	immunologic_out.txt	1
GSE22886_IGG_IGA_MEMORY_BCELL_VS_BM_PLASMA_CELL_DN	immunologic_out.txt	1
GSE22886_IL2_VS_IL15_STIM_NKCELL_DN	immunologic_out.txt	1
GSE22886_NAIVE_BCELL_VS_BM_PLASMA_CELL_UP	immunologic_out.txt	1
GSE22886_NAIVE_VS_IGM_MEMORY_BCELL_DN	immunologic_out.txt	1
GSE22886_TH1_VS_TH2_12H_ACT_UP	immunologic_out.txt	1
GSE22919_RESTING_VS_IL2_IL12_IL15_STIM_NK_CELL_UP	immunologic_out.txt	1
GSE2405_0H_VS_1.5H_A_PHAGOCYTOPHILUM_STIM_NEUTROPHIL_DN	immunologic_out.txt	1
GSE2405_HEAT_KILLED_VS_LIVE_A_PHAGOCYTOPHILUM_STIM_NEUTROPHIL_24H_DN	immunologic_out.txt	1
GSE2405_S_AUREUS_VS_A_PHAGOCYTOPHILUM_NEUTROPHIL_UP	immunologic_out.txt	1
GSE24210_CTRL_VS_IL35_TREATED_TCONV_CD4_TCELL_UP	immunologic_out.txt	1
GSE24210_TCONV_VS_TREG_UP	immunologic_out.txt	1
GSE25085_FETAL_LIVER_VS_ADULT_BM_SP4_THYMIC_IMPLANT_DN	immunologic_out.txt	1
GSE25085_FETAL_LIVER_VS_ADULT_BM_SP4_THYMIC_IMPLANT_UP	immunologic_out.txt	1
GSE25088_IL4_VS_IL4_AND_ROSIGLITAZONE_STIM_STAT6_KO_MACROPHAGE_DAY10_DN	immunologic_out.txt	1
GSE25088_ROSIGLITAZONE_VS_IL4_AND_ROSIGLITAZONE_STIM_MACROPHAGE_DAY10_DN	immunologic_out.txt	1
GSE25088_WT_VS_STAT6_KO_MACROPHAGE_ROSIGLITAZONE_STIM_UP	immunologic_out.txt	1
GSE26343_UNSTIM_VS_LPS_STIM_NFAT5_KO_MACROPHAGE_DN	immunologic_out.txt	1
GSE26343_WT_VS_NFAT5_KO_MACROPHAGE_DN	immunologic_out.txt	1
GSE26890_CXCR1_NEG_VS_POS_EFFECTOR_CD8_TCELL_DN	immunologic_out.txt	1
GSE26928_EFF_MEMORY_VS_CXCR5_POS_CD4_TCELL_UP	immunologic_out.txt	1
GSE26928_NAIVE_VS_EFF_MEMORY_CD4_TCELL_DN	immunologic_out.txt	1
GSE2706_R848_VS_LPS_8H_STIM_DC_UP	immunologic_out.txt	1
GSE27241_WT_VS_RORGT_KO_TH17_POLARIZED_CD4_TCELL_TREATED_WITH_DIGOXIN_UP	immunologic_out.txt	1
GSE27434_WT_VS_DNMT1_KO_TREG_DN	immunologic_out.txt	1
GSE2770_IL12_VS_IL4_TREATED_ACT_CD4_TCELL_48H_DN	immunologic_out.txt	1
GSE2770_TGFB_AND_IL4_VS_IL4_TREATED_ACT_CD4_TCELL_6H_DN	immunologic_out.txt	1
GSE2770_UNTREATED_VS_IL4_TREATED_ACT_CD4_TCELL_6H_DN	immunologic_out.txt	1
GSE27786_BCELL_VS_MONO_MAC_UP	immunologic_out.txt	1
GSE27786_BCELL_VS_NEUTROPHIL_UP	immunologic_out.txt	1
GSE27786_BCELL_VS_NKCELL_UP	immunologic_out.txt	1
GSE27786_CD8_TCELL_VS_ERYTHROBLAST_UP	immunologic_out.txt	1
GSE27786_CD8_TCELL_VS_MONO_MAC_UP	immunologic_out.txt	1
GSE27786_CD8_TCELL_VS_NEUTROPHIL_UP	immunologic_out.txt	1
GSE27786_CD8_TCELL_VS_NKCELL_UP	immunologic_out.txt	1
GSE27786_CD8_TCELL_VS_NKTCELL_UP	immunologic_out.txt	1
GSE27786_LIN_NEG_VS_BCELL_DN	immunologic_out.txt	1
GSE27786_LIN_NEG_VS_NEUTROPHIL_UP	immunologic_out.txt	1
GSE28237_FOLLICULAR_VS_LATE_GC_BCELL_DN	immunologic_out.txt	1
GSE29164_UNTREATED_VS_CD8_TCELL_TREATED_MELANOMA_DAY3_DN	immunologic_out.txt	1
GSE29618_BCELL_VS_MDC_UP	immunologic_out.txt	1
GSE29618_BCELL_VS_PDC_DAY7_FLU_VACCINE_UP	immunologic_out.txt	1
GSE29618_LAIV_VS_TIV_FLU_VACCINE_DAY7_MDC_DN	immunologic_out.txt	1
GSE29618_LAIV_VS_TIV_FLU_VACCINE_DAY7_PDC_UP	immunologic_out.txt	1
GSE29618_PRE_VS_DAY7_POST_LAIV_FLU_VACCINE_PDC_DN	immunologic_out.txt	1
GSE3039_ALPHABETA_CD8_TCELL_VS_B2_BCELL_UP	immunologic_out.txt	1
GSE3039_NKT_CELL_VS_B1_BCELL_DN	immunologic_out.txt	1
GSE31082_DN_VS_CD8_SP_THYMOCYTE_DN	immunologic_out.txt	1
GSE32423_MEMORY_VS_NAIVE_CD8_TCELL_IL7_UP	immunologic_out.txt	1
GSE32901_TH1_VS_TH17_NEG_CD4_TCELL_UP	immunologic_out.txt	1
GSE32986_CURDLAN_HIGHDOSE_VS_GMCSF_AND_CURDLAN_HIGHDOSE_STIM_DC_DN	immunologic_out.txt	1
GSE32986_CURDLAN_LOWDOSE_VS_CURDLAN_HIGHDOSE_STIM_DC_DN	immunologic_out.txt	1
GSE33162_UNTREATED_VS_4H_LPS_STIM_HDAC3_HET_MACROPHAGE_DN	immunologic_out.txt	1
GSE33162_UNTREATED_VS_4H_LPS_STIM_HDAC3_KO_MACROPHAGE_UP	immunologic_out.txt	1
GSE33292_DN3_THYMOCYTE_VS_TCELL_LYMPHOMA_FROM_TCF1_KO_UP	immunologic_out.txt	1
GSE34392_ST2_KO_VS_WT_DAY8_LCMV_EFFECTOR_CD8_TCELL_DN	immunologic_out.txt	1
GSE34515_CD16_POS_MONOCYTE_VS_DC_DN	immunologic_out.txt	1
GSE3565_CTRL_VS_LPS_INJECTED_DUSP1_KO_SPLENOCYTES_DN	immunologic_out.txt	1
GSE3565_CTRL_VS_LPS_INJECTED_SPLENOCYTES_DN	immunologic_out.txt	1
GSE3565_DUSP1_VS_WT_SPLENOCYTES_DN	immunologic_out.txt	1
GSE35825_UNTREATED_VS_IFNG_STIM_MACROPHAGE_DN	immunologic_out.txt	1
GSE360_HIGH_DOSE_B_MALAYI_VS_M_TUBERCULOSIS_MAC_UP	immunologic_out.txt	1
GSE360_L_DONOVANI_VS_B_MALAYI_LOW_DOSE_DC_UP	immunologic_out.txt	1
GSE360_L_MAJOR_VS_B_MALAYI_LOW_DOSE_DC_UP	immunologic_out.txt	1
GSE360_T_GONDII_VS_B_MALAYI_HIGH_DOSE_MAC_DN	immunologic_out.txt	1
GSE36476_CTRL_VS_TSST_ACT_16H_MEMORY_CD4_TCELL_OLD_UP	immunologic_out.txt	1
GSE36476_CTRL_VS_TSST_ACT_72H_MEMORY_CD4_TCELL_OLD_UP	immunologic_out.txt	1
GSE36826_NORMAL_VS_STAPH_AUREUS_INF_IL1R_KO_SKIN_DN	immunologic_out.txt	1
GSE36888_STAT5_AB_KNOCKIN_VS_WT_TCELL_IL2_TREATED_6H_UP	immunologic_out.txt	1
GSE3720_LPS_VS_PMA_STIM_VD1_GAMMADELTA_TCELL_DN	immunologic_out.txt	1
GSE37301_MULTIPOTENT_PROGENITOR_VS_COMMON_LYMPHOID_PROGENITOR_DN	immunologic_out.txt	1
GSE37416_0H_VS_12H_F_TULARENSIS_LVS_NEUTROPHIL_DN	immunologic_out.txt	1
GSE37416_0H_VS_24H_F_TULARENSIS_LVS_NEUTROPHIL_DN	immunologic_out.txt	1
GSE37416_CTRL_VS_24H_F_TULARENSIS_LVS_NEUTROPHIL_DN	immunologic_out.txt	1
GSE37532_VISCERAL_ADIPOSE_TISSUE_VS_LN_DERIVED_PPARG_KO_TCONV_CD4_TCELL_DN	immunologic_out.txt	1
GSE37605_C57BL6_VS_NOD_FOXP3_FUSION_GFP_TCONV_DN	immunologic_out.txt	1
GSE3920_IFNA_VS_IFNB_TREATED_ENDOTHELIAL_CELL_DN	immunologic_out.txt	1
GSE3920_UNTREATED_VS_IFNA_TREATED_FIBROBLAST_UP	immunologic_out.txt	1
GSE3982_BASOPHIL_VS_TH1_DN	immunologic_out.txt	1
GSE3982_BCELL_VS_NKCELL_UP	immunologic_out.txt	1
GSE3982_CTRL_VS_LPS_4H_MAC_UP	immunologic_out.txt	1
GSE3982_DC_VS_TH2_UP	immunologic_out.txt	1
GSE3982_EOSINOPHIL_VS_MAST_CELL_UP	immunologic_out.txt	1
GSE3982_EOSINOPHIL_VS_TH1_DN	immunologic_out.txt	1
GSE3982_MAC_VS_BASOPHIL_UP	immunologic_out.txt	1
GSE40274_FOXP3_VS_FOXP3_AND_IRF4_TRANSDUCED_ACTIVATED_CD4_TCELL_UP	immunologic_out.txt	1
GSE40685_NAIVE_CD4_TCELL_VS_TREG_UP	immunologic_out.txt	1
GSE41176_WT_VS_TAK1_KO_ANTI_IGM_STIM_BCELL_1H_UP	immunologic_out.txt	1
GSE411_UNSTIM_VS_100MIN_IL6_STIM_MACROPHAGE_DN	immunologic_out.txt	1
GSE41867_DAY6_VS_DAY8_LCMV_CLONE13_EFFECTOR_CD8_TCELL_DN	immunologic_out.txt	1
GSE41867_LCMV_ARMSTRONG_VS_CLONE13_DAY6_EFFECTOR_CD8_TCELL_DN	immunologic_out.txt	1
GSE41867_LCMV_ARMSTRONG_VS_CLONE13_DAY8_EFFECTOR_CD8_TCELL_DN	immunologic_out.txt	1
GSE41867_LCMV_ARMSTRONG_VS_CLONE13_DAY8_EFFECTOR_CD8_TCELL_UP	immunologic_out.txt	1
GSE42021_TCONV_PLN_VS_TREG_PRECURSORS_THYMUS_UP	immunologic_out.txt	1
GSE43863_TH1_VS_TFH_EFFECTOR_CD4_TCELL_DN	immunologic_out.txt	1
GSE43955_10H_VS_60H_ACT_CD4_TCELL_DN	immunologic_out.txt	1
GSE44649_NAIVE_VS_ACTIVATED_CD8_TCELL_DN	immunologic_out.txt	1
GSE45365_CD8A_DC_VS_CD11B_DC_IFNAR_KO_DN	immunologic_out.txt	1
GSE45365_HEALTHY_VS_MCMV_INFECTION_CD8A_DC_IFNAR_KO_DN	immunologic_out.txt	1
GSE4748_LPS_VS_LPS_AND_CYANOBACTERIUM_LPSLIKE_STIM_DC_3H_UP	immunologic_out.txt	1
GSE6090_UNSTIM_VS_DC_SIGN_STIM_DC_UP	immunologic_out.txt	1
GSE6092_UNSTIM_VS_IFNG_STIM_ENDOTHELIAL_CELL_DN	immunologic_out.txt	1
GSE6259_DEC205_POS_DC_VS_CD4_TCELL_DN	immunologic_out.txt	1
GSE6674_ANTI_IGM_VS_CPG_STIM_BCELL_UP	immunologic_out.txt	1
GSE6674_CPG_VS_PL2_3_STIM_BCELL_DN	immunologic_out.txt	1
GSE7219_UNSTIM_VS_LPS_AND_ANTI_CD40_STIM_NIK_NFKB2_KO_DC_UP	immunologic_out.txt	1
GSE7348_UNSTIM_VS_LPS_STIM_MACROPHAGE_DN	immunologic_out.txt	1
GSE7568_CTRL_VS_3H_TGFB_TREATED_MACROPHAGES_WITH_IL4_AND_DEXAMETHASONE_DN	immunologic_out.txt	1
GSE7852_LN_VS_FAT_TCONV_UP	immunologic_out.txt	1
GSE8515_IL1_VS_IL6_4H_STIM_MAC_UP	immunologic_out.txt	1
GSE8621_UNSTIM_VS_LPS_PRIMED_UNSTIM_MACROPHAGE_DN	immunologic_out.txt	1
GSE9006_HEALTHY_VS_TYPE_1_DIABETES_PBMC_1MONTH_POST_DX_DN	immunologic_out.txt	1
GSE9006_HEALTHY_VS_TYPE_1_DIABETES_PBMC_AT_DX_DN	immunologic_out.txt	1
GSE9037_CTRL_VS_LPS_1H_STIM_BMDM_DN	immunologic_out.txt	1
GSE9037_CTRL_VS_LPS_4H_STIM_IRAK4_KO_BMDM_DN	immunologic_out.txt	1
GSE9650_GP33_VS_GP276_LCMV_SPECIFIC_EXHAUSTED_CD8_TCELL_DN	immunologic_out.txt	1
GSE9988_ANTI_TREM1_AND_LPS_VS_CTRL_TREATED_MONOCYTES_DN	immunologic_out.txt	1
GSE9988_ANTI_TREM1_AND_LPS_VS_VEHICLE_TREATED_MONOCYTES_DN	immunologic_out.txt	1
GSE9988_ANTI_TREM1_VS_VEHICLE_TREATED_MONOCYTES_DN	immunologic_out.txt	1
GSTP1	computational_out.txt	1
HABP4	computational_out.txt	1
HALLMARK_COMPLEMENT	hallmark_out.txt	1
HALLMARK_MYC_TARGETS_V2	hallmark_out.txt	1
HCAR3	computational_out.txt	1
HCFC2	immunologic_out.txt	1
HNF1A	computational_out.txt	1
IGFBP7	computational_out.txt	1
ITGB3BP	computational_out.txt	1
ITK	computational_out.txt	1
JAK3	computational_out.txt	1
JRK	computational_out.txt	1
JUN	computational_out.txt	1
KIFC1	computational_out.txt	1
KMT2D	computational_out.txt	1
KRT18	computational_out.txt	1
KRT86	computational_out.txt	1
KRTAP5-9	computational_out.txt	1
LINC00987	immunologic_out.txt	1
LMNB2	computational_out.txt	1
LPAR2	computational_out.txt	1
LRP1	computational_out.txt	1
LRP8	computational_out.txt	1
LYN	computational_out.txt	1
MARCKS	computational_out.txt	1
MARF1	computational_out.txt	1
MAT1A	computational_out.txt	1
MB	computational_out.txt	1
ME1	computational_out.txt	1
MED6	immunologic_out.txt	1
MEF2C	computational_out.txt	1
MEK_UP.V1_DN	oncogenic_out.txt	1
MODULE_127	computational_out.txt	1
MODULE_191	computational_out.txt	1
MODULE_200	computational_out.txt	1
MODULE_259	computational_out.txt	1
MODULE_262	computational_out.txt	1
MODULE_303	computational_out.txt	1
MODULE_332	computational_out.txt	1
MODULE_51	computational_out.txt	1
MODULE_540	computational_out.txt	1
MODULE_61	computational_out.txt	1
MODULE_80	computational_out.txt	1
MORF_CCNI	computational_out.txt	1
MORF_CDC10	computational_out.txt	1
MORF_CUL1	computational_out.txt	1
MORF_ESPL1	computational_out.txt	1
MORF_MAP2K2	computational_out.txt	1
MORF_MYC	computational_out.txt	1
MORF_PAPSS1	computational_out.txt	1
MORF_RFC5	computational_out.txt	1
MTA1	computational_out.txt	1
MXD4	computational_out.txt	1
MYC	computational_out.txt	1
MYO10	computational_out.txt	1
MYT1	computational_out.txt	1
NAAA	computational_out.txt	1
NAB2	computational_out.txt	1
NAKAYA_MYELOID_DENDRITIC_CELL_FLUMIST_AGE_18_50YO_7DY_DN	immunologic_out.txt	1
NAKAYA_PBMC_FLUARIX_FLUVIRIN_AGE_18_50YO_7DY_UP	immunologic_out.txt	1
NAPSA	computational_out.txt	1
NCALD	computational_out.txt	1
NCF4	computational_out.txt	1
NECAB3	computational_out.txt	1
NECTIN1	computational_out.txt	1
NEO1	computational_out.txt	1
NEURL1	computational_out.txt	1
NFKBIB	computational_out.txt	1
NMB	computational_out.txt	1
NPAS1	computational_out.txt	1
NPY2R	computational_out.txt	1
NQO1	computational_out.txt	1
NTSR2	computational_out.txt	1
P2RX5	computational_out.txt	1
P2RY14	computational_out.txt	1
PAX6	computational_out.txt	1
PCCA	computational_out.txt	1
PCK1	computational_out.txt	1
PCLAF	computational_out.txt	1
PRRX2	computational_out.txt	1
PSMD12	computational_out.txt	1
QIU_PBMC_HEPTATITIS_B_SURFACE_ANTIGEN_AGE_UNDER50_NON_RESPONDERS_VS_RESPONDERS_0DY_UP	immunologic_out.txt	1
QIU_PBMC_HEPTATITIS_B_SURFACE_ANTIGEN_AGE_UNDER50_NON_RESPONDERS_VS_RESPONDERS_3DY_UP	immunologic_out.txt	1
RFC3	computational_out.txt	1
RING1	immunologic_out.txt	1
RPSA	computational_out.txt	1
SBNO2	computational_out.txt	1
SULT4A1	computational_out.txt	1
TGFB1	computational_out.txt	1
