# Supplementary material for: The Genetic Landscape of Canine Tumors: Insights from the Canine Cancer Genome Atlas (CCGA)
Source: Research Square preprint supplement (doi:10.21203/rs.3.rs-5025541/v1), 2024-09-19
Supplement: Supplementary file 15 [file ca2052bc9eaf88f1e1c0d60b.xlsx]

## Sheet: Normals
Sample	Coverage	BioProject
SRR1724602	17.98	PRJNA268531
SRR1723324	11.62	PRJNA268531
SRR1740390	10.77	PRJNA268531
SRR1741948	12.58	PRJNA268531
SRR1740617	10.02	PRJNA268531
SRR4037993	14	PRJNA339175
SRR4037995	37.8	PRJNA339175
SRR4037997	32.94	PRJNA339175
SRR6277173	12.66	PRJNA417727
SRR6277173	12.66	PRJNA417727
SRR6277175	25.72	PRJNA417727
SRR6277177	20.08	PRJNA417727
SRR6277179	18.9	PRJNA417727
SRR6277181	21.8	PRJNA417727
SRR6277183	9.17	PRJNA417727
SRR6277185	14.92	PRJNA417727
SRR6277188	7.36	PRJNA417727
SRR6277191	12.31	PRJNA417727
SRR6277192	7.99	PRJNA417727
SRR6277193	11.85	PRJNA417727
SRR6277196	13.45	PRJNA417727
SRR6277199	24.48	PRJNA417727
SRR6277200	17.02	PRJNA417727
SRR6277202	22.34	PRJNA417727
SRR6277204	14.28	PRJNA417727
SRR6277206	16.32	PRJNA417727
SRR6277209	8.3	PRJNA417727
SRR6277209	8.3	PRJNA417727
SRR6277211	8.57	PRJNA417727
SRR6277214	12.01	PRJNA417727
SRR6277216	11.91	PRJNA417727
SRR8510333	45.88	PRJNA518003
SRR8510348	28.89	PRJNA518003
SRR8510384	43.42	PRJNA518003
SRR8510335	41.59	PRJNA518003
SRR8510337	36.81	PRJNA518003
SRR8510339	53.85	PRJNA518003
SRR8510341	35.5	PRJNA518003
SRR8510346	38.58	PRJNA518003
SRR8510344	31.99	PRJNA518003
SRR8510350	32.15	PRJNA518003
SRR8510352	40.17	PRJNA518003
SRR8510355	28.17	PRJNA518003
SRR8510357	38	PRJNA518003
SRR8510359	36.14	PRJNA518003
SRR8510361	37.02	PRJNA518003
SRR8510369	35.35	PRJNA518003
SRR8510347	29.44	PRJNA518003
SRR8510353	35.92	PRJNA518003
SRR8510364	62.98	PRJNA518003
SRR8510367	44.76	PRJNA518003
SRR8510370	31.61	PRJNA518003
SRR8510372	37.9	PRJNA518003
SRR8510374	43.86	PRJNA518003
SRR8510376	41.94	PRJNA518003
SRR8510379	33.54	PRJNA518003
SRR8510381	40.81	PRJNA518003
SRR8510378	47.92	PRJNA518003
SRR8510386	39.17	PRJNA518003
SRR8653863	104.27	PRJNA523624
SRR8653926	77.44	PRJNA523624
SRR8653934	118.66	PRJNA523624
SRR8653836	103.42	PRJNA523624
SRR8653975	79.85	PRJNA523624
SRR8691810	51.6	PRJNA525883
SRR8691815	58.61	PRJNA525883
SRR8691706	51.61	PRJNA525883
SRR8691805	54.76	PRJNA525883
SRR8691707	50.33	PRJNA525883
SRR8691816	64.78	PRJNA525883
SRR8691818	58.22	PRJNA525883
SRR8691821	51.94	PRJNA525883
SRR8691750	45.76	PRJNA525883
SRR8691826	60.8	PRJNA525883
SRR8691830	59.49	PRJNA525883
SRR8691825	58.39	PRJNA525883
SRR8691828	61.34	PRJNA525883
SRR10260852	29.81	PRJNA552034
SRR10260854	17.06	PRJNA552034
SRR10260866	26.62	PRJNA552034
SRR10260857	46.86	PRJNA552034
SRR10260859	30.82	PRJNA552034
SRR10260861	25.76	PRJNA552034
SRR10260863	53.06	PRJNA552034
SRR10260865	30.63	PRJNA552034
SRR10260868	27.49	PRJNA552034
SRR10260870	48.98	PRJNA552034
SRR10260872	34.83	PRJNA552034
SRR10260874	27.78	PRJNA552034
SRR10260876	13.98	PRJNA552034
SRR10260888	31.99	PRJNA552034
SRR10260879	26.29	PRJNA552034
SRR10260881	31.76	PRJNA552034
SRR10260883	38.86	PRJNA552034
SRR10260885	34.47	PRJNA552034
SRR10260887	27.63	PRJNA552034
SRR10260890	30.52	PRJNA552034
SRR10260892	26.45	PRJNA552034
SRR10260894	47.09	PRJNA552034
SRR10260896	38.82	PRJNA552034
SRR10260898	38.99	PRJNA552034
SRR10260910	38.51	PRJNA552034
SRR10260901	32.01	PRJNA552034
SRR10260903	26.51	PRJNA552034
SRR10260905	27.8	PRJNA552034
SRR10260907	32.44	PRJNA552034
SRR10260909	33.55	PRJNA552034
SRR10260912	34.92	PRJNA552034
SRR10260914	36.36	PRJNA552034
SRR10260916	27.83	PRJNA552034
SRR10260918	32.52	PRJNA552034
SRR10260920	38.55	PRJNA552034
SRR10260932	37.95	PRJNA552034
SRR10260923	39.37	PRJNA552034
SRR10260925	30.54	PRJNA552034
SRR10260927	21.46	PRJNA552034
SRR10260929	31.27	PRJNA552034
SRR10260931	36.76	PRJNA552034
SRR10260934	43.84	PRJNA552034
SRR10260936	32.62	PRJNA552034
SRR10260938	43.16	PRJNA552034
SRR10260940	27.03	PRJNA552034
SRR10260942	32.73	PRJNA552034
SRR10260944	25.47	PRJNA552034
SRR9911342	38.28	PRJNA552905
SRR9911344	43.96	PRJNA552905
SRR9911346	37.58	PRJNA552905
SRR9911348	37.9	PRJNA552905
SRR9911350	40.07	PRJNA552905
SRR9911352	37.75	PRJNA552905
SRR9911354	41.7	PRJNA552905
SRR9911357	38.53	PRJNA552905
SRR9911356	38.68	PRJNA552905
SRR9911361	41.88	PRJNA552905
SRR9911363	39.15	PRJNA552905
SRR9911365	40.22	PRJNA552905
SRR9911380	38.49	PRJNA552905
SRR9911381	41.68	PRJNA552905
SRR9911370	39.23	PRJNA552905
SRR9911360	38.38	PRJNA552905
SRR9911373	38.23	PRJNA552905
SRR9911375	42.45	PRJNA552905
SRR9911377	41.37	PRJNA552905
SRR9911379	38.54	PRJNA552905
SRR13050739	77.61	PRJNA677995
SRR13050739	77.61	PRJNA677995
SRR13050739	77.61	PRJNA677995
SRR13050743	40.76	PRJNA677995
SRR13050743	40.76	PRJNA677995
SRR13050743	40.76	PRJNA677995
SRR13050747	87.19	PRJNA677995
SRR13050747	87.19	PRJNA677995
SRR13050747	87.19	PRJNA677995
SRR13050752	77.91	PRJNA677995
SRR13050752	77.91	PRJNA677995
SRR13050752	77.91	PRJNA677995
SRR7459230	61.44	SRP151732
SRR7459231	62.34	SRP151732
SRR7459232	72.56	SRP151732
SRR7459233	65.49	SRP151732
ERR1672129	16.38	ERP013521
ERR1672131	20.25	ERP013521
ERR1672133	19.54	ERP013521
ERR1672135	17.51	ERP013521
ERR1672137	15.92	ERP013521
ERR1672139	14.37	ERP013521
ERR1672141	17.39	ERP013521
ERR1672143	15.65	ERP013521
ERR1672145	13.29	ERP013521
ERR1672147	15.22	ERP013521
ERR1672149	15.46	ERP013521
ERR1672151	14.59	ERP013521
ERR1672153	16.67	ERP013521
ERR1672155	15.64	ERP013521
ERR1672157	14.52	ERP013521
ERR1672159	16.23	ERP013521
ERR1672161	17.91	ERP013521
ERR1672163	18.04	ERP013521
ERR1672165	17.52	ERP013521
ERR1672167	17.45	ERP013521
ERR1672169	21.6	ERP013521
ERR1672171	17.23	ERP013521
ERR1672173	15.23	ERP013521
ERR1672175	15.73	ERP013521
ERR1672177	13.45	ERP013521
ERR1672179	18.39	ERP013521
ERR1672181	18.59	ERP013521
ERR1672183	22.84	ERP013521
ERR1672186	16.09	ERP013521
ERR1672188	15.97	ERP013521
ERR1672190	20.25	ERP013521
ERR1672193	18.92	ERP013521
ERR1672195	18.2	ERP013521
ERR1672197	17.43	ERP013521
ERR1672201	18.02	ERP013521
ERR1672204	18.12	ERP013521
ERR1672206	16.61	ERP013521
ERR1672208	14.26	ERP013521
ERR1672210	14.56	ERP013521
ERR1672212	16.04	ERP013521
ERR1672214	18.55	ERP013521
ERR1672216	16.81	ERP013521
ERR1672218	21.1	ERP013521
ERR1672220	19.92	ERP013521
ERR1672222	18.11	ERP013521
ERR1672224	16.34	ERP013521
ERR1672226	15.21	ERP013521
ERR1672228	18.25	ERP013521
ERR1672232	14.04	ERP013521
ERR1672234	16.08	ERP013521
ERR1672236	16.77	ERP013521
ERR1672238	15.87	ERP013521
ERR1672240	18.11	ERP013521
ERR1672242	16.98	ERP013521
ERR1672244	15.81	ERP013521
ERR1672246	16.95	ERP013521
ERR1672248	18.68	ERP013521
ERR1672250	18.79	ERP013521
ERR1672252	18.36	ERP013521
ERR1672254	18.26	ERP013521
ERR1672256	23.36	ERP013521
ERR1672258	18.79	ERP013521
ERR1672260	16.61	ERP013521
ERR1672262	17.14	ERP013521
ERR1672264	14.65	ERP013521
ERR1672266	18.89	ERP013521
ERR1672268	19.09	ERP013521
ERR1672270	23.38	ERP013521
ERR1672273	16.54	ERP013521
ERR1672275	17.75	ERP013521
ERR1672277	22.49	ERP013521
ERR1672280	21.04	ERP013521
ERR1672282	20.3	ERP013521
ERR1672284	18.84	ERP013521
ERR1672288	19.47	ERP013521
ERR1672291	19.43	ERP013521
ERR2396464	23.98	ERP013521
ERR2396466	24.45	ERP013521
ERR2396468	21.46	ERP013521
ERR1681423	17.77	ERP013521
ERR1681425	15.23	ERP013521
ERR1681427	15.58	ERP013521
ERR1681429	17.17	ERP013521
ERR1681431	19.89	ERP013521
ERR1681433	18.1	ERP013521
ERR1681435	22.22	ERP013521
ERR1681437	19.35	ERP013521
ERR1681439	16.97	ERP013521
ERR1681442	16.63	ERP013521
ERR1681444	14.97	ERP013521
ERR1681446	14.35	ERP013521
ERR1681448	14.35	ERP013521
ERR1681450	24.3	ERP013521
ERR1681452	22.32	ERP013521
ERR1681454	22.55	ERP013521
ERR1681456	24.04	ERP013521
ERR1681458	19.42	ERP013521
ERR1681463	17.21	ERP013521
ERR1681465	20.07	ERP013521
ERR1681467	17.55	ERP013521
ERR1681472	22.53	ERP013521
ERR1681474	15.69	ERP013521
ERR1681476	13.67	ERP013521
ERR1681478	19.43	ERP013521
ERR1681480	24.21	ERP013521
ERR1681482	20.75	ERP013521
ERR1681484	18.33	ERP013521
ERR1681487	17.83	ERP013521
ERR1681489	15.95	ERP013521
ERR1681491	15.24	ERP013521
ERR1681493	15.26	ERP013521
ERR1681495	23.37	ERP013521
ERR1681497	21.43	ERP013521
ERR1681499	21.71	ERP013521
ERR1681501	23.13	ERP013521
ERR1681503	19.68	ERP013521
ERR1681508	17.4	ERP013521
ERR1681510	20.26	ERP013521
ERR1681512	17.79	ERP013521
ERR1681517	24.19	ERP013521
ERR1681519	16.94	ERP013521
ERR1681521	14.69	ERP013521
ERR2496950	22.65	ERP013521
ERR2496952	23.2	ERP013521
ERR2496954	20.15	ERP013521
ERR2496958	12.19	ERP013521
ERR2496960	11.14	ERP013521
ERR2496962	10.38	ERP013521
ERR2496964	11.04	ERP013521
ERR2496966	11.14	ERP013521
ERR2436311	13	ERP013521
ERR2436313	11.86	ERP013521
ERR2436315	11.12	ERP013521
ERR2436317	11.75	ERP013521
ERR2436319	11.9	ERP013521
SRR5836924	44.68	PRJNA391455
SRR5836926	54.75	PRJNA391455
SRR5836928	53.53	PRJNA391455
SRR5836930	39.98	PRJNA391455
SRR5836932	53.13	PRJNA391455
SRR5836934	72.65	PRJNA391455
SRR5836936	39.87	PRJNA391455
SRR5836938	47.81	PRJNA391455
SRR5836940	46.71	PRJNA391455
SRR5836942	51.17	PRJNA391455
SRR5836943	39.71	PRJNA391455
SRR5836945	22.72	PRJNA391455
SRR5836947	48.83	PRJNA391455
SRR5836949	57.32	PRJNA391455
SRR5836951	55.58	PRJNA391455
SRR5836953	37.56	PRJNA391455
SRR5836956	56.16	PRJNA391455
SRR5836958	57.57	PRJNA391455
SRR5836960	48.36	PRJNA391455
SRR5836962	46.71	PRJNA391455
SRR5836963	23.61	PRJNA391455
SRR5836965	25.08	PRJNA391455
SRR5836967	24.18	PRJNA391455
SRR5836969	37.71	PRJNA391455
SRR5836972	57.92	PRJNA391455
SRR5836974	67.02	PRJNA391455
SRR5836976	42.89	PRJNA391455
SRR5836978	45.69	PRJNA391455
SRR5836980	61.15	PRJNA391455
SRR5836981	50.42	PRJNA391455
SRR5836983	50.63	PRJNA391455
SRR5836985	54.03	PRJNA391455
SRR5836987	39.91	PRJNA391455
SRR5836989	44.69	PRJNA391455
SRR5836991	83.42	PRJNA391455
SRR5836993	47.25	PRJNA391455
SRR5836995	56.59	PRJNA391455
SRR5836997	62.49	PRJNA391455
SRR5836999	51	PRJNA391455
SRR5837001	47.1	PRJNA391455
SRR5837003	35.99	PRJNA391455
SRR5837005	22.31	PRJNA391455
SRR5837007	54.61	PRJNA391455
SRR5837009	49	PRJNA391455
SRR5837011	46.34	PRJNA391455
SRR5837014	41.24	PRJNA391455
SRR5837016	45.05	PRJNA391455
SRR5837018	56.74	PRJNA391455
SRR5837020	47.14	PRJNA391455
SRR5837022	55.67	PRJNA391455
SRR5837024	59.17	PRJNA391455
SRR5837025	38.81	PRJNA391455
SRR5837027	43.19	PRJNA391455
SRR5837029	14.62	PRJNA391455
SRR5837031	52.61	PRJNA391455
SRR5837033	50.37	PRJNA391455
SRR5837036	16.77	PRJNA391455
SRR5837038	34.57	PRJNA391455
SRR5837040	50.31	PRJNA391455
SRR5837042	56.13	PRJNA391455
SRR5837044	56.39	PRJNA391455
SRR5837045	51.63	PRJNA391455
SRR5837047	22.75	PRJNA391455
SRR10351558	74.81	PRJNA579792
SRR10351560	67.71	PRJNA579792
SRR10351562	64.25	PRJNA579792
SRR10351564	68.33	PRJNA579792
SRR10351568	73.3	PRJNA579792
SRR10351571	69.54	PRJNA579792
SRR10351573	70.74	PRJNA579792
SRR10351577	45.15	PRJNA579792
SRR10351580	60.22	PRJNA579792
SRR10351583	36.61	PRJNA579792
SRR10351691	44.55	PRJNA579792
SRR10351693	63.24	PRJNA579792
SRR10351695	65.37	PRJNA579792
SRR10351699	75.71	PRJNA579792
SRR10351701	59.15	PRJNA579792
SRR10351703	48.79	PRJNA579792
SRR10351705	178.42	PRJNA579792
SRR10351707	86.83	PRJNA579792
SRR10351710	22.83	PRJNA579792
SRR10351712	40.2	PRJNA579792
SRR10351714	63.22	PRJNA579792
SRR10351718	55.26	PRJNA579792
SRR10351722	69.34	PRJNA579792
SRR10351724	62.1	PRJNA579792
SRR10351726	58.16	PRJNA579792
SRR10351729	48.04	PRJNA579792
SRR10351732	65.36	PRJNA579792
SRR10351735	61.64	PRJNA579792
SRR10351737	48.83	PRJNA579792
SRR10351742	102.11	PRJNA579792
SRR10351744	66.21	PRJNA579792
SRR10351746	55.47	PRJNA579792
SRR10351748	66.04	PRJNA579792
SRR10351750	26	PRJNA579792
SRR10351755	71.92	PRJNA579792
SRR10351758	84.31	PRJNA579792
SRR10351761	50.15	PRJNA579792
SRR10351763	48.79	PRJNA579792
SRR10351766	60.06	PRJNA579792
SRR10351768	67.14	PRJNA579792
SRR10351770	45.14	PRJNA579792
SRR10351774	51.1	PRJNA579792
SRR10351777	57.5	PRJNA579792
SRR10351779	65.73	PRJNA579792
SRR10351783	71.07	PRJNA579792
SRR10351785	32.96	PRJNA579792
SRR10351788	72.31	PRJNA579792
SRR10351791	71.49	PRJNA579792
SRR10351796	41.69	PRJNA579792
SRR10351800	22.06	PRJNA579792
SRR10351802	27.06	PRJNA579792
SRR10351804	63.23	PRJNA579792
SRR10351806	57.11	PRJNA579792
SRR10351810	56.65	PRJNA579792
SRR11392158	103.89	PRJNA613479-PRJNA503860
SRR11392158	103.89	PRJNA616374-PRJNA503860
SRR11392159	89.68	PRJNA613479-PRJNA503860
SRR11392159	89.68	PRJNA616374-PRJNA503860
SRR11392160	92.56	PRJNA613479-PRJNA503860
SRR11392160	92.56	PRJNA616374-PRJNA503860
SRR11392161	172.16	PRJNA613479-PRJNA503860
SRR11392161	172.16	PRJNA616374-PRJNA503860
SRR11392162	176.63	PRJNA613479-PRJNA503860
SRR11392162	176.63	PRJNA616374-PRJNA503860
SRR11392163	170.33	PRJNA613479-PRJNA503860
SRR11392163	170.33	PRJNA616374-PRJNA503860
SRR11392170	153.04	PRJNA613479-PRJNA503860
SRR11392170	153.04	PRJNA616374-PRJNA503860
SRR11392164	93.63	PRJNA613479-PRJNA503860
SRR11392164	93.63	PRJNA616374-PRJNA503860
SRR11392165	123.85	PRJNA613479-PRJNA503860
SRR11392165	123.85	PRJNA616374-PRJNA503860
SRR11392166	109.7	PRJNA613479-PRJNA503860
SRR11392166	109.7	PRJNA616374-PRJNA503860
SRR11392167	119.31	PRJNA613479-PRJNA503860
SRR11392167	119.31	PRJNA616374-PRJNA503860
SRR11392168	138.98	PRJNA613479-PRJNA503860
SRR11392168	138.98	PRJNA616374-PRJNA503860
SRR11392169	132.74	PRJNA613479-PRJNA503860
SRR11392169	132.74	PRJNA616374-PRJNA503860
SRR11392181	95.69	PRJNA613479-PRJNA503860
SRR11392181	95.69	PRJNA616374-PRJNA503860
SRR11392172	125.3	PRJNA613479-PRJNA503860
SRR11392172	125.3	PRJNA616374-PRJNA503860
SRR11392173	129.3	PRJNA613479-PRJNA503860
SRR11392173	129.3	PRJNA616374-PRJNA503860
SRR11392174	140.15	PRJNA613479-PRJNA503860
SRR11392174	140.15	PRJNA616374-PRJNA503860
SRR11392175	119.42	PRJNA613479-PRJNA503860
SRR11392175	119.42	PRJNA616374-PRJNA503860
SRR11392176	67.16	PRJNA613479-PRJNA503860
SRR11392176	67.16	PRJNA616374-PRJNA503860
SRR11392177	181.91	PRJNA613479-PRJNA503860
SRR11392177	181.91	PRJNA616374-PRJNA503860
SRR11392178	63.52	PRJNA613479-PRJNA503860
SRR11392178	63.52	PRJNA616374-PRJNA503860
SRR11392179	138.37	PRJNA613479-PRJNA503860
SRR11392179	138.37	PRJNA616374-PRJNA503860
SRR11392180	120.9	PRJNA613479-PRJNA503860
SRR11392180	120.9	PRJNA616374-PRJNA503860
SRR11392157	131.44	PRJNA613479-PRJNA503860
SRR11392157	131.44	PRJNA616374-PRJNA503860
SRR11392182	204.24	PRJNA613479-PRJNA503860
SRR11392182	204.24	PRJNA616374-PRJNA503860
SRR8158892	33.93	PRJNA613479-PRJNA503860
SRR8158892	33.93	PRJNA616374-PRJNA503860
SRR8158890	32.84	PRJNA613479-PRJNA503860
SRR8158890	32.84	PRJNA616374-PRJNA503860
SRR8158891	30.82	PRJNA613479-PRJNA503860
SRR8158891	30.82	PRJNA616374-PRJNA503860
SRR13123343	82.96	PRJNA680382
SRR13123343	82.96	PRJNA680382
SRR13123349	76.62	PRJNA680382
SRR13123349	76.62	PRJNA680382
SRR15461438	62.95	PRJNA752630
SRR15461431	57.03	PRJNA752630
SRR15461447	54.14	PRJNA752630
SRR15461432	67.91	PRJNA752630
SRR15508633	101.19	PRJNA752630
SRR15508632	86.54	PRJNA752630
SRR15508631	63.3	PRJNA752630
SRR15508630	82.84	PRJNA752630
SRR15508628	104.91	PRJNA752630
SRR15508627	74.71	PRJNA752630
SRR15508626	70.23	PRJNA752630
SRR15508625	84.8	PRJNA752630
SRR15508624	75.26	PRJNA752630
SRR15508623	76.29	PRJNA752630
SRR15461434	58.63	PRJNA752630
SRR15461446	66.55	PRJNA752630
SRR15461445	34.99	PRJNA752630
SRR15461444	60.92	PRJNA752630
SRR15461443	54.79	PRJNA752630
SRR15461442	65.66	PRJNA752630
SRR15461449	52.27	PRJNA752630
SRR15461448	57.1	PRJNA752630
SRR15508613	73.95	PRJNA752630
SRR15508612	73.72	PRJNA752630
SRR15508629	95.67	PRJNA752630
SRR15508618	121.94	PRJNA752630
SRR15508641	59.43	PRJNA752630
SRR15508640	136.41	PRJNA752630
SRR15461425	51.67	PRJNA752630
SRR15461424	66.33	PRJNA752630
SRR15461427	74.82	PRJNA752630
SRR15461426	67.49	PRJNA752630
SRR15461470	67.52	PRJNA752630
SRR15461433	53.72	PRJNA752630
SRR15461468	71.71	PRJNA752630
SRR15461469	60.02	PRJNA752630
SRR15461466	58.18	PRJNA752630
SRR15461467	66.29	PRJNA752630
SRR15461464	74.99	PRJNA752630
SRR15461465	61.39	PRJNA752630
SRR15461461	70.04	PRJNA752630
SRR15461462	58.26	PRJNA752630
SRR15461451	51	PRJNA752630
SRR15461440	51.95	PRJNA752630
SRR15461450	53.81	PRJNA752630
SRR15461457	50.38	PRJNA752630
SRR15508614	48.21	PRJNA752630
SRR15508615	61.71	PRJNA752630
SRR15508616	50.41	PRJNA752630
SRR15508617	59.51	PRJNA752630
SRR15508619	56.56	PRJNA752630
SRR15508620	71.53	PRJNA752630
SRR15508621	99.93	PRJNA752630
SRR15508622	97.63	PRJNA752630
SRR15461455	69.61	PRJNA752630
SRR15461439	48.87	PRJNA752630
SRR15461456	53.6	PRJNA752630
SRR15461459	65.19	PRJNA752630
SRR15461460	63.26	PRJNA752630
SRR15461428	51.65	PRJNA752630
SRR15461429	50.63	PRJNA752630
SRR15508634	87.17	PRJNA752630
SRR15508635	71.13	PRJNA752630
SRR15461453	44.28	PRJNA752630
SRR15461454	47.69	PRJNA752630
SRR15508638	79.3	PRJNA752630
SRR15508639	70.85	PRJNA752630
SRR15508636	81.34	PRJNA752630
SRR15508637	80.77	PRJNA752630
SRR15508610	73.57	PRJNA752630
SRR15508611	99.38	PRJNA752630
SRR15508608	91.15	PRJNA752630
SRR15508609	82.66	PRJNA752630
SRR15461435	51.48	PRJNA752630
SRR15461436	52.61	PRJNA752630
SRR15461458	59.55	PRJNA752630
SRR15461437	69.7	PRJNA752630
SRR17139341	61.57	PRJNA786469
SRR17139201	56.83	PRJNA786469
SRR17139203	34.11	PRJNA786469
SRR17139205	50.89	PRJNA786469
SRR17139207	38.59	PRJNA786469
SRR17139293	56.28	PRJNA786469
SRR17139295	73.49	PRJNA786469
SRR17139297	54.17	PRJNA786469
SRR17139300	52.75	PRJNA786469
SRR17139302	59.96	PRJNA786469
SRR17139304	50.25	PRJNA786469
SRR17139306	45.73	PRJNA786469
SRR17139308	41.68	PRJNA786469
SRR17139311	72.31	PRJNA786469
SRR17139313	37.98	PRJNA786469
SRR17139315	53.14	PRJNA786469
SRR17139317	52.32	PRJNA786469
SRR17139319	44.9	PRJNA786469
SRR17139322	58.04	PRJNA786469
SRR17139324	57.35	PRJNA786469
SRR17139326	53.21	PRJNA786469
SRR17139328	48.07	PRJNA786469
SRR17139330	57.98	PRJNA786469
SRR17139333	45.06	PRJNA786469
SRR17139335	47.53	PRJNA786469
SRR17139339	54.08	PRJNA786469
SRR1923129	17.46	TBCL
SRR1927940	21.37	TBCL
SRR1923220	22.52	TBCL
SRR1927953	13.99	TBCL
SRR1927954	17.05	TBCL
SRR1923251	19.39	TBCL
SRR1928060	20.89	TBCL
SRR1923253	15.19	TBCL
SRR1923979	20.48	TBCL
SRR1927983	31.93	TBCL
SRR1928066	24.42	TBCL
SRR1923476	27.36	TBCL
SRR1923436	24.22	TBCL
SRR1923209	31.48	TBCL
SRR1923112	24.75	TBCL
SRR1923657	26.22	TBCL
SRR1923647	18.92	TBCL
SRR1928127	19.46	TBCL
SRR1924066	6.95	TBCL
SRR1922994	15.51	TBCL
SRR1928075	19.11	TBCL
SRR1923138	18.39	TBCL
SRR1923246	19.55	TBCL
SRR1923274	17.1	TBCL
SRR1923067	18.21	TBCL
SRR1924058	20.45	TBCL
SRR1923394	22.22	TBCL
SRR1923365	31.58	TBCL
SRR1923686	37.46	TBCL
SRR1927948	30.64	TBCL
SRR1923303	20.19	TBCL
SRR1923688	21.47	TBCL
SRR1923262	18.84	TBCL
SRR1923977	19.79	TBCL
SRR1927971	29.18	TBCL
SRR1923497	17.79	TBCL
SRR1927935	20.25	TBCL
SRR1923750	16.74	TBCL
SRR1923473	19.04	TBCL
SRR1923108	25.75	TBCL
SRR1928044	22.03	TBCL
SRR1927968	21.52	TBCL
SRR1927939	24.34	TBCL
SRR1923628	22.35	TBCL
SRR1924047	13.96	TBCL
SRR1923340	20.68	TBCL
SRR1923714	21.12	TBCL
SRR1927989	13.86	TBCL
SRR1927942	22.1	TBCL
SRR1923248	20.79	TBCL
SRR1923734	27.62	TBCL
SRR1923247	22.74	TBCL
SRR1923458	18.77	TBCL
SRR1927982	22.49	TBCL
SRR1928068	23.3	TBCL
SRR1928058	25.14	TBCL
SRR1923558	25.23	TBCL
SRR1923486	26.21	TBCL
SRR1923408	12.3	TBCL
SRR1943100	28.41	TBCL
SRR1923720	28.33	TBCL
SRR2180279	11.71	TBCL
SRR2175575	16.79	TBCL
SRR2175629	27.26	TBCL
SRR2180322	29.05	TBCL
SRR2180321	18.25	TBCL
SRR2180282	18.88	TBCL
SRR2180277	26.06	TBCL
SRR2175586	11.96	TBCL
SRR2175614	18.8	TBCL
SRR2175655	12.09	TBCL
SRR2175596	23.09	TBCL
SRR2175617	20.85	TBCL
SRR2175623	19.49	TBCL
SRR2180275	26.66	TBCL
SRR2180319	19.09	TBCL
SRR2180289	20.55	TBCL
SRR1923428	18.9	TBCL
SRR1928083	21.04	TBCL
SRR1923279	18.29	TBCL
SRR1923335	24.21	TBCL
SRR1924087	14.76	TBCL
SRR1923454	17.08	TBCL
SRR1923776	23.27	TBCL
SRR1924068	23.04	TBCL
SRR1923743	31.59	TBCL
SRR1923239	20.64	TBCL
SRR1923735	14.01	TBCL
SRR1923466	13.34	TBCL
SRR1923357	15.77	TBCL
SRR1923764	19.59	TBCL
SRR1923746	19.22	TBCL
SRR1924032	30.17	TBCL
SRR1927962	16.67	TBCL
SRR1923557	16.07	TBCL
SRR1928042	19.66	TBCL
SRR1923387	20.64	TBCL
SRR1923266	18.38	TBCL
SRR1923562	17.94	TBCL
SRR1923300	14.07	TBCL
SRR7780731	29.24	SRP159481
SRR7780733	26.91	SRP159481
SRR7780735	30.84	SRP159481
SRR7780737	30.12	SRP159481
SRR7780740	35.78	SRP159481
SRR7780742	29.12	SRP159481
SRR7780744	33.37	SRP159481
SRR7780746	29.99	SRP159481
SRR7780747	32.22	SRP159481
SRR7780752	31.26	SRP159481
SRR7780753	33.93	SRP159481
SRR7780757	30.63	SRP159481
SRR7780767	29.53	SRP159481
SRR7780771	26.24	SRP159481
SRR7780773	32.77	SRP159481
SRR7780778	33.95	SRP159481
SRR7780782	27.51	SRP159481
SRR7780786	24.31	SRP159481
SRR7780788	29.87	SRP159481
SRR7780792	29.43	SRP159481
SRR7780794	31.02	SRP159481
SRR7780802	32.39	SRP159481
SRR7780807	26.69	SRP159481
SRR7780810	31.97	SRP159481
SRR7780812	26.55	SRP159481
SRR7780814	29.62	SRP159481
SRR7780828	38.96	SRP159481
SRR7780830	24.25	SRP159481
SRR7780834	29.7	SRP159481
SRR7780836	53.1	SRP159481
SRR7780843	40.02	SRP159481
SRR7780847	25.29	SRP159481
SRR7780849	32.51	SRP159481
SRR7780851	26.8	SRP159481
SRR7780853	31.59	SRP159481
SRR7780856	29.42	SRP159481
SRR7780859	31.42	SRP159481
SRR7780861	30.87	SRP159481
SRR7780865	28.25	SRP159481
SRR7780867	34.32	SRP159481
SRR7780869	30.81	SRP159481
SRR7780871	32.44	SRP159481
SRR7780876	22.65	SRP159481
SRR7780878	23.33	SRP159481
SRR7780883	30.2	SRP159481
SRR7780887	48.35	SRP159481
SRR7780889	27.84	SRP159481
SRR7780891	31.05	SRP159481
SRR7780900	32.9	SRP159481
SRR7780902	29.64	SRP159481
SRR7780909	30.74	SRP159481
SRR7780911	27.95	SRP159481
SRR7780913	29.28	SRP159481
SRR7780915	45.79	SRP159481
SRR7780917	26.52	SRP159481
SRR7780920	34.34	SRP159481
SRR7780924	27.37	SRP159481
SRR7780926	31.36	SRP159481
SRR7780931	28.02	SRP159481
SRR7780933	22.78	SRP159481
SRR7780939	32.5	SRP159481
SRR7780941	31.33	SRP159481
SRR7780943	30.57	SRP159481
SRR7780946	28.84	SRP159481
SRR7780952	25.48	SRP159481
SRR7780954	26.37	SRP159481
SRR7780958	30.23	SRP159481
SRR7780960	24.69	SRP159481
SRR7780965	36.36	SRP159481
SRR7780967	32.12	SRP159481
SRR7780969	28.13	SRP159481
SRR7780970	37.39	SRP159481
SRR7780972	52.91	SRP159481
SRR7780974	28.69	SRP159481
SRR7780983	26.71	SRP159481
SRR7780985	28.86	SRP159481
SRR7780989	33.46	SRP159481
SRR7780992	30.47	SRP159481
SRR7780994	31.2	SRP159481
SRR7780996	20.28	SRP159481
SRR7781000	30.88	SRP159481
SRR7781003	35.18	SRP159481
SRR7781009	29.79	SRP159481
SRR7781010	27.66	SRP159481
SRR7781012	31.24	SRP159481
SRR7781018	29.25	SRP159481
SRR7781020	27.12	SRP159481
SRR7781026	29.28	SRP159481
SRR7781030	20.8	SRP159481
SRR7781032	28.26	SRP159481
SRR7781034	27.19	SRP159481
SRR7781036	33.05	SRP159481
SRR7781042	52.73	SRP159481
SRR7781044	29.27	SRP159481
SRR7781046	27.2	SRP159481
SRR7781049	30.29	SRP159481
SRR7781053	28.98	SRP159481
SRR7781059	30.77	SRP159481
SRR7781065	35.03	SRP159481
SRR7781067	30.91	SRP159481
SRR7781068	31.7	SRP159481
SRR7781069	30.89	SRP159481
SRR7781074	28.18	SRP159481
SRR7781079	28.39	SRP159481
SRR7781081	25.51	SRP159481
SRR7781083	24.84	SRP159481
SRR7781085	32.67	SRP159481
SRR7781092	31.64	SRP159481
SRR7781094	29.59	SRP159481
SRR7781098	31.3	SRP159481
SRR7781100	28.5	SRP159481
SRR7781102	29.76	SRP159481
SRR7781104	34.77	SRP159481
SRR7781106	31.64	SRP159481
SRR7781108	30.84	SRP159481
SRR7781110	32.31	SRP159481

## Sheet: Tumors
Sample	Coverage	BioProject
SRR1708681	19.14	PRJNA268531
SRR1708445	10.86	PRJNA268531
SRR1709275	11.3	PRJNA268531
SRR1721667	11.32	PRJNA268531
SRR1721666	11.38	PRJNA268531
SRR4037992	14.12	PRJNA339175
SRR4037994	29.73	PRJNA339175
SRR4037996	36.76	PRJNA339175
SRR6277174	7.27	PRJNA417727
SRR6277210	21.87	PRJNA417727
SRR6277176	32.44	PRJNA417727
SRR6277178	36.43	PRJNA417727
SRR6277180	42.7	PRJNA417727
SRR6277182	40.6	PRJNA417727
SRR6277184	21.77	PRJNA417727
SRR6277186	24.49	PRJNA417727
SRR6277187	14.72	PRJNA417727
SRR6277189	25.93	PRJNA417727
SRR6277190	25.53	PRJNA417727
SRR6277194	18.23	PRJNA417727
SRR6277195	27.39	PRJNA417727
SRR6277197	40.39	PRJNA417727
SRR6277198	25.23	PRJNA417727
SRR6277201	55.53	PRJNA417727
SRR6277203	25.78	PRJNA417727
SRR6277205	38.98	PRJNA417727
SRR6277207	14.7	PRJNA417727
SRR6277208	4.53	PRJNA417727
SRR6277212	23.19	PRJNA417727
SRR6277213	20.37	PRJNA417727
SRR6277215	21.46	PRJNA417727
SRR8510331	47.59	PRJNA518003
SRR8510332	51.19	PRJNA518003
SRR8510334	53.7	PRJNA518003
SRR8510336	59.97	PRJNA518003
SRR8510338	40.56	PRJNA518003
SRR8510340	48.47	PRJNA518003
SRR8510342	45.06	PRJNA518003
SRR8510343	51.68	PRJNA518003
SRR8510345	48.56	PRJNA518003
SRR8510349	44.27	PRJNA518003
SRR8510351	61.7	PRJNA518003
SRR8510354	46.18	PRJNA518003
SRR8510356	40.92	PRJNA518003
SRR8510358	43.39	PRJNA518003
SRR8510360	53.5	PRJNA518003
SRR8510362	43.3	PRJNA518003
SRR8510363	48.97	PRJNA518003
SRR8510365	54.65	PRJNA518003
SRR8510366	75.14	PRJNA518003
SRR8510368	46.33	PRJNA518003
SRR8510371	49.98	PRJNA518003
SRR8510373	39.75	PRJNA518003
SRR8510375	48.97	PRJNA518003
SRR8510377	39.03	PRJNA518003
SRR8510380	50.47	PRJNA518003
SRR8510382	37.16	PRJNA518003
SRR8510383	109.53	PRJNA518003
SRR8510385	54.95	PRJNA518003
SRR8653849	108.88	PRJNA523624
SRR8653923	103.7	PRJNA523624
SRR8653933	117.91	PRJNA523624
SRR8653949	102.88	PRJNA523624
SRR8653974	117.06	PRJNA523624
SRR8691763	61.4	PRJNA525883
SRR8691802	48.17	PRJNA525883
SRR8691803	59.77	PRJNA525883
SRR8691808	70.89	PRJNA525883
SRR8691809	41.75	PRJNA525883
SRR8691817	57.56	PRJNA525883
SRR8691819	28.06	PRJNA525883
SRR8691820	41.95	PRJNA525883
SRR8691822	51.97	PRJNA525883
SRR8691827	60.41	PRJNA525883
SRR8691751	52.8	PRJNA525883
SRR8691824	58.59	PRJNA525883
SRR8691829	58.44	PRJNA525883
SRR10260851	10	PRJNA552034
SRR10260853	25.53	PRJNA552034
SRR10260855	27.37	PRJNA552034
SRR10260856	62.84	PRJNA552034
SRR10260858	21.55	PRJNA552034
SRR10260860	90.97	PRJNA552034
SRR10260862	64.03	PRJNA552034
SRR10260864	52.14	PRJNA552034
SRR10260867	12.28	PRJNA552034
SRR10260869	53.02	PRJNA552034
SRR10260871	25.21	PRJNA552034
SRR10260873	71.27	PRJNA552034
SRR10260875	24.69	PRJNA552034
SRR10260877	53.14	PRJNA552034
SRR10260878	61.9	PRJNA552034
SRR10260880	29.78	PRJNA552034
SRR10260882	43.38	PRJNA552034
SRR10260884	23.14	PRJNA552034
SRR10260886	36.27	PRJNA552034
SRR10260889	46.87	PRJNA552034
SRR10260891	65.19	PRJNA552034
SRR10260893	57.35	PRJNA552034
SRR10260895	52.26	PRJNA552034
SRR10260897	48.85	PRJNA552034
SRR10260899	19.25	PRJNA552034
SRR10260900	27.58	PRJNA552034
SRR10260902	32.47	PRJNA552034
SRR10260904	45.08	PRJNA552034
SRR10260906	33.45	PRJNA552034
SRR10260908	76.84	PRJNA552034
SRR10260911	49.1	PRJNA552034
SRR10260913	39.71	PRJNA552034
SRR10260915	40.77	PRJNA552034
SRR10260917	61.63	PRJNA552034
SRR10260919	29.19	PRJNA552034
SRR10260921	49.29	PRJNA552034
SRR10260922	35.35	PRJNA552034
SRR10260924	37.08	PRJNA552034
SRR10260926	52.75	PRJNA552034
SRR10260928	35.34	PRJNA552034
SRR10260930	67.18	PRJNA552034
SRR10260933	46.93	PRJNA552034
SRR10260935	54.48	PRJNA552034
SRR10260937	45.16	PRJNA552034
SRR10260939	52.72	PRJNA552034
SRR10260941	44	PRJNA552034
SRR10260943	31.85	PRJNA552034
SRR9911343	40	PRJNA552905
SRR9911345	42.75	PRJNA552905
SRR9911347	41.66	PRJNA552905
SRR9911349	34.74	PRJNA552905
SRR9911351	39.17	PRJNA552905
SRR9911353	38.92	PRJNA552905
SRR9911355	38.68	PRJNA552905
SRR9911358	36.52	PRJNA552905
SRR9911359	39.23	PRJNA552905
SRR9911362	34.46	PRJNA552905
SRR9911364	40.29	PRJNA552905
SRR9911366	41.31	PRJNA552905
SRR9911367	35.02	PRJNA552905
SRR9911368	38	PRJNA552905
SRR9911369	37.78	PRJNA552905
SRR9911371	39.28	PRJNA552905
SRR9911372	35.15	PRJNA552905
SRR9911374	42.46	PRJNA552905
SRR9911376	39.02	PRJNA552905
SRR9911378	43.27	PRJNA552905
SRR13050735	100.1	PRJNA677995
SRR13050736	87.31	PRJNA677995
SRR13050737	76.15	PRJNA677995
SRR13050740	67.16	PRJNA677995
SRR13050741	93.18	PRJNA677995
SRR13050742	87.53	PRJNA677995
SRR13050744	71.45	PRJNA677995
SRR13050745	83.99	PRJNA677995
SRR13050746	96.27	PRJNA677995
SRR13050748	67.09	PRJNA677995
SRR13050750	74.26	PRJNA677995
SRR13050751	82.2	PRJNA677995
SRR7459234	68.35	SRP151732
SRR7459235	70.86	SRP151732
SRR7459236	62.95	SRP151732
SRR7459237	64.04	SRP151732
ERR1672130	18.47	ERP013521
ERR1672132	20.42	ERP013521
ERR1672134	19.57	ERP013521
ERR1672136	20.4	ERP013521
ERR1672138	20.9	ERP013521
ERR1672140	18.33	ERP013521
ERR1672142	19.53	ERP013521
ERR1672144	24.37	ERP013521
ERR1672146	18.44	ERP013521
ERR1672148	16.43	ERP013521
ERR1672150	15.67	ERP013521
ERR1672152	16.38	ERP013521
ERR1672154	17.82	ERP013521
ERR1672156	19.38	ERP013521
ERR1672158	19.08	ERP013521
ERR1672160	16.87	ERP013521
ERR1672162	19.04	ERP013521
ERR1672164	19.93	ERP013521
ERR1672166	19.76	ERP013521
ERR1672168	15.67	ERP013521
ERR1672170	15.8	ERP013521
ERR1672172	15.99	ERP013521
ERR1672174	17.56	ERP013521
ERR1672176	16.86	ERP013521
ERR1672178	16.57	ERP013521
ERR1672180	18.53	ERP013521
ERR1672182	24.78	ERP013521
ERR1672184	23.97	ERP013521
ERR1672187	18.7	ERP013521
ERR1672189	15.97	ERP013521
ERR1672191	17.57	ERP013521
ERR1672194	19.89	ERP013521
ERR1672196	16.94	ERP013521
ERR1672198	16.55	ERP013521
ERR1672202	18.56	ERP013521
ERR1672205	16.32	ERP013521
ERR1672207	18.07	ERP013521
ERR1672209	14.35	ERP013521
ERR1672211	15.98	ERP013521
ERR1672213	18.11	ERP013521
ERR1672215	22.52	ERP013521
ERR1672217	18.88	ERP013521
ERR1672219	21.02	ERP013521
ERR1672221	19.96	ERP013521
ERR1672223	20.9	ERP013521
ERR1672225	21.34	ERP013521
ERR1672227	19.22	ERP013521
ERR1672229	20.62	ERP013521
ERR1672231	25.56	ERP013521
ERR1672233	19.37	ERP013521
ERR1672235	17.34	ERP013521
ERR1672237	17	ERP013521
ERR1672239	17.77	ERP013521
ERR1672241	19.32	ERP013521
ERR1672243	20.89	ERP013521
ERR1672245	20.62	ERP013521
ERR1672247	17.53	ERP013521
ERR1672249	19.79	ERP013521
ERR1672251	20.79	ERP013521
ERR1672253	20.6	ERP013521
ERR1672255	16.37	ERP013521
ERR1672257	17.22	ERP013521
ERR1672259	17.37	ERP013521
ERR1672261	19.16	ERP013521
ERR1672263	18.29	ERP013521
ERR1672265	17.99	ERP013521
ERR1672267	19	ERP013521
ERR1672269	25.4	ERP013521
ERR1672271	24.54	ERP013521
ERR1672274	19.2	ERP013521
ERR1672276	17.98	ERP013521
ERR1672278	19.61	ERP013521
ERR1672281	22.13	ERP013521
ERR1672283	18.9	ERP013521
ERR1672285	17.89	ERP013521
ERR1672289	20.11	ERP013521
ERR1672292	17.65	ERP013521
ERR2396465	22.61	ERP013521
ERR2396467	25.19	ERP013521
ERR2396469	25.36	ERP013521
ERR1681424	19.35	ERP013521
ERR1681426	15.34	ERP013521
ERR1681428	17.06	ERP013521
ERR1681430	19.37	ERP013521
ERR1681432	24.08	ERP013521
ERR1681434	23.78	ERP013521
ERR1681436	20.2	ERP013521
ERR1681438	22.43	ERP013521
ERR1681440	18.02	ERP013521
ERR1681445	17.43	ERP013521
ERR1681447	19.19	ERP013521
ERR1681449	16.38	ERP013521
ERR1681451	21.85	ERP013521
ERR1681453	20.39	ERP013521
ERR1681455	21.78	ERP013521
ERR1681457	29.68	ERP013521
ERR1681462	15.3	ERP013521
ERR1681464	15.74	ERP013521
ERR1681466	18.92	ERP013521
ERR1681471	15.86	ERP013521
ERR1681473	16.87	ERP013521
ERR1681475	14.57	ERP013521
ERR1681477	14.76	ERP013521
ERR1681479	25.56	ERP013521
ERR1681481	21.86	ERP013521
ERR1681483	24.06	ERP013521
ERR1681485	19.47	ERP013521
ERR1681488	19.59	ERP013521
ERR1681490	18.54	ERP013521
ERR1681492	20.44	ERP013521
ERR1681494	17.46	ERP013521
ERR1681496	20.89	ERP013521
ERR1681498	19.4	ERP013521
ERR1681500	20.88	ERP013521
ERR1681502	29.08	ERP013521
ERR1681507	15.53	ERP013521
ERR1681509	15.85	ERP013521
ERR1681511	19.14	ERP013521
ERR1681516	17.12	ERP013521
ERR1681518	18.2	ERP013521
ERR1681520	15.72	ERP013521
ERR1681522	16.01	ERP013521
ERR2496951	21.34	ERP013521
ERR2496953	23.85	ERP013521
ERR2496955	23.89	ERP013521
ERR2496959	13.08	ERP013521
ERR2496961	12.56	ERP013521
ERR2496963	12.14	ERP013521
ERR2496965	10.08	ERP013521
ERR2496967	10.71	ERP013521
ERR2436312	13.94	ERP013521
ERR2436314	13.44	ERP013521
ERR2436316	12.95	ERP013521
ERR2436318	10.74	ERP013521
ERR2436320	11.47	ERP013521
SRR5836923	60.74	PRJNA391455
SRR5836925	64.25	PRJNA391455
SRR5836927	73.67	PRJNA391455
SRR5836929	61.05	PRJNA391455
SRR5836931	67.97	PRJNA391455
SRR5836933	91.59	PRJNA391455
SRR5836935	67.52	PRJNA391455
SRR5836937	65.75	PRJNA391455
SRR5836939	62.41	PRJNA391455
SRR5836941	74.88	PRJNA391455
SRR5836944	62.65	PRJNA391455
SRR5836946	74.73	PRJNA391455
SRR5836948	81.41	PRJNA391455
SRR5836950	70.56	PRJNA391455
SRR5836952	74.33	PRJNA391455
SRR5836954	63.1	PRJNA391455
SRR5836955	67.26	PRJNA391455
SRR5836957	75.32	PRJNA391455
SRR5836959	71.89	PRJNA391455
SRR5836961	58.96	PRJNA391455
SRR5836964	56.49	PRJNA391455
SRR5836966	63.5	PRJNA391455
SRR5836968	43.68	PRJNA391455
SRR5836970	61.56	PRJNA391455
SRR5836971	76.16	PRJNA391455
SRR5836973	85	PRJNA391455
SRR5836975	69.02	PRJNA391455
SRR5836977	60.57	PRJNA391455
SRR5836979	83.95	PRJNA391455
SRR5836982	61.38	PRJNA391455
SRR5836984	72.72	PRJNA391455
SRR5836986	77.31	PRJNA391455
SRR5836988	60.89	PRJNA391455
SRR5836990	60.02	PRJNA391455
SRR5836992	61.95	PRJNA391455
SRR5836994	52.98	PRJNA391455
SRR5836996	81.89	PRJNA391455
SRR5836998	76.33	PRJNA391455
SRR5837000	54.58	PRJNA391455
SRR5837002	62.19	PRJNA391455
SRR5837004	72.51	PRJNA391455
SRR5837006	50.37	PRJNA391455
SRR5837008	83.01	PRJNA391455
SRR5837010	65.1	PRJNA391455
SRR5837012	60.9	PRJNA391455
SRR5837013	90.41	PRJNA391455
SRR5837015	56.46	PRJNA391455
SRR5837017	73.82	PRJNA391455
SRR5837019	79.3	PRJNA391455
SRR5837021	84.84	PRJNA391455
SRR5837023	88.24	PRJNA391455
SRR5837026	57.92	PRJNA391455
SRR5837028	92.38	PRJNA391455
SRR5837030	70.26	PRJNA391455
SRR5837032	61.57	PRJNA391455
SRR5837034	74.45	PRJNA391455
SRR5837035	57.94	PRJNA391455
SRR5837037	93.23	PRJNA391455
SRR5837039	75.48	PRJNA391455
SRR5837041	86.47	PRJNA391455
SRR5837043	64.91	PRJNA391455
SRR5837046	60.01	PRJNA391455
SRR10351559	70.83	PRJNA579792
SRR10351561	52.16	PRJNA579792
SRR10351563	20.4	PRJNA579792
SRR10351565	77.11	PRJNA579792
SRR10351569	59.44	PRJNA579792
SRR10351572	69.51	PRJNA579792
SRR10351574	74.23	PRJNA579792
SRR10351579	42.32	PRJNA579792
SRR10351581	69.61	PRJNA579792
SRR10351584	40.95	PRJNA579792
SRR10351692	86.7	PRJNA579792
SRR10351694	65.15	PRJNA579792
SRR10351696	59.17	PRJNA579792
SRR10351700	59.99	PRJNA579792
SRR10351702	35.2	PRJNA579792
SRR10351704	43.8	PRJNA579792
SRR10351706	53.53	PRJNA579792
SRR10351709	73.35	PRJNA579792
SRR10351711	37.07	PRJNA579792
SRR10351713	32.84	PRJNA579792
SRR10351715	63.56	PRJNA579792
SRR10351720	63.11	PRJNA579792
SRR10351723	63.41	PRJNA579792
SRR10351725	55.06	PRJNA579792
SRR10351727	73.33	PRJNA579792
SRR10351731	40.06	PRJNA579792
SRR10351733	63.19	PRJNA579792
SRR10351736	54.84	PRJNA579792
SRR10351738	17.53	PRJNA579792
SRR10351743	66.45	PRJNA579792
SRR10351745	30.34	PRJNA579792
SRR10351747	52.28	PRJNA579792
SRR10351749	55.5	PRJNA579792
SRR10351751	26.61	PRJNA579792
SRR10351756	70.94	PRJNA579792
SRR10351759	81.65	PRJNA579792
SRR10351762	40.06	PRJNA579792
SRR10351765	55.64	PRJNA579792
SRR10351767	69.26	PRJNA579792
SRR10351769	56.6	PRJNA579792
SRR10351771	54.41	PRJNA579792
SRR10351776	53.44	PRJNA579792
SRR10351778	74.46	PRJNA579792
SRR10351780	67.89	PRJNA579792
SRR10351784	77.11	PRJNA579792
SRR10351787	38.31	PRJNA579792
SRR10351789	72.27	PRJNA579792
SRR10351792	69.23	PRJNA579792
SRR10351798	49.91	PRJNA579792
SRR10351801	39.89	PRJNA579792
SRR10351803	28.4	PRJNA579792
SRR10351805	54.13	PRJNA579792
SRR10351807	56.54	PRJNA579792
SRR10351811	50.43	PRJNA579792
SRR11352506	166.57	PRJNA613479-PRJNA503860
SRR11352507	175.14	PRJNA613479-PRJNA503860
SRR11352508	127.48	PRJNA613479-PRJNA503860
SRR11352509	142.45	PRJNA613479-PRJNA503860
SRR11352510	120.21	PRJNA613479-PRJNA503860
SRR11352532	119.36	PRJNA613479-PRJNA503860
SRR11352512	137.9	PRJNA613479-PRJNA503860
SRR11352513	159.62	PRJNA613479-PRJNA503860
SRR11352514	150.49	PRJNA613479-PRJNA503860
SRR11352515	186.67	PRJNA613479-PRJNA503860
SRR11352516	141.97	PRJNA613479-PRJNA503860
SRR11352517	95.73	PRJNA613479-PRJNA503860
SRR11352518	96.96	PRJNA613479-PRJNA503860
SRR11352519	123.79	PRJNA613479-PRJNA503860
SRR11352520	155.57	PRJNA613479-PRJNA503860
SRR11352521	101.99	PRJNA613479-PRJNA503860
SRR11352522	107.79	PRJNA613479-PRJNA503860
SRR11352523	197.16	PRJNA613479-PRJNA503860
SRR11352524	132.11	PRJNA613479-PRJNA503860
SRR11352525	138.87	PRJNA613479-PRJNA503860
SRR11352526	161.29	PRJNA613479-PRJNA503860
SRR11352527	102.07	PRJNA613479-PRJNA503860
SRR11352528	127.75	PRJNA613479-PRJNA503860
SRR11352529	57.91	PRJNA613479-PRJNA503860
SRR11352530	60.57	PRJNA613479-PRJNA503860
SRR11352531	137.05	PRJNA613479-PRJNA503860
SRR11451562	11.55	PRJNA616374-PRJNA503860
SRR11451559	14.06	PRJNA616374-PRJNA503860
SRR11451560	16.39	PRJNA616374-PRJNA503860
SRR13123341	98.5	PRJNA680382
SRR13123352	110.32	PRJNA680382
SRR13123338	138.06	PRJNA680382
SRR13123347	98.91	PRJNA680382
SRR15461486	63	PRJNA752630
SRR15461478	64.6	PRJNA752630
SRR15461494	54.61	PRJNA752630
SRR15461479	66.27	PRJNA752630
SRR15464857	83.38	PRJNA752630
SRR15464856	81.48	PRJNA752630
SRR15464855	78.46	PRJNA752630
SRR15464854	75.47	PRJNA752630
SRR15464852	74.56	PRJNA752630
SRR15464851	75.93	PRJNA752630
SRR15464850	83.92	PRJNA752630
SRR15464849	82.29	PRJNA752630
SRR15464848	99.13	PRJNA752630
SRR15464847	89.09	PRJNA752630
SRR15461481	72.79	PRJNA752630
SRR15461493	66.49	PRJNA752630
SRR15461492	55.51	PRJNA752630
SRR15461491	80.04	PRJNA752630
SRR15461490	60.56	PRJNA752630
SRR15461489	67.02	PRJNA752630
SRR15461497	52.05	PRJNA752630
SRR15461495	77.94	PRJNA752630
SRR15464837	83.4	PRJNA752630
SRR15464836	74.99	PRJNA752630
SRR15464853	96.56	PRJNA752630
SRR15464842	117.13	PRJNA752630
SRR15464865	56.62	PRJNA752630
SRR15464864	79.98	PRJNA752630
SRR15461472	74.99	PRJNA752630
SRR15461471	70.5	PRJNA752630
SRR15461475	71.7	PRJNA752630
SRR15461473	66.75	PRJNA752630
SRR15461508	94.61	PRJNA752630
SRR15461480	64.71	PRJNA752630
SRR15461496	92.95	PRJNA752630
SRR15461507	56.6	PRJNA752630
SRR15461474	66.95	PRJNA752630
SRR15461485	73.59	PRJNA752630
SRR15461452	82.95	PRJNA752630
SRR15461463	75.97	PRJNA752630
SRR15461430	73.03	PRJNA752630
SRR15461441	60.13	PRJNA752630
SRR15461499	49.23	PRJNA752630
SRR15461488	61.68	PRJNA752630
SRR15461498	77.85	PRJNA752630
SRR15461504	58.19	PRJNA752630
SRR15464838	49.45	PRJNA752630
SRR15464839	90.08	PRJNA752630
SRR15464840	39.58	PRJNA752630
SRR15464841	47.89	PRJNA752630
SRR15464843	84.27	PRJNA752630
SRR15464844	103.08	PRJNA752630
SRR15464845	103.69	PRJNA752630
SRR15464846	79.32	PRJNA752630
SRR15461502	75.11	PRJNA752630
SRR15461487	58.18	PRJNA752630
SRR15461503	58.05	PRJNA752630
SRR15461506	71.73	PRJNA752630
SRR15461423	84.53	PRJNA752630
SRR15461476	50.71	PRJNA752630
SRR15461477	63.01	PRJNA752630
SRR15464858	86.84	PRJNA752630
SRR15464859	67.99	PRJNA752630
SRR15461500	57.45	PRJNA752630
SRR15461501	66.29	PRJNA752630
SRR15464862	80.03	PRJNA752630
SRR15464863	60.45	PRJNA752630
SRR15464860	80.09	PRJNA752630
SRR15464861	82.56	PRJNA752630
SRR15464834	83.18	PRJNA752630
SRR15464835	108.74	PRJNA752630
SRR15464832	114.51	PRJNA752630
SRR15464833	50	PRJNA752630
SRR15461482	61.6	PRJNA752630
SRR15461483	70.17	PRJNA752630
SRR15461505	67.71	PRJNA752630
SRR15461484	74.32	PRJNA752630
SRR17139200	71.39	PRJNA786469
SRR17139202	79.43	PRJNA786469
SRR17139204	73.23	PRJNA786469
SRR17139206	45.05	PRJNA786469
SRR17139208	66.76	PRJNA786469
SRR17139294	83.57	PRJNA786469
SRR17139296	85.45	PRJNA786469
SRR17139299	60.32	PRJNA786469
SRR17139301	86.15	PRJNA786469
SRR17139303	80.94	PRJNA786469
SRR17139305	85.81	PRJNA786469
SRR17139307	86.98	PRJNA786469
SRR17139310	52.07	PRJNA786469
SRR17139312	74	PRJNA786469
SRR17139314	48.2	PRJNA786469
SRR17139316	79.76	PRJNA786469
SRR17139318	65.81	PRJNA786469
SRR17139321	62.02	PRJNA786469
SRR17139325	57.47	PRJNA786469
SRR17139327	94.86	PRJNA786469
SRR17139329	66.79	PRJNA786469
SRR17139332	94.07	PRJNA786469
SRR17139338	82.06	PRJNA786469
SRR1923456	18.13	TBCL
SRR1924067	21.79	TBCL
SRR1927957	21.6	TBCL
SRR1923045	18.65	TBCL
SRR1923630	18.94	TBCL
SRR1923072	16.69	TBCL
SRR1927945	20.09	TBCL
SRR1927985	16.48	TBCL
SRR1928090	18.38	TBCL
SRR1922889	17.35	TBCL
SRR1928095	24.03	TBCL
SRR1923336	24.24	TBCL
SRR1927975	25.38	TBCL
SRR1923041	27.28	TBCL
SRR1922998	21.58	TBCL
SRR1928113	21.01	TBCL
SRR1923639	20.82	TBCL
SRR1923243	17.52	TBCL
SRR1928077	18.88	TBCL
SRR1928038	21.52	TBCL
SRR1928106	21.93	TBCL
SRR1923003	17.24	TBCL
SRR1923255	18.54	TBCL
SRR1927988	16.8	TBCL
SRR1928123	15.55	TBCL
SRR1927972	20.35	TBCL
SRR1923150	21.4	TBCL
SRR1928059	24.76	TBCL
SRR1922890	16.79	TBCL
SRR1928074	20.44	TBCL
SRR1927936	11.64	TBCL
SRR1928050	25.68	TBCL
SRR1922999	17.04	TBCL
SRR1928120	23.26	TBCL
SRR1923107	21.1	TBCL
SRR1927949	24.36	TBCL
SRR1923347	26.24	TBCL
SRR1928086	14.55	TBCL
SRR1927956	20.56	TBCL
SRR1923211	20.66	TBCL
SRR1923651	9.77	TBCL
SRR1928073	29.49	TBCL
SRR1923693	23.98	TBCL
SRR1923319	28.16	TBCL
SRR1927990	21.8	TBCL
SRR1923745	22.9	TBCL
SRR1928069	26.82	TBCL
SRR1923114	17.46	TBCL
SRR1923210	29.85	TBCL
SRR1928049	21.02	TBCL
SRR1928043	27.98	TBCL
SRR1928052	27.28	TBCL
SRR1923198	24.84	TBCL
SRR1923140	36.17	TBCL
SRR1923257	25.49	TBCL
SRR1923315	19.09	TBCL
SRR1923547	18.34	TBCL
SRR1928116	23.36	TBCL
SRR1923105	14.63	TBCL
SRR1928047	12.14	TBCL
SRR1923421	26.99	TBCL
SRR2180273	18.89	TBCL
SRR2175571	15.99	TBCL
SRR2180287	18.38	TBCL
SRR2180268	21.24	TBCL
SRR2175581	19.65	TBCL
SRR2180274	26.18	TBCL
SRR2175580	13.89	TBCL
SRR2175592	5.87	TBCL
SRR2175589	30.37	TBCL
SRR2175626	27.44	TBCL
SRR2175604	23.34	TBCL
SRR2180286	21.15	TBCL
SRR2180350	25.68	TBCL
SRR2180460	29.12	TBCL
SRR2180276	31.95	TBCL
SRR2180281	16.54	TBCL
SRR1927961	26.7	TBCL
SRR1928078	24	TBCL
SRR1927946	22.6	TBCL
SRR1927964	24.82	TBCL
SRR1923367	18.61	TBCL
SRR1923145	25.8	TBCL
SRR1928118	17.1	TBCL
SRR1923987	21.49	TBCL
SRR1923213	24.42	TBCL
SRR1923004	20.31	TBCL
SRR1928125	17.55	TBCL
SRR1923229	25.81	TBCL
SRR1928126	21.87	TBCL
SRR1927967	19.95	TBCL
SRR1923161	21.09	TBCL
SRR1923401	23.24	TBCL
SRR1923163	16.56	TBCL
SRR1923291	18.4	TBCL
SRR1928036	26.43	TBCL
SRR1923036	21.51	TBCL
SRR1927943	18.82	TBCL
SRR1927979	12.6	TBCL
SRR1928071	17.42	TBCL
SRR7780732	53.39	SRP159481
SRR7780734	50.63	SRP159481
SRR7780736	44.31	SRP159481
SRR7780738	50.17	SRP159481
SRR7780739	51.2	SRP159481
SRR7780741	44.76	SRP159481
SRR7780743	60.66	SRP159481
SRR7780745	51.26	SRP159481
SRR7780748	58.62	SRP159481
SRR7780750	60.53	SRP159481
SRR7780754	57.13	SRP159481
SRR7780755	54.71	SRP159481
SRR7780756	61.97	SRP159481
SRR7780766	50.87	SRP159481
SRR7780770	53.97	SRP159481
SRR7780772	53.82	SRP159481
SRR7780779	43.77	SRP159481
SRR7780783	49.92	SRP159481
SRR7780787	50.05	SRP159481
SRR7780791	68.09	SRP159481
SRR7780795	38.02	SRP159481
SRR7780803	53.96	SRP159481
SRR7780811	61.72	SRP159481
SRR7780813	65.36	SRP159481
SRR7780815	47.93	SRP159481
SRR7780820	48.64	SRP159481
SRR7780829	57.35	SRP159481
SRR7780831	47.66	SRP159481
SRR7780835	52.5	SRP159481
SRR7780837	59.83	SRP159481
SRR7780846	51.1	SRP159481
SRR7780848	57.22	SRP159481
SRR7780850	46.26	SRP159481
SRR7780852	47.14	SRP159481
SRR7780857	56.13	SRP159481
SRR7780858	62.5	SRP159481
SRR7780860	56.24	SRP159481
SRR7780862	68.09	SRP159481
SRR7780864	68.03	SRP159481
SRR7780866	56.83	SRP159481
SRR7780868	59.35	SRP159481
SRR7780870	65.01	SRP159481
SRR7780877	35.8	SRP159481
SRR7780879	67.07	SRP159481
SRR7780882	51.09	SRP159481
SRR7780886	50.81	SRP159481
SRR7780888	48.91	SRP159481
SRR7780890	47.67	SRP159481
SRR7780896	56.06	SRP159481
SRR7780899	52.63	SRP159481
SRR7780901	58.84	SRP159481
SRR7780903	54.82	SRP159481
SRR7780908	29.5	SRP159481
SRR7780910	49.3	SRP159481
SRR7780912	46.86	SRP159481
SRR7780914	47.84	SRP159481
SRR7780916	48.79	SRP159481
SRR7780921	63.09	SRP159481
SRR7780925	61.35	SRP159481
SRR7780927	63.59	SRP159481
SRR7780930	33.71	SRP159481
SRR7780932	43.57	SRP159481
SRR7780938	58.92	SRP159481
SRR7780940	58.16	SRP159481
SRR7780942	57.96	SRP159481
SRR7780953	67.56	SRP159481
SRR7780957	45.76	SRP159481
SRR7780959	51.87	SRP159481
SRR7780961	54.57	SRP159481
SRR7780962	62	SRP159481
SRR7780964	55.04	SRP159481
SRR7780966	63.39	SRP159481
SRR7780968	56.84	SRP159481
SRR7780971	37.13	SRP159481
SRR7780975	62.65	SRP159481
SRR7780977	55.21	SRP159481
SRR7780982	63.98	SRP159481
SRR7780984	50.58	SRP159481
SRR7780988	60.28	SRP159481
SRR7780993	45.34	SRP159481
SRR7780995	59.13	SRP159481
SRR7780997	56.96	SRP159481
SRR7781001	50.06	SRP159481
SRR7781002	55.19	SRP159481
SRR7781004	59.53	SRP159481
SRR7781008	51.1	SRP159481
SRR7781011	61.76	SRP159481
SRR7781013	62.59	SRP159481
SRR7781019	52.38	SRP159481
SRR7781021	49.88	SRP159481
SRR7781027	45.98	SRP159481
SRR7781031	35.04	SRP159481
SRR7781033	63.76	SRP159481
SRR7781035	47.99	SRP159481
SRR7781037	61.57	SRP159481
SRR7781043	56.28	SRP159481
SRR7781045	52.55	SRP159481
SRR7781047	55.75	SRP159481
SRR7781054	55.38	SRP159481
SRR7781056	54.01	SRP159481
SRR7781058	53.66	SRP159481
SRR7781064	52.84	SRP159481
SRR7781066	54.91	SRP159481
SRR7781071	60.95	SRP159481
SRR7781080	57.66	SRP159481
SRR7781082	55.62	SRP159481
SRR7781084	47.09	SRP159481
SRR7781086	61.66	SRP159481
SRR7781091	48.02	SRP159481
SRR7781093	49.99	SRP159481
SRR7781097	46.7	SRP159481
SRR7781099	52.82	SRP159481
SRR7781101	68.33	SRP159481
SRR7781103	61.53	SRP159481
SRR7781105	65.95	SRP159481
SRR7781107	59.82	SRP159481
SRR7781109	64.28	SRP159481
