# Supplementary material for: The Genetic Landscape of Canine Tumors: Insights from the Canine Cancer Genome Atlas (CCGA)
Source: Research Square preprint supplement (doi:10.21203/rs.3.rs-5025541/v1), 2024-09-19
Supplement: Supplementary file 16 [file d4f92635b6fb1300d9901dd6.xlsx]

## Sheet: CNA Burden
	0%	25%	50%	75%	100%
ALL	0.00516671	0.0602601	0.210292	0.389267	0.997818
Melanoma	0.00983881	0.229783	0.309469	0.38784	0.992683
Hemangiosarcoma	0.0116296	0.115956	0.293604	0.411681	0.973984
Glioma	0.0138164	0.172488	0.267188	0.384622	0.991138
Osteosarcoma	0.00638016	0.264384	0.456702	0.766185	0.99621
BCL	0.00644839	0.0521093	0.0907361	0.148034	0.997572
TCL	0.00949108	0.0635734	0.139516	0.274701	0.996676
Urinary Carcinoma	0.0138873	0.0157028	0.0175183	0.0193338	0.0211493
Mammary Tumor	0.00926229	0.0269702	0.0479903	0.161483	0.9944
Mast Cell Tumor	0.00516671	0.0151478	0.0610121	0.295456	0.997818
Pulmonary Adenocarcinoma	0.126064	0.26271	0.305196	0.427788	0.572515
