# Supplementary material for: The Genetic Landscape of Canine Tumors: Insights from the Canine Cancer Genome Atlas (CCGA)
Source: Research Square preprint supplement (doi:10.21203/rs.3.rs-5025541/v1), 2024-09-19
Supplement: Supplementary file 17 [file e7cd4d29d8e79cd0b80c6957.xlsx]

## Sheet: Mammary Tumor
Tumor_Sample_Barcode	Chromosome	Start_Position	End_Position	Reference_Allele	Tumor_Seq_Allele2	Hugo_Symbol	Variant_Classification	tx	exon	txChange	aaChange	Variant_Type	Func.refGene	Gene.refGene	GeneDetail.refGene	ExonicFunc.refGene	AAChange.refGene	Project	TumorType
SRR7780733-SRR7780734	chr21	23622885	23622885	A	T	RNF169	Splice_Site					SNP	splicing	RNF169	ENSCAFT00000008805.5:exon2:c.588+2T>A			SRP159481	Mammary Tumor
SRR7780735-SRR7780736	chr16	5319750	5319750	G	A	TPK1	Splice_Site					SNP	splicing	TPK1	ENSCAFT00000069525.1:exon2:c.44-1G>A;ENSCAFT00000071514.1:exon2:c.44-1G>A;ENSCAFT00000088628.1:exon2:c.81-1G>A;ENSCAFT00000039734.3:exon2:c.47-1G>A			SRP159481	Mammary Tumor
SRR7780737-SRR7780738	chr4	59476135	59476135	G	A	CSNK1A1	Splice_Site					SNP	splicing	CSNK1A1	ENSCAFT00000087178.1:exon10:c.1090+1G>A;ENSCAFT00000091323.1:exon10:c.1090+1G>A;ENSCAFT00000068113.1:exon9:c.1006+1G>A;ENSCAFT00000029053.4:exon10:c.1090+1G>A;ENSCAFT00000064297.1:exon10:c.1090+1G>A			SRP159481	Mammary Tumor
SRR7780771-SRR7780770	chr12	9247581	9247581	T	A	LRFN2	Splice_Site					SNP	splicing	LRFN2	ENSCAFT00000078880.1:exon2:UTR5;ENSCAFT00000044697.2:exon2:c.57-2A>T;ENSCAFT00000002460.4:exon3:UTR5;ENSCAFT00000072816.1:exon2:c.96-2A>T			SRP159481	Mammary Tumor
SRR7780771-SRR7780770	chr18	47136506	47136507	TG	T	MRGPRG	Splice_Site						splicing	MRGPRG	ENSCAFT00000016454.4:exon2:r.spl			SRP159481	Mammary Tumor
SRR7780773-SRR7780772	chr8	11745547	11745547	G	T	AKAP6	Splice_Site					SNP	splicing	AKAP6	ENSCAFT00000020907.4:exon8:c.2876+1G>T;ENSCAFT00000086209.1:exon7:c.2624+1G>T;ENSCAFT00000082153.1:exon8:c.2876+1G>T			SRP159481	Mammary Tumor
SRR7780786-SRR7780896	chr1	14652625	14652625	C	A	RELCH	Splice_Site					SNP	splicing	RELCH	ENSCAFT00000060585.1:exon7:c.1066-1G>T;ENSCAFT00000089981.1:exon7:c.1066-1G>T;ENSCAFT00000000134.4:exon7:c.1066-1G>T;ENSCAFT00000067951.1:exon6:c.994-1G>T;ENSCAFT00000090127.1:exon7:c.1066-1G>T;ENSCAFT00000081474.1:exon7:c.1066-1G>T;ENSCAFT00000076732.1:exon7:c.1066-1G>T			SRP159481	Mammary Tumor
SRR7780788-SRR7780791	chr1	99086891	99086891	G	C	IARS1	Splice_Site					SNP	splicing	IARS1	ENSCAFT00000003663.4:exon19:c.1872-1G>C;ENSCAFT00000080250.1:exon19:c.1872-1G>C			SRP159481	Mammary Tumor
SRR7780792-SRR7780795	chr24	3323284	3323284	A	C	NAA20	Splice_Site					SNP	splicing	NAA20	ENSCAFT00000047384.2:exon2:c.78+2T>G;ENSCAFT00000067537.1:exon2:c.39+2T>G;ENSCAFT00000069872.1:exon2:c.216+2T>G;ENSCAFT00000078433.1:exon2:c.78+2T>G			SRP159481	Mammary Tumor
SRR7780814-SRR7780815	chr12	10694773	10694773	G	A	TAF8	Splice_Site					SNP	splicing	TAF8	ENSCAFT00000002559.4:exon4:c.364+1G>A;ENSCAFT00000061215.1:exon4:c.364+1G>A;ENSCAFT00000090529.1:exon4:c.175+1G>A			SRP159481	Mammary Tumor
SRR7780843-SRR7781004	chr5	62957047	62957047	C	A	CLSTN1	Splice_Site					SNP	splicing	CLSTN1	ENSCAFT00000073832.1:exon9:c.746-1G>T;ENSCAFT00000044983.3:exon8:c.716-1G>T;ENSCAFT00000065286.1:exon9:c.746-1G>T;ENSCAFT00000031393.4:exon6:c.650-1G>T			SRP159481	Mammary Tumor
SRR7780847-SRR7780846	chr33	24827317	24827317	A	G	POLQ	Splice_Site					SNP	splicing	POLQ	ENSCAFT00000018256.4:exon7:c.1335+2T>C			SRP159481	Mammary Tumor
SRR7780859-SRR7780858	chr1	37852979	37852979	T	A	ADGB	Splice_Site					SNP	splicing	ADGB	ENSCAFT00000000533.5:exon21:c.2632+2T>A;ENSCAFT00000000535.4:exon21:c.2632+2T>A;ENSCAFT00000067657.1:exon20:c.2492+2T>A;ENSCAFT00000067657.1:exon20:UTR3			SRP159481	Mammary Tumor
SRR7780859-SRR7780858	chr1	41421186	41421186	G	A	MTHFD1L	Splice_Site					SNP	splicing	MTHFD1L	ENSCAFT00000000656.4:exon21:c.2139+1G>A;ENSCAFT00000066094.1:exon21:c.2142+1G>A			SRP159481	Mammary Tumor
SRR7780861-SRR7780862	chr8	43247452	43247452	A	G	SLC39A9	Splice_Site					SNP	splicing	SLC39A9	ENSCAFT00000066653.1:exon3:c.97-2A>G;ENSCAFT00000026247.4:exon3:c.97-2A>G;ENSCAFT00000087359.1:exon3:c.97-2A>G;ENSCAFT00000062505.1:exon3:c.97-2A>G			SRP159481	Mammary Tumor
SRR7780865-SRR7780864	chr37	28688166	28688166	T	A	FARSB	Splice_Site					SNP	splicing	FARSB	ENSCAFT00000025570.5:exon13:c.1171-2A>T;ENSCAFT00000065964.1:exon13:c.1171-2A>T			SRP159481	Mammary Tumor
SRR7780869-SRR7780868	chr9	18285536	18285536	G	A	MAP3K14	Splice_Site					SNP	splicing	MAP3K14	ENSCAFT00000021854.4:exon5:c.1156-1G>A;ENSCAFT00000075933.1:exon5:c.1156-1G>A			SRP159481	Mammary Tumor
SRR7780889-SRR7780888	chr13	59243734	59243734	C	T	SULT1B1	Splice_Site					SNP	splicing	SULT1B1	ENSCAFT00000004591.4:exon2:c.149-1G>A			SRP159481	Mammary Tumor
SRR7780902-SRR7780901	chr27	26433060	26433060	T	G	SLCO1B3	Splice_Site					SNP	splicing	SLCO1B3	ENSCAFT00000019638.4:exon8:c.731-2A>C;ENSCAFT00000071555.1:exon9:c.635-2A>C;ENSCAFT00000086787.1:exon7:c.632-2A>C;ENSCAFT00000077055.1:exon7:c.584-2A>C;ENSCAFT00000093915.1:exon8:c.731-2A>C;ENSCAFT00000079821.1:exon8:c.731-2A>C			SRP159481	Mammary Tumor
SRR7780917-SRR7780916	chr22	60219777	60219777	A	T	TUBGCP3	Splice_Site					SNP	splicing	TUBGCP3	ENSCAFT00000065164.1:exon5:c.548+2T>A;ENSCAFT00000087981.1:exon5:c.548+2T>A;ENSCAFT00000009956.3:exon5:c.548+2T>A			SRP159481	Mammary Tumor
SRR7780920-SRR7780921	chr5	32563091	32563091	C	T	TP53	Splice_Site					SNP	splicing	TP53	ENSCAFT00000026465.4:exon8:c.747-1G>A;ENSCAFT00000081814.1:exon8:c.939-1G>A;ENSCAFT00000086831.1:exon6:c.678-1G>A			SRP159481	Mammary Tumor
SRR7780924-SRR7780925	chr1	28581743	28581743	G	T	PDE7B	Splice_Site					SNP	splicing	PDE7B	ENSCAFT00000000378.4:exon2:c.82+1G>T			SRP159481	Mammary Tumor
SRR7780931-SRR7780930	chr20	9015334	9015334	T	G	SRGAP3	Splice_Site					SNP	splicing	SRGAP3	ENSCAFT00000008920.4:exon2:c.260+2T>G;ENSCAFT00000065734.1:exon2:c.260+2T>G			SRP159481	Mammary Tumor
SRR7780933-SRR7780932	chr25	47992509	47992509	C	T	COL6A3	Splice_Site					SNP	splicing	COL6A3	ENSCAFT00000019411.5:exon34:c.7162+1G>A;ENSCAFT00000019420.5:exon34:c.7162+1G>A;ENSCAFT00000084677.1:exon33:c.6544+1G>A;ENSCAFT00000019426.4:exon31:c.5341+1G>A;ENSCAFT00000085717.1:exon31:c.5341+1G>A			SRP159481	Mammary Tumor
SRR7780941-SRR7780940	chr9	52694580	52694580	T	C	PRRC2B	Splice_Site					SNP	splicing	PRRC2B	ENSCAFT00000088857.1:exon4:c.397-2A>G;ENSCAFT00000031676.4:exon4:c.397-2A>G;ENSCAFT00000070320.1:exon4:c.397-2A>G			SRP159481	Mammary Tumor
SRR7780952-SRR7781054	chr26	15966789	15966789	G	A	BICDL1	Splice_Site					SNP	splicing	BICDL1	ENSCAFT00000016103.5:exon2:c.268-1G>A			SRP159481	Mammary Tumor
SRR7780967-SRR7780964	chr16	5659363	5659363	C	T	ARHGEF5	Splice_Site					SNP	splicing	ARHGEF5	ENSCAFT00000005632.4:exon7:c.3713+1G>A;ENSCAFT00000072787.1:exon7:c.3713+1G>A;ENSCAFT00000080746.1:exon6:c.3713+1G>A			SRP159481	Mammary Tumor
SRR7780994-SRR7780995	chr25	43024191	43024191	T	A	PSMD1	Splice_Site					SNP	splicing	PSMD1	ENSCAFT00000082796.1:exon8:c.942+2T>A;ENSCAFT00000044920.3:exon8:c.942+2T>A;ENSCAFT00000017372.5:exon9:c.942+2T>A;ENSCAFT00000092793.1:exon8:c.987+2T>A			SRP159481	Mammary Tumor
SRR7780994-SRR7780995	chr27	36875642	36875642	A	C	A2ML1	Splice_Site					SNP	splicing	A2ML1	ENSCAFT00000021984.5:exon6:c.646+2T>G;ENSCAFT00000085099.1:exon5:c.511+2T>G;ENSCAFT00000072874.1:exon5:c.511+2T>G;ENSCAFT00000049265.2:exon3:c.295+2T>G			SRP159481	Mammary Tumor
SRR7781020-SRR7781021	chr21	5875691	5875695	GTACT	G	SESN3	Splice_Site						splicing	SESN3				SRP159481	Mammary Tumor
SRR7781034-SRR7781035	chr24	27289022	27289022	A	C	PPP1R16B	Splice_Site					SNP	splicing	PPP1R16B	ENSCAFT00000014337.4:exon9:c.899-2A>C;ENSCAFT00000091233.1:exon8:c.773-2A>C			SRP159481	Mammary Tumor
SRR7781059-SRR7781056	chr4	2757533	2757533	C	T	RYR2	Splice_Site					SNP	splicing	RYR2	ENSCAFT00000015962.4:exon8:c.803+1G>A			SRP159481	Mammary Tumor
SRR7781065-SRR7781064	chr12	32981169	32981169	G	C	FAM135A	Splice_Site					SNP	splicing	FAM135A	ENSCAFT00000062090.1:exon10:c.823+1G>C;ENSCAFT00000004092.5:exon10:c.823+1G>C;ENSCAFT00000091281.1:exon7:c.847+1G>C;ENSCAFT00000004094.5:exon10:c.823+1G>C;ENSCAFT00000092597.1:exon9:c.649+1G>C;ENSCAFT00000086696.1:exon10:c.823+1G>C;ENSCAFT00000092093.1:exon7:c.838+1G>C;ENSCAFT00000083584.1:exon6:c.694+1G>C;ENSCAFT00000077083.1:exon3:c.529+1G>C			SRP159481	Mammary Tumor
SRR7781065-SRR7781064	chr14	51463813	51463813	A	T	DOCK4	Splice_Site					SNP	splicing	DOCK4	ENSCAFT00000067832.1:exon45:c.4797+2T>A;ENSCAFT00000005304.4:exon44:c.4770+2T>A;ENSCAFT00000068186.1:exon45:c.4797+2T>A;ENSCAFT00000076998.1:exon43:c.4671+2T>A;ENSCAFT00000090259.1:exon42:c.4482+2T>A;ENSCAFT00000075663.1:exon14:c.1419+2T>A;ENSCAFT00000068435.1:exon45:c.4797+2T>A			SRP159481	Mammary Tumor
SRR7781065-SRR7781064	chr24	14243337	14243337	T	C	HAO1	Splice_Site					SNP	splicing	HAO1	ENSCAFT00000009507.4:exon5:c.813+2T>C			SRP159481	Mammary Tumor
SRR7781067-SRR7781066	chr22	5758108	5758109	TA	T	GTF2F2	Splice_Site						splicing	GTF2F2	ENSCAFT00000007315.4:exon8:r.spl			SRP159481	Mammary Tumor
SRR9911348-SRR9911349	chr10	35611814	35611814	C	A	SULT1C3	Splice_Site					SNP	splicing	SULT1C3	ENSCAFT00000003261.3:exon8:c.803-1G>T;ENSCAFT00000083721.1:exon8:c.857-1G>T			PRJNA552905	Mammary Tumor
SRR9911348-SRR9911349	chr4	35929630	35929630	C	A	GRK6	Splice_Site					SNP	splicing	GRK6	ENSCAFT00000019321.5:exon14:c.1405-1G>T;ENSCAFT00000025992.4:exon14:c.1405-1G>T;ENSCAFT00000090223.1:exon14:c.1405-1G>T;ENSCAFT00000093023.1:exon14:c.1405-1G>T			PRJNA552905	Mammary Tumor
SRR9911348-SRR9911349	chr4	73377987	73377987	C	A	BRIX1	Splice_Site					SNP	splicing	BRIX1	ENSCAFT00000029840.4:exon5:c.528+1G>T			PRJNA552905	Mammary Tumor
SRR9911350-SRR9911351	chr1	62428165	62428165	T	TA	TRDN	Splice_Site						splicing	TRDN	ENSCAFT00000001568.4:exon39:c.1943-2A>TA;ENSCAFT00000001569.5:exon31:c.1892-2A>TA;ENSCAFT00000001573.4:exon35:c.1841-2A>TA			PRJNA552905	Mammary Tumor
SRR9911350-SRR9911351	chr10	3490835	3490835	G	A	SLC16A7	Splice_Site					SNP	splicing	SLC16A7	ENSCAFT00000000487.4:exon5:c.359-1G>A;ENSCAFT00000060119.1:exon5:c.359-1G>A			PRJNA552905	Mammary Tumor
SRR9911350-SRR9911351	chr35	16519756	16519756	C	A	NUP153	Splice_Site					SNP	splicing	NUP153	ENSCAFT00000016120.5:exon21:c.4352+1G>T;ENSCAFT00000044410.3:exon20:c.4226+1G>T;ENSCAFT00000048809.3:exon21:c.3944+1G>T			PRJNA552905	Mammary Tumor
SRR9911356-SRR9911359	chr21	40734634	40734634	C	A	HPS5	Splice_Site					SNP	splicing	HPS5	ENSCAFT00000014567.4:exon18:c.2729+1G>T;ENSCAFT00000084405.1:exon17:c.2657+1G>T;ENSCAFT00000077566.1:exon19:c.2594+1G>T			PRJNA552905	Mammary Tumor
SRR9911363-SRR9911364	chr34	11799596	11799596	C	A	EXOC3	Splice_Site					SNP	splicing	EXOC3	ENSCAFT00000017374.4:exon5:c.1165-1G>T			PRJNA552905	Mammary Tumor
SRR9911375-SRR9911374	chr5	32209767	32209767	C	A	GABARAP	Splice_Site					SNP	splicing	GABARAP	ENSCAFT00000025551.4:exon1:c.90+1G>T			PRJNA552905	Mammary Tumor

## Sheet: Hemangiosarcoma
Tumor_Sample_Barcode	Chromosome	Start_Position	End_Position	Reference_Allele	Tumor_Seq_Allele2	Hugo_Symbol	Variant_Classification	tx	exon	txChange	aaChange	Variant_Type	Func.refGene	Gene.refGene	GeneDetail.refGene	ExonicFunc.refGene	AAChange.refGene	Project	TumorType
SRR10260854-SRR10260853	chr20	42075108	42075108	G	T	ALS2CL	Splice_Site					SNP	splicing	ALS2CL	ENSCAFT00000021741.4:exon10:c.780+1G>T			PRJNA552034	Hemangiosarcoma
SRR10260854-SRR10260853	chr20	45704373	45704373	G	T	CPAMD8	Splice_Site					SNP	splicing	CPAMD8	ENSCAFT00000081876.1:exon23:c.2764-1G>T;ENSCAFT00000075543.1:exon23:c.2725-1G>T;ENSCAFT00000024724.4:exon23:c.2785-1G>T;ENSCAFT00000086746.1:exon23:c.2785-1G>T;ENSCAFT00000082827.1:exon22:c.2614-1G>T;ENSCAFT00000091816.1:exon23:c.2785-1G>T			PRJNA552034	Hemangiosarcoma
SRR10260854-SRR10260853	chr6	33493957	33493957	A	G	METTL22	Splice_Site					SNP	splicing	METTL22	ENSCAFT00000030243.4:exon10:c.1125+2T>C			PRJNA552034	Hemangiosarcoma
SRR10260857-SRR10260856	chr34	30327372	30327372	C	A	SI	Splice_Site					SNP	splicing	SI	ENSCAFT00000022936.4:exon27:c.2830-1G>T			PRJNA552034	Hemangiosarcoma
SRR10260859-SRR10260858	chr10	22478191	22478191	G	T	TTLL1	Splice_Site					SNP	splicing	TTLL1	ENSCAFT00000001433.4:exon8:c.748-1G>T;ENSCAFT00000085584.1:exon8:c.748-1G>T;ENSCAFT00000084100.1:exon8:c.748-1G>T			PRJNA552034	Hemangiosarcoma
SRR10260859-SRR10260858	chr10	25399114	25399115	TG	T	CACNA1I	Splice_Site						splicing	CACNA1I	ENSCAFT00000046802.3:exon22:r.spl;ENSCAFT00000002048.6:exon21:r.spl;ENSCAFT00000059550.1:exon22:r.spl			PRJNA552034	Hemangiosarcoma
SRR10260859-SRR10260858	chr33	13067657	13067657	G	T	BBX	Splice_Site					SNP	splicing	BBX	ENSCAFT00000074558.1:exon12:c.2051+1G>T;ENSCAFT00000015685.4:exon12:c.2051+1G>T;ENSCAFT00000067808.1:exon10:c.1895+1G>T			PRJNA552034	Hemangiosarcoma
SRR10260859-SRR10260858	chr7	23560390	23560390	G	T	COP1	Splice_Site					SNP	splicing	COP1	ENSCAFT00000088082.1:exon20:c.2553+1G>T;ENSCAFT00000067973.1:exon19:c.2490+1G>T;ENSCAFT00000086758.1:exon19:c.2433+1G>T;ENSCAFT00000022674.4:exon21:c.2316+1G>T			PRJNA552034	Hemangiosarcoma
SRR10260863-SRR10260862	chr1	111917314	111917314	A	G	CEACAM28	Splice_Site					SNP	splicing	CEACAM28	ENSCAFT00000022623.5:exon8:c.1415-2A>G			PRJNA552034	Hemangiosarcoma
SRR10260865-SRR10260864	chr12	34522408	34522408	G	T	RIMS1	Splice_Site					SNP	splicing	RIMS1	ENSCAFT00000090752.1:exon15:c.1233-1G>T;ENSCAFT00000080824.1:exon15:c.1233-1G>T;ENSCAFT00000004163.5:exon15:UTR5;ENSCAFT00000060349.1:exon14:c.1431-1G>T;ENSCAFT00000062854.1:exon14:c.1431-1G>T			PRJNA552034	Hemangiosarcoma
SRR10260865-SRR10260864	chr23	52096096	52096096	G	T	OPA1	Splice_Site					SNP	splicing	OPA1	ENSCAFT00000014557.4:exon9:c.844-1G>T;ENSCAFT00000070110.1:exon8:c.790-1G>T;ENSCAFT00000073695.1:exon8:c.736-1G>T;ENSCAFT00000085271.1:exon8:c.733-1G>T;ENSCAFT00000043449.2:exon7:c.682-1G>T			PRJNA552034	Hemangiosarcoma
SRR10260866-SRR10260855	chr1	75578707	75578707	G	A	KIF27	Splice_Site					SNP	splicing	KIF27	ENSCAFT00000069231.1:exon5:UTR5;ENSCAFT00000002195.4:exon4:c.1459-1G>A;ENSCAFT00000064203.1:exon4:c.1459-1G>A;ENSCAFT00000091358.1:exon4:c.1459-1G>A;ENSCAFT00000071047.1:exon3:c.1258-1G>A;ENSCAFT00000078850.1:exon4:c.1459-1G>A;ENSCAFT00000077686.1:exon4:c.1459-1G>A			PRJNA552034	Hemangiosarcoma
SRR10260866-SRR10260855	chr12	23839425	23839425	C	T	DST	Splice_Site					SNP	splicing	DST	ENSCAFT00000065491.1:exon46:c.11001+1G>A;ENSCAFT00000080810.1:exon46:c.11001+1G>A;ENSCAFT00000043203.3:exon46:c.11832+1G>A;ENSCAFT00000062154.1:exon45:c.11796+1G>A;ENSCAFT00000084556.1:exon44:c.10635+1G>A;ENSCAFT00000065669.1:exon46:c.11832+1G>A;ENSCAFT00000060416.1:exon43:c.11382+1G>A;ENSCAFT00000093931.1:exon43:c.11298+1G>A;ENSCAFT00000003820.5:exon42:c.11241+1G>A;ENSCAFT00000085899.1:exon43:c.…			PRJNA552034	Hemangiosarcoma
SRR10260866-SRR10260855	chr3	64828436	64828436	C	T	CC2D2A	Splice_Site					SNP	splicing	CC2D2A	ENSCAFT00000060415.1:exon8:c.567+1G>A;ENSCAFT00000024358.4:exon8:c.567+1G>A;ENSCAFT00000081786.1:exon6:c.792+1G>A;ENSCAFT00000087531.1:exon5:c.690+1G>A;ENSCAFT00000089226.1:exon6:c.792+1G>A;ENSCAFT00000060908.1:exon6:c.792+1G>A			PRJNA552034	Hemangiosarcoma
SRR10260874-SRR10260873	chr11	22391697	22391697	A	G	PPP2CA	Splice_Site					SNP	splicing	PPP2CA	ENSCAFT00000036258.3:exon3:c.486+2T>C;ENSCAFT00000059897.1:exon3:c.486+2T>C			PRJNA552034	Hemangiosarcoma
SRR10260874-SRR10260873	chr11	60722241	60722241	G	T	NIPSNAP3A	Splice_Site					SNP	splicing	NIPSNAP3A	ENSCAFT00000004245.4:exon4:c.580+1G>T;ENSCAFT00000090174.1:exon4:c.580+1G>T;ENSCAFT00000063420.1:exon4:c.580+1G>T			PRJNA552034	Hemangiosarcoma
SRR10260874-SRR10260873	chr11	66206432	66206432	C	A	PTGR1	Splice_Site					SNP	splicing	PTGR1	ENSCAFT00000004823.4:exon3:c.153-1G>T;ENSCAFT00000079878.1:exon2:c.237-1G>T			PRJNA552034	Hemangiosarcoma
SRR10260874-SRR10260873	chr12	10815589	10815589	C	A	GUCA1B	Splice_Site					SNP	splicing	GUCA1B	ENSCAFT00000002576.4:exon7:c.985+1G>T			PRJNA552034	Hemangiosarcoma
SRR10260874-SRR10260873	chr17	49277564	49277564	G	T	DUSP11	Splice_Site					SNP	splicing	DUSP11	ENSCAFT00000088624.1:exon6:c.546+1G>T;ENSCAFT00000013988.4:exon4:c.441+1G>T			PRJNA552034	Hemangiosarcoma
SRR10260874-SRR10260873	chr20	90600	90600	T	C	ALDH1L1	Splice_Site					SNP	splicing	ALDH1L1	ENSCAFT00000088371.1:exon12:c.1185+2T>C;ENSCAFT00000087432.1:exon11:c.1176+2T>C;ENSCAFT00000069924.1:exon11:c.1176+2T>C;ENSCAFT00000006109.4:exon10:UTR5;ENSCAFT00000080281.1:exon8:c.1038+2T>C;ENSCAFT00000070033.1:exon10:c.1137+2T>C			PRJNA552034	Hemangiosarcoma
SRR10260874-SRR10260873	chr28	9491835	9491835	T	C	CCNJ	Splice_Site					SNP	splicing	CCNJ	ENSCAFT00000013415.3:exon1:c.69+2T>C			PRJNA552034	Hemangiosarcoma
SRR10260874-SRR10260873	chr5	75195528	75195528	T	A	ADAT1	Splice_Site					SNP	splicing	ADAT1	ENSCAFT00000081975.1:exon6:c.454+2T>A;ENSCAFT00000086678.1:exon6:c.454+2T>A;ENSCAFT00000070089.1:exon6:c.454+2T>A;ENSCAFT00000067735.1:exon6:c.454+2T>A;ENSCAFT00000031943.4:exon6:c.454+2T>A;ENSCAFT00000065516.1:exon6:c.454+2T>A			PRJNA552034	Hemangiosarcoma
SRR10260874-SRR10260873	chr7	39341769	39341769	C	T	DNAH14	Splice_Site					SNP	splicing	DNAH14	ENSCAFT00000025850.4:exon74:c.11640-1G>A			PRJNA552034	Hemangiosarcoma
SRR10260876-SRR10260875	chr20	8545634	8545634	T	C	MTMR14	Splice_Site					SNP	splicing	MTMR14	ENSCAFT00000049512.3:exon13:c.1125-2A>G;ENSCAFT00000008800.5:exon13:c.1125-2A>G;ENSCAFT00000044738.2:exon13:c.1125-2A>G;ENSCAFT00000076576.1:exon5:c.387-2A>G			PRJNA552034	Hemangiosarcoma
SRR10260876-SRR10260875	chr20	56926617	56926617	G	A	AP3D1	Splice_Site					SNP	splicing	AP3D1	ENSCAFT00000030886.5:exon26:c.2941-1G>A;ENSCAFT00000073086.1:exon25:c.2833-1G>A;ENSCAFT00000061492.1:exon24:c.2752-1G>A			PRJNA552034	Hemangiosarcoma
SRR10260879-SRR10260878	chr2	48044464	48044464	G	T	ZSWIM6	Splice_Site					SNP	splicing	ZSWIM6	ENSCAFT00000011484.4:exon6:UTR5;ENSCAFT00000089800.1:exon5:c.878-1G>T			PRJNA552034	Hemangiosarcoma
SRR10260879-SRR10260878	chr26	17046843	17046843	C	T	PIWIL3	Splice_Site					SNP	splicing	PIWIL3	ENSCAFT00000016829.4:exon9:c.1259+1G>A;ENSCAFT00000076767.1:exon9:c.1232+1G>A			PRJNA552034	Hemangiosarcoma
SRR10260885-SRR10260884	chr12	48938583	48938583	C	A	MDN1	Splice_Site					SNP	splicing	MDN1	ENSCAFT00000004993.5:exon36:c.5141-1G>T;ENSCAFT00000048198.3:exon36:c.5141-1G>T;ENSCAFT00000072786.1:exon36:c.5141-1G>T;ENSCAFT00000077930.1:exon36:c.5141-1G>T;ENSCAFT00000091782.1:exon35:c.4943-1G>T			PRJNA552034	Hemangiosarcoma
SRR10260885-SRR10260884	chr37	14603083	14603083	C	T	INO80D	Splice_Site					SNP	splicing	INO80D	ENSCAFT00000021130.4:exon7:c.1414+1G>A			PRJNA552034	Hemangiosarcoma
SRR10260887-SRR10260886	chr12	17353845	17353845	T	A	CENPQ	Splice_Site					SNP	splicing	CENPQ	ENSCAFT00000003354.4:exon8:c.675+2T>A			PRJNA552034	Hemangiosarcoma
SRR10260887-SRR10260886	chr26	24119951	24119951	G	T	INPP5J	Splice_Site					SNP	splicing	INPP5J	ENSCAFT00000020584.4:exon2:c.112-1G>T;ENSCAFT00000083770.1:exon2:UTR5			PRJNA552034	Hemangiosarcoma
SRR10260887-SRR10260886	chr9	21289763	21289763	A	G	KRT35	Splice_Site					SNP	splicing	KRT35	ENSCAFT00000025278.5:exon4:c.712-2A>G			PRJNA552034	Hemangiosarcoma
SRR10260890-SRR10260889	chr19	38010281	38010281	C	T	ZRANB3	Splice_Site					SNP	splicing	ZRANB3	ENSCAFT00000074821.1:exon17:c.2466-1G>A;ENSCAFT00000067637.1:exon18:c.2466-1G>A;ENSCAFT00000008142.4:exon18:c.2475-1G>A			PRJNA552034	Hemangiosarcoma
SRR10260894-SRR10260893	chr5	32562953	32562953	C	T	TP53	Splice_Site					SNP	splicing	TP53	ENSCAFT00000026465.4:exon8:c.883+1G>A;ENSCAFT00000081814.1:exon8:c.1075+1G>A;ENSCAFT00000086831.1:exon6:c.814+1G>A			PRJNA552034	Hemangiosarcoma
SRR10260894-SRR10260893	chr7	58112649	58112649	A	T	DSG1	Splice_Site					SNP	splicing	DSG1	ENSCAFT00000028693.4:exon26:c.2578+2T>A;ENSCAFT00000035921.3:exon21:c.1672+2T>A			PRJNA552034	Hemangiosarcoma
SRR10260896-SRR10260895	chr37	12233499	12233499	T	G	ABI2	Splice_Site					SNP	splicing	ABI2	ENSCAFT00000088812.1:exon3:c.462+2T>G;ENSCAFT00000084575.1:exon3:c.462+2T>G;ENSCAFT00000082825.1:exon3:c.462+2T>G;ENSCAFT00000078700.1:exon3:c.462+2T>G;ENSCAFT00000020385.5:exon3:c.462+2T>G;ENSCAFT00000047789.2:exon3:c.462+2T>G			PRJNA552034	Hemangiosarcoma
SRR10260896-SRR10260895	chr38	8492994	8492994	G	T	BRINP3	Splice_Site					SNP	splicing	BRINP3	ENSCAFT00000016924.3:exon6:c.1184+1G>T			PRJNA552034	Hemangiosarcoma
SRR10260903-SRR10260902	chr18	17671141	17671141	G	T	PTPN12	Splice_Site					SNP	splicing	PTPN12	ENSCAFT00000063391.1:exon11:c.876+1G>T;ENSCAFT00000072679.1:exon11:c.876+1G>T;ENSCAFT00000067461.1:exon10:c.798+1G>T;ENSCAFT00000048150.2:exon11:c.876+1G>T;ENSCAFT00000039288.3:exon10:c.762+1G>T			PRJNA552034	Hemangiosarcoma
SRR10260903-SRR10260902	chr37	1897855	1897855	G	T	MYO1B	Splice_Site					SNP	splicing	MYO1B	ENSCAFT00000016040.4:exon21:c.2227-1G>T;ENSCAFT00000044081.3:exon21:c.2227-1G>T;ENSCAFT00000082929.1:exon21:c.2227-1G>T			PRJNA552034	Hemangiosarcoma
SRR10260903-SRR10260902	chr9	55118425	55118425	T	C	CERCAM	Splice_Site					SNP	splicing	CERCAM	ENSCAFT00000093886.1:exon5:c.438-2A>G;ENSCAFT00000031918.4:exon2:c.198-2A>G			PRJNA552034	Hemangiosarcoma
SRR10260907-SRR10260906	chr13	39507333	39507334	TA	T	ATP8A1	Splice_Site						splicing	ATP8A1	ENSCAFT00000002869.4:exon14:r.spl;ENSCAFT00000078163.1:exon14:r.spl;ENSCAFT00000069751.1:exon14:r.spl;ENSCAFT00000067761.1:exon14:r.spl;ENSCAFT00000080866.1:exon14:r.spl;ENSCAFT00000043202.3:exon14:r.spl			PRJNA552034	Hemangiosarcoma
SRR10260909-SRR10260908	chr1	40483457	40483457	C	T	NUP43	Splice_Site					SNP	splicing	NUP43	ENSCAFT00000000620.4:exon7:c.913+1G>A;ENSCAFT00000059733.1:exon5:c.625+1G>A			PRJNA552034	Hemangiosarcoma
SRR10260909-SRR10260908	chr5	10848560	10848560	C	A	GRAMD1B	Splice_Site					SNP	splicing	GRAMD1B	ENSCAFT00000089547.1:exon5:c.705+1G>T;ENSCAFT00000049883.2:exon4:c.135+1G>T;ENSCAFT00000018431.5:exon3:c.342+1G>T;ENSCAFT00000060117.1:exon4:c.276+1G>T;ENSCAFT00000018432.4:exon3:c.327+1G>T			PRJNA552034	Hemangiosarcoma
SRR10260910-SRR10260899	chr10	49139640	49139640	G	T	TTC7A	Splice_Site					SNP	splicing	TTC7A	ENSCAFT00000065256.1:exon2:c.207+1G>T;ENSCAFT00000004150.4:exon1:c.225+1G>T;ENSCAFT00000068649.1:exon1:c.225+1G>T;ENSCAFT00000073556.1:exon1:c.225+1G>T;ENSCAFT00000091844.1:exon1:c.225+1G>T;ENSCAFT00000091054.1:exon1:c.225+1G>T			PRJNA552034	Hemangiosarcoma
SRR10260910-SRR10260899	chr18	53865102	53865102	G	T	STX5	Splice_Site					SNP	splicing	STX5	ENSCAFT00000024637.2:exon4:c.352+1G>T			PRJNA552034	Hemangiosarcoma
SRR10260910-SRR10260899	chr2	54288147	54288147	G	A	CENPH	Splice_Site					SNP	splicing	CENPH	ENSCAFT00000012353.4:exon3:c.248+1G>A;ENSCAFT00000044846.3:exon3:c.248+1G>A			PRJNA552034	Hemangiosarcoma
SRR10260910-SRR10260899	chr22	9042809	9042809	G	T	VWA8	Splice_Site					SNP	splicing	VWA8	ENSCAFT00000081198.1:exon35:c.4203+1G>T;ENSCAFT00000007673.4:exon34:c.4128+1G>T;ENSCAFT00000071416.1:exon33:c.4056+1G>T;ENSCAFT00000080167.1:exon35:c.4035+1G>T;ENSCAFT00000085866.1:exon34:c.3990+1G>T;ENSCAFT00000079933.1:exon31:c.3687+1G>T			PRJNA552034	Hemangiosarcoma
SRR10260910-SRR10260899	chr28	1424897	1424897	C	T	ERCC6	Splice_Site					SNP	splicing	ERCC6	ENSCAFT00000010674.4:exon2:c.438-1G>A;ENSCAFT00000071152.1:exon2:c.438-1G>A;ENSCAFT00000065020.1:exon2:c.438-1G>A;ENSCAFT00000073646.1:exon2:c.438-1G>A;ENSCAFT00000082164.1:exon2:c.438-1G>A;ENSCAFT00000066484.1:exon2:c.438-1G>A;ENSCAFT00000063880.1:exon2:c.438-1G>A;ENSCAFT00000084031.1:exon2:c.438-1G>A			PRJNA552034	Hemangiosarcoma
SRR10260910-SRR10260899	chr29	20994526	20994527	TA	T	TRPA1	Splice_Site						splicing	TRPA1	ENSCAFT00000012682.4:exon3:r.spl;ENSCAFT00000088797.1:exon3:r.spl;ENSCAFT00000084369.1:exon3:r.spl;ENSCAFT00000085336.1:exon3:r.spl			PRJNA552034	Hemangiosarcoma
SRR10260910-SRR10260899	chr33	26155352	26155352	G	A	PDIA5	Splice_Site					SNP	splicing	PDIA5	ENSCAFT00000019138.4:exon3:c.257+1G>A			PRJNA552034	Hemangiosarcoma
SRR10260910-SRR10260899	chr5	32564065	32564065	C	A	TP53	Splice_Site					SNP	splicing	TP53	ENSCAFT00000026465.4:exon5:c.337-1G>T;ENSCAFT00000081814.1:exon5:c.529-1G>T;ENSCAFT00000086831.1:exon3:c.268-1G>T			PRJNA552034	Hemangiosarcoma
SRR10260918-SRR10260917	chr15	6648438	6648438	T	G	KIAA0319L	Splice_Site					SNP	splicing	KIAA0319L	ENSCAFT00000005731.4:exon7:c.1207+2T>G;ENSCAFT00000087561.1:exon6:c.1207+2T>G			PRJNA552034	Hemangiosarcoma
SRR10260918-SRR10260917	chr28	40522385	40522385	T	C	INPP5A	Splice_Site					SNP	splicing	INPP5A	ENSCAFT00000017710.4:exon8:c.605+2T>C;ENSCAFT00000060634.1:exon8:c.647+2T>C;ENSCAFT00000083863.1:exon8:c.641+2T>C;ENSCAFT00000078417.1:exon7:c.617+2T>C;ENSCAFT00000070944.1:exon7:c.701+2T>C			PRJNA552034	Hemangiosarcoma
SRR10260918-SRR10260917	chr4	62164034	62164034	G	T	MOCS2	Splice_Site					SNP	splicing	MOCS2	ENSCAFT00000076764.1:exon8:c.1205-1G>T;ENSCAFT00000076764.1:exon8:UTR3;ENSCAFT00000036083.3:exon7:c.502-1G>T;ENSCAFT00000029248.5:exon7:c.511-1G>T			PRJNA552034	Hemangiosarcoma
SRR10260918-SRR10260917	chr7	74539792	74539792	G	T	PTPRM	Splice_Site					SNP	splicing	PTPRM	ENSCAFT00000065530.1:exon21:c.2829+1G>T;ENSCAFT00000068771.1:exon24:c.2943+1G>T;ENSCAFT00000029630.5:exon23:c.2931+1G>T;ENSCAFT00000089612.1:exon23:c.2916+1G>T;ENSCAFT00000060253.1:exon22:c.2904+1G>T;ENSCAFT00000075519.1:exon24:c.3099+1G>T;ENSCAFT00000092214.1:exon24:c.3231+1G>T;ENSCAFT00000029618.4:exon22:c.3063+1G>T			PRJNA552034	Hemangiosarcoma
SRR10260920-SRR10260919	chr1	75893119	75893119	G	T	FRMD3	Splice_Site					SNP	splicing	FRMD3	ENSCAFT00000002259.4:exon1:c.111+1G>T;ENSCAFT00000085021.1:exon1:c.111+1G>T			PRJNA552034	Hemangiosarcoma
SRR10260920-SRR10260919	chr20	9228915	9228915	G	A	RAD18	Splice_Site					SNP	splicing	RAD18	ENSCAFT00000008937.4:exon10:c.1028-1G>A;ENSCAFT00000067733.1:exon8:c.890-1G>A;ENSCAFT00000068860.1:exon10:c.1028-1G>A;ENSCAFT00000079508.1:exon10:c.923-1G>A			PRJNA552034	Hemangiosarcoma
SRR10260923-SRR10260922	chr3	60218520	60218520	G	T	TRMT44	Splice_Site					SNP	splicing	TRMT44	ENSCAFT00000023126.4:exon4:c.934-1G>T			PRJNA552034	Hemangiosarcoma
SRR10260929-SRR10260928	chr14	58991933	58991933	C	A	TSPAN12	Splice_Site					SNP	splicing	TSPAN12	ENSCAFT00000005587.3:exon2:c.67-1G>T;ENSCAFT00000076100.1:exon2:c.67-1G>T			PRJNA552034	Hemangiosarcoma
SRR10260931-SRR10260930	chr10	1827977	1827978	TG	T	CYP27B1	Splice_Site						splicing	CYP27B1	ENSCAFT00000000446.5:exon5:r.spl			PRJNA552034	Hemangiosarcoma
SRR10260931-SRR10260930	chr35	23607974	23607974	G	T	SCGN	Splice_Site					SNP	splicing	SCGN	ENSCAFT00000016776.4:exon3:c.154-1G>T			PRJNA552034	Hemangiosarcoma
SRR10260934-SRR10260933	chr8	72703823	72703823	G	T	PACS2	Splice_Site					SNP	splicing	PACS2	ENSCAFT00000082495.1:exon8:c.541-1G>T;ENSCAFT00000084408.1:exon7:c.658-1G>T;ENSCAFT00000061655.1:exon6:c.643-1G>T;ENSCAFT00000029251.4:exon5:c.451-1G>T			PRJNA552034	Hemangiosarcoma
SRR10260938-SRR10260937	chr14	20526675	20526675	T	C	PPP1R9A	Splice_Site					SNP	splicing	PPP1R9A	ENSCAFT00000063404.1:exon15:c.3184+2T>C;ENSCAFT00000060000.1:exon15:c.3184+2T>C;ENSCAFT00000074467.1:exon14:c.3121+2T>C;ENSCAFT00000003335.4:exon13:c.3055+2T>C;ENSCAFT00000091310.1:exon16:c.3226+2T>C;ENSCAFT00000061493.1:exon13:c.3055+2T>C;ENSCAFT00000071877.1:exon16:c.3184+2T>C			PRJNA552034	Hemangiosarcoma
SRR10260938-SRR10260937	chr15	52239657	52239657	T	TA	FGA	Splice_Site						splicing	FGA	ENSCAFT00000043702.3:exon6:c.1970-2A>TA;ENSCAFT00000013402.3:exon7:c.1907-2A>TA			PRJNA552034	Hemangiosarcoma
SRR10260938-SRR10260937	chr18	25367322	25367322	G	A	RIC8A	Splice_Site					SNP	splicing	RIC8A	ENSCAFT00000010401.4:exon9:c.1614-1G>A			PRJNA552034	Hemangiosarcoma
SRR10260938-SRR10260937	chr36	16930336	16930336	A	G	PDK1	Splice_Site					SNP	splicing	PDK1	ENSCAFT00000020752.4:exon8:c.760-2A>G			PRJNA552034	Hemangiosarcoma
SRR10260940-SRR10260939	chr20	55719991	55719991	G	A	APBA3	Splice_Site					SNP	splicing	APBA3	ENSCAFT00000045025.3:exon8:c.1524+1G>A			PRJNA552034	Hemangiosarcoma
SRR10260942-SRR10260941	chr24	33275138	33275138	G	C	MMP9	Splice_Site					SNP	splicing	MMP9	ENSCAFT00000039331.4:exon2:c.371+1G>C;ENSCAFT00000015753.3:exon2:c.371+1G>C			PRJNA552034	Hemangiosarcoma
SRR10260944-SRR10260943	chr9	47913464	47913464	C	T	CACNA1B	Splice_Site					SNP	splicing	CACNA1B	ENSCAFT00000067250.1:exon19:c.2267+1G>A;ENSCAFT00000030804.4:exon19:c.2267+1G>A			PRJNA552034	Hemangiosarcoma
SRR13050747-SRR13050744	chr21	24048871	24048871	C	G	PPME1	Splice_Site					SNP	splicing	PPME1	ENSCAFT00000008923.5:exon10:c.1006+1G>C			PRJNA677995	Hemangiosarcoma
SRR13050747-SRR13050744	chr26	16104072	16104072	T	A	GCN1	Splice_Site					SNP	splicing	GCN1	ENSCAFT00000016223.4:exon43:c.5496-2A>T;ENSCAFT00000045195.3:exon43:c.5496-2A>T			PRJNA677995	Hemangiosarcoma
SRR13050747-SRR13050744	chr6	42487967	42487967	G	A	SORT1	Splice_Site					SNP	splicing	SORT1	ENSCAFT00000031550.4:exon6:c.939+1G>A;ENSCAFT00000085795.1:exon6:c.939+1G>A;ENSCAFT00000089420.1:exon5:c.873+1G>A;ENSCAFT00000069491.1:exon6:c.939+1G>A			PRJNA677995	Hemangiosarcoma
SRR6277177-SRR6277178	chr5	32563683	32563683	C	A	TP53	Splice_Site					SNP	splicing	TP53	ENSCAFT00000026465.4:exon6:c.636+1G>T;ENSCAFT00000081814.1:exon6:c.828+1G>T;ENSCAFT00000086831.1:exon4:c.567+1G>T			PRJNA417727	Hemangiosarcoma
SRR6277185-SRR6277186	chr20	12459823	12459823	C	T	EDEM1	Splice_Site					SNP	splicing	EDEM1	ENSCAFT00000009032.4:exon5:c.457+1G>A			PRJNA417727	Hemangiosarcoma
SRR6277185-SRR6277186	chr29	11940979	11940979	T	TA	ASPH	Splice_Site						splicing	ASPH	ENSCAFT00000080932.1:exon14:c.1115-2A>TA;ENSCAFT00000083452.1:exon13:c.1070-2A>TA;ENSCAFT00000071569.1:exon14:c.995-2A>TA;ENSCAFT00000068373.1:exon13:c.962-2A>TA;ENSCAFT00000039843.4:exon13:c.950-2A>TA;ENSCAFT00000072957.1:exon13:c.1070-2A>TA;ENSCAFT00000067567.1:exon11:c.914-2A>TA;ENSCAFT00000049007.2:exon14:c.962-2A>TA			PRJNA417727	Hemangiosarcoma
SRR6277191-SRR6277189	chr9	55167892	55167893	TG	T	SLC27A4	Splice_Site						splicing	SLC27A4	ENSCAFT00000084595.1:exon4:r.spl;ENSCAFT00000049296.3:exon9:r.spl;ENSCAFT00000031925.4:exon10:r.spl			PRJNA417727	Hemangiosarcoma
SRR6277193-SRR6277194	chr17	39199172	39199172	G	A	ST3GAL5	Splice_Site					SNP	splicing	ST3GAL5	ENSCAFT00000068181.1:exon6:c.859-1G>A;ENSCAFT00000012243.4:exon6:c.808-1G>A			PRJNA417727	Hemangiosarcoma
SRR6277196-SRR6277195	chr7	43119347	43119347	G	A	NUP210L	Splice_Site					SNP	splicing	NUP210L	ENSCAFT00000027524.4:exon23:c.3104+1G>A;ENSCAFT00000074868.1:exon23:c.3104+1G>A;ENSCAFT00000061375.1:exon8:UTR5			PRJNA417727	Hemangiosarcoma
SRR6277204-SRR6277203	chr6	8709393	8709393	T	A	AP1S1	Splice_Site					SNP	splicing	AP1S1	ENSCAFT00000024250.5:exon2:c.4-2A>T			PRJNA417727	Hemangiosarcoma
SRR6277214-SRR6277213	chr37	15113012	15113012	G	A	ADAM23	Splice_Site					SNP	splicing	ADAM23	ENSCAFT00000021281.4:exon11:c.1157+1G>A;ENSCAFT00000086020.1:exon11:c.1157+1G>A;ENSCAFT00000059866.1:exon11:c.1157+1G>A			PRJNA417727	Hemangiosarcoma
SRR6277216-SRR6277215	chr5	32563877	32563877	C	G	TP53	Splice_Site					SNP	splicing	TP53	ENSCAFT00000026465.4:exon5:c.523+1G>C;ENSCAFT00000081814.1:exon5:c.715+1G>C;ENSCAFT00000086831.1:exon3:c.454+1G>C			PRJNA417727	Hemangiosarcoma
SRR6277216-SRR6277215	chr8	45913813	45913814	TA	T	RGS6	Splice_Site						splicing	RGS6	ENSCAFT00000043529.3:exon12:r.spl;ENSCAFT00000086841.1:exon12:r.spl;ENSCAFT00000078131.1:exon12:r.spl;ENSCAFT00000062802.1:exon12:r.spl;ENSCAFT00000079515.1:exon11:r.spl;ENSCAFT00000026557.4:exon11:r.spl;ENSCAFT00000088896.1:exon11:r.spl			PRJNA417727	Hemangiosarcoma

## Sheet: Mast Cell Tumor
Tumor_Sample_Barcode	Chromosome	Start_Position	End_Position	Reference_Allele	Tumor_Seq_Allele2	Hugo_Symbol	Variant_Classification	tx	exon	txChange	aaChange	Variant_Type	Func.refGene	Gene.refGene	GeneDetail.refGene	ExonicFunc.refGene	AAChange.refGene	Project	TumorType
SRR8510333-SRR8510331	chr1	49034662	49034662	C	A	TCP1	Splice_Site					SNP	splicing	TCP1	ENSCAFT00000001141.4:exon5:c.378-1G>T;ENSCAFT00000063465.1:exon5:c.378-1G>T			PRJNA518003	Mast Cell Tumor
SRR8510333-SRR8510331	chr10	7833198	7833198	G	T	LEMD3	Splice_Site					SNP	splicing	LEMD3	ENSCAFT00000048719.3:exon5:c.999-1G>T			PRJNA518003	Mast Cell Tumor
SRR8510333-SRR8510331	chr13	12453088	12453088	C	A	CSMD3	Splice_Site					SNP	splicing	CSMD3	ENSCAFT00000001238.5:exon58:c.9149-1G>T;ENSCAFT00000001231.4:exon56:c.8642-1G>T			PRJNA518003	Mast Cell Tumor
SRR8510333-SRR8510331	chr17	21203772	21203772	G	T	CAD	Splice_Site					SNP	splicing	CAD	ENSCAFT00000049604.2:exon9:c.995+1G>T;ENSCAFT00000007712.5:exon9:c.995+1G>T;ENSCAFT00000089405.1:exon9:c.995+1G>T			PRJNA518003	Mast Cell Tumor
SRR8510333-SRR8510331	chr2	73093462	73093462	G	T	SLC9A1	Splice_Site					SNP	splicing	SLC9A1	ENSCAFT00000019381.4:exon3:c.817-1G>T			PRJNA518003	Mast Cell Tumor
SRR8510333-SRR8510331	chr20	39947525	39947525	G	T	USP4	Splice_Site					SNP	splicing	USP4	ENSCAFT00000018443.4:exon19:c.2540+1G>T;ENSCAFT00000091021.1:exon18:c.2399+1G>T			PRJNA518003	Mast Cell Tumor
SRR8510333-SRR8510331	chr24	29164428	29164428	G	T	TOP1	Splice_Site					SNP	splicing	TOP1	ENSCAFT00000014397.4:exon19:c.2060+1G>T			PRJNA518003	Mast Cell Tumor
SRR8510333-SRR8510331	chr26	24637611	24637611	G	T	DEPDC5	Splice_Site					SNP	splicing	DEPDC5	ENSCAFT00000081956.1:exon6:c.364-1G>T;ENSCAFT00000088058.1:exon6:c.364-1G>T;ENSCAFT00000021092.5:exon5:c.280-1G>T;ENSCAFT00000043258.2:exon6:c.364-1G>T;ENSCAFT00000087465.1:exon5:c.253-1G>T			PRJNA518003	Mast Cell Tumor
SRR8510333-SRR8510331	chr3	32546327	32546327	A	G	OCA2	Splice_Site					SNP	splicing	OCA2	ENSCAFT00000015763.4:exon19:c.1897-2A>G;ENSCAFT00000083330.1:exon17:c.1780-2A>G			PRJNA518003	Mast Cell Tumor
SRR8510333-SRR8510331	chr5	28703283	28703283	C	A	DYNC2H1	Splice_Site					SNP	splicing	DYNC2H1	ENSCAFT00000078636.1:exon15:c.2107-1G>T;ENSCAFT00000043082.2:exon15:c.2107-1G>T;ENSCAFT00000023808.5:exon15:c.2107-1G>T			PRJNA518003	Mast Cell Tumor
SRR8510333-SRR8510331	chr5	32856240	32856240	G	T	GUCY2D	Splice_Site					SNP	splicing	GUCY2D	ENSCAFT00000026758.3:exon15:c.2782-1G>T			PRJNA518003	Mast Cell Tumor
SRR8510333-SRR8510331	chr7	11297682	11297682	G	T	RPS6KC1	Splice_Site					SNP	splicing	RPS6KC1	ENSCAFT00000093131.1:exon11:c.1226-1G>T;ENSCAFT00000062063.1:exon11:c.1226-1G>T;ENSCAFT00000092931.1:exon10:c.1133-1G>T;ENSCAFT00000072584.1:exon10:c.863-1G>T;ENSCAFT00000082188.1:exon11:c.1226-1G>T;ENSCAFT00000019734.4:exon10:c.1190-1G>T			PRJNA518003	Mast Cell Tumor
SRR8510333-SRR8510331	chr7	40548112	40548112	G	T	FCRL1	Splice_Site					SNP	splicing	FCRL1	ENSCAFT00000047821.2:exon11:c.1219-1G>T;ENSCAFT00000026072.5:exon12:c.1270-1G>T			PRJNA518003	Mast Cell Tumor
SRR8510333-SRR8510331	chr8	46827666	46827666	C	A	HEATR4	Splice_Site					SNP	splicing	HEATR4	ENSCAFT00000050074.2:exon8:c.1736-1G>T;ENSCAFT00000026657.5:exon8:c.1736-1G>T			PRJNA518003	Mast Cell Tumor
SRR8510335-SRR8510336	chr10	1708616	1708616	C	A	B4GALNT1	Splice_Site					SNP	splicing	B4GALNT1	ENSCAFT00000000401.3:exon3:c.219-1G>T;ENSCAFT00000069308.1:exon2:c.717-1G>T;ENSCAFT00000087910.1:exon2:c.99-1G>T;ENSCAFT00000084809.1:exon3:c.219-1G>T			PRJNA518003	Mast Cell Tumor
SRR8510335-SRR8510336	chr11	52329648	52329648	G	T	NPR2	Splice_Site					SNP	splicing	NPR2	ENSCAFT00000077701.1:exon4:c.745-1G>T;ENSCAFT00000003506.7:exon4:c.694-1G>T;ENSCAFT00000080136.1:exon5:c.649-1G>T;ENSCAFT00000081068.1:exon4:c.652-1G>T;ENSCAFT00000088134.1:exon5:c.676-1G>T;ENSCAFT00000027767.4:exon3:c.400-1G>T			PRJNA518003	Mast Cell Tumor
SRR8510335-SRR8510336	chr12	68525246	68525246	G	T	FAM229B	Splice_Site					SNP	splicing	FAM229B	ENSCAFT00000047266.2:exon3:UTR5			PRJNA518003	Mast Cell Tumor
SRR8510335-SRR8510336	chr16	27235208	27235208	C	A	DDHD2	Splice_Site					SNP	splicing	DDHD2	ENSCAFT00000009882.4:exon16:c.2067-1G>T;ENSCAFT00000062704.1:exon17:c.2189-1G>T;ENSCAFT00000062704.1:exon17:UTR3			PRJNA518003	Mast Cell Tumor
SRR8510335-SRR8510336	chr5	39613592	39613592	C	A	PIGL	Splice_Site					SNP	splicing	PIGL	ENSCAFT00000067097.1:exon4:c.448-1G>T;ENSCAFT00000028628.4:exon5:c.430-1G>T;ENSCAFT00000068635.1:exon5:c.430-1G>T			PRJNA518003	Mast Cell Tumor
SRR8510335-SRR8510336	chr9	41350533	41350535	TAG	T	RAB11FIP4	Splice_Site						splicing	RAB11FIP4				PRJNA518003	Mast Cell Tumor
SRR8510337-SRR8510338	chr6	43211208	43211208	C	A	FAM102B	Splice_Site					SNP	splicing	FAM102B	ENSCAFT00000091916.1:exon2:c.138-1G>T;ENSCAFT00000031716.4:exon2:c.138-1G>T;ENSCAFT00000067217.1:exon2:c.138-1G>T			PRJNA518003	Mast Cell Tumor
SRR8510339-SRR8510340	chr3	71833834	71833834	C	A	NSUN7	Splice_Site					SNP	splicing	NSUN7	ENSCAFT00000025188.4:exon11:c.2572-1G>T;ENSCAFT00000088878.1:exon10:c.2428-1G>T;ENSCAFT00000025183.5:exon12:c.1825-1G>T			PRJNA518003	Mast Cell Tumor
SRR8510339-SRR8510340	chr31	39536173	39536173	T	C	MCM3AP	Splice_Site					SNP	splicing	MCM3AP	ENSCAFT00000048123.3:exon16:c.3537-2A>G;ENSCAFT00000019089.5:exon16:c.3537-2A>G			PRJNA518003	Mast Cell Tumor
SRR8510339-SRR8510340	chr8	4118051	4118051	G	T	DCAF11	Splice_Site					SNP	splicing	DCAF11	ENSCAFT00000018899.4:exon2:c.156-1G>T;ENSCAFT00000091314.1:exon2:UTR5;ENSCAFT00000090058.1:exon2:c.156-1G>T			PRJNA518003	Mast Cell Tumor
SRR8510341-SRR8510342	chr11	68677464	68677466	TAG	T	WHRN	Splice_Site						splicing	WHRN				PRJNA518003	Mast Cell Tumor
SRR8510341-SRR8510342	chr17	22866074	22866074	A	G	TOGARAM2	Splice_Site					SNP	splicing	TOGARAM2	ENSCAFT00000008480.4:exon9:c.1490-2A>G			PRJNA518003	Mast Cell Tumor
SRR8510341-SRR8510342	chr18	35374314	35374314	C	T	RCN1	Splice_Site					SNP	splicing	RCN1	ENSCAFT00000039726.3:exon6:c.688-1G>A			PRJNA518003	Mast Cell Tumor
SRR8510341-SRR8510342	chr26	484088	484088	C	T	P2RX2	Splice_Site					SNP	splicing	P2RX2	ENSCAFT00000065591.1:exon7:c.777+1G>A;ENSCAFT00000090977.1:exon6:c.696+1G>A;ENSCAFT00000010151.5:exon7:c.777+1G>A			PRJNA518003	Mast Cell Tumor
SRR8510341-SRR8510342	chr28	7654235	7654235	C	T	MYOF	Splice_Site					SNP	splicing	MYOF	ENSCAFT00000047470.3:exon25:c.2589+1G>A;ENSCAFT00000012483.5:exon24:c.2550+1G>A			PRJNA518003	Mast Cell Tumor
SRR8510344-SRR8510345	chr23	8616932	8616932	T	C	SCN11A	Splice_Site					SNP	splicing	SCN11A	ENSCAFT00000047954.3:exon10:c.1105-2A>G;ENSCAFT00000043213.2:exon10:c.1105-2A>G			PRJNA518003	Mast Cell Tumor
SRR8510344-SRR8510345	chr9	22233907	22233907	G	T	TOP2A	Splice_Site					SNP	splicing	TOP2A	ENSCAFT00000025539.4:exon30:c.3812-1G>T;ENSCAFT00000046104.3:exon30:c.3839-1G>T			PRJNA518003	Mast Cell Tumor
SRR8510346-SRR8510343	chr16	14554086	14554086	G	T	SSPO	Splice_Site					SNP	splicing	SSPO	ENSCAFT00000044018.2:exon13:c.1867+1G>T			PRJNA518003	Mast Cell Tumor
SRR8510346-SRR8510343	chr17	40141895	40141895	C	A	DNAH6	Splice_Site					SNP	splicing	DNAH6	ENSCAFT00000012666.5:exon73:c.11711-1G>T			PRJNA518003	Mast Cell Tumor
SRR8510346-SRR8510343	chr17	58733254	58733254	C	A	LIX1L	Splice_Site					SNP	splicing	LIX1L	ENSCAFT00000018074.5:exon4:c.598-1G>T			PRJNA518003	Mast Cell Tumor
SRR8510346-SRR8510343	chr18	54036354	54036354	G	T	EML3	Splice_Site					SNP	splicing	EML3	ENSCAFT00000025031.3:exon20:c.2258-1G>T			PRJNA518003	Mast Cell Tumor
SRR8510346-SRR8510343	chr20	4309632	4309632	C	A	XPC	Splice_Site					SNP	splicing	XPC	ENSCAFT00000007204.3:exon9:c.1009-1G>T			PRJNA518003	Mast Cell Tumor
SRR8510346-SRR8510343	chr20	50122618	50122618	C	A	LDLR	Splice_Site					SNP	splicing	LDLR	ENSCAFT00000046113.3:exon11:c.1876-1G>T;ENSCAFT00000027791.4:exon13:c.1852-1G>T;ENSCAFT00000086039.1:exon13:c.1852-1G>T;ENSCAFT00000089638.1:exon11:c.1876-1G>T			PRJNA518003	Mast Cell Tumor
SRR8510346-SRR8510343	chr22	49573861	49573861	G	T	TM9SF2	Splice_Site					SNP	splicing	TM9SF2	ENSCAFT00000009375.4:exon16:c.1750-1G>T			PRJNA518003	Mast Cell Tumor
SRR8510346-SRR8510343	chr22	52293365	52293365	C	A	POGLUT2	Splice_Site					SNP	splicing	POGLUT2	ENSCAFT00000038529.3:exon3:c.389-1G>T;ENSCAFT00000084568.1:exon3:c.389-1G>T;ENSCAFT00000009668.5:exon3:c.299-1G>T;ENSCAFT00000083206.1:exon3:c.389-1G>T			PRJNA518003	Mast Cell Tumor
SRR8510346-SRR8510343	chr5	32240120	32240120	G	T	SLC2A4	Splice_Site					SNP	splicing	SLC2A4	ENSCAFT00000025579.4:exon4:c.324-1G>T;ENSCAFT00000074884.1:exon4:c.411-1G>T			PRJNA518003	Mast Cell Tumor
SRR8510346-SRR8510343	chr6	31054159	31054159	G	T	ZC3H7A	Splice_Site					SNP	splicing	ZC3H7A	ENSCAFT00000029968.4:exon11:c.1173+1G>T			PRJNA518003	Mast Cell Tumor
SRR8510346-SRR8510343	chr6	54490149	54490149	C	A	SLC44A3	Splice_Site					SNP	splicing	SLC44A3	ENSCAFT00000042778.3:exon5:c.902-1G>T;ENSCAFT00000032001.4:exon5:c.902-1G>T;ENSCAFT00000068665.1:exon5:c.902-1G>T;ENSCAFT00000090157.1:exon5:c.902-1G>T			PRJNA518003	Mast Cell Tumor
SRR8510346-SRR8510343	chr7	41561181	41561181	C	A	TSACC	Splice_Site					SNP	splicing	TSACC	ENSCAFT00000082216.1:exon3:c.35-1G>T;ENSCAFT00000026621.4:exon3:c.35-1G>T;ENSCAFT00000043711.2:exon3:c.116-1G>T			PRJNA518003	Mast Cell Tumor
SRR8510346-SRR8510343	chr8	4066082	4066082	G	T	CARMIL3	Splice_Site					SNP	splicing	CARMIL3	ENSCAFT00000018562.4:exon19:c.1475-1G>T;ENSCAFT00000059836.1:exon19:c.1475-1G>T;ENSCAFT00000062426.1:exon19:c.1475-1G>T			PRJNA518003	Mast Cell Tumor
SRR8510346-SRR8510343	chr9	18295908	18295908	G	T	MAP3K14	Splice_Site					SNP	splicing	MAP3K14	ENSCAFT00000021854.4:exon9:c.1661-1G>T;ENSCAFT00000075933.1:exon8:c.1529-1G>T;ENSCAFT00000088008.1:exon8:c.1523-1G>T			PRJNA518003	Mast Cell Tumor
SRR8510346-SRR8510343	chr9	18396172	18396172	C	A	ACBD4	Splice_Site					SNP	splicing	ACBD4	ENSCAFT00000070256.1:exon7:c.569-1G>T;ENSCAFT00000022047.4:exon7:c.503-1G>T;ENSCAFT00000076650.1:exon7:c.503-1G>T			PRJNA518003	Mast Cell Tumor
SRR8510346-SRR8510343	chr9	18623060	18623060	G	T	EFTUD2	Splice_Site					SNP	splicing	EFTUD2	ENSCAFT00000022358.4:exon16:c.1414-1G>T;ENSCAFT00000073179.1:exon16:c.1414-1G>T			PRJNA518003	Mast Cell Tumor
SRR8510346-SRR8510343	chr9	48737155	48737155	C	A	PHPT1	Splice_Site					SNP	splicing	PHPT1	ENSCAFT00000031083.4:exon2:c.161-1G>T			PRJNA518003	Mast Cell Tumor
SRR8510347-SRR8510363	chr13	22772165	22772165	T	C	MTSS1	Splice_Site					SNP	splicing	MTSS1	ENSCAFT00000001615.4:exon2:c.73-2A>G;ENSCAFT00000076554.1:exon2:c.73-2A>G;ENSCAFT00000093662.1:exon2:UTR5;ENSCAFT00000072762.1:exon2:c.73-2A>G;ENSCAFT00000001612.4:exon2:c.73-2A>G			PRJNA518003	Mast Cell Tumor
SRR8510347-SRR8510363	chr15	56265730	56265730	G	T	RAPGEF2	Splice_Site					SNP	splicing	RAPGEF2	ENSCAFT00000013877.4:exon1:c.60+1G>T			PRJNA518003	Mast Cell Tumor
SRR8510347-SRR8510363	chr2	42764198	42764198	C	A	PLPP1	Splice_Site					SNP	splicing	PLPP1	ENSCAFT00000074899.1:exon6:c.493-1G>T;ENSCAFT00000074086.1:exon5:c.517-1G>T;ENSCAFT00000072482.1:exon5:c.514-1G>T;ENSCAFT00000085117.1:exon7:c.547-1G>T;ENSCAFT00000011001.4:exon5:c.490-1G>T			PRJNA518003	Mast Cell Tumor
SRR8510347-SRR8510363	chr29	31750300	31750300	G	T	E2F5	Splice_Site					SNP	splicing	E2F5	ENSCAFT00000013681.4:exon4:c.133-1G>T			PRJNA518003	Mast Cell Tumor
SRR8510347-SRR8510363	chr34	3322930	3322930	G	T	CTNND2	Splice_Site					SNP	splicing	CTNND2	ENSCAFT00000043483.3:exon15:c.2452-1G>T;ENSCAFT00000015867.4:exon15:c.2452-1G>T;ENSCAFT00000078777.1:exon13:c.1450-1G>T;ENSCAFT00000082487.1:exon14:c.2287-1G>T			PRJNA518003	Mast Cell Tumor
SRR8510347-SRR8510363	chr36	26144132	26144132	G	T	NUP35	Splice_Site					SNP	splicing	NUP35	ENSCAFT00000046623.2:exon4:c.412-1G>T			PRJNA518003	Mast Cell Tumor
SRR8510347-SRR8510363	chr4	41642223	41642223	G	T	LCP2	Splice_Site					SNP	splicing	LCP2	ENSCAFT00000045064.3:exon12:c.796-1G>T			PRJNA518003	Mast Cell Tumor
SRR8510347-SRR8510363	chr5	81663190	81663190	G	T	RANBP10	Splice_Site					SNP	splicing	RANBP10	ENSCAFT00000032378.4:exon2:c.236-1G>T			PRJNA518003	Mast Cell Tumor
SRR8510347-SRR8510363	chr6	9079816	9079816	C	T	MOSPD3	Splice_Site					SNP	splicing	MOSPD3	ENSCAFT00000022546.3:exon5:c.674-1G>A			PRJNA518003	Mast Cell Tumor
SRR8510348-SRR8510332	chr15	39414982	39414982	G	T	SCYL2	Splice_Site					SNP	splicing	SCYL2	ENSCAFT00000083455.1:exon11:c.2074-1G>T;ENSCAFT00000078153.1:exon11:c.2074-1G>T;ENSCAFT00000082287.1:exon12:c.2086-1G>T;ENSCAFT00000010882.4:exon12:c.1438-1G>T			PRJNA518003	Mast Cell Tumor
SRR8510348-SRR8510332	chr21	31566173	31566173	T	C	TUB	Splice_Site					SNP	splicing	TUB	ENSCAFT00000011073.5:exon1:c.42+2T>C;ENSCAFT00000011073.5:exon2:c.43-1T>C			PRJNA518003	Mast Cell Tumor
SRR8510348-SRR8510332	chr4	28874459	28874459	G	T	ZMIZ1	Splice_Site					SNP	splicing	ZMIZ1	ENSCAFT00000087989.1:exon2:UTR5;ENSCAFT00000065458.1:exon2:UTR5;ENSCAFT00000078124.1:exon2:UTR5;ENSCAFT00000089644.1:exon1:UTR5;ENSCAFT00000067757.1:exon1:UTR5			PRJNA518003	Mast Cell Tumor
SRR8510348-SRR8510332	chr4	32644772	32644772	G	T	CCSER2	Splice_Site					SNP	splicing	CCSER2	ENSCAFT00000025268.5:exon5:c.1862+1G>T;ENSCAFT00000088373.1:exon5:c.1862+1G>T;ENSCAFT00000073878.1:exon5:c.1862+1G>T;ENSCAFT00000079326.1:exon5:c.1862+1G>T			PRJNA518003	Mast Cell Tumor
SRR8510348-SRR8510332	chr4	51748555	51748555	G	A	EBF1	Splice_Site					SNP	splicing	EBF1	ENSCAFT00000027476.4:exon13:c.1192-1G>A;ENSCAFT00000069603.1:exon12:c.1099-1G>A;ENSCAFT00000069083.1:exon13:c.1168-1G>A			PRJNA518003	Mast Cell Tumor
SRR8510348-SRR8510332	chr5	34306347	34306347	G	T	GLP2R	Splice_Site					SNP	splicing	GLP2R	ENSCAFT00000027649.4:exon11:c.1740+1G>T			PRJNA518003	Mast Cell Tumor
SRR8510348-SRR8510332	chr6	9249739	9249739	G	A	ZCWPW1	Splice_Site					SNP	splicing	ZCWPW1	ENSCAFT00000023014.4:exon5:c.444-1G>A;ENSCAFT00000072086.1:exon2:c.114-1G>A			PRJNA518003	Mast Cell Tumor
SRR8510348-SRR8510332	chr7	13584161	13584161	G	T	CEP350	Splice_Site					SNP	splicing	CEP350	ENSCAFT00000020142.5:exon12:c.3221-1G>T;ENSCAFT00000062818.1:exon11:c.3107-1G>T;ENSCAFT00000093305.1:exon11:c.3107-1G>T;ENSCAFT00000020139.4:exon12:c.3224-1G>T;ENSCAFT00000060020.1:exon10:c.2813-1G>T			PRJNA518003	Mast Cell Tumor
SRR8510350-SRR8510349	chr8	1292258	1292258	C	A	TRIP11	Splice_Site					SNP	splicing	TRIP11	ENSCAFT00000075859.1:exon9:c.1100-1G>T;ENSCAFT00000017298.4:exon7:c.827-1G>T;ENSCAFT00000068897.1:exon6:c.758-1G>T;ENSCAFT00000063588.1:exon6:c.731-1G>T			PRJNA518003	Mast Cell Tumor
SRR8510353-SRR8510365	chr10	7833198	7833198	G	T	LEMD3	Splice_Site					SNP	splicing	LEMD3	ENSCAFT00000048719.3:exon5:c.999-1G>T			PRJNA518003	Mast Cell Tumor
SRR8510353-SRR8510365	chr14	43381651	43381651	C	A	CRHR2	Splice_Site					SNP	splicing	CRHR2	ENSCAFT00000091412.1:exon7:c.498-1G>T;ENSCAFT00000004972.4:exon6:c.504-1G>T;ENSCAFT00000081007.1:exon6:c.504-1G>T;ENSCAFT00000089828.1:exon5:c.426-1G>T;ENSCAFT00000068749.1:exon5:c.426-1G>T			PRJNA518003	Mast Cell Tumor
SRR8510353-SRR8510365	chr23	1932874	1932874	G	T	ZNF445	Splice_Site					SNP	splicing	ZNF445	ENSCAFT00000007117.5:exon6:c.914-1G>T;ENSCAFT00000047204.2:exon6:c.914-1G>T;ENSCAFT00000071254.1:exon6:c.914-1G>T;ENSCAFT00000079667.1:exon6:c.914-1G>T;ENSCAFT00000065719.1:exon6:c.914-1G>T			PRJNA518003	Mast Cell Tumor
SRR8510353-SRR8510365	chr3	58215762	58215762	G	T	ADAMTS7	Splice_Site					SNP	splicing	ADAMTS7	ENSCAFT00000089922.1:exon17:c.2504-1G>T;ENSCAFT00000076642.1:exon16:c.2513-1G>T;ENSCAFT00000059538.1:exon17:c.2384-1G>T;ENSCAFT00000080980.1:exon16:c.2369-1G>T;ENSCAFT00000083741.1:exon15:c.2321-1G>T;ENSCAFT00000069927.1:exon17:c.2489-1G>T;ENSCAFT00000067424.1:exon17:c.2408-1G>T;ENSCAFT00000072250.1:exon17:c.2408-1G>T;ENSCAFT00000022463.4:exon17:c.2408-1G>T			PRJNA518003	Mast Cell Tumor
SRR8510353-SRR8510365	chr30	10047935	10047935	G	T	TMEM62	Splice_Site					SNP	splicing	TMEM62	ENSCAFT00000018927.4:exon12:c.1382-1G>T			PRJNA518003	Mast Cell Tumor
SRR8510353-SRR8510365	chr4	64129955	64129955	C	A	PARP8	Splice_Site					SNP	splicing	PARP8	ENSCAFT00000029349.4:exon19:c.1929-1G>T;ENSCAFT00000076913.1:exon19:c.1929-1G>T;ENSCAFT00000059658.1:exon18:c.1851-1G>T;ENSCAFT00000070753.1:exon18:c.1803-1G>T;ENSCAFT00000086630.1:exon19:c.1881-1G>T;ENSCAFT00000090947.1:exon15:c.1680-1G>T;ENSCAFT00000069778.1:exon19:c.1929-1G>T			PRJNA518003	Mast Cell Tumor
SRR8510353-SRR8510365	chr5	42147736	42147736	G	T	COPS3	Splice_Site					SNP	splicing	COPS3	ENSCAFT00000061725.1:exon2:UTR5;ENSCAFT00000029331.4:exon2:c.56-1G>T;ENSCAFT00000063211.1:exon2:c.29-1G>T			PRJNA518003	Mast Cell Tumor
SRR8510357-SRR8510356	chr1	16818633	16818633	G	T	CCBE1	Splice_Site					SNP	splicing	CCBE1	ENSCAFT00000000149.4:exon9:c.961-1G>T;ENSCAFT00000074872.1:exon9:c.784-1G>T			PRJNA518003	Mast Cell Tumor
SRR8510357-SRR8510356	chr1	85982847	85982847	G	T	CEMIP2	Splice_Site					SNP	splicing	CEMIP2	ENSCAFT00000002882.4:exon11:c.1980-1G>T;ENSCAFT00000074434.1:exon11:c.1980-1G>T;ENSCAFT00000090263.1:exon11:c.1980-1G>T;ENSCAFT00000070395.1:exon10:c.1791-1G>T;ENSCAFT00000075370.1:exon11:c.1980-1G>T;ENSCAFT00000082404.1:exon9:c.1659-1G>T			PRJNA518003	Mast Cell Tumor
SRR8510357-SRR8510356	chr10	6937138	6937138	G	T	SRGAP1	Splice_Site					SNP	splicing	SRGAP1	ENSCAFT00000000539.5:exon20:c.2409-1G>T;ENSCAFT00000048655.2:exon20:c.2340-1G>T;ENSCAFT00000085771.1:exon19:c.2331-1G>T			PRJNA518003	Mast Cell Tumor
SRR8510357-SRR8510356	chr12	44210299	44210299	G	T	CYB5R4	Splice_Site					SNP	splicing	CYB5R4	ENSCAFT00000060980.1:exon9:c.580-1G>T;ENSCAFT00000065213.1:exon9:c.460-1G>T;ENSCAFT00000004764.4:exon8:c.562-1G>T;ENSCAFT00000082769.1:exon7:c.532-1G>T			PRJNA518003	Mast Cell Tumor
SRR8510357-SRR8510356	chr15	43805823	43805823	G	T	ABCE1	Splice_Site					SNP	splicing	ABCE1	ENSCAFT00000012170.4:exon12:c.1145-1G>T			PRJNA518003	Mast Cell Tumor
SRR8510357-SRR8510356	chr32	17419571	17419571	G	T	PDLIM5	Splice_Site					SNP	splicing	PDLIM5	ENSCAFT00000062352.1:exon5:c.292-1G>T;ENSCAFT00000016017.4:exon5:c.292-1G>T			PRJNA518003	Mast Cell Tumor
SRR8510357-SRR8510356	chr7	5170241	5170241	G	T	DENND1B	Splice_Site					SNP	splicing	DENND1B	ENSCAFT00000018049.4:exon13:c.859-1G>T;ENSCAFT00000088640.1:exon13:c.853-1G>T;ENSCAFT00000080335.1:exon12:c.793-1G>T			PRJNA518003	Mast Cell Tumor
SRR8510357-SRR8510356	chr8	10563690	10563690	C	A	HEATR5A	Splice_Site					SNP	splicing	HEATR5A	ENSCAFT00000061699.1:exon35:c.5647-1G>T;ENSCAFT00000020840.4:exon34:c.5620-1G>T;ENSCAFT00000063416.1:exon34:c.5575-1G>T;ENSCAFT00000088691.1:exon33:c.5467-1G>T;ENSCAFT00000083450.1:exon34:c.5464-1G>T;ENSCAFT00000070421.1:exon32:c.5269-1G>T			PRJNA518003	Mast Cell Tumor
SRR8510359-SRR8510358	chr25	41852097	41852098	TA	T	DNER	Splice_Site						splicing	DNER	ENSCAFT00000016763.4:exon5:r.spl			PRJNA518003	Mast Cell Tumor
SRR8510359-SRR8510358	chr5	43179786	43179786	G	T	SERBP1	Splice_Site					SNP	splicing	SERBP1	ENSCAFT00000029427.4:exon6:c.816-1G>T			PRJNA518003	Mast Cell Tumor
SRR8510361-SRR8510360	chr1	81351360	81351360	C	A	VPS13A	Splice_Site					SNP	splicing	VPS13A	ENSCAFT00000048812.3:exon21:c.2176-1G>T;ENSCAFT00000002558.4:exon20:c.1183-1G>T;ENSCAFT00000072124.1:exon21:c.1246-1G>T;ENSCAFT00000073929.1:exon21:c.1246-1G>T;ENSCAFT00000092166.1:exon21:c.1246-1G>T;ENSCAFT00000066056.1:exon19:c.1300-1G>T;ENSCAFT00000060864.1:exon12:c.1198-1G>T;ENSCAFT00000092139.1:exon21:c.2176-1G>T;ENSCAFT00000069333.1:exon17:c.1765-1G>T;ENSCAFT00000062163.1:exon21:c.2176-1G>T			PRJNA518003	Mast Cell Tumor
SRR8510367-SRR8510368	chr1	105902662	105902662	G	T	KLK6	Splice_Site					SNP	splicing	KLK6	ENSCAFT00000037805.3:exon4:c.203+1G>T			PRJNA518003	Mast Cell Tumor
SRR8510367-SRR8510368	chr18	46436282	46436282	G	T	TSPAN32	Splice_Site					SNP	splicing	TSPAN32	ENSCAFT00000016066.4:exon7:c.627+1G>T			PRJNA518003	Mast Cell Tumor
SRR8510367-SRR8510368	chr19	53631777	53631777	G	T	FMNL2	Splice_Site					SNP	splicing	FMNL2	ENSCAFT00000064671.1:exon21:c.2479+1G>T;ENSCAFT00000061524.1:exon20:c.2458+1G>T;ENSCAFT00000043228.3:exon21:c.2479+1G>T;ENSCAFT00000009376.6:exon21:c.2479+1G>T			PRJNA518003	Mast Cell Tumor
SRR8510367-SRR8510368	chr20	39046884	39046884	G	T	HYAL3	Splice_Site					SNP	splicing	HYAL3	ENSCAFT00000059522.1:exon3:c.148-1G>T;ENSCAFT00000016969.4:exon2:c.895-1G>T			PRJNA518003	Mast Cell Tumor
SRR8510367-SRR8510368	chr20	43991437	43991437	G	T	BORCS8	Splice_Site					SNP	splicing	BORCS8	ENSCAFT00000022790.4:exon4:c.216-1G>T;ENSCAFT00000071330.1:exon3:c.390-1G>T			PRJNA518003	Mast Cell Tumor
SRR8510367-SRR8510368	chr3	35373075	35373075	G	T	UBE3A	Splice_Site					SNP	splicing	UBE3A	ENSCAFT00000016065.4:exon3:UTR5;ENSCAFT00000077387.1:exon3:UTR5;ENSCAFT00000092507.1:exon2:UTR5			PRJNA518003	Mast Cell Tumor
SRR8510367-SRR8510368	chr31	21193181	21193181	G	T	JAM2	Splice_Site					SNP	splicing	JAM2	ENSCAFT00000038891.4:exon8:c.1037-1G>T;ENSCAFT00000013462.4:exon7:c.698-1G>T			PRJNA518003	Mast Cell Tumor
SRR8510367-SRR8510368	chr35	7503590	7503590	G	T	DSP	Splice_Site					SNP	splicing	DSP	ENSCAFT00000015201.4:exon9:c.1057-1G>T;ENSCAFT00000049667.3:exon9:c.967-1G>T;ENSCAFT00000082355.1:exon5:c.388-1G>T			PRJNA518003	Mast Cell Tumor
SRR8510367-SRR8510368	chr5	62848445	62848445	G	T	TMEM201	Splice_Site					SNP	splicing	TMEM201	ENSCAFT00000046952.2:exon8:c.1336+1G>T;ENSCAFT00000031376.4:exon7:c.1336+1G>T			PRJNA518003	Mast Cell Tumor
SRR8510370-SRR8510371	chr4	54909032	54909032	G	T	GEMIN5	Splice_Site					SNP	splicing	GEMIN5	ENSCAFT00000044955.2:exon11:c.1463-1G>T			PRJNA518003	Mast Cell Tumor
SRR8510374-SRR8510375	chr16	45261883	45261883	G	T	LRP2BP	Splice_Site					SNP	splicing	LRP2BP	ENSCAFT00000012115.4:exon7:c.583-1G>T;ENSCAFT00000074281.1:exon5:c.505-1G>T			PRJNA518003	Mast Cell Tumor
SRR8510374-SRR8510375	chr21	41273249	41273249	T	C	ZDHHC13	Splice_Site					SNP	splicing	ZDHHC13	ENSCAFT00000014970.4:exon10:c.1110+2T>C			PRJNA518003	Mast Cell Tumor
SRR8510374-SRR8510375	chr9	41350533	41350535	TAG	T	RAB11FIP4	Splice_Site						splicing	RAB11FIP4				PRJNA518003	Mast Cell Tumor
SRR8510378-SRR8510383	chr14	55663644	55663644	G	T	MET	Splice_Site					SNP	splicing	MET	ENSCAFT00000086393.1:exon5:c.1821+1G>T;ENSCAFT00000086590.1:exon4:c.1629+1G>T;ENSCAFT00000049462.3:exon5:c.1821+1G>T;ENSCAFT00000005469.3:exon5:c.1821+1G>T;ENSCAFT00000064448.1:exon5:c.1704+1G>T			PRJNA518003	Mast Cell Tumor
SRR8510378-SRR8510383	chr2	48711243	48711243	G	T	KIF2A	Splice_Site					SNP	splicing	KIF2A	ENSCAFT00000011541.4:exon20:c.2554-1G>T;ENSCAFT00000044452.3:exon19:c.2440-1G>T			PRJNA518003	Mast Cell Tumor
SRR8510378-SRR8510383	chr24	17962547	17962547	G	T	C24H20orf194	Splice_Site					SNP	splicing	C24H20orf194	ENSCAFT00000010311.4:exon9:c.790-1G>T			PRJNA518003	Mast Cell Tumor
SRR8510378-SRR8510383	chr28	7673389	7673389	C	A	MYOF	Splice_Site					SNP	splicing	MYOF	ENSCAFT00000047470.3:exon19:c.1582-1G>T;ENSCAFT00000012483.5:exon18:c.1543-1G>T			PRJNA518003	Mast Cell Tumor
SRR8510378-SRR8510383	chr33	13914410	13914411	TA	T	DZIP3	Splice_Site						splicing	DZIP3	ENSCAFT00000016319.4:exon23:r.spl;ENSCAFT00000060001.1:exon22:r.spl			PRJNA518003	Mast Cell Tumor
SRR8510378-SRR8510383	chr36	30511099	30511099	G	T	COL3A1	Splice_Site					SNP	splicing	COL3A1	ENSCAFT00000023503.4:exon25:c.1762-1G>T;ENSCAFT00000047312.3:exon25:c.1762-1G>T			PRJNA518003	Mast Cell Tumor
SRR8510378-SRR8510383	chr6	28461530	28461530	G	T	PDXDC1	Splice_Site					SNP	splicing	PDXDC1	ENSCAFT00000073753.1:exon21:c.1906-1G>T;ENSCAFT00000090980.1:exon21:c.1906-1G>T;ENSCAFT00000077277.1:exon21:c.1906-1G>T;ENSCAFT00000081585.1:exon20:c.1855-1G>T;ENSCAFT00000084926.1:exon20:c.1825-1G>T;ENSCAFT00000073928.1:exon19:c.1633-1G>T;ENSCAFT00000029789.4:exon21:c.1906-1G>T			PRJNA518003	Mast Cell Tumor
SRR8510378-SRR8510383	chr9	19300958	19300958	C	A	G6PC3	Splice_Site					SNP	splicing	G6PC3	ENSCAFT00000061748.1:exon4:c.417-1G>T;ENSCAFT00000022829.4:exon4:c.417-1G>T			PRJNA518003	Mast Cell Tumor
SRR8510379-SRR8510380	chr1	117122835	117122835	C	T	GAPDHS	Splice_Site					SNP	splicing	GAPDHS	ENSCAFT00000011246.4:exon9:c.882-1G>A			PRJNA518003	Mast Cell Tumor
SRR8510379-SRR8510380	chr26	2344892	2344892	G	A	TMEM132D	Splice_Site					SNP	splicing	TMEM132D	ENSCAFT00000049250.3:exon3:c.975-1G>A			PRJNA518003	Mast Cell Tumor
SRR8510379-SRR8510380	chr5	55805412	55805412	G	A	SLC1A7	Splice_Site					SNP	splicing	SLC1A7	ENSCAFT00000030446.4:exon3:c.258-1G>A;ENSCAFT00000060129.1:exon3:c.258-1G>A;ENSCAFT00000090903.1:exon3:c.216-1G>A;ENSCAFT00000062380.1:exon3:c.93-1G>A			PRJNA518003	Mast Cell Tumor
SRR8510381-SRR8510382	chr10	20663193	20663193	G	T	SMC1B	Splice_Site					SNP	splicing	SMC1B	ENSCAFT00000049571.3:exon5:c.616-1G>T			PRJNA518003	Mast Cell Tumor
SRR8510381-SRR8510382	chr15	19358964	19358964	C	A	OSBPL8	Splice_Site					SNP	splicing	OSBPL8	ENSCAFT00000084410.1:exon13:c.1648-1G>T;ENSCAFT00000090754.1:exon16:c.1729-1G>T;ENSCAFT00000048113.2:exon12:c.1333-1G>T;ENSCAFT00000009206.6:exon14:c.1534-1G>T;ENSCAFT00000072630.1:exon14:c.1462-1G>T			PRJNA518003	Mast Cell Tumor
SRR8510381-SRR8510382	chr2	77462974	77462974	G	T	USP48	Splice_Site					SNP	splicing	USP48	ENSCAFT00000078982.1:exon17:c.2147-1G>T;ENSCAFT00000090482.1:exon17:c.1967-1G>T;ENSCAFT00000023542.4:exon17:c.2048-1G>T			PRJNA518003	Mast Cell Tumor
SRR8510381-SRR8510382	chr4	57535220	57535220	C	A	G3BP1	Splice_Site					SNP	splicing	G3BP1	ENSCAFT00000028303.4:exon14:c.1317-1G>T;ENSCAFT00000085592.1:exon13:c.1304-1G>T			PRJNA518003	Mast Cell Tumor
SRR8510381-SRR8510382	chr7	37933939	37933939	G	T	CDC42BPA	Splice_Site					SNP	splicing	CDC42BPA	ENSCAFT00000079678.1:exon8:c.895-1G>T;ENSCAFT00000086291.1:exon8:c.895-1G>T;ENSCAFT00000091113.1:exon8:c.895-1G>T;ENSCAFT00000072537.1:exon8:c.895-1G>T;ENSCAFT00000081249.1:exon8:c.895-1G>T;ENSCAFT00000064637.1:exon8:c.895-1G>T;ENSCAFT00000025396.5:exon8:c.895-1G>T;ENSCAFT00000067724.1:exon8:c.895-1G>T;ENSCAFT00000025398.5:exon8:c.895-1G>T;ENSCAFT00000025392.4:exon8:c.895-1G>T			PRJNA518003	Mast Cell Tumor
SRR8510381-SRR8510382	chr9	6820175	6820175	A	T	SDK2	Splice_Site					SNP	splicing	SDK2	ENSCAFT00000007243.5:exon22:c.3048-2A>T			PRJNA518003	Mast Cell Tumor
SRR8510384-SRR8510334	chr1	17683511	17683511	C	A	NEDD4L	Splice_Site					SNP	splicing	NEDD4L	ENSCAFT00000088503.1:exon12:c.844-1G>T;ENSCAFT00000078814.1:exon13:c.1021-1G>T;ENSCAFT00000059889.1:exon12:c.994-1G>T;ENSCAFT00000079043.1:exon11:c.790-1G>T;ENSCAFT00000080661.1:exon11:c.1246-1G>T;ENSCAFT00000045031.3:exon10:c.763-1G>T			PRJNA518003	Mast Cell Tumor
SRR8510384-SRR8510334	chr28	30032030	30032030	G	T	SEC23IP	Splice_Site					SNP	splicing	SEC23IP	ENSCAFT00000019531.4:exon13:c.2131-1G>T;ENSCAFT00000093345.1:exon12:c.2041-1G>T;ENSCAFT00000080782.1:exon13:c.2131-1G>T			PRJNA518003	Mast Cell Tumor
SRR8510384-SRR8510334	chr30	29108912	29108912	G	T	ZNF609	Splice_Site					SNP	splicing	ZNF609	ENSCAFT00000085417.1:exon3:c.974-1G>T;ENSCAFT00000027075.3:exon3:c.974-1G>T			PRJNA518003	Mast Cell Tumor
SRR8510384-SRR8510334	chr7	41602878	41602878	G	T	SMG5	Splice_Site					SNP	splicing	SMG5	ENSCAFT00000063044.1:exon3:c.174-1G>T;ENSCAFT00000075374.1:exon3:c.174-1G>T;ENSCAFT00000026665.4:exon3:c.174-1G>T			PRJNA518003	Mast Cell Tumor
SRR8510386-SRR8510385	chr15	18120382	18120382	G	T	TPPP2	Splice_Site					SNP	splicing	TPPP2	ENSCAFT00000078725.1:exon3:c.174-1G>T;ENSCAFT00000008814.4:exon3:c.174-1G>T;ENSCAFT00000075372.1:exon3:c.174-1G>T			PRJNA518003	Mast Cell Tumor
SRR8510386-SRR8510385	chr7	16211536	16211536	G	T	NPL	Splice_Site					SNP	splicing	NPL	ENSCAFT00000066617.1:exon5:c.289-1G>T;ENSCAFT00000020898.4:exon5:c.289-1G>T;ENSCAFT00000088273.1:exon5:c.289-1G>T			PRJNA518003	Mast Cell Tumor

## Sheet: Pulmonary Adenocarcinoma
Tumor_Sample_Barcode	Chromosome	Start_Position	End_Position	Reference_Allele	Tumor_Seq_Allele2	Hugo_Symbol	Variant_Classification	tx	exon	txChange	aaChange	Variant_Type	Func.refGene	Gene.refGene	GeneDetail.refGene	ExonicFunc.refGene	AAChange.refGene	Project	TumorType
SRR8653836-SRR8653949	chr10	26728936	26728936	C	A	MICALL1	Splice_Site					SNP	splicing	MICALL1	ENSCAFT00000002244.5:exon6:c.956+1G>T			PRJNA523624	Pulmonary Adenocarcinoma
SRR8653836-SRR8653949	chr3	30811008	30811008	C	A	POLK	Splice_Site					SNP	splicing	POLK	ENSCAFT00000062329.1:exon7:c.1059+1G>T;ENSCAFT00000014935.4:exon7:c.1059+1G>T;ENSCAFT00000046862.3:exon6:c.927+1G>T;ENSCAFT00000072314.1:exon8:c.1059+1G>T			PRJNA523624	Pulmonary Adenocarcinoma
SRR8653863-SRR8653849	chr13	47443084	47443084	C	T	KDR	Splice_Site					SNP	splicing	KDR	ENSCAFT00000003300.4:exon30:c.3846-1G>A			PRJNA523624	Pulmonary Adenocarcinoma
SRR8653863-SRR8653849	chr18	21342802	21342803	AC	A	HGF	Splice_Site						splicing	HGF	ENSCAFT00000010288.4:exon14:r.spl;ENSCAFT00000085974.1:exon13:r.spl;ENSCAFT00000090927.1:exon14:r.spl;ENSCAFT00000081523.1:exon14:r.spl			PRJNA523624	Pulmonary Adenocarcinoma
SRR8653975-SRR8653974	chr17	1870470	1870470	C	T	EIPR1	Splice_Site					SNP	splicing	EIPR1	ENSCAFT00000005219.4:exon9:c.990-1G>A;ENSCAFT00000091008.1:exon9:c.984-1G>A;ENSCAFT00000070103.1:exon8:c.987-1G>A			PRJNA523624	Pulmonary Adenocarcinoma
SRR8653975-SRR8653974	chr2	73934086	73934086	C	A	EXTL1	Splice_Site					SNP	splicing	EXTL1	ENSCAFT00000020161.4:exon9:c.1516-1G>T;ENSCAFT00000078509.1:exon8:c.1429-1G>T;ENSCAFT00000077119.1:exon7:c.1288-1G>T			PRJNA523624	Pulmonary Adenocarcinoma
SRR8653975-SRR8653974	chr24	33188262	33188262	T	TAAGGCA	CTSA	Splice_Site						splicing	CTSA	ENSCAFT00000015596.5:exon13:c.1323+2T>TAAGGCA;ENSCAFT00000079840.1:exon12:c.1272+2T>TAAGGCA;ENSCAFT00000066072.1:exon12:c.1269+2T>TAAGGCA			PRJNA523624	Pulmonary Adenocarcinoma
SRR8653975-SRR8653974	chr3	23711511	23711511	A	G	EDIL3	Splice_Site					SNP	splicing	EDIL3	ENSCAFT00000013454.4:exon7:c.652-2A>G;ENSCAFT00000062793.1:exon6:c.622-2A>G;ENSCAFT00000090737.1:exon6:c.523-2A>G			PRJNA523624	Pulmonary Adenocarcinoma

## Sheet: Urinary Carcinoma
Tumor_Sample_Barcode	Chromosome	Start_Position	End_Position	Reference_Allele	Tumor_Seq_Allele2	Hugo_Symbol	Variant_Classification	tx	exon	txChange	aaChange	Variant_Type	Func.refGene	Gene.refGene	GeneDetail.refGene	ExonicFunc.refGene	AAChange.refGene	Project	TumorType
SRR4037995-SRR4037994	chr24	19589501	19589501	G	T	NSFL1C	Splice_Site					SNP	splicing	NSFL1C	ENSCAFT00000010930.4:exon8:c.654-1G>T;ENSCAFT00000039044.4:exon6:c.555-1G>T;ENSCAFT00000087228.1:exon7:c.552-1G>T			PRJNA339175	Urinary Carcinoma
SRR4037995-SRR4037994	chr30	5865339	5865340	TG	T	RASGRP1	Splice_Site						splicing	RASGRP1	ENSCAFT00000013805.4:exon4:r.spl;ENSCAFT00000049651.3:exon4:r.spl;ENSCAFT00000063284.1:exon4:r.spl;ENSCAFT00000067196.1:exon4:r.spl			PRJNA339175	Urinary Carcinoma
SRR4037997-SRR4037996	chr1	17661886	17661886	C	T	NEDD4L	Splice_Site					SNP	splicing	NEDD4L	ENSCAFT00000088503.1:exon18:c.1551+1G>A;ENSCAFT00000078814.1:exon18:c.1530+1G>A;ENSCAFT00000077530.1:exon16:c.1278+1G>A;ENSCAFT00000059889.1:exon18:c.1701+1G>A;ENSCAFT00000000200.4:exon17:c.1593+1G>A;ENSCAFT00000092784.1:exon16:c.1473+1G>A;ENSCAFT00000079043.1:exon17:c.1497+1G>A;ENSCAFT00000080661.1:exon17:c.1953+1G>A;ENSCAFT00000045031.3:exon16:c.1470+1G>A			PRJNA339175	Urinary Carcinoma
SRR4037997-SRR4037996	chr17	48635471	48635471	G	T	PCGF1	Splice_Site					SNP	splicing	PCGF1	ENSCAFT00000013424.4:exon9:c.733-1G>T			PRJNA339175	Urinary Carcinoma
SRR4037997-SRR4037996	chr25	46971565	46971565	G	A	AGAP1	Splice_Site					SNP	splicing	AGAP1	ENSCAFT00000066571.1:exon18:c.2382+1G>A;ENSCAFT00000072449.1:exon16:c.2235+1G>A;ENSCAFT00000084704.1:exon15:c.2049+1G>A;ENSCAFT00000090717.1:exon19:c.2460+1G>A;ENSCAFT00000091344.1:exon18:c.2298+1G>A;ENSCAFT00000060219.1:exon17:c.2220+1G>A;ENSCAFT00000093914.1:exon17:c.2139+1G>A;ENSCAFT00000019261.4:exon18:c.2382+1G>A;ENSCAFT00000062236.1:exon17:c.2337+1G>A;ENSCAFT00000084541.1:exon17:c.2820+1G>A			PRJNA339175	Urinary Carcinoma
SRR4037997-SRR4037996	chr9	26574260	26574260	G	T	ABCC3	Splice_Site					SNP	splicing	ABCC3	ENSCAFT00000027259.4:exon12:c.1417-1G>T;ENSCAFT00000046338.3:exon12:c.1417-1G>T			PRJNA339175	Urinary Carcinoma

## Sheet: Melanoma
Tumor_Sample_Barcode	Chromosome	Start_Position	End_Position	Reference_Allele	Tumor_Seq_Allele2	Hugo_Symbol	Variant_Classification	tx	exon	txChange	aaChange	Variant_Type	Func.refGene	Gene.refGene	GeneDetail.refGene	ExonicFunc.refGene	AAChange.refGene	Project	TumorType
ERR1672133-ERR1672134	chr22	30734719	30734719	C	A	MYCBP2	Splice_Site					SNP	splicing	MYCBP2	ENSCAFT00000077115.1:exon37:c.5651+1G>T;ENSCAFT00000044597.3:exon37:c.5651+1G>T;ENSCAFT00000084227.1:exon36:c.5543+1G>T;ENSCAFT00000093725.1:exon36:c.5549+1G>T;ENSCAFT00000085895.1:exon37:c.5651+1G>T;ENSCAFT00000067781.1:exon37:c.5651+1G>T;ENSCAFT00000008311.4:exon37:c.5651+1G>T;ENSCAFT00000077346.1:exon36:c.5486+1G>T;ENSCAFT00000065179.1:exon35:c.5441+1G>T;ENSCAFT00000073319.1:exon37:c.5651+1G>T			ERP013521	Melanoma
ERR1672135-ERR1672136	chr2	59824882	59824882	C	T	GNAO1	Splice_Site					SNP	splicing	GNAO1	ENSCAFT00000014740.4:exon6:c.594-1G>A;ENSCAFT00000084393.1:exon6:c.594-1G>A			ERP013521	Melanoma
ERR1672139-ERR1672140	chr12	845248	845248	C	A	CCHCR1	Splice_Site					SNP	splicing	CCHCR1	ENSCAFT00000046522.3:exon12:c.1472+1G>T;ENSCAFT00000083499.1:exon12:c.1739+1G>T;ENSCAFT00000000761.4:exon12:c.1739+1G>T			ERP013521	Melanoma
ERR1672139-ERR1672140	chr5	33016014	33016014	A	G	AURKB	Splice_Site					SNP	splicing	AURKB	ENSCAFT00000063657.1:exon3:c.350+2T>C;ENSCAFT00000082255.1:exon4:c.563+2T>C;ENSCAFT00000065459.1:exon4:c.389+2T>C;ENSCAFT00000073242.1:exon6:c.275+2T>C;ENSCAFT00000026940.4:exon4:c.500+2T>C			ERP013521	Melanoma
ERR1672145-ERR1672146	chr7	31028777	31028777	C	G	POU2F1	Splice_Site					SNP	splicing	POU2F1	ENSCAFT00000024676.5:exon4:c.282+1G>C;ENSCAFT00000068502.1:exon4:c.282+1G>C;ENSCAFT00000024667.4:exon4:c.249+1G>C			ERP013521	Melanoma
ERR1672149-ERR1672150	chr5	63863871	63863871	G	A	VPS9D1	Splice_Site					SNP	splicing	VPS9D1	ENSCAFT00000031525.4:exon6:c.612+1G>A;ENSCAFT00000084919.1:exon5:c.435+1G>A			ERP013521	Melanoma
ERR1672153-ERR1672154	chr1	2986240	2986240	C	T	ZNF236	Splice_Site					SNP	splicing	ZNF236	ENSCAFT00000000028.4:exon22:c.3629-1G>A;ENSCAFT00000093974.1:exon2:UTR5			ERP013521	Melanoma
ERR1672155-ERR1672156	chr5	31006664	31006664	C	A	WSCD1	Splice_Site					SNP	splicing	WSCD1	ENSCAFT00000024555.3:exon5:c.849+1G>T;ENSCAFT00000075863.1:exon5:c.849+1G>T			ERP013521	Melanoma
ERR1672155-ERR1672156	chr9	34794200	34794200	T	G	INTS2	Splice_Site					SNP	splicing	INTS2	ENSCAFT00000028120.4:exon20:c.2685+2T>G;ENSCAFT00000045152.3:exon20:c.2685+2T>G			ERP013521	Melanoma
ERR1672161-ERR1672162	chr13	12448458	12448458	C	T	CSMD3	Splice_Site					SNP	splicing	CSMD3	ENSCAFT00000001238.5:exon59:c.9332-1G>A;ENSCAFT00000001231.4:exon57:c.8825-1G>A			ERP013521	Melanoma
ERR1672165-ERR1672166	chr30	37869081	37869081	G	A	CSK	Splice_Site					SNP	splicing	CSK	ENSCAFT00000028485.4:exon11:c.1083+1G>A			ERP013521	Melanoma
ERR1672167-ERR1672168	chr3	40049446	40049446	C	T	LRRK1	Splice_Site					SNP	splicing	LRRK1	ENSCAFT00000035359.4:exon10:c.1532+1G>A;ENSCAFT00000079594.1:exon10:c.1484+1G>A;ENSCAFT00000016843.4:exon10:c.1463+1G>A;ENSCAFT00000063546.1:exon10:c.1424+1G>A			ERP013521	Melanoma
ERR1672171-ERR1672172	chr26	17278013	17278013	G	GT	TRPV4	Splice_Site						splicing	TRPV4	ENSCAFT00000017136.2:exon3:c.296+1G>GT;ENSCAFT00000017196.4:exon2:UTR5;ENSCAFT00000078220.1:exon2:UTR5;ENSCAFT00000092695.1:exon2:UTR5			ERP013521	Melanoma
ERR1672175-ERR1672176	chr26	23516641	23516641	G	C	CCDC157	Splice_Site					SNP	splicing	CCDC157	ENSCAFT00000020121.4:exon9:c.1513-1G>C			ERP013521	Melanoma
ERR1672177-ERR1672178	chr25	15030553	15030553	C	T	TNFRSF19	Splice_Site					SNP	splicing	TNFRSF19	ENSCAFT00000071586.1:exon4:c.445+1G>A;ENSCAFT00000011444.4:exon4:c.445+1G>A			ERP013521	Melanoma
ERR1672179-ERR1672180	chr2	60276780	60276780	T	C	CES5A	Splice_Site					SNP	splicing	CES5A	ENSCAFT00000014854.4:exon1:c.52+2T>C			ERP013521	Melanoma
ERR1672186-ERR1672187	chr12	58861270	58861270	A	C	ASCC3	Splice_Site					SNP	splicing	ASCC3	ENSCAFT00000005717.4:exon8:c.1395+2T>G;ENSCAFT00000074604.1:exon8:c.801+2T>G			ERP013521	Melanoma
ERR1672186-ERR1672187	chr14	56346650	56346650	G	C	CFTR	Splice_Site					SNP	splicing	CFTR	ENSCAFT00000005518.4:exon8:c.870-1G>C;ENSCAFT00000062635.1:exon8:c.870-1G>C;ENSCAFT00000062415.1:exon8:c.870-1G>C;ENSCAFT00000063866.1:exon8:c.870-1G>C;ENSCAFT00000074449.1:exon8:c.870-1G>C;ENSCAFT00000059721.1:exon8:c.864-1G>C			ERP013521	Melanoma
ERR1672186-ERR1672187	chr15	63586941	63586941	G	A	ANXA10	Splice_Site					SNP	splicing	ANXA10	ENSCAFT00000014264.4:exon4:c.195+1G>A			ERP013521	Melanoma
ERR1672186-ERR1672187	chr27	34144803	34144803	G	A	LRP6	Splice_Site					SNP	splicing	LRP6	ENSCAFT00000080809.1:exon17:c.3733+1G>A;ENSCAFT00000021188.4:exon17:c.3733+1G>A;ENSCAFT00000083408.1:exon17:c.3733+1G>A;ENSCAFT00000087005.1:exon16:c.3535+1G>A;ENSCAFT00000091654.1:exon17:c.3733+1G>A			ERP013521	Melanoma
ERR1672186-ERR1672187	chr3	87141556	87141556	C	T	GBA3	Splice_Site					SNP	splicing	GBA3	ENSCAFT00000026177.4:exon3:c.1167+1G>A;ENSCAFT00000079020.1:exon3:c.1167+1G>A			ERP013521	Melanoma
ERR1672186-ERR1672187	chr9	47331846	47331846	C	T	SPATA22	Splice_Site					SNP	splicing	SPATA22	ENSCAFT00000050035.2:exon4:c.233+1G>A;ENSCAFT00000078589.1:exon2:c.104+1G>A;ENSCAFT00000077624.1:exon4:c.233+1G>A			ERP013521	Melanoma
ERR1672188-ERR1672189	chr18	41599936	41599936	C	T	PTPRJ	Splice_Site					SNP	splicing	PTPRJ	ENSCAFT00000048676.2:exon18:c.2979+1G>A;ENSCAFT00000013154.4:exon18:c.2976+1G>A			ERP013521	Melanoma
ERR1672188-ERR1672189	chr22	45971900	45971900	C	T	ABCC4	Splice_Site					SNP	splicing	ABCC4	ENSCAFT00000008769.4:exon2:c.185+1G>A;ENSCAFT00000091436.1:exon2:c.185+1G>A;ENSCAFT00000091800.1:exon2:c.185+1G>A;ENSCAFT00000065062.1:exon2:c.185+1G>A;ENSCAFT00000072512.1:exon2:c.185+1G>A;ENSCAFT00000075407.1:exon2:c.185+1G>A;ENSCAFT00000081284.1:exon2:c.185+1G>A;ENSCAFT00000065604.1:exon2:c.185+1G>A			ERP013521	Melanoma
ERR1672188-ERR1672189	chr24	22304707	22304707	G	A	BPIFB6	Splice_Site					SNP	splicing	BPIFB6	ENSCAFT00000011748.3:exon5:c.438-1G>A			ERP013521	Melanoma
ERR1672201-ERR1672202	chr5	13879397	13879397	G	C	TRIM29	Splice_Site					SNP	splicing	TRIM29	ENSCAFT00000019061.4:exon11:c.1702-1G>C			ERP013521	Melanoma
ERR1672206-ERR1672207	chr20	1719890	1719890	G	A	PODXL2	Splice_Site					SNP	splicing	PODXL2	ENSCAFT00000048052.3:exon1:c.16+1G>A			ERP013521	Melanoma
ERR1672210-ERR1672211	chr11	52213578	52213581	TGGG	T	TPM2	Splice_Site						splicing	TPM2				ERP013521	Melanoma
ERR1672210-ERR1672211	chr4	52931896	52931896	C	T	ITK	Splice_Site					SNP	splicing	ITK	ENSCAFT00000027842.4:exon7:c.648-1G>A			ERP013521	Melanoma
ERR1672212-ERR1672213	chr7	74966667	74966667	G	C	MTCL1	Splice_Site					SNP	splicing	MTCL1	ENSCAFT00000072580.1:exon16:c.4843-1G>C;ENSCAFT00000086137.1:exon15:c.4795-1G>C;ENSCAFT00000045245.3:exon15:c.4750-1G>C			ERP013521	Melanoma
ERR1672222-ERR1672223	chr2	59824882	59824882	C	T	GNAO1	Splice_Site					SNP	splicing	GNAO1	ENSCAFT00000014740.4:exon6:c.594-1G>A;ENSCAFT00000084393.1:exon6:c.594-1G>A			ERP013521	Melanoma
ERR1672224-ERR1672225	chr32	28534807	28534807	C	A	LEF1	Splice_Site					SNP	splicing	LEF1	ENSCAFT00000086599.1:exon10:c.1210-1G>T;ENSCAFT00000017891.4:exon10:c.1210-1G>T;ENSCAFT00000069847.1:exon9:c.1126-1G>T;ENSCAFT00000081685.1:exon8:c.721-1G>T;ENSCAFT00000064833.1:exon9:c.1012-1G>T			ERP013521	Melanoma
ERR1672226-ERR1672227	chr12	845248	845248	C	A	CCHCR1	Splice_Site					SNP	splicing	CCHCR1	ENSCAFT00000046522.3:exon12:c.1472+1G>T;ENSCAFT00000083499.1:exon12:c.1739+1G>T;ENSCAFT00000000761.4:exon12:c.1739+1G>T			ERP013521	Melanoma
ERR1672232-ERR1672233	chr7	31028777	31028777	C	G	POU2F1	Splice_Site					SNP	splicing	POU2F1	ENSCAFT00000024676.5:exon4:c.282+1G>C;ENSCAFT00000068502.1:exon4:c.282+1G>C;ENSCAFT00000024667.4:exon4:c.249+1G>C			ERP013521	Melanoma
ERR1672236-ERR1672237	chr10	43258305	43258305	T	C	EIF5B	Splice_Site					SNP	splicing	EIF5B	ENSCAFT00000003577.4:exon15:c.2269-2A>G;ENSCAFT00000049978.3:exon15:c.2272-2A>G			ERP013521	Melanoma
ERR1672242-ERR1672243	chr9	34794200	34794200	T	G	INTS2	Splice_Site					SNP	splicing	INTS2	ENSCAFT00000028120.4:exon20:c.2685+2T>G;ENSCAFT00000045152.3:exon20:c.2685+2T>G			ERP013521	Melanoma
ERR1672244-ERR1672245	chr20	50517857	50517857	C	A	ILF3	Splice_Site					SNP	splicing	ILF3	ENSCAFT00000028077.4:exon18:c.2072-1G>T			ERP013521	Melanoma
ERR1672248-ERR1672249	chr13	12448458	12448458	C	T	CSMD3	Splice_Site					SNP	splicing	CSMD3	ENSCAFT00000001238.5:exon59:c.9332-1G>A;ENSCAFT00000001231.4:exon57:c.8825-1G>A			ERP013521	Melanoma
ERR1672252-ERR1672253	chr30	37869081	37869081	G	A	CSK	Splice_Site					SNP	splicing	CSK	ENSCAFT00000028485.4:exon11:c.1083+1G>A			ERP013521	Melanoma
ERR1672256-ERR1672257	chr26	8330668	8330668	T	C	RAD9B	Splice_Site					SNP	splicing	RAD9B	ENSCAFT00000044995.2:exon8:c.755+2T>C;ENSCAFT00000013483.5:exon8:c.764+2T>C;ENSCAFT00000077619.1:exon8:c.704+2T>C;ENSCAFT00000072865.1:exon8:c.728+2T>C			ERP013521	Melanoma
ERR1672258-ERR1672259	chr26	17278013	17278013	G	GT	TRPV4	Splice_Site						splicing	TRPV4	ENSCAFT00000017136.2:exon3:c.296+1G>GT;ENSCAFT00000017196.4:exon2:UTR5;ENSCAFT00000078220.1:exon2:UTR5;ENSCAFT00000092695.1:exon2:UTR5			ERP013521	Melanoma
ERR1672262-ERR1672263	chr26	23516641	23516641	G	C	CCDC157	Splice_Site					SNP	splicing	CCDC157	ENSCAFT00000020121.4:exon9:c.1513-1G>C			ERP013521	Melanoma
ERR1672266-ERR1672267	chr36	25127933	25127933	G	A	PPP1R1C	Splice_Site					SNP	splicing	PPP1R1C	ENSCAFT00000022605.4:exon2:c.163+1G>A			ERP013521	Melanoma
ERR1672273-ERR1672274	chr12	58861270	58861270	A	C	ASCC3	Splice_Site					SNP	splicing	ASCC3	ENSCAFT00000005717.4:exon8:c.1395+2T>G;ENSCAFT00000074604.1:exon8:c.801+2T>G			ERP013521	Melanoma
ERR1672273-ERR1672274	chr14	56346650	56346650	G	C	CFTR	Splice_Site					SNP	splicing	CFTR	ENSCAFT00000005518.4:exon8:c.870-1G>C;ENSCAFT00000062635.1:exon8:c.870-1G>C;ENSCAFT00000062415.1:exon8:c.870-1G>C;ENSCAFT00000063866.1:exon8:c.870-1G>C;ENSCAFT00000074449.1:exon8:c.870-1G>C;ENSCAFT00000059721.1:exon8:c.864-1G>C			ERP013521	Melanoma
ERR1672273-ERR1672274	chr3	40042426	40042426	C	T	LRRK1	Splice_Site					SNP	splicing	LRRK1	ENSCAFT00000035359.4:exon13:c.1740-1G>A;ENSCAFT00000079594.1:exon13:c.1692-1G>A;ENSCAFT00000016843.4:exon13:c.1671-1G>A;ENSCAFT00000063546.1:exon13:c.1632-1G>A			ERP013521	Melanoma
ERR1672275-ERR1672276	chr18	41599936	41599936	C	T	PTPRJ	Splice_Site					SNP	splicing	PTPRJ	ENSCAFT00000048676.2:exon18:c.2979+1G>A;ENSCAFT00000013154.4:exon18:c.2976+1G>A			ERP013521	Melanoma
ERR1681423-ERR1681424	chr20	1719890	1719890	G	A	PODXL2	Splice_Site					SNP	splicing	PODXL2	ENSCAFT00000048052.3:exon1:c.16+1G>A			ERP013521	Melanoma
ERR1681425-ERR1681426	chr10	26291517	26291517	G	A	DDX17	Splice_Site					SNP	splicing	DDX17	ENSCAFT00000002162.6:exon6:c.880+1G>A;ENSCAFT00000037931.3:exon6:c.643+1G>A			ERP013521	Melanoma
ERR1681425-ERR1681426	chr36	20123851	20123851	G	A	MTX2	Splice_Site					SNP	splicing	MTX2	ENSCAFT00000021295.4:exon7:c.845+1G>A;ENSCAFT00000091042.1:exon9:c.620+1G>A;ENSCAFT00000082460.1:exon6:c.452+1G>A;ENSCAFT00000063846.1:exon9:c.620+1G>A			ERP013521	Melanoma
ERR1681427-ERR1681428	chr25	51391541	51391541	G	A	FARP2	Splice_Site					SNP	splicing	FARP2	ENSCAFT00000073968.1:exon10:c.888+1G>A;ENSCAFT00000049886.3:exon10:c.888+1G>A;ENSCAFT00000020637.4:exon7:c.783+1G>A			ERP013521	Melanoma
ERR1681427-ERR1681428	chr36	11493886	11493886	C	T	SCN7A	Splice_Site					SNP	splicing	SCN7A	ENSCAFT00000018504.4:exon19:c.3120+1G>A			ERP013521	Melanoma
ERR1681427-ERR1681428	chr4	52931896	52931896	C	T	ITK	Splice_Site					SNP	splicing	ITK	ENSCAFT00000027842.4:exon7:c.648-1G>A			ERP013521	Melanoma
ERR1681429-ERR1681430	chr7	74966667	74966667	G	C	MTCL1	Splice_Site					SNP	splicing	MTCL1	ENSCAFT00000072580.1:exon16:c.4843-1G>C;ENSCAFT00000086137.1:exon15:c.4795-1G>C;ENSCAFT00000045245.3:exon15:c.4750-1G>C			ERP013521	Melanoma
ERR1681435-ERR1681436	chr19	37861917	37861917	G	C	RAB3GAP1	Splice_Site					SNP	splicing	RAB3GAP1	ENSCAFT00000087073.1:exon1:c.50+1G>C			ERP013521	Melanoma
ERR1681435-ERR1681436	chr28	16041026	16041026	T	C	SH3PXD2A	Splice_Site					SNP	splicing	SH3PXD2A	ENSCAFT00000060602.1:exon4:c.235-2A>G;ENSCAFT00000016636.5:exon3:c.154-2A>G;ENSCAFT00000081478.1:exon3:c.400-2A>G;ENSCAFT00000071892.1:exon3:c.400-2A>G			ERP013521	Melanoma
ERR1681437-ERR1681438	chr30	11542270	11542270	G	A	DUOXA2	Splice_Site					SNP	splicing	DUOXA2	ENSCAFT00000021730.4:exon1:c.147+1G>A			ERP013521	Melanoma
ERR1681444-ERR1681445	chr1	46775491	46775491	G	A	ARID1B	Splice_Site					SNP	splicing	ARID1B	ENSCAFT00000067903.1:exon14:c.1216-1G>A;ENSCAFT00000000940.5:exon13:c.1057-1G>A;ENSCAFT00000062255.1:exon12:c.1036-1G>A			ERP013521	Melanoma
ERR1681454-ERR1681455	chr18	15250881	15250881	T	C	KMT2E	Splice_Site					SNP	splicing	KMT2E	ENSCAFT00000068954.1:exon16:c.1888-2A>G;ENSCAFT00000072849.1:exon15:c.1849-2A>G;ENSCAFT00000064358.1:exon16:c.1888-2A>G;ENSCAFT00000006640.4:exon14:c.1660-2A>G;ENSCAFT00000006618.5:exon16:c.1450-2A>G			ERP013521	Melanoma
ERR1681454-ERR1681455	chr20	47898890	47898891	TG	T	ADGRE2	Splice_Site						splicing	ADGRE2	ENSCAFT00000025772.5:exon15:r.spl			ERP013521	Melanoma
ERR1681456-ERR1681457	chr36	21221461	21221461	G	T	AGPS	Splice_Site					SNP	splicing	AGPS	ENSCAFT00000042787.3:exon13:c.1289-1G>T;ENSCAFT00000021460.4:exon13:c.1289-1G>T;ENSCAFT00000090780.1:exon13:c.1094-1G>T			ERP013521	Melanoma
ERR1681456-ERR1681457	chr9	45176556	45176556	G	A	VPS53	Splice_Site					SNP	splicing	VPS53	ENSCAFT00000030338.3:exon17:c.1866+1G>A			ERP013521	Melanoma
ERR1681480-ERR1681481	chr19	37861917	37861917	G	C	RAB3GAP1	Splice_Site					SNP	splicing	RAB3GAP1	ENSCAFT00000087073.1:exon1:c.50+1G>C			ERP013521	Melanoma
ERR1681480-ERR1681481	chr28	16041026	16041026	T	C	SH3PXD2A	Splice_Site					SNP	splicing	SH3PXD2A	ENSCAFT00000060602.1:exon4:c.235-2A>G;ENSCAFT00000016636.5:exon3:c.154-2A>G;ENSCAFT00000081478.1:exon3:c.400-2A>G;ENSCAFT00000071892.1:exon3:c.400-2A>G			ERP013521	Melanoma
ERR1681499-ERR1681500	chr20	47898890	47898891	TG	T	ADGRE2	Splice_Site						splicing	ADGRE2	ENSCAFT00000025772.5:exon15:r.spl			ERP013521	Melanoma
ERR1681501-ERR1681502	chr36	21221461	21221461	G	T	AGPS	Splice_Site					SNP	splicing	AGPS	ENSCAFT00000042787.3:exon13:c.1289-1G>T;ENSCAFT00000021460.4:exon13:c.1289-1G>T;ENSCAFT00000090780.1:exon13:c.1094-1G>T			ERP013521	Melanoma
ERR1681510-ERR1681511	chr5	39313433	39313433	G	A	ZNF624	Splice_Site					SNP	splicing	ZNF624	ENSCAFT00000046525.2:exon4:c.151-1G>A			ERP013521	Melanoma
ERR2396466-ERR2396467	chr10	20398723	20398723	C	T	ATXN10	Splice_Site					SNP	splicing	ATXN10	ENSCAFT00000086633.1:exon5:c.647+1G>A;ENSCAFT00000086381.1:exon5:c.647+1G>A;ENSCAFT00000043595.2:exon5:c.647+1G>A;ENSCAFT00000085365.1:exon5:c.647+1G>A;ENSCAFT00000066102.1:exon4:c.455+1G>A;ENSCAFT00000074653.1:exon5:c.647+1G>A			ERP013521	Melanoma
ERR2396466-ERR2396467	chr9	34307351	34307351	G	A	VMP1	Splice_Site					SNP	splicing	VMP1	ENSCAFT00000028015.4:exon9:c.912+1G>A			ERP013521	Melanoma
ERR2396468-ERR2396469	chr17	21142049	21142049	G	C	TCF23	Splice_Site					SNP	splicing	TCF23	ENSCAFT00000046022.2:exon2:c.465+1G>C			ERP013521	Melanoma
ERR2396468-ERR2396469	chr2	69439171	69439171	G	A	COL16A1	Splice_Site					SNP	splicing	COL16A1	ENSCAFT00000082020.1:exon46:c.3039+1G>A;ENSCAFT00000069543.1:exon45:c.3003+1G>A;ENSCAFT00000017413.4:exon46:c.3039+1G>A;ENSCAFT00000075322.1:exon45:c.2991+1G>A;ENSCAFT00000044541.3:exon46:c.3039+1G>A			ERP013521	Melanoma
ERR2496954-ERR2496955	chr17	21142049	21142049	G	C	TCF23	Splice_Site					SNP	splicing	TCF23	ENSCAFT00000046022.2:exon2:c.465+1G>C			ERP013521	Melanoma
SRR17139203-SRR17139204	chr33	13924559	13924559	T	C	DZIP3	Splice_Site					SNP	splicing	DZIP3	ENSCAFT00000016319.4:exon29:c.3267+2T>C;ENSCAFT00000060001.1:exon28:c.3177+2T>C			PRJNA786469	Melanoma
SRR17139297-SRR17139299	chr27	42304971	42304971	C	T	SLC6A12	Splice_Site					SNP	splicing	SLC6A12	ENSCAFT00000067349.1:exon11:c.1312-1G>A;ENSCAFT00000092986.1:exon11:c.1186-1G>A;ENSCAFT00000024989.4:exon9:c.1036-1G>A;ENSCAFT00000089097.1:exon11:c.1186-1G>A			PRJNA786469	Melanoma
SRR17139302-SRR17139303	chr10	16966294	16966294	G	T	PLXNB2	Splice_Site					SNP	splicing	PLXNB2	ENSCAFT00000001052.4:exon6:c.1979-1G>T			PRJNA786469	Melanoma
SRR17139302-SRR17139303	chr18	12671945	12671945	G	A	LAMB1	Splice_Site					SNP	splicing	LAMB1	ENSCAFT00000087385.1:exon21:c.2851+1G>A;ENSCAFT00000006148.4:exon18:c.2518+1G>A			PRJNA786469	Melanoma
SRR17139302-SRR17139303	chr8	4066082	4066082	G	A	CARMIL3	Splice_Site					SNP	splicing	CARMIL3	ENSCAFT00000018562.4:exon19:c.1475-1G>A;ENSCAFT00000059836.1:exon19:c.1475-1G>A;ENSCAFT00000062426.1:exon19:c.1475-1G>A			PRJNA786469	Melanoma
SRR17139317-SRR17139318	chr19	18010257	18010257	C	A	KIAA1109	Splice_Site					SNP	splicing	KIAA1109	ENSCAFT00000064593.1:exon7:c.546-1G>T;ENSCAFT00000063269.1:exon7:c.546-1G>T;ENSCAFT00000036772.4:exon7:c.546-1G>T;ENSCAFT00000006460.4:exon7:c.546-1G>T			PRJNA786469	Melanoma
SRR17139319-SRR17139321	chr5	45061335	45061335	C	G	DNAJC6	Splice_Site					SNP	splicing	DNAJC6	ENSCAFT00000029543.4:exon3:c.438+1G>C			PRJNA786469	Melanoma
SRR7459230-SRR7459234	chr33	17724093	17724093	C	A	CFAP44	Splice_Site					SNP	splicing	CFAP44	ENSCAFT00000016874.5:exon12:c.1486+1G>T			SRP151732	Melanoma
SRR7459231-SRR7459235	chr20	48915523	48915523	G	A	CACNA1A	Splice_Site					SNP	splicing	CACNA1A	ENSCAFT00000026809.4:exon4:c.540-1G>A;ENSCAFT00000066427.1:exon4:c.540-1G>A;ENSCAFT00000065563.1:exon4:c.540-1G>A;ENSCAFT00000063287.1:exon3:c.399-1G>A			SRP151732	Melanoma

## Sheet: Osteosarcoma
Tumor_Sample_Barcode	Chromosome	Start_Position	End_Position	Reference_Allele	Tumor_Seq_Allele2	Hugo_Symbol	Variant_Classification	tx	exon	txChange	aaChange	Variant_Type	Func.refGene	Gene.refGene	GeneDetail.refGene	ExonicFunc.refGene	AAChange.refGene	Project	TumorType
SRR11392160-SRR11352508	chr13	35921403	35921403	C	T	MROH5	Splice_Site					SNP	splicing	MROH5	ENSCAFT00000001944.4:exon14:c.1746+1G>A			PRJNA613479-PRJNA503860	Osteosarcoma
SRR11392160-SRR11352508	chr5	32564065	32564065	C	G	TP53	Splice_Site					SNP	splicing	TP53	ENSCAFT00000026465.4:exon5:c.337-1G>C;ENSCAFT00000081814.1:exon5:c.529-1G>C;ENSCAFT00000086831.1:exon3:c.268-1G>C			PRJNA613479-PRJNA503860	Osteosarcoma
SRR11392163-SRR11352532	chr5	14714067	14714067	A	G	ABCG4	Splice_Site					SNP	splicing	ABCG4	ENSCAFT00000019413.4:exon7:c.810+2T>C;ENSCAFT00000080715.1:exon7:c.810+2T>C			PRJNA613479-PRJNA503860	Osteosarcoma
SRR11392164-SRR11352513	chr11	50743537	50743537	C	A	UBAP2	Splice_Site					SNP	splicing	UBAP2	ENSCAFT00000002996.4:exon4:c.442+1G>T;ENSCAFT00000075744.1:exon4:c.442+1G>T;ENSCAFT00000071946.1:exon4:c.472+1G>T;ENSCAFT00000046654.3:exon4:c.442+1G>T;ENSCAFT00000081872.1:exon4:c.442+1G>T;ENSCAFT00000082737.1:exon4:c.442+1G>T;ENSCAFT00000093550.1:exon3:c.610+1G>T			PRJNA613479-PRJNA503860	Osteosarcoma
SRR11392164-SRR11352513	chr5	42750182	42750182	G	C	MAP2K3	Splice_Site					SNP	splicing	MAP2K3	ENSCAFT00000072751.1:exon6:c.909+1G>C;ENSCAFT00000036730.2:exon5:c.366+1G>C;ENSCAFT00000074869.1:exon5:c.399+1G>C;ENSCAFT00000036732.4:exon5:c.399+1G>C			PRJNA613479-PRJNA503860	Osteosarcoma
SRR11392165-SRR11352514	chr10	15843981	15843981	T	A	CAPS2	Splice_Site					SNP	splicing	CAPS2	ENSCAFT00000067382.1:exon18:c.1622-2A>T			PRJNA613479-PRJNA503860	Osteosarcoma
SRR11392166-SRR11352515	chr14	35629244	35629244	T	A	DNAH11	Splice_Site					SNP	splicing	DNAH11	ENSCAFT00000004311.4:exon48:c.7820+2T>A			PRJNA613479-PRJNA503860	Osteosarcoma
SRR11392167-SRR11352516	chr23	9755712	9755712	A	C	MYRIP	Splice_Site					SNP	splicing	MYRIP	ENSCAFT00000008225.4:exon14:c.2317-2A>C;ENSCAFT00000078341.1:exon13:c.2122-2A>C;ENSCAFT00000073596.1:exon12:c.2113-2A>C;ENSCAFT00000065058.1:exon12:c.2095-2A>C;ENSCAFT00000087184.1:exon14:c.2317-2A>C;ENSCAFT00000064390.1:exon13:c.2257-2A>C;ENSCAFT00000065441.1:exon11:c.1990-2A>C			PRJNA613479-PRJNA503860	Osteosarcoma
SRR11392167-SRR11352516	chr26	38437433	38437433	G	A	LIPF	Splice_Site					SNP	splicing	LIPF	ENSCAFT00000036576.3:exon8:c.945+1G>A;ENSCAFT00000081719.1:exon8:c.945+1G>A			PRJNA613479-PRJNA503860	Osteosarcoma
SRR11392168-SRR11352517	chr34	11265116	11265116	T	TG	CLPTM1L	Splice_Site						splicing	CLPTM1L	ENSCAFT00000017076.4:exon3:c.453+2T>TG			PRJNA613479-PRJNA503860	Osteosarcoma
SRR11392169-SRR11352518	chr3	32964404	32964404	C	T	GABRG3	Splice_Site					SNP	splicing	GABRG3	ENSCAFT00000015775.3:exon10:c.1123-1G>A			PRJNA613479-PRJNA503860	Osteosarcoma
SRR11392170-SRR11352512	chr3	61098656	61098656	C	T	HTT	Splice_Site					SNP	splicing	HTT	ENSCAFT00000082366.1:exon47:c.6591+1G>A;ENSCAFT00000082964.1:exon52:c.7053+1G>A;ENSCAFT00000085601.1:exon52:c.6870+1G>A;ENSCAFT00000023312.5:exon52:c.7206+1G>A;ENSCAFT00000080545.1:exon51:c.7158+1G>A;ENSCAFT00000084310.1:exon51:c.7095+1G>A;ENSCAFT00000092447.1:exon51:c.7083+1G>A			PRJNA613479-PRJNA503860	Osteosarcoma
SRR11392170-SRR11352512	chr5	32563462	32563462	C	T	TP53	Splice_Site					SNP	splicing	TP53	ENSCAFT00000026465.4:exon7:c.637-1G>A;ENSCAFT00000081814.1:exon7:c.829-1G>A;ENSCAFT00000086831.1:exon5:c.568-1G>A			PRJNA613479-PRJNA503860	Osteosarcoma
SRR11392172-SRR11352521	chr16	59032266	59032266	A	T	DEFB105A	Splice_Site					SNP	splicing	DEFB105A	ENSCAFT00000038314.3:exon2:c.71-2A>T			PRJNA613479-PRJNA503860	Osteosarcoma
SRR11392172-SRR11352521	chr26	19599298	19599298	G	A	MYO18B	Splice_Site					SNP	splicing	MYO18B	ENSCAFT00000018507.4:exon15:c.2944-1G>A;ENSCAFT00000070650.1:exon15:c.2944-1G>A;ENSCAFT00000081663.1:exon15:c.2944-1G>A;ENSCAFT00000062006.1:exon14:c.2770-1G>A			PRJNA613479-PRJNA503860	Osteosarcoma
SRR11392172-SRR11352521	chr5	14714067	14714067	A	G	ABCG4	Splice_Site					SNP	splicing	ABCG4	ENSCAFT00000019413.4:exon7:c.810+2T>C;ENSCAFT00000080715.1:exon7:c.810+2T>C			PRJNA613479-PRJNA503860	Osteosarcoma
SRR11392172-SRR11352521	chr5	31758312	31758312	C	T	PLD2	Splice_Site					SNP	splicing	PLD2	ENSCAFT00000025112.4:exon19:c.2013-1G>A			PRJNA613479-PRJNA503860	Osteosarcoma
SRR11392173-SRR11352522	chr5	10252370	10252370	T	C	OR8G3	Splice_Site					SNP	splicing	OR8G3	ENSCAFT00000047685.2:exon2:c.3-2A>G			PRJNA613479-PRJNA503860	Osteosarcoma
SRR11392174-SRR11352523	chr37	17822742	17822742	A	C	UNC80	Splice_Site					SNP	splicing	UNC80	ENSCAFT00000021863.5:exon47:c.7035-2A>C;ENSCAFT00000021888.5:exon47:c.7020-2A>C			PRJNA613479-PRJNA503860	Osteosarcoma
SRR11392174-SRR11352523	chr4	37383298	37383298	G	T	HRH2	Splice_Site					SNP	splicing	HRH2	ENSCAFT00000026470.4:exon3:c.1117-1C>A			PRJNA613479-PRJNA503860	Osteosarcoma
SRR11392175-SRR11352524	chr15	42765625	42765625	A	G	SMARCA5	Splice_Site					SNP	splicing	SMARCA5	ENSCAFT00000012062.3:exon20:c.2521-2A>G;ENSCAFT00000088971.1:exon20:c.2521-2A>G			PRJNA613479-PRJNA503860	Osteosarcoma
SRR11392176-SRR11352525	chr31	37006536	37006536	T	A	PDE9A	Splice_Site					SNP	splicing	PDE9A	ENSCAFT00000042853.3:exon5:c.434+2T>A;ENSCAFT00000016669.4:exon5:c.776+2T>A;ENSCAFT00000059732.1:exon5:c.776+2T>A			PRJNA613479-PRJNA503860	Osteosarcoma
SRR11392176-SRR11352525	chr38	778653	778653	C	T	GOLT1A	Splice_Site					SNP	splicing	GOLT1A	ENSCAFT00000015295.4:exon2:c.117+1G>A;ENSCAFT00000078028.1:exon2:c.117+1G>A			PRJNA613479-PRJNA503860	Osteosarcoma
SRR11392176-SRR11352525	chr5	31758312	31758312	C	T	PLD2	Splice_Site					SNP	splicing	PLD2	ENSCAFT00000025112.4:exon19:c.2013-1G>A			PRJNA613479-PRJNA503860	Osteosarcoma
SRR11392177-SRR11352526	chr13	12420312	12420312	T	G	CSMD3	Splice_Site					SNP	splicing	CSMD3	ENSCAFT00000001238.5:exon65:c.10223-2A>C;ENSCAFT00000001231.4:exon63:c.9716-2A>C			PRJNA613479-PRJNA503860	Osteosarcoma
SRR11392177-SRR11352526	chr4	75207166	75207166	G	A	MTMR12	Splice_Site					SNP	splicing	MTMR12	ENSCAFT00000030022.3:exon12:c.1126+1G>A;ENSCAFT00000085994.1:exon12:c.1126+1G>A;ENSCAFT00000060673.1:exon12:c.1126+1G>A			PRJNA613479-PRJNA503860	Osteosarcoma
SRR11392178-SRR11352527	chr10	50793921	50793921	A	G	FSHR	Splice_Site					SNP	splicing	FSHR	ENSCAFT00000071795.1:exon7:c.449+2T>C;ENSCAFT00000069633.1:exon7:c.560+2T>C;ENSCAFT00000004260.3:exon6:c.524+2T>C;ENSCAFT00000078079.1:exon5:c.449+2T>C;ENSCAFT00000091957.1:exon6:c.524+2T>C			PRJNA613479-PRJNA503860	Osteosarcoma
SRR13123343-SRR13123352	chr1	35387559	35387559	G	T	ZC2HC1B	Splice_Site					SNP	splicing	ZC2HC1B	ENSCAFT00000037946.3:exon3:c.91-1G>T			PRJNA680382	Osteosarcoma
SRR13123343-SRR13123352	chr20	32812527	32812527	G	T	DENND6A	Splice_Site					SNP	splicing	DENND6A	ENSCAFT00000012398.5:exon11:c.941+1G>T;ENSCAFT00000044269.2:exon10:c.782+1G>T			PRJNA680382	Osteosarcoma
SRR13123343-SRR13123352	chr20	37178689	37178689	G	T	PBRM1	Splice_Site					SNP	splicing	PBRM1	ENSCAFT00000071283.1:exon18:c.2496-1G>T;ENSCAFT00000014499.4:exon17:c.2472-1G>T;ENSCAFT00000089098.1:exon19:c.2613-1G>T;ENSCAFT00000074133.1:exon21:c.2676-1G>T;ENSCAFT00000084707.1:exon21:c.2676-1G>T;ENSCAFT00000014524.5:exon21:c.2676-1G>T;ENSCAFT00000066906.1:exon21:c.2676-1G>T;ENSCAFT00000072110.1:exon21:c.2676-1G>T;ENSCAFT00000074388.1:exon21:c.2676-1G>T;ENSCAFT00000078219.1:exon20:c.2631-1G>T			PRJNA680382	Osteosarcoma
SRR13123343-SRR13123352	chr29	40792928	40792928	G	T	PTDSS1	Splice_Site					SNP	splicing	PTDSS1	ENSCAFT00000078161.1:exon5:c.442-1G>T;ENSCAFT00000015054.4:exon5:c.442-1G>T;ENSCAFT00000082219.1:exon5:c.442-1G>T;ENSCAFT00000066206.1:exon5:c.442-1G>T			PRJNA680382	Osteosarcoma
SRR13123343-SRR13123352	chr6	55097033	55097033	G	T	ABCA4	Splice_Site					SNP	splicing	ABCA4	ENSCAFT00000032029.5:exon9:c.1100-1G>T;ENSCAFT00000005367.5:exon9:c.1100-1G>T			PRJNA680382	Osteosarcoma
SRR13123349-SRR13123338	chr15	42753402	42753402	G	C	SMARCA5	Splice_Site					SNP	splicing	SMARCA5	ENSCAFT00000012062.3:exon10:c.1159-1G>C;ENSCAFT00000088971.1:exon10:c.1159-1G>C			PRJNA680382	Osteosarcoma
SRR13123349-SRR13123338	chr17	18246116	18246116	G	T	KLHL29	Splice_Site					SNP	splicing	KLHL29	ENSCAFT00000006294.4:exon12:c.2299+1G>T			PRJNA680382	Osteosarcoma
SRR13123349-SRR13123338	chr2	55960275	55960275	G	T	FCHO2	Splice_Site					SNP	splicing	FCHO2	ENSCAFT00000013009.4:exon10:c.906+1G>T;ENSCAFT00000091775.1:exon10:c.867+1G>T;ENSCAFT00000090509.1:exon9:c.807+1G>T			PRJNA680382	Osteosarcoma
SRR13123349-SRR13123338	chr20	44820625	44820625	C	T	IFI30	Splice_Site					SNP	splicing	IFI30	ENSCAFT00000023729.4:exon5:c.487-1G>A			PRJNA680382	Osteosarcoma
SRR13123349-SRR13123338	chr5	76539285	76539285	G	T	SF3B3	Splice_Site					SNP	splicing	SF3B3	ENSCAFT00000032086.4:exon21:c.2952+1G>T;ENSCAFT00000091919.1:exon20:c.2856+1G>T			PRJNA680382	Osteosarcoma
SRR13123349-SRR13123338	chr6	11540822	11540822	G	T	USP42	Splice_Site					SNP	splicing	USP42	ENSCAFT00000024838.4:exon8:c.990+1G>T;ENSCAFT00000069306.1:exon8:c.990+1G>T;ENSCAFT00000091389.1:exon7:c.789+1G>T			PRJNA680382	Osteosarcoma
SRR13123349-SRR13123338	chr7	38961173	38961173	G	T	TMEM63A	Splice_Site					SNP	splicing	TMEM63A	ENSCAFT00000081481.1:exon19:c.2436+1G>T;ENSCAFT00000081481.1:exon19:UTR3;ENSCAFT00000071014.1:exon20:c.2176+1G>T;ENSCAFT00000025640.4:exon20:c.1933+1G>T			PRJNA680382	Osteosarcoma
SRR13123349-SRR13123338	chr8	63109374	63109374	G	T	OTUB2	Splice_Site					SNP	splicing	OTUB2	ENSCAFT00000080561.1:exon5:c.561+1G>T;ENSCAFT00000070571.1:exon5:c.561+1G>T;ENSCAFT00000071064.1:exon4:c.303+1G>T;ENSCAFT00000027936.4:exon5:c.561+1G>T			PRJNA680382	Osteosarcoma
SRR5836926-SRR5836925	chr9	12342230	12342230	G	T	CEP95	Splice_Site					SNP	splicing	CEP95	ENSCAFT00000018575.4:exon20:c.2275-1G>T;ENSCAFT00000089143.1:exon19:c.2164-1G>T;ENSCAFT00000089130.1:exon18:c.2053-1G>T;ENSCAFT00000078867.1:exon19:c.2203-1G>T;ENSCAFT00000087222.1:exon19:c.2146-1G>T			PRJNA391455	Osteosarcoma
SRR5836940-SRR5836939	chr10	2738560	2738560	T	TG	LRIG3	Splice_Site						splicing	LRIG3	ENSCAFT00000000481.4:exon10:c.936-2A>CA;ENSCAFT00000062755.1:exon10:c.1074-2A>CA			PRJNA391455	Osteosarcoma
SRR5836940-SRR5836939	chr6	62012482	62012482	G	T	COL24A1	Splice_Site					SNP	splicing	COL24A1	ENSCAFT00000035747.3:exon11:c.1890+1G>T			PRJNA391455	Osteosarcoma
SRR5836949-SRR5836950	chr20	41719223	41719223	G	T	SETD2	Splice_Site					SNP	splicing	SETD2	ENSCAFT00000077709.1:exon5:c.4709+1G>T;ENSCAFT00000021260.4:exon5:c.4709+1G>T;ENSCAFT00000071377.1:exon5:c.4709+1G>T;ENSCAFT00000089264.1:exon5:c.4709+1G>T;ENSCAFT00000072365.1:exon5:c.4709+1G>T;ENSCAFT00000064752.1:exon5:c.4709+1G>T;ENSCAFT00000060515.1:exon5:c.4709+1G>T;ENSCAFT00000076367.1:exon5:c.365+1G>T			PRJNA391455	Osteosarcoma
SRR5836949-SRR5836950	chr20	42717446	42717446	G	A	SLC6A20	Splice_Site					SNP	splicing	SLC6A20	ENSCAFT00000022142.4:exon8:c.1207+1G>A			PRJNA391455	Osteosarcoma
SRR5836949-SRR5836950	chr4	64112530	64112530	T	G	PARP8	Splice_Site					SNP	splicing	PARP8	ENSCAFT00000029349.4:exon26:c.2463-2A>C;ENSCAFT00000076913.1:exon26:c.2463-2A>C;ENSCAFT00000059658.1:exon25:c.2385-2A>C;ENSCAFT00000070753.1:exon25:c.2337-2A>C;ENSCAFT00000086630.1:exon26:c.2415-2A>C;ENSCAFT00000090947.1:exon22:c.2214-2A>C			PRJNA391455	Osteosarcoma
SRR5836953-SRR5836954	chr20	52263761	52263761	G	C	ARHGEF18	Splice_Site					SNP	splicing	ARHGEF18	ENSCAFT00000028939.5:exon12:c.1416-1G>C			PRJNA391455	Osteosarcoma
SRR5836967-SRR5836968	chr34	11265116	11265116	T	TG	CLPTM1L	Splice_Site						splicing	CLPTM1L	ENSCAFT00000017076.4:exon3:c.453+2T>TG			PRJNA391455	Osteosarcoma
SRR5836976-SRR5836975	chr12	8001013	8001013	G	C	GLP1R	Splice_Site					SNP	splicing	GLP1R	ENSCAFT00000002418.4:exon2:c.205+1G>C			PRJNA391455	Osteosarcoma
SRR5836987-SRR5836988	chr1	13250210	13250210	C	A	SERPINB10	Splice_Site					SNP	splicing	SERPINB10	ENSCAFT00000000080.3:exon3:c.234+1G>T			PRJNA391455	Osteosarcoma
SRR5836987-SRR5836988	chr1	106753969	106753969	G	T	AP2A1	Splice_Site					SNP	splicing	AP2A1	ENSCAFT00000087112.1:exon19:c.2444-1C>A;ENSCAFT00000088504.1:exon19:c.2444-1C>A;ENSCAFT00000005702.4:exon20:c.2414-1C>A;ENSCAFT00000073025.1:exon19:c.2444-1C>A;ENSCAFT00000043790.3:exon18:c.2378-1C>A			PRJNA391455	Osteosarcoma
SRR5836989-SRR5836990	chr12	418821	418821	C	T	PPP1R10	Splice_Site					SNP	splicing	PPP1R10	ENSCAFT00000000645.4:exon17:c.1958-1G>A			PRJNA391455	Osteosarcoma
SRR5836995-SRR5836996	chr25	14902828	14902828	G	T	MIPEP	Splice_Site					SNP	splicing	MIPEP	ENSCAFT00000011440.4:exon17:c.1696-1G>T			PRJNA391455	Osteosarcoma
SRR5837003-SRR5837004	chr35	24617163	24617163	T	G	PRSS16	Splice_Site					SNP	splicing	PRSS16	ENSCAFT00000017667.3:exon2:c.231+2T>G;ENSCAFT00000089329.1:exon2:c.231+2T>G			PRJNA391455	Osteosarcoma
SRR5837009-SRR5837010	chr25	20444574	20444574	T	C	NEK1	Splice_Site					SNP	splicing	NEK1	ENSCAFT00000073203.1:exon16:c.1189-2A>G;ENSCAFT00000012239.5:exon16:c.1189-2A>G;ENSCAFT00000048958.3:exon16:c.1189-2A>G;ENSCAFT00000073533.1:exon15:c.1129-2A>G;ENSCAFT00000081040.1:exon16:c.1189-2A>G;ENSCAFT00000077234.1:exon16:c.1189-2A>G;ENSCAFT00000060665.1:exon15:c.988-2A>G;ENSCAFT00000077934.1:exon16:c.1189-2A>G			PRJNA391455	Osteosarcoma
SRR5837009-SRR5837010	chr4	32445841	32445841	G	C	CDHR1	Splice_Site					SNP	splicing	CDHR1	ENSCAFT00000025218.4:exon6:c.696+1G>C			PRJNA391455	Osteosarcoma
SRR5837011-SRR5837012	chr20	41763079	41763079	T	C	SETD2	Splice_Site					SNP	splicing	SETD2	ENSCAFT00000077709.1:exon14:c.6287+2T>C;ENSCAFT00000021260.4:exon14:c.6287+2T>C;ENSCAFT00000071377.1:exon14:c.6287+2T>C;ENSCAFT00000089264.1:exon14:c.6287+2T>C;ENSCAFT00000072365.1:exon14:c.6287+2T>C;ENSCAFT00000064752.1:exon14:c.6287+2T>C;ENSCAFT00000060515.1:exon14:c.6287+2T>C			PRJNA391455	Osteosarcoma
SRR5837011-SRR5837012	chr5	32563091	32563091	C	T	TP53	Splice_Site					SNP	splicing	TP53	ENSCAFT00000026465.4:exon8:c.747-1G>A;ENSCAFT00000081814.1:exon8:c.939-1G>A;ENSCAFT00000086831.1:exon6:c.678-1G>A			PRJNA391455	Osteosarcoma
SRR5837011-SRR5837012	chr6	50077936	50077936	C	T	AGL	Splice_Site					SNP	splicing	AGL	ENSCAFT00000031896.3:exon17:c.2161-1G>A;ENSCAFT00000047455.3:exon16:c.2083-1G>A;ENSCAFT00000085859.1:exon17:c.2161-1G>A;ENSCAFT00000078100.1:exon15:c.1960-1G>A;ENSCAFT00000063103.1:exon16:c.1957-1G>A			PRJNA391455	Osteosarcoma
SRR5837018-SRR5837017	chr1	110870997	110870997	T	C	ZNF229	Splice_Site					SNP	splicing	ZNF229	ENSCAFT00000068444.1:exon1:c.117+2T>C			PRJNA391455	Osteosarcoma
SRR5837033-SRR5837034	chr12	44414906	44414906	C	G	CEP162	Splice_Site					SNP	splicing	CEP162	ENSCAFT00000004775.4:exon21:c.2767-1G>C;ENSCAFT00000081827.1:exon20:c.2596-1G>C;ENSCAFT00000077680.1:exon19:c.2566-1G>C;ENSCAFT00000083075.1:exon21:c.2710-1G>C;ENSCAFT00000086233.1:exon21:c.2767-1G>C;ENSCAFT00000075563.1:exon21:c.2710-1G>C			PRJNA391455	Osteosarcoma
SRR5837044-SRR5837043	chr16	26707401	26707401	A	C	TACC1	Splice_Site					SNP	splicing	TACC1	ENSCAFT00000009478.4:exon5:c.1412+2T>G;ENSCAFT00000059598.1:exon4:c.1982+2T>G			PRJNA391455	Osteosarcoma
SRR5837044-SRR5837043	chr25	3841176	3841176	A	T	SMAD9	Splice_Site					SNP	splicing	SMAD9	ENSCAFT00000009977.3:exon8:c.1267-2A>T;ENSCAFT00000009973.5:exon7:c.1156-2A>T;ENSCAFT00000077220.1:exon4:c.892-2A>T			PRJNA391455	Osteosarcoma
SRR8691707-SRR8691809	chr19	22888668	22888668	A	G	WDR33	Splice_Site					SNP	splicing	WDR33	ENSCAFT00000079405.1:exon16:c.1672-2A>G;ENSCAFT00000006945.4:exon16:c.1672-2A>G			PRJNA525883	Osteosarcoma
SRR8691707-SRR8691809	chr37	25571944	25571944	C	T	CFAP65	Splice_Site					SNP	splicing	CFAP65	ENSCAFT00000023817.4:exon27:c.4450-1G>A;ENSCAFT00000077251.1:exon27:c.4450-1G>A			PRJNA525883	Osteosarcoma
SRR8691707-SRR8691809	chr7	45107582	45107582	A	G	HAUS1	Splice_Site					SNP	splicing	HAUS1	ENSCAFT00000076102.1:exon4:c.476+2T>C;ENSCAFT00000065858.1:exon4:c.476+2T>C;ENSCAFT00000044021.3:exon4:c.476+2T>C;ENSCAFT00000027972.4:exon4:c.476+2T>C;ENSCAFT00000075158.1:exon4:c.476+2T>C			PRJNA525883	Osteosarcoma
SRR8691805-SRR8691808	chr5	51151989	51151989	G	C	OMA1	Splice_Site					SNP	splicing	OMA1	ENSCAFT00000030019.4:exon2:c.503+1G>C;ENSCAFT00000065254.1:exon2:c.500+1G>C;ENSCAFT00000081090.1:exon2:c.500+1G>C;ENSCAFT00000089126.1:exon2:c.500+1G>C			PRJNA525883	Osteosarcoma
SRR8691810-SRR8691763	chr5	32563797	32563797	C	A	TP53	Splice_Site					SNP	splicing	TP53	ENSCAFT00000026465.4:exon6:c.524-1G>T;ENSCAFT00000081814.1:exon6:c.716-1G>T;ENSCAFT00000086831.1:exon4:c.455-1G>T			PRJNA525883	Osteosarcoma
SRR8691821-SRR8691820	chr10	47913088	47913088	C	A	SRBD1	Splice_Site					SNP	splicing	SRBD1	ENSCAFT00000091858.1:exon5:c.836+1G>T;ENSCAFT00000049409.3:exon5:c.845+1G>T;ENSCAFT00000004029.4:exon5:c.845+1G>T;ENSCAFT00000079551.1:exon5:c.836+1G>T			PRJNA525883	Osteosarcoma
SRR8691828-SRR8691829	chr26	19021932	19021932	A	T	SGSM1	Splice_Site					SNP	splicing	SGSM1	ENSCAFT00000091035.1:exon12:c.1217-2A>T;ENSCAFT00000066898.1:exon12:c.1217-2A>T;ENSCAFT00000086509.1:exon11:c.1085-2A>T;ENSCAFT00000018292.3:exon13:c.1292-2A>T;ENSCAFT00000086078.1:exon13:c.1292-2A>T			PRJNA525883	Osteosarcoma

## Sheet: B-cell Lymphoma
Tumor_Sample_Barcode	Chromosome	Start_Position	End_Position	Reference_Allele	Tumor_Seq_Allele2	Hugo_Symbol	Variant_Classification	tx	exon	txChange	aaChange	Variant_Type	Func.refGene	Gene.refGene	GeneDetail.refGene	ExonicFunc.refGene	AAChange.refGene	Project	TumorType
SRR15461424-SRR15461471	chr13	37232448	37232448	T	C	MROH6	Splice_Site					SNP	splicing	MROH6	ENSCAFT00000080184.1:exon6:c.858-2A>G			PRJNA752630	B-cell Lymphoma
SRR15461425-SRR15461472	chr12	23833869	23833870	TA	T	DST	Splice_Site						splicing	DST	ENSCAFT00000065491.1:exon49:r.spl;ENSCAFT00000080810.1:exon49:r.spl;ENSCAFT00000043203.3:exon49:r.spl;ENSCAFT00000062154.1:exon48:r.spl;ENSCAFT00000084556.1:exon47:r.spl;ENSCAFT00000065669.1:exon49:r.spl;ENSCAFT00000060416.1:exon46:r.spl;ENSCAFT00000093931.1:exon46:r.spl;ENSCAFT00000003820.5:exon45:r.spl;ENSCAFT00000085899.1:exon46:r.spl			PRJNA752630	B-cell Lymphoma
SRR15461425-SRR15461472	chr25	48308416	48308416	A	G	LRRFIP1	Splice_Site					SNP	splicing	LRRFIP1	ENSCAFT00000062568.1:exon2:UTR5;ENSCAFT00000019565.4:exon2:c.67-2A>G;ENSCAFT00000067896.1:exon2:c.67-2A>G;ENSCAFT00000079927.1:exon2:c.67-2A>G;ENSCAFT00000089609.1:exon2:c.67-2A>G;ENSCAFT00000086249.1:exon2:c.67-2A>G;ENSCAFT00000080302.1:exon2:c.67-2A>G;ENSCAFT00000063380.1:exon2:c.67-2A>G;ENSCAFT00000073348.1:exon2:c.67-2A>G			PRJNA752630	B-cell Lymphoma
SRR15461426-SRR15461473	chr1	115875209	115875210	TG	T	ZNF829	Splice_Site						splicing	ZNF829	ENSCAFT00000049767.2:exon6:r.spl			PRJNA752630	B-cell Lymphoma
SRR15461426-SRR15461473	chr34	3942314	3942314	T	C	MARCHF6	Splice_Site					SNP	splicing	MARCHF6	ENSCAFT00000015984.5:exon2:c.96-2A>G;ENSCAFT00000060654.1:exon2:c.96-2A>G;ENSCAFT00000068776.1:exon2:c.96-2A>G			PRJNA752630	B-cell Lymphoma
SRR15461426-SRR15461473	chr9	26111014	26111014	T	A	PDK2	Splice_Site					SNP	splicing	PDK2	ENSCAFT00000026866.4:exon6:c.685+2T>A			PRJNA752630	B-cell Lymphoma
SRR15461427-SRR15461475	chr28	13033211	13033211	A	T	CWF19L1	Splice_Site					SNP	splicing	CWF19L1	ENSCAFT00000015294.4:exon1:c.23+2T>A			PRJNA752630	B-cell Lymphoma
SRR15461427-SRR15461475	chr3	51712602	51712602	G	A	MRPS11	Splice_Site					SNP	splicing	MRPS11	ENSCAFT00000018243.4:exon4:c.282-1G>A			PRJNA752630	B-cell Lymphoma
SRR15461428-SRR15461476	chr17	21331349	21331349	A	G	SNX17	Splice_Site					SNP	splicing	SNX17	ENSCAFT00000075111.1:exon13:c.1183-2A>G;ENSCAFT00000007887.4:exon12:c.1108-2A>G			PRJNA752630	B-cell Lymphoma
SRR15461428-SRR15461476	chr18	18271456	18271456	T	C	MAGI2	Splice_Site					SNP	splicing	MAGI2	ENSCAFT00000049514.3:exon7:c.615-2A>G;ENSCAFT00000080740.1:exon7:c.807-2A>G;ENSCAFT00000071443.1:exon7:c.615-2A>G;ENSCAFT00000007010.3:exon7:c.801-2A>G;ENSCAFT00000083195.1:exon7:UTR5;ENSCAFT00000086837.1:exon7:c.615-2A>G			PRJNA752630	B-cell Lymphoma
SRR15461428-SRR15461476	chr26	7310343	7310343	T	C	CFAP251	Splice_Site					SNP	splicing	CFAP251	ENSCAFT00000012807.4:exon20:c.3566-2A>G;ENSCAFT00000045305.3:exon17:c.3263-2A>G			PRJNA752630	B-cell Lymphoma
SRR15461428-SRR15461476	chr27	10582370	10582370	G	A	ADAMTS20	Splice_Site					SNP	splicing	ADAMTS20	ENSCAFT00000082023.1:exon20:c.2940+1G>A;ENSCAFT00000092502.1:exon20:c.2820+1G>A;ENSCAFT00000080681.1:exon19:c.2715+1G>A;ENSCAFT00000015482.4:exon20:c.2940+1G>A;ENSCAFT00000061804.1:exon20:c.2940+1G>A;ENSCAFT00000093152.1:exon20:c.2940+1G>A;ENSCAFT00000072553.1:exon20:c.2940+1G>A;ENSCAFT00000060004.1:exon20:c.2940+1G>A;ENSCAFT00000088482.1:exon18:c.2517+1G>A;ENSCAFT00000064237.1:exon20:c.2940+1G>A			PRJNA752630	B-cell Lymphoma
SRR15461428-SRR15461476	chr9	14812535	14812535	T	C	RGS9	Splice_Site					SNP	splicing	RGS9	ENSCAFT00000048731.3:exon18:c.1408-2A>G;ENSCAFT00000017738.3:exon18:c.1918-2A>G			PRJNA752630	B-cell Lymphoma
SRR15461429-SRR15461477	chr2	33939525	33939525	T	C	GTPBP4	Splice_Site					SNP	splicing	GTPBP4	ENSCAFT00000008921.4:exon15:c.1699-2A>G			PRJNA752630	B-cell Lymphoma
SRR15461429-SRR15461477	chr22	5206368	5206368	T	C	ZC3H13	Splice_Site					SNP	splicing	ZC3H13	ENSCAFT00000091574.1:exon17:c.4720+2T>C;ENSCAFT00000076784.1:exon17:c.4720+2T>C;ENSCAFT00000007276.4:exon16:c.4636+2T>C;ENSCAFT00000069032.1:exon15:c.4444+2T>C;ENSCAFT00000093466.1:exon15:c.2257+2T>C			PRJNA752630	B-cell Lymphoma
SRR15461429-SRR15461477	chr9	57782781	57782781	T	C	GAPVD1	Splice_Site					SNP	splicing	GAPVD1	ENSCAFT00000032151.5:exon10:c.1940-2A>G;ENSCAFT00000032150.4:exon9:c.1859-2A>G;ENSCAFT00000032152.5:exon9:c.1859-2A>G			PRJNA752630	B-cell Lymphoma
SRR15461431-SRR15461478	chr11	13242970	13242970	C	T	CEP120	Splice_Site					SNP	splicing	CEP120	ENSCAFT00000080854.1:exon5:c.358-1G>A;ENSCAFT00000079645.1:exon5:c.358-1G>A;ENSCAFT00000077435.1:exon4:c.322-1G>A;ENSCAFT00000068421.1:exon4:c.322-1G>A;ENSCAFT00000085315.1:exon4:c.322-1G>A;ENSCAFT00000000846.4:exon5:c.358-1G>A;ENSCAFT00000091767.1:exon5:c.358-1G>A			PRJNA752630	B-cell Lymphoma
SRR15461431-SRR15461478	chr32	4570360	4570360	G	T	CFAP299	Splice_Site					SNP	splicing	CFAP299	ENSCAFT00000048534.2:exon1:c.111+1G>T			PRJNA752630	B-cell Lymphoma
SRR15461432-SRR15461479	chr1	116781002	116781002	C	T	APLP1	Splice_Site					SNP	splicing	APLP1	ENSCAFT00000010774.5:exon2:c.721+1G>A;ENSCAFT00000010799.4:exon3:c.424+1G>A;ENSCAFT00000067538.1:exon2:c.721+1G>A;ENSCAFT00000081837.1:exon2:c.721+1G>A;ENSCAFT00000082154.1:exon2:c.721+1G>A;ENSCAFT00000063558.1:exon2:c.721+1G>A;ENSCAFT00000069276.1:exon2:c.721+1G>A;ENSCAFT00000043539.3:exon3:c.424+1G>A			PRJNA752630	B-cell Lymphoma
SRR15461432-SRR15461479	chr17	38730891	38730892	TA	T	KDM3A	Splice_Site						splicing	KDM3A	ENSCAFT00000012063.4:exon5:r.spl			PRJNA752630	B-cell Lymphoma
SRR15461432-SRR15461479	chr20	41799430	41799430	G	A	SETD2	Splice_Site					SNP	splicing	SETD2	ENSCAFT00000077709.1:exon20:c.7426-1G>A;ENSCAFT00000021260.4:exon20:c.7426-1G>A;ENSCAFT00000071377.1:exon19:c.7291-1G>A			PRJNA752630	B-cell Lymphoma
SRR15461433-SRR15461480	chr10	33484924	33484924	T	C	SLC41A2	Splice_Site					SNP	splicing	SLC41A2	ENSCAFT00000073252.1:exon11:c.1536+2T>C;ENSCAFT00000081603.1:exon11:c.1536+2T>C;ENSCAFT00000088220.1:exon11:c.1536+2T>C;ENSCAFT00000003053.4:exon9:c.1428+2T>C			PRJNA752630	B-cell Lymphoma
SRR15461433-SRR15461480	chr16	23952343	23952343	T	A	ANK1	Splice_Site					SNP	splicing	ANK1	ENSCAFT00000085848.1:exon40:c.5472+2T>A;ENSCAFT00000065035.1:exon41:c.5376+2T>A;ENSCAFT00000009193.4:exon40:c.5472+2T>A;ENSCAFT00000066468.1:exon40:c.5202+2T>A;ENSCAFT00000081490.1:exon40:c.5427+2T>A;ENSCAFT00000009199.5:exon39:c.5328+2T>A;ENSCAFT00000074184.1:exon42:c.5112+2T>A;ENSCAFT00000064068.1:exon39:c.5493+2T>A;ENSCAFT00000091913.1:exon38:c.5460+2T>A;ENSCAFT00000065479.1:exon38:c.5394+2T>A			PRJNA752630	B-cell Lymphoma
SRR15461433-SRR15461480	chr17	15304125	15304125	T	C	PUM2	Splice_Site					SNP	splicing	PUM2	ENSCAFT00000006180.5:exon8:c.1027-2A>G;ENSCAFT00000070674.1:exon9:c.1153-2A>G;ENSCAFT00000063222.1:exon9:c.1153-2A>G;ENSCAFT00000082137.1:exon9:c.1153-2A>G;ENSCAFT00000060818.1:exon9:c.1153-2A>G;ENSCAFT00000074891.1:exon9:c.1123-2A>G;ENSCAFT00000062093.1:exon10:c.1153-2A>G;ENSCAFT00000068985.1:exon9:c.1243-2A>G			PRJNA752630	B-cell Lymphoma
SRR15461433-SRR15461480	chr22	9042810	9042810	T	C	VWA8	Splice_Site					SNP	splicing	VWA8	ENSCAFT00000081198.1:exon35:c.4203+2T>C;ENSCAFT00000007673.4:exon34:c.4128+2T>C;ENSCAFT00000071416.1:exon33:c.4056+2T>C;ENSCAFT00000080167.1:exon35:c.4035+2T>C;ENSCAFT00000085866.1:exon34:c.3990+2T>C;ENSCAFT00000079933.1:exon31:c.3687+2T>C			PRJNA752630	B-cell Lymphoma
SRR15461433-SRR15461480	chr27	5100949	5100949	A	C	KCNH3	Splice_Site					SNP	splicing	KCNH3	ENSCAFT00000049004.3:exon1:c.24+2T>G;ENSCAFT00000013602.4:exon1:c.24+2T>G			PRJNA752630	B-cell Lymphoma
SRR15461433-SRR15461480	chr6	62065618	62065619	TA	T	COL24A1	Splice_Site						splicing	COL24A1	ENSCAFT00000035747.3:exon20:r.spl			PRJNA752630	B-cell Lymphoma
SRR15461434-SRR15461481	chr22	31135751	31135751	G	C	SCEL	Splice_Site					SNP	splicing	SCEL	ENSCAFT00000008343.4:exon24:c.1418+1G>C;ENSCAFT00000089057.1:exon23:c.1379+1G>C;ENSCAFT00000049415.3:exon23:c.1358+1G>C;ENSCAFT00000063111.1:exon23:c.1358+1G>C;ENSCAFT00000091066.1:exon24:c.1418+1G>C;ENSCAFT00000093302.1:exon22:c.1298+1G>C;ENSCAFT00000093825.1:exon22:c.1292+1G>C			PRJNA752630	B-cell Lymphoma
SRR15461434-SRR15461481	chr8	9997506	9997506	A	G	SCFD1	Splice_Site					SNP	splicing	SCFD1	ENSCAFT00000020208.5:exon10:c.753-2A>G			PRJNA752630	B-cell Lymphoma
SRR15461436-SRR15461483	chr10	22381250	22381250	A	G	TTLL12	Splice_Site					SNP	splicing	TTLL12	ENSCAFT00000083964.1:exon12:c.1656-2A>G;ENSCAFT00000089077.1:exon11:c.1608-2A>G;ENSCAFT00000075050.1:exon12:c.1656-2A>G;ENSCAFT00000093814.1:exon11:c.1608-2A>G;ENSCAFT00000001412.4:exon11:c.1608-2A>G			PRJNA752630	B-cell Lymphoma
SRR15461436-SRR15461483	chr34	11800318	11800318	A	G	EXOC3	Splice_Site					SNP	splicing	EXOC3	ENSCAFT00000017374.4:exon4:c.1164+2T>C			PRJNA752630	B-cell Lymphoma
SRR15461436-SRR15461483	chr4	58848381	58848381	A	G	CAMK2A	Splice_Site					SNP	splicing	CAMK2A	ENSCAFT00000074251.1:exon15:c.1018-2A>G;ENSCAFT00000028867.4:exon14:c.985-2A>G			PRJNA752630	B-cell Lymphoma
SRR15461439-SRR15461487	chr14	29400599	29400599	T	G	DGKB	Splice_Site					SNP	splicing	DGKB	ENSCAFT00000044090.3:exon11:c.916-2A>C;ENSCAFT00000070637.1:exon10:c.895-2A>C;ENSCAFT00000048249.2:exon11:c.916-2A>C;ENSCAFT00000075684.1:exon10:c.775-2A>C;ENSCAFT00000062558.1:exon10:c.895-2A>C;ENSCAFT00000081355.1:exon11:c.916-2A>C;ENSCAFT00000003770.5:exon10:c.895-2A>C;ENSCAFT00000081923.1:exon11:c.916-2A>C			PRJNA752630	B-cell Lymphoma
SRR15461439-SRR15461487	chr2	16012437	16012437	T	C	SVIL	Splice_Site					SNP	splicing	SVIL	ENSCAFT00000068021.1:exon35:c.5925-2A>G;ENSCAFT00000068049.1:exon34:c.5877-2A>G;ENSCAFT00000081004.1:exon34:c.5847-2A>G;ENSCAFT00000071232.1:exon34:c.5829-2A>G;ENSCAFT00000050150.3:exon33:c.5799-2A>G;ENSCAFT00000063087.1:exon30:c.4644-2A>G;ENSCAFT00000090380.1:exon31:c.5076-2A>G;ENSCAFT00000085062.1:exon31:c.5940-2A>G;ENSCAFT00000006428.4:exon31:c.5850-2A>G			PRJNA752630	B-cell Lymphoma
SRR15461439-SRR15461487	chr30	11281219	11281220	TA	T	SPG11	Splice_Site						splicing	SPG11	ENSCAFT00000021574.4:exon11:r.spl;ENSCAFT00000080544.1:exon11:r.spl;ENSCAFT00000084110.1:exon11:r.spl			PRJNA752630	B-cell Lymphoma
SRR15461442-SRR15461489	chr26	23177137	23177137	G	A	MTMR3	Splice_Site					SNP	splicing	MTMR3	ENSCAFT00000019762.4:exon16:c.1266+1G>A			PRJNA752630	B-cell Lymphoma
SRR15461442-SRR15461489	chr35	5112189	5112189	C	T	RPP40	Splice_Site					SNP	splicing	RPP40	ENSCAFT00000078953.1:exon7:c.1146-1G>A;ENSCAFT00000077302.1:exon6:c.690-1G>A;ENSCAFT00000060978.1:exon6:c.633-1G>A;ENSCAFT00000015009.4:exon7:c.678-1G>A			PRJNA752630	B-cell Lymphoma
SRR15461442-SRR15461489	chr5	73843157	73843157	T	C	ADAMTS18	Splice_Site					SNP	splicing	ADAMTS18	ENSCAFT00000031887.4:exon9:c.1521+2T>C			PRJNA752630	B-cell Lymphoma
SRR15461442-SRR15461489	chr9	47540250	47540250	T	C	ITGAE	Splice_Site					SNP	splicing	ITGAE	ENSCAFT00000030778.5:exon27:c.3052-2A>G			PRJNA752630	B-cell Lymphoma
SRR15461443-SRR15461490	chr18	53910025	53910025	A	G	TAF6L	Splice_Site					SNP	splicing	TAF6L	ENSCAFT00000024787.5:exon1:c.8+2T>C			PRJNA752630	B-cell Lymphoma
SRR15461443-SRR15461490	chr25	35016266	35016266	T	C	POLR3D	Splice_Site					SNP	splicing	POLR3D	ENSCAFT00000015035.4:exon2:UTR5;ENSCAFT00000060574.1:exon2:UTR5			PRJNA752630	B-cell Lymphoma
SRR15461443-SRR15461490	chr35	7830628	7830628	G	A	BMP6	Splice_Site					SNP	splicing	BMP6	ENSCAFT00000047626.2:exon5:c.747+1G>A			PRJNA752630	B-cell Lymphoma
SRR15461444-SRR15461491	chr2	76030767	76030767	T	C	TCEA3	Splice_Site					SNP	splicing	TCEA3	ENSCAFT00000021079.4:exon8:c.819+2T>C;ENSCAFT00000003983.5:exon8:c.819+2T>C;ENSCAFT00000060869.1:exon7:c.756+2T>C;ENSCAFT00000086438.1:exon7:c.756+2T>C			PRJNA752630	B-cell Lymphoma
SRR15461444-SRR15461491	chr33	29493762	29493762	T	A	UBXN7	Splice_Site					SNP	splicing	UBXN7	ENSCAFT00000020639.4:exon2:c.74-2A>T			PRJNA752630	B-cell Lymphoma
SRR15461445-SRR15461492	chr11	49742098	49742098	A	G	ACO1	Splice_Site					SNP	splicing	ACO1	ENSCAFT00000050196.2:exon13:c.1485-2A>G;ENSCAFT00000049973.3:exon13:c.1485-2A>G;ENSCAFT00000066864.1:exon13:c.1485-2A>G;ENSCAFT00000002821.5:exon12:c.1368-2A>G			PRJNA752630	B-cell Lymphoma
SRR15461445-SRR15461492	chr2	53522091	53522091	G	A	PIK3R1	Splice_Site					SNP	splicing	PIK3R1	ENSCAFT00000012216.4:exon13:c.1748+1G>A;ENSCAFT00000074878.1:exon12:c.1673+1G>A;ENSCAFT00000076972.1:exon7:c.845+1G>A;ENSCAFT00000068054.1:exon7:c.1034+1G>A;ENSCAFT00000061673.1:exon7:c.935+1G>A			PRJNA752630	B-cell Lymphoma
SRR15461445-SRR15461492	chr20	44858428	44858428	A	G	MAST3	Splice_Site					SNP	splicing	MAST3	ENSCAFT00000065544.1:exon8:c.765+2T>C;ENSCAFT00000023820.6:exon10:c.948+2T>C;ENSCAFT00000090026.1:exon7:c.858+2T>C;ENSCAFT00000023831.4:exon9:c.900+2T>C;ENSCAFT00000070066.1:exon8:c.1002+2T>C;ENSCAFT00000074897.1:exon7:c.981+2T>C			PRJNA752630	B-cell Lymphoma
SRR15461446-SRR15461493	chr16	40698068	40698068	C	T	MTMR7	Splice_Site					SNP	splicing	MTMR7	ENSCAFT00000067646.1:exon4:c.401-1G>A;ENSCAFT00000090532.1:exon4:c.305-1G>A;ENSCAFT00000011103.4:exon4:c.782-1G>A			PRJNA752630	B-cell Lymphoma
SRR15461446-SRR15461493	chr28	21918835	21918835	A	G	SMC3	Splice_Site					SNP	splicing	SMC3	ENSCAFT00000017137.4:exon19:c.1964-2A>G;ENSCAFT00000081582.1:exon18:c.1925-2A>G;ENSCAFT00000084519.1:exon17:c.1670-2A>G;ENSCAFT00000088877.1:exon19:c.1964-2A>G			PRJNA752630	B-cell Lymphoma
SRR15461446-SRR15461493	chr5	67016370	67016370	T	C	GSE1	Splice_Site					SNP	splicing	GSE1	ENSCAFT00000080444.1:exon8:c.1334-2A>G;ENSCAFT00000070493.1:exon8:c.1337-2A>G;ENSCAFT00000031711.4:exon8:c.1301-2A>G;ENSCAFT00000068529.1:exon7:c.1109-2A>G;ENSCAFT00000090868.1:exon7:c.1082-2A>G			PRJNA752630	B-cell Lymphoma
SRR15461446-SRR15461493	chr7	64213797	64213797	G	A	OSBPL1A	Splice_Site					SNP	splicing	OSBPL1A	ENSCAFT00000064783.1:exon23:c.2055-1G>A;ENSCAFT00000022395.4:exon24:c.2292-1G>A;ENSCAFT00000092009.1:exon22:c.2103-1G>A			PRJNA752630	B-cell Lymphoma
SRR15461446-SRR15461493	chr9	53436309	53436309	T	A	ASS1	Splice_Site					SNP	splicing	ASS1	ENSCAFT00000031736.4:exon14:c.977-2A>T;ENSCAFT00000082213.1:exon13:c.902-2A>T;ENSCAFT00000064012.1:exon12:c.908-2A>T			PRJNA752630	B-cell Lymphoma
SRR15461447-SRR15461494	chr20	39241469	39241469	C	T	RBM6	Splice_Site					SNP	splicing	RBM6	ENSCAFT00000017370.3:exon17:c.2941-1G>A			PRJNA752630	B-cell Lymphoma
SRR15461447-SRR15461494	chr25	32955479	32955479	C	T	ADAM7	Splice_Site					SNP	splicing	ADAM7	ENSCAFT00000078299.1:exon17:c.1242+1G>A;ENSCAFT00000014408.4:exon17:c.1929+1G>A;ENSCAFT00000084626.1:exon17:c.1929+1G>A			PRJNA752630	B-cell Lymphoma
SRR15461447-SRR15461494	chr27	4257674	4257674	C	A	LARP4	Splice_Site					SNP	splicing	LARP4	ENSCAFT00000013044.5:exon16:c.1828-1G>T;ENSCAFT00000013013.4:exon16:c.1828-1G>T;ENSCAFT00000065214.1:exon14:c.1603-1G>T;ENSCAFT00000088808.1:exon14:c.1603-1G>T			PRJNA752630	B-cell Lymphoma
SRR15461447-SRR15461494	chr28	36340790	36340790	A	G	DOCK1	Splice_Site					SNP	splicing	DOCK1	ENSCAFT00000074746.1:exon39:c.3675-2A>G;ENSCAFT00000020816.4:exon37:c.3738-2A>G;ENSCAFT00000020801.5:exon35:c.3576-2A>G			PRJNA752630	B-cell Lymphoma
SRR15461447-SRR15461494	chr8	70778543	70778544	AG	A	TRAF3	Splice_Site						splicing	TRAF3	ENSCAFT00000028719.4:exon8:r.spl;ENSCAFT00000086511.1:exon7:r.spl			PRJNA752630	B-cell Lymphoma
SRR15461448-SRR15461495	chr17	52151326	52151326	T	C	TRIM33	Splice_Site					SNP	splicing	TRIM33	ENSCAFT00000064204.1:exon6:c.834-2A>G;ENSCAFT00000015037.4:exon6:c.834-2A>G			PRJNA752630	B-cell Lymphoma
SRR15461448-SRR15461495	chr18	42844119	42844119	A	G	ATG13	Splice_Site					SNP	splicing	ATG13	ENSCAFT00000037591.3:exon12:c.888+2T>C			PRJNA752630	B-cell Lymphoma
SRR15461449-SRR15461497	chr12	43521292	43521292	G	A	DOP1A	Splice_Site					SNP	splicing	DOP1A	ENSCAFT00000004651.4:exon4:c.491+1G>A;ENSCAFT00000075245.1:exon4:c.491+1G>A;ENSCAFT00000004654.5:exon4:c.491+1G>A			PRJNA752630	B-cell Lymphoma
SRR15461449-SRR15461497	chr20	40539013	40539013	G	A	COL7A1	Splice_Site					SNP	splicing	COL7A1	ENSCAFT00000087090.1:exon74:c.5968-1G>A;ENSCAFT00000071188.1:exon74:c.5968-1G>A;ENSCAFT00000080754.1:exon74:c.5968-1G>A;ENSCAFT00000019781.4:exon74:c.5968-1G>A			PRJNA752630	B-cell Lymphoma
SRR15461449-SRR15461497	chr27	10555816	10555816	A	G	ADAMTS20	Splice_Site					SNP	splicing	ADAMTS20	ENSCAFT00000082023.1:exon10:c.1380-2A>G;ENSCAFT00000092502.1:exon10:c.1380-2A>G;ENSCAFT00000080681.1:exon10:c.1380-2A>G;ENSCAFT00000015482.4:exon10:c.1380-2A>G;ENSCAFT00000061804.1:exon10:c.1380-2A>G;ENSCAFT00000093152.1:exon10:c.1380-2A>G;ENSCAFT00000072553.1:exon10:c.1380-2A>G;ENSCAFT00000060004.1:exon10:c.1380-2A>G;ENSCAFT00000088482.1:exon8:c.957-2A>G;ENSCAFT00000064237.1:exon10:c.1380-2A>G			PRJNA752630	B-cell Lymphoma
SRR15461449-SRR15461497	chr28	34973021	34973021	A	G	UROS	Splice_Site					SNP	splicing	UROS	ENSCAFT00000075786.1:exon2:c.63+2T>C;ENSCAFT00000020409.3:exon2:c.63+2T>C;ENSCAFT00000061099.1:exon2:c.63+2T>C;ENSCAFT00000065116.1:exon2:c.63+2T>C			PRJNA752630	B-cell Lymphoma
SRR15461449-SRR15461497	chr3	54516305	54516305	T	C	AP3B2	Splice_Site					SNP	splicing	AP3B2	ENSCAFT00000020838.4:exon17:c.2101-2A>G			PRJNA752630	B-cell Lymphoma
SRR15461451-SRR15461499	chr11	5726260	5726260	A	G	LVRN	Splice_Site					SNP	splicing	LVRN	ENSCAFT00000091759.1:exon11:c.1827-2A>G;ENSCAFT00000066525.1:exon11:c.1827-2A>G;ENSCAFT00000000321.4:exon11:c.1827-2A>G			PRJNA752630	B-cell Lymphoma
SRR15461451-SRR15461499	chr20	21864703	21864703	G	T	MITF	Splice_Site					SNP	splicing	MITF	ENSCAFT00000092739.1:exon9:c.1053-1G>T;ENSCAFT00000074962.1:exon10:c.978-1G>T;ENSCAFT00000047433.3:exon9:c.984-1G>T;ENSCAFT00000010493.3:exon8:c.711-1G>T			PRJNA752630	B-cell Lymphoma
SRR15461451-SRR15461499	chr20	46119749	46119749	T	C	EPS15L1	Splice_Site					SNP	splicing	EPS15L1	ENSCAFT00000088436.1:exon11:c.1248+2T>C;ENSCAFT00000077067.1:exon14:c.1428+2T>C;ENSCAFT00000024934.4:exon14:c.1428+2T>C;ENSCAFT00000048895.3:exon13:c.1365+2T>C;ENSCAFT00000073170.1:exon14:c.1428+2T>C;ENSCAFT00000070557.1:exon14:c.1428+2T>C;ENSCAFT00000079710.1:exon14:c.1428+2T>C;ENSCAFT00000093419.1:exon14:c.1428+2T>C;ENSCAFT00000075434.1:exon13:c.1386+2T>C;ENSCAFT00000079428.1:exon12:c.1287+2T>C			PRJNA752630	B-cell Lymphoma
SRR15461451-SRR15461499	chr20	50897873	50897873	A	G	DNMT1	Splice_Site					SNP	splicing	DNMT1	ENSCAFT00000028398.4:exon8:c.634-2A>G			PRJNA752630	B-cell Lymphoma
SRR15461454-SRR15461501	chr17	60293899	60293899	G	A	PIP5K1A	Splice_Site					SNP	splicing	PIP5K1A	ENSCAFT00000068254.1:exon14:c.1599-1G>A;ENSCAFT00000090064.1:exon13:c.1515-1G>A;ENSCAFT00000062293.1:exon13:c.1452-1G>A;ENSCAFT00000019927.4:exon15:c.1638-1G>A			PRJNA752630	B-cell Lymphoma
SRR15461454-SRR15461501	chr20	28800404	28800404	C	T	PTPRG	Splice_Site					SNP	splicing	PTPRG	ENSCAFT00000070266.1:exon24:c.3469-1G>A;ENSCAFT00000086430.1:exon23:c.3382-1G>A;ENSCAFT00000079144.1:exon23:c.3385-1G>A;ENSCAFT00000011505.6:exon23:c.3181-1G>A;ENSCAFT00000011507.5:exon22:c.3094-1G>A;ENSCAFT00000090581.1:exon19:c.2845-1G>A			PRJNA752630	B-cell Lymphoma
SRR15461455-SRR15461502	chr14	35614876	35614876	A	C	DNAH11	Splice_Site					SNP	splicing	DNAH11	ENSCAFT00000004311.4:exon44:c.6993-2A>C			PRJNA752630	B-cell Lymphoma
SRR15461456-SRR15461503	chr12	67127705	67127705	T	C	SLC22A16	Splice_Site					SNP	splicing	SLC22A16	ENSCAFT00000006257.5:exon2:c.573-2A>G;ENSCAFT00000006259.4:exon3:c.387-2A>G;ENSCAFT00000082383.1:exon3:c.405-2A>G			PRJNA752630	B-cell Lymphoma
SRR15461456-SRR15461503	chr37	6937463	6937463	C	T	SF3B1	Splice_Site					SNP	splicing	SF3B1	ENSCAFT00000017219.4:exon10:c.1614+1G>A;ENSCAFT00000065169.1:exon8:c.1245+1G>A;ENSCAFT00000060319.1:exon9:c.1239+1G>A;ENSCAFT00000073927.1:exon9:c.1239+1G>A;ENSCAFT00000087622.1:exon9:c.1239+1G>A			PRJNA752630	B-cell Lymphoma
SRR15461457-SRR15461504	chr14	7757727	7757727	A	G	KCP	Splice_Site					SNP	splicing	KCP	ENSCAFT00000078286.1:exon6:c.602-2A>G;ENSCAFT00000082148.1:exon6:c.602-2A>G;ENSCAFT00000064041.1:exon4:c.332-2A>G;ENSCAFT00000002537.4:exon6:c.536-2A>G			PRJNA752630	B-cell Lymphoma
SRR15461457-SRR15461504	chr17	35650498	35650498	A	AG	BCL2L11	Splice_Site						splicing	BCL2L11	ENSCAFT00000078148.1:exon4:c.698-2A>AG;ENSCAFT00000045409.2:exon3:c.383-2A>AG;ENSCAFT00000059636.1:exon3:c.383-2A>AG;ENSCAFT00000091416.1:exon3:c.125-2A>AG			PRJNA752630	B-cell Lymphoma
SRR15461458-SRR15461505	chr1	85747267	85747267	A	G	C1H9orf85	Splice_Site					SNP	splicing	C1H9orf85	ENSCAFT00000002861.4:exon3:c.323+2T>C			PRJNA752630	B-cell Lymphoma
SRR15461458-SRR15461505	chr15	14739471	14739471	T	C	CCDC17	Splice_Site					SNP	splicing	CCDC17	ENSCAFT00000007232.4:exon9:c.1236+2T>C			PRJNA752630	B-cell Lymphoma
SRR15461459-SRR15461506	chr10	1827977	1827978	TG	T	CYP27B1	Splice_Site						splicing	CYP27B1	ENSCAFT00000000446.5:exon5:r.spl			PRJNA752630	B-cell Lymphoma
SRR15461459-SRR15461506	chr10	19502356	19502356	A	G	TBC1D22A	Splice_Site					SNP	splicing	TBC1D22A	ENSCAFT00000001151.4:exon4:c.637+2T>C;ENSCAFT00000089868.1:exon3:c.580+2T>C;ENSCAFT00000076036.1:exon4:c.544+2T>C;ENSCAFT00000075100.1:exon4:c.637+2T>C;ENSCAFT00000084409.1:exon4:c.637+2T>C;ENSCAFT00000070444.1:exon4:c.637+2T>C			PRJNA752630	B-cell Lymphoma
SRR15461459-SRR15461506	chr2	75032294	75032294	A	C	SRRM1	Splice_Site					SNP	splicing	SRRM1	ENSCAFT00000020529.4:exon10:c.1381+2T>G;ENSCAFT00000049148.2:exon10:c.1396+2T>G			PRJNA752630	B-cell Lymphoma
SRR15461461-SRR15461430	chr23	38207033	38207033	T	TA	ATR	Splice_Site						splicing	ATR	ENSCAFT00000093038.1:exon12:c.2502-2A>TA;ENSCAFT00000090937.1:exon12:c.2502-2A>TA;ENSCAFT00000012571.4:exon13:c.2643-2A>TA;ENSCAFT00000049875.3:exon13:c.2631-2A>TA;ENSCAFT00000060917.1:exon13:c.2631-2A>TA;ENSCAFT00000090885.1:exon12:c.2439-2A>TA			PRJNA752630	B-cell Lymphoma
SRR15461461-SRR15461430	chr27	6626847	6626847	C	T	PFKM	Splice_Site					SNP	splicing	PFKM	ENSCAFT00000014356.4:exon15:c.1410+1G>A			PRJNA752630	B-cell Lymphoma
SRR15461461-SRR15461430	chr5	31765464	31765464	T	C	PLD2	Splice_Site					SNP	splicing	PLD2	ENSCAFT00000025112.4:exon7:c.618-2A>G			PRJNA752630	B-cell Lymphoma
SRR15461462-SRR15461441	chr26	2946601	2946601	A	G	TMEM132C	Splice_Site					SNP	splicing	TMEM132C	ENSCAFT00000011016.4:exon4:c.1266+2T>C			PRJNA752630	B-cell Lymphoma
SRR15461462-SRR15461441	chr3	37514789	37514789	G	C	OTUD7A	Splice_Site					SNP	splicing	OTUD7A	ENSCAFT00000079819.1:exon9:c.958+1G>C;ENSCAFT00000016317.6:exon9:c.958+1G>C			PRJNA752630	B-cell Lymphoma
SRR15461464-SRR15461452	chr7	41880993	41880993	G	A	KHDC4	Splice_Site					SNP	splicing	KHDC4	ENSCAFT00000093093.1:exon4:c.614+1G>A;ENSCAFT00000026761.5:exon4:c.464+1G>A;ENSCAFT00000063639.1:exon4:c.464+1G>A			PRJNA752630	B-cell Lymphoma
SRR15461465-SRR15461463	chr1	110816791	110816791	G	T	CEACAM20	Splice_Site					SNP	splicing	CEACAM20	ENSCAFT00000047731.3:exon6:c.905-1G>T;ENSCAFT00000036986.3:exon6:c.1040-1G>T			PRJNA752630	B-cell Lymphoma
SRR15461465-SRR15461463	chr15	17724457	17724457	T	C	TEP1	Splice_Site					SNP	splicing	TEP1	ENSCAFT00000070081.1:exon38:c.5746-2A>G;ENSCAFT00000008693.4:exon39:c.5656-2A>G;ENSCAFT00000079783.1:exon40:c.5623-2A>G;ENSCAFT00000071323.1:exon38:c.5578-2A>G;ENSCAFT00000070203.1:exon38:c.5542-2A>G;ENSCAFT00000091379.1:exon38:c.5494-2A>G;ENSCAFT00000088190.1:exon37:c.5371-2A>G;ENSCAFT00000093961.1:exon37:c.5128-2A>G			PRJNA752630	B-cell Lymphoma
SRR15461465-SRR15461463	chr28	9945397	9945397	T	TA	TM9SF3	Splice_Site						splicing	TM9SF3	ENSCAFT00000068806.1:exon5:c.520-2A>TA;ENSCAFT00000013978.5:exon5:c.577-2A>TA			PRJNA752630	B-cell Lymphoma
SRR15461465-SRR15461463	chr5	8957094	8957094	C	A	EI24	Splice_Site					SNP	splicing	EI24	ENSCAFT00000069661.1:exon4:c.249+1G>T;ENSCAFT00000017324.4:exon3:c.249+1G>T			PRJNA752630	B-cell Lymphoma
SRR15461465-SRR15461463	chr8	17354145	17354145	T	TGAGA	PNN	Splice_Site						splicing	PNN	ENSCAFT00000022021.4:exon1:c.113+2T>TGAGA;ENSCAFT00000081849.1:exon1:c.113+2T>TGAGA			PRJNA752630	B-cell Lymphoma
SRR15461466-SRR15461474	chr15	50281777	50281777	C	T	FBXW7	Splice_Site					SNP	splicing	FBXW7	ENSCAFT00000012962.5:exon1:c.642+1G>A;ENSCAFT00000082966.1:exon2:c.1704+1G>A			PRJNA752630	B-cell Lymphoma
SRR15461466-SRR15461474	chr18	54982753	54982753	T	C	SDHAF2	Splice_Site					SNP	splicing	SDHAF2	ENSCAFT00000046459.2:exon2:c.850-2A>G;ENSCAFT00000063257.1:exon2:c.37-2A>G			PRJNA752630	B-cell Lymphoma
SRR15461466-SRR15461474	chr4	75086441	75086441	G	GGC	ZFR	Splice_Site						splicing	ZFR	ENSCAFT00000068647.1:exon14:c.2140-1G>GGC;ENSCAFT00000073936.1:exon12:c.2029-1G>GGC;ENSCAFT00000029995.5:exon12:c.2029-1G>GGC;ENSCAFT00000049882.3:exon12:c.2023-1G>GGC;ENSCAFT00000090910.1:exon12:c.1867-1G>GGC			PRJNA752630	B-cell Lymphoma
SRR15461466-SRR15461474	chr9	37960957	37960957	A	G	AP2B1	Splice_Site					SNP	splicing	AP2B1	ENSCAFT00000069402.1:exon20:c.2560+2T>C;ENSCAFT00000028998.4:exon19:c.2539+2T>C;ENSCAFT00000072392.1:exon19:c.2518+2T>C;ENSCAFT00000073748.1:exon18:c.2440+2T>C;ENSCAFT00000068206.1:exon20:c.2560+2T>C			PRJNA752630	B-cell Lymphoma
SRR15461467-SRR15461485	chr20	41778566	41778566	A	G	SETD2	Splice_Site					SNP	splicing	SETD2	ENSCAFT00000077709.1:exon17:c.7093-2A>G;ENSCAFT00000021260.4:exon17:c.7093-2A>G;ENSCAFT00000071377.1:exon16:c.6958-2A>G;ENSCAFT00000089264.1:exon17:c.7093-2A>G;ENSCAFT00000072365.1:exon17:c.7093-2A>G;ENSCAFT00000064752.1:exon17:c.7093-2A>G;ENSCAFT00000060515.1:exon17:c.7093-2A>G			PRJNA752630	B-cell Lymphoma
SRR15461467-SRR15461485	chr20	57006578	57006578	A	C	BTBD2	Splice_Site					SNP	splicing	BTBD2	ENSCAFT00000030891.4:exon5:c.494-2A>C			PRJNA752630	B-cell Lymphoma
SRR15461467-SRR15461485	chr28	9945397	9945398	TA	T	TM9SF3	Splice_Site						splicing	TM9SF3	ENSCAFT00000068806.1:exon5:r.spl;ENSCAFT00000013978.5:exon5:r.spl			PRJNA752630	B-cell Lymphoma
SRR15461467-SRR15461485	chr5	32563876	32563876	A	G	TP53	Splice_Site					SNP	splicing	TP53	ENSCAFT00000026465.4:exon5:c.523+2T>C;ENSCAFT00000081814.1:exon5:c.715+2T>C;ENSCAFT00000086831.1:exon3:c.454+2T>C			PRJNA752630	B-cell Lymphoma
SRR15461467-SRR15461485	chr6	31780804	31780804	C	T	CIITA	Splice_Site					SNP	splicing	CIITA	ENSCAFT00000090893.1:exon14:c.3153-1G>A;ENSCAFT00000073438.1:exon13:c.3108-1G>A;ENSCAFT00000030075.5:exon15:c.2982-1G>A;ENSCAFT00000076376.1:exon15:c.3198-1G>A;ENSCAFT00000070742.1:exon14:c.3135-1G>A;ENSCAFT00000030069.4:exon15:c.2964-1G>A;ENSCAFT00000073013.1:exon15:c.2892-1G>A;ENSCAFT00000093593.1:exon12:c.3126-1G>A;ENSCAFT00000061328.1:exon11:c.2967-1G>A			PRJNA752630	B-cell Lymphoma
SRR15461468-SRR15461496	chr10	35389567	35389567	T	C	GCC2	Splice_Site					SNP	splicing	GCC2	ENSCAFT00000067193.1:exon20:c.4607-2A>G;ENSCAFT00000078150.1:exon21:c.4652-2A>G;ENSCAFT00000003208.4:exon20:c.4607-2A>G;ENSCAFT00000062214.1:exon19:c.4502-2A>G;ENSCAFT00000092765.1:exon19:c.4430-2A>G;ENSCAFT00000092452.1:exon19:c.4208-2A>G			PRJNA752630	B-cell Lymphoma
SRR15461468-SRR15461496	chr30	17267543	17267543	T	TA	DMXL2	Splice_Site						splicing	DMXL2	ENSCAFT00000024538.5:exon6:c.501-2A>TA;ENSCAFT00000024526.4:exon6:c.501-2A>TA;ENSCAFT00000080233.1:exon6:c.501-2A>TA;ENSCAFT00000082312.1:exon6:c.501-2A>TA;ENSCAFT00000078223.1:exon6:c.501-2A>TA			PRJNA752630	B-cell Lymphoma
SRR15461468-SRR15461496	chr5	76790261	76790261	T	C	HYDIN	Splice_Site					SNP	splicing	HYDIN	ENSCAFT00000032120.4:exon67:c.11439-2A>G			PRJNA752630	B-cell Lymphoma
SRR15461468-SRR15461496	chr7	55161814	55161814	C	T	DTNA	Splice_Site					SNP	splicing	DTNA	ENSCAFT00000028525.5:exon5:c.362+1G>A;ENSCAFT00000028522.4:exon5:c.362+1G>A;ENSCAFT00000066586.1:exon5:c.362+1G>A;ENSCAFT00000084326.1:exon5:c.362+1G>A;ENSCAFT00000065208.1:exon5:c.362+1G>A;ENSCAFT00000077755.1:exon5:c.362+1G>A;ENSCAFT00000065610.1:exon5:c.362+1G>A;ENSCAFT00000076537.1:exon5:c.362+1G>A;ENSCAFT00000062226.1:exon5:c.362+1G>A			PRJNA752630	B-cell Lymphoma
SRR15461469-SRR15461507	chr14	8533150	8533150	T	C	SND1	Splice_Site					SNP	splicing	SND1	ENSCAFT00000002687.4:exon12:c.1408-2A>G;ENSCAFT00000074664.1:exon9:c.982-2A>G;ENSCAFT00000092581.1:exon9:c.967-2A>G;ENSCAFT00000085190.1:exon11:c.1153-2A>G;ENSCAFT00000073666.1:exon9:c.955-2A>G;ENSCAFT00000078966.1:exon11:c.1153-2A>G			PRJNA752630	B-cell Lymphoma
SRR15461469-SRR15461507	chr20	50138360	50138360	T	C	LDLR	Splice_Site					SNP	splicing	LDLR	ENSCAFT00000046113.3:exon2:c.338-2A>G;ENSCAFT00000027791.4:exon4:c.314-2A>G;ENSCAFT00000086039.1:exon4:c.314-2A>G;ENSCAFT00000089638.1:exon2:c.338-2A>G			PRJNA752630	B-cell Lymphoma
SRR15461469-SRR15461507	chr38	23723382	23723382	T	A	DISP1	Splice_Site					SNP	splicing	DISP1	ENSCAFT00000065781.1:exon6:c.1250-2A>T;ENSCAFT00000018051.4:exon8:c.881-2A>T;ENSCAFT00000049302.3:exon5:c.1220-2A>T;ENSCAFT00000072055.1:exon7:c.857-2A>T;ENSCAFT00000087527.1:exon6:c.1250-2A>T			PRJNA752630	B-cell Lymphoma
SRR15461469-SRR15461507	chr5	31848281	31848281	T	C	PELP1	Splice_Site					SNP	splicing	PELP1	ENSCAFT00000025217.4:exon3:c.420+2T>C;ENSCAFT00000074964.1:exon3:UTR5			PRJNA752630	B-cell Lymphoma
SRR15461470-SRR15461508	chr10	32396001	32396001	A	G	CKAP4	Splice_Site					SNP	splicing	CKAP4	ENSCAFT00000002969.5:exon2:c.469-2A>G			PRJNA752630	B-cell Lymphoma
SRR15508608-SRR15464832	chr12	17573668	17573668	C	T	CRISP2	Splice_Site					SNP	splicing	CRISP2	ENSCAFT00000086374.1:exon7:c.719+1G>A;ENSCAFT00000068178.1:exon7:c.719+1G>A			PRJNA752630	B-cell Lymphoma
SRR15508608-SRR15464832	chr25	33053569	33053569	C	A	ADAMDEC1	Splice_Site					SNP	splicing	ADAMDEC1	ENSCAFT00000014421.5:exon9:c.760-1G>T			PRJNA752630	B-cell Lymphoma
SRR15508609-SRR15464833	chr1	44932792	44932792	A	G	TIAM2	Splice_Site					SNP	splicing	TIAM2	ENSCAFT00000085282.1:exon9:c.2170-2A>G;ENSCAFT00000000892.4:exon9:c.298-2A>G			PRJNA752630	B-cell Lymphoma
SRR15508609-SRR15464833	chr11	17209938	17209938	G	T	SLC12A2	Splice_Site					SNP	splicing	SLC12A2	ENSCAFT00000000989.5:exon12:c.1723+1G>T;ENSCAFT00000090231.1:exon12:c.1723+1G>T;ENSCAFT00000090606.1:exon12:c.1723+1G>T			PRJNA752630	B-cell Lymphoma
SRR15508609-SRR15464833	chr16	18082460	18082460	C	A	PAXIP1	Splice_Site					SNP	splicing	PAXIP1	ENSCAFT00000008164.4:exon9:c.1888-1G>T;ENSCAFT00000070096.1:exon7:c.1780-1G>T;ENSCAFT00000068905.1:exon9:c.1609-1G>T			PRJNA752630	B-cell Lymphoma
SRR15508609-SRR15464833	chr2	84151070	84151070	C	T	TNFRSF1B	Splice_Site					SNP	splicing	TNFRSF1B	ENSCAFT00000026036.4:exon1:c.9+1G>A			PRJNA752630	B-cell Lymphoma
SRR15508609-SRR15464833	chr36	7366167	7366167	T	C	SLC4A10	Splice_Site					SNP	splicing	SLC4A10	ENSCAFT00000016408.4:exon20:c.2793+2T>C;ENSCAFT00000093460.1:exon19:c.2703+2T>C;ENSCAFT00000062661.1:exon20:c.2793+2T>C;ENSCAFT00000083313.1:exon20:c.2793+2T>C;ENSCAFT00000079574.1:exon20:c.2793+2T>C;ENSCAFT00000065632.1:exon20:c.2826+2T>C			PRJNA752630	B-cell Lymphoma
SRR15508609-SRR15464833	chr7	28616629	28616629	G	GA	KIFAP3	Splice_Site						splicing	KIFAP3	ENSCAFT00000023932.4:exon4:c.320-1G>GA;ENSCAFT00000072650.1:exon3:c.188-1G>GA			PRJNA752630	B-cell Lymphoma
SRR15508609-SRR15464833	chr9	15951845	15951845	G	A	MAP2K6	Splice_Site					SNP	splicing	MAP2K6	ENSCAFT00000017124.4:exon12:c.928-1G>A;ENSCAFT00000084605.1:exon11:c.934-1G>A			PRJNA752630	B-cell Lymphoma
SRR15508610-SRR15464834	chr12	48894931	48894931	C	T	MDN1	Splice_Site					SNP	splicing	MDN1	ENSCAFT00000004993.5:exon69:c.11448-1G>A;ENSCAFT00000048198.3:exon69:c.11448-1G>A;ENSCAFT00000072786.1:exon68:c.11286-1G>A;ENSCAFT00000077930.1:exon68:c.11250-1G>A;ENSCAFT00000091782.1:exon68:c.11250-1G>A			PRJNA752630	B-cell Lymphoma
SRR15508610-SRR15464834	chr14	23069647	23069648	TA	T	COL28A1	Splice_Site						splicing	COL28A1	ENSCAFT00000044570.2:exon22:r.spl;ENSCAFT00000090139.1:exon21:r.spl;ENSCAFT00000069511.1:exon22:r.spl;ENSCAFT00000084205.1:exon20:r.spl			PRJNA752630	B-cell Lymphoma
SRR15508610-SRR15464834	chr19	29995758	29995758	A	G	EPB41L5	Splice_Site					SNP	splicing	EPB41L5	ENSCAFT00000068480.1:exon14:c.1178+2T>C;ENSCAFT00000007825.4:exon14:c.1178+2T>C;ENSCAFT00000092758.1:exon14:c.1178+2T>C;ENSCAFT00000066835.1:exon14:c.1178+2T>C;ENSCAFT00000076523.1:exon12:c.1073+2T>C;ENSCAFT00000046341.2:exon14:c.1178+2T>C;ENSCAFT00000049397.2:exon14:c.1178+2T>C			PRJNA752630	B-cell Lymphoma
SRR15508610-SRR15464834	chr3	40077013	40077013	C	T	LRRK1	Splice_Site					SNP	splicing	LRRK1	ENSCAFT00000035359.4:exon3:c.433+1G>A;ENSCAFT00000079594.1:exon3:c.385+1G>A;ENSCAFT00000016843.4:exon3:c.364+1G>A;ENSCAFT00000063546.1:exon3:c.325+1G>A			PRJNA752630	B-cell Lymphoma
SRR15508610-SRR15464834	chr9	48091914	48091915	TA	T	EHMT1	Splice_Site						splicing	EHMT1	ENSCAFT00000030827.4:exon5:r.spl;ENSCAFT00000093930.1:exon5:r.spl			PRJNA752630	B-cell Lymphoma
SRR15508611-SRR15464835	chr20	37780477	37780477	A	G	RRP9	Splice_Site					SNP	splicing	RRP9	ENSCAFT00000015997.4:exon5:c.349-2A>G			PRJNA752630	B-cell Lymphoma
SRR15508612-SRR15464836	chr2	85405173	85405173	T	A	PGD	Splice_Site					SNP	splicing	PGD	ENSCAFT00000026597.4:exon3:c.256-2A>T			PRJNA752630	B-cell Lymphoma
SRR15508612-SRR15464836	chr20	50396948	50396948	G	A	TMED1	Splice_Site					SNP	splicing	TMED1	ENSCAFT00000027957.4:exon2:c.278+1G>A;ENSCAFT00000066253.1:exon2:c.281+1G>A			PRJNA752630	B-cell Lymphoma
SRR15508613-SRR15464837	chr10	24813987	24813987	C	T	TNRC6B	Splice_Site					SNP	splicing	TNRC6B	ENSCAFT00000082685.1:exon39:c.6721-1G>A;ENSCAFT00000001904.4:exon38:c.6550-1G>A;ENSCAFT00000045467.3:exon36:c.6472-1G>A			PRJNA752630	B-cell Lymphoma
SRR15508613-SRR15464837	chr3	31729039	31729039	T	C	HERC2	Splice_Site					SNP	splicing	HERC2	ENSCAFT00000015697.4:exon87:c.13558-2A>G;ENSCAFT00000068922.1:exon86:c.13459-2A>G;ENSCAFT00000081416.1:exon86:c.13444-2A>G;ENSCAFT00000079939.1:exon86:c.13420-2A>G;ENSCAFT00000060606.1:exon86:c.13126-2A>G;ENSCAFT00000090970.1:exon86:c.13372-2A>G;ENSCAFT00000070239.1:exon86:c.13357-2A>G;ENSCAFT00000093604.1:exon86:c.13030-2A>G;ENSCAFT00000086955.1:exon88:c.13330-2A>G			PRJNA752630	B-cell Lymphoma
SRR15508614-SRR15464838	chr10	28544382	28544382	A	G	APOL6	Splice_Site					SNP	splicing	APOL6	ENSCAFT00000088874.1:exon1:UTR5			PRJNA752630	B-cell Lymphoma
SRR15508614-SRR15464838	chr16	15979998	15979998	A	G	KMT2C	Splice_Site					SNP	splicing	KMT2C	ENSCAFT00000007959.6:exon47:c.11941+2T>C			PRJNA752630	B-cell Lymphoma
SRR15508614-SRR15464838	chr5	32632979	32632979	T	TG	DNAH2	Splice_Site						splicing	DNAH2	ENSCAFT00000026606.4:exon16:c.2442+2T>TG			PRJNA752630	B-cell Lymphoma
SRR15508614-SRR15464838	chr6	57171251	57171251	T	C	TGFBR3	Splice_Site					SNP	splicing	TGFBR3	ENSCAFT00000032134.4:exon7:c.737+2T>C;ENSCAFT00000085085.1:exon4:c.503+2T>C			PRJNA752630	B-cell Lymphoma
SRR15508614-SRR15464838	chr7	43194242	43194242	G	T	DENND4B	Splice_Site					SNP	splicing	DENND4B	ENSCAFT00000027606.5:exon20:c.2752-1G>T			PRJNA752630	B-cell Lymphoma
SRR15508616-SRR15464840	chr10	45288097	45288097	T	C	FER1L5	Splice_Site					SNP	splicing	FER1L5	ENSCAFT00000003791.5:exon8:c.790-2A>G			PRJNA752630	B-cell Lymphoma
SRR15508616-SRR15464840	chr2	7427394	7427395	TA	T	GAD2	Splice_Site						splicing	GAD2	ENSCAFT00000006929.3:exon8:r.spl			PRJNA752630	B-cell Lymphoma
SRR15508616-SRR15464840	chr20	56973052	56973052	A	G	MKNK2	Splice_Site					SNP	splicing	MKNK2	ENSCAFT00000030889.4:exon6:c.1179-2A>G;ENSCAFT00000030889.4:exon6:UTR3			PRJNA752630	B-cell Lymphoma
SRR15508616-SRR15464840	chr23	29476621	29476621	A	G	DNAJC13	Splice_Site					SNP	splicing	DNAJC13	ENSCAFT00000010177.4:exon39:c.4417-2A>G;ENSCAFT00000062323.1:exon38:c.4321-2A>G;ENSCAFT00000072719.1:exon39:c.4417-2A>G;ENSCAFT00000084285.1:exon38:c.4267-2A>G;ENSCAFT00000073623.1:exon39:c.4417-2A>G;ENSCAFT00000067046.1:exon40:c.4432-2A>G;ENSCAFT00000092438.1:exon40:c.4432-2A>G			PRJNA752630	B-cell Lymphoma
SRR15508617-SRR15464841	chr7	29171428	29171428	A	G	CCDC181	Splice_Site					SNP	splicing	CCDC181	ENSCAFT00000024185.4:exon4:c.1213-2A>G			PRJNA752630	B-cell Lymphoma
SRR15508619-SRR15464843	chr12	1391599	1391599	G	A	C2	Splice_Site					SNP	splicing	C2	ENSCAFT00000081010.1:exon4:c.428-1G>A;ENSCAFT00000001072.5:exon5:c.536-1G>A;ENSCAFT00000070062.1:exon3:c.518-1G>A;ENSCAFT00000081727.1:exon3:c.518-1G>A			PRJNA752630	B-cell Lymphoma
SRR15508619-SRR15464843	chr12	58780071	58780071	T	C	ASCC3	Splice_Site					SNP	splicing	ASCC3	ENSCAFT00000005717.4:exon12:c.1903-2A>G;ENSCAFT00000074604.1:exon12:c.1309-2A>G			PRJNA752630	B-cell Lymphoma
SRR15508619-SRR15464843	chr12	63568079	63568079	T	G	ATG5	Splice_Site					SNP	splicing	ATG5	ENSCAFT00000005953.4:exon7:c.692-2A>C;ENSCAFT00000064531.1:exon6:c.458-2A>C			PRJNA752630	B-cell Lymphoma
SRR15508620-SRR15464844	chr11	64529102	64529102	A	G	PTPN3	Splice_Site					SNP	splicing	PTPN3	ENSCAFT00000063784.1:exon13:c.1205+2T>C;ENSCAFT00000065602.1:exon10:c.1028+2T>C;ENSCAFT00000091610.1:exon13:c.1229+2T>C;ENSCAFT00000088010.1:exon13:c.1229+2T>C;ENSCAFT00000004599.4:exon13:c.1136+2T>C;ENSCAFT00000082280.1:exon11:c.1184+2T>C;ENSCAFT00000082999.1:exon13:c.1136+2T>C			PRJNA752630	B-cell Lymphoma
SRR15508620-SRR15464844	chr11	73977135	73977135	A	G	C5	Splice_Site					SNP	splicing	C5	ENSCAFT00000005779.4:exon27:c.3486+2T>C			PRJNA752630	B-cell Lymphoma
SRR15508620-SRR15464844	chr27	17329600	17329600	G	GTA	DENND5B	Splice_Site						splicing	DENND5B	ENSCAFT00000072992.1:exon17:c.2789+1G>GTA;ENSCAFT00000062123.1:exon16:c.2705+1G>GTA;ENSCAFT00000049350.3:exon16:c.2678+1G>GTA;ENSCAFT00000063332.1:exon15:c.2318+1G>GTA;ENSCAFT00000016977.4:exon13:c.2498+1G>GTA			PRJNA752630	B-cell Lymphoma
SRR15508622-SRR15464846	chr13	43441568	43441568	G	T	ATP10D	Splice_Site					SNP	splicing	ATP10D	ENSCAFT00000003015.4:exon5:c.776+1G>T;ENSCAFT00000077061.1:exon5:c.956+1G>T			PRJNA752630	B-cell Lymphoma
SRR15508622-SRR15464846	chr9	4846170	4846170	A	G	ITGB4	Splice_Site					SNP	splicing	ITGB4	ENSCAFT00000046475.2:exon11:c.1215+2T>C;ENSCAFT00000007895.4:exon11:c.1215+2T>C			PRJNA752630	B-cell Lymphoma
SRR15508623-SRR15464847	chr1	62512806	62512806	T	C	TRDN	Splice_Site					SNP	splicing	TRDN	ENSCAFT00000001568.4:exon21:c.1304-2A>G;ENSCAFT00000001569.5:exon20:c.1280-2A>G;ENSCAFT00000001573.4:exon20:c.1280-2A>G			PRJNA752630	B-cell Lymphoma
SRR15508624-SRR15464848	chr2	6796338	6796339	TA	T	YME1L1	Splice_Site						splicing	YME1L1	ENSCAFT00000007090.4:exon10:r.spl;ENSCAFT00000045217.3:exon10:r.spl;ENSCAFT00000060116.1:exon10:r.spl;ENSCAFT00000079387.1:exon9:r.spl			PRJNA752630	B-cell Lymphoma
SRR15508624-SRR15464848	chr2	69002005	69002005	A	G	CCDC28B	Splice_Site					SNP	splicing	CCDC28B	ENSCAFT00000017032.4:exon2:c.331+2T>C			PRJNA752630	B-cell Lymphoma
SRR15508624-SRR15464848	chr4	12243054	12243054	T	C	ANK3	Splice_Site					SNP	splicing	ANK3	ENSCAFT00000063768.1:exon28:c.3159-2A>G;ENSCAFT00000076535.1:exon28:c.3120-2A>G;ENSCAFT00000068194.1:exon28:c.3108-2A>G			PRJNA752630	B-cell Lymphoma
SRR15508625-SRR15464849	chr37	25408041	25408041	A	G	PRKAG3	Splice_Site					SNP	splicing	PRKAG3	ENSCAFT00000023757.5:exon11:c.1194+2T>C;ENSCAFT00000090153.1:exon9:c.1212+2T>C;ENSCAFT00000007921.3:exon11:c.1530+2T>C;ENSCAFT00000060150.1:exon9:c.1212+2T>C			PRJNA752630	B-cell Lymphoma
SRR15508625-SRR15464849	chr5	12627373	12627373	C	T	SORL1	Splice_Site					SNP	splicing	SORL1	ENSCAFT00000047063.2:exon3:c.498+1G>A;ENSCAFT00000087705.1:exon3:c.498+1G>A;ENSCAFT00000018722.5:exon3:c.498+1G>A;ENSCAFT00000049040.3:exon3:c.498+1G>A;ENSCAFT00000093095.1:exon3:c.498+1G>A;ENSCAFT00000071665.1:exon3:c.498+1G>A;ENSCAFT00000066780.1:exon3:c.465+1G>A			PRJNA752630	B-cell Lymphoma
SRR15508627-SRR15464851	chr10	24090914	24090914	C	G	EP300	Splice_Site					SNP	splicing	EP300	ENSCAFT00000001723.6:exon20:c.3659+1G>C;ENSCAFT00000086120.1:exon21:c.3737+1G>C;ENSCAFT00000065648.1:exon20:c.3560+1G>C;ENSCAFT00000085148.1:exon20:c.3557+1G>C;ENSCAFT00000066651.1:exon20:c.3491+1G>C			PRJNA752630	B-cell Lymphoma
SRR15508627-SRR15464851	chr2	1996551	1996551	A	G	CUL2	Splice_Site					SNP	splicing	CUL2	ENSCAFT00000067036.1:exon22:c.2225-2A>G			PRJNA752630	B-cell Lymphoma
SRR15508627-SRR15464851	chr20	37755212	37755212	G	A	PCBP4	Splice_Site					SNP	splicing	PCBP4	ENSCAFT00000015946.4:exon2:UTR5;ENSCAFT00000092479.1:exon2:UTR5;ENSCAFT00000088545.1:exon2:UTR5			PRJNA752630	B-cell Lymphoma
SRR15508627-SRR15464851	chr3	19870442	19870442	A	G	MEF2C	Splice_Site					SNP	splicing	MEF2C	ENSCAFT00000013201.5:exon4:c.55-2A>G;ENSCAFT00000013212.5:exon4:c.55-2A>G;ENSCAFT00000074240.1:exon4:c.55-2A>G;ENSCAFT00000044684.2:exon4:c.55-2A>G			PRJNA752630	B-cell Lymphoma
SRR15508627-SRR15464851	chr30	35415372	35415372	T	C	MYO9A	Splice_Site					SNP	splicing	MYO9A	ENSCAFT00000027983.5:exon39:c.6954-2A>G;ENSCAFT00000067812.1:exon40:c.6873-2A>G;ENSCAFT00000083979.1:exon38:c.6897-2A>G;ENSCAFT00000063511.1:exon38:c.6834-2A>G;ENSCAFT00000047923.2:exon38:c.6741-2A>G			PRJNA752630	B-cell Lymphoma
SRR15508627-SRR15464851	chr9	26186273	26186273	C	T	COL1A1	Splice_Site					SNP	splicing	COL1A1	ENSCAFT00000026953.4:exon45:c.3357+1G>A;ENSCAFT00000084988.1:exon44:c.3303+1G>A			PRJNA752630	B-cell Lymphoma
SRR15508628-SRR15464852	chr2	7427394	7427395	TA	T	GAD2	Splice_Site						splicing	GAD2	ENSCAFT00000006929.3:exon8:r.spl			PRJNA752630	B-cell Lymphoma
SRR15508628-SRR15464852	chr20	28602966	28602969	TAAA	T	CADPS	Splice_Site						splicing	CADPS				PRJNA752630	B-cell Lymphoma
SRR15508628-SRR15464852	chr20	39394127	39394127	T	C	MST1R	Splice_Site					SNP	splicing	MST1R	ENSCAFT00000017469.4:exon8:c.2198+2T>C;ENSCAFT00000036013.4:exon7:c.2195+2T>C;ENSCAFT00000092407.1:exon7:c.2195+2T>C;ENSCAFT00000068294.1:exon5:c.1877+2T>C			PRJNA752630	B-cell Lymphoma
SRR15508628-SRR15464852	chr26	5912988	5912989	TA	T	ATP6V0A2	Splice_Site						splicing	ATP6V0A2	ENSCAFT00000011722.3:exon20:r.spl			PRJNA752630	B-cell Lymphoma
SRR15508628-SRR15464852	chr30	24143436	24143436	C	T	MYO1E	Splice_Site					SNP	splicing	MYO1E	ENSCAFT00000026368.4:exon9:c.778-1G>A;ENSCAFT00000069552.1:exon8:c.643-1G>A;ENSCAFT00000068956.1:exon9:c.778-1G>A			PRJNA752630	B-cell Lymphoma
SRR15508630-SRR15464854	chr14	13726711	13726713	TAA	T	ABCB1	Splice_Site						splicing	ABCB1				PRJNA752630	B-cell Lymphoma
SRR15508630-SRR15464854	chr15	26616315	26616315	A	AAAAT	TSPAN19	Splice_Site						splicing	TSPAN19	ENSCAFT00000063955.1:exon2:UTR5			PRJNA752630	B-cell Lymphoma
SRR15508630-SRR15464854	chr7	44386863	44386863	T	C	KATNAL2	Splice_Site					SNP	splicing	KATNAL2	ENSCAFT00000027875.5:exon13:c.1101-2A>G			PRJNA752630	B-cell Lymphoma
SRR15508631-SRR15464855	chr1	30625575	30625575	A	G	ARFGEF3	Splice_Site					SNP	splicing	ARFGEF3	ENSCAFT00000044681.3:exon22:c.4031-2A>G;ENSCAFT00000086635.1:exon21:c.3908-2A>G;ENSCAFT00000000423.4:exon20:c.3776-2A>G;ENSCAFT00000066773.1:exon20:c.3578-2A>G;ENSCAFT00000083086.1:exon20:c.3857-2A>G			PRJNA752630	B-cell Lymphoma
SRR15508631-SRR15464855	chr17	60737681	60737681	A	G	CELF3	Splice_Site					SNP	splicing	CELF3	ENSCAFT00000020318.4:exon8:c.922+2T>C			PRJNA752630	B-cell Lymphoma
SRR15508631-SRR15464855	chr2	79306913	79306913	A	T	CAPZB	Splice_Site					SNP	splicing	CAPZB	ENSCAFT00000091118.1:exon7:c.676-2A>T;ENSCAFT00000059581.1:exon7:c.676-2A>T;ENSCAFT00000064262.1:exon7:c.601-2A>T;ENSCAFT00000093862.1:exon7:c.613-2A>T;ENSCAFT00000024053.4:exon7:c.886-2A>T;ENSCAFT00000071971.1:exon7:c.886-2A>T;ENSCAFT00000080811.1:exon7:c.886-2A>T			PRJNA752630	B-cell Lymphoma
SRR15508631-SRR15464855	chr2	82135109	82135109	A	G	FHAD1	Splice_Site					SNP	splicing	FHAD1	ENSCAFT00000069039.1:exon26:c.3423+2T>C;ENSCAFT00000025881.5:exon26:c.3423+2T>C;ENSCAFT00000065408.1:exon25:c.3315+2T>C;ENSCAFT00000080398.1:exon25:c.3315+2T>C;ENSCAFT00000025883.4:exon26:c.3423+2T>C			PRJNA752630	B-cell Lymphoma
SRR15508631-SRR15464855	chr26	37884108	37884108	G	A	PTEN	Splice_Site					SNP	splicing	PTEN	ENSCAFT00000087317.1:exon7:c.253+1G>A;ENSCAFT00000024821.4:exon3:c.157+1G>A			PRJNA752630	B-cell Lymphoma
SRR15508631-SRR15464855	chr3	52696325	52696325	G	A	WDR93	Splice_Site					SNP	splicing	WDR93	ENSCAFT00000019063.4:exon3:c.558+1G>A;ENSCAFT00000072409.1:exon4:c.360+1G>A;ENSCAFT00000085461.1:exon3:c.558+1G>A			PRJNA752630	B-cell Lymphoma
SRR15508631-SRR15464855	chr36	30594204	30594204	C	T	COL5A2	Splice_Site					SNP	splicing	COL5A2	ENSCAFT00000081909.1:exon9:c.603+1G>A;ENSCAFT00000023545.4:exon9:c.690+1G>A;ENSCAFT00000069209.1:exon9:c.690+1G>A;ENSCAFT00000093160.1:exon9:c.690+1G>A;ENSCAFT00000076780.1:exon9:c.690+1G>A;ENSCAFT00000087324.1:exon9:c.690+1G>A;ENSCAFT00000069099.1:exon9:c.690+1G>A;ENSCAFT00000093513.1:exon9:c.60+1G>A			PRJNA752630	B-cell Lymphoma
SRR15508634-SRR15464858	chr20	37066873	37066873	T	C	NEK4	Splice_Site					SNP	splicing	NEK4	ENSCAFT00000083535.1:exon7:c.1650+2T>C;ENSCAFT00000014166.4:exon7:c.1650+2T>C;ENSCAFT00000086016.1:exon6:c.1014+2T>C			PRJNA752630	B-cell Lymphoma
SRR15508636-SRR15464860	chr15	50214626	50214626	C	T	FBXW7	Splice_Site					SNP	splicing	FBXW7	ENSCAFT00000012962.5:exon3:c.867+1G>A;ENSCAFT00000074984.1:exon3:c.372+1G>A;ENSCAFT00000065773.1:exon3:c.486+1G>A			PRJNA752630	B-cell Lymphoma
SRR15508636-SRR15464860	chr30	30292742	30292742	T	C	MEGF11	Splice_Site					SNP	splicing	MEGF11	ENSCAFT00000027349.5:exon8:c.763-2A>G;ENSCAFT00000087976.1:exon8:c.763-2A>G;ENSCAFT00000093863.1:exon8:c.763-2A>G;ENSCAFT00000027347.4:exon8:c.763-2A>G;ENSCAFT00000074652.1:exon7:c.670-2A>G;ENSCAFT00000065698.1:exon8:c.763-2A>G			PRJNA752630	B-cell Lymphoma
SRR15508637-SRR15464861	chr1	16817918	16817918	A	G	CCBE1	Splice_Site					SNP	splicing	CCBE1	ENSCAFT00000000149.4:exon8:c.925-2A>G;ENSCAFT00000074872.1:exon8:c.748-2A>G			PRJNA752630	B-cell Lymphoma
SRR15508637-SRR15464861	chr20	41737911	41737911	A	G	SETD2	Splice_Site					SNP	splicing	SETD2	ENSCAFT00000077709.1:exon12:c.5392-2A>G;ENSCAFT00000021260.4:exon12:c.5392-2A>G;ENSCAFT00000071377.1:exon12:c.5392-2A>G;ENSCAFT00000089264.1:exon12:c.5392-2A>G;ENSCAFT00000072365.1:exon12:c.5392-2A>G;ENSCAFT00000064752.1:exon12:c.5392-2A>G;ENSCAFT00000060515.1:exon12:c.5392-2A>G;ENSCAFT00000076367.1:exon14:c.1048-2A>G			PRJNA752630	B-cell Lymphoma
SRR15508637-SRR15464861	chr6	77395073	77395073	C	T	GADD45A	Splice_Site					SNP	splicing	GADD45A	ENSCAFT00000046905.2:exon2:c.525+1G>A;ENSCAFT00000068600.1:exon1:c.492+1G>A;ENSCAFT00000063186.1:exon3:c.627+1G>A			PRJNA752630	B-cell Lymphoma
SRR15508638-SRR15464862	chr13	55298707	55298707	C	T	TECRL	Splice_Site					SNP	splicing	TECRL	ENSCAFT00000073224.1:exon7:c.730+1G>A;ENSCAFT00000048044.2:exon7:c.730+1G>A			PRJNA752630	B-cell Lymphoma
SRR15508638-SRR15464862	chr17	52427358	52427358	C	T	CSDE1	Splice_Site					SNP	splicing	CSDE1	ENSCAFT00000063974.1:exon16:c.1779-1G>A;ENSCAFT00000015306.4:exon15:c.1701-1G>A;ENSCAFT00000069800.1:exon13:c.1641-1G>A;ENSCAFT00000071850.1:exon12:c.1548-1G>A			PRJNA752630	B-cell Lymphoma
SRR15508639-SRR15464863	chr11	12363526	12363526	G	A	SNCAIP	Splice_Site					SNP	splicing	SNCAIP	ENSCAFT00000000818.4:exon9:c.2745+1G>A;ENSCAFT00000077099.1:exon11:c.2886+1G>A			PRJNA752630	B-cell Lymphoma
SRR15508641-SRR15464865	chr15	14706876	14706876	G	A	GPBP1L1	Splice_Site					SNP	splicing	GPBP1L1	ENSCAFT00000007228.4:exon3:c.190+1G>A			PRJNA752630	B-cell Lymphoma
SRR15508641-SRR15464865	chr18	172321	172321	G	A	ABCA13	Splice_Site					SNP	splicing	ABCA13	ENSCAFT00000044856.2:exon6:c.993-1G>A			PRJNA752630	B-cell Lymphoma
SRR15508641-SRR15464865	chr35	17220529	17220529	A	G	RNF144B	Splice_Site					SNP	splicing	RNF144B	ENSCAFT00000082320.1:exon7:c.682-2A>G;ENSCAFT00000016184.3:exon7:c.682-2A>G			PRJNA752630	B-cell Lymphoma
SRR15508641-SRR15464865	chr6	42548226	42548226	A	G	PSRC1	Splice_Site					SNP	splicing	PSRC1	ENSCAFT00000073061.1:exon8:c.981-2A>G			PRJNA752630	B-cell Lymphoma
SRR1923357-SRR1928126	chr13	12455309	12455309	T	C	CSMD3	Splice_Site					SNP	splicing	CSMD3	ENSCAFT00000001238.5:exon57:c.8975-2A>G;ENSCAFT00000001231.4:exon55:c.8468-2A>G			TBCL_B	B-cell Lymphoma
SRR1923735-SRR1928125	chr29	20994526	20994527	TA	T	TRPA1	Splice_Site						splicing	TRPA1	ENSCAFT00000012682.4:exon3:r.spl;ENSCAFT00000088797.1:exon3:r.spl;ENSCAFT00000084369.1:exon3:r.spl;ENSCAFT00000085336.1:exon3:r.spl			TBCL_B	B-cell Lymphoma
SRR1923764-SRR1927967	chr9	26085652	26085652	G	A	ITGA3	Splice_Site					SNP	splicing	ITGA3	ENSCAFT00000066452.1:exon17:c.1904+1G>A;ENSCAFT00000089543.1:exon17:c.1904+1G>A;ENSCAFT00000026903.4:exon17:c.2219+1G>A			TBCL_B	B-cell Lymphoma
SRR1928083-SRR1928078	chr9	38251191	38251191	T	A	NLE1	Splice_Site					SNP	splicing	NLE1	ENSCAFT00000064259.1:exon15:c.1897+2T>A;ENSCAFT00000064259.1:exon15:UTR3;ENSCAFT00000029092.4:exon6:c.576+2T>A			TBCL_B	B-cell Lymphoma

## Sheet: T-cell Lymphoma
Tumor_Sample_Barcode	Chromosome	Start_Position	End_Position	Reference_Allele	Tumor_Seq_Allele2	Hugo_Symbol	Variant_Classification	tx	exon	txChange	aaChange	Variant_Type	Func.refGene	Gene.refGene	GeneDetail.refGene	ExonicFunc.refGene	AAChange.refGene	Project	TumorType
SRR1923067-SRR1928123	chr30	10453654	10453654	C	T	STRC	Splice_Site					SNP	splicing	STRC	ENSCAFT00000020918.4:exon14:c.3108+1G>A			TBCL_T	T-cell Lymphoma
SRR1923209-SRR1923041	chr36	25982791	25982792	TA	T	NCKAP1	Splice_Site						splicing	NCKAP1	ENSCAFT00000022879.4:exon24:r.spl;ENSCAFT00000075220.1:exon23:r.spl			TBCL_T	T-cell Lymphoma
SRR1923262-SRR1922999	chr1	112089483	112089483	A	G	CIC	Splice_Site					SNP	splicing	CIC	ENSCAFT00000082880.1:exon7:c.3607+2T>C;ENSCAFT00000083929.1:exon7:c.1924+2T>C;ENSCAFT00000007834.4:exon7:c.784+2T>C			TBCL_T	T-cell Lymphoma
SRR1923262-SRR1922999	chr14	11051431	11051431	G	C	POT1	Splice_Site					SNP	splicing	POT1	ENSCAFT00000002746.4:exon14:c.1616+1G>C;ENSCAFT00000062245.1:exon15:c.1532+1G>C;ENSCAFT00000082826.1:exon11:c.1451+1G>C;ENSCAFT00000086242.1:exon10:c.1235+1G>C;ENSCAFT00000087472.1:exon9:c.1079+1G>C;ENSCAFT00000080986.1:exon9:c.782+1G>C			TBCL_T	T-cell Lymphoma
SRR1923394-SRR1923150	chr21	37025010	37025010	G	A	SPON1	Splice_Site					SNP	splicing	SPON1	ENSCAFT00000013333.4:exon14:c.1996+1G>A			TBCL_T	T-cell Lymphoma
SRR1923436-SRR1927975	chr28	18754109	18754110	TA	T	SORCS1	Splice_Site						splicing	SORCS1	ENSCAFT00000016900.5:exon3:r.spl;ENSCAFT00000038014.3:exon3:r.spl;ENSCAFT00000078800.1:exon3:r.spl			TBCL_T	T-cell Lymphoma
SRR1923558-SRR1923547	chr1	112087635	112087635	C	T	CIC	Splice_Site					SNP	splicing	CIC	ENSCAFT00000082880.1:exon10:c.4140+1G>A;ENSCAFT00000083929.1:exon10:c.2457+1G>A;ENSCAFT00000007834.4:exon10:c.1317+1G>A			TBCL_T	T-cell Lymphoma
SRR1923647-SRR1923639	chr4	4498396	4498397	TA	T	TBCE	Splice_Site						splicing	TBCE	ENSCAFT00000036540.4:exon11:r.spl;ENSCAFT00000074504.1:exon9:r.spl;ENSCAFT00000017948.3:exon10:r.spl;ENSCAFT00000062810.1:exon11:r.spl			TBCL_T	T-cell Lymphoma
SRR1923734-SRR1928043	chr10	9671904	9671904	A	T	CAND1	Splice_Site					SNP	splicing	CAND1	ENSCAFT00000091922.1:exon9:c.1225-2A>T;ENSCAFT00000000639.5:exon9:c.1237-2A>T			TBCL_T	T-cell Lymphoma
SRR1924047-SRR1927990	chr16	27466234	27466234	G	A	GOT1L1	Splice_Site					SNP	splicing	GOT1L1	ENSCAFT00000009972.4:exon7:c.764-1G>A			TBCL_T	T-cell Lymphoma
SRR1928042-SRR1928036	chr1	69447389	69447389	G	C	AKAP7	Splice_Site					SNP	splicing	AKAP7	ENSCAFT00000084240.1:exon7:c.853+1G>C;ENSCAFT00000088822.1:exon2:c.757+1G>C			TBCL_T	T-cell Lymphoma
SRR1928042-SRR1928036	chr26	31055271	31055272	TA	T	MAPK1	Splice_Site						splicing	MAPK1	ENSCAFT00000035708.3:exon2:r.spl;ENSCAFT00000086868.1:exon2:r.spl			TBCL_T	T-cell Lymphoma
SRR1928060-SRR1927945	chr28	33227019	33227019	C	T	CPXM2	Splice_Site					SNP	splicing	CPXM2	ENSCAFT00000083599.1:exon19:c.3109-1G>A;ENSCAFT00000020154.4:exon13:c.1699-1G>A;ENSCAFT00000046613.3:exon13:c.1927-1G>A			TBCL_T	T-cell Lymphoma
SRR2175575-SRR2175571	chr24	25646740	25646740	C	G	SAMHD1	Splice_Site					SNP	splicing	SAMHD1	ENSCAFT00000063776.1:exon7:c.720+1G>C;ENSCAFT00000013745.3:exon7:c.852+1G>C;ENSCAFT00000064471.1:exon7:c.852+1G>C;ENSCAFT00000092592.1:exon7:c.852+1G>C			TBCL_T	T-cell Lymphoma
SRR2175655-SRR2175626	chr1	64884070	64884070	G	T	TRMT11	Splice_Site					SNP	splicing	TRMT11	ENSCAFT00000035268.3:exon10:c.797-1G>T;ENSCAFT00000067945.1:exon8:c.680-1G>T;ENSCAFT00000074187.1:exon8:c.680-1G>T;ENSCAFT00000001624.5:exon8:c.680-1G>T;ENSCAFT00000073052.1:exon8:c.680-1G>T			TBCL_T	T-cell Lymphoma
SRR2175655-SRR2175626	chr2	10833451	10833451	A	T	COMMD3	Splice_Site					SNP	splicing	COMMD3	ENSCAFT00000066055.1:exon1:c.139+2T>A;ENSCAFT00000006668.4:exon1:c.139+2T>A			TBCL_T	T-cell Lymphoma
SRR2175655-SRR2175626	chr2	41648665	41648665	C	A	STK32A	Splice_Site					SNP	splicing	STK32A	ENSCAFT00000060740.1:exon6:c.489+1C>A;ENSCAFT00000060740.1:exon7:c.490-2C>A			TBCL_T	T-cell Lymphoma
SRR2180279-SRR2180273	chr32	26139601	26139601	G	T	TET2	Splice_Site					SNP	splicing	TET2	ENSCAFT00000017275.4:exon10:c.4213-1G>T			TBCL_T	T-cell Lymphoma
SRR2180282-SRR2180274	chr10	69288509	69288509	G	T	ANKRD53	Splice_Site					SNP	splicing	ANKRD53	ENSCAFT00000043506.3:exon3:c.210-1G>T;ENSCAFT00000005567.5:exon2:c.66-1G>T			TBCL_T	T-cell Lymphoma

## Sheet: Glioma
Tumor_Sample_Barcode	Chromosome	Start_Position	End_Position	Reference_Allele	Tumor_Seq_Allele2	Hugo_Symbol	Variant_Classification	tx	exon	txChange	aaChange	Variant_Type	Func.refGene	Gene.refGene	GeneDetail.refGene	ExonicFunc.refGene	AAChange.refGene	Project	TumorType
SRR10351564-SRR10351565	chr22	8560595	8560595	C	T	DGKH	Splice_Site					SNP	splicing	DGKH	ENSCAFT00000007625.4:exon22:c.2541+1G>A;ENSCAFT00000079624.1:exon22:c.2652+1G>A;ENSCAFT00000083025.1:exon22:c.2652+1G>A;ENSCAFT00000084170.1:exon22:c.2541+1G>A			PRJNA579792	Glioma
SRR10351571-SRR10351572	chr1	20292206	20292206	G	A	TCF4	Splice_Site					SNP	splicing	TCF4	ENSCAFT00000048913.3:exon6:c.109+1G>A;ENSCAFT00000093611.1:exon7:c.493+1G>A;ENSCAFT00000000232.4:exon6:c.499+1G>A;ENSCAFT00000064769.1:exon6:c.499+1G>A;ENSCAFT00000087833.1:exon5:c.373+1G>A;ENSCAFT00000072359.1:exon4:c.286+1G>A			PRJNA579792	Glioma
SRR10351571-SRR10351572	chr10	7670359	7670359	C	T	WIF1	Splice_Site					SNP	splicing	WIF1	ENSCAFT00000087301.1:exon7:c.731-1G>A;ENSCAFT00000000572.4:exon7:c.731-1G>A			PRJNA579792	Glioma
SRR10351571-SRR10351572	chr17	19415554	19415554	G	A	EFR3B	Splice_Site					SNP	splicing	EFR3B	ENSCAFT00000006641.4:exon17:c.2219+1G>A			PRJNA579792	Glioma
SRR10351571-SRR10351572	chr2	33895271	33895271	C	T	WDR37	Splice_Site					SNP	splicing	WDR37	ENSCAFT00000073383.1:exon8:c.726+1G>A;ENSCAFT00000081240.1:exon7:c.642+1G>A;ENSCAFT00000069736.1:exon6:c.597+1G>A;ENSCAFT00000074249.1:exon7:c.642+1G>A;ENSCAFT00000071911.1:exon9:c.798+1G>A;ENSCAFT00000008896.4:exon9:c.798+1G>A;ENSCAFT00000093645.1:exon8:c.591+1G>A;ENSCAFT00000071309.1:exon8:c.621+1G>A;ENSCAFT00000064429.1:exon7:c.588+1G>A;ENSCAFT00000080732.1:exon7:c.642+1G>A			PRJNA579792	Glioma
SRR10351571-SRR10351572	chr2	65077564	65077564	C	T	TENT4B	Splice_Site					SNP	splicing	TENT4B	ENSCAFT00000015808.4:exon12:c.1608+1G>A;ENSCAFT00000049926.3:exon10:c.1773+1G>A;ENSCAFT00000046476.3:exon10:c.1773+1G>A			PRJNA579792	Glioma
SRR10351571-SRR10351572	chr2	69035504	69035504	C	T	KPNA6	Splice_Site					SNP	splicing	KPNA6	ENSCAFT00000017097.6:exon10:c.912-1G>A			PRJNA579792	Glioma
SRR10351571-SRR10351572	chr2	72382666	72382666	G	T	EYA3	Splice_Site					SNP	splicing	EYA3	ENSCAFT00000018974.4:exon8:c.585+1G>T;ENSCAFT00000077250.1:exon7:c.447+1G>T;ENSCAFT00000068746.1:exon2:c.117+1G>T			PRJNA579792	Glioma
SRR10351571-SRR10351572	chr30	20947861	20947861	C	T	PRTG	Splice_Site					SNP	splicing	PRTG	ENSCAFT00000025251.5:exon18:c.2853+1G>A			PRJNA579792	Glioma
SRR10351571-SRR10351572	chr31	17376895	17376895	G	A	NCAM2	Splice_Site					SNP	splicing	NCAM2	ENSCAFT00000062120.1:exon13:c.1774+1G>A;ENSCAFT00000080757.1:exon13:c.1753+1G>A;ENSCAFT00000013401.4:exon12:c.1720+1G>A			PRJNA579792	Glioma
SRR10351571-SRR10351572	chr35	1000826	1000826	C	T	EXOC2	Splice_Site					SNP	splicing	EXOC2	ENSCAFT00000014607.4:exon7:c.742+1G>A;ENSCAFT00000088556.1:exon7:c.742+1G>A			PRJNA579792	Glioma
SRR10351571-SRR10351572	chr36	6071147	6071147	C	T	RBMS1	Splice_Site					SNP	splicing	RBMS1	ENSCAFT00000073635.1:exon2:c.152+1G>A;ENSCAFT00000090310.1:exon2:c.152+1G>A;ENSCAFT00000015788.4:exon2:c.287+1G>A;ENSCAFT00000015804.5:exon2:c.245+1G>A			PRJNA579792	Glioma
SRR10351571-SRR10351572	chr4	42959288	42959288	G	A	SLIT3	Splice_Site					SNP	splicing	SLIT3	ENSCAFT00000092459.1:exon8:c.432-1G>A;ENSCAFT00000026988.3:exon4:c.183-1G>A			PRJNA579792	Glioma
SRR10351571-SRR10351572	chr5	9567230	9567230	A	G	ROBO3	Splice_Site					SNP	splicing	ROBO3	ENSCAFT00000066346.1:exon18:c.2957+2T>C;ENSCAFT00000017695.4:exon19:c.2849+2T>C;ENSCAFT00000091698.1:exon2:c.133+2T>C			PRJNA579792	Glioma
SRR10351571-SRR10351572	chr7	10354312	10354312	G	T	DTL	Splice_Site					SNP	splicing	DTL	ENSCAFT00000019500.4:exon13:c.1126-1G>T;ENSCAFT00000071842.1:exon12:c.1000-1G>T			PRJNA579792	Glioma
SRR10351571-SRR10351572	chr8	50244735	50244735	C	T	VIPAS39	Splice_Site					SNP	splicing	VIPAS39	ENSCAFT00000078773.1:exon9:c.825+1G>A;ENSCAFT00000083748.1:exon9:c.825+1G>A;ENSCAFT00000027249.4:exon10:c.762+1G>A;ENSCAFT00000027252.3:exon9:c.615+1G>A			PRJNA579792	Glioma
SRR10351571-SRR10351572	chr9	55841353	55841353	A	G	NIBAN2	Splice_Site					SNP	splicing	NIBAN2	ENSCAFT00000032043.3:exon4:c.316-2A>G			PRJNA579792	Glioma
SRR10351577-SRR10351579	chr24	22479878	22479878	G	T	BPIFA1	Splice_Site					SNP	splicing	BPIFA1	ENSCAFT00000011803.4:exon12:c.578+1G>T;ENSCAFT00000060191.1:exon12:c.578+1G>T;ENSCAFT00000071832.1:exon12:c.578+1G>T			PRJNA579792	Glioma
SRR10351699-SRR10351700	chr11	74126834	74126834	G	A	CNTRL	Splice_Site					SNP	splicing	CNTRL	ENSCAFT00000073663.1:exon16:c.2694+1G>A;ENSCAFT00000005830.4:exon17:c.2751+1G>A;ENSCAFT00000082789.1:exon17:c.2751+1G>A;ENSCAFT00000005822.4:exon16:c.2694+1G>A;ENSCAFT00000069087.1:exon17:c.2751+1G>A			PRJNA579792	Glioma
SRR10351699-SRR10351700	chr12	23363844	23363844	C	T	COL21A1	Splice_Site					SNP	splicing	COL21A1	ENSCAFT00000003677.5:exon26:c.2352+1G>A;ENSCAFT00000044037.2:exon25:c.2349+1G>A			PRJNA579792	Glioma
SRR10351699-SRR10351700	chr15	14116652	14116652	C	T	RAD54L	Splice_Site					SNP	splicing	RAD54L	ENSCAFT00000006871.4:exon11:c.1244+1G>A			PRJNA579792	Glioma
SRR10351699-SRR10351700	chr16	8274079	8274079	G	A	BRAF	Splice_Site					SNP	splicing	BRAF	ENSCAFT00000006305.5:exon10:c.1278+1G>A;ENSCAFT00000006306.4:exon10:c.1296+1G>A;ENSCAFT00000092688.1:exon9:c.1158+1G>A			PRJNA579792	Glioma
SRR10351699-SRR10351700	chr17	60120330	60120330	G	T	PRUNE1	Splice_Site					SNP	splicing	PRUNE1	ENSCAFT00000019621.4:exon7:c.775-1G>T			PRJNA579792	Glioma
SRR10351699-SRR10351700	chr17	60234536	60234536	C	T	TMOD4	Splice_Site					SNP	splicing	TMOD4	ENSCAFT00000019896.3:exon9:c.1015+1G>A			PRJNA579792	Glioma
SRR10351699-SRR10351700	chr19	29995788	29995788	C	T	EPB41L5	Splice_Site					SNP	splicing	EPB41L5	ENSCAFT00000068480.1:exon14:c.1151-1G>A;ENSCAFT00000007825.4:exon14:c.1151-1G>A;ENSCAFT00000092758.1:exon14:c.1151-1G>A;ENSCAFT00000066835.1:exon14:c.1151-1G>A;ENSCAFT00000076523.1:exon12:c.1046-1G>A;ENSCAFT00000046341.2:exon14:c.1151-1G>A;ENSCAFT00000049397.2:exon14:c.1151-1G>A			PRJNA579792	Glioma
SRR10351699-SRR10351700	chr20	31851227	31851227	G	A	CFAP20DC	Splice_Site					SNP	splicing	CFAP20DC	ENSCAFT00000060151.1:exon11:c.1132+1G>A;ENSCAFT00000011559.4:exon9:c.760+1G>A;ENSCAFT00000083516.1:exon8:c.721+1G>A			PRJNA579792	Glioma
SRR10351699-SRR10351700	chr28	31954117	31954117	G	T	BTBD16	Splice_Site					SNP	splicing	BTBD16	ENSCAFT00000019901.5:exon2:c.167+1G>T			PRJNA579792	Glioma
SRR10351699-SRR10351700	chr32	9662078	9662078	C	T	MAPK10	Splice_Site					SNP	splicing	MAPK10	ENSCAFT00000065132.1:exon7:c.616+1G>A;ENSCAFT00000014960.5:exon7:c.739+1G>A;ENSCAFT00000082902.1:exon7:c.730+1G>A;ENSCAFT00000086123.1:exon7:c.730+1G>A;ENSCAFT00000062296.1:exon7:c.616+1G>A;ENSCAFT00000080032.1:exon7:c.616+1G>A;ENSCAFT00000014956.4:exon7:c.730+1G>A;ENSCAFT00000062531.1:exon7:c.730+1G>A			PRJNA579792	Glioma
SRR10351699-SRR10351700	chr38	14939093	14939173	CTTACATAGAGGGAGAAAAAAAGAGAGAGAGAAAAGAAGAGGTATCATTTAACAGATGTTTCCAATACAAATGGGGACTTT	C	RAB3GAP2	Splice_Site						splicing	RAB3GAP2				PRJNA579792	Glioma
SRR10351699-SRR10351700	chr5	46515830	46515830	C	T	PGM1	Splice_Site					SNP	splicing	PGM1	ENSCAFT00000029658.4:exon10:c.1560+1G>A;ENSCAFT00000029658.4:exon10:UTR3;ENSCAFT00000073102.1:exon11:c.1761+1G>A;ENSCAFT00000073102.1:exon11:UTR3			PRJNA579792	Glioma
SRR10351699-SRR10351700	chr6	43192690	43192690	C	T	FAM102B	Splice_Site					SNP	splicing	FAM102B	ENSCAFT00000091916.1:exon5:c.452+1G>A;ENSCAFT00000031716.4:exon5:c.452+1G>A;ENSCAFT00000067217.1:exon4:c.422+1G>A			PRJNA579792	Glioma
SRR10351703-SRR10351704	chr12	33311232	33311232	G	T	SMAP1	Splice_Site					SNP	splicing	SMAP1	ENSCAFT00000004110.5:exon8:c.795+1G>T;ENSCAFT00000004108.4:exon7:c.714+1G>T;ENSCAFT00000065048.1:exon7:c.714+1G>T;ENSCAFT00000073837.1:exon6:c.633+1G>T;ENSCAFT00000070339.1:exon6:c.615+1G>T;ENSCAFT00000081170.1:exon8:c.768+1G>T			PRJNA579792	Glioma
SRR10351703-SRR10351704	chr24	42379838	42379838	G	A	SPO11	Splice_Site					SNP	splicing	SPO11	ENSCAFT00000019134.4:exon9:c.788+1G>A			PRJNA579792	Glioma
SRR10351703-SRR10351704	chr9	38349447	38349447	C	T	LIG3	Splice_Site					SNP	splicing	LIG3	ENSCAFT00000064099.1:exon16:c.2334+1G>A;ENSCAFT00000088595.1:exon15:c.2256+1G>A;ENSCAFT00000048097.3:exon17:c.2232+1G>A;ENSCAFT00000029122.4:exon15:c.2334+1G>A			PRJNA579792	Glioma
SRR10351705-SRR10351706	chr15	3551914	3551914	C	T	MACF1	Splice_Site					SNP	splicing	MACF1	ENSCAFT00000050149.3:exon4:UTR5;ENSCAFT00000005050.4:exon4:UTR5;ENSCAFT00000088196.1:exon4:UTR5;ENSCAFT00000076131.1:exon4:c.504+1G>A;ENSCAFT00000081549.1:exon4:UTR5;ENSCAFT00000060960.1:exon4:c.504+1G>A;ENSCAFT00000067044.1:exon2:c.222+1G>A			PRJNA579792	Glioma
SRR10351710-SRR10351711	chr1	30623722	30623722	G	T	ARFGEF3	Splice_Site					SNP	splicing	ARFGEF3	ENSCAFT00000044681.3:exon21:c.3886-1G>T;ENSCAFT00000086635.1:exon20:c.3763-1G>T;ENSCAFT00000000423.4:exon19:c.3631-1G>T;ENSCAFT00000066773.1:exon19:c.3433-1G>T;ENSCAFT00000083086.1:exon19:c.3712-1G>T			PRJNA579792	Glioma
SRR10351710-SRR10351711	chr1	49237678	49237678	G	A	IGF2R	Splice_Site					SNP	splicing	IGF2R	ENSCAFT00000066983.1:exon32:c.4368+1G>A;ENSCAFT00000001105.5:exon31:c.4455+1G>A;ENSCAFT00000049827.1:exon31:c.4455+1G>A;ENSCAFT00000090357.1:exon31:c.4455+1G>A;ENSCAFT00000067279.1:exon29:c.4176+1G>A;ENSCAFT00000068367.1:exon31:c.4350+1G>A			PRJNA579792	Glioma
SRR10351710-SRR10351711	chr10	16991464	16991464	G	A	MAPK12	Splice_Site					SNP	splicing	MAPK12	ENSCAFT00000001068.4:exon9:c.688+1G>A;ENSCAFT00000045629.3:exon8:c.658+1G>A			PRJNA579792	Glioma
SRR10351710-SRR10351711	chr11	3559503	3559503	G	A	YTHDC2	Splice_Site					SNP	splicing	YTHDC2	ENSCAFT00000000357.5:exon8:c.1207+1G>A			PRJNA579792	Glioma
SRR10351710-SRR10351711	chr11	65317678	65317678	C	T	SVEP1	Splice_Site					SNP	splicing	SVEP1	ENSCAFT00000076392.1:exon48:c.10901+1G>A;ENSCAFT00000090033.1:exon47:c.10781+1G>A;ENSCAFT00000080709.1:exon47:c.10688+1G>A;ENSCAFT00000062190.1:exon48:c.10901+1G>A;ENSCAFT00000004697.5:exon47:c.10277+1G>A;ENSCAFT00000046535.3:exon48:c.10901+1G>A;ENSCAFT00000080730.1:exon47:c.10745+1G>A;ENSCAFT00000066118.1:exon47:c.10709+1G>A;ENSCAFT00000084214.1:exon47:c.10667+1G>A;ENSCAFT00000046390.3:exon46:c.…			PRJNA579792	Glioma
SRR10351710-SRR10351711	chr11	70062578	70062578	G	A	PAPPA	Splice_Site					SNP	splicing	PAPPA	ENSCAFT00000005614.3:exon8:c.2312+1G>A			PRJNA579792	Glioma
SRR10351710-SRR10351711	chr13	35202916	35202916	C	T	AGO2	Splice_Site					SNP	splicing	AGO2	ENSCAFT00000061641.1:exon5:c.676+1G>A;ENSCAFT00000090698.1:exon5:c.664+1G>A;ENSCAFT00000001857.4:exon5:c.517+1G>A			PRJNA579792	Glioma
SRR10351710-SRR10351711	chr13	44404538	44404538	C	T	FRYL	Splice_Site					SNP	splicing	FRYL	ENSCAFT00000074524.1:exon16:c.1823+1G>A;ENSCAFT00000084808.1:exon18:c.1685+1G>A;ENSCAFT00000062632.1:exon18:c.803+1G>A;ENSCAFT00000003145.5:exon17:c.1640+1G>A;ENSCAFT00000071992.1:exon17:c.1640+1G>A;ENSCAFT00000090909.1:exon17:c.1640+1G>A;ENSCAFT00000087888.1:exon17:c.1985+1G>A;ENSCAFT00000003138.4:exon16:c.1793+1G>A;ENSCAFT00000062767.1:exon16:c.1823+1G>A;ENSCAFT00000087793.1:exon16:c.1823+1G>A			PRJNA579792	Glioma
SRR10351710-SRR10351711	chr14	11044613	11044613	G	A	POT1	Splice_Site					SNP	splicing	POT1	ENSCAFT00000002746.4:exon12:c.1402+1G>A;ENSCAFT00000062245.1:exon13:c.1318+1G>A;ENSCAFT00000082826.1:exon9:c.1237+1G>A;ENSCAFT00000086242.1:exon8:c.1021+1G>A;ENSCAFT00000087472.1:exon7:c.865+1G>A;ENSCAFT00000080986.1:exon7:c.568+1G>A			PRJNA579792	Glioma
SRR10351710-SRR10351711	chr15	26690356	26690356	G	A	LRRIQ1	Splice_Site					SNP	splicing	LRRIQ1	ENSCAFT00000085262.1:exon16:c.3353+1G>A;ENSCAFT00000081215.1:exon16:c.3353+1G>A;ENSCAFT00000044438.2:exon16:c.3353+1G>A;ENSCAFT00000059604.1:exon15:c.3278+1G>A;ENSCAFT00000087364.1:exon16:c.3353+1G>A;ENSCAFT00000070229.1:exon15:c.3200+1G>A;ENSCAFT00000088105.1:exon16:c.3353+1G>A;ENSCAFT00000064884.1:exon16:c.3353+1G>A			PRJNA579792	Glioma
SRR10351710-SRR10351711	chr15	43861625	43861625	C	T	OTUD4	Splice_Site					SNP	splicing	OTUD4	ENSCAFT00000076396.1:exon1:c.159+1G>A;ENSCAFT00000077717.1:exon1:c.159+1G>A;ENSCAFT00000012205.4:exon1:c.159+1G>A			PRJNA579792	Glioma
SRR10351710-SRR10351711	chr16	45270606	45270606	C	T	SNX25	Splice_Site					SNP	splicing	SNX25	ENSCAFT00000091045.1:exon18:c.2772+1G>A;ENSCAFT00000064379.1:exon17:c.2484+1G>A;ENSCAFT00000083434.1:exon17:c.1590+1G>A;ENSCAFT00000038740.3:exon18:c.2553+1G>A			PRJNA579792	Glioma
SRR10351710-SRR10351711	chr17	21205610	21205610	G	A	CAD	Splice_Site					SNP	splicing	CAD	ENSCAFT00000049604.2:exon14:c.1842+1G>A;ENSCAFT00000007712.5:exon14:c.1842+1G>A;ENSCAFT00000089405.1:exon14:c.1842+1G>A			PRJNA579792	Glioma
SRR10351710-SRR10351711	chr17	29274252	29274252	C	T	STRN	Splice_Site					SNP	splicing	STRN	ENSCAFT00000047305.3:exon17:c.1870+1G>A;ENSCAFT00000009589.4:exon16:c.1864+1G>A			PRJNA579792	Glioma
SRR10351710-SRR10351711	chr18	37167042	37167042	G	A	OSBP	Splice_Site					SNP	splicing	OSBP	ENSCAFT00000012167.4:exon4:c.825+1G>A			PRJNA579792	Glioma
SRR10351710-SRR10351711	chr18	38743601	38743601	G	A	SLC43A3	Splice_Site					SNP	splicing	SLC43A3	ENSCAFT00000012585.3:exon11:c.1374+1G>A;ENSCAFT00000080405.1:exon12:c.1269+1G>A;ENSCAFT00000084066.1:exon10:c.1263+1G>A			PRJNA579792	Glioma
SRR10351710-SRR10351711	chr2	62359645	62359645	C	T	CHD9	Splice_Site					SNP	splicing	CHD9	ENSCAFT00000015413.5:exon34:c.7063-1G>A;ENSCAFT00000074670.1:exon33:c.6895-1G>A;ENSCAFT00000068005.1:exon33:c.1252-1G>A;ENSCAFT00000061031.1:exon33:c.5638-1G>A			PRJNA579792	Glioma
SRR10351710-SRR10351711	chr2	73283255	73283255	C	T	ZDHHC18	Splice_Site					SNP	splicing	ZDHHC18	ENSCAFT00000019525.4:exon2:c.241+1G>A			PRJNA579792	Glioma
SRR10351710-SRR10351711	chr20	40193155	40193155	C	A	ARIH2	Splice_Site					SNP	splicing	ARIH2	ENSCAFT00000019122.5:exon5:c.318-1G>T			PRJNA579792	Glioma
SRR10351710-SRR10351711	chr20	43506227	43506227	C	T	KIF15	Splice_Site					SNP	splicing	KIF15	ENSCAFT00000022406.5:exon7:c.639+1G>A			PRJNA579792	Glioma
SRR10351710-SRR10351711	chr20	57811496	57811496	A	G	PTBP1	Splice_Site					SNP	splicing	PTBP1	ENSCAFT00000031317.3:exon8:c.979+2T>C;ENSCAFT00000049054.3:exon8:c.892+2T>C			PRJNA579792	Glioma
SRR10351710-SRR10351711	chr22	52182511	52182519	TAAGAGATA	T	METTL21C	Splice_Site						splicing	METTL21C				PRJNA579792	Glioma
SRR10351710-SRR10351711	chr23	37180277	37180277	G	A	PXYLP1	Splice_Site					SNP	splicing	PXYLP1	ENSCAFT00000091100.1:exon5:c.365+1G>A;ENSCAFT00000043935.2:exon5:c.308+1G>A;ENSCAFT00000012257.4:exon3:c.317+1G>A			PRJNA579792	Glioma
SRR10351710-SRR10351711	chr25	1568913	1568913	G	A	LHFPL6	Splice_Site					SNP	splicing	LHFPL6	ENSCAFT00000009676.4:exon2:UTR5			PRJNA579792	Glioma
SRR10351710-SRR10351711	chr26	7288288	7288288	C	T	BCL7A	Splice_Site					SNP	splicing	BCL7A	ENSCAFT00000071519.1:exon2:c.174+1G>A;ENSCAFT00000044123.2:exon2:c.186+1G>A			PRJNA579792	Glioma
SRR10351710-SRR10351711	chr30	8590141	8590141	G	A	TYRO3	Splice_Site					SNP	splicing	TYRO3	ENSCAFT00000047765.3:exon8:c.878-1G>A;ENSCAFT00000062475.1:exon8:c.827-1G>A;ENSCAFT00000015311.4:exon8:c.857-1G>A			PRJNA579792	Glioma
SRR10351710-SRR10351711	chr35	19156750	19156750	A	G	CDKAL1	Splice_Site					SNP	splicing	CDKAL1	ENSCAFT00000069711.1:exon2:UTR5;ENSCAFT00000076571.1:exon2:UTR5;ENSCAFT00000069284.1:exon2:UTR5;ENSCAFT00000070660.1:exon2:UTR5;ENSCAFT00000093366.1:exon2:UTR5;ENSCAFT00000066026.1:exon2:UTR5;ENSCAFT00000069473.1:exon2:UTR5;ENSCAFT00000016240.4:exon2:UTR5			PRJNA579792	Glioma
SRR10351710-SRR10351711	chr37	6000916	6000916	C	T	HECW2	Splice_Site					SNP	splicing	HECW2	ENSCAFT00000045680.3:exon3:c.400+1G>A			PRJNA579792	Glioma
SRR10351710-SRR10351711	chr37	6931985	6931985	C	T	SF3B1	Splice_Site					SNP	splicing	SF3B1	ENSCAFT00000017219.4:exon19:c.2872-1G>A;ENSCAFT00000065169.1:exon17:c.2503-1G>A;ENSCAFT00000060319.1:exon18:c.2497-1G>A;ENSCAFT00000073927.1:exon18:c.2497-1G>A;ENSCAFT00000087622.1:exon18:c.2497-1G>A			PRJNA579792	Glioma
SRR10351710-SRR10351711	chr5	56601297	56601297	G	A	ATAD3A	Splice_Site					SNP	splicing	ATAD3A	ENSCAFT00000030573.4:exon10:c.961-1G>A			PRJNA579792	Glioma
SRR10351710-SRR10351711	chr5	64642843	64642843	C	T	CTU2	Splice_Site					SNP	splicing	CTU2	ENSCAFT00000031626.5:exon6:c.450+1G>A;ENSCAFT00000031625.4:exon6:c.450+1G>A			PRJNA579792	Glioma
SRR10351710-SRR10351711	chr9	260782	260782	G	A	DUS1L	Splice_Site					SNP	splicing	DUS1L	ENSCAFT00000045880.3:exon12:c.1175-1G>A;ENSCAFT00000069484.1:exon11:c.1124-1G>A;ENSCAFT00000009615.4:exon13:c.1301-1G>A;ENSCAFT00000081550.1:exon13:c.1301-1G>A			PRJNA579792	Glioma
SRR10351710-SRR10351711	chr9	3952618	3952618	C	T	MGAT5B	Splice_Site					SNP	splicing	MGAT5B	ENSCAFT00000049957.3:exon1:c.68+1G>A			PRJNA579792	Glioma
SRR10351710-SRR10351711	chr9	4027355	4027355	C	T	MFSD11	Splice_Site					SNP	splicing	MFSD11	ENSCAFT00000008310.4:exon2:c.96+1G>A;ENSCAFT00000064720.1:exon2:c.96+1G>A			PRJNA579792	Glioma
SRR10351710-SRR10351711	chr9	49517936	49517936	C	G	CAMSAP1	Splice_Site					SNP	splicing	CAMSAP1	ENSCAFT00000031364.4:exon17:c.4467+2C>G;ENSCAFT00000078831.1:exon16:c.4434+2C>G;ENSCAFT00000090418.1:exon15:c.4221+2C>G;ENSCAFT00000088414.1:exon14:c.4155+2C>G;ENSCAFT00000059786.1:exon15:c.3954+2C>G			PRJNA579792	Glioma
SRR10351712-SRR10351713	chr1	49036876	49036876	C	T	TCP1	Splice_Site					SNP	splicing	TCP1	ENSCAFT00000001141.4:exon2:c.150+1G>A;ENSCAFT00000063465.1:exon2:c.150+1G>A			PRJNA579792	Glioma
SRR10351712-SRR10351713	chr11	70040923	70040923	G	A	PAPPA	Splice_Site					SNP	splicing	PAPPA	ENSCAFT00000005614.3:exon4:c.1501+1G>A			PRJNA579792	Glioma
SRR10351712-SRR10351713	chr12	1425113	1425113	C	T	DXO	Splice_Site					SNP	splicing	DXO	ENSCAFT00000001079.4:exon5:c.948+1G>A			PRJNA579792	Glioma
SRR10351712-SRR10351713	chr12	40956867	40956867	G	A	TTK	Splice_Site					SNP	splicing	TTK	ENSCAFT00000042939.3:exon22:c.2482-1G>A;ENSCAFT00000004549.4:exon23:c.2535-1G>A			PRJNA579792	Glioma
SRR10351712-SRR10351713	chr12	57741378	57741378	C	T	CCNC	Splice_Site					SNP	splicing	CCNC	ENSCAFT00000005668.5:exon10:c.646-1G>A;ENSCAFT00000082877.1:exon10:c.646-1G>A			PRJNA579792	Glioma
SRR10351712-SRR10351713	chr13	26918209	26918209	G	A	GSDMC	Splice_Site					SNP	splicing	GSDMC	ENSCAFT00000001658.4:exon10:c.1082-1G>A			PRJNA579792	Glioma
SRR10351712-SRR10351713	chr14	38602838	38602838	C	T	C14H7orf31	Splice_Site					SNP	splicing	C14H7orf31	ENSCAFT00000080673.1:exon8:c.693+1G>A;ENSCAFT00000004575.5:exon7:c.675+1G>A;ENSCAFT00000049403.2:exon6:c.645+1G>A			PRJNA579792	Glioma
SRR10351712-SRR10351713	chr14	42077166	42077166	C	T	CPVL	Splice_Site					SNP	splicing	CPVL	ENSCAFT00000068882.1:exon12:c.1335+1G>A;ENSCAFT00000004847.5:exon12:c.1347+1G>A;ENSCAFT00000004848.4:exon10:c.1326+1G>A			PRJNA579792	Glioma
SRR10351712-SRR10351713	chr15	1090218	1090218	G	A	GUCA2A	Splice_Site					SNP	splicing	GUCA2A	ENSCAFT00000004045.3:exon1:c.75+1G>A			PRJNA579792	Glioma
SRR10351712-SRR10351713	chr15	14372836	14372836	C	T	MAST2	Splice_Site					SNP	splicing	MAST2	ENSCAFT00000046513.3:exon14:c.1518+1G>A;ENSCAFT00000077797.1:exon13:c.1497+1G>A;ENSCAFT00000007093.4:exon12:c.1227+1G>A;ENSCAFT00000072700.1:exon12:c.1083+1G>A;ENSCAFT00000092211.1:exon12:c.1251+1G>A;ENSCAFT00000072291.1:exon11:c.1056+1G>A			PRJNA579792	Glioma
SRR10351712-SRR10351713	chr15	18444512	18444512	C	T	CHD8	Splice_Site					SNP	splicing	CHD8	ENSCAFT00000077539.1:exon23:c.4570+1G>A;ENSCAFT00000091906.1:exon23:c.4570+1G>A;ENSCAFT00000062977.1:exon23:c.4570+1G>A;ENSCAFT00000009072.5:exon24:c.4447+1G>A;ENSCAFT00000009065.5:exon24:c.4525+1G>A			PRJNA579792	Glioma
SRR10351712-SRR10351713	chr15	45965265	45965265	G	A	TMEM184C	Splice_Site					SNP	splicing	TMEM184C	ENSCAFT00000012411.4:exon5:c.626+1G>A;ENSCAFT00000085645.1:exon3:c.470+1G>A			PRJNA579792	Glioma
SRR10351712-SRR10351713	chr17	19260267	19260267	A	C	DNAJC27	Splice_Site					SNP	splicing	DNAJC27	ENSCAFT00000006556.3:exon7:c.825+2T>G;ENSCAFT00000006556.3:exon7:UTR3			PRJNA579792	Glioma
SRR10351712-SRR10351713	chr17	22204389	22204389	G	A	BABAM2	Splice_Site					SNP	splicing	BABAM2	ENSCAFT00000063942.1:exon8:c.851+1G>A;ENSCAFT00000008397.4:exon8:c.851+1G>A;ENSCAFT00000008394.5:exon7:c.776+1G>A			PRJNA579792	Glioma
SRR10351712-SRR10351713	chr17	48851031	48851031	G	A	SLC4A5	Splice_Site					SNP	splicing	SLC4A5	ENSCAFT00000072145.1:exon14:c.2041+1G>A;ENSCAFT00000013814.5:exon14:c.2041+1G>A;ENSCAFT00000080142.1:exon13:c.1849+1G>A			PRJNA579792	Glioma
SRR10351712-SRR10351713	chr17	55279666	55279666	C	T	SPAG17	Splice_Site					SNP	splicing	SPAG17	ENSCAFT00000015854.4:exon43:c.6007+1G>A			PRJNA579792	Glioma
SRR10351712-SRR10351713	chr17	59740929	59740929	G	A	ADAMTSL4	Splice_Site					SNP	splicing	ADAMTSL4	ENSCAFT00000082266.1:exon4:c.1161+1G>A;ENSCAFT00000019127.4:exon5:c.1116+1G>A			PRJNA579792	Glioma
SRR10351712-SRR10351713	chr18	34574314	34574314	C	T	TCP11L1	Splice_Site					SNP	splicing	TCP11L1	ENSCAFT00000011688.4:exon8:c.1324+1G>A			PRJNA579792	Glioma
SRR10351712-SRR10351713	chr18	54581328	54581328	C	T	FADS2	Splice_Site					SNP	splicing	FADS2	ENSCAFT00000025448.4:exon2:c.204+1G>A			PRJNA579792	Glioma
SRR10351712-SRR10351713	chr2	73905314	73905314	G	A	TRIM63	Splice_Site					SNP	splicing	TRIM63	ENSCAFT00000089579.1:exon7:c.1028+1G>A;ENSCAFT00000020117.4:exon6:c.854+1G>A;ENSCAFT00000086460.1:exon6:c.854+1G>A			PRJNA579792	Glioma
SRR10351712-SRR10351713	chr2	78264730	78264730	A	G	KIF17	Splice_Site					SNP	splicing	KIF17	ENSCAFT00000087108.1:exon15:c.2704-2A>G;ENSCAFT00000043067.3:exon14:c.2446-2A>G			PRJNA579792	Glioma
SRR10351712-SRR10351713	chr20	9540266	9540266	C	T	LMCD1	Splice_Site					SNP	splicing	LMCD1	ENSCAFT00000067270.1:exon3:c.1176+1G>A;ENSCAFT00000008964.4:exon4:c.717+1G>A;ENSCAFT00000086797.1:exon3:c.381+1G>A			PRJNA579792	Glioma
SRR10351712-SRR10351713	chr20	12910181	12910181	C	T	ITPR1	Splice_Site					SNP	splicing	ITPR1	ENSCAFT00000009554.4:exon17:c.1886+1G>A			PRJNA579792	Glioma
SRR10351712-SRR10351713	chr20	43902204	43902204	G	A	SUGP1	Splice_Site					SNP	splicing	SUGP1	ENSCAFT00000022747.5:exon5:c.635+1G>A;ENSCAFT00000049900.2:exon4:c.710+1G>A			PRJNA579792	Glioma
SRR10351712-SRR10351713	chr20	52904893	52904893	C	T	KANK3	Splice_Site					SNP	splicing	KANK3	ENSCAFT00000044948.3:exon9:c.2085+1G>A;ENSCAFT00000029379.4:exon7:c.2346+1G>A			PRJNA579792	Glioma
SRR10351712-SRR10351713	chr22	29335787	29335787	C	T	COMMD6	Splice_Site					SNP	splicing	COMMD6	ENSCAFT00000048023.2:exon2:c.186+1G>A			PRJNA579792	Glioma
SRR10351712-SRR10351713	chr23	18187587	18187587	G	T	TOP2B	Splice_Site					SNP	splicing	TOP2B	ENSCAFT00000082785.1:exon24:c.2821-1G>T;ENSCAFT00000009221.5:exon23:c.2797-1G>T;ENSCAFT00000077018.1:exon23:c.2620-1G>T			PRJNA579792	Glioma
SRR10351712-SRR10351713	chr23	28629025	28629025	C	T	CPNE4	Splice_Site					SNP	splicing	CPNE4	ENSCAFT00000010067.4:exon15:c.1593+1G>A			PRJNA579792	Glioma
SRR10351712-SRR10351713	chr24	9332761	9332761	C	T	ISM1	Splice_Site					SNP	splicing	ISM1	ENSCAFT00000089040.1:exon4:c.787+1G>A;ENSCAFT00000077159.1:exon4:c.694+1G>A;ENSCAFT00000078051.1:exon4:c.904+1G>A;ENSCAFT00000009028.4:exon4:c.787+1G>A			PRJNA579792	Glioma
SRR10351712-SRR10351713	chr24	17788177	17788177	C	G	ATRN	Splice_Site					SNP	splicing	ATRN	ENSCAFT00000010258.4:exon10:c.1596-1G>C;ENSCAFT00000093702.1:exon10:c.1596-1G>C			PRJNA579792	Glioma
SRR10351712-SRR10351713	chr24	33625263	33625263	C	T	ELMO2	Splice_Site					SNP	splicing	ELMO2	ENSCAFT00000067072.1:exon4:c.243+1G>A;ENSCAFT00000016446.4:exon4:c.243+1G>A;ENSCAFT00000090041.1:exon4:c.243+1G>A			PRJNA579792	Glioma
SRR10351712-SRR10351713	chr24	44603944	44603944	G	A	CDH26	Splice_Site					SNP	splicing	CDH26	ENSCAFT00000037173.3:exon17:c.2369+1G>A			PRJNA579792	Glioma
SRR10351712-SRR10351713	chr26	6919497	6919497	G	A	ZCCHC8	Splice_Site					SNP	splicing	ZCCHC8	ENSCAFT00000012558.4:exon12:c.1227+1G>A;ENSCAFT00000066612.1:exon11:c.1152+1G>A			PRJNA579792	Glioma
SRR10351712-SRR10351713	chr26	11048001	11048001	C	T	RBM19	Splice_Site					SNP	splicing	RBM19	ENSCAFT00000014561.5:exon24:c.2904+1G>A			PRJNA579792	Glioma
SRR10351712-SRR10351713	chr28	16463843	16463843	C	T	CFAP43	Splice_Site					SNP	splicing	CFAP43	ENSCAFT00000016791.6:exon28:c.3663+1G>A			PRJNA579792	Glioma
SRR10351712-SRR10351713	chr28	17476416	17476416	G	A	SORCS3	Splice_Site					SNP	splicing	SORCS3	ENSCAFT00000016888.4:exon22:c.3057+1G>A;ENSCAFT00000048390.3:exon21:c.2898+1G>A			PRJNA579792	Glioma
SRR10351712-SRR10351713	chr3	14093289	14093289	G	A	TTC37	Splice_Site					SNP	splicing	TTC37	ENSCAFT00000012687.4:exon38:c.4212+1G>A;ENSCAFT00000070843.1:exon38:c.4212+1G>A			PRJNA579792	Glioma
SRR10351712-SRR10351713	chr3	53302771	53302771	C	T	UNC45A	Splice_Site					SNP	splicing	UNC45A	ENSCAFT00000019427.4:exon9:c.856+1G>A			PRJNA579792	Glioma
SRR10351712-SRR10351713	chr30	29390477	29390477	C	T	MTFMT	Splice_Site					SNP	splicing	MTFMT	ENSCAFT00000079182.1:exon10:c.975+1G>A;ENSCAFT00000027116.4:exon8:c.1182+1G>A			PRJNA579792	Glioma
SRR10351712-SRR10351713	chr30	35458955	35458955	C	T	MYO9A	Splice_Site					SNP	splicing	MYO9A	ENSCAFT00000027983.5:exon27:c.5498+1G>A;ENSCAFT00000067812.1:exon28:c.5417+1G>A;ENSCAFT00000083979.1:exon26:c.5441+1G>A;ENSCAFT00000063511.1:exon26:c.5378+1G>A;ENSCAFT00000047923.2:exon26:c.5285+1G>A			PRJNA579792	Glioma
SRR10351712-SRR10351713	chr32	6785516	6785516	C	T	SEC31A	Splice_Site					SNP	splicing	SEC31A	ENSCAFT00000081647.1:exon20:c.2614+1G>A;ENSCAFT00000078582.1:exon21:c.2722+1G>A;ENSCAFT00000014350.4:exon21:c.2722+1G>A;ENSCAFT00000047698.3:exon20:c.2629+1G>A;ENSCAFT00000092003.1:exon19:c.1879+1G>A;ENSCAFT00000065318.1:exon20:c.2629+1G>A;ENSCAFT00000086358.1:exon20:c.2644+1G>A			PRJNA579792	Glioma
SRR10351712-SRR10351713	chr32	24424245	24424245	C	T	BDH2	Splice_Site					SNP	splicing	BDH2	ENSCAFT00000017194.4:exon8:c.533-1G>A			PRJNA579792	Glioma
SRR10351712-SRR10351713	chr33	17048835	17048835	C	T	ATG3	Splice_Site					SNP	splicing	ATG3	ENSCAFT00000016691.4:exon11:c.857+1G>A			PRJNA579792	Glioma
SRR10351712-SRR10351713	chr34	1012368	1012368	G	A	DNAH5	Splice_Site					SNP	splicing	DNAH5	ENSCAFT00000015711.6:exon70:c.12021+1G>A			PRJNA579792	Glioma
SRR10351712-SRR10351713	chr37	9873316	9873316	G	A	AOX4	Splice_Site					SNP	splicing	AOX4	ENSCAFT00000089720.1:exon17:c.1711-1G>A;ENSCAFT00000018742.4:exon17:c.1714-1G>A;ENSCAFT00000018640.5:exon16:c.1654-1G>A			PRJNA579792	Glioma
SRR10351712-SRR10351713	chr38	5932671	5932671	C	T	CDC73	Splice_Site					SNP	splicing	CDC73	ENSCAFT00000076427.1:exon3:c.307+1G>A;ENSCAFT00000016748.4:exon3:c.307+1G>A;ENSCAFT00000065223.1:exon3:c.307+1G>A;ENSCAFT00000075478.1:exon3:c.307+1G>A;ENSCAFT00000088803.1:exon3:c.307+1G>A			PRJNA579792	Glioma
SRR10351712-SRR10351713	chr38	16931072	16931072	G	A	MIA3	Splice_Site					SNP	splicing	MIA3	ENSCAFT00000021557.5:exon20:c.4872+1G>A;ENSCAFT00000087444.1:exon21:c.4785+1G>A;ENSCAFT00000092224.1:exon20:c.4872+1G>A;ENSCAFT00000021570.4:exon18:c.4725+1G>A;ENSCAFT00000089026.1:exon15:c.1404+1G>A			PRJNA579792	Glioma
SRR10351712-SRR10351713	chr5	14779989	14779989	C	T	VPS11	Splice_Site					SNP	splicing	VPS11	ENSCAFT00000019646.4:exon12:c.2063+1G>A			PRJNA579792	Glioma
SRR10351712-SRR10351713	chr5	32856663	32856663	G	A	GUCY2D	Splice_Site					SNP	splicing	GUCY2D	ENSCAFT00000026758.3:exon16:c.2957-1G>A			PRJNA579792	Glioma
SRR10351712-SRR10351713	chr5	63305778	63305778	G	A	UBE4B	Splice_Site					SNP	splicing	UBE4B	ENSCAFT00000031485.5:exon17:c.2393+1G>A;ENSCAFT00000046848.3:exon16:c.1976+1G>A;ENSCAFT00000093787.1:exon15:c.1892+1G>A;ENSCAFT00000046404.2:exon18:c.2543+1G>A			PRJNA579792	Glioma
SRR10351712-SRR10351713	chr5	80303663	80303663	G	A	TERF2	Splice_Site					SNP	splicing	TERF2	ENSCAFT00000090705.1:exon11:c.1464+1G>A			PRJNA579792	Glioma
SRR10351712-SRR10351713	chr6	10584696	10584696	C	T	TRRAP	Splice_Site					SNP	splicing	TRRAP	ENSCAFT00000063243.1:exon30:c.4470+1G>A;ENSCAFT00000024317.6:exon30:c.4470+1G>A;ENSCAFT00000062212.1:exon30:c.4470+1G>A;ENSCAFT00000043609.2:exon30:c.4470+1G>A;ENSCAFT00000070400.1:exon30:c.4470+1G>A;ENSCAFT00000081684.1:exon29:c.4278+1G>A;ENSCAFT00000083122.1:exon30:c.4470+1G>A;ENSCAFT00000063771.1:exon30:c.4470+1G>A;ENSCAFT00000063171.1:exon30:c.4470+1G>A			PRJNA579792	Glioma
SRR10351712-SRR10351713	chr6	31671317	31671317	C	T	CLEC16A	Splice_Site					SNP	splicing	CLEC16A	ENSCAFT00000030036.4:exon17:c.1866+1G>A;ENSCAFT00000030034.4:exon16:c.1860+1G>A			PRJNA579792	Glioma
SRR10351712-SRR10351713	chr6	52873045	52873045	C	T	PTBP2	Splice_Site					SNP	splicing	PTBP2	ENSCAFT00000031985.5:exon12:c.1403+1G>A;ENSCAFT00000067256.1:exon11:c.1354+1G>A;ENSCAFT00000067256.1:exon11:UTR3			PRJNA579792	Glioma
SRR10351712-SRR10351713	chr6	63242594	63242594	G	T	SSX2IP	Splice_Site					SNP	splicing	SSX2IP	ENSCAFT00000032340.4:exon2:c.43+1G>T			PRJNA579792	Glioma
SRR10351712-SRR10351713	chr7	16652805	16652805	C	T	NMNAT2	Splice_Site					SNP	splicing	NMNAT2	ENSCAFT00000070122.1:exon8:c.649+1G>A;ENSCAFT00000021031.4:exon7:c.526+1G>A;ENSCAFT00000043939.2:exon9:c.574+1G>A;ENSCAFT00000046334.3:exon8:c.556+1G>A			PRJNA579792	Glioma
SRR10351712-SRR10351713	chr7	64430180	64430180	C	T	LAMA3	Splice_Site					SNP	splicing	LAMA3	ENSCAFT00000076738.1:exon65:c.8499+1G>A;ENSCAFT00000028869.4:exon64:c.8445+1G>A;ENSCAFT00000083948.1:exon64:c.8415+1G>A;ENSCAFT00000078913.1:exon64:c.8364+1G>A;ENSCAFT00000080468.1:exon64:c.8346+1G>A			PRJNA579792	Glioma
SRR10351712-SRR10351713	chr8	10404710	10404710	C	T	HECTD1	Splice_Site					SNP	splicing	HECTD1	ENSCAFT00000020512.4:exon39:c.7302+1G>A			PRJNA579792	Glioma
SRR10351712-SRR10351713	chr8	22372326	22372326	G	A	C8H14orf28	Splice_Site					SNP	splicing	C8H14orf28	ENSCAFT00000022163.5:exon2:c.662+1G>A			PRJNA579792	Glioma
SRR10351712-SRR10351713	chr8	33807720	33807720	G	A	KIAA0586	Splice_Site					SNP	splicing	KIAA0586	ENSCAFT00000024452.5:exon17:c.2403+1G>A;ENSCAFT00000090695.1:exon17:c.2403+1G>A;ENSCAFT00000084266.1:exon17:c.2598+1G>A;ENSCAFT00000080364.1:exon16:c.2322+1G>A;ENSCAFT00000024449.5:exon17:c.2598+1G>A;ENSCAFT00000063466.1:exon16:c.2268+1G>A;ENSCAFT00000043430.2:exon14:c.2199+1G>A			PRJNA579792	Glioma
SRR10351712-SRR10351713	chr8	38428770	38428770	G	A	SYNE2	Splice_Site					SNP	splicing	SYNE2	ENSCAFT00000068424.1:exon13:c.1569+1G>A;ENSCAFT00000025088.4:exon13:c.1569+1G>A;ENSCAFT00000084224.1:exon13:c.1569+1G>A;ENSCAFT00000088554.1:exon13:c.1569+1G>A;ENSCAFT00000089121.1:exon13:c.1569+1G>A;ENSCAFT00000071827.1:exon13:c.1569+1G>A;ENSCAFT00000066626.1:exon13:c.1569+1G>A;ENSCAFT00000093800.1:exon13:c.1029+1G>A;ENSCAFT00000086166.1:exon13:c.1569+1G>A;ENSCAFT00000078088.1:exon13:c.1569+1G>A			PRJNA579792	Glioma
SRR10351712-SRR10351713	chr8	64112798	64112798	C	T	CLMN	Splice_Site					SNP	splicing	CLMN	ENSCAFT00000028086.4:exon3:c.438+1G>A;ENSCAFT00000049187.3:exon3:c.438+1G>A;ENSCAFT00000086035.1:exon3:c.438+1G>A			PRJNA579792	Glioma
SRR10351712-SRR10351713	chr9	240052	240052	G	A	FASN	Splice_Site					SNP	splicing	FASN	ENSCAFT00000009737.4:exon14:c.2463-1G>A			PRJNA579792	Glioma
SRR10351712-SRR10351713	chr9	11505848	11505848	G	A	ACE	Splice_Site					SNP	splicing	ACE	ENSCAFT00000020636.4:exon15:c.2065-1G>A;ENSCAFT00000078864.1:exon3:c.349-1G>A;ENSCAFT00000062288.1:exon3:c.349-1G>A			PRJNA579792	Glioma
SRR10351712-SRR10351713	chr9	11693163	11693163	C	T	STRADA	Splice_Site					SNP	splicing	STRADA	ENSCAFT00000091898.1:exon6:c.348+1G>A;ENSCAFT00000083484.1:exon3:c.261+1G>A;ENSCAFT00000084794.1:exon6:c.348+1G>A;ENSCAFT00000020495.3:exon6:c.348+1G>A;ENSCAFT00000062527.1:exon6:c.348+1G>A;ENSCAFT00000090837.1:exon4:c.216+1G>A;ENSCAFT00000020503.5:exon3:c.237+1G>A			PRJNA579792	Glioma
SRR10351712-SRR10351713	chr9	20364064	20364064	G	A	RETREG3	Splice_Site					SNP	splicing	RETREG3	ENSCAFT00000049798.2:exon2:c.239+1G>A			PRJNA579792	Glioma
SRR10351712-SRR10351713	chr9	24367338	24367338	A	T	CBX1	Splice_Site					SNP	splicing	CBX1	ENSCAFT00000091215.1:exon3:c.413+2T>A;ENSCAFT00000085480.1:exon3:c.413+2T>A;ENSCAFT00000026643.4:exon3:c.413+2T>A			PRJNA579792	Glioma
SRR10351712-SRR10351713	chr9	31325507	31325507	G	A	ANKFN1	Splice_Site					SNP	splicing	ANKFN1	ENSCAFT00000083683.1:exon10:c.1297+1G>A;ENSCAFT00000048811.3:exon10:c.1297+1G>A;ENSCAFT00000048709.3:exon10:c.1297+1G>A;ENSCAFT00000027522.4:exon10:c.1216+1G>A			PRJNA579792	Glioma
SRR10351712-SRR10351713	chr9	32569317	32569317	C	T	CUEDC1	Splice_Site					SNP	splicing	CUEDC1	ENSCAFT00000027609.4:exon9:c.1013+1G>A			PRJNA579792	Glioma
SRR10351712-SRR10351713	chr9	34439762	34439762	C	T	RNFT1	Splice_Site					SNP	splicing	RNFT1	ENSCAFT00000043037.2:exon3:c.401-1G>A;ENSCAFT00000071007.1:exon4:c.509-1G>A			PRJNA579792	Glioma
SRR10351714-SRR10351715	chr33	24619296	24619296	G	T	STXBP5L	Splice_Site					SNP	splicing	STXBP5L	ENSCAFT00000018158.4:exon19:c.2111-1G>T;ENSCAFT00000085876.1:exon19:c.2111-1G>T			PRJNA579792	Glioma
SRR10351729-SRR10351731	chr2	78062409	78062409	G	A	EIF4G3	Splice_Site					SNP	splicing	EIF4G3	ENSCAFT00000090084.1:exon14:c.1749+1G>A;ENSCAFT00000075650.1:exon13:c.1731+1G>A;ENSCAFT00000085808.1:exon12:c.1698+1G>A;ENSCAFT00000092381.1:exon14:c.1749+1G>A;ENSCAFT00000068279.1:exon11:c.1584+1G>A;ENSCAFT00000075093.1:exon14:c.1752+1G>A;ENSCAFT00000081931.1:exon13:c.1719+1G>A;ENSCAFT00000089284.1:exon12:c.1617+1G>A;ENSCAFT00000023778.5:exon11:c.1605+1G>A;ENSCAFT00000087272.1:exon10:c.1896+1G>A			PRJNA579792	Glioma
SRR10351729-SRR10351731	chr24	47256084	47256084	C	T	ARFRP1	Splice_Site					SNP	splicing	ARFRP1	ENSCAFT00000047793.2:exon3:c.182-1G>A			PRJNA579792	Glioma
SRR10351729-SRR10351731	chr3	3098019	3098019	C	T	FER	Splice_Site					SNP	splicing	FER	ENSCAFT00000011913.2:exon12:c.1533+1G>A;ENSCAFT00000092557.1:exon12:c.1533+1G>A;ENSCAFT00000071604.1:exon11:c.1440+1G>A;ENSCAFT00000085076.1:exon11:c.1413+1G>A;ENSCAFT00000083899.1:exon11:c.1410+1G>A;ENSCAFT00000080626.1:exon10:c.1341+1G>A;ENSCAFT00000072201.1:exon12:c.1329+1G>A			PRJNA579792	Glioma
SRR10351729-SRR10351731	chr5	66984513	66984513	G	A	GINS2	Splice_Site					SNP	splicing	GINS2	ENSCAFT00000086522.1:exon2:c.205+1G>A;ENSCAFT00000031699.4:exon2:c.205+1G>A			PRJNA579792	Glioma
SRR10351729-SRR10351731	chr9	4490630	4490710	GTAAGTATTTGATGGCCAGGGGTCTTTGGCGTCCCCCCCACCCTTCTTTTTTTTTTTTTTTATCTTTTTTTTCCCTTTTGC	G	RNF157	Splice_Site						splicing	RNF157				PRJNA579792	Glioma
SRR10351746-SRR10351747	chr18	50035600	50035600	C	T	RPS6KB2	Splice_Site					SNP	splicing	RPS6KB2	ENSCAFT00000018392.4:exon11:c.963+1G>A;ENSCAFT00000042823.2:exon10:c.1047+1G>A			PRJNA579792	Glioma
SRR10351746-SRR10351747	chr26	10644813	10644835	TAGGGAGGGGTGGGGGCCGGACC	T	TPCN1	Splice_Site						splicing	TPCN1				PRJNA579792	Glioma
SRR10351755-SRR10351756	chr38	22103428	22103428	A	C	KCNJ9	Splice_Site					SNP	splicing	KCNJ9	ENSCAFT00000047817.2:exon1:c.688+2T>G			PRJNA579792	Glioma
SRR10351758-SRR10351759	chr34	17167479	17167479	A	T	ECE2	Splice_Site					SNP	splicing	ECE2	ENSCAFT00000019965.4:exon9:c.1006-2A>T;ENSCAFT00000019958.5:exon8:c.919-2A>T			PRJNA579792	Glioma
SRR10351758-SRR10351759	chr37	21984761	21984761	T	A	BARD1	Splice_Site					SNP	splicing	BARD1	ENSCAFT00000022670.4:exon6:c.1276-2A>T			PRJNA579792	Glioma
SRR10351761-SRR10351762	chr11	51288468	51288468	A	G	DCTN3	Splice_Site					SNP	splicing	DCTN3	ENSCAFT00000003060.4:exon6:c.471+2T>C;ENSCAFT00000078588.1:exon5:c.387+2T>C			PRJNA579792	Glioma
SRR10351761-SRR10351762	chr2	54288097	54288097	G	T	CENPH	Splice_Site					SNP	splicing	CENPH	ENSCAFT00000012353.4:exon3:c.200-1G>T;ENSCAFT00000044846.3:exon3:c.200-1G>T			PRJNA579792	Glioma
SRR10351761-SRR10351762	chr31	39508018	39508022	CTATT	C	MCM3AP	Splice_Site						splicing	MCM3AP				PRJNA579792	Glioma
SRR10351761-SRR10351762	chr38	2263778	2263778	C	A	PM20D1	Splice_Site					SNP	splicing	PM20D1	ENSCAFT00000016137.4:exon6:c.690-1G>T;ENSCAFT00000071331.1:exon5:c.603-1G>T;ENSCAFT00000078527.1:exon5:c.603-1G>T			PRJNA579792	Glioma
SRR10351761-SRR10351762	chr4	67660441	67660441	C	T	FBXO4	Splice_Site					SNP	splicing	FBXO4	ENSCAFT00000029504.4:exon3:c.426-1G>A;ENSCAFT00000066912.1:exon3:c.426-1G>A			PRJNA579792	Glioma
SRR10351761-SRR10351762	chr9	12304118	12304118	C	A	DDX5	Splice_Site					SNP	splicing	DDX5	ENSCAFT00000018595.4:exon9:c.811-1G>T;ENSCAFT00000064695.1:exon8:c.574-1G>T			PRJNA579792	Glioma
SRR10351761-SRR10351762	chr9	15713305	15713305	A	G	ABCA5	Splice_Site					SNP	splicing	ABCA5	ENSCAFT00000076821.1:exon35:c.4559+2T>C;ENSCAFT00000017260.4:exon34:c.4460+2T>C			PRJNA579792	Glioma
SRR10351766-SRR10351767	chr17	59209395	59209395	C	CCA	SF3B4	Splice_Site						splicing	SF3B4	ENSCAFT00000018450.3:exon6:c.1088-1G>TGG			PRJNA579792	Glioma
SRR10351766-SRR10351767	chr8	1349093	1349093	C	T	TRIP11	Splice_Site					SNP	splicing	TRIP11	ENSCAFT00000017315.4:exon3:c.190-1G>A;ENSCAFT00000066300.1:exon3:c.190-1G>A;ENSCAFT00000065388.1:exon2:c.25-1G>A			PRJNA579792	Glioma
SRR10351770-SRR10351771	chr10	40559602	40559602	A	G	SLC9A4	Splice_Site					SNP	splicing	SLC9A4	ENSCAFT00000047526.2:exon1:c.256+2T>C			PRJNA579792	Glioma
SRR10351770-SRR10351771	chr16	15091693	15091693	G	A	ABCB8	Splice_Site					SNP	splicing	ABCB8	ENSCAFT00000007562.4:exon10:c.1251+1G>A;ENSCAFT00000061570.1:exon9:c.987+1G>A			PRJNA579792	Glioma
SRR10351770-SRR10351771	chr20	22659957	22659957	G	A	UBA3	Splice_Site					SNP	splicing	UBA3	ENSCAFT00000010561.5:exon3:c.63-1G>A;ENSCAFT00000068638.1:exon2:c.21-1G>A;ENSCAFT00000078673.1:exon2:c.21-1G>A;ENSCAFT00000088535.1:exon2:c.21-1G>A;ENSCAFT00000036344.3:exon2:c.90-1G>A			PRJNA579792	Glioma
SRR10351770-SRR10351771	chr20	53365638	53365638	C	T	EMR4	Splice_Site					SNP	splicing	EMR4	ENSCAFT00000029474.4:exon5:c.393+1G>A;ENSCAFT00000081056.1:exon5:c.393+1G>A;ENSCAFT00000088461.1:exon4:c.324+1G>A			PRJNA579792	Glioma
SRR10351770-SRR10351771	chr20	55224019	55224019	C	T	HDGFL2	Splice_Site					SNP	splicing	HDGFL2	ENSCAFT00000030241.5:exon2:c.275+1G>A			PRJNA579792	Glioma
SRR10351770-SRR10351771	chr29	18175879	18175879	G	A	C29H8orf34	Splice_Site					SNP	splicing	C29H8orf34	ENSCAFT00000012249.4:exon12:c.1213+1G>A			PRJNA579792	Glioma
SRR10351770-SRR10351771	chr30	23114387	23114387	C	T	ALDH1A2	Splice_Site					SNP	splicing	ALDH1A2	ENSCAFT00000063247.1:exon5:c.468+1G>A;ENSCAFT00000026216.4:exon5:c.555+1G>A;ENSCAFT00000078878.1:exon5:c.555+1G>A;ENSCAFT00000075497.1:exon5:c.555+1G>A;ENSCAFT00000084795.1:exon5:c.555+1G>A;ENSCAFT00000060068.1:exon5:c.555+1G>A			PRJNA579792	Glioma
SRR10351770-SRR10351771	chr31	26564204	26564204	C	T	SCAF4	Splice_Site					SNP	splicing	SCAF4	ENSCAFT00000073147.1:exon16:c.2106+1G>A;ENSCAFT00000086503.1:exon17:c.1986+1G>A;ENSCAFT00000069498.1:exon16:c.1809+1G>A;ENSCAFT00000014079.5:exon14:c.1953+1G>A			PRJNA579792	Glioma
SRR10351770-SRR10351771	chr34	35986785	35986785	C	T	PLD1	Splice_Site					SNP	splicing	PLD1	ENSCAFT00000050001.3:exon16:c.1757-1G>A;ENSCAFT00000024237.4:exon14:c.1629-1G>A;ENSCAFT00000024237.4:exon14:UTR3			PRJNA579792	Glioma
SRR10351770-SRR10351771	chr36	13653735	13653735	A	T	NOSTRIN	Splice_Site					SNP	splicing	NOSTRIN	ENSCAFT00000062526.1:exon7:c.415-2A>T;ENSCAFT00000089434.1:exon6:c.352-2A>T;ENSCAFT00000018819.4:exon6:c.343-2A>T;ENSCAFT00000090649.1:exon5:c.259-2A>T;ENSCAFT00000086782.1:exon4:c.196-2A>T			PRJNA579792	Glioma
SRR10351770-SRR10351771	chr37	18334348	18334348	G	A	CPS1	Splice_Site					SNP	splicing	CPS1	ENSCAFT00000087977.1:exon5:c.471+1G>A;ENSCAFT00000065057.1:exon5:c.471+1G>A;ENSCAFT00000067245.1:exon5:c.471+1G>A;ENSCAFT00000075634.1:exon5:c.471+1G>A;ENSCAFT00000088539.1:exon5:c.471+1G>A;ENSCAFT00000089713.1:exon6:UTR5;ENSCAFT00000022222.4:exon5:c.495+1G>A;ENSCAFT00000076588.1:exon5:c.567+1G>A			PRJNA579792	Glioma
SRR10351770-SRR10351771	chr5	47506240	47506240	G	A	DOCK7	Splice_Site					SNP	splicing	DOCK7	ENSCAFT00000045273.2:exon12:c.1102-1G>A			PRJNA579792	Glioma
SRR10351770-SRR10351771	chr5	77526490	77526490	A	G	PHLPP2	Splice_Site					SNP	splicing	PHLPP2	ENSCAFT00000032187.4:exon14:c.1518+2T>C;ENSCAFT00000064591.1:exon15:c.1506+2T>C			PRJNA579792	Glioma
SRR10351770-SRR10351771	chr7	28616686	28616686	G	A	KIFAP3	Splice_Site					SNP	splicing	KIFAP3	ENSCAFT00000023932.4:exon4:c.375+1G>A;ENSCAFT00000072650.1:exon3:c.243+1G>A			PRJNA579792	Glioma
SRR10351770-SRR10351771	chr9	54568549	54568549	G	A	CRAT	Splice_Site					SNP	splicing	CRAT	ENSCAFT00000031823.3:exon1:c.27+1G>A			PRJNA579792	Glioma
SRR10351774-SRR10351776	chr16	45787981	45787981	G	A	ACSL1	Splice_Site					SNP	splicing	ACSL1	ENSCAFT00000012314.4:exon9:c.841+1G>A;ENSCAFT00000064807.1:exon9:c.841+1G>A;ENSCAFT00000070086.1:exon8:c.739+1G>A;ENSCAFT00000072503.1:exon9:c.841+1G>A;ENSCAFT00000089501.1:exon9:c.907+1G>A;ENSCAFT00000068275.1:exon9:c.907+1G>A;ENSCAFT00000089470.1:exon9:c.907+1G>A			PRJNA579792	Glioma
