# Supplementary material for: The Genetic Landscape of Canine Tumors: Insights from the Canine Cancer Genome Atlas (CCGA)
Source: Research Square preprint supplement (doi:10.21203/rs.3.rs-5025541/v1), 2024-09-19
Supplement: Supplementary file 18 [file f530d921057a2c77ad39a32e.xlsx]

## Sheet: Osteosarcoma
Hugo_Symbol

## Sheet: Mammary Tumor
Hugo_Symbol

## Sheet: Hemangiosarcoma
Hugo_Symbol

## Sheet: B-cell Lymphoma
Hugo_Symbol

## Sheet: T-cell Lymphoma
Hugo_Symbol

## Sheet: Glioma
Hugo_Symbol

## Sheet: Melanoma
Hugo_Symbol

## Sheet: Mast Cell Tumor
Hugo_Symbol

## Sheet: Pulmonary Adenocarcinoma
Hugo_Symbol

## Sheet: Urinary Carcinoma
Hugo_Symbol
