# Supplementary material for: The Genetic Landscape of Canine Tumors: Insights from the Canine Cancer Genome Atlas (CCGA)
Source: Research Square preprint supplement (doi:10.21203/rs.3.rs-5025541/v1), 2024-09-19
Supplement: Supplementary file 19 [file fa2b6f830dd945688025a17c.xlsx]

## Sheet: SuppTable1
PMID	Title	Authors	Citation	First Author	Journal/Book	Publication Year	Create Date	PMCID	NIHMS ID	DOI	Histotype
26377837	Exome sequencing of lymphomas from three dog breeds reveals somatic mutation patterns reflecting genetic background	Elvers I, Turner-Maier J, Swofford R, Koltookian M, Johnson J, Stewart C, Zhang CZ, Schumacher SE, Beroukhim R, Rosenberg M, Thomas R, Mauceli E, Getz G, Palma FD, Modiano JF, Breen M, Lindblad-Toh K, Alföldi J.	Genome Res. 2015 Nov;25(11):1634-45. doi: 10.1101/gr.194449.115. Epub 2015 Sep 16.	Elvers I	Genome Res	2015	2015-09-18	PMC4617960		10.1101/gr.194449.115	B-Cell and T-Cell Lymphomas
25468570	Genetic inactivation of TRAF3 in canine and human B-cell lymphoma	Bushell KR, Kim Y, Chan FC, Ben-Neriah S, Jenks A, Alcaide M, Fornika D, Grande BM, Arthur S, Gascoyne RD, Steidl C, Morin RD.	Blood. 2015 Feb 5;125(6):999-1005. doi: 10.1182/blood-2014-10-602714. Epub 2014 Dec 2.	Bushell KR	Blood	2015	2014-12-04			10.1182/blood-2014-10-602714	B-Cell Lymphomas
35726023	The genomic landscape of canine diffuse large B-cell lymphoma identifies distinct subtypes with clinical and therapeutic implications	Giannuzzi D, Marconato L, Fanelli A, Licenziato L, De Maria R, Rinaldi A, Rotta L, Rouquet N, Birolo G, Fariselli P, Mensah AA, Bertoni F, Aresu L.	Lab Anim (NY). 2022 Jul;51(7):191-202. doi: 10.1038/s41684-022-00998-x. Epub 2022 Jun 20.	Giannuzzi D	Lab Anim (NY)	2022	2022-06-21			10.1038/s41684-022-00998-x	B-Cell Lymphomas
31842489	Somatic Mutation of PIK3CA (H1047R) Is a Common Driver Mutation Hotspot in Canine Mammary Tumors as Well as Human Breast Cancers	Lee KH, Hwang HJ, Noh HJ, Shin TJ, Cho JY.	Cancers (Basel). 2019 Dec 12;11(12):2006. doi: 10.3390/cancers11122006.	Lee KH	Cancers (Basel)	2019	2019-12-18	PMC6966585		10.3390/cancers11122006	CMT
31413331	Whole-exome and whole-transcriptome sequencing of canine mammary gland tumors	Kim KK, Seung BJ, Kim D, Park HM, Lee S, Song DW, Lee G, Cheong JH, Nam H, Sur JH, Kim S.	Sci Data. 2019 Aug 14;6(1):147. doi: 10.1038/s41597-019-0149-8.	Kim KK	Sci Data	2019	2019-08-16	PMC6694171		10.1038/s41597-019-0149-8	CMT
32049048	Comparative Molecular Life History of Spontaneous Canine and Human Gliomas	Amin SB, Anderson KJ, Boudreau CE, Martinez-Ledesma E, Kocakavuk E, Johnson KC, Barthel FP, Varn FS, Kassab C, Ling X, Kim H, Barter M, Lau CC, Ngan CY, Chapman M, Koehler JW, Long JP, Miller AD, Miller CR, Porter BF, Rissi DR, Mazcko C, LeBlanc AK, Dickinson PJ, Packer RA, Taylor AR, Rossmeisl JH Jr, Woolard KD, Heimberger AB, Levine JM, Verhaak RGW.	Cancer Cell. 2020 Feb 10;37(2):243-257.e7. doi: 10.1016/j.ccell.2020.01.004.	Amin SB	Cancer Cell	2020	2020-02-13	PMC7132629	NIHMS1569196	10.1016/j.ccell.2020.01.004	Glioma
29190660	Actionable mutations in canine hemangiosarcoma	Wang G, Wu M, Maloneyhuss MA, Wojcik J, Durham AC, Mason NJ, Roth DB.	PLoS One. 2017 Nov 30;12(11):e0188667. doi: 10.1371/journal.pone.0188667. eCollection 2017.	Wang G	PLoS One	2017	2017-12-01	PMC5708669		10.1371/journal.pone.0188667	Hemangiosarcoma
31570656	Comparative Genomics Reveals Shared Mutational Landscape in Canine Hemangiosarcoma and Human Angiosarcoma	Megquier K, Turner-Maier J, Swofford R, Kim JH, Sarver AL, Wang C, Sakthikumar S, Johnson J, Koltookian M, Lewellen M, Scott MC, Schulte AJ, Borst L, Tonomura N, Alfoldi J, Painter C, Thomas R, Karlsson EK, Breen M, Modiano JF, Elvers I, Lindblad-Toh K.	Mol Cancer Res. 2019 Dec;17(12):2410-2421. doi: 10.1158/1541-7786.MCR-19-0221. Epub 2019 Sep 30.	Megquier K	Mol Cancer Res	2019	2019-10-02	PMC7067513	NIHMS1540746	10.1158/1541-7786.MCR-19-0221	Hemangiosarcoma
35867969	Genomic landscapes of canine splenic angiosarcoma (hemangiosarcoma) contain extensive heterogeneity within and between patients	Wong S, Ehrhart EJ, Stewart S, Zismann V, Cawley J, Halperin R, Briones N, Richter K, Sivaprakasam K, Perdigones N, Contente-Cuomo T, Facista S, Trent JM, Murtaza M, Khanna C, Hendricks WPD.	PLoS One. 2022 Jul 22;17(7):e0264986. doi: 10.1371/journal.pone.0264986. eCollection 2022.	Wong S	PLoS One	2022	2022-07-22	PMC9307279		10.1371/journal.pone.0264986	Hemangiosarcoma
31999054	Recurrent gene mutations detected in canine mast cell tumours by next generation sequencing	Vozdova M, Kubickova S, Pal K, Fröhlich J, Fictum P, Rubes J.	Vet Comp Oncol. 2020 Dec;18(4):509-518. doi: 10.1111/vco.12572. Epub 2020 Feb 7.	Vozdova M	Vet Comp Oncol	2020	2020-01-31			10.1111/vco.12572	Mast Cell Tumour
35053440	Canine Oral Melanoma Genomic and Transcriptomic Study Defines Two Molecular Subgroups with Different Therapeutical Targets	Prouteau A, Mottier S, Primot A, Cadieu E, Bachelot L, Botherel N, Cabillic F, Houel A, Cornevin L, Kergal C, Corre S, Abadie J, Hitte C, Gilot D, Lindblad-Toh K, André C, Derrien T, Hedan B.	Cancers (Basel). 2022 Jan 6;14(2):276. doi: 10.3390/cancers14020276.	Prouteau A	Cancers (Basel)	2022	2022-01-21	PMC8774001		10.3390/cancers14020276	Melanoma
30664638	Cross-species genomic landscape comparison of human mucosal melanoma with canine oral and equine melanoma	Wong K, van der Weyden L, Schott CR, Foote A, Constantino-Casas F, Smith S, Dobson JM, Murchison EP, Wu H, Yeh I, Fullen DR, Joseph N, Bastian BC, Patel RM, Martincorena I, Robles-Espinoza CD, Iyer V, Kuijjer ML, Arends MJ, Brenn T, Harms PW, Wood GA, Adams DJ.	Nat Commun. 2019 Jan 21;10(1):353. doi: 10.1038/s41467-018-08081-1.	Wong K	Nat Commun	2019	2019-01-22	PMC6341101		10.1038/s41467-018-08081-1	Melanoma
30805995	Longitudinal transcriptomic and genetic landscape of radiotherapy response in canine melanoma	Giannuzzi D, Marconato L, Elgendy R, Ferraresso S, Scarselli E, Fariselli P, Nicosia A, Pegolo S, Leoni G, Laganga P, Leone VF, Giantin M, Troise F, Dacasto M, Aresu L.	Vet Comp Oncol. 2019 Sep;17(3):308-316. doi: 10.1111/vco.12473. Epub 2019 Mar 27.	Giannuzzi D	Vet Comp Oncol	2019	2019-02-27			10.1111/vco.12473	Melanoma
31341965	Canine osteosarcoma genome sequencing identifies recurrent mutations in DMD and the histone methyltransferase gene SETD2	Gardner HL, Sivaprakasam K, Briones N, Zismann V, Perdigones N, Drenner K, Facista S, Richholt R, Liang W, Aldrich J, Trent JM, Shields PG, Robinson N, Johnson J, Lana S, Houghton P, Fenger J, Lorch G, Janeway KA, London CA, Hendricks WPD.	Commun Biol. 2019 Jul 19;2:266. doi: 10.1038/s42003-019-0487-2. eCollection 2019.	Gardner HL	Commun Biol	2019	2019-07-26	PMC6642146		10.1038/s42003-019-0487-2	Osteosarcoma
34635775	Immune pathways and TP53 missense mutations are associated with longer survival in canine osteosarcoma	Das S, Idate R, Regan DP, Fowles JS, Lana SE, Thamm DH, Gustafson DL, Duval DL.	Commun Biol. 2021 Oct 11;4(1):1178. doi: 10.1038/s42003-021-02683-0.	Das S	Commun Biol	2021	2021-10-12	PMC8505454		10.1038/s42003-021-02683-0	Osteosarcoma
29724721	SETD2 Is Recurrently Mutated in Whole-Exome Sequenced Canine Osteosarcoma	Sakthikumar S, Elvers I, Kim J, Arendt ML, Thomas R, Turner-Maier J, Swofford R, Johnson J, Schumacher SE, Alföldi J, Axelsson E, Couto CG, Kisseberth WC, Pettersson ME, Getz G, Meadows JRS, Modiano JF, Breen M, Kierczak M, Forsberg-Nilsson K, Marinescu VD, Lindblad-Toh K.	Cancer Res. 2018 Jul 1;78(13):3421-3431. doi: 10.1158/0008-5472.CAN-17-3558. Epub 2018 May 3.	Sakthikumar S	Cancer Res	2018	2018-05-05			10.1158/0008-5472.CAN-17-3558	Osteosarcoma
33556121	Unraveling the chaotic genomic landscape of primary and metastatic canine appendicular osteosarcoma with current sequencing technologies and bioinformatic approaches	Chu S, Skidmore ZL, Kunisaki J, Walker JR, Griffith M, Griffith OL, Bryan JN.	PLoS One. 2021 Feb 8;16(2):e0246443. doi: 10.1371/journal.pone.0246443. eCollection 2021.	Chu S	PLoS One	2021	2021-02-08	PMC7870011		10.1371/journal.pone.0246443	Osteosarcoma
31431454	Identification of Recurrent Activating HER2 Mutations in Primary Canine Pulmonary Adenocarcinoma	Lorch G, Sivaprakasam K, Zismann V, Perdigones N, Contente-Cuomo T, Nazareno A, Facista S, Wong S, Drenner K, Liang WS, Amann JM, Sinicropi-Yao SL, Koenig MJ, La Perle K, Whitsett TG, Murtaza M, Trent JM, Carbone DP, Hendricks WPD.	Clin Cancer Res. 2019 Oct 1;25(19):5866-5877. doi: 10.1158/1078-0432.CCR-19-1145. Epub 2019 Aug 20.	Lorch G	Clin Cancer Res	2019	2019-08-22	PMC6774847	NIHMS1536702	10.1158/1078-0432.CCR-19-1145	Pulmonary Adenocarcinoma
34021685	Characterizing the molecular and immune landscape of canine bladder cancer	Cronise KE, Das S, Hernandez BG, Regan DP, Dailey DD, McGeachan RI, Lana SE, Page RL, Gustafson DL, Duval DL.	Vet Comp Oncol. 2022 Mar;20(1):69-81. doi: 10.1111/vco.12740. Epub 2021 Jun 1.	Cronise KE	Vet Comp Oncol	2022	2021-05-22	PMC8606617	NIHMS1730956	10.1111/vco.12740	Urinary Transitional Cell Carcinoma
28052524	Cross-species analysis of the canine and human bladder cancer transcriptome and exome	Ramsey SA, Xu T, Goodall C, Rhodes AC, Kashyap A, He J, Bracha S.	Genes Chromosomes Cancer. 2017 Apr;56(4):328-343. doi: 10.1002/gcc.22441. Epub 2017 Jan 25.	Ramsey SA	Genes Chromosomes Cancer	2017	2017-01-05			10.1002/gcc.22441	Urinary Transitional Cell Carcinoma
